# Supplementary material for: Mapping single-cell atlases throughout Metazoa unravels cell type evolution
Source: eLife journal article supplement (doi:10.7554/elife.66747), 2021-05-04
Supplement: supp [file elife_poa_e66747_Supplementary_file_4.xlsx]

## Sheet: paralog_substitutions
Ortholog pairs	Paralog pairs	Ortholog correlation	Paralog correlation	Correlation difference	Most recent common ancestor	Differentially expressing cell types (Danio rerio)	Differentially expressing cell types (Xenopus tropicalis)	Substitution?
Xt_klhl40;Dr_klhl40b	Xt_klhl40;Dr_klhl41b	0	0.931263	0.931263	Chordata	Dr_Skeletal muscle	Xt_Skeletal muscle	FALSE
Xt_klhl40;Dr_klhl40a	Xt_klhl40;Dr_klhl41b	0	0.931263	0.931263	Chordata	Dr_Skeletal muscle	Xt_Skeletal muscle	TRUE
Xt_ckm;Dr_ckbb	Xt_ckm;Dr_ckmb	0	0.889237	0.889237	Chordata	Dr_Skeletal muscle	Xt_Skeletal muscle	FALSE
Xt_loxl2;Dr_loxl2a	Xt_loxl2;Dr_loxl3b	0	0.767235	0.767235	Chordata			FALSE
Dr_loxl3b;Xt_LOC101733365	Dr_loxl3b;Xt_loxl2	0	0.767235	0.767235	Chordata			TRUE
Xt_t;Dr_t	Xt_t;Dr_ta	0	0.741202	0.741202	Chordata	Dr_Dorsal organizer;Dr_Involuting marginal zone;Dr_Notochord;Dr_Presomitic mesoderm;Dr_Tailbud	Xt_Involuting marginal zone;Xt_Notochord;Xt_Presomitic mesoderm;Xt_Spemann organizer;Xt_Tailbud	FALSE
Xt_Xetrov90007542m;Dr_zgc:152670	Xt_Xetrov90007542m;Dr_p4ha1b	0	0.680132	0.680132	Chordata	Dr_Epidermal progenitor;Dr_Notochord;Dr_Placodal area	Xt_Epidermal progenitor;Xt_Notochord	FALSE
Xt_cldn4;Dr_LOC100147871	Xt_cldn4;Dr_cldne	0.0170067	0.669905	0.652898	Chordata	Dr_Endoderm;Dr_Ionocyte;Dr_Rare epidermal subtypes;Dr_Secretory epidermal	Xt_Cement gland primordium;Xt_Endoderm;Xt_Goblet cell;Xt_Hatching gland;Xt_Ionocyte;Xt_Small secretory cells	TRUE
Xt_ckm;Dr_ckba	Xt_ckm;Dr_ckmb	0.244929	0.889237	0.644308	Chordata	Dr_Skeletal muscle	Xt_Skeletal muscle	FALSE
Dr_p4ha1b;Xt_Xetrov90017956m	Dr_p4ha1b;Xt_Xetrov90007542m	0.0466849	0.680132	0.633447	Chordata	Dr_Epidermal progenitor;Dr_Notochord;Dr_Placodal area	Xt_Epidermal progenitor;Xt_Notochord	FALSE
Dr_p4ha1b;Xt_p4ha1-like.2	Dr_p4ha1b;Xt_Xetrov90007542m	0.0727706	0.680132	0.607361	Chordata	Dr_Epidermal progenitor;Dr_Notochord;Dr_Placodal area	Xt_Epidermal progenitor;Xt_Notochord	TRUE
Xt_syncrip;Dr_syncrip	Xt_syncrip;Dr_hnrnpr	0	0.598846	0.598846	Chordata	Dr_Dorsal organizer;Dr_Involuting marginal zone;Dr_Neuroectoderm;Dr_Non-neural ectoderm	Xt_Involuting marginal zone;Xt_Neuroectoderm;Xt_Non-neural ectoderm;Xt_Spemann organizer	FALSE
Xt_cldn4;Dr_cldnd	Xt_cldn4;Dr_cldne	0.0812548	0.669905	0.58865	Chordata	Dr_Endoderm;Dr_Ionocyte;Dr_Rare epidermal subtypes;Dr_Secretory epidermal	Xt_Cement gland primordium;Xt_Endoderm;Xt_Goblet cell;Xt_Hatching gland;Xt_Ionocyte;Xt_Small secretory cells	FALSE
Dr_hnrnpr;Xt_hnrnpr-like	Dr_hnrnpr;Xt_syncrip	0.0416191	0.598846	0.557226	Chordata	Dr_Dorsal organizer;Dr_Involuting marginal zone;Dr_Neuroectoderm;Dr_Non-neural ectoderm	Xt_Involuting marginal zone;Xt_Neuroectoderm;Xt_Non-neural ectoderm;Xt_Spemann organizer	FALSE
Dr_p4ha2;Xt_LOC101734880	Dr_p4ha2;Xt_p4ha1-like.1	0	0.55535	0.55535	Chordata	Dr_Dorsal organizer;Dr_Notochord	Xt_Notochord;Xt_Spemann organizer	TRUE
Xt_myl9;Dr_myl9a	Xt_myl9;Dr_myl12.1	0	0.553637	0.553637	Chordata	Dr_Endothelial;Dr_Epidermal progenitor;Dr_Intermediate mesoderm;Dr_Placodal area	Xt_Endothelial;Xt_Epidermal progenitor;Xt_Placodal area	FALSE
Dr_pfklb;Xt_LOC101733741	Dr_pfklb;Xt_pfkp	0	0.546344	0.546344	Chordata	Dr_Epidermal progenitor;Dr_Skeletal muscle	Xt_Epidermal progenitor;Xt_Skeletal muscle	FALSE
Xt_pfkp;Dr_pfkpb	Xt_pfkp;Dr_pfklb	0	0.546344	0.546344	Chordata	Dr_Epidermal progenitor;Dr_Skeletal muscle	Xt_Epidermal progenitor;Xt_Skeletal muscle	FALSE
Xt_pfkp;Dr_pfkpa	Xt_pfkp;Dr_pfklb	0	0.546344	0.546344	Chordata	Dr_Epidermal progenitor;Dr_Skeletal muscle	Xt_Epidermal progenitor;Xt_Skeletal muscle	FALSE
Xt_cldn6.1;Dr_cldna	Xt_cldn6.1;Dr_cldnd	0	0.54364	0.54364	Chordata	Dr_Blastula	Xt_Blastula	FALSE
Dr_ccne2;Xt_ccne2	Dr_ccne2;Xt_ccne1	0.0356672	0.571029	0.535362	Chordata	Dr_Involuting marginal zone;Dr_Neuroectoderm;Dr_Non-neural ectoderm	Xt_Involuting marginal zone;Xt_Neuroectoderm;Xt_Non-neural ectoderm	FALSE
Dr_six3a;Xt_six3	Dr_six3a;Xt_six6	0	0.517978	0.517978	Chordata	Dr_Eye primordium;Dr_Forebrain/midbrain;Dr_Optic	Xt_Eye primordium;Xt_Optic	TRUE
Xt_smek2;Dr_LOC103911969	Xt_smek2;Dr_smek1	0.0184395	0.534885	0.516446	Chordata	Dr_Blastula;Dr_Involuting marginal zone;Dr_Neuroectoderm;Dr_Non-neural ectoderm;Dr_Tailbud	Xt_Blastula;Xt_Hindbrain;Xt_Involuting marginal zone;Xt_Neuroectoderm;Xt_Non-neural ectoderm	TRUE
Dr_si:ch73-386h18.1;Xt_zfhx3	Dr_si:ch73-386h18.1;Xt_zfhx4	0	0.511945	0.511945	Chordata	Dr_Forebrain/midbrain;Dr_Hindbrain;Dr_Neuron	Xt_Forebrain/midbrain;Xt_Hindbrain;Xt_Neuron	FALSE
Dr_tie1;Xt_tie1	Dr_tie1;Xt_tek	0.125216	0.635337	0.510121	Chordata			FALSE
Xt_arvcf;Dr_arvcfb	Xt_arvcf;Dr_ctnnd1	0	0.509954	0.509954	Chordata	Dr_Endoderm;Dr_Epidermal progenitor;Dr_Involuting marginal zone;Dr_Neuroectoderm;Dr_Non-neural ectoderm;Dr_Placodal area	Xt_Endoderm;Xt_Epidermal progenitor;Xt_Involuting marginal zone;Xt_Neuroectoderm;Xt_Non-neural ectoderm;Xt_Placodal area;Xt_Small secretory cells	FALSE
Xt_papola;Dr_papola	Xt_papola;Dr_papolg	0	0.500787	0.500787	Chordata	Dr_Blastula	Xt_Blastula	FALSE
Dr_stab1;Xt_LOC100491533	Dr_stab1;Xt_stab2	0	0.497856	0.497856	Chordata			TRUE
Xt_stab2;Dr_LOC101882428	Xt_stab2;Dr_stab1	0	0.497856	0.497856	Chordata			FALSE
Xt_hnrnph3;Dr_hnrnph3	Xt_hnrnph3;Dr_hnrnph1l	0	0.49447	0.49447	Chordata	Dr_Eye primordium;Dr_Neuroectoderm;Dr_Non-neural ectoderm;Dr_Presomitic mesoderm;Dr_Tailbud	Xt_Eye primordium;Xt_Hindbrain;Xt_Neuroectoderm;Xt_Non-neural ectoderm;Xt_Optic;Xt_Tailbud	FALSE
Xt_t2;Dr_t	Xt_t2;Dr_ta	0	0.482578	0.482578	Chordata	Dr_Involuting marginal zone;Dr_Notochord;Dr_Presomitic mesoderm;Dr_Tailbud	Xt_Involuting marginal zone;Xt_Notochord;Xt_Tailbud	FALSE
Dr_grhl2a;Xt_grhl2	Dr_grhl2a;Xt_grhl1	0	0.481791	0.481791	Chordata	Dr_Hatching gland;Dr_Ionocyte;Dr_Rare epidermal subtypes;Dr_Secretory epidermal	Xt_Cement gland primordium;Xt_Goblet cell;Xt_Hatching gland;Xt_Ionocyte;Xt_Small secretory cells	FALSE
Dr_zar1;Xt_zar1	Dr_zar1;Xt_LOC734032-like	0.035583	0.516498	0.480915	Chordata	Dr_Blastula	Xt_Blastula	FALSE
Xt_six6;Dr_six6b	Xt_six6;Dr_six3a	0.0378118	0.517978	0.480166	Chordata	Dr_Eye primordium;Dr_Forebrain/midbrain;Dr_Optic	Xt_Eye primordium;Xt_Optic	FALSE
Xt_six6;Dr_six6a	Xt_six6;Dr_six3a	0.0539919	0.517978	0.463986	Chordata	Dr_Eye primordium;Dr_Forebrain/midbrain;Dr_Optic	Xt_Eye primordium;Xt_Optic	FALSE
Dr_plod3;Xt_plod3	Dr_plod3;Xt_Xetrov90018273m	0.0150868	0.478277	0.463191	Chordata	Dr_Dorsal organizer;Dr_Endothelial;Dr_Intermediate mesoderm;Dr_Notochord;Dr_Notoplate;Dr_Presomitic mesoderm	Xt_Endothelial;Xt_Notochord;Xt_Notoplate;Xt_Skeletal muscle;Xt_Spemann organizer	FALSE
Dr_cldnd;Xt_cldn4	Dr_cldnd;Xt_cldn6.1	0.0812548	0.54364	0.462385	Chordata	Dr_Blastula	Xt_Blastula	FALSE
Xt_p4ha1-like.1;Dr_p4ha1a	Xt_p4ha1-like.1;Dr_p4ha2	0.105144	0.55535	0.450205	Chordata	Dr_Dorsal organizer;Dr_Notochord	Xt_Notochord;Xt_Spemann organizer	FALSE
Xt_srsf5;Dr_srsf5b	Xt_srsf5;Dr_srsf6a	0	0.442298	0.442298	Chordata	Dr_Dorsal organizer;Dr_Endoderm;Dr_Involuting marginal zone;Dr_Neuroectoderm;Dr_Non-neural ectoderm;Dr_Notochord	Xt_Endoderm;Xt_Involuting marginal zone;Xt_Neuroectoderm;Xt_Non-neural ectoderm;Xt_Spemann organizer	FALSE
Xt_myl12b;Dr_myl12.2	Xt_myl12b;Dr_myl9b	0	0.441301	0.441301	Chordata	Dr_Endothelial;Dr_Epidermal progenitor;Dr_Intermediate mesoderm;Dr_Macrophage;Dr_Placodal area;Dr_Rare epidermal subtypes	Xt_Endothelial;Xt_Epidermal progenitor;Xt_Goblet cell;Xt_Hatching gland;Xt_Myeloid progenitors;Xt_Placodal area;Xt_Small secretory cells	FALSE
Xt_actc1;Dr_acta2	Xt_actc1;Dr_actc1a	0.49768	0.935604	0.437925	Chordata	Dr_Intermediate mesoderm;Dr_Presomitic mesoderm;Dr_Skeletal muscle	Xt_Intermediate mesoderm;Xt_Presomitic mesoderm;Xt_Skeletal muscle	FALSE
Xt_actc1;Dr_acta2	Xt_actc1;Dr_hm:zewp0073	0.49768	0.93548	0.437801	Chordata	Dr_Intermediate mesoderm;Dr_Presomitic mesoderm;Dr_Skeletal muscle	Xt_Intermediate mesoderm;Xt_Presomitic mesoderm;Xt_Skeletal muscle	FALSE
Xt_srsf5;Dr_srsf5b	Xt_srsf5;Dr_srsf4	0	0.436267	0.436267	Chordata	Dr_Dorsal organizer;Dr_Endoderm;Dr_Involuting marginal zone;Dr_Neuroectoderm;Dr_Non-neural ectoderm;Dr_Notochord	Xt_Endoderm;Xt_Involuting marginal zone;Xt_Neuroectoderm;Xt_Non-neural ectoderm;Xt_Spemann organizer	FALSE
Xt_tfap2e;Dr_tfap2e	Xt_tfap2e;Dr_tfap2a	0	0.430606	0.430606	Chordata	Dr_Neural crest	Xt_Neural crest	FALSE
Xt_rbm27;Dr_rbm27	Xt_rbm27;Dr_rbm26	0.0165395	0.442276	0.425737	Chordata			FALSE
Xt_pum2;Dr_pum2	Xt_pum2;Dr_pum1	0	0.417684	0.417684	Chordata	Dr_Dorsal organizer;Dr_Endoderm;Dr_Involuting marginal zone;Dr_Neuroectoderm;Dr_Non-neural ectoderm;Dr_Notochord	Xt_Endoderm;Xt_Involuting marginal zone;Xt_Neuroectoderm;Xt_Non-neural ectoderm;Xt_Notochord;Xt_Spemann organizer	FALSE
Dr_zc3h12b;Xt_zc3h12b	Dr_zc3h12b;Xt_zc3h12c	0.00588191	0.417821	0.411939	Chordata	Dr_Eye primordium;Dr_Forebrain/midbrain;Dr_Hindbrain;Dr_Neuron;Dr_Tailbud	Xt_Forebrain/midbrain;Xt_Hindbrain;Xt_Neuron;Xt_Optic	TRUE
Xt_LOC101734319;Dr_colgalt1	Xt_LOC101734319;Dr_cercam	0	0.402988	0.402988	Chordata	Dr_Notochord	Xt_Notochord	FALSE
Xt_LOC101734319;Dr_colgalt2	Xt_LOC101734319;Dr_cercam	0	0.402988	0.402988	Chordata	Dr_Notochord	Xt_Notochord	FALSE
Xt_LOC101734319;Dr_si:ch211-114l13.7	Xt_LOC101734319;Dr_cercam	0	0.402988	0.402988	Chordata	Dr_Notochord	Xt_Notochord	TRUE
Xt_qki;Dr_qkib	Xt_qki;Dr_qkia	0.0170933	0.416066	0.398972	Chordata	Dr_Endothelial;Dr_Intermediate mesoderm;Dr_Notochord;Dr_Presomitic mesoderm;Dr_Skeletal muscle	Xt_Endothelial;Xt_Intermediate mesoderm;Xt_Notochord;Xt_Presomitic mesoderm;Xt_Skeletal muscle	FALSE
Xt_wiz-like;Dr_si:ch211-194b1.1	Xt_wiz-like;Dr_si:dkey-217d24.6	0.00820496	0.380019	0.371814	Chordata	Dr_Blastula;Dr_Neuroectoderm	Xt_Blastula;Xt_Neuroectoderm;Xt_Non-neural ectoderm	FALSE
Xt_arid3a;Dr_arid3a	Xt_arid3a;Dr_arid3b	0	0.371217	0.371217	Chordata	Dr_Endoderm;Dr_Epidermal progenitor;Dr_Ionocyte;Dr_Placodal area;Dr_Presomitic mesoderm;Dr_Rare epidermal subtypes;Dr_Rohon-beard neuron;Dr_Tailbud	Xt_Epidermal progenitor;Xt_Ionocyte;Xt_Placodal area;Xt_Presomitic mesoderm;Xt_Rohon-beard neuron;Xt_Skeletal muscle;Xt_Small secretory cells;Xt_Tailbud	FALSE
Xt_arid3a;Dr_arid3c	Xt_arid3a;Dr_arid3b	0	0.371217	0.371217	Chordata	Dr_Endoderm;Dr_Epidermal progenitor;Dr_Ionocyte;Dr_Placodal area;Dr_Presomitic mesoderm;Dr_Rare epidermal subtypes;Dr_Rohon-beard neuron;Dr_Tailbud	Xt_Epidermal progenitor;Xt_Ionocyte;Xt_Placodal area;Xt_Presomitic mesoderm;Xt_Rohon-beard neuron;Xt_Skeletal muscle;Xt_Small secretory cells;Xt_Tailbud	FALSE
Dr_zar1;Xt_zar1	Dr_zar1;Xt_LOC100486817-like	0.035583	0.396715	0.361132	Chordata	Dr_Blastula	Xt_Blastula	FALSE
Xt_ube2e3;Dr_ube2e2	Xt_ube2e3;Dr_ube2e1	0	0.3609	0.3609	Chordata			FALSE
Dr_arid3b;Xt_arid3b	Dr_arid3b;Xt_arid3a	0.0131863	0.371217	0.358031	Chordata	Dr_Endoderm;Dr_Epidermal progenitor;Dr_Ionocyte;Dr_Placodal area;Dr_Presomitic mesoderm;Dr_Rare epidermal subtypes;Dr_Rohon-beard neuron;Dr_Tailbud	Xt_Epidermal progenitor;Xt_Ionocyte;Xt_Placodal area;Xt_Presomitic mesoderm;Xt_Rohon-beard neuron;Xt_Skeletal muscle;Xt_Small secretory cells;Xt_Tailbud	FALSE
Dr_hnrnpul1;Xt_hnrnpul1	Dr_hnrnpul1;Xt_hnrnpu	0.164378	0.519318	0.354941	Chordata	Dr_Dorsal organizer;Dr_Eye primordium;Dr_Forebrain/midbrain;Dr_Intermediate mesoderm;Dr_Neuroectoderm;Dr_Non-neural ectoderm;Dr_Presomitic mesoderm;Dr_Tailbud	Xt_Eye primordium;Xt_Forebrain/midbrain;Xt_Hindbrain;Xt_Neuroectoderm;Xt_Non-neural ectoderm;Xt_Presomitic mesoderm;Xt_Spemann organizer;Xt_Tailbud	FALSE
Xt_srsf5;Dr_srsf5b	Xt_srsf5;Dr_srsf6b	0	0.353315	0.353315	Chordata			FALSE
Dr_mknk2a;Xt_mknk2	Dr_mknk2a;Xt_LOC101733835	0	0.353289	0.353289	Chordata			FALSE
Xt_ube2e3;Dr_ube2e3	Xt_ube2e3;Dr_ube2e1	0.00935975	0.3609	0.35154	Chordata			FALSE
Dr_prdm16;Xt_prdm16	Dr_prdm16;Xt_mecom	0	0.347941	0.347941	Chordata			FALSE
Dr_pygb;Xt_pygm	Dr_pygb;Xt_pygl	0	0.333712	0.333712	Chordata	Dr_Macrophage	Xt_Myeloid progenitors	FALSE
Xt_pygl;Dr_pygl	Xt_pygl;Dr_pygb	0	0.333712	0.333712	Chordata	Dr_Macrophage	Xt_Myeloid progenitors	FALSE
Dr_ribc2;Xt_ribc2	Dr_ribc2;Xt_ribc1	0.452756	0.782544	0.329788	Chordata	Dr_Notoplate	Xt_Notoplate	FALSE
Xt_slc5a1.2;Dr_slc5a1	Xt_slc5a1.2;Dr_slc5a2	0	0.32906	0.32906	Chordata			FALSE
Dr_slc5a2;Xt_slc5a2	Dr_slc5a2;Xt_slc5a1.2	0	0.32906	0.32906	Chordata			FALSE
Dr_pygb;Xt_LOC100491051-like	Dr_pygb;Xt_pygl	0.00544345	0.333712	0.328269	Chordata	Dr_Macrophage	Xt_Myeloid progenitors	FALSE
Dr_pou4f1;Xt_LOC100488759	Dr_pou4f1;Xt_pou4f1.2	0	0.326071	0.326071	Chordata	Dr_Rohon-beard neuron	Xt_Neuron;Xt_Rohon-beard neuron	TRUE
Xt_pou4f1.2;Dr_pou4f3	Xt_pou4f1.2;Dr_pou4f1	0	0.326071	0.326071	Chordata	Dr_Rohon-beard neuron	Xt_Neuron;Xt_Rohon-beard neuron	TRUE
Xt_LOC100489980-like;Dr_cyp26c1	Xt_LOC100489980-like;Dr_cyp26b1	0.332688	0.658564	0.325876	Chordata	Dr_Hindbrain	Xt_Hindbrain	FALSE
Dr_srsf4;Xt_srsf4-like	Dr_srsf4;Xt_srsf6	0.298249	0.620807	0.322558	Chordata	Dr_Dorsal organizer;Dr_Endoderm;Dr_Involuting marginal zone;Dr_Neuroectoderm;Dr_Non-neural ectoderm;Dr_Notochord;Dr_Tailbud	Xt_Endoderm;Xt_Hindbrain;Xt_Involuting marginal zone;Xt_Neuroectoderm;Xt_Non-neural ectoderm;Xt_Spemann organizer	FALSE
Xt_twf2;Dr_twf2b	Xt_twf2;Dr_twf1a	0	0.320277	0.320277	Chordata			FALSE
Dr_ccnt1;Xt_ccnt1	Dr_ccnt1;Xt_ccnt2	0	0.319348	0.319348	Chordata			FALSE
Xt_ccnt2;Dr_ccnt2a	Xt_ccnt2;Dr_ccnt1	0	0.319348	0.319348	Chordata			FALSE
Xt_pfkfb3;Dr_pfkfb3	Xt_pfkfb3;Dr_pfkfb4l	0	0.319101	0.319101	Chordata	Dr_Involuting marginal zone;Dr_Neuroectoderm;Dr_Neuron;Dr_Non-neural ectoderm	Xt_Involuting marginal zone;Xt_Neuroectoderm;Xt_Neuron;Xt_Non-neural ectoderm	FALSE
Xt_stag1;Dr_stag1a	Xt_stag1;Dr_stag2b	0.0238646	0.339126	0.315262	Chordata	Dr_Involuting marginal zone;Dr_Neuroectoderm;Dr_Non-neural ectoderm;Dr_Tailbud	Xt_Hindbrain;Xt_Involuting marginal zone;Xt_Neuroectoderm;Xt_Non-neural ectoderm	FALSE
Xt_pim3;Dr_pim1	Xt_pim3;Dr_pim3	0	0.31404	0.31404	Chordata	Dr_Blastula;Dr_Rohon-beard neuron	Xt_Blastula;Xt_Neuron	FALSE
Dr_kdm2a;Xt_kdm2a	Dr_kdm2a;Xt_Xetrov90003142m	0	0.312066	0.312066	Chordata			FALSE
Xt_Xetrov90003142m;Dr_kdm2bb	Xt_Xetrov90003142m;Dr_kdm2a	0	0.312066	0.312066	Chordata			FALSE
Xt_Xetrov90003142m;Dr_kdm2b	Xt_Xetrov90003142m;Dr_kdm2a	0	0.312066	0.312066	Chordata			FALSE
Xt_kat7;Dr_kat7a	Xt_kat7;Dr_kat7b	0	0.311175	0.311175	Chordata			FALSE
Xt_nrcam;Dr_LOC103909644	Xt_nrcam;Dr_chl1b	0	0.309875	0.309875	Chordata	Dr_Forebrain/midbrain;Dr_Hindbrain	Xt_Hindbrain	TRUE
Dr_chl1b;Xt_LOC101735183	Dr_chl1b;Xt_nrcam	0	0.309875	0.309875	Chordata	Dr_Forebrain/midbrain;Dr_Hindbrain	Xt_Hindbrain	TRUE
Dr_chl1b;Xt_Xetrov90029672m	Dr_chl1b;Xt_nrcam	0	0.309875	0.309875	Chordata	Dr_Forebrain/midbrain;Dr_Hindbrain	Xt_Hindbrain	TRUE
Dr_chl1b;Xt_Xetrov90030664m	Dr_chl1b;Xt_nrcam	0	0.309875	0.309875	Chordata	Dr_Forebrain/midbrain;Dr_Hindbrain	Xt_Hindbrain	TRUE
Xt_nrcam;Dr_nrcama	Xt_nrcam;Dr_chl1b	0	0.309875	0.309875	Chordata	Dr_Forebrain/midbrain;Dr_Hindbrain	Xt_Hindbrain	FALSE
Xt_nrcam;Dr_nrcamb	Xt_nrcam;Dr_chl1b	0	0.309875	0.309875	Chordata	Dr_Forebrain/midbrain;Dr_Hindbrain	Xt_Hindbrain	TRUE
Xt_rps6ka1;Dr_rps6ka1	Xt_rps6ka1;Dr_rps6ka3a	0	0.309799	0.309799	Chordata	Dr_Blastula;Dr_Involuting marginal zone;Dr_Macrophage	Xt_Blastula;Xt_Involuting marginal zone;Xt_Myeloid progenitors	FALSE
Dr_rps6ka3a;Xt_LOC100496161	Dr_rps6ka3a;Xt_rps6ka1	0	0.309799	0.309799	Chordata	Dr_Blastula;Dr_Involuting marginal zone;Dr_Macrophage	Xt_Blastula;Xt_Involuting marginal zone;Xt_Myeloid progenitors	FALSE
Xt_fxr1;Dr_fxr1	Xt_fxr1;Dr_fxr2	0.422893	0.73261	0.309717	Chordata	Dr_Dorsal organizer;Dr_Involuting marginal zone;Dr_Neuroectoderm;Dr_Non-neural ectoderm;Dr_Notochord;Dr_Presomitic mesoderm;Dr_Skeletal muscle	Xt_Involuting marginal zone;Xt_Neuroectoderm;Xt_Non-neural ectoderm;Xt_Presomitic mesoderm;Xt_Skeletal muscle;Xt_Spemann organizer	FALSE
Xt_pfkfb3;Dr_pfkfb3	Xt_pfkfb3;Dr_pfkfb4b	0	0.308469	0.308469	Chordata	Dr_Involuting marginal zone;Dr_Neuroectoderm;Dr_Non-neural ectoderm	Xt_Involuting marginal zone;Xt_Neuroectoderm;Xt_Non-neural ectoderm	FALSE
Xt_syncrip;Dr_syncripl	Xt_syncrip;Dr_hnrnpr	0.290544	0.598846	0.308301	Chordata	Dr_Dorsal organizer;Dr_Involuting marginal zone;Dr_Neuroectoderm;Dr_Non-neural ectoderm	Xt_Involuting marginal zone;Xt_Neuroectoderm;Xt_Non-neural ectoderm;Xt_Spemann organizer	FALSE
Xt_actc1;Dr_acta2	Xt_actc1;Dr_actc1b	0.49768	0.803799	0.306119	Chordata	Dr_Presomitic mesoderm;Dr_Skeletal muscle	Xt_Presomitic mesoderm;Xt_Skeletal muscle	FALSE
Xt_zcchc6;Dr_zcchc6	Xt_zcchc6;Dr_LOC795358	0.135158	0.439507	0.304349	Chordata	Dr_Blastula;Dr_Involuting marginal zone;Dr_Neuroectoderm;Dr_Non-neural ectoderm	Xt_Blastula;Xt_Involuting marginal zone;Xt_Neuroectoderm;Xt_Non-neural ectoderm	FALSE
Dr_plod2;Xt_plod2-like	Dr_plod2;Xt_Xetrov90018273m	0.220513	0.524259	0.303745	Chordata	Dr_Notochord;Dr_Presomitic mesoderm	Xt_Notochord;Xt_Skeletal muscle;Xt_Spemann organizer	FALSE
Xt_act3;Dr_acta2	Xt_act3;Dr_actc1b	0.640838	0.944169	0.303331	Chordata	Dr_Presomitic mesoderm;Dr_Skeletal muscle	Xt_Skeletal muscle	FALSE
Dr_cyp26b1;Xt_cyp26b1	Dr_cyp26b1;Xt_LOC100489980-like	0.357086	0.658564	0.301478	Chordata	Dr_Hindbrain	Xt_Hindbrain	FALSE
Xt_kdr;Dr_kdr	Xt_kdr;Dr_kdrl	0	0.301466	0.301466	Chordata			FALSE
Dr_LOC103909603;Xt_Xetrov90013012m	Dr_LOC103909603;Xt_capn1-like.1	0	0.749932	0.749932	Bilateria	Dr_Epidermal progenitor;Dr_Ionocyte;Dr_Placodal area;Dr_Rare epidermal subtypes;Dr_Secretory epidermal	Xt_Cement gland primordium;Xt_Epidermal progenitor;Xt_Goblet cell;Xt_Hatching gland;Xt_Ionocyte;Xt_Small secretory cells	TRUE
Xt_capn1-like.1;Dr_capn1a	Xt_capn1-like.1;Dr_LOC103909603	0	0.749932	0.749932	Bilateria	Dr_Epidermal progenitor;Dr_Ionocyte;Dr_Placodal area;Dr_Rare epidermal subtypes;Dr_Secretory epidermal	Xt_Cement gland primordium;Xt_Epidermal progenitor;Xt_Goblet cell;Xt_Hatching gland;Xt_Ionocyte;Xt_Small secretory cells	FALSE
Dr_LOC103909603;Xt_capn2	Dr_LOC103909603;Xt_capn1-like.1	0	0.749932	0.749932	Bilateria	Dr_Epidermal progenitor;Dr_Ionocyte;Dr_Placodal area;Dr_Rare epidermal subtypes;Dr_Secretory epidermal	Xt_Cement gland primordium;Xt_Epidermal progenitor;Xt_Goblet cell;Xt_Hatching gland;Xt_Ionocyte;Xt_Small secretory cells	FALSE
Xt_capn1-like.1;Dr_zgc:55262	Xt_capn1-like.1;Dr_LOC103909603	0	0.749932	0.749932	Bilateria	Dr_Epidermal progenitor;Dr_Ionocyte;Dr_Placodal area;Dr_Rare epidermal subtypes;Dr_Secretory epidermal	Xt_Cement gland primordium;Xt_Epidermal progenitor;Xt_Goblet cell;Xt_Hatching gland;Xt_Ionocyte;Xt_Small secretory cells	FALSE
Dr_LOC103909603;Xt_capn8	Dr_LOC103909603;Xt_capn1-like.1	0	0.749932	0.749932	Bilateria	Dr_Epidermal progenitor;Dr_Ionocyte;Dr_Placodal area;Dr_Rare epidermal subtypes;Dr_Secretory epidermal	Xt_Cement gland primordium;Xt_Epidermal progenitor;Xt_Goblet cell;Xt_Hatching gland;Xt_Ionocyte;Xt_Small secretory cells	FALSE
Dr_LOC103909603;Xt_LOC101730581	Dr_LOC103909603;Xt_capn1-like.1	0	0.749932	0.749932	Bilateria	Dr_Epidermal progenitor;Dr_Ionocyte;Dr_Placodal area;Dr_Rare epidermal subtypes;Dr_Secretory epidermal	Xt_Cement gland primordium;Xt_Epidermal progenitor;Xt_Goblet cell;Xt_Hatching gland;Xt_Ionocyte;Xt_Small secretory cells	TRUE
Xt_capn1-like.1;Dr_si:dkeyp-50d11.2	Xt_capn1-like.1;Dr_LOC103909603	0	0.749932	0.749932	Bilateria	Dr_Epidermal progenitor;Dr_Ionocyte;Dr_Placodal area;Dr_Rare epidermal subtypes;Dr_Secretory epidermal	Xt_Cement gland primordium;Xt_Epidermal progenitor;Xt_Goblet cell;Xt_Hatching gland;Xt_Ionocyte;Xt_Small secretory cells	FALSE
Dr_LOC103909603;Xt_LOC100497284-like	Dr_LOC103909603;Xt_capn1-like.1	0	0.749932	0.749932	Bilateria	Dr_Epidermal progenitor;Dr_Ionocyte;Dr_Placodal area;Dr_Rare epidermal subtypes;Dr_Secretory epidermal	Xt_Cement gland primordium;Xt_Epidermal progenitor;Xt_Goblet cell;Xt_Hatching gland;Xt_Ionocyte;Xt_Small secretory cells	TRUE
Dr_LOC103909603;Xt_LOC101731595	Dr_LOC103909603;Xt_capn1-like.1	0	0.749932	0.749932	Bilateria	Dr_Epidermal progenitor;Dr_Ionocyte;Dr_Placodal area;Dr_Rare epidermal subtypes;Dr_Secretory epidermal	Xt_Cement gland primordium;Xt_Epidermal progenitor;Xt_Goblet cell;Xt_Hatching gland;Xt_Ionocyte;Xt_Small secretory cells	TRUE
Dr_capn8;Xt_Xetrov90013012m	Dr_capn8;Xt_capn1-like.1	0	0.74473	0.74473	Bilateria	Dr_Epidermal progenitor;Dr_Hatching gland;Dr_Ionocyte;Dr_Placodal area;Dr_Rare epidermal subtypes;Dr_Secretory epidermal	Xt_Cement gland primordium;Xt_Epidermal progenitor;Xt_Goblet cell;Xt_Hatching gland;Xt_Ionocyte;Xt_Small secretory cells	TRUE
Xt_capn1-like.1;Dr_zgc:55262	Xt_capn1-like.1;Dr_capn8	0	0.74473	0.74473	Bilateria	Dr_Epidermal progenitor;Dr_Hatching gland;Dr_Ionocyte;Dr_Placodal area;Dr_Rare epidermal subtypes;Dr_Secretory epidermal	Xt_Cement gland primordium;Xt_Epidermal progenitor;Xt_Goblet cell;Xt_Hatching gland;Xt_Ionocyte;Xt_Small secretory cells	FALSE
Xt_capn1-like.1;Dr_si:dkeyp-50d11.2	Xt_capn1-like.1;Dr_capn8	0	0.74473	0.74473	Bilateria	Dr_Epidermal progenitor;Dr_Hatching gland;Dr_Ionocyte;Dr_Placodal area;Dr_Rare epidermal subtypes;Dr_Secretory epidermal	Xt_Cement gland primordium;Xt_Epidermal progenitor;Xt_Goblet cell;Xt_Hatching gland;Xt_Ionocyte;Xt_Small secretory cells	FALSE
Dr_capn8;Xt_LOC100497284-like	Dr_capn8;Xt_capn1-like.1	0	0.74473	0.74473	Bilateria	Dr_Epidermal progenitor;Dr_Hatching gland;Dr_Ionocyte;Dr_Placodal area;Dr_Rare epidermal subtypes;Dr_Secretory epidermal	Xt_Cement gland primordium;Xt_Epidermal progenitor;Xt_Goblet cell;Xt_Hatching gland;Xt_Ionocyte;Xt_Small secretory cells	TRUE
Dr_capn8;Xt_LOC101730581	Dr_capn8;Xt_capn1-like.1	0	0.74473	0.74473	Bilateria	Dr_Epidermal progenitor;Dr_Hatching gland;Dr_Ionocyte;Dr_Placodal area;Dr_Rare epidermal subtypes;Dr_Secretory epidermal	Xt_Cement gland primordium;Xt_Epidermal progenitor;Xt_Goblet cell;Xt_Hatching gland;Xt_Ionocyte;Xt_Small secretory cells	TRUE
Xt_capn1-like.1;Dr_capn1a	Xt_capn1-like.1;Dr_capn8	0	0.74473	0.74473	Bilateria	Dr_Epidermal progenitor;Dr_Hatching gland;Dr_Ionocyte;Dr_Placodal area;Dr_Rare epidermal subtypes;Dr_Secretory epidermal	Xt_Cement gland primordium;Xt_Epidermal progenitor;Xt_Goblet cell;Xt_Hatching gland;Xt_Ionocyte;Xt_Small secretory cells	FALSE
Dr_capn8;Xt_capn8	Dr_capn8;Xt_capn1-like.1	0	0.74473	0.74473	Bilateria	Dr_Epidermal progenitor;Dr_Hatching gland;Dr_Ionocyte;Dr_Placodal area;Dr_Rare epidermal subtypes;Dr_Secretory epidermal	Xt_Cement gland primordium;Xt_Epidermal progenitor;Xt_Goblet cell;Xt_Hatching gland;Xt_Ionocyte;Xt_Small secretory cells	FALSE
Dr_capn8;Xt_LOC101731595	Dr_capn8;Xt_capn1-like.1	0	0.74473	0.74473	Bilateria	Dr_Epidermal progenitor;Dr_Hatching gland;Dr_Ionocyte;Dr_Placodal area;Dr_Rare epidermal subtypes;Dr_Secretory epidermal	Xt_Cement gland primordium;Xt_Epidermal progenitor;Xt_Goblet cell;Xt_Hatching gland;Xt_Ionocyte;Xt_Small secretory cells	TRUE
Dr_capn8;Xt_capn2	Dr_capn8;Xt_capn1-like.1	0	0.74473	0.74473	Bilateria	Dr_Epidermal progenitor;Dr_Hatching gland;Dr_Ionocyte;Dr_Placodal area;Dr_Rare epidermal subtypes;Dr_Secretory epidermal	Xt_Cement gland primordium;Xt_Epidermal progenitor;Xt_Goblet cell;Xt_Hatching gland;Xt_Ionocyte;Xt_Small secretory cells	FALSE
Dr_capn2l;Xt_capn2.2	Dr_capn2l;Xt_capn9	0	0.687932	0.687932	Bilateria	Dr_Ionocyte;Dr_Rare epidermal subtypes;Dr_Secretory epidermal	Xt_Cement gland primordium;Xt_Goblet cell;Xt_Hatching gland;Xt_Ionocyte	FALSE
Dr_capn2l;Xt_LOC101733523	Dr_capn2l;Xt_capn9	0	0.687932	0.687932	Bilateria	Dr_Ionocyte;Dr_Rare epidermal subtypes;Dr_Secretory epidermal	Xt_Cement gland primordium;Xt_Goblet cell;Xt_Hatching gland;Xt_Ionocyte	TRUE
Xt_nt5c2;Dr_nt5c2b	Xt_nt5c2;Dr_nt5c2l1	0	0.674852	0.674852	Bilateria	Dr_Blood	Xt_Blood	FALSE
Xt_nt5c2;Dr_nt5c2a	Xt_nt5c2;Dr_nt5c2l1	0	0.674852	0.674852	Bilateria	Dr_Blood	Xt_Blood	FALSE
Dr_nt5c2l1;Xt_LOC100496104	Dr_nt5c2l1;Xt_nt5c2	0	0.674852	0.674852	Bilateria	Dr_Blood	Xt_Blood	TRUE
Xt_capn1-like.1;Dr_capn1b	Xt_capn1-like.1;Dr_LOC103909603	0.0874022	0.749932	0.662529	Bilateria	Dr_Epidermal progenitor;Dr_Ionocyte;Dr_Placodal area;Dr_Rare epidermal subtypes;Dr_Secretory epidermal	Xt_Cement gland primordium;Xt_Epidermal progenitor;Xt_Goblet cell;Xt_Hatching gland;Xt_Ionocyte;Xt_Small secretory cells	FALSE
Xt_LOC100490289-like;Dr_si:ch73-199e17.1	Xt_LOC100490289-like;Dr_LOC795591	0	0.65856	0.65856	Bilateria			FALSE
Xt_LOC100490289-like;Dr_tuba2	Xt_LOC100490289-like;Dr_LOC795591	0	0.65856	0.65856	Bilateria			FALSE
Xt_LOC100490289-like;Dr_tuba7l	Xt_LOC100490289-like;Dr_LOC795591	0	0.65856	0.65856	Bilateria			FALSE
Xt_LOC100490289-like;Dr_tuba8l4	Xt_LOC100490289-like;Dr_LOC795591	0	0.65856	0.65856	Bilateria			FALSE
Xt_LOC100490289-like;Dr_tuba1b	Xt_LOC100490289-like;Dr_LOC795591	0	0.65856	0.65856	Bilateria			FALSE
Xt_LOC100490289-like;Dr_tuba8l3	Xt_LOC100490289-like;Dr_LOC795591	0	0.65856	0.65856	Bilateria			FALSE
Xt_capn1-like.1;Dr_capn1b	Xt_capn1-like.1;Dr_capn8	0.0874022	0.74473	0.657328	Bilateria	Dr_Epidermal progenitor;Dr_Hatching gland;Dr_Ionocyte;Dr_Placodal area;Dr_Rare epidermal subtypes;Dr_Secretory epidermal	Xt_Cement gland primordium;Xt_Epidermal progenitor;Xt_Goblet cell;Xt_Hatching gland;Xt_Ionocyte;Xt_Small secretory cells	FALSE
Dr_smyhc1;Xt_myh6	Dr_smyhc1;Xt_myh4	0	0.650993	0.650993	Bilateria	Dr_Skeletal muscle	Xt_Skeletal muscle	FALSE
Xt_myh4;Dr_wu:fd14a01	Xt_myh4;Dr_smyhc1	0	0.650993	0.650993	Bilateria	Dr_Skeletal muscle	Xt_Skeletal muscle	FALSE
Xt_myh4;Dr_myhb	Xt_myh4;Dr_smyhc1	0	0.650993	0.650993	Bilateria	Dr_Skeletal muscle	Xt_Skeletal muscle	FALSE
Xt_myh4;Dr_LOC100537594	Xt_myh4;Dr_smyhc1	0	0.650993	0.650993	Bilateria	Dr_Skeletal muscle	Xt_Skeletal muscle	FALSE
Xt_myh4;Dr_zgc:66156	Xt_myh4;Dr_smyhc1	0	0.650993	0.650993	Bilateria	Dr_Skeletal muscle	Xt_Skeletal muscle	TRUE
Dr_smyhc1;Xt_Xetrov90025695m	Dr_smyhc1;Xt_myh4	0	0.650993	0.650993	Bilateria	Dr_Skeletal muscle	Xt_Skeletal muscle	FALSE
Dr_smyhc1;Xt_myh7	Dr_smyhc1;Xt_myh4	0	0.650993	0.650993	Bilateria	Dr_Skeletal muscle	Xt_Skeletal muscle	TRUE
Xt_LOC100497157;Dr_tuba1b	Xt_LOC100497157;Dr_LOC795591	0	0.650625	0.650625	Bilateria			FALSE
Xt_LOC100497157;Dr_tuba2	Xt_LOC100497157;Dr_LOC795591	0	0.650625	0.650625	Bilateria			FALSE
Xt_LOC100497157;Dr_tuba8l4	Xt_LOC100497157;Dr_LOC795591	0	0.650625	0.650625	Bilateria			FALSE
Xt_LOC100497157;Dr_si:ch73-199e17.1	Xt_LOC100497157;Dr_LOC795591	0	0.650625	0.650625	Bilateria			FALSE
Xt_LOC100497157;Dr_tuba8l3	Xt_LOC100497157;Dr_LOC795591	0	0.650625	0.650625	Bilateria			FALSE
Xt_LOC100497157;Dr_tuba7l	Xt_LOC100497157;Dr_LOC795591	0	0.650625	0.650625	Bilateria			FALSE
Xt_Xetrov90024523m;Dr_tuba8l3	Xt_Xetrov90024523m;Dr_LOC795591	0	0.650598	0.650598	Bilateria			FALSE
Xt_Xetrov90024523m;Dr_tuba8l4	Xt_Xetrov90024523m;Dr_LOC795591	0	0.650598	0.650598	Bilateria			FALSE
Xt_Xetrov90024523m;Dr_tuba7l	Xt_Xetrov90024523m;Dr_LOC795591	0	0.650598	0.650598	Bilateria			FALSE
Xt_Xetrov90024523m;Dr_tuba2	Xt_Xetrov90024523m;Dr_LOC795591	0	0.650598	0.650598	Bilateria			FALSE
Xt_Xetrov90024523m;Dr_tuba1b	Xt_Xetrov90024523m;Dr_LOC795591	0	0.650598	0.650598	Bilateria			FALSE
Xt_Xetrov90024523m;Dr_si:ch73-199e17.1	Xt_Xetrov90024523m;Dr_LOC795591	0	0.650598	0.650598	Bilateria			FALSE
Xt_LOC100490289-like;Dr_tuba1c	Xt_LOC100490289-like;Dr_LOC795591	0.0165735	0.65856	0.641986	Bilateria			FALSE
Xt_Xetrov90024523m;Dr_tuba1c	Xt_Xetrov90024523m;Dr_LOC795591	0.0113409	0.650598	0.639257	Bilateria			FALSE
Xt_LOC100497157;Dr_tuba1c	Xt_LOC100497157;Dr_LOC795591	0.0156045	0.650625	0.63502	Bilateria			FALSE
Xt_isl1;Dr_isl1l	Xt_isl1;Dr_isl2b	0	0.62776	0.62776	Bilateria	Dr_Rohon-beard neuron	Xt_Neuron;Xt_Rohon-beard neuron	FALSE
Xt_LOC100497528;Dr_si:ch73-199e17.1	Xt_LOC100497528;Dr_LOC795591	0	0.617371	0.617371	Bilateria			FALSE
Xt_LOC100497528;Dr_tuba8l3	Xt_LOC100497528;Dr_LOC795591	0	0.617371	0.617371	Bilateria			FALSE
Xt_LOC100497528;Dr_tuba2	Xt_LOC100497528;Dr_LOC795591	0	0.617371	0.617371	Bilateria			FALSE
Xt_LOC100497528;Dr_tuba7l	Xt_LOC100497528;Dr_LOC795591	0	0.617371	0.617371	Bilateria			FALSE
Xt_LOC100497528;Dr_tuba8l4	Xt_LOC100497528;Dr_LOC795591	0	0.617371	0.617371	Bilateria			FALSE
Xt_gnai1;Dr_gnai3	Xt_gnai1;Dr_gnaia	0	0.612877	0.612877	Bilateria	Dr_Dorsal organizer;Dr_Endoderm;Dr_Involuting marginal zone;Dr_Neuroectoderm;Dr_Non-neural ectoderm;Dr_Notochord;Dr_Presomitic mesoderm	Xt_Endoderm;Xt_Involuting marginal zone;Xt_Neuroectoderm;Xt_Non-neural ectoderm;Xt_Presomitic mesoderm;Xt_Spemann organizer	FALSE
Dr_LOC103909603;Xt_Xetrov90013012m	Dr_LOC103909603;Xt_capn9	0	0.609339	0.609339	Bilateria	Dr_Ionocyte;Dr_Rare epidermal subtypes;Dr_Secretory epidermal	Xt_Cement gland primordium;Xt_Goblet cell;Xt_Hatching gland;Xt_Ionocyte	TRUE
Dr_LOC103909603;Xt_LOC101731595	Dr_LOC103909603;Xt_capn9	0	0.609339	0.609339	Bilateria	Dr_Ionocyte;Dr_Rare epidermal subtypes;Dr_Secretory epidermal	Xt_Cement gland primordium;Xt_Goblet cell;Xt_Hatching gland;Xt_Ionocyte	TRUE
Dr_LOC103909603;Xt_LOC100497284-like	Dr_LOC103909603;Xt_capn9	0	0.609339	0.609339	Bilateria	Dr_Ionocyte;Dr_Rare epidermal subtypes;Dr_Secretory epidermal	Xt_Cement gland primordium;Xt_Goblet cell;Xt_Hatching gland;Xt_Ionocyte	TRUE
Dr_LOC103909603;Xt_capn2	Dr_LOC103909603;Xt_capn9	0	0.609339	0.609339	Bilateria	Dr_Ionocyte;Dr_Rare epidermal subtypes;Dr_Secretory epidermal	Xt_Cement gland primordium;Xt_Goblet cell;Xt_Hatching gland;Xt_Ionocyte	FALSE
Dr_LOC103909603;Xt_LOC101730581	Dr_LOC103909603;Xt_capn9	0	0.609339	0.609339	Bilateria	Dr_Ionocyte;Dr_Rare epidermal subtypes;Dr_Secretory epidermal	Xt_Cement gland primordium;Xt_Goblet cell;Xt_Hatching gland;Xt_Ionocyte	TRUE
Dr_LOC103909603;Xt_capn8	Dr_LOC103909603;Xt_capn9	0	0.609339	0.609339	Bilateria	Dr_Ionocyte;Dr_Rare epidermal subtypes;Dr_Secretory epidermal	Xt_Cement gland primordium;Xt_Goblet cell;Xt_Hatching gland;Xt_Ionocyte	FALSE
Dr_srsf5a;Xt_krt5.1-like.2	Dr_srsf5a;Xt_srsf6	0	0.608072	0.608072	Bilateria	Dr_Dorsal organizer;Dr_Endoderm;Dr_Involuting marginal zone;Dr_Neuroectoderm;Dr_Non-neural ectoderm	Xt_Endoderm;Xt_Involuting marginal zone;Xt_Neuroectoderm;Xt_Non-neural ectoderm;Xt_Spemann organizer	FALSE
Xt_gata2;Dr_gata2b	Xt_gata2;Dr_gata3	0	0.601593	0.601593	Bilateria	Dr_Epidermal progenitor;Dr_Ionocyte;Dr_Non-neural ectoderm;Dr_Placodal area;Dr_Rare epidermal subtypes;Dr_Secretory epidermal	Xt_Cement gland primordium;Xt_Epidermal progenitor;Xt_Goblet cell;Xt_Ionocyte;Xt_Non-neural ectoderm;Xt_Placodal area	FALSE
Xt_LOC100490289-like;Dr_tuba1a	Xt_LOC100490289-like;Dr_LOC795591	0.0633228	0.65856	0.595237	Bilateria			FALSE
Xt_myh8-like;Dr_LOC100537594	Xt_myh8-like;Dr_smyhc1	0	0.593599	0.593599	Bilateria	Dr_Skeletal muscle	Xt_Skeletal muscle	FALSE
Xt_myh8-like;Dr_wu:fd14a01	Xt_myh8-like;Dr_smyhc1	0	0.593599	0.593599	Bilateria	Dr_Skeletal muscle	Xt_Skeletal muscle	FALSE
Dr_smyhc1;Xt_myh7	Dr_smyhc1;Xt_myh8-like	0	0.593599	0.593599	Bilateria	Dr_Skeletal muscle	Xt_Skeletal muscle	TRUE
Xt_myh8-like;Dr_zgc:66156	Xt_myh8-like;Dr_smyhc1	0	0.593599	0.593599	Bilateria	Dr_Skeletal muscle	Xt_Skeletal muscle	TRUE
Xt_myh8-like;Dr_myhb	Xt_myh8-like;Dr_smyhc1	0	0.593599	0.593599	Bilateria	Dr_Skeletal muscle	Xt_Skeletal muscle	FALSE
Dr_smyhc1;Xt_Xetrov90025695m	Dr_smyhc1;Xt_myh8-like	0	0.593599	0.593599	Bilateria	Dr_Skeletal muscle	Xt_Skeletal muscle	FALSE
Dr_smyhc1;Xt_myh6	Dr_smyhc1;Xt_myh8-like	0	0.593599	0.593599	Bilateria	Dr_Skeletal muscle	Xt_Skeletal muscle	FALSE
Xt_Xetrov90024523m;Dr_tuba1a	Xt_Xetrov90024523m;Dr_LOC795591	0.0570751	0.650598	0.593523	Bilateria			FALSE
Xt_LOC100497157;Dr_tuba1a	Xt_LOC100497157;Dr_LOC795591	0.0623103	0.650625	0.588314	Bilateria			FALSE
Xt_LOC100497528;Dr_tuba1b	Xt_LOC100497528;Dr_LOC795591	0.0299417	0.617371	0.587429	Bilateria			FALSE
Dr_itga6b;Xt_itga6	Dr_itga6b;Xt_itga3	0.00364089	0.589873	0.586232	Bilateria	Dr_Epidermal progenitor;Dr_Placodal area	Xt_Epidermal progenitor;Xt_Placodal area	FALSE
Dr_elovl1b;Xt_elovl1	Dr_elovl1b;Xt_elovl7	0	0.574335	0.574335	Bilateria	Dr_Endoderm;Dr_Ionocyte;Dr_Rare epidermal subtypes	Xt_Goblet cell;Xt_Hatching gland;Xt_Ionocyte;Xt_Small secretory cells	FALSE
Xt_gnai1;Dr_gnai1	Xt_gnai1;Dr_gnaia	0.0415895	0.612877	0.571288	Bilateria	Dr_Dorsal organizer;Dr_Endoderm;Dr_Involuting marginal zone;Dr_Neuroectoderm;Dr_Non-neural ectoderm;Dr_Notochord;Dr_Presomitic mesoderm	Xt_Endoderm;Xt_Involuting marginal zone;Xt_Neuroectoderm;Xt_Non-neural ectoderm;Xt_Presomitic mesoderm;Xt_Spemann organizer	FALSE
Xt_LOC100497528;Dr_tuba1c	Xt_LOC100497528;Dr_LOC795591	0.0470486	0.617371	0.570322	Bilateria			FALSE
Xt_myh4;Dr_zgc:66156	Xt_myh4;Dr_LOC103909185	0	0.549171	0.549171	Bilateria			TRUE
Dr_LOC103909185;Xt_myh7	Dr_LOC103909185;Xt_myh4	0	0.549171	0.549171	Bilateria			TRUE
Dr_LOC103909185;Xt_myh6	Dr_LOC103909185;Xt_myh4	0	0.549171	0.549171	Bilateria			TRUE
Xt_myh4;Dr_wu:fd14a01	Xt_myh4;Dr_LOC103909185	0	0.549171	0.549171	Bilateria			FALSE
Dr_LOC103909185;Xt_Xetrov90025695m	Dr_LOC103909185;Xt_myh4	0	0.549171	0.549171	Bilateria			TRUE
Xt_myh4;Dr_myhb	Xt_myh4;Dr_LOC103909185	0	0.549171	0.549171	Bilateria			FALSE
Xt_myh4;Dr_LOC100537594	Xt_myh4;Dr_LOC103909185	0	0.549171	0.549171	Bilateria			FALSE
Dr_smyhc2;Xt_myh7	Dr_smyhc2;Xt_myh4	0	0.544373	0.544373	Bilateria			TRUE
Dr_smyhc2;Xt_Xetrov90025695m	Dr_smyhc2;Xt_myh4	0	0.544373	0.544373	Bilateria			TRUE
Xt_myh4;Dr_LOC100537594	Xt_myh4;Dr_smyhc2	0	0.544373	0.544373	Bilateria			FALSE
Xt_myh4;Dr_myhb	Xt_myh4;Dr_smyhc2	0	0.544373	0.544373	Bilateria			FALSE
Xt_myh4;Dr_wu:fd14a01	Xt_myh4;Dr_smyhc2	0	0.544373	0.544373	Bilateria			FALSE
Xt_myh4;Dr_zgc:66156	Xt_myh4;Dr_smyhc2	0	0.544373	0.544373	Bilateria			TRUE
Dr_smyhc2;Xt_myh6	Dr_smyhc2;Xt_myh4	0	0.544373	0.544373	Bilateria			TRUE
Xt_zic1;Dr_LOC103910057	Xt_zic1;Dr_zic2b	0	0.543995	0.543995	Bilateria	Dr_Neuroectoderm;Dr_Tailbud	Xt_Hindbrain;Xt_Neuroectoderm	TRUE
Xt_capn1-like.1;Dr_si:dkeyp-50d11.2	Xt_capn1-like.1;Dr_capn2l	0	0.526804	0.526804	Bilateria	Dr_Ionocyte;Dr_Rare epidermal subtypes;Dr_Secretory epidermal	Xt_Cement gland primordium;Xt_Goblet cell;Xt_Hatching gland;Xt_Ionocyte;Xt_Small secretory cells	FALSE
Dr_capn2l;Xt_LOC101733523	Dr_capn2l;Xt_capn1-like.1	0	0.526804	0.526804	Bilateria	Dr_Ionocyte;Dr_Rare epidermal subtypes;Dr_Secretory epidermal	Xt_Cement gland primordium;Xt_Goblet cell;Xt_Hatching gland;Xt_Ionocyte;Xt_Small secretory cells	TRUE
Dr_capn2l;Xt_capn2.2	Dr_capn2l;Xt_capn1-like.1	0	0.526804	0.526804	Bilateria	Dr_Ionocyte;Dr_Rare epidermal subtypes;Dr_Secretory epidermal	Xt_Cement gland primordium;Xt_Goblet cell;Xt_Hatching gland;Xt_Ionocyte;Xt_Small secretory cells	FALSE
Xt_capn1-like.1;Dr_capn1a	Xt_capn1-like.1;Dr_capn2l	0	0.526804	0.526804	Bilateria	Dr_Ionocyte;Dr_Rare epidermal subtypes;Dr_Secretory epidermal	Xt_Cement gland primordium;Xt_Goblet cell;Xt_Hatching gland;Xt_Ionocyte;Xt_Small secretory cells	FALSE
Xt_capn1-like.1;Dr_zgc:55262	Xt_capn1-like.1;Dr_capn2l	0	0.526804	0.526804	Bilateria	Dr_Ionocyte;Dr_Rare epidermal subtypes;Dr_Secretory epidermal	Xt_Cement gland primordium;Xt_Goblet cell;Xt_Hatching gland;Xt_Ionocyte;Xt_Small secretory cells	FALSE
Xt_LOC100497528;Dr_tuba1a	Xt_LOC100497528;Dr_LOC795591	0.0915847	0.617371	0.525786	Bilateria			FALSE
Dr_gpm6aa;Xt_gpm6a	Dr_gpm6aa;Xt_gpm6b-like	0	0.506898	0.506898	Bilateria	Dr_Forebrain/midbrain;Dr_Hindbrain;Dr_Neuron;Dr_Optic	Xt_Eye primordium;Xt_Forebrain/midbrain;Xt_Hindbrain;Xt_Neuron;Xt_Optic	TRUE
Xt_gpm6b-like;Dr_gpm6ba	Xt_gpm6b-like;Dr_gpm6aa	0	0.506898	0.506898	Bilateria	Dr_Forebrain/midbrain;Dr_Hindbrain;Dr_Neuron;Dr_Optic	Xt_Eye primordium;Xt_Forebrain/midbrain;Xt_Hindbrain;Xt_Neuron;Xt_Optic	FALSE
Xt_gpm6b-like;Dr_gpm6bb	Xt_gpm6b-like;Dr_gpm6aa	0	0.506898	0.506898	Bilateria	Dr_Forebrain/midbrain;Dr_Hindbrain;Dr_Neuron;Dr_Optic	Xt_Eye primordium;Xt_Forebrain/midbrain;Xt_Hindbrain;Xt_Neuron;Xt_Optic	FALSE
Dr_LOC103909185;Xt_myh7	Dr_LOC103909185;Xt_myh8-like	0	0.506759	0.506759	Bilateria			TRUE
Xt_myh8-like;Dr_LOC100537594	Xt_myh8-like;Dr_LOC103909185	0	0.506759	0.506759	Bilateria			FALSE
Xt_myh8-like;Dr_zgc:66156	Xt_myh8-like;Dr_LOC103909185	0	0.506759	0.506759	Bilateria			TRUE
Xt_myh8-like;Dr_myhb	Xt_myh8-like;Dr_LOC103909185	0	0.506759	0.506759	Bilateria			FALSE
Dr_LOC103909185;Xt_myh6	Dr_LOC103909185;Xt_myh8-like	0	0.506759	0.506759	Bilateria			TRUE
Xt_myh8-like;Dr_wu:fd14a01	Xt_myh8-like;Dr_LOC103909185	0	0.506759	0.506759	Bilateria			FALSE
Dr_LOC103909185;Xt_Xetrov90025695m	Dr_LOC103909185;Xt_myh8-like	0	0.506759	0.506759	Bilateria			TRUE
Dr_vmhc;Xt_myh6	Dr_vmhc;Xt_LOC101734799	0	0.505598	0.505598	Bilateria			FALSE
Dr_vmhc;Xt_Xetrov90025695m	Dr_vmhc;Xt_LOC101734799	0	0.505598	0.505598	Bilateria			FALSE
Xt_LOC101734799;Dr_zgc:66156	Xt_LOC101734799;Dr_vmhc	0	0.505598	0.505598	Bilateria			TRUE
Xt_LOC101734799;Dr_wu:fd14a01	Xt_LOC101734799;Dr_vmhc	0	0.505598	0.505598	Bilateria			TRUE
Dr_vmhc;Xt_myh7	Dr_vmhc;Xt_LOC101734799	0	0.505598	0.505598	Bilateria			TRUE
Xt_LOC101734799;Dr_myhb	Xt_LOC101734799;Dr_vmhc	0	0.505598	0.505598	Bilateria			TRUE
Xt_LOC101734799;Dr_LOC100537594	Xt_LOC101734799;Dr_vmhc	0	0.505598	0.505598	Bilateria			TRUE
Dr_map1aa;Xt_map1a-like.1	Dr_map1aa;Xt_map1b	0	0.505526	0.505526	Bilateria	Dr_Neuron;Dr_Rohon-beard neuron	Xt_Neuron;Xt_Rohon-beard neuron	TRUE
Xt_myh8-like;Dr_wu:fd14a01	Xt_myh8-like;Dr_smyhc2	0	0.50353	0.50353	Bilateria			FALSE
Xt_myh8-like;Dr_LOC100537594	Xt_myh8-like;Dr_smyhc2	0	0.50353	0.50353	Bilateria			FALSE
Xt_myh8-like;Dr_zgc:66156	Xt_myh8-like;Dr_smyhc2	0	0.50353	0.50353	Bilateria			TRUE
Xt_myh8-like;Dr_myhb	Xt_myh8-like;Dr_smyhc2	0	0.50353	0.50353	Bilateria			FALSE
Dr_smyhc2;Xt_myh7	Dr_smyhc2;Xt_myh8-like	0	0.50353	0.50353	Bilateria			TRUE
Dr_smyhc2;Xt_myh6	Dr_smyhc2;Xt_myh8-like	0	0.50353	0.50353	Bilateria			TRUE
Dr_smyhc2;Xt_Xetrov90025695m	Dr_smyhc2;Xt_myh8-like	0	0.50353	0.50353	Bilateria			TRUE
Dr_im:7154332;Xt_comp	Dr_im:7154332;Xt_LOC101732630	0	0.494538	0.494538	Bilateria	Dr_Skeletal muscle	Xt_Skeletal muscle	FALSE
Dr_capn8;Xt_LOC100497284-like	Dr_capn8;Xt_capn9	0	0.489214	0.489214	Bilateria	Dr_Hatching gland;Dr_Ionocyte;Dr_Rare epidermal subtypes;Dr_Secretory epidermal	Xt_Cement gland primordium;Xt_Goblet cell;Xt_Hatching gland;Xt_Ionocyte	TRUE
Dr_capn8;Xt_LOC101730581	Dr_capn8;Xt_capn9	0	0.489214	0.489214	Bilateria	Dr_Hatching gland;Dr_Ionocyte;Dr_Rare epidermal subtypes;Dr_Secretory epidermal	Xt_Cement gland primordium;Xt_Goblet cell;Xt_Hatching gland;Xt_Ionocyte	TRUE
Dr_capn8;Xt_capn2	Dr_capn8;Xt_capn9	0	0.489214	0.489214	Bilateria	Dr_Hatching gland;Dr_Ionocyte;Dr_Rare epidermal subtypes;Dr_Secretory epidermal	Xt_Cement gland primordium;Xt_Goblet cell;Xt_Hatching gland;Xt_Ionocyte	FALSE
Dr_capn8;Xt_LOC101731595	Dr_capn8;Xt_capn9	0	0.489214	0.489214	Bilateria	Dr_Hatching gland;Dr_Ionocyte;Dr_Rare epidermal subtypes;Dr_Secretory epidermal	Xt_Cement gland primordium;Xt_Goblet cell;Xt_Hatching gland;Xt_Ionocyte	TRUE
Dr_capn8;Xt_capn8	Dr_capn8;Xt_capn9	0	0.489214	0.489214	Bilateria	Dr_Hatching gland;Dr_Ionocyte;Dr_Rare epidermal subtypes;Dr_Secretory epidermal	Xt_Cement gland primordium;Xt_Goblet cell;Xt_Hatching gland;Xt_Ionocyte	FALSE
Dr_capn8;Xt_Xetrov90013012m	Dr_capn8;Xt_capn9	0	0.489214	0.489214	Bilateria	Dr_Hatching gland;Dr_Ionocyte;Dr_Rare epidermal subtypes;Dr_Secretory epidermal	Xt_Cement gland primordium;Xt_Goblet cell;Xt_Hatching gland;Xt_Ionocyte	TRUE
Dr_capn2b;Xt_LOC101733523	Dr_capn2b;Xt_capn1-like.1	0	0.487105	0.487105	Bilateria	Dr_Epidermal progenitor;Dr_Hatching gland;Dr_Ionocyte;Dr_Rare epidermal subtypes;Dr_Secretory epidermal	Xt_Cement gland primordium;Xt_Epidermal progenitor;Xt_Goblet cell;Xt_Hatching gland;Xt_Ionocyte;Xt_Small secretory cells	TRUE
Xt_capn1-like.1;Dr_zgc:55262	Xt_capn1-like.1;Dr_capn2b	0	0.487105	0.487105	Bilateria	Dr_Epidermal progenitor;Dr_Hatching gland;Dr_Ionocyte;Dr_Rare epidermal subtypes;Dr_Secretory epidermal	Xt_Cement gland primordium;Xt_Epidermal progenitor;Xt_Goblet cell;Xt_Hatching gland;Xt_Ionocyte;Xt_Small secretory cells	FALSE
Xt_capn1-like.1;Dr_capn1a	Xt_capn1-like.1;Dr_capn2b	0	0.487105	0.487105	Bilateria	Dr_Epidermal progenitor;Dr_Hatching gland;Dr_Ionocyte;Dr_Rare epidermal subtypes;Dr_Secretory epidermal	Xt_Cement gland primordium;Xt_Epidermal progenitor;Xt_Goblet cell;Xt_Hatching gland;Xt_Ionocyte;Xt_Small secretory cells	FALSE
Xt_capn1-like.1;Dr_si:dkeyp-50d11.2	Xt_capn1-like.1;Dr_capn2b	0	0.487105	0.487105	Bilateria	Dr_Epidermal progenitor;Dr_Hatching gland;Dr_Ionocyte;Dr_Rare epidermal subtypes;Dr_Secretory epidermal	Xt_Cement gland primordium;Xt_Epidermal progenitor;Xt_Goblet cell;Xt_Hatching gland;Xt_Ionocyte;Xt_Small secretory cells	FALSE
Dr_tyrp1a;Xt_tyrp1	Dr_tyrp1a;Xt_dct	0	0.484809	0.484809	Bilateria			FALSE
Dr_smyhc1;Xt_myh6	Dr_smyhc1;Xt_myh2	0	0.481107	0.481107	Bilateria	Dr_Skeletal muscle	Xt_Skeletal muscle	FALSE
Dr_smyhc1;Xt_myh7	Dr_smyhc1;Xt_myh2	0	0.481107	0.481107	Bilateria	Dr_Skeletal muscle	Xt_Skeletal muscle	TRUE
Xt_myh2;Dr_wu:fd14a01	Xt_myh2;Dr_smyhc1	0	0.481107	0.481107	Bilateria	Dr_Skeletal muscle	Xt_Skeletal muscle	FALSE
Xt_myh2;Dr_LOC100537594	Xt_myh2;Dr_smyhc1	0	0.481107	0.481107	Bilateria	Dr_Skeletal muscle	Xt_Skeletal muscle	FALSE
Dr_smyhc1;Xt_Xetrov90025695m	Dr_smyhc1;Xt_myh2	0	0.481107	0.481107	Bilateria	Dr_Skeletal muscle	Xt_Skeletal muscle	FALSE
Xt_myh2;Dr_myhb	Xt_myh2;Dr_smyhc1	0	0.481107	0.481107	Bilateria	Dr_Skeletal muscle	Xt_Skeletal muscle	FALSE
Xt_myh2;Dr_zgc:66156	Xt_myh2;Dr_smyhc1	0	0.481107	0.481107	Bilateria	Dr_Skeletal muscle	Xt_Skeletal muscle	TRUE
Xt_ywhab;Dr_ywhabb	Xt_ywhab;Dr_ywhaqb	0	0.47793	0.47793	Bilateria	Dr_Endothelial;Dr_Epidermal progenitor;Dr_Eye primordium;Dr_Forebrain/midbrain;Dr_Hindbrain;Dr_Intermediate mesoderm;Dr_Ionocyte;Dr_Neural crest;Dr_Neuron;Dr_Placodal area;Dr_Presomitic mesoderm;Dr_Rohon-beard neuron;Dr_Tailbud	Xt_Endothelial;Xt_Epidermal progenitor;Xt_Eye primordium;Xt_Forebrain/midbrain;Xt_Hindbrain;Xt_Ionocyte;Xt_Neural crest;Xt_Neuron;Xt_Optic;Xt_Placodal area;Xt_Presomitic mesoderm;Xt_Rohon-beard neuron	FALSE
Dr_srsf5a;Xt_krt5.1-like.2	Dr_srsf5a;Xt_srsf5	0	0.457057	0.457057	Bilateria	Dr_Dorsal organizer;Dr_Endoderm;Dr_Involuting marginal zone;Dr_Neuroectoderm;Dr_Non-neural ectoderm	Xt_Endoderm;Xt_Involuting marginal zone;Xt_Neuroectoderm;Xt_Non-neural ectoderm;Xt_Spemann organizer	FALSE
Xt_srsf5;Dr_srsf5b	Xt_srsf5;Dr_srsf5a	0	0.457057	0.457057	Bilateria	Dr_Dorsal organizer;Dr_Endoderm;Dr_Involuting marginal zone;Dr_Neuroectoderm;Dr_Non-neural ectoderm	Xt_Endoderm;Xt_Involuting marginal zone;Xt_Neuroectoderm;Xt_Non-neural ectoderm;Xt_Spemann organizer	FALSE
Xt_dnah3;Dr_si:dkey-161j23.4	Xt_dnah3;Dr_dnah12	0	0.456507	0.456507	Bilateria			FALSE
Dr_si:ch211-165e15.1;Xt_LOC101733559	Dr_si:ch211-165e15.1;Xt_dst	0	0.452918	0.452918	Bilateria	Dr_Skeletal muscle	Xt_Skeletal muscle	TRUE
Xt_dst;Dr_LOC103908631	Xt_dst;Dr_si:ch211-165e15.1	0	0.452918	0.452918	Bilateria	Dr_Skeletal muscle	Xt_Skeletal muscle	FALSE
Xt_dst;Dr_dst	Xt_dst;Dr_si:ch211-165e15.1	0	0.452918	0.452918	Bilateria	Dr_Skeletal muscle	Xt_Skeletal muscle	FALSE
Xt_elovl7;Dr_elovl7a	Xt_elovl7;Dr_elovl1b	0.122966	0.574335	0.451369	Bilateria	Dr_Endoderm;Dr_Ionocyte;Dr_Rare epidermal subtypes	Xt_Goblet cell;Xt_Hatching gland;Xt_Ionocyte;Xt_Small secretory cells	FALSE
Dr_nono;Xt_nono	Dr_nono;Xt_sfpq	0.185485	0.636602	0.451117	Bilateria	Dr_Dorsal organizer;Dr_Endoderm;Dr_Involuting marginal zone;Dr_Neuroectoderm;Dr_Non-neural ectoderm;Dr_Notochord;Dr_Presomitic mesoderm;Dr_Tailbud	Xt_Endoderm;Xt_Hindbrain;Xt_Involuting marginal zone;Xt_Neuroectoderm;Xt_Non-neural ectoderm;Xt_Spemann organizer;Xt_Tailbud	FALSE
Xt_capn1-like.1;Dr_capn1b	Xt_capn1-like.1;Dr_capn2l	0.0874022	0.526804	0.439402	Bilateria	Dr_Ionocyte;Dr_Rare epidermal subtypes;Dr_Secretory epidermal	Xt_Cement gland primordium;Xt_Goblet cell;Xt_Hatching gland;Xt_Ionocyte;Xt_Small secretory cells	FALSE
Xt_capn1-like.1;Dr_capn1a	Xt_capn1-like.1;Dr_capn9	0	0.437913	0.437913	Bilateria	Dr_Ionocyte;Dr_Rare epidermal subtypes	Xt_Goblet cell;Xt_Hatching gland;Xt_Ionocyte;Xt_Small secretory cells	FALSE
Xt_capn1-like.1;Dr_zgc:55262	Xt_capn1-like.1;Dr_capn9	0	0.437913	0.437913	Bilateria	Dr_Ionocyte;Dr_Rare epidermal subtypes	Xt_Goblet cell;Xt_Hatching gland;Xt_Ionocyte;Xt_Small secretory cells	FALSE
Xt_capn1-like.1;Dr_si:dkeyp-50d11.2	Xt_capn1-like.1;Dr_capn9	0	0.437913	0.437913	Bilateria	Dr_Ionocyte;Dr_Rare epidermal subtypes	Xt_Goblet cell;Xt_Hatching gland;Xt_Ionocyte;Xt_Small secretory cells	FALSE
Xt_zeb2;Dr_zeb2b	Xt_zeb2;Dr_zeb2a	0	0.43754	0.43754	Bilateria	Dr_Blood;Dr_Eye primordium;Dr_Forebrain/midbrain;Dr_Hindbrain;Dr_Macrophage;Dr_Neural crest;Dr_Neuron;Dr_Notoplate;Dr_Optic;Dr_Rohon-beard neuron;Dr_Tailbud	Xt_Blood;Xt_Eye primordium;Xt_Forebrain/midbrain;Xt_Hindbrain;Xt_Myeloid progenitors;Xt_Neural crest;Xt_Neuron;Xt_Notoplate;Xt_Optic;Xt_Tailbud	FALSE
Xt_crmp1;Dr_crmp1	Xt_crmp1;Dr_dpysl2b	0	0.436386	0.436386	Bilateria	Dr_Neuron;Dr_Rohon-beard neuron	Xt_Neuron;Xt_Rohon-beard neuron	FALSE
Xt_tfap2b;Dr_tfap2b	Xt_tfap2b;Dr_tfap2a	0.0355286	0.46884	0.433311	Bilateria	Dr_Neural crest;Dr_Placodal area	Xt_Neural crest;Xt_Placodal area	FALSE
Dr_tuba8l4;Xt_LOC100497528	Dr_tuba8l4;Xt_tuba4b	0	0.432882	0.432882	Bilateria	Dr_Endothelial;Dr_Eye primordium;Dr_Forebrain/midbrain;Dr_Hindbrain;Dr_Intermediate mesoderm;Dr_Neural crest;Dr_Optic;Dr_Rare epidermal subtypes;Dr_Tailbud	Xt_Endothelial;Xt_Eye primordium;Xt_Forebrain/midbrain;Xt_Goblet cell;Xt_Hatching gland;Xt_Hindbrain;Xt_Neural crest;Xt_Optic;Xt_Small secretory cells	FALSE
Dr_tuba8l4;Xt_LOC100497157	Dr_tuba8l4;Xt_tuba4b	0	0.432882	0.432882	Bilateria	Dr_Endothelial;Dr_Eye primordium;Dr_Forebrain/midbrain;Dr_Hindbrain;Dr_Intermediate mesoderm;Dr_Neural crest;Dr_Optic;Dr_Rare epidermal subtypes;Dr_Tailbud	Xt_Endothelial;Xt_Eye primordium;Xt_Forebrain/midbrain;Xt_Goblet cell;Xt_Hatching gland;Xt_Hindbrain;Xt_Neural crest;Xt_Optic;Xt_Small secretory cells	FALSE
Dr_tuba8l4;Xt_Xetrov90024521m	Dr_tuba8l4;Xt_tuba4b	0	0.432882	0.432882	Bilateria	Dr_Endothelial;Dr_Eye primordium;Dr_Forebrain/midbrain;Dr_Hindbrain;Dr_Intermediate mesoderm;Dr_Neural crest;Dr_Optic;Dr_Rare epidermal subtypes;Dr_Tailbud	Xt_Endothelial;Xt_Eye primordium;Xt_Forebrain/midbrain;Xt_Goblet cell;Xt_Hatching gland;Xt_Hindbrain;Xt_Neural crest;Xt_Optic;Xt_Small secretory cells	FALSE
Dr_tuba8l4;Xt_LOC100490289-like	Dr_tuba8l4;Xt_tuba4b	0	0.432882	0.432882	Bilateria	Dr_Endothelial;Dr_Eye primordium;Dr_Forebrain/midbrain;Dr_Hindbrain;Dr_Intermediate mesoderm;Dr_Neural crest;Dr_Optic;Dr_Rare epidermal subtypes;Dr_Tailbud	Xt_Endothelial;Xt_Eye primordium;Xt_Forebrain/midbrain;Xt_Goblet cell;Xt_Hatching gland;Xt_Hindbrain;Xt_Neural crest;Xt_Optic;Xt_Small secretory cells	FALSE
Dr_tuba8l4;Xt_tuba1b	Dr_tuba8l4;Xt_tuba4b	0	0.432882	0.432882	Bilateria	Dr_Endothelial;Dr_Eye primordium;Dr_Forebrain/midbrain;Dr_Hindbrain;Dr_Intermediate mesoderm;Dr_Neural crest;Dr_Optic;Dr_Rare epidermal subtypes;Dr_Tailbud	Xt_Endothelial;Xt_Eye primordium;Xt_Forebrain/midbrain;Xt_Goblet cell;Xt_Hatching gland;Xt_Hindbrain;Xt_Neural crest;Xt_Optic;Xt_Small secretory cells	FALSE
Dr_tuba8l4;Xt_Xetrov90024523m	Dr_tuba8l4;Xt_tuba4b	0	0.432882	0.432882	Bilateria	Dr_Endothelial;Dr_Eye primordium;Dr_Forebrain/midbrain;Dr_Hindbrain;Dr_Intermediate mesoderm;Dr_Neural crest;Dr_Optic;Dr_Rare epidermal subtypes;Dr_Tailbud	Xt_Endothelial;Xt_Eye primordium;Xt_Forebrain/midbrain;Xt_Goblet cell;Xt_Hatching gland;Xt_Hindbrain;Xt_Neural crest;Xt_Optic;Xt_Small secretory cells	FALSE
Dr_tuba8l4;Xt_tubal3	Dr_tuba8l4;Xt_tuba4b	0	0.432882	0.432882	Bilateria	Dr_Endothelial;Dr_Eye primordium;Dr_Forebrain/midbrain;Dr_Hindbrain;Dr_Intermediate mesoderm;Dr_Neural crest;Dr_Optic;Dr_Rare epidermal subtypes;Dr_Tailbud	Xt_Endothelial;Xt_Eye primordium;Xt_Forebrain/midbrain;Xt_Goblet cell;Xt_Hatching gland;Xt_Hindbrain;Xt_Neural crest;Xt_Optic;Xt_Small secretory cells	FALSE
Xt_coro1c;Dr_coro1cb	Xt_coro1c;Dr_coro1a	0	0.425939	0.425939	Bilateria	Dr_Macrophage	Xt_Myeloid progenitors	FALSE
Dr_st18;Xt_st18	Dr_st18;Xt_myt1	0	0.420241	0.420241	Bilateria	Dr_Neuron	Xt_Neuron	FALSE
Xt_dpysl2;Dr_dpysl2	Xt_dpysl2;Dr_dpysl3	0	0.415238	0.415238	Bilateria	Dr_Neuron;Dr_Rohon-beard neuron	Xt_Neuron;Xt_Rohon-beard neuron	FALSE
Dr_zfand5a;Xt_zfand5	Dr_zfand5a;Xt_zfand6	0.0909136	0.505421	0.414507	Bilateria	Dr_Presomitic mesoderm;Dr_Skeletal muscle	Xt_Presomitic mesoderm;Xt_Skeletal muscle	FALSE
Xt_vill;Dr_vill	Xt_vill;Dr_gsnb	0	0.412704	0.412704	Bilateria	Dr_Ionocyte;Dr_Rare epidermal subtypes;Dr_Secretory epidermal	Xt_Cement gland primordium;Xt_Goblet cell;Xt_Hatching gland;Xt_Ionocyte;Xt_Small secretory cells	FALSE
Xt_vill;Dr_vil1	Xt_vill;Dr_gsnb	0	0.412704	0.412704	Bilateria	Dr_Ionocyte;Dr_Rare epidermal subtypes;Dr_Secretory epidermal	Xt_Cement gland primordium;Xt_Goblet cell;Xt_Hatching gland;Xt_Ionocyte;Xt_Small secretory cells	FALSE
Dr_gsnb;Xt_gsn	Dr_gsnb;Xt_vill	0	0.412704	0.412704	Bilateria	Dr_Ionocyte;Dr_Rare epidermal subtypes;Dr_Secretory epidermal	Xt_Cement gland primordium;Xt_Goblet cell;Xt_Hatching gland;Xt_Ionocyte;Xt_Small secretory cells	FALSE
Dr_gsnb;Xt_Xetrov90026042m	Dr_gsnb;Xt_vill	0	0.412704	0.412704	Bilateria	Dr_Ionocyte;Dr_Rare epidermal subtypes;Dr_Secretory epidermal	Xt_Cement gland primordium;Xt_Goblet cell;Xt_Hatching gland;Xt_Ionocyte;Xt_Small secretory cells	TRUE
Xt_vill;Dr_avil	Xt_vill;Dr_gsnb	0	0.412704	0.412704	Bilateria	Dr_Ionocyte;Dr_Rare epidermal subtypes;Dr_Secretory epidermal	Xt_Cement gland primordium;Xt_Goblet cell;Xt_Hatching gland;Xt_Ionocyte;Xt_Small secretory cells	FALSE
Xt_elovl7;Dr_elovl7b	Xt_elovl7;Dr_elovl1b	0.163556	0.574335	0.410779	Bilateria	Dr_Endoderm;Dr_Ionocyte;Dr_Rare epidermal subtypes	Xt_Goblet cell;Xt_Hatching gland;Xt_Ionocyte;Xt_Small secretory cells	FALSE
Dr_LOC103909603;Xt_LOC100498169	Dr_LOC103909603;Xt_capn1-like.1	0.339528	0.749932	0.410404	Bilateria	Dr_Epidermal progenitor;Dr_Ionocyte;Dr_Placodal area;Dr_Rare epidermal subtypes;Dr_Secretory epidermal	Xt_Cement gland primordium;Xt_Epidermal progenitor;Xt_Goblet cell;Xt_Hatching gland;Xt_Ionocyte;Xt_Small secretory cells	FALSE
Xt_Xetrov90028118m;Dr_LOC563561	Xt_Xetrov90028118m;Dr_bin1b	0.164667	0.5683	0.403633	Bilateria	Dr_Skeletal muscle	Xt_Skeletal muscle	FALSE
Dr_pou3f3b;Xt_pou3f3	Dr_pou3f3b;Xt_pou3f2	0	0.400423	0.400423	Bilateria	Dr_Forebrain/midbrain;Dr_Hindbrain	Xt_Hindbrain	TRUE
Dr_pou3f3b;Xt_pou3f3	Dr_pou3f3b;Xt_pou3f4	0	0.400415	0.400415	Bilateria	Dr_Forebrain/midbrain;Dr_Hindbrain	Xt_Hindbrain;Xt_Pronephric mesenchyme	TRUE
Xt_capn1-like.1;Dr_capn1b	Xt_capn1-like.1;Dr_capn2b	0.0874022	0.487105	0.399703	Bilateria	Dr_Epidermal progenitor;Dr_Hatching gland;Dr_Ionocyte;Dr_Rare epidermal subtypes;Dr_Secretory epidermal	Xt_Cement gland primordium;Xt_Epidermal progenitor;Xt_Goblet cell;Xt_Hatching gland;Xt_Ionocyte;Xt_Small secretory cells	FALSE
Dr_smyhc2;Xt_Xetrov90025695m	Dr_smyhc2;Xt_myh2	0	0.391664	0.391664	Bilateria			TRUE
Xt_myh2;Dr_LOC100537594	Xt_myh2;Dr_smyhc2	0	0.391664	0.391664	Bilateria			FALSE
Dr_smyhc2;Xt_myh6	Dr_smyhc2;Xt_myh2	0	0.391664	0.391664	Bilateria			TRUE
Xt_myh2;Dr_wu:fd14a01	Xt_myh2;Dr_smyhc2	0	0.391664	0.391664	Bilateria			FALSE
Xt_myh2;Dr_zgc:66156	Xt_myh2;Dr_smyhc2	0	0.391664	0.391664	Bilateria			TRUE
Dr_smyhc2;Xt_myh7	Dr_smyhc2;Xt_myh2	0	0.391664	0.391664	Bilateria			TRUE
Xt_myh2;Dr_myhb	Xt_myh2;Dr_smyhc2	0	0.391664	0.391664	Bilateria			FALSE
Dr_LOC103909185;Xt_Xetrov90025695m	Dr_LOC103909185;Xt_myh2	0	0.391575	0.391575	Bilateria			TRUE
Xt_myh2;Dr_zgc:66156	Xt_myh2;Dr_LOC103909185	0	0.391575	0.391575	Bilateria			TRUE
Xt_myh2;Dr_wu:fd14a01	Xt_myh2;Dr_LOC103909185	0	0.391575	0.391575	Bilateria			FALSE
Dr_LOC103909185;Xt_myh6	Dr_LOC103909185;Xt_myh2	0	0.391575	0.391575	Bilateria			TRUE
Xt_myh2;Dr_myhb	Xt_myh2;Dr_LOC103909185	0	0.391575	0.391575	Bilateria			FALSE
Xt_myh2;Dr_LOC100537594	Xt_myh2;Dr_LOC103909185	0	0.391575	0.391575	Bilateria			FALSE
Dr_LOC103909185;Xt_myh7	Dr_LOC103909185;Xt_myh2	0	0.391575	0.391575	Bilateria			TRUE
Xt_zic1;Dr_zic1	Xt_zic1;Dr_zic2b	0.153717	0.543995	0.390277	Bilateria	Dr_Neuroectoderm;Dr_Tailbud	Xt_Hindbrain;Xt_Neuroectoderm	FALSE
Xt_dnah7;Dr_dnah7	Xt_dnah7;Dr_dnah12	0.0359341	0.423151	0.387217	Bilateria			FALSE
Xt_pfkfb2;Dr_LOC564852	Xt_pfkfb2;Dr_pfkfb4l	0	0.380448	0.380448	Bilateria	Dr_Involuting marginal zone;Dr_Neuroectoderm;Dr_Non-neural ectoderm	Xt_Involuting marginal zone;Xt_Neuroectoderm;Xt_Non-neural ectoderm	FALSE
Xt_zfand6;Dr_zfand6	Xt_zfand6;Dr_zfand5a	0.131986	0.505421	0.373435	Bilateria	Dr_Presomitic mesoderm;Dr_Skeletal muscle	Xt_Presomitic mesoderm;Xt_Skeletal muscle	FALSE
Xt_pfkfb2;Dr_LOC564852	Xt_pfkfb2;Dr_pfkfb4b	0	0.363356	0.363356	Bilateria	Dr_Involuting marginal zone;Dr_Neuroectoderm;Dr_Non-neural ectoderm	Xt_Involuting marginal zone;Xt_Neuroectoderm;Xt_Non-neural ectoderm	FALSE
Dr_pou3f1;Xt_pou3f1	Dr_pou3f1;Xt_pou3f2	0.0260652	0.38467	0.358605	Bilateria	Dr_Forebrain/midbrain;Dr_Hindbrain	Xt_Hindbrain	FALSE
Xt_abhd17b;Dr_abhd17b	Xt_abhd17b;Dr_abhd17c	0	0.351881	0.351881	Bilateria	Dr_Blastula	Xt_Blastula	FALSE
Xt_capn1-like.1;Dr_capn1b	Xt_capn1-like.1;Dr_capn9	0.0874022	0.437913	0.350511	Bilateria	Dr_Ionocyte;Dr_Rare epidermal subtypes	Xt_Goblet cell;Xt_Hatching gland;Xt_Ionocyte;Xt_Small secretory cells	FALSE
Xt_ywhae;Dr_ywhae1	Xt_ywhae;Dr_ywhaqb	0	0.349562	0.349562	Bilateria	Dr_Endoderm;Dr_Epidermal progenitor;Dr_Eye primordium;Dr_Forebrain/midbrain;Dr_Hindbrain;Dr_Ionocyte;Dr_Neural crest;Dr_Neuron;Dr_Placodal area;Dr_Rare epidermal subtypes;Dr_Rohon-beard neuron;Dr_Tailbud	Xt_Epidermal progenitor;Xt_Eye primordium;Xt_Forebrain/midbrain;Xt_Goblet cell;Xt_Hatching gland;Xt_Hindbrain;Xt_Ionocyte;Xt_Neural crest;Xt_Neuron;Xt_Optic;Xt_Placodal area;Xt_Rohon-beard neuron;Xt_Small secretory cells	FALSE
Xt_ywhae;Dr_ywhae2	Xt_ywhae;Dr_ywhaqb	0	0.349562	0.349562	Bilateria	Dr_Endoderm;Dr_Epidermal progenitor;Dr_Eye primordium;Dr_Forebrain/midbrain;Dr_Hindbrain;Dr_Ionocyte;Dr_Neural crest;Dr_Neuron;Dr_Placodal area;Dr_Rare epidermal subtypes;Dr_Rohon-beard neuron;Dr_Tailbud	Xt_Epidermal progenitor;Xt_Eye primordium;Xt_Forebrain/midbrain;Xt_Goblet cell;Xt_Hatching gland;Xt_Hindbrain;Xt_Ionocyte;Xt_Neural crest;Xt_Neuron;Xt_Optic;Xt_Placodal area;Xt_Rohon-beard neuron;Xt_Small secretory cells	FALSE
Xt_myh4;Dr_zgc:66156	Xt_myh4;Dr_LOC101882018	0	0.349258	0.349258	Bilateria			TRUE
Dr_LOC101882018;Xt_myh7b	Dr_LOC101882018;Xt_myh4	0	0.349258	0.349258	Bilateria			TRUE
Xt_myh4;Dr_wu:fd14a01	Xt_myh4;Dr_LOC101882018	0	0.349258	0.349258	Bilateria			FALSE
Xt_myh4;Dr_myhb	Xt_myh4;Dr_LOC101882018	0	0.349258	0.349258	Bilateria			FALSE
Xt_myh4;Dr_LOC100537594	Xt_myh4;Dr_LOC101882018	0	0.349258	0.349258	Bilateria			FALSE
Xt_crmp1;Dr_crmp1	Xt_crmp1;Dr_dpysl3	0	0.34538	0.34538	Bilateria	Dr_Neuron;Dr_Rohon-beard neuron	Xt_Neuron;Xt_Rohon-beard neuron	FALSE
Xt_ralb;Dr_kras	Xt_ralb;Dr_zgc:55558	0.0474232	0.391409	0.343986	Bilateria	Dr_Blastula;Dr_Involuting marginal zone;Dr_Neuroectoderm	Xt_Blastula;Xt_Involuting marginal zone;Xt_Neuroectoderm;Xt_Non-neural ectoderm	FALSE
Dr_snrpa;Xt_snrpa	Dr_snrpa;Xt_snrpb2	0.240251	0.583359	0.343108	Bilateria	Dr_Dorsal organizer;Dr_Endoderm;Dr_Involuting marginal zone;Dr_Neuroectoderm;Dr_Non-neural ectoderm;Dr_Notochord;Dr_Tailbud	Xt_Endoderm;Xt_Hindbrain;Xt_Involuting marginal zone;Xt_Neuroectoderm;Xt_Non-neural ectoderm;Xt_Spemann organizer;Xt_Tailbud	FALSE
Dr_prkcda;Xt_Xetrov90023502m	Dr_prkcda;Xt_prkch	0	0.340288	0.340288	Bilateria	Dr_Blastula	Xt_Blastula	TRUE
Dr_prkcda;Xt_Xetrov90002109m	Dr_prkcda;Xt_prkch	0	0.340288	0.340288	Bilateria	Dr_Blastula	Xt_Blastula	TRUE
Dr_prkcda;Xt_Xetrov90019023m	Dr_prkcda;Xt_prkch	0	0.340288	0.340288	Bilateria	Dr_Blastula	Xt_Blastula	TRUE
Dr_prkcda;Xt_Xetrov90023476m	Dr_prkcda;Xt_prkch	0	0.340288	0.340288	Bilateria	Dr_Blastula	Xt_Blastula	TRUE
Dr_prkcda;Xt_Xetrov90023497m	Dr_prkcda;Xt_prkch	0	0.340288	0.340288	Bilateria	Dr_Blastula	Xt_Blastula	TRUE
Dr_prkcda;Xt_Xetrov90005842m	Dr_prkcda;Xt_prkch	0	0.340288	0.340288	Bilateria	Dr_Blastula	Xt_Blastula	TRUE
Dr_prkcda;Xt_Xetrov90002766m	Dr_prkcda;Xt_prkch	0	0.340288	0.340288	Bilateria	Dr_Blastula	Xt_Blastula	TRUE
Dr_prkcda;Xt_Xetrov90004327m	Dr_prkcda;Xt_prkch	0	0.340288	0.340288	Bilateria	Dr_Blastula	Xt_Blastula	TRUE
Dr_prkcda;Xt_Xetrov90004318m	Dr_prkcda;Xt_prkch	0	0.340288	0.340288	Bilateria	Dr_Blastula	Xt_Blastula	TRUE
Dr_prkcda;Xt_Xetrov90004617m	Dr_prkcda;Xt_prkch	0	0.340288	0.340288	Bilateria	Dr_Blastula	Xt_Blastula	TRUE
Dr_prkcda;Xt_LOC101732896	Dr_prkcda;Xt_prkch	0	0.340288	0.340288	Bilateria	Dr_Blastula	Xt_Blastula	TRUE
Dr_prkcda;Xt_Xetrov90017868m	Dr_prkcda;Xt_prkch	0	0.340288	0.340288	Bilateria	Dr_Blastula	Xt_Blastula	TRUE
Dr_prkcda;Xt_Xetrov90017710m	Dr_prkcda;Xt_prkch	0	0.340288	0.340288	Bilateria	Dr_Blastula	Xt_Blastula	TRUE
Dr_prkcda;Xt_LOC101730567	Dr_prkcda;Xt_prkch	0	0.340288	0.340288	Bilateria	Dr_Blastula	Xt_Blastula	TRUE
Dr_prkcda;Xt_Xetrov90010288m	Dr_prkcda;Xt_prkch	0	0.340288	0.340288	Bilateria	Dr_Blastula	Xt_Blastula	TRUE
Dr_prkcda;Xt_Xetrov90007614m	Dr_prkcda;Xt_prkch	0	0.340288	0.340288	Bilateria	Dr_Blastula	Xt_Blastula	TRUE
Dr_prkcda;Xt_Xetrov90000581m	Dr_prkcda;Xt_prkch	0	0.340288	0.340288	Bilateria	Dr_Blastula	Xt_Blastula	TRUE
Dr_prkcda;Xt_Xetrov90000580m	Dr_prkcda;Xt_prkch	0	0.340288	0.340288	Bilateria	Dr_Blastula	Xt_Blastula	TRUE
Dr_prkcda;Xt_LOC101735024	Dr_prkcda;Xt_prkch	0	0.340288	0.340288	Bilateria	Dr_Blastula	Xt_Blastula	TRUE
Dr_prkcda;Xt_Xetrov90005900m	Dr_prkcda;Xt_prkch	0	0.340288	0.340288	Bilateria	Dr_Blastula	Xt_Blastula	TRUE
Dr_prkcda;Xt_Xetrov90005898m	Dr_prkcda;Xt_prkch	0	0.340288	0.340288	Bilateria	Dr_Blastula	Xt_Blastula	TRUE
Dr_prkcda;Xt_LOC101731094	Dr_prkcda;Xt_prkch	0	0.340288	0.340288	Bilateria	Dr_Blastula	Xt_Blastula	TRUE
Dr_prkcda;Xt_LOC101731223	Dr_prkcda;Xt_prkch	0	0.340288	0.340288	Bilateria	Dr_Blastula	Xt_Blastula	TRUE
Dr_prkcda;Xt_LOC101731335	Dr_prkcda;Xt_prkch	0	0.340288	0.340288	Bilateria	Dr_Blastula	Xt_Blastula	TRUE
Dr_prkcda;Xt_LOC101731388	Dr_prkcda;Xt_prkch	0	0.340288	0.340288	Bilateria	Dr_Blastula	Xt_Blastula	TRUE
Dr_prkcda;Xt_LOC101734963	Dr_prkcda;Xt_prkch	0	0.340288	0.340288	Bilateria	Dr_Blastula	Xt_Blastula	TRUE
Dr_prkcda;Xt_LOC101734907	Dr_prkcda;Xt_prkch	0	0.340288	0.340288	Bilateria	Dr_Blastula	Xt_Blastula	TRUE
Dr_prkcda;Xt_LOC101734839	Dr_prkcda;Xt_prkch	0	0.340288	0.340288	Bilateria	Dr_Blastula	Xt_Blastula	TRUE
Dr_prkcda;Xt_LOC101731405	Dr_prkcda;Xt_prkch	0	0.340288	0.340288	Bilateria	Dr_Blastula	Xt_Blastula	TRUE
Dr_prkcda;Xt_LOC101731442	Dr_prkcda;Xt_prkch	0	0.340288	0.340288	Bilateria	Dr_Blastula	Xt_Blastula	TRUE
Dr_prkcda;Xt_LOC101734833	Dr_prkcda;Xt_prkch	0	0.340288	0.340288	Bilateria	Dr_Blastula	Xt_Blastula	TRUE
Dr_prkcda;Xt_LOC101734681	Dr_prkcda;Xt_prkch	0	0.340288	0.340288	Bilateria	Dr_Blastula	Xt_Blastula	TRUE
Dr_prkcda;Xt_LOC101731454	Dr_prkcda;Xt_prkch	0	0.340288	0.340288	Bilateria	Dr_Blastula	Xt_Blastula	TRUE
Dr_prkcda;Xt_LOC101733236	Dr_prkcda;Xt_prkch	0	0.340288	0.340288	Bilateria	Dr_Blastula	Xt_Blastula	TRUE
Dr_prkcda;Xt_LOC101732082	Dr_prkcda;Xt_prkch	0	0.340288	0.340288	Bilateria	Dr_Blastula	Xt_Blastula	TRUE
Dr_prkcda;Xt_LOC101732914	Dr_prkcda;Xt_prkch	0	0.340288	0.340288	Bilateria	Dr_Blastula	Xt_Blastula	TRUE
Dr_prkcda;Xt_Xetrov90000582m	Dr_prkcda;Xt_prkch	0	0.340288	0.340288	Bilateria	Dr_Blastula	Xt_Blastula	TRUE
Dr_prkcda;Xt_prkcd	Dr_prkcda;Xt_prkch	0	0.340288	0.340288	Bilateria	Dr_Blastula	Xt_Blastula	FALSE
Dr_prkcda;Xt_Xetrov90011811m	Dr_prkcda;Xt_prkch	0	0.340288	0.340288	Bilateria	Dr_Blastula	Xt_Blastula	TRUE
Dr_prkcda;Xt_Xetrov90013280m	Dr_prkcda;Xt_prkch	0	0.340288	0.340288	Bilateria	Dr_Blastula	Xt_Blastula	TRUE
Dr_prkcda;Xt_Xetrov90023562m	Dr_prkcda;Xt_prkch	0	0.340288	0.340288	Bilateria	Dr_Blastula	Xt_Blastula	TRUE
Dr_prkcda;Xt_Xetrov90023564m	Dr_prkcda;Xt_prkch	0	0.340288	0.340288	Bilateria	Dr_Blastula	Xt_Blastula	TRUE
Dr_prkcda;Xt_Xetrov90013473m	Dr_prkcda;Xt_prkch	0	0.340288	0.340288	Bilateria	Dr_Blastula	Xt_Blastula	TRUE
Dr_prkcda;Xt_Xetrov90023618m	Dr_prkcda;Xt_prkch	0	0.340288	0.340288	Bilateria	Dr_Blastula	Xt_Blastula	TRUE
Dr_prkcda;Xt_Xetrov90025913m	Dr_prkcda;Xt_prkch	0	0.340288	0.340288	Bilateria	Dr_Blastula	Xt_Blastula	TRUE
Dr_prkcda;Xt_Xetrov90002011m	Dr_prkcda;Xt_prkch	0	0.340288	0.340288	Bilateria	Dr_Blastula	Xt_Blastula	TRUE
Dr_prkcda;Xt_Xetrov90026184m	Dr_prkcda;Xt_prkch	0	0.340288	0.340288	Bilateria	Dr_Blastula	Xt_Blastula	TRUE
Dr_prkcda;Xt_Xetrov90001988m	Dr_prkcda;Xt_prkch	0	0.340288	0.340288	Bilateria	Dr_Blastula	Xt_Blastula	TRUE
Dr_prkcda;Xt_Xetrov90001985m	Dr_prkcda;Xt_prkch	0	0.340288	0.340288	Bilateria	Dr_Blastula	Xt_Blastula	TRUE
Dr_prkcda;Xt_Xetrov90001965m	Dr_prkcda;Xt_prkch	0	0.340288	0.340288	Bilateria	Dr_Blastula	Xt_Blastula	FALSE
Dr_prkcda;Xt_Xetrov90005860m	Dr_prkcda;Xt_prkch	0	0.340288	0.340288	Bilateria	Dr_Blastula	Xt_Blastula	TRUE
Dr_prkcda;Xt_Xetrov90030508m	Dr_prkcda;Xt_prkch	0	0.340288	0.340288	Bilateria	Dr_Blastula	Xt_Blastula	TRUE
Dr_prkcda;Xt_Xetrov90000717m	Dr_prkcda;Xt_prkch	0	0.340288	0.340288	Bilateria	Dr_Blastula	Xt_Blastula	TRUE
Dr_prkcda;Xt_LOC100492960	Dr_prkcda;Xt_prkch	0	0.340288	0.340288	Bilateria	Dr_Blastula	Xt_Blastula	TRUE
Dr_prkcda;Xt_LOC100494858	Dr_prkcda;Xt_prkch	0	0.340288	0.340288	Bilateria	Dr_Blastula	Xt_Blastula	TRUE
Dr_prkcda;Xt_LOC100497432	Dr_prkcda;Xt_prkch	0	0.340288	0.340288	Bilateria	Dr_Blastula	Xt_Blastula	TRUE
Dr_prkcda;Xt_Xetrov90027709m	Dr_prkcda;Xt_prkch	0	0.340288	0.340288	Bilateria	Dr_Blastula	Xt_Blastula	TRUE
Xt_prkch;Dr_prkchb	Xt_prkch;Dr_prkcda	0	0.340288	0.340288	Bilateria	Dr_Blastula	Xt_Blastula	FALSE
Dr_prkcda;Xt_LOC101730464	Dr_prkcda;Xt_prkch	0	0.340288	0.340288	Bilateria	Dr_Blastula	Xt_Blastula	TRUE
Dr_prkcda;Xt_Xetrov90027715m	Dr_prkcda;Xt_prkch	0	0.340288	0.340288	Bilateria	Dr_Blastula	Xt_Blastula	TRUE
Dr_prkcda;Xt_Xetrov90029917m	Dr_prkcda;Xt_prkch	0	0.340288	0.340288	Bilateria	Dr_Blastula	Xt_Blastula	TRUE
Dr_prkcda;Xt_Xetrov90013261m	Dr_prkcda;Xt_prkch	0	0.340288	0.340288	Bilateria	Dr_Blastula	Xt_Blastula	TRUE
Dr_prkcda;Xt_Xetrov90000601m	Dr_prkcda;Xt_prkch	0	0.340288	0.340288	Bilateria	Dr_Blastula	Xt_Blastula	FALSE
Dr_prkcda;Xt_LOC101731023	Dr_prkcda;Xt_prkch	0	0.340288	0.340288	Bilateria	Dr_Blastula	Xt_Blastula	TRUE
Dr_prkcda;Xt_Xetrov90023503m	Dr_prkcda;Xt_prkch	0.000150683	0.340288	0.340137	Bilateria	Dr_Blastula	Xt_Blastula	TRUE
Dr_LOC100329748;Xt_myh6	Dr_LOC100329748;Xt_myh4	0	0.339029	0.339029	Bilateria			TRUE
Dr_LOC100329748;Xt_myh7	Dr_LOC100329748;Xt_myh4	0	0.339029	0.339029	Bilateria			TRUE
Xt_myh4;Dr_myhb	Xt_myh4;Dr_LOC100329748	0	0.339029	0.339029	Bilateria			FALSE
Dr_LOC100329748;Xt_Xetrov90025695m	Dr_LOC100329748;Xt_myh4	0	0.339029	0.339029	Bilateria			TRUE
Xt_myh4;Dr_wu:fd14a01	Xt_myh4;Dr_LOC100329748	0	0.339029	0.339029	Bilateria			FALSE
Xt_myh4;Dr_zgc:66156	Xt_myh4;Dr_LOC100329748	0	0.339029	0.339029	Bilateria			TRUE
Xt_myh4;Dr_LOC100537594	Xt_myh4;Dr_LOC100329748	0	0.339029	0.339029	Bilateria			FALSE
Xt_esco1;Dr_esco1	Xt_esco1;Dr_esco2	0	0.338497	0.338497	Bilateria	Dr_Blastula;Dr_Involuting marginal zone;Dr_Neuroectoderm	Xt_Blastula;Xt_Involuting marginal zone;Xt_Neuroectoderm	FALSE
Xt_Xetrov90026713m;Dr_wu:fd14a01	Xt_Xetrov90026713m;Dr_smyhc1	0	0.331156	0.331156	Bilateria	Dr_Skeletal muscle	Xt_Skeletal muscle	FALSE
Xt_Xetrov90026713m;Dr_LOC100537594	Xt_Xetrov90026713m;Dr_smyhc1	0	0.331156	0.331156	Bilateria	Dr_Skeletal muscle	Xt_Skeletal muscle	FALSE
Dr_smyhc1;Xt_Xetrov90025695m	Dr_smyhc1;Xt_Xetrov90026713m	0	0.331156	0.331156	Bilateria	Dr_Skeletal muscle	Xt_Skeletal muscle	FALSE
Xt_Xetrov90026713m;Dr_myhb	Xt_Xetrov90026713m;Dr_smyhc1	0	0.331156	0.331156	Bilateria	Dr_Skeletal muscle	Xt_Skeletal muscle	FALSE
Dr_smyhc1;Xt_myh6	Dr_smyhc1;Xt_Xetrov90026713m	0	0.331156	0.331156	Bilateria	Dr_Skeletal muscle	Xt_Skeletal muscle	FALSE
Xt_Xetrov90026713m;Dr_zgc:66156	Xt_Xetrov90026713m;Dr_smyhc1	0	0.331156	0.331156	Bilateria	Dr_Skeletal muscle	Xt_Skeletal muscle	TRUE
Dr_smyhc1;Xt_myh7	Dr_smyhc1;Xt_Xetrov90026713m	0	0.331156	0.331156	Bilateria	Dr_Skeletal muscle	Xt_Skeletal muscle	TRUE
Dr_postnb;Xt_postn	Dr_postnb;Xt_LOC101733581	0	0.327155	0.327155	Bilateria			FALSE
Dr_six2a;Xt_six2	Dr_six2a;Xt_six1	0	0.324166	0.324166	Bilateria	Dr_Intermediate mesoderm;Dr_Otic placode;Dr_Placodal area	Xt_Endothelial;Xt_Otic placode;Xt_Placodal area	TRUE
Xt_lamp1;Dr_lamp1	Xt_lamp1;Dr_LOC563328	0	0.321127	0.321127	Bilateria	Dr_Blastula;Dr_Notochord	Xt_Blastula;Xt_Notochord;Xt_Spemann organizer	FALSE
Dr_pou3f1;Xt_pou3f1	Dr_pou3f1;Xt_pou3f4	0.0260652	0.345692	0.319627	Bilateria	Dr_Forebrain/midbrain;Dr_Hindbrain	Xt_Hindbrain;Xt_Pronephric mesenchyme	FALSE
Dr_pfkfb4l;Xt_LOC100488795-like	Dr_pfkfb4l;Xt_pfkfb2	0.0610711	0.380448	0.319377	Bilateria	Dr_Involuting marginal zone;Dr_Neuroectoderm;Dr_Non-neural ectoderm	Xt_Involuting marginal zone;Xt_Neuroectoderm;Xt_Non-neural ectoderm	FALSE
Xt_calr;Dr_LOC101883687	Xt_calr;Dr_calr	0.0851388	0.404009	0.31887	Bilateria	Dr_Dorsal organizer;Dr_Epidermal progenitor;Dr_Hatching gland;Dr_Intermediate mesoderm;Dr_Macrophage;Dr_Neuron;Dr_Notochord;Dr_Notoplate;Dr_Placodal area;Dr_Rohon-beard neuron;Dr_Secretory epidermal	Xt_Cement gland primordium;Xt_Epidermal progenitor;Xt_Hatching gland;Xt_Myeloid progenitors;Xt_Neuron;Xt_Notochord;Xt_Notoplate;Xt_Placodal area;Xt_Rohon-beard neuron;Xt_Spemann organizer	FALSE
Dr_LOC101882018;Xt_myh7b	Dr_LOC101882018;Xt_myh8-like	0	0.317665	0.317665	Bilateria			TRUE
Xt_myh8-like;Dr_zgc:66156	Xt_myh8-like;Dr_LOC101882018	0	0.317665	0.317665	Bilateria			TRUE
Xt_myh8-like;Dr_wu:fd14a01	Xt_myh8-like;Dr_LOC101882018	0	0.317665	0.317665	Bilateria			FALSE
Xt_myh8-like;Dr_myhb	Xt_myh8-like;Dr_LOC101882018	0	0.317665	0.317665	Bilateria			FALSE
Xt_myh8-like;Dr_LOC100537594	Xt_myh8-like;Dr_LOC101882018	0	0.317665	0.317665	Bilateria			FALSE
Xt_eml1;Dr_eml2	Xt_eml1;Dr_eml4	0	0.317645	0.317645	Bilateria	Dr_Involuting marginal zone;Dr_Neuroectoderm;Dr_Non-neural ectoderm	Xt_Involuting marginal zone;Xt_Neuroectoderm;Xt_Non-neural ectoderm	FALSE
Xt_LOC101733581;Dr_tgfbi	Xt_LOC101733581;Dr_postnb	0.0101244	0.327155	0.31703	Bilateria			FALSE
Xt_myh8-like;Dr_LOC100537594	Xt_myh8-like;Dr_LOC100329748	0	0.31592	0.31592	Bilateria			FALSE
Dr_LOC100329748;Xt_myh7	Dr_LOC100329748;Xt_myh8-like	0	0.31592	0.31592	Bilateria			TRUE
Xt_myh8-like;Dr_zgc:66156	Xt_myh8-like;Dr_LOC100329748	0	0.31592	0.31592	Bilateria			TRUE
Xt_myh8-like;Dr_wu:fd14a01	Xt_myh8-like;Dr_LOC100329748	0	0.31592	0.31592	Bilateria			FALSE
Xt_myh8-like;Dr_myhb	Xt_myh8-like;Dr_LOC100329748	0	0.31592	0.31592	Bilateria			FALSE
Dr_LOC100329748;Xt_myh6	Dr_LOC100329748;Xt_myh8-like	0	0.31592	0.31592	Bilateria			TRUE
Dr_LOC100329748;Xt_Xetrov90025695m	Dr_LOC100329748;Xt_myh8-like	0	0.31592	0.31592	Bilateria			TRUE
Dr_pfkfb4b;Xt_LOC100488795-like	Dr_pfkfb4b;Xt_pfkfb2	0.0479214	0.363356	0.315435	Bilateria	Dr_Involuting marginal zone;Dr_Neuroectoderm;Dr_Non-neural ectoderm	Xt_Involuting marginal zone;Xt_Neuroectoderm;Xt_Non-neural ectoderm	FALSE
Dr_arf5;Xt_arf4	Dr_arf5;Xt_arf5	0	0.313294	0.313294	Bilateria	Dr_Epidermal progenitor;Dr_Neuroectoderm;Dr_Non-neural ectoderm	Xt_Epidermal progenitor;Xt_Neuroectoderm;Xt_Non-neural ectoderm	FALSE
Xt_ywhab;Dr_ywhaba	Xt_ywhab;Dr_ywhaqb	0.167929	0.47793	0.310001	Bilateria	Dr_Endothelial;Dr_Epidermal progenitor;Dr_Eye primordium;Dr_Forebrain/midbrain;Dr_Hindbrain;Dr_Intermediate mesoderm;Dr_Ionocyte;Dr_Neural crest;Dr_Neuron;Dr_Placodal area;Dr_Presomitic mesoderm;Dr_Rohon-beard neuron;Dr_Tailbud	Xt_Endothelial;Xt_Epidermal progenitor;Xt_Eye primordium;Xt_Forebrain/midbrain;Xt_Hindbrain;Xt_Ionocyte;Xt_Neural crest;Xt_Neuron;Xt_Optic;Xt_Placodal area;Xt_Presomitic mesoderm;Xt_Rohon-beard neuron	FALSE
Xt_scaf8;Dr_LOC103909092	Xt_scaf8;Dr_scaf4a	0	0.309843	0.309843	Bilateria			TRUE
Dr_isl2b;Xt_isl2	Dr_isl2b;Xt_isl1	0.323476	0.62776	0.304284	Bilateria	Dr_Rohon-beard neuron	Xt_Neuron;Xt_Rohon-beard neuron	FALSE
Xt_LOC101734799;Dr_wu:fd14a01	Xt_LOC101734799;Dr_vmhcl	0	0.302494	0.302494	Bilateria			TRUE
Xt_LOC101734799;Dr_LOC100537594	Xt_LOC101734799;Dr_vmhcl	0	0.302494	0.302494	Bilateria			TRUE
Dr_vmhcl;Xt_Xetrov90025695m	Dr_vmhcl;Xt_LOC101734799	0	0.302494	0.302494	Bilateria			FALSE
Dr_vmhcl;Xt_myh7	Dr_vmhcl;Xt_LOC101734799	0	0.302494	0.302494	Bilateria			TRUE
Xt_LOC101734799;Dr_myhb	Xt_LOC101734799;Dr_vmhcl	0	0.302494	0.302494	Bilateria			TRUE
Xt_LOC101734799;Dr_zgc:66156	Xt_LOC101734799;Dr_vmhcl	0	0.302494	0.302494	Bilateria			TRUE
Dr_vmhcl;Xt_myh6	Dr_vmhcl;Xt_LOC101734799	0	0.302494	0.302494	Bilateria			FALSE
Xt_six6;Dr_six6b	Xt_six6;Dr_six3b	0.0378118	0.65071	0.612898	Metazoa	Dr_Eye primordium;Dr_Forebrain/midbrain;Dr_Optic	Xt_Eye primordium;Xt_Optic	FALSE
Dr_vsx2;Xt_vsx2	Dr_vsx2;Xt_vsx1	0	0.611403	0.611403	Metazoa	Dr_Eye primordium;Dr_Optic	Xt_Eye primordium;Xt_Optic	FALSE
Xt_six6;Dr_six6a	Xt_six6;Dr_six3b	0.0539919	0.65071	0.596718	Metazoa	Dr_Eye primordium;Dr_Forebrain/midbrain;Dr_Optic	Xt_Eye primordium;Xt_Optic	FALSE
Xt_vsx1;Dr_vsx1	Xt_vsx1;Dr_vsx2	0.0330863	0.611403	0.578317	Metazoa	Dr_Eye primordium;Dr_Optic	Xt_Eye primordium;Xt_Optic	FALSE
Dr_foxf2b;Xt_foxf2	Dr_foxf2b;Xt_foxf1	0	0.526004	0.526004	Metazoa			FALSE
Xt_myh4;Dr_LOC100537594	Xt_myh4;Dr_myh7bb	0	0.510919	0.510919	Metazoa			FALSE
Xt_myh4;Dr_zgc:66156	Xt_myh4;Dr_myh7bb	0	0.510919	0.510919	Metazoa			TRUE
Xt_myh4;Dr_myhb	Xt_myh4;Dr_myh7bb	0	0.510919	0.510919	Metazoa			FALSE
Xt_myh4;Dr_wu:fd14a01	Xt_myh4;Dr_myh7bb	0	0.510919	0.510919	Metazoa			FALSE
Xt_matn2;Dr_matn4	Xt_matn2;Dr_zgc:158328	0	0.488733	0.488733	Metazoa	Dr_Notochord	Xt_Notochord	FALSE
Xt_hmgb2;Dr_hmgb2a	Xt_hmgb2;Dr_hmgb1b	0	0.480663	0.480663	Metazoa	Dr_Eye primordium;Dr_Forebrain/midbrain;Dr_Hindbrain;Dr_Intermediate mesoderm;Dr_Optic;Dr_Tailbud	Xt_Endothelial;Xt_Eye primordium;Xt_Forebrain/midbrain;Xt_Hindbrain;Xt_Intermediate mesoderm;Xt_Optic;Xt_Pronephric mesenchyme;Xt_Tailbud	FALSE
Xt_myh8-like;Dr_wu:fd14a01	Xt_myh8-like;Dr_myh7bb	0	0.45753	0.45753	Metazoa			FALSE
Xt_myh8-like;Dr_LOC100537594	Xt_myh8-like;Dr_myh7bb	0	0.45753	0.45753	Metazoa			FALSE
Xt_myh8-like;Dr_myhb	Xt_myh8-like;Dr_myh7bb	0	0.45753	0.45753	Metazoa			FALSE
Xt_myh8-like;Dr_zgc:66156	Xt_myh8-like;Dr_myh7bb	0	0.45753	0.45753	Metazoa			TRUE
Xt_cdx1;Dr_cdx1b	Xt_cdx1;Dr_cdx4	0	0.43807	0.43807	Metazoa	Dr_Endoderm;Dr_Involuting marginal zone;Dr_Presomitic mesoderm;Dr_Tailbud	Xt_Endoderm;Xt_Involuting marginal zone;Xt_Tailbud	FALSE
Xt_tekt3;Dr_tekt3	Xt_tekt3;Dr_tekt1	0	0.402116	0.402116	Metazoa			TRUE
Xt_tgfbr1;Dr_tgfbr1b	Xt_tgfbr1;Dr_acvr1l	0	0.362952	0.362952	Metazoa	Dr_Dorsal organizer;Dr_Endoderm;Dr_Involuting marginal zone;Dr_Neuroectoderm;Dr_Non-neural ectoderm;Dr_Notochord	Xt_Endoderm;Xt_Involuting marginal zone;Xt_Neuroectoderm;Xt_Non-neural ectoderm;Xt_Notochord;Xt_Spemann organizer	FALSE
Xt_tgfbr1;Dr_tgfbr1a	Xt_tgfbr1;Dr_acvr1l	0	0.362952	0.362952	Metazoa	Dr_Dorsal organizer;Dr_Endoderm;Dr_Involuting marginal zone;Dr_Neuroectoderm;Dr_Non-neural ectoderm;Dr_Notochord	Xt_Endoderm;Xt_Involuting marginal zone;Xt_Neuroectoderm;Xt_Non-neural ectoderm;Xt_Notochord;Xt_Spemann organizer	FALSE
Xt_nkx2-1;Dr_nkx2.1	Xt_nkx2-1;Dr_nkx2.4b	0.333604	0.675932	0.342328	Metazoa			FALSE
Xt_myh2;Dr_wu:fd14a01	Xt_myh2;Dr_myh7bb	0	0.341243	0.341243	Metazoa			FALSE
Xt_myh2;Dr_LOC100537594	Xt_myh2;Dr_myh7bb	0	0.341243	0.341243	Metazoa			FALSE
Xt_myh2;Dr_myhb	Xt_myh2;Dr_myh7bb	0	0.341243	0.341243	Metazoa			FALSE
Xt_myh2;Dr_zgc:66156	Xt_myh2;Dr_myh7bb	0	0.341243	0.341243	Metazoa			TRUE
Xt_vill;Dr_vil1	Xt_vill;Dr_scinla	0	0.332806	0.332806	Metazoa	Dr_Ionocyte;Dr_Rare epidermal subtypes	Xt_Goblet cell;Xt_Hatching gland;Xt_Ionocyte;Xt_Small secretory cells	FALSE
Xt_vill;Dr_vill	Xt_vill;Dr_scinla	0	0.332806	0.332806	Metazoa	Dr_Ionocyte;Dr_Rare epidermal subtypes	Xt_Goblet cell;Xt_Hatching gland;Xt_Ionocyte;Xt_Small secretory cells	FALSE
Xt_vill;Dr_avil	Xt_vill;Dr_scinla	0	0.332806	0.332806	Metazoa	Dr_Ionocyte;Dr_Rare epidermal subtypes	Xt_Goblet cell;Xt_Hatching gland;Xt_Ionocyte;Xt_Small secretory cells	FALSE
Dr_scinla;Xt_scin	Dr_scinla;Xt_vill	0	0.332806	0.332806	Metazoa	Dr_Ionocyte;Dr_Rare epidermal subtypes	Xt_Goblet cell;Xt_Hatching gland;Xt_Ionocyte;Xt_Small secretory cells	TRUE
Dr_anp32a;Xt_anp32a	Dr_anp32a;Xt_anp32b	0.113147	0.435861	0.322714	Metazoa	Dr_Forebrain/midbrain;Dr_Hindbrain;Dr_Intermediate mesoderm;Dr_Neuroectoderm;Dr_Non-neural ectoderm;Dr_Optic;Dr_Tailbud	Xt_Endothelial;Xt_Eye primordium;Xt_Forebrain/midbrain;Xt_Hindbrain;Xt_Intermediate mesoderm;Xt_Neuroectoderm;Xt_Non-neural ectoderm;Xt_Optic;Xt_Pronephric mesenchyme;Xt_Spemann organizer	FALSE
Dr_zgc:92027;Xt_gca	Dr_zgc:92027;Xt_sri	0.0618035	0.363158	0.301354	Metazoa	Dr_Endothelial;Dr_Epidermal progenitor;Dr_Ionocyte;Dr_Macrophage;Dr_Placodal area	Xt_Endothelial;Xt_Epidermal progenitor;Xt_Ionocyte;Xt_Myeloid progenitors;Xt_Placodal area	FALSE
Dr_scinlb;Xt_scin	Dr_scinlb;Xt_vill	0	0.300072	0.300072	Metazoa	Dr_Hatching gland	Xt_Hatching gland	TRUE
Xt_vill;Dr_vill	Xt_vill;Dr_scinlb	0	0.300072	0.300072	Metazoa	Dr_Hatching gland	Xt_Hatching gland	FALSE
Xt_vill;Dr_avil	Xt_vill;Dr_scinlb	0	0.300072	0.300072	Metazoa	Dr_Hatching gland	Xt_Hatching gland	FALSE
Xt_vill;Dr_vil1	Xt_vill;Dr_scinlb	0	0.300072	0.300072	Metazoa	Dr_Hatching gland	Xt_Hatching gland	FALSE
Xt_Xetrov90000734m;Dr_pdlim3b	Xt_Xetrov90000734m;Dr_ldb3b	0	0.859965	0.859965	Opisthokonta	Dr_Skeletal muscle	Xt_Skeletal muscle	FALSE
Xt_Xetrov90000734m;Dr_pdlim3a	Xt_Xetrov90000734m;Dr_ldb3b	0	0.859965	0.859965	Opisthokonta	Dr_Skeletal muscle	Xt_Skeletal muscle	FALSE
Xt_myh9;Dr_myh10	Xt_myh9;Dr_myh9a	0	0.792457	0.792457	Opisthokonta	Dr_Epidermal progenitor;Dr_Placodal area;Dr_Rare epidermal subtypes	Xt_Epidermal progenitor;Xt_Placodal area;Xt_Small secretory cells	FALSE
Xt_myh9;Dr_myh9b	Xt_myh9;Dr_myh9a	0.0202206	0.792457	0.772237	Opisthokonta	Dr_Epidermal progenitor;Dr_Placodal area;Dr_Rare epidermal subtypes	Xt_Epidermal progenitor;Xt_Placodal area;Xt_Small secretory cells	FALSE
Xt_myh9;Dr_LOC101884494	Xt_myh9;Dr_myh9a	0.066025	0.792457	0.726432	Opisthokonta	Dr_Epidermal progenitor;Dr_Placodal area;Dr_Rare epidermal subtypes	Xt_Epidermal progenitor;Xt_Placodal area;Xt_Small secretory cells	TRUE
Dr_foxl1;Xt_foxl1	Dr_foxl1;Xt_foxf1	0	0.634358	0.634358	Opisthokonta	Dr_Intermediate mesoderm	Xt_Intermediate mesoderm	FALSE
Xt_top1.2;Dr_top1	Xt_top1.2;Dr_zgc:173742	0	0.558974	0.558974	Opisthokonta	Dr_Blastula	Xt_Blastula	FALSE
Xt_kpna7;Dr_kpna2	Xt_kpna7;Dr_kpna4	0	0.533089	0.533089	Opisthokonta	Dr_Blastula;Dr_Dorsal organizer;Dr_Involuting marginal zone;Dr_Neuroectoderm;Dr_Non-neural ectoderm	Xt_Blastula;Xt_Involuting marginal zone;Xt_Neuroectoderm;Xt_Non-neural ectoderm;Xt_Spemann organizer	FALSE
Dr_tuba8l4;Xt_tubal3	Dr_tuba8l4;Xt_tuba3c	0	0.499142	0.499142	Opisthokonta	Dr_Blood;Dr_Endothelial;Dr_Eye primordium;Dr_Forebrain/midbrain;Dr_Hindbrain;Dr_Intermediate mesoderm;Dr_Neural crest;Dr_Optic;Dr_Rare epidermal subtypes;Dr_Tailbud	Xt_Blood;Xt_Endothelial;Xt_Eye primordium;Xt_Forebrain/midbrain;Xt_Hindbrain;Xt_Intermediate mesoderm;Xt_Neural crest;Xt_Optic;Xt_Pronephric mesenchyme;Xt_Small secretory cells	FALSE
Dr_tuba8l4;Xt_LOC100497157	Dr_tuba8l4;Xt_tuba3c	0	0.499142	0.499142	Opisthokonta	Dr_Blood;Dr_Endothelial;Dr_Eye primordium;Dr_Forebrain/midbrain;Dr_Hindbrain;Dr_Intermediate mesoderm;Dr_Neural crest;Dr_Optic;Dr_Rare epidermal subtypes;Dr_Tailbud	Xt_Blood;Xt_Endothelial;Xt_Eye primordium;Xt_Forebrain/midbrain;Xt_Hindbrain;Xt_Intermediate mesoderm;Xt_Neural crest;Xt_Optic;Xt_Pronephric mesenchyme;Xt_Small secretory cells	FALSE
Dr_tuba8l4;Xt_tuba1b	Dr_tuba8l4;Xt_tuba3c	0	0.499142	0.499142	Opisthokonta	Dr_Blood;Dr_Endothelial;Dr_Eye primordium;Dr_Forebrain/midbrain;Dr_Hindbrain;Dr_Intermediate mesoderm;Dr_Neural crest;Dr_Optic;Dr_Rare epidermal subtypes;Dr_Tailbud	Xt_Blood;Xt_Endothelial;Xt_Eye primordium;Xt_Forebrain/midbrain;Xt_Hindbrain;Xt_Intermediate mesoderm;Xt_Neural crest;Xt_Optic;Xt_Pronephric mesenchyme;Xt_Small secretory cells	FALSE
Dr_tuba8l4;Xt_Xetrov90024523m	Dr_tuba8l4;Xt_tuba3c	0	0.499142	0.499142	Opisthokonta	Dr_Blood;Dr_Endothelial;Dr_Eye primordium;Dr_Forebrain/midbrain;Dr_Hindbrain;Dr_Intermediate mesoderm;Dr_Neural crest;Dr_Optic;Dr_Rare epidermal subtypes;Dr_Tailbud	Xt_Blood;Xt_Endothelial;Xt_Eye primordium;Xt_Forebrain/midbrain;Xt_Hindbrain;Xt_Intermediate mesoderm;Xt_Neural crest;Xt_Optic;Xt_Pronephric mesenchyme;Xt_Small secretory cells	FALSE
Dr_tuba8l4;Xt_LOC100490289-like	Dr_tuba8l4;Xt_tuba3c	0	0.499142	0.499142	Opisthokonta	Dr_Blood;Dr_Endothelial;Dr_Eye primordium;Dr_Forebrain/midbrain;Dr_Hindbrain;Dr_Intermediate mesoderm;Dr_Neural crest;Dr_Optic;Dr_Rare epidermal subtypes;Dr_Tailbud	Xt_Blood;Xt_Endothelial;Xt_Eye primordium;Xt_Forebrain/midbrain;Xt_Hindbrain;Xt_Intermediate mesoderm;Xt_Neural crest;Xt_Optic;Xt_Pronephric mesenchyme;Xt_Small secretory cells	FALSE
Dr_tuba8l4;Xt_Xetrov90024521m	Dr_tuba8l4;Xt_tuba3c	0	0.499142	0.499142	Opisthokonta	Dr_Blood;Dr_Endothelial;Dr_Eye primordium;Dr_Forebrain/midbrain;Dr_Hindbrain;Dr_Intermediate mesoderm;Dr_Neural crest;Dr_Optic;Dr_Rare epidermal subtypes;Dr_Tailbud	Xt_Blood;Xt_Endothelial;Xt_Eye primordium;Xt_Forebrain/midbrain;Xt_Hindbrain;Xt_Intermediate mesoderm;Xt_Neural crest;Xt_Optic;Xt_Pronephric mesenchyme;Xt_Small secretory cells	FALSE
Dr_tuba8l4;Xt_LOC100497528	Dr_tuba8l4;Xt_tuba3c	0	0.499142	0.499142	Opisthokonta	Dr_Blood;Dr_Endothelial;Dr_Eye primordium;Dr_Forebrain/midbrain;Dr_Hindbrain;Dr_Intermediate mesoderm;Dr_Neural crest;Dr_Optic;Dr_Rare epidermal subtypes;Dr_Tailbud	Xt_Blood;Xt_Endothelial;Xt_Eye primordium;Xt_Forebrain/midbrain;Xt_Hindbrain;Xt_Intermediate mesoderm;Xt_Neural crest;Xt_Optic;Xt_Pronephric mesenchyme;Xt_Small secretory cells	FALSE
Dr_LOC565454;Xt_Xetrov90020242m	Dr_LOC565454;Xt_Xetrov90020358m	0.134483	0.631414	0.496931	Opisthokonta			TRUE
Xt_mef2a;Dr_mef2aa	Xt_mef2a;Dr_mef2d	0	0.489455	0.489455	Opisthokonta			FALSE
Xt_mef2a;Dr_mef2a	Xt_mef2a;Dr_mef2d	0	0.489455	0.489455	Opisthokonta			FALSE
Dr_tra2b;Xt_tra2b	Dr_tra2b;Xt_tra2a	0	0.449158	0.449158	Opisthokonta	Dr_Involuting marginal zone;Dr_Neuroectoderm;Dr_Non-neural ectoderm	Xt_Involuting marginal zone;Xt_Neuroectoderm;Xt_Non-neural ectoderm	FALSE
Xt_tubb2b;Dr_zgc:55461	Xt_tubb2b;Dr_tubb2	0	0.446243	0.446243	Opisthokonta	Dr_Neuron;Dr_Rohon-beard neuron	Xt_Neuron;Xt_Rohon-beard neuron	FALSE
Dr_zgc:65894;Xt_tubb4b	Dr_zgc:65894;Xt_tubb3	0.0595039	0.497419	0.437915	Opisthokonta	Dr_Neuron;Dr_Rohon-beard neuron	Xt_Neuron;Xt_Rohon-beard neuron	FALSE
Dr_arhgdia;Xt_arhgdia	Dr_arhgdia;Xt_arhgdig	0	0.42229	0.42229	Opisthokonta	Dr_Blood;Dr_Endothelial;Dr_Epidermal progenitor;Dr_Macrophage;Dr_Placodal area;Dr_Rare epidermal subtypes;Dr_Secretory epidermal	Xt_Blood;Xt_Cement gland primordium;Xt_Endothelial;Xt_Epidermal progenitor;Xt_Goblet cell;Xt_Hatching gland;Xt_Myeloid progenitors;Xt_Placodal area;Xt_Small secretory cells	FALSE
Xt_top1mt-like;Dr_top1	Xt_top1mt-like;Dr_zgc:173742	0	0.416542	0.416542	Opisthokonta			FALSE
Xt_top1.2;Dr_top1l	Xt_top1.2;Dr_zgc:173742	0.143577	0.558974	0.415397	Opisthokonta	Dr_Blastula	Xt_Blastula	FALSE
Xt_zic1;Dr_LOC103910057	Xt_zic1;Dr_zic3	0	0.409634	0.409634	Opisthokonta	Dr_Neuroectoderm;Dr_Presomitic mesoderm;Dr_Tailbud	Xt_Hindbrain;Xt_Neuroectoderm;Xt_Skeletal muscle	TRUE
Xt_pias1;Dr_LOC564496	Xt_pias1;Dr_pias4b	0	0.391168	0.391168	Opisthokonta	Dr_Blastula	Xt_Blastula	TRUE
Dr_cdc25b;Xt_cdc25b	Dr_cdc25b;Xt_cdc25c	0.0355684	0.421678	0.38611	Opisthokonta	Dr_Blastula;Dr_Involuting marginal zone;Dr_Neuroectoderm	Xt_Blastula;Xt_Involuting marginal zone;Xt_Neuroectoderm	FALSE
Dr_zgc:153426;Xt_tubb4b	Dr_zgc:153426;Xt_tubb3	0.107396	0.493485	0.386089	Opisthokonta	Dr_Neuron;Dr_Rohon-beard neuron	Xt_Neuron;Xt_Rohon-beard neuron	FALSE
Dr_pitx3;Xt_pitx3	Dr_pitx3;Xt_pitx1	0.0478851	0.43032	0.382435	Opisthokonta	Dr_Lens;Dr_Placodal area	Xt_Lens;Xt_Placodal area	FALSE
Dr_nipa2;Xt_nipa2	Dr_nipa2;Xt_nipal4	0.0638953	0.433328	0.369432	Opisthokonta	Dr_Blastula	Xt_Blastula	FALSE
Dr_zgc:65894;Xt_tubb	Dr_zgc:65894;Xt_tubb3	0.128667	0.497419	0.368752	Opisthokonta	Dr_Neuron;Dr_Rohon-beard neuron	Xt_Neuron;Xt_Rohon-beard neuron	FALSE
Xt_hmgb3;Dr_hmgb3a	Xt_hmgb3;Dr_hmgb2b	0.103835	0.470024	0.36619	Opisthokonta	Dr_Eye primordium;Dr_Forebrain/midbrain;Dr_Hindbrain;Dr_Intermediate mesoderm;Dr_Optic;Dr_Presomitic mesoderm;Dr_Tailbud	Xt_Eye primordium;Xt_Forebrain/midbrain;Xt_Hindbrain;Xt_Optic;Xt_Spemann organizer;Xt_Tailbud	FALSE
Xt_Xetrov90022616m;Dr_LOC100333322	Xt_Xetrov90022616m;Dr_LOC100329560	0	0.3654	0.3654	Opisthokonta			FALSE
Xt_Xetrov90022616m;Dr_hist2h2l	Xt_Xetrov90022616m;Dr_LOC100329560	0	0.3654	0.3654	Opisthokonta			FALSE
Xt_Xetrov90022616m;Dr_si:ch211-113a14.15	Xt_Xetrov90022616m;Dr_LOC100329560	0	0.3654	0.3654	Opisthokonta			FALSE
Xt_Xetrov90022616m;Dr_LOC100332744	Xt_Xetrov90022616m;Dr_LOC100329560	0	0.3654	0.3654	Opisthokonta			FALSE
Xt_Xetrov90022616m;Dr_zgc:112234	Xt_Xetrov90022616m;Dr_LOC100329560	0	0.3654	0.3654	Opisthokonta			FALSE
Xt_Xetrov90028256m;Dr_LOC100330556	Xt_Xetrov90028256m;Dr_LOC100329560	0	0.365181	0.365181	Opisthokonta			FALSE
Xt_Xetrov90028256m;Dr_LOC563490	Xt_Xetrov90028256m;Dr_LOC100329560	0	0.365181	0.365181	Opisthokonta			FALSE
Xt_Xetrov90028256m;Dr_LOC103911340	Xt_Xetrov90028256m;Dr_LOC100329560	0	0.365181	0.365181	Opisthokonta			FALSE
Xt_Xetrov90028256m;Dr_si:ch211-113a14.29	Xt_Xetrov90028256m;Dr_LOC100329560	0	0.365181	0.365181	Opisthokonta			FALSE
Xt_Xetrov90028256m;Dr_LOC100538106	Xt_Xetrov90028256m;Dr_LOC100329560	0	0.365181	0.365181	Opisthokonta			FALSE
Xt_Xetrov90028256m;Dr_LOC564421	Xt_Xetrov90028256m;Dr_LOC100329560	0	0.365181	0.365181	Opisthokonta			FALSE
Xt_Xetrov90028256m;Dr_si:ch211-113a14.15	Xt_Xetrov90028256m;Dr_LOC100329560	0	0.365181	0.365181	Opisthokonta			FALSE
Xt_Xetrov90028256m;Dr_LOC100333322	Xt_Xetrov90028256m;Dr_LOC100329560	0	0.365181	0.365181	Opisthokonta			FALSE
Xt_Xetrov90028256m;Dr_LOC100004810	Xt_Xetrov90028256m;Dr_LOC100329560	0	0.365181	0.365181	Opisthokonta			FALSE
Xt_Xetrov90028256m;Dr_LOC560748	Xt_Xetrov90028256m;Dr_LOC100329560	0	0.365181	0.365181	Opisthokonta			FALSE
Xt_Xetrov90028256m;Dr_LOC100332744	Xt_Xetrov90028256m;Dr_LOC100329560	0	0.365181	0.365181	Opisthokonta			FALSE
Xt_Xetrov90028256m;Dr_LOC100149997	Xt_Xetrov90028256m;Dr_LOC100329560	0	0.365181	0.365181	Opisthokonta			FALSE
Xt_Xetrov90028256m;Dr_zgc:112234	Xt_Xetrov90028256m;Dr_LOC100329560	0	0.365181	0.365181	Opisthokonta			FALSE
Xt_Xetrov90028256m;Dr_hist2h2l	Xt_Xetrov90028256m;Dr_LOC100329560	0	0.365181	0.365181	Opisthokonta			FALSE
Xt_Xetrov90028256m;Dr_LOC100536401	Xt_Xetrov90028256m;Dr_LOC100329560	0	0.365181	0.365181	Opisthokonta			FALSE
Xt_Xetrov90022616m;Dr_LOC100538106	Xt_Xetrov90022616m;Dr_LOC100329560	0.00123123	0.3654	0.364169	Opisthokonta			FALSE
Xt_Xetrov90028256m;Dr_LOC100000857	Xt_Xetrov90028256m;Dr_LOC100329560	0.00368082	0.365181	0.3615	Opisthokonta			FALSE
Xt_myo5b;Dr_myo5b	Xt_myo5b;Dr_si:dkey-110c1.10	0	0.358925	0.358925	Opisthokonta			FALSE
Dr_copz2;Xt_copz2	Dr_copz2;Xt_copz1	0	0.356721	0.356721	Opisthokonta	Dr_Epidermal progenitor;Dr_Hatching gland;Dr_Notochord;Dr_Placodal area	Xt_Epidermal progenitor;Xt_Hatching gland;Xt_Notochord	FALSE
Xt_Xetrov90028256m;Dr_LOC101884412	Xt_Xetrov90028256m;Dr_LOC100329560	0.0104566	0.365181	0.354725	Opisthokonta			FALSE
Xt_nabp2;Dr_LOC101882738	Xt_nabp2;Dr_nabp1b	0	0.351979	0.351979	Opisthokonta	Dr_Blastula;Dr_Involuting marginal zone;Dr_Neuroectoderm;Dr_Non-neural ectoderm	Xt_Blastula;Xt_Involuting marginal zone;Xt_Neuroectoderm;Xt_Non-neural ectoderm	FALSE
Xt_tuba1c;Dr_tuba2	Xt_tuba1c;Dr_tuba8l	0	0.349009	0.349009	Opisthokonta	Dr_Eye primordium;Dr_Forebrain/midbrain;Dr_Hindbrain;Dr_Macrophage;Dr_Neural crest;Dr_Optic;Dr_Placodal area;Dr_Tailbud	Xt_Eye primordium;Xt_Forebrain/midbrain;Xt_Hindbrain;Xt_Myeloid progenitors;Xt_Neural crest;Xt_Optic;Xt_Placodal area;Xt_Tailbud	FALSE
Xt_Xetrov90022616m;Dr_LOC100004810	Xt_Xetrov90022616m;Dr_LOC100329560	0.0179469	0.3654	0.347453	Opisthokonta			FALSE
Xt_Xetrov90022616m;Dr_LOC563490	Xt_Xetrov90022616m;Dr_LOC100329560	0.022014	0.3654	0.343386	Opisthokonta			FALSE
Xt_Xetrov90022616m;Dr_LOC100330556	Xt_Xetrov90022616m;Dr_LOC100329560	0.0221583	0.3654	0.343242	Opisthokonta			FALSE
Dr_tuba1b;Xt_Xetrov90024523m	Dr_tuba1b;Xt_tuba3c	0	0.342878	0.342878	Opisthokonta	Dr_Endothelial;Dr_Forebrain/midbrain;Dr_Hindbrain;Dr_Intermediate mesoderm;Dr_Macrophage;Dr_Neural crest;Dr_Optic	Xt_Endothelial;Xt_Eye primordium;Xt_Forebrain/midbrain;Xt_Hindbrain;Xt_Intermediate mesoderm;Xt_Myeloid progenitors;Xt_Neural crest;Xt_Optic;Xt_Pronephric mesenchyme	FALSE
Dr_tuba1b;Xt_Xetrov90024521m	Dr_tuba1b;Xt_tuba3c	0	0.342878	0.342878	Opisthokonta	Dr_Endothelial;Dr_Forebrain/midbrain;Dr_Hindbrain;Dr_Intermediate mesoderm;Dr_Macrophage;Dr_Neural crest;Dr_Optic	Xt_Endothelial;Xt_Eye primordium;Xt_Forebrain/midbrain;Xt_Hindbrain;Xt_Intermediate mesoderm;Xt_Myeloid progenitors;Xt_Neural crest;Xt_Optic;Xt_Pronephric mesenchyme	FALSE
Dr_tuba1b;Xt_LOC100497157	Dr_tuba1b;Xt_tuba3c	0	0.342878	0.342878	Opisthokonta	Dr_Endothelial;Dr_Forebrain/midbrain;Dr_Hindbrain;Dr_Intermediate mesoderm;Dr_Macrophage;Dr_Neural crest;Dr_Optic	Xt_Endothelial;Xt_Eye primordium;Xt_Forebrain/midbrain;Xt_Hindbrain;Xt_Intermediate mesoderm;Xt_Myeloid progenitors;Xt_Neural crest;Xt_Optic;Xt_Pronephric mesenchyme	FALSE
Dr_tuba1b;Xt_LOC100490289-like	Dr_tuba1b;Xt_tuba3c	0	0.342878	0.342878	Opisthokonta	Dr_Endothelial;Dr_Forebrain/midbrain;Dr_Hindbrain;Dr_Intermediate mesoderm;Dr_Macrophage;Dr_Neural crest;Dr_Optic	Xt_Endothelial;Xt_Eye primordium;Xt_Forebrain/midbrain;Xt_Hindbrain;Xt_Intermediate mesoderm;Xt_Myeloid progenitors;Xt_Neural crest;Xt_Optic;Xt_Pronephric mesenchyme	FALSE
Dr_tuba1b;Xt_tubal3	Dr_tuba1b;Xt_tuba3c	0	0.342878	0.342878	Opisthokonta	Dr_Endothelial;Dr_Forebrain/midbrain;Dr_Hindbrain;Dr_Intermediate mesoderm;Dr_Macrophage;Dr_Neural crest;Dr_Optic	Xt_Endothelial;Xt_Eye primordium;Xt_Forebrain/midbrain;Xt_Hindbrain;Xt_Intermediate mesoderm;Xt_Myeloid progenitors;Xt_Neural crest;Xt_Optic;Xt_Pronephric mesenchyme	FALSE
Xt_Xetrov90028256m;Dr_LOC564549	Xt_Xetrov90028256m;Dr_LOC100329560	0.0223781	0.365181	0.342803	Opisthokonta			FALSE
Xt_Xetrov90022616m;Dr_LOC564421	Xt_Xetrov90022616m;Dr_LOC100329560	0.0240114	0.3654	0.341389	Opisthokonta			FALSE
Dr_mef2d;Xt_Xetrov90022298m	Dr_mef2d;Xt_mef2a	0.148741	0.489455	0.340713	Opisthokonta			FALSE
Xt_Xetrov90022616m;Dr_LOC103911340	Xt_Xetrov90022616m;Dr_LOC100329560	0.0256936	0.3654	0.339706	Opisthokonta			FALSE
Xt_tuba1c;Dr_tuba7l	Xt_tuba1c;Dr_tuba8l	0.0105499	0.349009	0.338459	Opisthokonta	Dr_Eye primordium;Dr_Forebrain/midbrain;Dr_Hindbrain;Dr_Macrophage;Dr_Neural crest;Dr_Optic;Dr_Placodal area;Dr_Tailbud	Xt_Eye primordium;Xt_Forebrain/midbrain;Xt_Hindbrain;Xt_Myeloid progenitors;Xt_Neural crest;Xt_Optic;Xt_Placodal area;Xt_Tailbud	FALSE
Xt_nipal4;Dr_nipal4	Xt_nipal4;Dr_nipa2	0.0973194	0.433328	0.336008	Opisthokonta	Dr_Blastula	Xt_Blastula	FALSE
Xt_tuba1c;Dr_tuba8l3	Xt_tuba1c;Dr_tuba8l	0.0137455	0.349009	0.335264	Opisthokonta	Dr_Eye primordium;Dr_Forebrain/midbrain;Dr_Hindbrain;Dr_Macrophage;Dr_Neural crest;Dr_Optic;Dr_Placodal area;Dr_Tailbud	Xt_Eye primordium;Xt_Forebrain/midbrain;Xt_Hindbrain;Xt_Myeloid progenitors;Xt_Neural crest;Xt_Optic;Xt_Placodal area;Xt_Tailbud	FALSE
Xt_Xetrov90022616m;Dr_LOC560748	Xt_Xetrov90022616m;Dr_LOC100329560	0.0374297	0.3654	0.32797	Opisthokonta			FALSE
Dr_LOC565454;Xt_LOC100497952-like.1	Dr_LOC565454;Xt_Xetrov90020358m	0.307809	0.631414	0.323605	Opisthokonta			TRUE
Xt_pias1;Dr_pias1b	Xt_pias1;Dr_pias4b	0.0679319	0.391168	0.323236	Opisthokonta	Dr_Blastula	Xt_Blastula	FALSE
Xt_pitx1;Dr_pitx1	Xt_pitx1;Dr_pitx3	0.112655	0.43032	0.317666	Opisthokonta	Dr_Lens;Dr_Placodal area	Xt_Lens;Xt_Placodal area	FALSE
Xt_top1mt-like;Dr_top1l	Xt_top1mt-like;Dr_zgc:173742	0.099658	0.416542	0.316884	Opisthokonta			FALSE
Xt_tuba1c;Dr_si:ch73-199e17.1	Xt_tuba1c;Dr_tuba8l	0.0337337	0.349009	0.315275	Opisthokonta	Dr_Eye primordium;Dr_Forebrain/midbrain;Dr_Hindbrain;Dr_Macrophage;Dr_Neural crest;Dr_Optic;Dr_Placodal area;Dr_Tailbud	Xt_Eye primordium;Xt_Forebrain/midbrain;Xt_Hindbrain;Xt_Myeloid progenitors;Xt_Neural crest;Xt_Optic;Xt_Placodal area;Xt_Tailbud	FALSE
Xt_ppp1r3c.2;Dr_ppp1r3ca	Xt_ppp1r3c.2;Dr_zgc:77112	0.195658	0.509092	0.313434	Opisthokonta	Dr_Blastula	Xt_Blastula	FALSE
Dr_tuba1b;Xt_LOC100497528	Dr_tuba1b;Xt_tuba3c	0.0299417	0.342878	0.312936	Opisthokonta	Dr_Endothelial;Dr_Forebrain/midbrain;Dr_Hindbrain;Dr_Intermediate mesoderm;Dr_Macrophage;Dr_Neural crest;Dr_Optic	Xt_Endothelial;Xt_Eye primordium;Xt_Forebrain/midbrain;Xt_Hindbrain;Xt_Intermediate mesoderm;Xt_Myeloid progenitors;Xt_Neural crest;Xt_Optic;Xt_Pronephric mesenchyme	FALSE
Dr_zgc:113983;Xt_Xetrov90022557m	Dr_zgc:113983;Xt_Xetrov90025560m	0	0.309777	0.309777	Opisthokonta			TRUE
Dr_zgc:113983;Xt_Xetrov90022572m	Dr_zgc:113983;Xt_Xetrov90025560m	0	0.309777	0.309777	Opisthokonta			TRUE
Dr_zgc:113983;Xt_Xetrov90022539m	Dr_zgc:113983;Xt_Xetrov90025560m	0	0.309777	0.309777	Opisthokonta			TRUE
Dr_zgc:113983;Xt_Xetrov90022581m	Dr_zgc:113983;Xt_Xetrov90025560m	0	0.309777	0.309777	Opisthokonta			TRUE
Dr_zgc:113983;Xt_Xetrov90009609m	Dr_zgc:113983;Xt_Xetrov90025560m	0	0.309777	0.309777	Opisthokonta			TRUE
Dr_zgc:113983;Xt_Xetrov90022578m	Dr_zgc:113983;Xt_Xetrov90025560m	0	0.309777	0.309777	Opisthokonta			TRUE
Xt_Xetrov90025560m;Dr_h3f3c	Xt_Xetrov90025560m;Dr_zgc:113983	0	0.309777	0.309777	Opisthokonta			FALSE
Dr_zgc:113983;Xt_Xetrov90022586m	Dr_zgc:113983;Xt_Xetrov90025560m	0	0.309777	0.309777	Opisthokonta			TRUE
Dr_zgc:113983;Xt_Xetrov90022590m	Dr_zgc:113983;Xt_Xetrov90025560m	0	0.309777	0.309777	Opisthokonta			TRUE
Dr_zgc:113983;Xt_Xetrov90028677m	Dr_zgc:113983;Xt_Xetrov90025560m	0	0.309777	0.309777	Opisthokonta			TRUE
Dr_zgc:113983;Xt_Xetrov90022605m	Dr_zgc:113983;Xt_Xetrov90025560m	0	0.309777	0.309777	Opisthokonta			TRUE
Dr_zgc:113983;Xt_Xetrov90022608m	Dr_zgc:113983;Xt_Xetrov90025560m	0	0.309777	0.309777	Opisthokonta			TRUE
Dr_zgc:113983;Xt_Xetrov90022526m	Dr_zgc:113983;Xt_Xetrov90025560m	0	0.309777	0.309777	Opisthokonta			TRUE
Xt_Xetrov90025560m;Dr_h3f3a	Xt_Xetrov90025560m;Dr_zgc:113983	0	0.309777	0.309777	Opisthokonta			FALSE
Dr_zgc:113983;Xt_Xetrov90022518m	Dr_zgc:113983;Xt_Xetrov90025560m	0	0.309777	0.309777	Opisthokonta			TRUE
Dr_zgc:113983;Xt_Xetrov90022514m	Dr_zgc:113983;Xt_Xetrov90025560m	0	0.309777	0.309777	Opisthokonta			TRUE
Dr_zgc:113983;Xt_Xetrov90028257m	Dr_zgc:113983;Xt_Xetrov90025560m	0	0.309777	0.309777	Opisthokonta			TRUE
Dr_zgc:113983;Xt_Xetrov90009606m	Dr_zgc:113983;Xt_Xetrov90025560m	0	0.309777	0.309777	Opisthokonta			FALSE
Dr_zgc:113983;Xt_Xetrov90028258m	Dr_zgc:113983;Xt_Xetrov90025560m	0	0.309777	0.309777	Opisthokonta			TRUE
Dr_zgc:113983;Xt_Xetrov90028252m	Dr_zgc:113983;Xt_Xetrov90025560m	0	0.309777	0.309777	Opisthokonta			TRUE
Dr_zgc:113983;Xt_Xetrov90015423m	Dr_zgc:113983;Xt_Xetrov90025560m	0	0.309777	0.309777	Opisthokonta			TRUE
Dr_zgc:113983;Xt_Xetrov90015432m	Dr_zgc:113983;Xt_Xetrov90025560m	0	0.309777	0.309777	Opisthokonta			TRUE
Dr_zgc:113983;Xt_Xetrov90015441m	Dr_zgc:113983;Xt_Xetrov90025560m	0	0.309777	0.309777	Opisthokonta			TRUE
Dr_zgc:113983;Xt_Xetrov90022502m	Dr_zgc:113983;Xt_Xetrov90025560m	0	0.309777	0.309777	Opisthokonta			FALSE
Dr_zgc:113983;Xt_Xetrov90009639m	Dr_zgc:113983;Xt_Xetrov90025560m	0	0.309777	0.309777	Opisthokonta			TRUE
Dr_zgc:113983;Xt_Xetrov90009630m	Dr_zgc:113983;Xt_Xetrov90025560m	0	0.309777	0.309777	Opisthokonta			TRUE
Xt_Xetrov90025560m;Dr_h3f3b.1	Xt_Xetrov90025560m;Dr_zgc:113983	0	0.309777	0.309777	Opisthokonta			FALSE
Dr_zgc:113983;Xt_Xetrov90009627m	Dr_zgc:113983;Xt_Xetrov90025560m	0	0.309777	0.309777	Opisthokonta			TRUE
Dr_zgc:113983;Xt_Xetrov90022509m	Dr_zgc:113983;Xt_Xetrov90025560m	0	0.309777	0.309777	Opisthokonta			TRUE
Xt_Xetrov90025560m;Dr_h3f3d	Xt_Xetrov90025560m;Dr_zgc:113983	0	0.309777	0.309777	Opisthokonta			FALSE
Dr_zgc:113983;Xt_Xetrov90022510m	Dr_zgc:113983;Xt_Xetrov90025560m	0	0.309777	0.309777	Opisthokonta			FALSE
Dr_zgc:113983;Xt_Xetrov90009622m	Dr_zgc:113983;Xt_Xetrov90025560m	0	0.309777	0.309777	Opisthokonta			TRUE
Dr_zgc:113983;Xt_Xetrov90009616m	Dr_zgc:113983;Xt_Xetrov90025560m	0	0.309777	0.309777	Opisthokonta			TRUE
Dr_zgc:113983;Xt_Xetrov90015404m	Dr_zgc:113983;Xt_Xetrov90025560m	0	0.309777	0.309777	Opisthokonta			FALSE
Dr_zgc:113983;Xt_Xetrov90009615m	Dr_zgc:113983;Xt_Xetrov90025560m	0	0.309777	0.309777	Opisthokonta			FALSE
Dr_zgc:113983;Xt_Xetrov90028674m	Dr_zgc:113983;Xt_Xetrov90025560m	0	0.309777	0.309777	Opisthokonta			TRUE
Dr_zgc:113983;Xt_Xetrov90006490m	Dr_zgc:113983;Xt_Xetrov90025560m	0	0.309777	0.309777	Opisthokonta			FALSE
Dr_zgc:113983;Xt_Xetrov90029514m	Dr_zgc:113983;Xt_Xetrov90025560m	0	0.309777	0.309777	Opisthokonta			FALSE
Dr_zgc:113983;Xt_Xetrov90029350m	Dr_zgc:113983;Xt_Xetrov90025560m	0	0.309777	0.309777	Opisthokonta			TRUE
Dr_zgc:113983;Xt_hist2h3c	Dr_zgc:113983;Xt_Xetrov90025560m	0	0.309777	0.309777	Opisthokonta			TRUE
Dr_zgc:113983;Xt_hist1h3g	Dr_zgc:113983;Xt_Xetrov90025560m	0	0.309777	0.309777	Opisthokonta			FALSE
Xt_Xetrov90025560m;Dr_si:ch1073-429i10.3	Xt_Xetrov90025560m;Dr_zgc:113983	0	0.309777	0.309777	Opisthokonta			FALSE
Dr_zgc:113983;Xt_Xetrov90029539m	Dr_zgc:113983;Xt_Xetrov90025560m	0	0.309777	0.309777	Opisthokonta			TRUE
Dr_zgc:113983;Xt_Xetrov90029537m	Dr_zgc:113983;Xt_Xetrov90025560m	0	0.309777	0.309777	Opisthokonta			TRUE
Dr_zgc:113983;Xt_Xetrov90029535m	Dr_zgc:113983;Xt_Xetrov90025560m	0	0.309777	0.309777	Opisthokonta			FALSE
Dr_zgc:113983;Xt_Xetrov90009585m	Dr_zgc:113983;Xt_Xetrov90025560m	0	0.309777	0.309777	Opisthokonta			TRUE
Dr_zgc:113983;Xt_Xetrov90029510m	Dr_zgc:113983;Xt_Xetrov90025560m	0	0.309777	0.309777	Opisthokonta			TRUE
Dr_zgc:113983;Xt_Xetrov90029508m	Dr_zgc:113983;Xt_Xetrov90025560m	0	0.309777	0.309777	Opisthokonta			TRUE
Dr_zgc:113983;Xt_LOC100487130	Dr_zgc:113983;Xt_Xetrov90025560m	0	0.309777	0.309777	Opisthokonta			TRUE
Dr_zgc:113983;Xt_LOC101732683	Dr_zgc:113983;Xt_Xetrov90025560m	0	0.309777	0.309777	Opisthokonta			TRUE
Dr_zgc:113983;Xt_LOC101733986	Dr_zgc:113983;Xt_Xetrov90025560m	0	0.309777	0.309777	Opisthokonta			TRUE
Dr_zgc:113983;Xt_Xetrov90022610m	Dr_zgc:113983;Xt_Xetrov90025560m	0	0.309777	0.309777	Opisthokonta			TRUE
Dr_zgc:113983;Xt_Xetrov90029324m	Dr_zgc:113983;Xt_Xetrov90025560m	0	0.309777	0.309777	Opisthokonta			TRUE
Dr_zgc:113983;Xt_Xetrov90022614m	Dr_zgc:113983;Xt_Xetrov90025560m	0	0.309777	0.309777	Opisthokonta			TRUE
Dr_zgc:113983;Xt_Xetrov90009580m	Dr_zgc:113983;Xt_Xetrov90025560m	0	0.309777	0.309777	Opisthokonta			TRUE
Dr_zgc:113983;Xt_Xetrov90006495m	Dr_zgc:113983;Xt_Xetrov90025560m	0	0.309777	0.309777	Opisthokonta			TRUE
Xt_Xetrov90022616m;Dr_si:ch211-113a14.29	Xt_Xetrov90022616m;Dr_LOC100329560	0.0575287	0.3654	0.307871	Opisthokonta			FALSE
Dr_cebpa;Xt_cebpa	Dr_cebpa;Xt_cebpb	0	0.307468	0.307468	Opisthokonta	Dr_Macrophage	Xt_Myeloid progenitors	TRUE
Xt_Xetrov90022616m;Dr_LOC100149997	Xt_Xetrov90022616m;Dr_LOC100329560	0.0602348	0.3654	0.305165	Opisthokonta			FALSE
Xt_Xetrov90022616m;Dr_LOC100536401	Xt_Xetrov90022616m;Dr_LOC100329560	0.0614073	0.3654	0.303993	Opisthokonta			FALSE
Xt_hba3;Dr_si:ch211-5k11.6	Xt_hba3;Dr_hbbe3	0	0.954636	0.954636	Eukaryota	Dr_Blood	Xt_Blood	TRUE
Xt_tnni1.2;Dr_zgc:112242	Xt_tnni1.2;Dr_tnni2b.1	0	0.950824	0.950824	Eukaryota	Dr_Presomitic mesoderm;Dr_Skeletal muscle	Xt_Skeletal muscle	FALSE
Xt_tnni2;Dr_tnni2a.1	Xt_tnni2;Dr_tnni2b.1	0	0.926745	0.926745	Eukaryota	Dr_Presomitic mesoderm;Dr_Skeletal muscle	Xt_Skeletal muscle	FALSE
Xt_emilin3;Dr_emilin3	Xt_emilin3;Dr_emilin3a	0	0.922747	0.922747	Eukaryota	Dr_Notochord	Xt_Notochord	FALSE
Xt_LOC100495470;Dr_LOC100536949	Xt_LOC100495470;Dr_si:dkey-65b12.6	0	0.904417	0.904417	Eukaryota	Dr_Secretory epidermal	Xt_Cement gland primordium	FALSE
Xt_LOC100495470;Dr_LOC101886317	Xt_LOC100495470;Dr_si:dkey-65b12.6	0	0.904417	0.904417	Eukaryota	Dr_Secretory epidermal	Xt_Cement gland primordium	FALSE
Dr_si:dkey-65b12.6;Xt_LOC101732634	Dr_si:dkey-65b12.6;Xt_LOC100495470	0	0.904417	0.904417	Eukaryota	Dr_Secretory epidermal	Xt_Cement gland primordium	FALSE
Dr_si:dkey-65b12.6;Xt_LOC100495886	Dr_si:dkey-65b12.6;Xt_LOC100495470	0	0.904417	0.904417	Eukaryota	Dr_Secretory epidermal	Xt_Cement gland primordium	FALSE
Xt_LOC100495470;Dr_LOC103909815	Xt_LOC100495470;Dr_si:dkey-65b12.6	0	0.904417	0.904417	Eukaryota	Dr_Secretory epidermal	Xt_Cement gland primordium	FALSE
Dr_si:dkey-65b12.6;Xt_LOC100489882	Dr_si:dkey-65b12.6;Xt_LOC100495470	0	0.904417	0.904417	Eukaryota	Dr_Secretory epidermal	Xt_Cement gland primordium	TRUE
Xt_LOC100495470;Dr_muc2	Xt_LOC100495470;Dr_si:dkey-65b12.6	0	0.904417	0.904417	Eukaryota	Dr_Secretory epidermal	Xt_Cement gland primordium	FALSE
Xt_LOC100495470;Dr_LOC100332798	Xt_LOC100495470;Dr_si:dkey-65b12.6	0	0.904417	0.904417	Eukaryota	Dr_Secretory epidermal	Xt_Cement gland primordium	FALSE
Dr_si:dkey-65b12.6;Xt_LOC101735028	Dr_si:dkey-65b12.6;Xt_LOC100495470	0	0.904417	0.904417	Eukaryota	Dr_Secretory epidermal	Xt_Cement gland primordium	FALSE
Dr_si:dkey-65b12.6;Xt_fcgbp	Dr_si:dkey-65b12.6;Xt_LOC100495470	0	0.904417	0.904417	Eukaryota	Dr_Secretory epidermal	Xt_Cement gland primordium	FALSE
Xt_LOC100495470;Dr_LOC101885726	Xt_LOC100495470;Dr_si:dkey-65b12.6	0	0.904417	0.904417	Eukaryota	Dr_Secretory epidermal	Xt_Cement gland primordium	TRUE
Xt_LOC100495470;Dr_LOC100149773	Xt_LOC100495470;Dr_si:dkey-65b12.6	0	0.904417	0.904417	Eukaryota	Dr_Secretory epidermal	Xt_Cement gland primordium	TRUE
Dr_si:dkey-65b12.6;Xt_Xetrov90019631m	Dr_si:dkey-65b12.6;Xt_LOC100495470	0	0.904417	0.904417	Eukaryota	Dr_Secretory epidermal	Xt_Cement gland primordium	FALSE
Xt_LOC100495470;Dr_muc5b	Xt_LOC100495470;Dr_si:dkey-65b12.6	0	0.904417	0.904417	Eukaryota	Dr_Secretory epidermal	Xt_Cement gland primordium	FALSE
Xt_LOC100495470;Dr_LOC101885543	Xt_LOC100495470;Dr_si:dkey-65b12.6	0	0.904417	0.904417	Eukaryota	Dr_Secretory epidermal	Xt_Cement gland primordium	TRUE
Xt_LOC100495470;Dr_LOC100334291	Xt_LOC100495470;Dr_si:dkey-65b12.6	0	0.904417	0.904417	Eukaryota	Dr_Secretory epidermal	Xt_Cement gland primordium	FALSE
Dr_si:dkey-65b12.6;Xt_LOC100493184	Dr_si:dkey-65b12.6;Xt_LOC100495470	0	0.904417	0.904417	Eukaryota	Dr_Secretory epidermal	Xt_Cement gland primordium	FALSE
Dr_si:dkey-65b12.6;Xt_Xetrov90019630m	Dr_si:dkey-65b12.6;Xt_LOC100495470	0	0.904417	0.904417	Eukaryota	Dr_Secretory epidermal	Xt_Cement gland primordium	FALSE
Xt_LOC100495470;Dr_LOC101884713	Xt_LOC100495470;Dr_si:dkey-65b12.6	0	0.904417	0.904417	Eukaryota	Dr_Secretory epidermal	Xt_Cement gland primordium	TRUE
Dr_si:dkey-65b12.6;Xt_LOC100492852	Dr_si:dkey-65b12.6;Xt_LOC100495470	0	0.904417	0.904417	Eukaryota	Dr_Secretory epidermal	Xt_Cement gland primordium	FALSE
Xt_hba3;Dr_si:ch211-5k11.6	Xt_hba3;Dr_zgc:163057	0	0.898187	0.898187	Eukaryota	Dr_Blood	Xt_Blood	TRUE
Dr_mmp13a;Xt_LOC100489571	Dr_mmp13a;Xt_mmp7	0	0.878098	0.878098	Eukaryota	Dr_Macrophage	Xt_Myeloid progenitors	FALSE
Dr_mmp13a;Xt_LOC100489735	Dr_mmp13a;Xt_mmp7	0	0.878098	0.878098	Eukaryota	Dr_Macrophage	Xt_Myeloid progenitors	TRUE
Dr_mmp13a;Xt_LOC100491214	Dr_mmp13a;Xt_mmp7	0	0.878098	0.878098	Eukaryota	Dr_Macrophage	Xt_Myeloid progenitors	TRUE
Dr_mmp13a;Xt_LOC100491547	Dr_mmp13a;Xt_mmp7	0	0.878098	0.878098	Eukaryota	Dr_Macrophage	Xt_Myeloid progenitors	TRUE
Dr_mmp13a;Xt_LOC100494588	Dr_mmp13a;Xt_mmp7	0	0.878098	0.878098	Eukaryota	Dr_Macrophage	Xt_Myeloid progenitors	TRUE
Dr_mmp13a;Xt_mmp1	Dr_mmp13a;Xt_mmp7	0	0.878098	0.878098	Eukaryota	Dr_Macrophage	Xt_Myeloid progenitors	FALSE
Xt_tekt3;Dr_tekt3	Xt_tekt3;Dr_tekt4	0	0.877008	0.877008	Eukaryota			TRUE
Xt_hba-l5;Dr_si:ch211-5k11.6	Xt_hba-l5;Dr_MGC173646	0	0.849482	0.849482	Eukaryota	Dr_Blood	Xt_Blood	TRUE
Dr_zgc:173915;Xt_LOC101731491	Dr_zgc:173915;Xt_MGC107908	0	0.843469	0.843469	Eukaryota			FALSE
Dr_zgc:173915;Xt_LOC100488644	Dr_zgc:173915;Xt_MGC107908	0	0.843469	0.843469	Eukaryota			FALSE
Dr_zgc:173915;Xt_LOC100488329	Dr_zgc:173915;Xt_MGC107908	0	0.843469	0.843469	Eukaryota			FALSE
Xt_hba-l5;Dr_si:ch211-5k11.6	Xt_hba-l5;Dr_si:ch211-5k11.12	0	0.843407	0.843407	Eukaryota	Dr_Blood	Xt_Blood	TRUE
Dr_LOC100536659;Xt_chrne	Dr_LOC100536659;Xt_chrna1.2	0	0.842128	0.842128	Eukaryota	Dr_Skeletal muscle	Xt_Skeletal muscle	FALSE
Xt_hba-l5;Dr_si:ch211-5k11.6	Xt_hba-l5;Dr_hbbe3	0	0.837907	0.837907	Eukaryota	Dr_Blood	Xt_Blood	TRUE
Dr_LOC100536659;Xt_chrne	Dr_LOC100536659;Xt_chrnd	0	0.836266	0.836266	Eukaryota	Dr_Skeletal muscle	Xt_Skeletal muscle	FALSE
Dr_spi1b;Xt_spi1	Dr_spi1b;Xt_spib	0	0.834172	0.834172	Eukaryota	Dr_Macrophage	Xt_Myeloid progenitors	TRUE
Xt_hba-l5;Dr_si:ch211-5k11.6	Xt_hba-l5;Dr_hbbe2	0	0.833071	0.833071	Eukaryota	Dr_Blood	Xt_Blood	TRUE
Dr_col9a1b;Xt_Xetrov90014310m	Dr_col9a1b;Xt_col9a3	0	0.830542	0.830542	Eukaryota	Dr_Notochord	Xt_Notochord	FALSE
Dr_col9a1b;Xt_LOC101731071	Dr_col9a1b;Xt_col9a3	0	0.830542	0.830542	Eukaryota	Dr_Notochord	Xt_Notochord	TRUE
Xt_smyd1;Dr_smyd1a	Xt_smyd1;Dr_smyd2b	0	0.827438	0.827438	Eukaryota	Dr_Presomitic mesoderm;Dr_Skeletal muscle	Xt_Skeletal muscle	TRUE
Dr_pdlim5b;Xt_pdlim5	Dr_pdlim5b;Xt_Xetrov90000734m	0	0.824967	0.824967	Eukaryota			FALSE
Xt_Xetrov90000734m;Dr_pdlim3a	Xt_Xetrov90000734m;Dr_pdlim5b	0	0.824967	0.824967	Eukaryota			FALSE
Xt_Xetrov90000734m;Dr_pdlim3b	Xt_Xetrov90000734m;Dr_pdlim5b	0	0.824967	0.824967	Eukaryota			FALSE
Xt_rac2;Dr_si:ch211-1f22.2	Xt_rac2;Dr_rhogb	0	0.821167	0.821167	Eukaryota	Dr_Macrophage	Xt_Myeloid progenitors	FALSE
Dr_rhogb;Xt_rhog-like.2	Dr_rhogb;Xt_rac2	0	0.821167	0.821167	Eukaryota	Dr_Macrophage	Xt_Myeloid progenitors	TRUE
Dr_rhogb;Xt_rhog-like.1	Dr_rhogb;Xt_rac2	0	0.821167	0.821167	Eukaryota	Dr_Macrophage	Xt_Myeloid progenitors	FALSE
Xt_rac2;Dr_rac3b	Xt_rac2;Dr_rhogb	0	0.821167	0.821167	Eukaryota	Dr_Macrophage	Xt_Myeloid progenitors	FALSE
Xt_rac2;Dr_rac1b	Xt_rac2;Dr_rhogb	0	0.821167	0.821167	Eukaryota	Dr_Macrophage	Xt_Myeloid progenitors	FALSE
Xt_rac2;Dr_rac1a	Xt_rac2;Dr_rhogb	0	0.821167	0.821167	Eukaryota	Dr_Macrophage	Xt_Myeloid progenitors	FALSE
Xt_rac2;Dr_rac3a	Xt_rac2;Dr_rhogb	0	0.821167	0.821167	Eukaryota	Dr_Macrophage	Xt_Myeloid progenitors	FALSE
Xt_rac2;Dr_rac1l	Xt_rac2;Dr_rhogb	0	0.821167	0.821167	Eukaryota	Dr_Macrophage	Xt_Myeloid progenitors	FALSE
Xt_rac2;Dr_LOC100537765	Xt_rac2;Dr_rhogb	0	0.821167	0.821167	Eukaryota	Dr_Macrophage	Xt_Myeloid progenitors	FALSE
Xt_rac2;Dr_si:ch211-1f22.1	Xt_rac2;Dr_rhogb	0	0.821167	0.821167	Eukaryota	Dr_Macrophage	Xt_Myeloid progenitors	TRUE
Xt_hbz;Dr_si:ch211-5k11.6	Xt_hbz;Dr_hbbe3	0	0.810858	0.810858	Eukaryota	Dr_Blood	Xt_Blood	TRUE
Xt_hba-l5;Dr_si:ch211-5k11.6	Xt_hba-l5;Dr_hbbe1.1	0	0.807584	0.807584	Eukaryota	Dr_Blood	Xt_Blood	TRUE
Xt_hbz;Dr_si:ch211-5k11.6	Xt_hbz;Dr_MGC173646	0	0.803561	0.803561	Eukaryota	Dr_Blood	Xt_Blood	TRUE
Xt_myh4;Dr_myhb	Xt_myh4;Dr_myhz2	0	0.800452	0.800452	Eukaryota	Dr_Skeletal muscle	Xt_Skeletal muscle	FALSE
Xt_myh4;Dr_LOC100537594	Xt_myh4;Dr_myhz2	0	0.800452	0.800452	Eukaryota	Dr_Skeletal muscle	Xt_Skeletal muscle	FALSE
Xt_myh4;Dr_zgc:66156	Xt_myh4;Dr_myhz2	0	0.800452	0.800452	Eukaryota	Dr_Skeletal muscle	Xt_Skeletal muscle	TRUE
Xt_myh4;Dr_wu:fd14a01	Xt_myh4;Dr_myhz2	0	0.800452	0.800452	Eukaryota	Dr_Skeletal muscle	Xt_Skeletal muscle	FALSE
Xt_myl4;Dr_myl4	Xt_myl4;Dr_myl13	0	0.799145	0.799145	Eukaryota	Dr_Skeletal muscle	Xt_Skeletal muscle	FALSE
Dr_samsn1a;Xt_samsn1	Dr_samsn1a;Xt_sash3	0	0.798606	0.798606	Eukaryota	Dr_Macrophage	Xt_Myeloid progenitors	TRUE
Xt_sash3;Dr_sash3	Xt_sash3;Dr_samsn1a	0	0.798606	0.798606	Eukaryota	Dr_Macrophage	Xt_Myeloid progenitors	FALSE
Dr_mmp13a;Xt_LOC100489735	Dr_mmp13a;Xt_mmp9	0	0.793725	0.793725	Eukaryota	Dr_Macrophage	Xt_Myeloid progenitors	TRUE
Dr_mmp13a;Xt_LOC100494588	Dr_mmp13a;Xt_mmp9	0	0.793725	0.793725	Eukaryota	Dr_Macrophage	Xt_Myeloid progenitors	TRUE
Dr_mmp13a;Xt_LOC100491547	Dr_mmp13a;Xt_mmp9	0	0.793725	0.793725	Eukaryota	Dr_Macrophage	Xt_Myeloid progenitors	TRUE
Dr_mmp13a;Xt_mmp1	Dr_mmp13a;Xt_mmp9	0	0.793725	0.793725	Eukaryota	Dr_Macrophage	Xt_Myeloid progenitors	FALSE
Dr_mmp13a;Xt_LOC100491214	Dr_mmp13a;Xt_mmp9	0	0.793725	0.793725	Eukaryota	Dr_Macrophage	Xt_Myeloid progenitors	TRUE
Dr_mmp13a;Xt_LOC100489571	Dr_mmp13a;Xt_mmp9	0	0.793725	0.793725	Eukaryota	Dr_Macrophage	Xt_Myeloid progenitors	FALSE
Xt_mmp9;Dr_mmp9	Xt_mmp9;Dr_mmp13a	0	0.793725	0.793725	Eukaryota	Dr_Macrophage	Xt_Myeloid progenitors	FALSE
Xt_ca2;Dr_cahz	Xt_ca2;Dr_ca15a	0	0.789999	0.789999	Eukaryota	Dr_Ionocyte	Xt_Ionocyte	FALSE
Xt_ldb3-like.2;Dr_ldb3a	Xt_ldb3-like.2;Dr_LOC103910026	0	0.788454	0.788454	Eukaryota	Dr_Skeletal muscle	Xt_Skeletal muscle	FALSE
Dr_LOC103910026;Xt_pdlim7	Dr_LOC103910026;Xt_ldb3-like.2	0	0.788454	0.788454	Eukaryota	Dr_Skeletal muscle	Xt_Skeletal muscle	FALSE
Xt_hbz;Dr_si:ch211-5k11.6	Xt_hbz;Dr_hbbe2	0	0.784656	0.784656	Eukaryota	Dr_Blood	Xt_Blood	TRUE
Xt_hbz;Dr_si:ch211-5k11.6	Xt_hbz;Dr_hbbe1.1	0	0.782569	0.782569	Eukaryota	Dr_Blood	Xt_Blood	TRUE
Dr_col9a1b;Xt_LOC101731071	Dr_col9a1b;Xt_col5a1-like	0	0.775621	0.775621	Eukaryota	Dr_Notochord;Dr_Notoplate	Xt_Notochord;Xt_Notoplate	TRUE
Dr_col9a1b;Xt_Xetrov90014310m	Dr_col9a1b;Xt_col5a1-like	0	0.775621	0.775621	Eukaryota	Dr_Notochord;Dr_Notoplate	Xt_Notochord;Xt_Notoplate	FALSE
Xt_hba-l5;Dr_si:ch211-5k11.6	Xt_hba-l5;Dr_zgc:163057	0	0.765059	0.765059	Eukaryota	Dr_Blood	Xt_Blood	TRUE
Xt_ca12;Dr_ca12	Xt_ca12;Dr_zgc:153760	0	0.764155	0.764155	Eukaryota	Dr_Ionocyte	Xt_Ionocyte	FALSE
Xt_ca12;Dr_ca12	Xt_ca12;Dr_ca15a	0	0.762746	0.762746	Eukaryota	Dr_Ionocyte	Xt_Ionocyte	FALSE
Xt_ca2;Dr_cahz	Xt_ca2;Dr_zgc:153760	0	0.760813	0.760813	Eukaryota	Dr_Ionocyte	Xt_Ionocyte	FALSE
Xt_myh8-like;Dr_LOC100537594	Xt_myh8-like;Dr_myhz2	0	0.757705	0.757705	Eukaryota	Dr_Skeletal muscle	Xt_Skeletal muscle	FALSE
Xt_myh8-like;Dr_zgc:66156	Xt_myh8-like;Dr_myhz2	0	0.757705	0.757705	Eukaryota	Dr_Skeletal muscle	Xt_Skeletal muscle	TRUE
Xt_myh8-like;Dr_wu:fd14a01	Xt_myh8-like;Dr_myhz2	0	0.757705	0.757705	Eukaryota	Dr_Skeletal muscle	Xt_Skeletal muscle	FALSE
Xt_myh8-like;Dr_myhb	Xt_myh8-like;Dr_myhz2	0	0.757705	0.757705	Eukaryota	Dr_Skeletal muscle	Xt_Skeletal muscle	FALSE
Xt_tll1-like.2;Dr_tll1	Xt_tll1-like.2;Dr_he1b	0	0.7572	0.7572	Eukaryota	Dr_Hatching gland	Xt_Hatching gland	FALSE
Dr_col9a1b;Xt_LOC101731071	Dr_col9a1b;Xt_col5a3-like	0	0.756808	0.756808	Eukaryota	Dr_Notochord;Dr_Notoplate	Xt_Notochord;Xt_Notoplate	TRUE
Dr_col9a1b;Xt_Xetrov90014310m	Dr_col9a1b;Xt_col5a3-like	0	0.756808	0.756808	Eukaryota	Dr_Notochord;Dr_Notoplate	Xt_Notochord;Xt_Notoplate	FALSE
Xt_ldb3-like.2;Dr_ldb3a	Xt_ldb3-like.2;Dr_synpo2lb	0	0.755786	0.755786	Eukaryota	Dr_Skeletal muscle	Xt_Skeletal muscle	FALSE
Dr_actn3b;Xt_actn2	Dr_actn3b;Xt_ehbp1l1-like	0	0.755476	0.755476	Eukaryota	Dr_Skeletal muscle	Xt_Skeletal muscle	FALSE
Xt_ehbp1l1-like;Dr_ehbp1l1b	Xt_ehbp1l1-like;Dr_actn3b	0	0.755476	0.755476	Eukaryota	Dr_Skeletal muscle	Xt_Skeletal muscle	FALSE
Xt_tekt2;Dr_tekt2	Xt_tekt2;Dr_tekt4	0	0.752784	0.752784	Eukaryota			FALSE
Dr_pdlim5b;Xt_pdlim5	Dr_pdlim5b;Xt_ldb3-like.2	0	0.75051	0.75051	Eukaryota			FALSE
Xt_ldb3-like.2;Dr_ldb3a	Xt_ldb3-like.2;Dr_pdlim5b	0	0.75051	0.75051	Eukaryota			FALSE
Xt_tll1-like.2;Dr_tll1	Xt_tll1-like.2;Dr_he1a	0	0.749793	0.749793	Eukaryota	Dr_Hatching gland	Xt_Hatching gland	FALSE
Xt_tnni2;Dr_tnni2a.1	Xt_tnni2;Dr_tnni1c	0	0.74503	0.74503	Eukaryota	Dr_Skeletal muscle	Xt_Skeletal muscle	FALSE
Dr_mfap4;Xt_LOC101731491	Dr_mfap4;Xt_MGC107908	0	0.742758	0.742758	Eukaryota			FALSE
Dr_mfap4;Xt_LOC100488644	Dr_mfap4;Xt_MGC107908	0	0.742758	0.742758	Eukaryota			FALSE
Dr_mfap4;Xt_LOC100488329	Dr_mfap4;Xt_MGC107908	0	0.742758	0.742758	Eukaryota			FALSE
Dr_hbae1;Xt_hba-l3	Dr_hbae1;Xt_hbd	0.072172	0.813204	0.741032	Eukaryota	Dr_Blood	Xt_Blood	TRUE
Xt_tnnt3;Dr_tnnt3b	Xt_tnnt3;Dr_tnnt1	0.0377091	0.77762	0.73991	Eukaryota	Dr_Skeletal muscle	Xt_Skeletal muscle	FALSE
Dr_hmx4;Xt_soho1	Dr_hmx4;Xt_hmx1	0	0.737276	0.737276	Eukaryota	Dr_Eye primordium;Dr_Lens;Dr_Optic	Xt_Lens;Xt_Optic	TRUE
Xt_hbz;Dr_si:ch211-5k11.6	Xt_hbz;Dr_zgc:163057	0	0.731305	0.731305	Eukaryota	Dr_Blood	Xt_Blood	TRUE
Dr_hbae1;Xt_hba-l4	Dr_hbae1;Xt_hbd	0.0831047	0.813204	0.7301	Eukaryota	Dr_Blood	Xt_Blood	TRUE
Xt_dnah1;Dr_LOC103911853	Xt_dnah1;Dr_dnah2	0	0.725814	0.725814	Eukaryota			TRUE
Xt_dnah1;Dr_dnah1	Xt_dnah1;Dr_dnah2	0	0.725814	0.725814	Eukaryota			FALSE
Dr_dnah2;Xt_Xetrov90027922m	Dr_dnah2;Xt_dnah1	0	0.725814	0.725814	Eukaryota			FALSE
Xt_dnah1;Dr_LOC103911854	Xt_dnah1;Dr_dnah2	0	0.725814	0.725814	Eukaryota			TRUE
Dr_si:ch211-5k11.2;Xt_hba-l4	Dr_si:ch211-5k11.2;Xt_hbd	0.0939991	0.812802	0.718803	Eukaryota	Dr_Blood	Xt_Blood	TRUE
Xt_ehbp1l1-like;Dr_ehbp1l1b	Xt_ehbp1l1-like;Dr_actn3a	0	0.716793	0.716793	Eukaryota	Dr_Skeletal muscle	Xt_Skeletal muscle	FALSE
Dr_actn3a;Xt_actn2	Dr_actn3a;Xt_ehbp1l1-like	0	0.716793	0.716793	Eukaryota	Dr_Skeletal muscle	Xt_Skeletal muscle	FALSE
Xt_sox8;Dr_sox8a	Xt_sox8;Dr_sox10	0	0.715032	0.715032	Eukaryota	Dr_Neural crest	Xt_Neural crest	FALSE
Xt_sox8;Dr_sox8b	Xt_sox8;Dr_sox10	0	0.715032	0.715032	Eukaryota	Dr_Neural crest	Xt_Neural crest	FALSE
Xt_Xetrov90000734m;Dr_pdlim3a	Xt_Xetrov90000734m;Dr_synpo2lb	0	0.714786	0.714786	Eukaryota	Dr_Skeletal muscle	Xt_Skeletal muscle	FALSE
Xt_Xetrov90000734m;Dr_pdlim3b	Xt_Xetrov90000734m;Dr_synpo2lb	0	0.714786	0.714786	Eukaryota	Dr_Skeletal muscle	Xt_Skeletal muscle	FALSE
Dr_LOC100334599;Xt_hba-l4	Dr_LOC100334599;Xt_hbd	0.0934624	0.807997	0.714535	Eukaryota	Dr_Blood	Xt_Blood	TRUE
Xt_LOC101734297-like;Dr_tll1	Xt_LOC101734297-like;Dr_he1b	0	0.711485	0.711485	Eukaryota	Dr_Hatching gland	Xt_Hatching gland	FALSE
Xt_smyd1;Dr_smyd1a	Xt_smyd1;Dr_smyd2a	0	0.705759	0.705759	Eukaryota	Dr_Skeletal muscle	Xt_Skeletal muscle	TRUE
Xt_LOC101734297-like;Dr_tll1	Xt_LOC101734297-like;Dr_he1a	0	0.704944	0.704944	Eukaryota	Dr_Hatching gland	Xt_Hatching gland	FALSE
Dr_si:ch211-5k11.2;Xt_hba-l3	Dr_si:ch211-5k11.2;Xt_hbd	0.112317	0.812802	0.700486	Eukaryota	Dr_Blood	Xt_Blood	TRUE
Xt_hba-l2;Dr_si:ch211-5k11.6	Xt_hba-l2;Dr_hbbe3	0	0.699084	0.699084	Eukaryota	Dr_Blood	Xt_Blood	TRUE
Dr_LOC100334599;Xt_hba-l3	Dr_LOC100334599;Xt_hbd	0.115467	0.807997	0.69253	Eukaryota	Dr_Blood	Xt_Blood	TRUE
Xt_hba3;Dr_hbaa1	Xt_hba3;Dr_hbbe3	0.263071	0.954636	0.691565	Eukaryota	Dr_Blood	Xt_Blood	FALSE
Dr_LOC100006216;Xt_LOC100495499	Dr_LOC100006216;Xt_sp5l	0	0.691103	0.691103	Eukaryota	Dr_Dorsal organizer;Dr_Endoderm;Dr_Intermediate mesoderm;Dr_Involuting marginal zone;Dr_Notochord;Dr_Presomitic mesoderm	Xt_Endoderm;Xt_Involuting marginal zone;Xt_Notochord;Xt_Presomitic mesoderm;Xt_Spemann organizer;Xt_Tailbud	FALSE
Dr_LOC100006216;Xt_LOC100496561	Dr_LOC100006216;Xt_sp5l	0	0.691103	0.691103	Eukaryota	Dr_Dorsal organizer;Dr_Endoderm;Dr_Intermediate mesoderm;Dr_Involuting marginal zone;Dr_Notochord;Dr_Presomitic mesoderm	Xt_Endoderm;Xt_Involuting marginal zone;Xt_Notochord;Xt_Presomitic mesoderm;Xt_Spemann organizer;Xt_Tailbud	TRUE
Dr_LOC100006216;Xt_znf329	Dr_LOC100006216;Xt_sp5l	0	0.691103	0.691103	Eukaryota	Dr_Dorsal organizer;Dr_Endoderm;Dr_Intermediate mesoderm;Dr_Involuting marginal zone;Dr_Notochord;Dr_Presomitic mesoderm	Xt_Endoderm;Xt_Involuting marginal zone;Xt_Notochord;Xt_Presomitic mesoderm;Xt_Spemann organizer;Xt_Tailbud	FALSE
Dr_LOC100006216;Xt_Xetrov90015419m	Dr_LOC100006216;Xt_sp5l	0	0.691103	0.691103	Eukaryota	Dr_Dorsal organizer;Dr_Endoderm;Dr_Intermediate mesoderm;Dr_Involuting marginal zone;Dr_Notochord;Dr_Presomitic mesoderm	Xt_Endoderm;Xt_Involuting marginal zone;Xt_Notochord;Xt_Presomitic mesoderm;Xt_Spemann organizer;Xt_Tailbud	FALSE
Dr_LOC100006216;Xt_Xetrov90008367m	Dr_LOC100006216;Xt_sp5l	0	0.691103	0.691103	Eukaryota	Dr_Dorsal organizer;Dr_Endoderm;Dr_Intermediate mesoderm;Dr_Involuting marginal zone;Dr_Notochord;Dr_Presomitic mesoderm	Xt_Endoderm;Xt_Involuting marginal zone;Xt_Notochord;Xt_Presomitic mesoderm;Xt_Spemann organizer;Xt_Tailbud	FALSE
Dr_LOC100006216;Xt_LOC100493966	Dr_LOC100006216;Xt_sp5l	0	0.691103	0.691103	Eukaryota	Dr_Dorsal organizer;Dr_Endoderm;Dr_Intermediate mesoderm;Dr_Involuting marginal zone;Dr_Notochord;Dr_Presomitic mesoderm	Xt_Endoderm;Xt_Involuting marginal zone;Xt_Notochord;Xt_Presomitic mesoderm;Xt_Spemann organizer;Xt_Tailbud	FALSE
Dr_LOC100006216;Xt_LOC100497179-like	Dr_LOC100006216;Xt_sp5l	0	0.691103	0.691103	Eukaryota	Dr_Dorsal organizer;Dr_Endoderm;Dr_Intermediate mesoderm;Dr_Involuting marginal zone;Dr_Notochord;Dr_Presomitic mesoderm	Xt_Endoderm;Xt_Involuting marginal zone;Xt_Notochord;Xt_Presomitic mesoderm;Xt_Spemann organizer;Xt_Tailbud	FALSE
Dr_LOC100006216;Xt_LOC100496403-like	Dr_LOC100006216;Xt_sp5l	0.000339647	0.691103	0.690764	Eukaryota	Dr_Dorsal organizer;Dr_Endoderm;Dr_Intermediate mesoderm;Dr_Involuting marginal zone;Dr_Notochord;Dr_Presomitic mesoderm	Xt_Endoderm;Xt_Involuting marginal zone;Xt_Notochord;Xt_Presomitic mesoderm;Xt_Spemann organizer;Xt_Tailbud	TRUE
Dr_LOC100006216;Xt_Xetrov90001667m	Dr_LOC100006216;Xt_sp5l	0.00144481	0.691103	0.689659	Eukaryota	Dr_Dorsal organizer;Dr_Endoderm;Dr_Intermediate mesoderm;Dr_Involuting marginal zone;Dr_Notochord;Dr_Presomitic mesoderm	Xt_Endoderm;Xt_Involuting marginal zone;Xt_Notochord;Xt_Presomitic mesoderm;Xt_Spemann organizer;Xt_Tailbud	FALSE
Dr_LOC100006216;Xt_znf250	Dr_LOC100006216;Xt_sp5l	0.00174912	0.691103	0.689354	Eukaryota	Dr_Dorsal organizer;Dr_Endoderm;Dr_Intermediate mesoderm;Dr_Involuting marginal zone;Dr_Notochord;Dr_Presomitic mesoderm	Xt_Endoderm;Xt_Involuting marginal zone;Xt_Notochord;Xt_Presomitic mesoderm;Xt_Spemann organizer;Xt_Tailbud	FALSE
Dr_hbae1;Xt_hba2	Dr_hbae1;Xt_hbd	0.125083	0.813204	0.688121	Eukaryota	Dr_Blood	Xt_Blood	TRUE
Dr_hbae3;Xt_hba-l4	Dr_hbae3;Xt_hbd	0.0893917	0.777392	0.688001	Eukaryota	Dr_Blood	Xt_Blood	TRUE
Dr_LOC570015;Xt_LOC100497179-like	Dr_LOC570015;Xt_ctcf	0	0.687706	0.687706	Eukaryota	Dr_Dorsal organizer;Dr_Endoderm;Dr_Involuting marginal zone;Dr_Neuroectoderm;Dr_Non-neural ectoderm;Dr_Notochord	Xt_Endoderm;Xt_Involuting marginal zone;Xt_Neuroectoderm;Xt_Non-neural ectoderm;Xt_Spemann organizer	FALSE
Dr_LOC570015;Xt_Xetrov90029323m	Dr_LOC570015;Xt_ctcf	0	0.687706	0.687706	Eukaryota	Dr_Dorsal organizer;Dr_Endoderm;Dr_Involuting marginal zone;Dr_Neuroectoderm;Dr_Non-neural ectoderm;Dr_Notochord	Xt_Endoderm;Xt_Involuting marginal zone;Xt_Neuroectoderm;Xt_Non-neural ectoderm;Xt_Spemann organizer	FALSE
Dr_LOC570015;Xt_Xetrov90015419m	Dr_LOC570015;Xt_ctcf	0	0.687706	0.687706	Eukaryota	Dr_Dorsal organizer;Dr_Endoderm;Dr_Involuting marginal zone;Dr_Neuroectoderm;Dr_Non-neural ectoderm;Dr_Notochord	Xt_Endoderm;Xt_Involuting marginal zone;Xt_Neuroectoderm;Xt_Non-neural ectoderm;Xt_Spemann organizer	FALSE
Dr_LOC570015;Xt_LOC100495499	Dr_LOC570015;Xt_ctcf	0	0.687706	0.687706	Eukaryota	Dr_Dorsal organizer;Dr_Endoderm;Dr_Involuting marginal zone;Dr_Neuroectoderm;Dr_Non-neural ectoderm;Dr_Notochord	Xt_Endoderm;Xt_Involuting marginal zone;Xt_Neuroectoderm;Xt_Non-neural ectoderm;Xt_Spemann organizer	FALSE
Dr_LOC570015;Xt_Xetrov90001667m	Dr_LOC570015;Xt_ctcf	0	0.687706	0.687706	Eukaryota	Dr_Dorsal organizer;Dr_Endoderm;Dr_Involuting marginal zone;Dr_Neuroectoderm;Dr_Non-neural ectoderm;Dr_Notochord	Xt_Endoderm;Xt_Involuting marginal zone;Xt_Neuroectoderm;Xt_Non-neural ectoderm;Xt_Spemann organizer	FALSE
Dr_LOC570015;Xt_LOC101735121-like	Dr_LOC570015;Xt_ctcf	0	0.687706	0.687706	Eukaryota	Dr_Dorsal organizer;Dr_Endoderm;Dr_Involuting marginal zone;Dr_Neuroectoderm;Dr_Non-neural ectoderm;Dr_Notochord	Xt_Endoderm;Xt_Involuting marginal zone;Xt_Neuroectoderm;Xt_Non-neural ectoderm;Xt_Spemann organizer	FALSE
Dr_LOC570015;Xt_znf383	Dr_LOC570015;Xt_ctcf	0	0.687706	0.687706	Eukaryota	Dr_Dorsal organizer;Dr_Endoderm;Dr_Involuting marginal zone;Dr_Neuroectoderm;Dr_Non-neural ectoderm;Dr_Notochord	Xt_Endoderm;Xt_Involuting marginal zone;Xt_Neuroectoderm;Xt_Non-neural ectoderm;Xt_Spemann organizer	FALSE
Dr_LOC570015;Xt_znf329	Dr_LOC570015;Xt_ctcf	0	0.687706	0.687706	Eukaryota	Dr_Dorsal organizer;Dr_Endoderm;Dr_Involuting marginal zone;Dr_Neuroectoderm;Dr_Non-neural ectoderm;Dr_Notochord	Xt_Endoderm;Xt_Involuting marginal zone;Xt_Neuroectoderm;Xt_Non-neural ectoderm;Xt_Spemann organizer	FALSE
Dr_LOC570015;Xt_LOC100496561	Dr_LOC570015;Xt_ctcf	0	0.687706	0.687706	Eukaryota	Dr_Dorsal organizer;Dr_Endoderm;Dr_Involuting marginal zone;Dr_Neuroectoderm;Dr_Non-neural ectoderm;Dr_Notochord	Xt_Endoderm;Xt_Involuting marginal zone;Xt_Neuroectoderm;Xt_Non-neural ectoderm;Xt_Spemann organizer	TRUE
Dr_LOC570015;Xt_znf250	Dr_LOC570015;Xt_ctcf	0	0.687706	0.687706	Eukaryota	Dr_Dorsal organizer;Dr_Endoderm;Dr_Involuting marginal zone;Dr_Neuroectoderm;Dr_Non-neural ectoderm;Dr_Notochord	Xt_Endoderm;Xt_Involuting marginal zone;Xt_Neuroectoderm;Xt_Non-neural ectoderm;Xt_Spemann organizer	FALSE
Dr_LOC570015;Xt_LOC100496403-like	Dr_LOC570015;Xt_ctcf	0	0.687706	0.687706	Eukaryota	Dr_Dorsal organizer;Dr_Endoderm;Dr_Involuting marginal zone;Dr_Neuroectoderm;Dr_Non-neural ectoderm;Dr_Notochord	Xt_Endoderm;Xt_Involuting marginal zone;Xt_Neuroectoderm;Xt_Non-neural ectoderm;Xt_Spemann organizer	TRUE
Dr_LOC570015;Xt_Xetrov90008367m	Dr_LOC570015;Xt_ctcf	0	0.687706	0.687706	Eukaryota	Dr_Dorsal organizer;Dr_Endoderm;Dr_Involuting marginal zone;Dr_Neuroectoderm;Dr_Non-neural ectoderm;Dr_Notochord	Xt_Endoderm;Xt_Involuting marginal zone;Xt_Neuroectoderm;Xt_Non-neural ectoderm;Xt_Spemann organizer	FALSE
Dr_LOC570015;Xt_LOC100493966	Dr_LOC570015;Xt_ctcf	0	0.687706	0.687706	Eukaryota	Dr_Dorsal organizer;Dr_Endoderm;Dr_Involuting marginal zone;Dr_Neuroectoderm;Dr_Non-neural ectoderm;Dr_Notochord	Xt_Endoderm;Xt_Involuting marginal zone;Xt_Neuroectoderm;Xt_Non-neural ectoderm;Xt_Spemann organizer	FALSE
Dr_LOC570015;Xt_Xetrov90015421m	Dr_LOC570015;Xt_ctcf	0	0.687706	0.687706	Eukaryota	Dr_Dorsal organizer;Dr_Endoderm;Dr_Involuting marginal zone;Dr_Neuroectoderm;Dr_Non-neural ectoderm;Dr_Notochord	Xt_Endoderm;Xt_Involuting marginal zone;Xt_Neuroectoderm;Xt_Non-neural ectoderm;Xt_Spemann organizer	FALSE
Dr_LOC570015;Xt_LOC101734394	Dr_LOC570015;Xt_ctcf	0.00262063	0.687706	0.685086	Eukaryota	Dr_Dorsal organizer;Dr_Endoderm;Dr_Involuting marginal zone;Dr_Neuroectoderm;Dr_Non-neural ectoderm;Dr_Notochord	Xt_Endoderm;Xt_Involuting marginal zone;Xt_Neuroectoderm;Xt_Non-neural ectoderm;Xt_Spemann organizer	FALSE
Dr_col9a1b;Xt_LOC101731071	Dr_col9a1b;Xt_Xetrov90016548m	0	0.684078	0.684078	Eukaryota	Dr_Notochord	Xt_Notochord	TRUE
Dr_col9a1b;Xt_Xetrov90014310m	Dr_col9a1b;Xt_Xetrov90016548m	0	0.684078	0.684078	Eukaryota	Dr_Notochord	Xt_Notochord	FALSE
Xt_hba-l2;Dr_si:ch211-5k11.6	Xt_hba-l2;Dr_MGC173646	0	0.684031	0.684031	Eukaryota	Dr_Blood	Xt_Blood	TRUE
Dr_LOC100006216;Xt_Xetrov90029323m	Dr_LOC100006216;Xt_sp5l	0.00717816	0.691103	0.683925	Eukaryota	Dr_Dorsal organizer;Dr_Endoderm;Dr_Intermediate mesoderm;Dr_Involuting marginal zone;Dr_Notochord;Dr_Presomitic mesoderm	Xt_Endoderm;Xt_Involuting marginal zone;Xt_Notochord;Xt_Presomitic mesoderm;Xt_Spemann organizer;Xt_Tailbud	FALSE
Dr_LOC100006216;Xt_LOC101734394	Dr_LOC100006216;Xt_sp5l	0.00719094	0.691103	0.683912	Eukaryota	Dr_Dorsal organizer;Dr_Endoderm;Dr_Intermediate mesoderm;Dr_Involuting marginal zone;Dr_Notochord;Dr_Presomitic mesoderm	Xt_Endoderm;Xt_Involuting marginal zone;Xt_Notochord;Xt_Presomitic mesoderm;Xt_Spemann organizer;Xt_Tailbud	FALSE
Dr_LOC100006216;Xt_LOC101735121-like	Dr_LOC100006216;Xt_sp5l	0.00899431	0.691103	0.682109	Eukaryota	Dr_Dorsal organizer;Dr_Endoderm;Dr_Intermediate mesoderm;Dr_Involuting marginal zone;Dr_Notochord;Dr_Presomitic mesoderm	Xt_Endoderm;Xt_Involuting marginal zone;Xt_Notochord;Xt_Presomitic mesoderm;Xt_Spemann organizer;Xt_Tailbud	FALSE
Xt_atp1b2;Dr_atp1b2a	Xt_atp1b2;Dr_atp1b1b	0	0.67595	0.67595	Eukaryota	Dr_Ionocyte;Dr_Rare epidermal subtypes	Xt_Goblet cell;Xt_Hatching gland;Xt_Ionocyte	FALSE
Xt_atp1b2;Dr_atp1b2b	Xt_atp1b2;Dr_atp1b1b	0	0.67595	0.67595	Eukaryota	Dr_Ionocyte;Dr_Rare epidermal subtypes	Xt_Goblet cell;Xt_Hatching gland;Xt_Ionocyte	FALSE
Dr_atp1b1b;Xt_atp1b1	Dr_atp1b1b;Xt_atp1b2	0.00188355	0.67595	0.674066	Eukaryota	Dr_Ionocyte;Dr_Rare epidermal subtypes	Xt_Goblet cell;Xt_Hatching gland;Xt_Ionocyte	FALSE
Xt_hba-l2;Dr_si:ch211-5k11.6	Xt_hba-l2;Dr_hbbe1.1	0	0.673547	0.673547	Eukaryota	Dr_Blood	Xt_Blood	TRUE
Dr_LOC100006216;Xt_znf383	Dr_LOC100006216;Xt_sp5l	0.0178327	0.691103	0.673271	Eukaryota	Dr_Dorsal organizer;Dr_Endoderm;Dr_Intermediate mesoderm;Dr_Involuting marginal zone;Dr_Notochord;Dr_Presomitic mesoderm	Xt_Endoderm;Xt_Involuting marginal zone;Xt_Notochord;Xt_Presomitic mesoderm;Xt_Spemann organizer;Xt_Tailbud	FALSE
Dr_si:zfos-2330d3.3;Xt_LOC100488644	Dr_si:zfos-2330d3.3;Xt_MGC107908	0	0.669024	0.669024	Eukaryota			FALSE
Dr_si:zfos-2330d3.3;Xt_LOC100488329	Dr_si:zfos-2330d3.3;Xt_MGC107908	0	0.669024	0.669024	Eukaryota			FALSE
Dr_si:zfos-2330d3.3;Xt_LOC101731491	Dr_si:zfos-2330d3.3;Xt_MGC107908	0	0.669024	0.669024	Eukaryota			FALSE
Dr_dmrt3a;Xt_dmrt3	Dr_dmrt3a;Xt_dmrta1	0	0.66671	0.66671	Eukaryota			FALSE
Xt_myh2;Dr_LOC100537594	Xt_myh2;Dr_myhz2	0	0.665437	0.665437	Eukaryota	Dr_Skeletal muscle	Xt_Skeletal muscle	FALSE
Xt_myh2;Dr_wu:fd14a01	Xt_myh2;Dr_myhz2	0	0.665437	0.665437	Eukaryota	Dr_Skeletal muscle	Xt_Skeletal muscle	FALSE
Xt_myh2;Dr_zgc:66156	Xt_myh2;Dr_myhz2	0	0.665437	0.665437	Eukaryota	Dr_Skeletal muscle	Xt_Skeletal muscle	TRUE
Xt_myh2;Dr_myhb	Xt_myh2;Dr_myhz2	0	0.665437	0.665437	Eukaryota	Dr_Skeletal muscle	Xt_Skeletal muscle	FALSE
Dr_hbae3;Xt_hba-l3	Dr_hbae3;Xt_hbd	0.112611	0.777392	0.664781	Eukaryota	Dr_Blood	Xt_Blood	TRUE
Dr_dnah2;Xt_Xetrov90027922m	Dr_dnah2;Xt_dnah7	0	0.659825	0.659825	Eukaryota			FALSE
Dr_im:6909388;Xt_LOC100489385	Dr_im:6909388;Xt_morn5	0	0.657258	0.657258	Eukaryota			TRUE
Xt_hba-l2;Dr_si:ch211-5k11.6	Xt_hba-l2;Dr_hbbe2	0	0.655404	0.655404	Eukaryota	Dr_Blood	Xt_Blood	TRUE
Dr_zgc:171687;Xt_LOC100488644	Dr_zgc:171687;Xt_MGC107908	0	0.651663	0.651663	Eukaryota			FALSE
Dr_zgc:171687;Xt_LOC101731491	Dr_zgc:171687;Xt_MGC107908	0	0.651663	0.651663	Eukaryota			FALSE
Dr_zgc:171687;Xt_LOC100488329	Dr_zgc:171687;Xt_MGC107908	0	0.651663	0.651663	Eukaryota			FALSE
Xt_LOC100486063;Dr_col6a6	Xt_LOC100486063;Dr_col14a1a	0	0.651051	0.651051	Eukaryota	Dr_Epidermal progenitor;Dr_Lens;Dr_Placodal area	Xt_Epidermal progenitor;Xt_Lens;Xt_Placodal area	FALSE
Dr_col14a1a;Xt_col12a1	Dr_col14a1a;Xt_LOC100486063	0	0.651051	0.651051	Eukaryota	Dr_Epidermal progenitor;Dr_Lens;Dr_Placodal area	Xt_Epidermal progenitor;Xt_Lens;Xt_Placodal area	FALSE
Xt_LOC100486063;Dr_LOC100535278	Xt_LOC100486063;Dr_col14a1a	0	0.651051	0.651051	Eukaryota	Dr_Epidermal progenitor;Dr_Lens;Dr_Placodal area	Xt_Epidermal progenitor;Xt_Lens;Xt_Placodal area	FALSE
Xt_hba1;Dr_hbaa1	Xt_hba1;Dr_hbbe3	0	0.649916	0.649916	Eukaryota	Dr_Blood	Xt_Blood	FALSE
Xt_hba1;Dr_si:ch211-5k11.6	Xt_hba1;Dr_hbbe3	0	0.649916	0.649916	Eukaryota	Dr_Blood	Xt_Blood	TRUE
Dr_chrna1;Xt_chrna1	Dr_chrna1;Xt_chrng	0.252387	0.899923	0.647536	Eukaryota	Dr_Skeletal muscle	Xt_Skeletal muscle	FALSE
Xt_col6a1;Dr_col6a1	Xt_col6a1;Dr_col7a1	0	0.647209	0.647209	Eukaryota	Dr_Epidermal progenitor;Dr_Placodal area	Xt_Epidermal progenitor	FALSE
Dr_col7a1;Xt_Xetrov90012753m	Dr_col7a1;Xt_col6a1	0	0.647209	0.647209	Eukaryota	Dr_Epidermal progenitor;Dr_Placodal area	Xt_Epidermal progenitor	TRUE
Dr_col7a1;Xt_Xetrov90012754m	Dr_col7a1;Xt_col6a1	0	0.647209	0.647209	Eukaryota	Dr_Epidermal progenitor;Dr_Placodal area	Xt_Epidermal progenitor	FALSE
Dr_dlx5a;Xt_dlx5	Dr_dlx5a;Xt_dlx2	0	0.641791	0.641791	Eukaryota			FALSE
Dr_chrna1;Xt_chrna1	Dr_chrna1;Xt_chrnd	0.252387	0.891403	0.639017	Eukaryota	Dr_Skeletal muscle	Xt_Skeletal muscle	FALSE
Dr_im:6909388;Xt_LOC100489385	Dr_im:6909388;Xt_rsph10b-like	0	0.636739	0.636739	Eukaryota			TRUE
Xt_chrng;Dr_chrne	Xt_chrng;Dr_chrna1	0.263603	0.899923	0.63632	Eukaryota	Dr_Skeletal muscle	Xt_Skeletal muscle	FALSE
Dr_wu:fj11g02;Xt_LOC100488644	Dr_wu:fj11g02;Xt_MGC107908	0	0.636169	0.636169	Eukaryota			FALSE
Dr_wu:fj11g02;Xt_LOC101731491	Dr_wu:fj11g02;Xt_MGC107908	0	0.636169	0.636169	Eukaryota			FALSE
Dr_wu:fj11g02;Xt_LOC100488329	Dr_wu:fj11g02;Xt_MGC107908	0	0.636169	0.636169	Eukaryota			FALSE
Xt_hba3;Dr_hbaa1	Xt_hba3;Dr_zgc:163057	0.263071	0.898187	0.635116	Eukaryota	Dr_Blood	Xt_Blood	FALSE
Dr_LOC100334652;Xt_Xetrov90015421m	Dr_LOC100334652;Xt_sp5l	0	0.634089	0.634089	Eukaryota	Dr_Dorsal organizer;Dr_Endoderm;Dr_Intermediate mesoderm;Dr_Involuting marginal zone;Dr_Notochord;Dr_Presomitic mesoderm	Xt_Endoderm;Xt_Involuting marginal zone;Xt_Notochord;Xt_Presomitic mesoderm;Xt_Spemann organizer;Xt_Tailbud	TRUE
Dr_LOC100334652;Xt_znf329	Dr_LOC100334652;Xt_sp5l	0	0.634089	0.634089	Eukaryota	Dr_Dorsal organizer;Dr_Endoderm;Dr_Intermediate mesoderm;Dr_Involuting marginal zone;Dr_Notochord;Dr_Presomitic mesoderm	Xt_Endoderm;Xt_Involuting marginal zone;Xt_Notochord;Xt_Presomitic mesoderm;Xt_Spemann organizer;Xt_Tailbud	FALSE
Dr_LOC100334652;Xt_LOC100496561	Dr_LOC100334652;Xt_sp5l	0	0.634089	0.634089	Eukaryota	Dr_Dorsal organizer;Dr_Endoderm;Dr_Intermediate mesoderm;Dr_Involuting marginal zone;Dr_Notochord;Dr_Presomitic mesoderm	Xt_Endoderm;Xt_Involuting marginal zone;Xt_Notochord;Xt_Presomitic mesoderm;Xt_Spemann organizer;Xt_Tailbud	TRUE
Dr_LOC100334652;Xt_LOC101735121-like	Dr_LOC100334652;Xt_sp5l	0	0.634089	0.634089	Eukaryota	Dr_Dorsal organizer;Dr_Endoderm;Dr_Intermediate mesoderm;Dr_Involuting marginal zone;Dr_Notochord;Dr_Presomitic mesoderm	Xt_Endoderm;Xt_Involuting marginal zone;Xt_Notochord;Xt_Presomitic mesoderm;Xt_Spemann organizer;Xt_Tailbud	FALSE
Dr_LOC100334652;Xt_znf383	Dr_LOC100334652;Xt_sp5l	0	0.634089	0.634089	Eukaryota	Dr_Dorsal organizer;Dr_Endoderm;Dr_Intermediate mesoderm;Dr_Involuting marginal zone;Dr_Notochord;Dr_Presomitic mesoderm	Xt_Endoderm;Xt_Involuting marginal zone;Xt_Notochord;Xt_Presomitic mesoderm;Xt_Spemann organizer;Xt_Tailbud	FALSE
Dr_LOC100334652;Xt_Xetrov90015419m	Dr_LOC100334652;Xt_sp5l	0	0.634089	0.634089	Eukaryota	Dr_Dorsal organizer;Dr_Endoderm;Dr_Intermediate mesoderm;Dr_Involuting marginal zone;Dr_Notochord;Dr_Presomitic mesoderm	Xt_Endoderm;Xt_Involuting marginal zone;Xt_Notochord;Xt_Presomitic mesoderm;Xt_Spemann organizer;Xt_Tailbud	FALSE
Dr_LOC100334652;Xt_LOC100497179-like	Dr_LOC100334652;Xt_sp5l	0	0.634089	0.634089	Eukaryota	Dr_Dorsal organizer;Dr_Endoderm;Dr_Intermediate mesoderm;Dr_Involuting marginal zone;Dr_Notochord;Dr_Presomitic mesoderm	Xt_Endoderm;Xt_Involuting marginal zone;Xt_Notochord;Xt_Presomitic mesoderm;Xt_Spemann organizer;Xt_Tailbud	FALSE
Dr_LOC100334652;Xt_znf250	Dr_LOC100334652;Xt_sp5l	0	0.634089	0.634089	Eukaryota	Dr_Dorsal organizer;Dr_Endoderm;Dr_Intermediate mesoderm;Dr_Involuting marginal zone;Dr_Notochord;Dr_Presomitic mesoderm	Xt_Endoderm;Xt_Involuting marginal zone;Xt_Notochord;Xt_Presomitic mesoderm;Xt_Spemann organizer;Xt_Tailbud	FALSE
Dr_LOC100334652;Xt_Xetrov90029323m	Dr_LOC100334652;Xt_sp5l	0	0.634089	0.634089	Eukaryota	Dr_Dorsal organizer;Dr_Endoderm;Dr_Intermediate mesoderm;Dr_Involuting marginal zone;Dr_Notochord;Dr_Presomitic mesoderm	Xt_Endoderm;Xt_Involuting marginal zone;Xt_Notochord;Xt_Presomitic mesoderm;Xt_Spemann organizer;Xt_Tailbud	FALSE
Dr_LOC100334652;Xt_LOC100496403-like	Dr_LOC100334652;Xt_sp5l	0	0.634089	0.634089	Eukaryota	Dr_Dorsal organizer;Dr_Endoderm;Dr_Intermediate mesoderm;Dr_Involuting marginal zone;Dr_Notochord;Dr_Presomitic mesoderm	Xt_Endoderm;Xt_Involuting marginal zone;Xt_Notochord;Xt_Presomitic mesoderm;Xt_Spemann organizer;Xt_Tailbud	TRUE
Dr_LOC100334652;Xt_Xetrov90001667m	Dr_LOC100334652;Xt_sp5l	0	0.634089	0.634089	Eukaryota	Dr_Dorsal organizer;Dr_Endoderm;Dr_Intermediate mesoderm;Dr_Involuting marginal zone;Dr_Notochord;Dr_Presomitic mesoderm	Xt_Endoderm;Xt_Involuting marginal zone;Xt_Notochord;Xt_Presomitic mesoderm;Xt_Spemann organizer;Xt_Tailbud	FALSE
Dr_LOC100334652;Xt_LOC100493966	Dr_LOC100334652;Xt_sp5l	0	0.634089	0.634089	Eukaryota	Dr_Dorsal organizer;Dr_Endoderm;Dr_Intermediate mesoderm;Dr_Involuting marginal zone;Dr_Notochord;Dr_Presomitic mesoderm	Xt_Endoderm;Xt_Involuting marginal zone;Xt_Notochord;Xt_Presomitic mesoderm;Xt_Spemann organizer;Xt_Tailbud	FALSE
Dr_LOC100334652;Xt_Xetrov90008367m	Dr_LOC100334652;Xt_sp5l	0	0.634089	0.634089	Eukaryota	Dr_Dorsal organizer;Dr_Endoderm;Dr_Intermediate mesoderm;Dr_Involuting marginal zone;Dr_Notochord;Dr_Presomitic mesoderm	Xt_Endoderm;Xt_Involuting marginal zone;Xt_Notochord;Xt_Presomitic mesoderm;Xt_Spemann organizer;Xt_Tailbud	FALSE
Dr_LOC100334652;Xt_LOC100495499	Dr_LOC100334652;Xt_sp5l	0	0.634089	0.634089	Eukaryota	Dr_Dorsal organizer;Dr_Endoderm;Dr_Intermediate mesoderm;Dr_Involuting marginal zone;Dr_Notochord;Dr_Presomitic mesoderm	Xt_Endoderm;Xt_Involuting marginal zone;Xt_Notochord;Xt_Presomitic mesoderm;Xt_Spemann organizer;Xt_Tailbud	FALSE
Dr_LOC100334652;Xt_LOC101734394	Dr_LOC100334652;Xt_sp5l	0	0.634089	0.634089	Eukaryota	Dr_Dorsal organizer;Dr_Endoderm;Dr_Intermediate mesoderm;Dr_Involuting marginal zone;Dr_Notochord;Dr_Presomitic mesoderm	Xt_Endoderm;Xt_Involuting marginal zone;Xt_Notochord;Xt_Presomitic mesoderm;Xt_Spemann organizer;Xt_Tailbud	FALSE
Xt_hba1;Dr_hbaa1	Xt_hba1;Dr_hbbe1.1	0	0.633576	0.633576	Eukaryota	Dr_Blood	Xt_Blood	FALSE
Xt_hba1;Dr_si:ch211-5k11.6	Xt_hba1;Dr_hbbe1.1	0	0.633576	0.633576	Eukaryota	Dr_Blood	Xt_Blood	TRUE
Xt_synpo2l;Dr_synpo2la	Xt_synpo2l;Dr_pdlim5b	0	0.63207	0.63207	Eukaryota			FALSE
Dr_pdlim5b;Xt_pdlim5	Dr_pdlim5b;Xt_synpo2l	0	0.63207	0.63207	Eukaryota			FALSE
Dr_col9a1b;Xt_Xetrov90014310m	Dr_col9a1b;Xt_LOC100497103	0	0.630911	0.630911	Eukaryota	Dr_Notochord	Xt_Notochord	FALSE
Dr_col9a1b;Xt_LOC101731071	Dr_col9a1b;Xt_LOC100497103	0	0.630911	0.630911	Eukaryota	Dr_Notochord	Xt_Notochord	TRUE
Xt_hba1;Dr_si:ch211-5k11.6	Xt_hba1;Dr_si:ch211-5k11.12	0	0.628301	0.628301	Eukaryota	Dr_Blood	Xt_Blood	TRUE
Xt_hba1;Dr_hbaa1	Xt_hba1;Dr_si:ch211-5k11.12	0	0.628301	0.628301	Eukaryota	Dr_Blood	Xt_Blood	FALSE
Xt_myf6;Dr_myf6	Xt_myf6;Dr_myod1	0	0.62608	0.62608	Eukaryota	Dr_Presomitic mesoderm;Dr_Skeletal muscle	Xt_Skeletal muscle	TRUE
Dr_pax2a;Xt_pax5	Dr_pax2a;Xt_pax8	0	0.624296	0.624296	Eukaryota	Dr_Forebrain/midbrain;Dr_Otic placode;Dr_Placodal area	Xt_Otic placode;Xt_Placodal area;Xt_Pronephric mesenchyme	FALSE
Dr_pax2a;Xt_pax2	Dr_pax2a;Xt_pax8	0	0.624296	0.624296	Eukaryota	Dr_Forebrain/midbrain;Dr_Otic placode;Dr_Placodal area	Xt_Otic placode;Xt_Placodal area;Xt_Pronephric mesenchyme	FALSE
Xt_pax8;Dr_pax8	Xt_pax8;Dr_pax2a	0	0.624296	0.624296	Eukaryota	Dr_Forebrain/midbrain;Dr_Otic placode;Dr_Placodal area	Xt_Otic placode;Xt_Placodal area;Xt_Pronephric mesenchyme	TRUE
Xt_dnah7;Dr_dnah7	Xt_dnah7;Dr_dnah2	0.0359341	0.659825	0.623891	Eukaryota			FALSE
Dr_si:ch211-5k11.2;Xt_hba-l4	Dr_si:ch211-5k11.2;Xt_hbe1	0.0939991	0.716318	0.622319	Eukaryota	Dr_Blood	Xt_Blood	TRUE
Dr_zgc:173915;Xt_LOC100488329	Dr_zgc:173915;Xt_fgl2	0	0.622257	0.622257	Eukaryota			FALSE
Xt_fgl2;Dr_si:ch211-236c15.2	Xt_fgl2;Dr_zgc:173915	0	0.622257	0.622257	Eukaryota			FALSE
Xt_fgl2;Dr_fgl2a	Xt_fgl2;Dr_zgc:173915	0	0.622257	0.622257	Eukaryota			FALSE
Dr_zgc:173915;Xt_LOC101731491	Dr_zgc:173915;Xt_fgl2	0	0.622257	0.622257	Eukaryota			FALSE
Dr_zgc:173915;Xt_LOC100488644	Dr_zgc:173915;Xt_fgl2	0	0.622257	0.622257	Eukaryota			FALSE
Xt_dnah1;Dr_LOC103911852	Xt_dnah1;Dr_dnah2	0.104767	0.725814	0.621047	Eukaryota			FALSE
Xt_fgl2;Dr_fgl2a	Xt_fgl2;Dr_mfap4	0	0.620639	0.620639	Eukaryota			FALSE
Dr_mfap4;Xt_LOC101731491	Dr_mfap4;Xt_fgl2	0	0.620639	0.620639	Eukaryota			FALSE
Dr_mfap4;Xt_LOC100488329	Dr_mfap4;Xt_fgl2	0	0.620639	0.620639	Eukaryota			FALSE
Dr_mfap4;Xt_LOC100488644	Dr_mfap4;Xt_fgl2	0	0.620639	0.620639	Eukaryota			FALSE
Xt_fgl2;Dr_si:ch211-236c15.2	Xt_fgl2;Dr_mfap4	0	0.620639	0.620639	Eukaryota			FALSE
Dr_LOC100334599;Xt_hba-l4	Dr_LOC100334599;Xt_hbe1	0.0934624	0.713889	0.620426	Eukaryota	Dr_Blood	Xt_Blood	TRUE
Dr_hbae1;Xt_hba-l3	Dr_hbae1;Xt_hbe1	0.072172	0.692286	0.620114	Eukaryota	Dr_Blood	Xt_Blood	TRUE
Xt_dnah1;Dr_LOC103911854	Xt_dnah1;Dr_dnah5	0	0.617816	0.617816	Eukaryota			TRUE
Xt_dnah1;Dr_dnah1	Xt_dnah1;Dr_dnah5	0	0.617816	0.617816	Eukaryota			FALSE
Dr_dnah5;Xt_Xetrov90026166m	Dr_dnah5;Xt_dnah1	0	0.617816	0.617816	Eukaryota			TRUE
Xt_dnah1;Dr_LOC103911853	Xt_dnah1;Dr_dnah5	0	0.617816	0.617816	Eukaryota			TRUE
Dr_LOC557268;Xt_LOC100493966	Dr_LOC557268;Xt_sp5l	0	0.616497	0.616497	Eukaryota	Dr_Dorsal organizer;Dr_Endoderm;Dr_Intermediate mesoderm;Dr_Involuting marginal zone;Dr_Notochord;Dr_Presomitic mesoderm	Xt_Endoderm;Xt_Involuting marginal zone;Xt_Notochord;Xt_Presomitic mesoderm;Xt_Spemann organizer;Xt_Tailbud	FALSE
Dr_LOC557268;Xt_Xetrov90015421m	Dr_LOC557268;Xt_sp5l	0	0.616497	0.616497	Eukaryota	Dr_Dorsal organizer;Dr_Endoderm;Dr_Intermediate mesoderm;Dr_Involuting marginal zone;Dr_Notochord;Dr_Presomitic mesoderm	Xt_Endoderm;Xt_Involuting marginal zone;Xt_Notochord;Xt_Presomitic mesoderm;Xt_Spemann organizer;Xt_Tailbud	FALSE
Dr_LOC557268;Xt_Xetrov90015419m	Dr_LOC557268;Xt_sp5l	0	0.616497	0.616497	Eukaryota	Dr_Dorsal organizer;Dr_Endoderm;Dr_Intermediate mesoderm;Dr_Involuting marginal zone;Dr_Notochord;Dr_Presomitic mesoderm	Xt_Endoderm;Xt_Involuting marginal zone;Xt_Notochord;Xt_Presomitic mesoderm;Xt_Spemann organizer;Xt_Tailbud	FALSE
Dr_LOC557268;Xt_znf383	Dr_LOC557268;Xt_sp5l	0	0.616497	0.616497	Eukaryota	Dr_Dorsal organizer;Dr_Endoderm;Dr_Intermediate mesoderm;Dr_Involuting marginal zone;Dr_Notochord;Dr_Presomitic mesoderm	Xt_Endoderm;Xt_Involuting marginal zone;Xt_Notochord;Xt_Presomitic mesoderm;Xt_Spemann organizer;Xt_Tailbud	FALSE
Dr_LOC557268;Xt_Xetrov90008367m	Dr_LOC557268;Xt_sp5l	0	0.616497	0.616497	Eukaryota	Dr_Dorsal organizer;Dr_Endoderm;Dr_Intermediate mesoderm;Dr_Involuting marginal zone;Dr_Notochord;Dr_Presomitic mesoderm	Xt_Endoderm;Xt_Involuting marginal zone;Xt_Notochord;Xt_Presomitic mesoderm;Xt_Spemann organizer;Xt_Tailbud	FALSE
Dr_LOC557268;Xt_LOC100496561	Dr_LOC557268;Xt_sp5l	0	0.616497	0.616497	Eukaryota	Dr_Dorsal organizer;Dr_Endoderm;Dr_Intermediate mesoderm;Dr_Involuting marginal zone;Dr_Notochord;Dr_Presomitic mesoderm	Xt_Endoderm;Xt_Involuting marginal zone;Xt_Notochord;Xt_Presomitic mesoderm;Xt_Spemann organizer;Xt_Tailbud	TRUE
Dr_LOC557268;Xt_Xetrov90029323m	Dr_LOC557268;Xt_sp5l	0	0.616497	0.616497	Eukaryota	Dr_Dorsal organizer;Dr_Endoderm;Dr_Intermediate mesoderm;Dr_Involuting marginal zone;Dr_Notochord;Dr_Presomitic mesoderm	Xt_Endoderm;Xt_Involuting marginal zone;Xt_Notochord;Xt_Presomitic mesoderm;Xt_Spemann organizer;Xt_Tailbud	FALSE
Dr_LOC557268;Xt_LOC100495499	Dr_LOC557268;Xt_sp5l	0	0.616497	0.616497	Eukaryota	Dr_Dorsal organizer;Dr_Endoderm;Dr_Intermediate mesoderm;Dr_Involuting marginal zone;Dr_Notochord;Dr_Presomitic mesoderm	Xt_Endoderm;Xt_Involuting marginal zone;Xt_Notochord;Xt_Presomitic mesoderm;Xt_Spemann organizer;Xt_Tailbud	FALSE
Dr_LOC557268;Xt_LOC101734394	Dr_LOC557268;Xt_sp5l	0	0.616497	0.616497	Eukaryota	Dr_Dorsal organizer;Dr_Endoderm;Dr_Intermediate mesoderm;Dr_Involuting marginal zone;Dr_Notochord;Dr_Presomitic mesoderm	Xt_Endoderm;Xt_Involuting marginal zone;Xt_Notochord;Xt_Presomitic mesoderm;Xt_Spemann organizer;Xt_Tailbud	FALSE
Dr_LOC557268;Xt_LOC100497179-like	Dr_LOC557268;Xt_sp5l	0	0.616497	0.616497	Eukaryota	Dr_Dorsal organizer;Dr_Endoderm;Dr_Intermediate mesoderm;Dr_Involuting marginal zone;Dr_Notochord;Dr_Presomitic mesoderm	Xt_Endoderm;Xt_Involuting marginal zone;Xt_Notochord;Xt_Presomitic mesoderm;Xt_Spemann organizer;Xt_Tailbud	FALSE
Dr_LOC557268;Xt_znf329	Dr_LOC557268;Xt_sp5l	0	0.616497	0.616497	Eukaryota	Dr_Dorsal organizer;Dr_Endoderm;Dr_Intermediate mesoderm;Dr_Involuting marginal zone;Dr_Notochord;Dr_Presomitic mesoderm	Xt_Endoderm;Xt_Involuting marginal zone;Xt_Notochord;Xt_Presomitic mesoderm;Xt_Spemann organizer;Xt_Tailbud	FALSE
Dr_LOC557268;Xt_Xetrov90001667m	Dr_LOC557268;Xt_sp5l	0	0.616497	0.616497	Eukaryota	Dr_Dorsal organizer;Dr_Endoderm;Dr_Intermediate mesoderm;Dr_Involuting marginal zone;Dr_Notochord;Dr_Presomitic mesoderm	Xt_Endoderm;Xt_Involuting marginal zone;Xt_Notochord;Xt_Presomitic mesoderm;Xt_Spemann organizer;Xt_Tailbud	FALSE
Dr_LOC557268;Xt_znf250	Dr_LOC557268;Xt_sp5l	0	0.616497	0.616497	Eukaryota	Dr_Dorsal organizer;Dr_Endoderm;Dr_Intermediate mesoderm;Dr_Involuting marginal zone;Dr_Notochord;Dr_Presomitic mesoderm	Xt_Endoderm;Xt_Involuting marginal zone;Xt_Notochord;Xt_Presomitic mesoderm;Xt_Spemann organizer;Xt_Tailbud	FALSE
Dr_LOC557268;Xt_LOC101735121-like	Dr_LOC557268;Xt_sp5l	0	0.616497	0.616497	Eukaryota	Dr_Dorsal organizer;Dr_Endoderm;Dr_Intermediate mesoderm;Dr_Involuting marginal zone;Dr_Notochord;Dr_Presomitic mesoderm	Xt_Endoderm;Xt_Involuting marginal zone;Xt_Notochord;Xt_Presomitic mesoderm;Xt_Spemann organizer;Xt_Tailbud	FALSE
Dr_LOC557268;Xt_LOC100496403-like	Dr_LOC557268;Xt_sp5l	0	0.616497	0.616497	Eukaryota	Dr_Dorsal organizer;Dr_Endoderm;Dr_Intermediate mesoderm;Dr_Involuting marginal zone;Dr_Notochord;Dr_Presomitic mesoderm	Xt_Endoderm;Xt_Involuting marginal zone;Xt_Notochord;Xt_Presomitic mesoderm;Xt_Spemann organizer;Xt_Tailbud	TRUE
Xt_fkbp10;Dr_fkbp10a	Xt_fkbp10;Dr_fkbp9	0	0.61631	0.61631	Eukaryota	Dr_Endothelial;Dr_Epidermal progenitor;Dr_Intermediate mesoderm;Dr_Notochord;Dr_Notoplate;Dr_Placodal area;Dr_Presomitic mesoderm	Xt_Endothelial;Xt_Epidermal progenitor;Xt_Intermediate mesoderm;Xt_Notochord;Xt_Notoplate;Xt_Presomitic mesoderm;Xt_Skeletal muscle	FALSE
Xt_dnah1;Dr_LOC103911853	Xt_dnah1;Dr_dnah6	0	0.615417	0.615417	Eukaryota			TRUE
Xt_dnah1;Dr_LOC103911854	Xt_dnah1;Dr_dnah6	0	0.615417	0.615417	Eukaryota			TRUE
Xt_dnah1;Dr_dnah1	Xt_dnah1;Dr_dnah6	0	0.615417	0.615417	Eukaryota			FALSE
Xt_hba-l5;Dr_hbaa1	Xt_hba-l5;Dr_MGC173646	0.237681	0.849482	0.611801	Eukaryota	Dr_Blood	Xt_Blood	FALSE
Dr_hbae1;Xt_hba-l4	Dr_hbae1;Xt_hbe1	0.0831047	0.692286	0.609181	Eukaryota	Dr_Blood	Xt_Blood	TRUE
Xt_bmp7.2;Dr_bmp7a	Xt_bmp7.2;Dr_gdf3	0	0.607541	0.607541	Eukaryota	Dr_Blastula;Dr_Involuting marginal zone;Dr_Neuroectoderm;Dr_Non-neural ectoderm	Xt_Blastula;Xt_Involuting marginal zone;Xt_Neuroectoderm;Xt_Non-neural ectoderm	FALSE
Xt_bmp7.2;Dr_bmp7b	Xt_bmp7.2;Dr_gdf3	0	0.607541	0.607541	Eukaryota	Dr_Blastula;Dr_Involuting marginal zone;Dr_Neuroectoderm;Dr_Non-neural ectoderm	Xt_Blastula;Xt_Involuting marginal zone;Xt_Neuroectoderm;Xt_Non-neural ectoderm	FALSE
Xt_hba-l5;Dr_hbaa1	Xt_hba-l5;Dr_si:ch211-5k11.12	0.237681	0.843407	0.605726	Eukaryota	Dr_Blood	Xt_Blood	FALSE
Dr_si:ch211-5k11.2;Xt_hba-l3	Dr_si:ch211-5k11.2;Xt_hbe1	0.112317	0.716318	0.604001	Eukaryota	Dr_Blood	Xt_Blood	TRUE
Dr_fzd8b;Xt_fzd5	Dr_fzd8b;Xt_frzb2	0	0.601966	0.601966	Eukaryota	Dr_Dorsal organizer;Dr_Forebrain/midbrain	Xt_Pronephric mesenchyme;Xt_Spemann organizer	TRUE
Xt_frzb2;Dr_LOC101884738	Xt_frzb2;Dr_fzd8b	0	0.601966	0.601966	Eukaryota	Dr_Dorsal organizer;Dr_Forebrain/midbrain	Xt_Pronephric mesenchyme;Xt_Spemann organizer	FALSE
Dr_pax5;Xt_pax2	Dr_pax5;Xt_pax8	0	0.600921	0.600921	Eukaryota	Dr_Forebrain/midbrain	Xt_Pronephric mesenchyme	FALSE
Dr_pax5;Xt_pax5	Dr_pax5;Xt_pax8	0	0.600921	0.600921	Eukaryota	Dr_Forebrain/midbrain	Xt_Pronephric mesenchyme	FALSE
Xt_pax8;Dr_pax8	Xt_pax8;Dr_pax5	0	0.600921	0.600921	Eukaryota	Dr_Forebrain/midbrain	Xt_Pronephric mesenchyme	TRUE
Xt_hba-l5;Dr_hbaa1	Xt_hba-l5;Dr_hbbe3	0.237681	0.837907	0.600226	Eukaryota	Dr_Blood	Xt_Blood	FALSE
Dr_si:ch211-5k11.2;Xt_hba2	Dr_si:ch211-5k11.2;Xt_hbd	0.213684	0.812802	0.599119	Eukaryota	Dr_Blood	Xt_Blood	TRUE
Dr_LOC100334599;Xt_hba-l3	Dr_LOC100334599;Xt_hbe1	0.115467	0.713889	0.598422	Eukaryota	Dr_Blood	Xt_Blood	TRUE
Xt_hba1;Dr_hbaa1	Xt_hba1;Dr_MGC173646	0	0.59729	0.59729	Eukaryota	Dr_Blood	Xt_Blood	FALSE
Xt_hba1;Dr_si:ch211-5k11.6	Xt_hba1;Dr_MGC173646	0	0.59729	0.59729	Eukaryota	Dr_Blood	Xt_Blood	TRUE
Dr_hbae3;Xt_hba-l4	Dr_hbae3;Xt_hbe1	0.0893917	0.686507	0.597115	Eukaryota	Dr_Blood	Xt_Blood	TRUE
Xt_hba-l5;Dr_hbaa1	Xt_hba-l5;Dr_hbbe2	0.237681	0.833071	0.59539	Eukaryota	Dr_Blood	Xt_Blood	FALSE
Xt_fkbp10;Dr_fkbp10a	Xt_fkbp10;Dr_fkbp7	0	0.594776	0.594776	Eukaryota	Dr_Epidermal progenitor;Dr_Intermediate mesoderm;Dr_Notochord;Dr_Placodal area;Dr_Presomitic mesoderm	Xt_Endothelial;Xt_Epidermal progenitor;Xt_Intermediate mesoderm;Xt_Notochord;Xt_Presomitic mesoderm;Xt_Skeletal muscle	FALSE
Xt_hbz;Dr_hbaa1	Xt_hbz;Dr_hbbe3	0.217074	0.810858	0.593784	Eukaryota	Dr_Blood	Xt_Blood	FALSE
Xt_dpysl4;Dr_dpysl4	Xt_dpysl4;Dr_dpysl3	0	0.593735	0.593735	Eukaryota	Dr_Neuron;Dr_Rohon-beard neuron	Xt_Neuron;Xt_Rohon-beard neuron	FALSE
Dr_zgc:113886;Xt_LOC101734394	Dr_zgc:113886;Xt_znf518b	0	0.593618	0.593618	Eukaryota	Dr_Blastula	Xt_Blastula	FALSE
Dr_zgc:113886;Xt_znf383	Dr_zgc:113886;Xt_znf518b	0	0.593618	0.593618	Eukaryota	Dr_Blastula	Xt_Blastula	FALSE
Dr_zgc:113886;Xt_znf250	Dr_zgc:113886;Xt_znf518b	0	0.593618	0.593618	Eukaryota	Dr_Blastula	Xt_Blastula	FALSE
Dr_zgc:113886;Xt_Xetrov90008367m	Dr_zgc:113886;Xt_znf518b	0	0.593618	0.593618	Eukaryota	Dr_Blastula	Xt_Blastula	FALSE
Dr_zgc:113886;Xt_LOC100493966	Dr_zgc:113886;Xt_znf518b	0	0.593618	0.593618	Eukaryota	Dr_Blastula	Xt_Blastula	FALSE
Dr_zgc:113886;Xt_Xetrov90029323m	Dr_zgc:113886;Xt_znf518b	0	0.593618	0.593618	Eukaryota	Dr_Blastula	Xt_Blastula	FALSE
Dr_zgc:113886;Xt_LOC101735121-like	Dr_zgc:113886;Xt_znf518b	0	0.593618	0.593618	Eukaryota	Dr_Blastula	Xt_Blastula	FALSE
Dr_zgc:113886;Xt_Xetrov90015421m	Dr_zgc:113886;Xt_znf518b	0	0.593618	0.593618	Eukaryota	Dr_Blastula	Xt_Blastula	FALSE
Dr_zgc:113886;Xt_znf329	Dr_zgc:113886;Xt_znf518b	0	0.593618	0.593618	Eukaryota	Dr_Blastula	Xt_Blastula	FALSE
Dr_zgc:113886;Xt_Xetrov90001667m	Dr_zgc:113886;Xt_znf518b	0	0.593618	0.593618	Eukaryota	Dr_Blastula	Xt_Blastula	FALSE
Dr_zgc:113886;Xt_LOC100496403-like	Dr_zgc:113886;Xt_znf518b	0	0.593618	0.593618	Eukaryota	Dr_Blastula	Xt_Blastula	TRUE
Dr_zgc:113886;Xt_LOC100496561	Dr_zgc:113886;Xt_znf518b	0	0.593618	0.593618	Eukaryota	Dr_Blastula	Xt_Blastula	TRUE
Dr_col7a1;Xt_Xetrov90012754m	Dr_col7a1;Xt_LOC100486063	0	0.593488	0.593488	Eukaryota	Dr_Epidermal progenitor;Dr_Placodal area	Xt_Epidermal progenitor;Xt_Placodal area	FALSE
Dr_col7a1;Xt_Xetrov90012753m	Dr_col7a1;Xt_LOC100486063	0	0.593488	0.593488	Eukaryota	Dr_Epidermal progenitor;Dr_Placodal area	Xt_Epidermal progenitor;Xt_Placodal area	TRUE
Xt_LOC100486063;Dr_LOC100535278	Xt_LOC100486063;Dr_col7a1	0	0.593488	0.593488	Eukaryota	Dr_Epidermal progenitor;Dr_Placodal area	Xt_Epidermal progenitor;Xt_Placodal area	FALSE
Xt_LOC100486063;Dr_col6a6	Xt_LOC100486063;Dr_col7a1	0	0.593488	0.593488	Eukaryota	Dr_Epidermal progenitor;Dr_Placodal area	Xt_Epidermal progenitor;Xt_Placodal area	FALSE
Dr_dpysl5a;Xt_dpysl5	Dr_dpysl5a;Xt_dpysl3	0	0.593108	0.593108	Eukaryota	Dr_Forebrain/midbrain;Dr_Hindbrain;Dr_Neuron;Dr_Rohon-beard neuron	Xt_Eye primordium;Xt_Forebrain/midbrain;Xt_Hindbrain;Xt_Neuron;Xt_Rohon-beard neuron	FALSE
Dr_hoxb9a;Xt_hoxb9	Dr_hoxb9a;Xt_hoxc10	0.0703406	0.663438	0.593097	Eukaryota	Dr_Presomitic mesoderm;Dr_Tailbud	Xt_Presomitic mesoderm;Xt_Skeletal muscle;Xt_Tailbud	FALSE
Dr_LOC100538028;Xt_LOC100488644	Dr_LOC100538028;Xt_MGC107908	0	0.591465	0.591465	Eukaryota			FALSE
Dr_LOC100538028;Xt_LOC100488329	Dr_LOC100538028;Xt_MGC107908	0	0.591465	0.591465	Eukaryota			FALSE
Dr_LOC100538028;Xt_LOC101731491	Dr_LOC100538028;Xt_MGC107908	0	0.591465	0.591465	Eukaryota			FALSE
Dr_foxh1;Xt_foxh1.2	Dr_foxh1;Xt_foxi4.2	0	0.591096	0.591096	Eukaryota	Dr_Neuroectoderm;Dr_Non-neural ectoderm	Xt_Neuroectoderm;Xt_Non-neural ectoderm	TRUE
Xt_anxa2;Dr_anxa2b	Xt_anxa2;Dr_anxa11b	0.0975184	0.68745	0.589931	Eukaryota	Dr_Endoderm;Dr_Epidermal progenitor;Dr_Ionocyte;Dr_Lens;Dr_Otic placode;Dr_Placodal area;Dr_Rare epidermal subtypes;Dr_Secretory epidermal	Xt_Cement gland primordium;Xt_Epidermal progenitor;Xt_Goblet cell;Xt_Hatching gland;Xt_Ionocyte;Xt_Lens;Xt_Otic placode;Xt_Placodal area;Xt_Small secretory cells	TRUE
Dr_myod1;Xt_myod1	Dr_myod1;Xt_myog	0.056464	0.645687	0.589223	Eukaryota	Dr_Presomitic mesoderm;Dr_Skeletal muscle	Xt_Skeletal muscle	TRUE
Dr_zgc:113886;Xt_LOC100496561	Dr_zgc:113886;Xt_bcl6	0	0.589105	0.589105	Eukaryota	Dr_Blastula	Xt_Blastula	TRUE
Dr_zgc:113886;Xt_LOC101734394	Dr_zgc:113886;Xt_bcl6	0	0.589105	0.589105	Eukaryota	Dr_Blastula	Xt_Blastula	FALSE
Dr_zgc:113886;Xt_LOC100496403-like	Dr_zgc:113886;Xt_bcl6	0	0.589105	0.589105	Eukaryota	Dr_Blastula	Xt_Blastula	TRUE
Dr_zgc:113886;Xt_Xetrov90029323m	Dr_zgc:113886;Xt_bcl6	0	0.589105	0.589105	Eukaryota	Dr_Blastula	Xt_Blastula	FALSE
Dr_zgc:113886;Xt_Xetrov90008367m	Dr_zgc:113886;Xt_bcl6	0	0.589105	0.589105	Eukaryota	Dr_Blastula	Xt_Blastula	FALSE
Dr_zgc:113886;Xt_LOC101735121-like	Dr_zgc:113886;Xt_bcl6	0	0.589105	0.589105	Eukaryota	Dr_Blastula	Xt_Blastula	FALSE
Dr_zgc:113886;Xt_znf250	Dr_zgc:113886;Xt_bcl6	0	0.589105	0.589105	Eukaryota	Dr_Blastula	Xt_Blastula	FALSE
Dr_zgc:113886;Xt_znf383	Dr_zgc:113886;Xt_bcl6	0	0.589105	0.589105	Eukaryota	Dr_Blastula	Xt_Blastula	FALSE
Dr_zgc:113886;Xt_znf329	Dr_zgc:113886;Xt_bcl6	0	0.589105	0.589105	Eukaryota	Dr_Blastula	Xt_Blastula	FALSE
Dr_zgc:113886;Xt_Xetrov90001667m	Dr_zgc:113886;Xt_bcl6	0	0.589105	0.589105	Eukaryota	Dr_Blastula	Xt_Blastula	FALSE
Dr_zgc:113886;Xt_Xetrov90015421m	Dr_zgc:113886;Xt_bcl6	0	0.589105	0.589105	Eukaryota	Dr_Blastula	Xt_Blastula	FALSE
Dr_zgc:113886;Xt_LOC100493966	Dr_zgc:113886;Xt_bcl6	0	0.589105	0.589105	Eukaryota	Dr_Blastula	Xt_Blastula	FALSE
Xt_bcl6;Dr_bcl6a	Xt_bcl6;Dr_zgc:113886	0	0.589105	0.589105	Eukaryota	Dr_Blastula	Xt_Blastula	FALSE
Dr_LOC100334599;Xt_hba2	Dr_LOC100334599;Xt_hbd	0.219352	0.807997	0.588644	Eukaryota	Dr_Blood	Xt_Blood	TRUE
Xt_klhl30;Dr_klhl30	Xt_klhl30;Dr_klhl41b	0	0.588628	0.588628	Eukaryota	Dr_Skeletal muscle	Xt_Skeletal muscle	FALSE
Dr_hbae1;Xt_hba-l3	Dr_hbae1;Xt_LOC100216007	0.072172	0.659718	0.587546	Eukaryota	Dr_Blood	Xt_Blood	TRUE
Dr_LOC103909603;Xt_LOC100497284-like	Dr_LOC103909603;Xt_capn13	0	0.587167	0.587167	Eukaryota	Dr_Epidermal progenitor;Dr_Ionocyte;Dr_Placodal area;Dr_Rare epidermal subtypes;Dr_Secretory epidermal	Xt_Cement gland primordium;Xt_Epidermal progenitor;Xt_Goblet cell;Xt_Hatching gland;Xt_Ionocyte;Xt_Placodal area;Xt_Small secretory cells	TRUE
Dr_LOC103909603;Xt_LOC101730581	Dr_LOC103909603;Xt_capn13	0	0.587167	0.587167	Eukaryota	Dr_Epidermal progenitor;Dr_Ionocyte;Dr_Placodal area;Dr_Rare epidermal subtypes;Dr_Secretory epidermal	Xt_Cement gland primordium;Xt_Epidermal progenitor;Xt_Goblet cell;Xt_Hatching gland;Xt_Ionocyte;Xt_Placodal area;Xt_Small secretory cells	TRUE
Dr_LOC103909603;Xt_Xetrov90013012m	Dr_LOC103909603;Xt_capn13	0	0.587167	0.587167	Eukaryota	Dr_Epidermal progenitor;Dr_Ionocyte;Dr_Placodal area;Dr_Rare epidermal subtypes;Dr_Secretory epidermal	Xt_Cement gland primordium;Xt_Epidermal progenitor;Xt_Goblet cell;Xt_Hatching gland;Xt_Ionocyte;Xt_Placodal area;Xt_Small secretory cells	TRUE
Dr_LOC103909603;Xt_LOC101731595	Dr_LOC103909603;Xt_capn13	0	0.587167	0.587167	Eukaryota	Dr_Epidermal progenitor;Dr_Ionocyte;Dr_Placodal area;Dr_Rare epidermal subtypes;Dr_Secretory epidermal	Xt_Cement gland primordium;Xt_Epidermal progenitor;Xt_Goblet cell;Xt_Hatching gland;Xt_Ionocyte;Xt_Placodal area;Xt_Small secretory cells	TRUE
Dr_LOC103909603;Xt_capn2	Dr_LOC103909603;Xt_capn13	0	0.587167	0.587167	Eukaryota	Dr_Epidermal progenitor;Dr_Ionocyte;Dr_Placodal area;Dr_Rare epidermal subtypes;Dr_Secretory epidermal	Xt_Cement gland primordium;Xt_Epidermal progenitor;Xt_Goblet cell;Xt_Hatching gland;Xt_Ionocyte;Xt_Placodal area;Xt_Small secretory cells	FALSE
Dr_LOC103909603;Xt_capn8	Dr_LOC103909603;Xt_capn13	0	0.587167	0.587167	Eukaryota	Dr_Epidermal progenitor;Dr_Ionocyte;Dr_Placodal area;Dr_Rare epidermal subtypes;Dr_Secretory epidermal	Xt_Cement gland primordium;Xt_Epidermal progenitor;Xt_Goblet cell;Xt_Hatching gland;Xt_Ionocyte;Xt_Placodal area;Xt_Small secretory cells	FALSE
Xt_hbz;Dr_hbaa1	Xt_hbz;Dr_MGC173646	0.217074	0.803561	0.586487	Eukaryota	Dr_Blood	Xt_Blood	FALSE
Xt_myh4;Dr_zgc:66156	Xt_myh4;Dr_myhz1.2	0	0.585475	0.585475	Eukaryota			TRUE
Xt_myh4;Dr_LOC100537594	Xt_myh4;Dr_myhz1.2	0	0.585475	0.585475	Eukaryota			FALSE
Xt_myh4;Dr_myhb	Xt_myh4;Dr_myhz1.2	0	0.585475	0.585475	Eukaryota			FALSE
Xt_myh4;Dr_wu:fd14a01	Xt_myh4;Dr_myhz1.2	0	0.585475	0.585475	Eukaryota			FALSE
Xt_tnni1.2;Dr_zgc:112242	Xt_tnni1.2;Dr_tnni1c	0	0.584494	0.584494	Eukaryota	Dr_Skeletal muscle	Xt_Skeletal muscle	FALSE
Xt_lamp1;Dr_lamp1	Xt_lamp1;Dr_lamp2	0	0.581469	0.581469	Eukaryota	Dr_Blastula;Dr_Dorsal organizer;Dr_Involuting marginal zone;Dr_Neuroectoderm;Dr_Notochord	Xt_Blastula;Xt_Involuting marginal zone;Xt_Neuroectoderm;Xt_Non-neural ectoderm;Xt_Notochord;Xt_Spemann organizer	FALSE
Xt_synpo2l;Dr_synpo2la	Xt_synpo2l;Dr_ldb3b	0	0.580076	0.580076	Eukaryota	Dr_Skeletal muscle	Xt_Skeletal muscle	FALSE
Xt_tnni2;Dr_tnni2a.1	Xt_tnni2;Dr_tnni1al	0	0.578175	0.578175	Eukaryota			FALSE
Dr_hbae1;Xt_hba-l4	Dr_hbae1;Xt_LOC100216007	0.0831047	0.659718	0.576613	Eukaryota	Dr_Blood	Xt_Blood	TRUE
Dr_fzd8b;Xt_fzd5	Dr_fzd8b;Xt_frzb	0	0.575897	0.575897	Eukaryota	Dr_Dorsal organizer	Xt_Spemann organizer	TRUE
Dr_hbae3;Xt_hba-l3	Dr_hbae3;Xt_hbe1	0.112611	0.686507	0.573895	Eukaryota	Dr_Blood	Xt_Blood	TRUE
Xt_myh8-like;Dr_wu:fd14a01	Xt_myh8-like;Dr_myhz1.2	0	0.572046	0.572046	Eukaryota			FALSE
Xt_myh8-like;Dr_zgc:66156	Xt_myh8-like;Dr_myhz1.2	0	0.572046	0.572046	Eukaryota			TRUE
Xt_myh8-like;Dr_myhb	Xt_myh8-like;Dr_myhz1.2	0	0.572046	0.572046	Eukaryota			FALSE
Xt_myh8-like;Dr_LOC100537594	Xt_myh8-like;Dr_myhz1.2	0	0.572046	0.572046	Eukaryota			FALSE
Xt_hba1;Dr_si:xx-by187g17.1	Xt_hba1;Dr_hbbe3	0.0781391	0.649916	0.571777	Eukaryota	Dr_Blood	Xt_Blood	FALSE
Xt_anxa2;Dr_anxa2b	Xt_anxa2;Dr_LOC103908630	0.0975184	0.66881	0.571291	Eukaryota	Dr_Endoderm;Dr_Epidermal progenitor;Dr_Ionocyte;Dr_Lens;Dr_Otic placode;Dr_Placodal area;Dr_Rare epidermal subtypes;Dr_Secretory epidermal	Xt_Cement gland primordium;Xt_Epidermal progenitor;Xt_Goblet cell;Xt_Hatching gland;Xt_Ionocyte;Xt_Lens;Xt_Otic placode;Xt_Placodal area;Xt_Small secretory cells	TRUE
Xt_hba1;Dr_hbaa1	Xt_hba1;Dr_hbbe2	0	0.570562	0.570562	Eukaryota	Dr_Blood	Xt_Blood	FALSE
Xt_hba1;Dr_si:ch211-5k11.6	Xt_hba1;Dr_hbbe2	0	0.570562	0.570562	Eukaryota	Dr_Blood	Xt_Blood	TRUE
Dr_hoxa13a;Xt_hoxa13	Dr_hoxa13a;Xt_hoxc10	0	0.570099	0.570099	Eukaryota	Dr_Presomitic mesoderm	Xt_Presomitic mesoderm;Xt_Skeletal muscle;Xt_Tailbud	FALSE
Xt_hba-l5;Dr_hbaa1	Xt_hba-l5;Dr_hbbe1.1	0.237681	0.807584	0.569903	Eukaryota	Dr_Blood	Xt_Blood	FALSE
Dr_myod1;Xt_myod1	Dr_myod1;Xt_myf6	0.056464	0.62608	0.569616	Eukaryota	Dr_Presomitic mesoderm;Dr_Skeletal muscle	Xt_Skeletal muscle	TRUE
Dr_LOC100334599;Xt_hba-l4	Dr_LOC100334599;Xt_LOC100216007	0.0934624	0.661779	0.568317	Eukaryota	Dr_Blood	Xt_Blood	TRUE
Xt_rasip1-like;Dr_radil	Xt_rasip1-like;Dr_rasip1	0	0.568216	0.568216	Eukaryota			FALSE
Xt_rasip1-like;Dr_si:ch73-281f12.4	Xt_rasip1-like;Dr_rasip1	0	0.568216	0.568216	Eukaryota			TRUE
Xt_rasip1-like;Dr_LOC572157	Xt_rasip1-like;Dr_rasip1	0	0.568216	0.568216	Eukaryota			FALSE
Xt_hbz;Dr_hbaa1	Xt_hbz;Dr_hbbe2	0.217074	0.784656	0.567582	Eukaryota	Dr_Blood	Xt_Blood	FALSE
Dr_si:ch211-5k11.2;Xt_hba-l4	Dr_si:ch211-5k11.2;Xt_LOC100216007	0.0939991	0.661375	0.567376	Eukaryota	Dr_Blood	Xt_Blood	TRUE
Dr_hbae1;Xt_hba2	Dr_hbae1;Xt_hbe1	0.125083	0.692286	0.567202	Eukaryota	Dr_Blood	Xt_Blood	TRUE
Dr_LOC100334599;Xt_hba-l4	Dr_LOC100334599;Xt_LOC100037901	0.0934624	0.659554	0.566092	Eukaryota	Dr_Blood	Xt_Blood	TRUE
Xt_hbz;Dr_hbaa1	Xt_hbz;Dr_hbbe1.1	0.217074	0.782569	0.565495	Eukaryota	Dr_Blood	Xt_Blood	FALSE
Dr_si:dkeyp-87a6.1;Xt_Xetrov90026166m	Dr_si:dkeyp-87a6.1;Xt_dnah1	0	0.564583	0.564583	Eukaryota			TRUE
Xt_dnah1;Dr_dnah1	Xt_dnah1;Dr_si:dkeyp-87a6.1	0	0.564583	0.564583	Eukaryota			FALSE
Xt_dnah1;Dr_LOC103911854	Xt_dnah1;Dr_si:dkeyp-87a6.1	0	0.564583	0.564583	Eukaryota			TRUE
Xt_dnah1;Dr_LOC103911853	Xt_dnah1;Dr_si:dkeyp-87a6.1	0	0.564583	0.564583	Eukaryota			TRUE
Dr_si:ch211-5k11.2;Xt_hba-l4	Dr_si:ch211-5k11.2;Xt_LOC100037901	0.0939991	0.658469	0.56447	Eukaryota	Dr_Blood	Xt_Blood	TRUE
Dr_hbae3;Xt_hba2	Dr_hbae3;Xt_hbd	0.213042	0.777392	0.56435	Eukaryota	Dr_Blood	Xt_Blood	TRUE
Xt_hba-l2;Dr_si:ch211-5k11.6	Xt_hba-l2;Dr_zgc:163057	0	0.563567	0.563567	Eukaryota	Dr_Blood	Xt_Blood	TRUE
Xt_col5a1-like;Dr_col5a1	Xt_col5a1-like;Dr_col9a3	0.224044	0.784772	0.560728	Eukaryota	Dr_Intermediate mesoderm;Dr_Notochord;Dr_Notoplate	Xt_Endothelial;Xt_Notochord;Xt_Notoplate	FALSE
Xt_LOC733709;Dr_her5	Xt_LOC733709;Dr_hes6	0	0.560528	0.560528	Eukaryota	Dr_Presomitic mesoderm;Dr_Tailbud	Xt_Presomitic mesoderm;Xt_Tailbud	FALSE
Xt_t;Dr_t	Xt_t;Dr_tbx16	0	0.559862	0.559862	Eukaryota	Dr_Dorsal organizer;Dr_Involuting marginal zone;Dr_Notochord;Dr_Presomitic mesoderm	Xt_Involuting marginal zone;Xt_Notochord;Xt_Presomitic mesoderm;Xt_Spemann organizer;Xt_Tailbud	FALSE
Xt_dpysl4;Dr_dpysl4	Xt_dpysl4;Dr_dpysl2b	0	0.559767	0.559767	Eukaryota	Dr_Forebrain/midbrain;Dr_Hindbrain;Dr_Neuron;Dr_Rohon-beard neuron;Dr_Tailbud	Xt_Eye primordium;Xt_Forebrain/midbrain;Xt_Hindbrain;Xt_Neuron;Xt_Rohon-beard neuron	FALSE
Xt_hnrnpa2b1;Dr_hnrnpa3	Xt_hnrnpa2b1;Dr_hnrnpa0a	0	0.55856	0.55856	Eukaryota	Dr_Dorsal organizer;Dr_Endoderm;Dr_Forebrain/midbrain;Dr_Hindbrain;Dr_Intermediate mesoderm;Dr_Involuting marginal zone;Dr_Neuroectoderm;Dr_Neuron;Dr_Non-neural ectoderm;Dr_Notochord;Dr_Presomitic mesoderm;Dr_Rohon-beard neuron;Dr_Tailbud	Xt_Endoderm;Xt_Eye primordium;Xt_Forebrain/midbrain;Xt_Hindbrain;Xt_Involuting marginal zone;Xt_Neuroectoderm;Xt_Neuron;Xt_Non-neural ectoderm;Xt_Rohon-beard neuron;Xt_Spemann organizer;Xt_Tailbud	FALSE
Xt_hnrnpa2b1;Dr_hnrnpa1b	Xt_hnrnpa2b1;Dr_hnrnpa0a	0	0.55856	0.55856	Eukaryota	Dr_Dorsal organizer;Dr_Endoderm;Dr_Forebrain/midbrain;Dr_Hindbrain;Dr_Intermediate mesoderm;Dr_Involuting marginal zone;Dr_Neuroectoderm;Dr_Neuron;Dr_Non-neural ectoderm;Dr_Notochord;Dr_Presomitic mesoderm;Dr_Rohon-beard neuron;Dr_Tailbud	Xt_Endoderm;Xt_Eye primordium;Xt_Forebrain/midbrain;Xt_Hindbrain;Xt_Involuting marginal zone;Xt_Neuroectoderm;Xt_Neuron;Xt_Non-neural ectoderm;Xt_Rohon-beard neuron;Xt_Spemann organizer;Xt_Tailbud	FALSE
Xt_hba1;Dr_si:xx-by187g17.1	Xt_hba1;Dr_hbbe1.1	0.0781391	0.633576	0.555437	Eukaryota	Dr_Blood	Xt_Blood	FALSE
Xt_col6a1;Dr_col6a1	Xt_col6a1;Dr_col12a1	0	0.553795	0.553795	Eukaryota	Dr_Epidermal progenitor;Dr_Placodal area	Xt_Epidermal progenitor	FALSE
Xt_hba-l2;Dr_hbaa1	Xt_hba-l2;Dr_hbbe3	0.145475	0.699084	0.553608	Eukaryota	Dr_Blood	Xt_Blood	FALSE
Xt_morn5;Dr_morn5	Xt_morn5;Dr_im:6909388	0.104862	0.657258	0.552396	Eukaryota			FALSE
Xt_col5a1-like;Dr_col5a1	Xt_col5a1-like;Dr_col9a1b	0.224044	0.775621	0.551577	Eukaryota	Dr_Notochord;Dr_Notoplate	Xt_Notochord;Xt_Notoplate	FALSE
Xt_hes7.2;Dr_her5	Xt_hes7.2;Dr_her1	0	0.550561	0.550561	Eukaryota	Dr_Involuting marginal zone;Dr_Presomitic mesoderm	Xt_Involuting marginal zone;Xt_Presomitic mesoderm;Xt_Skeletal muscle;Xt_Tailbud	FALSE
Xt_hba1;Dr_si:xx-by187g17.1	Xt_hba1;Dr_si:ch211-5k11.12	0.0781391	0.628301	0.550161	Eukaryota	Dr_Blood	Xt_Blood	FALSE
Dr_capn8;Xt_LOC100497284-like	Dr_capn8;Xt_capn13	0	0.549678	0.549678	Eukaryota	Dr_Epidermal progenitor;Dr_Hatching gland;Dr_Ionocyte;Dr_Placodal area;Dr_Rare epidermal subtypes;Dr_Secretory epidermal	Xt_Cement gland primordium;Xt_Epidermal progenitor;Xt_Goblet cell;Xt_Hatching gland;Xt_Ionocyte;Xt_Placodal area;Xt_Small secretory cells	TRUE
Dr_capn8;Xt_capn8	Dr_capn8;Xt_capn13	0	0.549678	0.549678	Eukaryota	Dr_Epidermal progenitor;Dr_Hatching gland;Dr_Ionocyte;Dr_Placodal area;Dr_Rare epidermal subtypes;Dr_Secretory epidermal	Xt_Cement gland primordium;Xt_Epidermal progenitor;Xt_Goblet cell;Xt_Hatching gland;Xt_Ionocyte;Xt_Placodal area;Xt_Small secretory cells	FALSE
Dr_capn8;Xt_LOC101730581	Dr_capn8;Xt_capn13	0	0.549678	0.549678	Eukaryota	Dr_Epidermal progenitor;Dr_Hatching gland;Dr_Ionocyte;Dr_Placodal area;Dr_Rare epidermal subtypes;Dr_Secretory epidermal	Xt_Cement gland primordium;Xt_Epidermal progenitor;Xt_Goblet cell;Xt_Hatching gland;Xt_Ionocyte;Xt_Placodal area;Xt_Small secretory cells	TRUE
Dr_capn8;Xt_LOC101731595	Dr_capn8;Xt_capn13	0	0.549678	0.549678	Eukaryota	Dr_Epidermal progenitor;Dr_Hatching gland;Dr_Ionocyte;Dr_Placodal area;Dr_Rare epidermal subtypes;Dr_Secretory epidermal	Xt_Cement gland primordium;Xt_Epidermal progenitor;Xt_Goblet cell;Xt_Hatching gland;Xt_Ionocyte;Xt_Placodal area;Xt_Small secretory cells	TRUE
Dr_capn8;Xt_capn2	Dr_capn8;Xt_capn13	0	0.549678	0.549678	Eukaryota	Dr_Epidermal progenitor;Dr_Hatching gland;Dr_Ionocyte;Dr_Placodal area;Dr_Rare epidermal subtypes;Dr_Secretory epidermal	Xt_Cement gland primordium;Xt_Epidermal progenitor;Xt_Goblet cell;Xt_Hatching gland;Xt_Ionocyte;Xt_Placodal area;Xt_Small secretory cells	FALSE
Dr_capn8;Xt_Xetrov90013012m	Dr_capn8;Xt_capn13	0	0.549678	0.549678	Eukaryota	Dr_Epidermal progenitor;Dr_Hatching gland;Dr_Ionocyte;Dr_Placodal area;Dr_Rare epidermal subtypes;Dr_Secretory epidermal	Xt_Cement gland primordium;Xt_Epidermal progenitor;Xt_Goblet cell;Xt_Hatching gland;Xt_Ionocyte;Xt_Placodal area;Xt_Small secretory cells	TRUE
Dr_si:ch211-5k11.2;Xt_hba-l3	Dr_si:ch211-5k11.2;Xt_LOC100216007	0.112317	0.661375	0.549058	Eukaryota	Dr_Blood	Xt_Blood	TRUE
Dr_LOC103908654;Xt_LOC100493966	Dr_LOC103908654;Xt_ctcf	0	0.548299	0.548299	Eukaryota	Dr_Blastula;Dr_Involuting marginal zone;Dr_Neuroectoderm;Dr_Non-neural ectoderm	Xt_Blastula;Xt_Involuting marginal zone;Xt_Neuroectoderm;Xt_Non-neural ectoderm	FALSE
Dr_LOC103908654;Xt_znf250	Dr_LOC103908654;Xt_ctcf	0	0.548299	0.548299	Eukaryota	Dr_Blastula;Dr_Involuting marginal zone;Dr_Neuroectoderm;Dr_Non-neural ectoderm	Xt_Blastula;Xt_Involuting marginal zone;Xt_Neuroectoderm;Xt_Non-neural ectoderm	FALSE
Dr_LOC103908654;Xt_Xetrov90015421m	Dr_LOC103908654;Xt_ctcf	0	0.548299	0.548299	Eukaryota	Dr_Blastula;Dr_Involuting marginal zone;Dr_Neuroectoderm;Dr_Non-neural ectoderm	Xt_Blastula;Xt_Involuting marginal zone;Xt_Neuroectoderm;Xt_Non-neural ectoderm	FALSE
Dr_LOC103908654;Xt_LOC100496561	Dr_LOC103908654;Xt_ctcf	0	0.548299	0.548299	Eukaryota	Dr_Blastula;Dr_Involuting marginal zone;Dr_Neuroectoderm;Dr_Non-neural ectoderm	Xt_Blastula;Xt_Involuting marginal zone;Xt_Neuroectoderm;Xt_Non-neural ectoderm	TRUE
Dr_LOC103908654;Xt_Xetrov90001667m	Dr_LOC103908654;Xt_ctcf	0	0.548299	0.548299	Eukaryota	Dr_Blastula;Dr_Involuting marginal zone;Dr_Neuroectoderm;Dr_Non-neural ectoderm	Xt_Blastula;Xt_Involuting marginal zone;Xt_Neuroectoderm;Xt_Non-neural ectoderm	FALSE
Dr_LOC103908654;Xt_LOC101735121-like	Dr_LOC103908654;Xt_ctcf	0	0.548299	0.548299	Eukaryota	Dr_Blastula;Dr_Involuting marginal zone;Dr_Neuroectoderm;Dr_Non-neural ectoderm	Xt_Blastula;Xt_Involuting marginal zone;Xt_Neuroectoderm;Xt_Non-neural ectoderm	FALSE
Dr_LOC103908654;Xt_znf383	Dr_LOC103908654;Xt_ctcf	0	0.548299	0.548299	Eukaryota	Dr_Blastula;Dr_Involuting marginal zone;Dr_Neuroectoderm;Dr_Non-neural ectoderm	Xt_Blastula;Xt_Involuting marginal zone;Xt_Neuroectoderm;Xt_Non-neural ectoderm	FALSE
Dr_LOC103908654;Xt_Xetrov90008367m	Dr_LOC103908654;Xt_ctcf	0	0.548299	0.548299	Eukaryota	Dr_Blastula;Dr_Involuting marginal zone;Dr_Neuroectoderm;Dr_Non-neural ectoderm	Xt_Blastula;Xt_Involuting marginal zone;Xt_Neuroectoderm;Xt_Non-neural ectoderm	FALSE
Dr_LOC103908654;Xt_znf329	Dr_LOC103908654;Xt_ctcf	0	0.548299	0.548299	Eukaryota	Dr_Blastula;Dr_Involuting marginal zone;Dr_Neuroectoderm;Dr_Non-neural ectoderm	Xt_Blastula;Xt_Involuting marginal zone;Xt_Neuroectoderm;Xt_Non-neural ectoderm	FALSE
Dr_LOC103908654;Xt_LOC101734394	Dr_LOC103908654;Xt_ctcf	0	0.548299	0.548299	Eukaryota	Dr_Blastula;Dr_Involuting marginal zone;Dr_Neuroectoderm;Dr_Non-neural ectoderm	Xt_Blastula;Xt_Involuting marginal zone;Xt_Neuroectoderm;Xt_Non-neural ectoderm	FALSE
Xt_tbpl1;Dr_tbpl1	Xt_tbpl1;Dr_tbp	0.0465789	0.594644	0.548065	Eukaryota	Dr_Blastula	Xt_Blastula	FALSE
Dr_LOC100538070;Xt_LOC101731491	Dr_LOC100538070;Xt_MGC107908	0	0.547743	0.547743	Eukaryota			FALSE
Dr_LOC100538070;Xt_LOC100488644	Dr_LOC100538070;Xt_MGC107908	0	0.547743	0.547743	Eukaryota			FALSE
Dr_LOC100538070;Xt_LOC100488329	Dr_LOC100538070;Xt_MGC107908	0	0.547743	0.547743	Eukaryota			FALSE
Xt_foxa4;Dr_foxa1	Xt_foxa4;Dr_foxa3	0	0.547162	0.547162	Eukaryota	Dr_Dorsal organizer;Dr_Endoderm;Dr_Involuting marginal zone;Dr_Notochord	Xt_Endoderm;Xt_Involuting marginal zone;Xt_Notochord;Xt_Spemann organizer	FALSE
Dr_hbae3;Xt_hba-l4	Dr_hbae3;Xt_LOC100216007	0.0893917	0.635942	0.54655	Eukaryota	Dr_Blood	Xt_Blood	TRUE
Dr_LOC100334599;Xt_hba-l3	Dr_LOC100334599;Xt_LOC100216007	0.115467	0.661779	0.546312	Eukaryota	Dr_Blood	Xt_Blood	TRUE
Dr_si:ch211-5k11.2;Xt_hba-l3	Dr_si:ch211-5k11.2;Xt_LOC100037901	0.112317	0.658469	0.546153	Eukaryota	Dr_Blood	Xt_Blood	TRUE
Dr_hbae3;Xt_hba-l4	Dr_hbae3;Xt_LOC100037901	0.0893917	0.635339	0.545947	Eukaryota	Dr_Blood	Xt_Blood	TRUE
Dr_si:dkey-261e22.1;Xt_nuak1	Dr_si:dkey-261e22.1;Xt_LOC100485259	0	0.54579	0.54579	Eukaryota	Dr_Endothelial;Dr_Epidermal progenitor;Dr_Intermediate mesoderm;Dr_Placodal area	Xt_Endothelial;Xt_Epidermal progenitor;Xt_Placodal area	FALSE
Xt_LOC100485259;Dr_LOC101885029	Xt_LOC100485259;Dr_si:dkey-261e22.1	0	0.54579	0.54579	Eukaryota	Dr_Endothelial;Dr_Epidermal progenitor;Dr_Intermediate mesoderm;Dr_Placodal area	Xt_Endothelial;Xt_Epidermal progenitor;Xt_Placodal area	TRUE
Xt_tnni2;Dr_tnni2a.1	Xt_tnni2;Dr_tnni2a.4	0	0.54542	0.54542	Eukaryota			FALSE
Dr_LOC100538028;Xt_LOC101731491	Dr_LOC100538028;Xt_fgl2	0	0.544936	0.544936	Eukaryota			FALSE
Xt_fgl2;Dr_fgl2a	Xt_fgl2;Dr_LOC100538028	0	0.544936	0.544936	Eukaryota			FALSE
Dr_LOC100538028;Xt_LOC100488329	Dr_LOC100538028;Xt_fgl2	0	0.544936	0.544936	Eukaryota			FALSE
Xt_fgl2;Dr_si:ch211-236c15.2	Xt_fgl2;Dr_LOC100538028	0	0.544936	0.544936	Eukaryota			FALSE
Dr_LOC100538028;Xt_LOC100488644	Dr_LOC100538028;Xt_fgl2	0	0.544936	0.544936	Eukaryota			FALSE
Dr_znf1137;Xt_znf329	Dr_znf1137;Xt_znf281	0	0.544638	0.544638	Eukaryota	Dr_Blastula;Dr_Involuting marginal zone;Dr_Neuroectoderm;Dr_Non-neural ectoderm	Xt_Blastula;Xt_Involuting marginal zone;Xt_Neuroectoderm;Xt_Non-neural ectoderm	FALSE
Dr_znf1137;Xt_LOC100493966	Dr_znf1137;Xt_znf281	0	0.544638	0.544638	Eukaryota	Dr_Blastula;Dr_Involuting marginal zone;Dr_Neuroectoderm;Dr_Non-neural ectoderm	Xt_Blastula;Xt_Involuting marginal zone;Xt_Neuroectoderm;Xt_Non-neural ectoderm	FALSE
Xt_znf281;Dr_LOC100005963	Xt_znf281;Dr_znf1137	0	0.544638	0.544638	Eukaryota	Dr_Blastula;Dr_Involuting marginal zone;Dr_Neuroectoderm;Dr_Non-neural ectoderm	Xt_Blastula;Xt_Involuting marginal zone;Xt_Neuroectoderm;Xt_Non-neural ectoderm	FALSE
Dr_znf1137;Xt_znf250	Dr_znf1137;Xt_znf281	0	0.544638	0.544638	Eukaryota	Dr_Blastula;Dr_Involuting marginal zone;Dr_Neuroectoderm;Dr_Non-neural ectoderm	Xt_Blastula;Xt_Involuting marginal zone;Xt_Neuroectoderm;Xt_Non-neural ectoderm	FALSE
Dr_LOC100334599;Xt_hba-l3	Dr_LOC100334599;Xt_LOC100037901	0.115467	0.659554	0.544087	Eukaryota	Dr_Blood	Xt_Blood	TRUE
Dr_hoxc9a;Xt_hoxc9	Dr_hoxc9a;Xt_hoxc10	0.145358	0.688025	0.542666	Eukaryota	Dr_Presomitic mesoderm;Dr_Tailbud	Xt_Presomitic mesoderm;Xt_Skeletal muscle;Xt_Tailbud	FALSE
Dr_LOC100006216;Xt_Xetrov90015421m	Dr_LOC100006216;Xt_sp5l	0.148956	0.691103	0.542147	Eukaryota	Dr_Dorsal organizer;Dr_Endoderm;Dr_Intermediate mesoderm;Dr_Involuting marginal zone;Dr_Notochord;Dr_Presomitic mesoderm	Xt_Endoderm;Xt_Involuting marginal zone;Xt_Notochord;Xt_Presomitic mesoderm;Xt_Spemann organizer;Xt_Tailbud	FALSE
Dr_hoxd13a;Xt_hoxd13	Dr_hoxd13a;Xt_hoxc10	0	0.541642	0.541642	Eukaryota	Dr_Presomitic mesoderm	Xt_Presomitic mesoderm;Xt_Skeletal muscle;Xt_Tailbud	TRUE
Dr_capn2l;Xt_LOC101733523	Dr_capn2l;Xt_capn13	0	0.541462	0.541462	Eukaryota	Dr_Ionocyte;Dr_Rare epidermal subtypes;Dr_Secretory epidermal	Xt_Cement gland primordium;Xt_Goblet cell;Xt_Hatching gland;Xt_Ionocyte;Xt_Small secretory cells	TRUE
Dr_capn2l;Xt_capn2.2	Dr_capn2l;Xt_capn13	0	0.541462	0.541462	Eukaryota	Dr_Ionocyte;Dr_Rare epidermal subtypes;Dr_Secretory epidermal	Xt_Cement gland primordium;Xt_Goblet cell;Xt_Hatching gland;Xt_Ionocyte;Xt_Small secretory cells	FALSE
Dr_hbae1;Xt_hba-l3	Dr_hbae1;Xt_LOC100037901	0.072172	0.612721	0.540549	Eukaryota	Dr_Blood	Xt_Blood	TRUE
Dr_hoxa10b;Xt_hoxa10	Dr_hoxa10b;Xt_hoxc10	0.183478	0.723527	0.540049	Eukaryota	Dr_Presomitic mesoderm;Dr_Tailbud	Xt_Presomitic mesoderm;Xt_Skeletal muscle;Xt_Tailbud	FALSE
Xt_hoxa11;Dr_hoxa11b	Xt_hoxa11;Dr_hoxb10a	0	0.539691	0.539691	Eukaryota	Dr_Presomitic mesoderm	Xt_Presomitic mesoderm	FALSE
Xt_myh4;Dr_wu:fd14a01	Xt_myh4;Dr_ns:zf-e68	0	0.539421	0.539421	Eukaryota	Dr_Skeletal muscle	Xt_Skeletal muscle	FALSE
Xt_myh4;Dr_LOC100537594	Xt_myh4;Dr_ns:zf-e68	0	0.539421	0.539421	Eukaryota	Dr_Skeletal muscle	Xt_Skeletal muscle	FALSE
Xt_myh4;Dr_zgc:66156	Xt_myh4;Dr_ns:zf-e68	0	0.539421	0.539421	Eukaryota	Dr_Skeletal muscle	Xt_Skeletal muscle	TRUE
Xt_myh4;Dr_myhb	Xt_myh4;Dr_ns:zf-e68	0	0.539421	0.539421	Eukaryota	Dr_Skeletal muscle	Xt_Skeletal muscle	FALSE
Xt_LOC100486063;Dr_LOC100535278	Xt_LOC100486063;Dr_col12a1	0	0.539364	0.539364	Eukaryota	Dr_Epidermal progenitor;Dr_Placodal area	Xt_Epidermal progenitor;Xt_Placodal area	FALSE
Xt_LOC100486063;Dr_col6a6	Xt_LOC100486063;Dr_col12a1	0	0.539364	0.539364	Eukaryota	Dr_Epidermal progenitor;Dr_Placodal area	Xt_Epidermal progenitor;Xt_Placodal area	FALSE
Xt_t2;Dr_t	Xt_t2;Dr_LOC100334188	0	0.539155	0.539155	Eukaryota	Dr_Notochord	Xt_Notochord	FALSE
Dr_znf1137;Xt_LOC100496561	Dr_znf1137;Xt_znf281	0.00565628	0.544638	0.538981	Eukaryota	Dr_Blastula;Dr_Involuting marginal zone;Dr_Neuroectoderm;Dr_Non-neural ectoderm	Xt_Blastula;Xt_Involuting marginal zone;Xt_Neuroectoderm;Xt_Non-neural ectoderm	TRUE
Xt_fgl2;Dr_fgl2a	Xt_fgl2;Dr_si:ch1073-110a20.1	0	0.538663	0.538663	Eukaryota			FALSE
Xt_fgl2;Dr_si:ch211-236c15.2	Xt_fgl2;Dr_si:ch1073-110a20.1	0	0.538663	0.538663	Eukaryota			FALSE
Xt_hba-l2;Dr_hbaa1	Xt_hba-l2;Dr_MGC173646	0.145475	0.684031	0.538555	Eukaryota	Dr_Blood	Xt_Blood	FALSE
Xt_sall1;Dr_LOC100149526	Xt_sall1;Dr_sall4	0	0.538022	0.538022	Eukaryota	Dr_Dorsal organizer;Dr_Endoderm;Dr_Involuting marginal zone;Dr_Neuroectoderm;Dr_Non-neural ectoderm;Dr_Notochord;Dr_Presomitic mesoderm;Dr_Tailbud	Xt_Endoderm;Xt_Involuting marginal zone;Xt_Neuroectoderm;Xt_Non-neural ectoderm;Xt_Notochord;Xt_Presomitic mesoderm;Xt_Spemann organizer;Xt_Tailbud	FALSE
Dr_cetn2;Xt_cetn1	Dr_cetn2;Xt_cetn3	0	0.536507	0.536507	Eukaryota			FALSE
Dr_hbae1;Xt_hba2	Dr_hbae1;Xt_LOC100216007	0.125083	0.659718	0.534635	Eukaryota	Dr_Blood	Xt_Blood	TRUE
Dr_zgc:174275;Xt_znf329	Dr_zgc:174275;Xt_znf281	0	0.533807	0.533807	Eukaryota	Dr_Blastula;Dr_Involuting marginal zone;Dr_Neuroectoderm;Dr_Non-neural ectoderm	Xt_Blastula;Xt_Involuting marginal zone;Xt_Neuroectoderm;Xt_Non-neural ectoderm	FALSE
Xt_znf281;Dr_LOC100005963	Xt_znf281;Dr_zgc:174275	0	0.533807	0.533807	Eukaryota	Dr_Blastula;Dr_Involuting marginal zone;Dr_Neuroectoderm;Dr_Non-neural ectoderm	Xt_Blastula;Xt_Involuting marginal zone;Xt_Neuroectoderm;Xt_Non-neural ectoderm	FALSE
Dr_zgc:174275;Xt_LOC100493966	Dr_zgc:174275;Xt_znf281	0	0.533807	0.533807	Eukaryota	Dr_Blastula;Dr_Involuting marginal zone;Dr_Neuroectoderm;Dr_Non-neural ectoderm	Xt_Blastula;Xt_Involuting marginal zone;Xt_Neuroectoderm;Xt_Non-neural ectoderm	FALSE
Dr_znf1137;Xt_LOC101735121-like	Dr_znf1137;Xt_znf281	0.0108699	0.544638	0.533768	Eukaryota	Dr_Blastula;Dr_Involuting marginal zone;Dr_Neuroectoderm;Dr_Non-neural ectoderm	Xt_Blastula;Xt_Involuting marginal zone;Xt_Neuroectoderm;Xt_Non-neural ectoderm	FALSE
Dr_mmp13a;Xt_mmp1	Dr_mmp13a;Xt_mmp13	0	0.533595	0.533595	Eukaryota			FALSE
Dr_mmp13a;Xt_LOC100491214	Dr_mmp13a;Xt_mmp13	0	0.533595	0.533595	Eukaryota			TRUE
Dr_mmp13a;Xt_LOC100494588	Dr_mmp13a;Xt_mmp13	0	0.533595	0.533595	Eukaryota			TRUE
Dr_mmp13a;Xt_LOC100489735	Dr_mmp13a;Xt_mmp13	0	0.533595	0.533595	Eukaryota			TRUE
Dr_mmp13a;Xt_LOC100491547	Dr_mmp13a;Xt_mmp13	0	0.533595	0.533595	Eukaryota			TRUE
Dr_mmp13a;Xt_LOC100489571	Dr_mmp13a;Xt_mmp13	0	0.533595	0.533595	Eukaryota			FALSE
Dr_zgc:174275;Xt_LOC101735121-like	Dr_zgc:174275;Xt_znf281	0.000658014	0.533807	0.533149	Eukaryota	Dr_Blastula;Dr_Involuting marginal zone;Dr_Neuroectoderm;Dr_Non-neural ectoderm	Xt_Blastula;Xt_Involuting marginal zone;Xt_Neuroectoderm;Xt_Non-neural ectoderm	FALSE
Xt_tnni1.2;Dr_zgc:112242	Xt_tnni1.2;Dr_tnni2b.2	0	0.532905	0.532905	Eukaryota			FALSE
Dr_zgc:113886;Xt_LOC100495499	Dr_zgc:113886;Xt_znf518b	0.0608232	0.593618	0.532794	Eukaryota	Dr_Blastula	Xt_Blastula	FALSE
Dr_si:zfos-2330d3.1;Xt_LOC100488329	Dr_si:zfos-2330d3.1;Xt_MGC107908	0	0.531938	0.531938	Eukaryota			FALSE
Dr_si:zfos-2330d3.1;Xt_LOC101731491	Dr_si:zfos-2330d3.1;Xt_MGC107908	0	0.531938	0.531938	Eukaryota			FALSE
Dr_si:zfos-2330d3.1;Xt_LOC100488644	Dr_si:zfos-2330d3.1;Xt_MGC107908	0	0.531938	0.531938	Eukaryota			FALSE
Dr_LOC103908654;Xt_Xetrov90029323m	Dr_LOC103908654;Xt_ctcf	0.016767	0.548299	0.531532	Eukaryota	Dr_Blastula;Dr_Involuting marginal zone;Dr_Neuroectoderm;Dr_Non-neural ectoderm	Xt_Blastula;Xt_Involuting marginal zone;Xt_Neuroectoderm;Xt_Non-neural ectoderm	FALSE
Dr_LOC100334599;Xt_hba-l4	Dr_LOC100334599;Xt_LOC101735171	0.0934624	0.624512	0.531049	Eukaryota	Dr_Blood	Xt_Blood	TRUE
Xt_hba3;Dr_si:xx-by187g17.1	Xt_hba3;Dr_hbbe3	0.423908	0.954636	0.530728	Eukaryota	Dr_Blood	Xt_Blood	FALSE
Xt_anxa2;Dr_anxa2a	Xt_anxa2;Dr_anxa11b	0.157147	0.68745	0.530303	Eukaryota	Dr_Endoderm;Dr_Epidermal progenitor;Dr_Ionocyte;Dr_Lens;Dr_Otic placode;Dr_Placodal area;Dr_Rare epidermal subtypes;Dr_Secretory epidermal	Xt_Cement gland primordium;Xt_Epidermal progenitor;Xt_Goblet cell;Xt_Hatching gland;Xt_Ionocyte;Xt_Lens;Xt_Otic placode;Xt_Placodal area;Xt_Small secretory cells	FALSE
Dr_LOC100334599;Xt_hba-l4	Dr_LOC100334599;Xt_LOC100145107	0.0934624	0.62356	0.530097	Eukaryota	Dr_Blood	Xt_Blood	TRUE
Xt_dnah3;Dr_si:dkey-161j23.4	Xt_dnah3;Dr_dnah6	0	0.529866	0.529866	Eukaryota			FALSE
Dr_hbae1;Xt_hba-l4	Dr_hbae1;Xt_LOC100037901	0.0831047	0.612721	0.529617	Eukaryota	Dr_Blood	Xt_Blood	TRUE
Dr_si:ch211-5k11.2;Xt_hba-l4	Dr_si:ch211-5k11.2;Xt_LOC100145107	0.0939991	0.623609	0.52961	Eukaryota	Dr_Blood	Xt_Blood	TRUE
Dr_si:ch211-5k11.2;Xt_hba-l4	Dr_si:ch211-5k11.2;Xt_LOC101735171	0.0939991	0.623607	0.529608	Eukaryota	Dr_Blood	Xt_Blood	TRUE
Dr_znf1137;Xt_Xetrov90001667m	Dr_znf1137;Xt_znf281	0.0158436	0.544638	0.528794	Eukaryota	Dr_Blastula;Dr_Involuting marginal zone;Dr_Neuroectoderm;Dr_Non-neural ectoderm	Xt_Blastula;Xt_Involuting marginal zone;Xt_Neuroectoderm;Xt_Non-neural ectoderm	FALSE
Dr_zgc:113886;Xt_LOC100495499	Dr_zgc:113886;Xt_bcl6	0.0608232	0.589105	0.528282	Eukaryota	Dr_Blastula	Xt_Blastula	FALSE
Xt_hba-l2;Dr_hbaa1	Xt_hba-l2;Dr_hbbe1.1	0.145475	0.673547	0.528071	Eukaryota	Dr_Blood	Xt_Blood	FALSE
Xt_fgl2;Dr_si:ch211-236c15.2	Xt_fgl2;Dr_LOC100538070	0	0.527726	0.527726	Eukaryota			FALSE
Dr_LOC100538070;Xt_LOC100488329	Dr_LOC100538070;Xt_fgl2	0	0.527726	0.527726	Eukaryota			FALSE
Xt_fgl2;Dr_fgl2a	Xt_fgl2;Dr_LOC100538070	0	0.527726	0.527726	Eukaryota			FALSE
Dr_LOC100538070;Xt_LOC101731491	Dr_LOC100538070;Xt_fgl2	0	0.527726	0.527726	Eukaryota			FALSE
Dr_LOC100538070;Xt_LOC100488644	Dr_LOC100538070;Xt_fgl2	0	0.527726	0.527726	Eukaryota			FALSE
Xt_gsx2;Dr_gsx2	Xt_gsx2;Dr_gsx1	0.0398137	0.567512	0.527698	Eukaryota			FALSE
Xt_hba-l5;Dr_hbaa1	Xt_hba-l5;Dr_zgc:163057	0.237681	0.765059	0.527378	Eukaryota	Dr_Blood	Xt_Blood	FALSE
Dr_hbae3;Xt_hba-l3	Dr_hbae3;Xt_LOC100216007	0.112611	0.635942	0.52333	Eukaryota	Dr_Blood	Xt_Blood	TRUE
Dr_ubtf;Xt_ubtf.2	Dr_ubtf;Xt_hmgb3	0.0347645	0.558048	0.523284	Eukaryota	Dr_Dorsal organizer;Dr_Involuting marginal zone;Dr_Neuroectoderm;Dr_Non-neural ectoderm;Dr_Presomitic mesoderm;Dr_Tailbud	Xt_Hindbrain;Xt_Involuting marginal zone;Xt_Neuroectoderm;Xt_Non-neural ectoderm;Xt_Spemann organizer;Xt_Tailbud	TRUE
Dr_hbae3;Xt_hba-l3	Dr_hbae3;Xt_LOC100037901	0.112611	0.635339	0.522727	Eukaryota	Dr_Blood	Xt_Blood	TRUE
Xt_nme7;Dr_nme7	Xt_nme7;Dr_LOC103911697	0.143495	0.665951	0.522456	Eukaryota			FALSE
Dr_hoxa13b;Xt_hoxa13	Dr_hoxa13b;Xt_hoxc10	0	0.52245	0.52245	Eukaryota			FALSE
Xt_dnah7;Dr_dnah7	Xt_dnah7;Dr_dnah6	0.0359341	0.55783	0.521896	Eukaryota			FALSE
Dr_zgc:174275;Xt_LOC100496561	Dr_zgc:174275;Xt_znf281	0.0119995	0.533807	0.521807	Eukaryota	Dr_Blastula;Dr_Involuting marginal zone;Dr_Neuroectoderm;Dr_Non-neural ectoderm	Xt_Blastula;Xt_Involuting marginal zone;Xt_Neuroectoderm;Xt_Non-neural ectoderm	TRUE
Xt_tctex1d2;Dr_tctex1d2	Xt_tctex1d2;Dr_tctex1d1	0.120394	0.642063	0.521669	Eukaryota			FALSE
Dr_LOC103908654;Xt_LOC100496403-like	Dr_LOC103908654;Xt_ctcf	0.0275308	0.548299	0.520768	Eukaryota	Dr_Blastula;Dr_Involuting marginal zone;Dr_Neuroectoderm;Dr_Non-neural ectoderm	Xt_Blastula;Xt_Involuting marginal zone;Xt_Neuroectoderm;Xt_Non-neural ectoderm	TRUE
Xt_tekt1;Dr_tekt1	Xt_tekt1;Dr_tekt4	0.266522	0.786656	0.520133	Eukaryota			FALSE
Dr_zgc:174275;Xt_Xetrov90001667m	Dr_zgc:174275;Xt_znf281	0.0136898	0.533807	0.520117	Eukaryota	Dr_Blastula;Dr_Involuting marginal zone;Dr_Neuroectoderm;Dr_Non-neural ectoderm	Xt_Blastula;Xt_Involuting marginal zone;Xt_Neuroectoderm;Xt_Non-neural ectoderm	FALSE
Xt_hba1;Dr_si:xx-by187g17.1	Xt_hba1;Dr_MGC173646	0.0781391	0.59729	0.519151	Eukaryota	Dr_Blood	Xt_Blood	FALSE
Xt_hmgb2;Dr_hmgb2a	Xt_hmgb2;Dr_hmgb2b	0	0.518543	0.518543	Eukaryota	Dr_Eye primordium;Dr_Forebrain/midbrain;Dr_Hindbrain;Dr_Intermediate mesoderm;Dr_Neural crest;Dr_Optic;Dr_Presomitic mesoderm;Dr_Tailbud	Xt_Endothelial;Xt_Eye primordium;Xt_Forebrain/midbrain;Xt_Hindbrain;Xt_Intermediate mesoderm;Xt_Neural crest;Xt_Optic;Xt_Presomitic mesoderm;Xt_Pronephric mesenchyme;Xt_Tailbud	FALSE
Xt_tnni1.2;Dr_tnni1al	Xt_tnni1.2;Dr_tnni2b.1	0.432484	0.950824	0.518341	Eukaryota	Dr_Presomitic mesoderm;Dr_Skeletal muscle	Xt_Skeletal muscle	TRUE
Dr_znf1137;Xt_LOC101734394	Dr_znf1137;Xt_znf281	0.0267137	0.544638	0.517924	Eukaryota	Dr_Blastula;Dr_Involuting marginal zone;Dr_Neuroectoderm;Dr_Non-neural ectoderm	Xt_Blastula;Xt_Involuting marginal zone;Xt_Neuroectoderm;Xt_Non-neural ectoderm	FALSE
Xt_myh8-like;Dr_myhb	Xt_myh8-like;Dr_ns:zf-e68	0	0.517639	0.517639	Eukaryota	Dr_Skeletal muscle	Xt_Skeletal muscle	FALSE
Xt_myh8-like;Dr_wu:fd14a01	Xt_myh8-like;Dr_ns:zf-e68	0	0.517639	0.517639	Eukaryota	Dr_Skeletal muscle	Xt_Skeletal muscle	FALSE
Xt_myh8-like;Dr_zgc:66156	Xt_myh8-like;Dr_ns:zf-e68	0	0.517639	0.517639	Eukaryota	Dr_Skeletal muscle	Xt_Skeletal muscle	TRUE
Xt_myh8-like;Dr_LOC100537594	Xt_myh8-like;Dr_ns:zf-e68	0	0.517639	0.517639	Eukaryota	Dr_Skeletal muscle	Xt_Skeletal muscle	FALSE
Xt_col5a1-like;Dr_col5a1	Xt_col5a1-like;Dr_LOC100333762	0.224044	0.738747	0.514703	Eukaryota	Dr_Notochord	Xt_Notochord	FALSE
Dr_LOC103909095;Xt_LOC100496561	Dr_LOC103909095;Xt_ctcf	0	0.514363	0.514363	Eukaryota	Dr_Blastula;Dr_Dorsal organizer;Dr_Involuting marginal zone;Dr_Neuroectoderm;Dr_Non-neural ectoderm	Xt_Blastula;Xt_Involuting marginal zone;Xt_Neuroectoderm;Xt_Non-neural ectoderm;Xt_Spemann organizer	TRUE
Dr_LOC103909095;Xt_Xetrov90015421m	Dr_LOC103909095;Xt_ctcf	0	0.514363	0.514363	Eukaryota	Dr_Blastula;Dr_Dorsal organizer;Dr_Involuting marginal zone;Dr_Neuroectoderm;Dr_Non-neural ectoderm	Xt_Blastula;Xt_Involuting marginal zone;Xt_Neuroectoderm;Xt_Non-neural ectoderm;Xt_Spemann organizer	FALSE
Dr_LOC103909095;Xt_LOC100497179-like	Dr_LOC103909095;Xt_ctcf	0	0.514363	0.514363	Eukaryota	Dr_Blastula;Dr_Dorsal organizer;Dr_Involuting marginal zone;Dr_Neuroectoderm;Dr_Non-neural ectoderm	Xt_Blastula;Xt_Involuting marginal zone;Xt_Neuroectoderm;Xt_Non-neural ectoderm;Xt_Spemann organizer	FALSE
Dr_LOC103909095;Xt_LOC100493966	Dr_LOC103909095;Xt_ctcf	0	0.514363	0.514363	Eukaryota	Dr_Blastula;Dr_Dorsal organizer;Dr_Involuting marginal zone;Dr_Neuroectoderm;Dr_Non-neural ectoderm	Xt_Blastula;Xt_Involuting marginal zone;Xt_Neuroectoderm;Xt_Non-neural ectoderm;Xt_Spemann organizer	FALSE
Dr_LOC103909095;Xt_Xetrov90001667m	Dr_LOC103909095;Xt_ctcf	0	0.514363	0.514363	Eukaryota	Dr_Blastula;Dr_Dorsal organizer;Dr_Involuting marginal zone;Dr_Neuroectoderm;Dr_Non-neural ectoderm	Xt_Blastula;Xt_Involuting marginal zone;Xt_Neuroectoderm;Xt_Non-neural ectoderm;Xt_Spemann organizer	FALSE
Dr_LOC103909095;Xt_Xetrov90029323m	Dr_LOC103909095;Xt_ctcf	0	0.514363	0.514363	Eukaryota	Dr_Blastula;Dr_Dorsal organizer;Dr_Involuting marginal zone;Dr_Neuroectoderm;Dr_Non-neural ectoderm	Xt_Blastula;Xt_Involuting marginal zone;Xt_Neuroectoderm;Xt_Non-neural ectoderm;Xt_Spemann organizer	FALSE
Dr_LOC103909095;Xt_znf329	Dr_LOC103909095;Xt_ctcf	0	0.514363	0.514363	Eukaryota	Dr_Blastula;Dr_Dorsal organizer;Dr_Involuting marginal zone;Dr_Neuroectoderm;Dr_Non-neural ectoderm	Xt_Blastula;Xt_Involuting marginal zone;Xt_Neuroectoderm;Xt_Non-neural ectoderm;Xt_Spemann organizer	FALSE
Dr_LOC103909095;Xt_znf250	Dr_LOC103909095;Xt_ctcf	0	0.514363	0.514363	Eukaryota	Dr_Blastula;Dr_Dorsal organizer;Dr_Involuting marginal zone;Dr_Neuroectoderm;Dr_Non-neural ectoderm	Xt_Blastula;Xt_Involuting marginal zone;Xt_Neuroectoderm;Xt_Non-neural ectoderm;Xt_Spemann organizer	FALSE
Dr_LOC103909095;Xt_LOC100496403-like	Dr_LOC103909095;Xt_ctcf	0	0.514363	0.514363	Eukaryota	Dr_Blastula;Dr_Dorsal organizer;Dr_Involuting marginal zone;Dr_Neuroectoderm;Dr_Non-neural ectoderm	Xt_Blastula;Xt_Involuting marginal zone;Xt_Neuroectoderm;Xt_Non-neural ectoderm;Xt_Spemann organizer	TRUE
Dr_LOC103909095;Xt_Xetrov90015419m	Dr_LOC103909095;Xt_ctcf	0	0.514363	0.514363	Eukaryota	Dr_Blastula;Dr_Dorsal organizer;Dr_Involuting marginal zone;Dr_Neuroectoderm;Dr_Non-neural ectoderm	Xt_Blastula;Xt_Involuting marginal zone;Xt_Neuroectoderm;Xt_Non-neural ectoderm;Xt_Spemann organizer	FALSE
Dr_LOC103909095;Xt_LOC101734394	Dr_LOC103909095;Xt_ctcf	0	0.514363	0.514363	Eukaryota	Dr_Blastula;Dr_Dorsal organizer;Dr_Involuting marginal zone;Dr_Neuroectoderm;Dr_Non-neural ectoderm	Xt_Blastula;Xt_Involuting marginal zone;Xt_Neuroectoderm;Xt_Non-neural ectoderm;Xt_Spemann organizer	FALSE
Dr_LOC103909095;Xt_LOC100495499	Dr_LOC103909095;Xt_ctcf	0	0.514363	0.514363	Eukaryota	Dr_Blastula;Dr_Dorsal organizer;Dr_Involuting marginal zone;Dr_Neuroectoderm;Dr_Non-neural ectoderm	Xt_Blastula;Xt_Involuting marginal zone;Xt_Neuroectoderm;Xt_Non-neural ectoderm;Xt_Spemann organizer	FALSE
Dr_LOC103909095;Xt_znf383	Dr_LOC103909095;Xt_ctcf	0	0.514363	0.514363	Eukaryota	Dr_Blastula;Dr_Dorsal organizer;Dr_Involuting marginal zone;Dr_Neuroectoderm;Dr_Non-neural ectoderm	Xt_Blastula;Xt_Involuting marginal zone;Xt_Neuroectoderm;Xt_Non-neural ectoderm;Xt_Spemann organizer	FALSE
Dr_LOC103909095;Xt_LOC101735121-like	Dr_LOC103909095;Xt_ctcf	0	0.514363	0.514363	Eukaryota	Dr_Blastula;Dr_Dorsal organizer;Dr_Involuting marginal zone;Dr_Neuroectoderm;Dr_Non-neural ectoderm	Xt_Blastula;Xt_Involuting marginal zone;Xt_Neuroectoderm;Xt_Non-neural ectoderm;Xt_Spemann organizer	FALSE
Dr_LOC103909095;Xt_Xetrov90008367m	Dr_LOC103909095;Xt_ctcf	0	0.514363	0.514363	Eukaryota	Dr_Blastula;Dr_Dorsal organizer;Dr_Involuting marginal zone;Dr_Neuroectoderm;Dr_Non-neural ectoderm	Xt_Blastula;Xt_Involuting marginal zone;Xt_Neuroectoderm;Xt_Non-neural ectoderm;Xt_Spemann organizer	FALSE
Xt_hbz;Dr_hbaa1	Xt_hbz;Dr_zgc:163057	0.217074	0.731305	0.514231	Eukaryota	Dr_Blood	Xt_Blood	FALSE
Dr_hbae1;Xt_hba-l3	Dr_hbae1;Xt_LOC100145107	0.072172	0.585398	0.513226	Eukaryota	Dr_Blood	Xt_Blood	TRUE
Xt_dnah1;Dr_LOC103911852	Xt_dnah1;Dr_dnah5	0.104767	0.617816	0.513049	Eukaryota			FALSE
Xt_nme7;Dr_nme7	Xt_nme7;Dr_nme8	0.143495	0.656222	0.512727	Eukaryota			FALSE
Dr_znf1137;Xt_LOC100496403-like	Dr_znf1137;Xt_znf281	0.0324707	0.544638	0.512167	Eukaryota	Dr_Blastula;Dr_Involuting marginal zone;Dr_Neuroectoderm;Dr_Non-neural ectoderm	Xt_Blastula;Xt_Involuting marginal zone;Xt_Neuroectoderm;Xt_Non-neural ectoderm	TRUE
Xt_anxa2;Dr_anxa2a	Xt_anxa2;Dr_LOC103908630	0.157147	0.66881	0.511663	Eukaryota	Dr_Endoderm;Dr_Epidermal progenitor;Dr_Ionocyte;Dr_Lens;Dr_Otic placode;Dr_Placodal area;Dr_Rare epidermal subtypes;Dr_Secretory epidermal	Xt_Cement gland primordium;Xt_Epidermal progenitor;Xt_Goblet cell;Xt_Hatching gland;Xt_Ionocyte;Xt_Lens;Xt_Otic placode;Xt_Placodal area;Xt_Small secretory cells	FALSE
Dr_si:ch211-5k11.2;Xt_hba-l3	Dr_si:ch211-5k11.2;Xt_LOC100145107	0.112317	0.623609	0.511292	Eukaryota	Dr_Blood	Xt_Blood	TRUE
Dr_si:ch211-5k11.2;Xt_hba-l3	Dr_si:ch211-5k11.2;Xt_LOC101735171	0.112317	0.623607	0.51129	Eukaryota	Dr_Blood	Xt_Blood	TRUE
Xt_myh2;Dr_zgc:66156	Xt_myh2;Dr_myhz1.2	0	0.511148	0.511148	Eukaryota			TRUE
Xt_myh2;Dr_LOC100537594	Xt_myh2;Dr_myhz1.2	0	0.511148	0.511148	Eukaryota			FALSE
Xt_myh2;Dr_myhb	Xt_myh2;Dr_myhz1.2	0	0.511148	0.511148	Eukaryota			FALSE
Xt_myh2;Dr_wu:fd14a01	Xt_myh2;Dr_myhz1.2	0	0.511148	0.511148	Eukaryota			FALSE
Dr_hbae3;Xt_hba-l4	Dr_hbae3;Xt_LOC101735171	0.0893917	0.600071	0.510679	Eukaryota	Dr_Blood	Xt_Blood	TRUE
Xt_dnah1;Dr_LOC103911852	Xt_dnah1;Dr_dnah6	0.104767	0.615417	0.51065	Eukaryota			FALSE
Dr_zgc:174275;Xt_LOC101734394	Dr_zgc:174275;Xt_znf281	0.0234848	0.533807	0.510322	Eukaryota	Dr_Blastula;Dr_Involuting marginal zone;Dr_Neuroectoderm;Dr_Non-neural ectoderm	Xt_Blastula;Xt_Involuting marginal zone;Xt_Neuroectoderm;Xt_Non-neural ectoderm	FALSE
Dr_LOC570015;Xt_znf329	Dr_LOC570015;Xt_sp3	0	0.510005	0.510005	Eukaryota	Dr_Involuting marginal zone;Dr_Neuroectoderm;Dr_Non-neural ectoderm	Xt_Involuting marginal zone;Xt_Neuroectoderm;Xt_Non-neural ectoderm	FALSE
Dr_LOC570015;Xt_Xetrov90015421m	Dr_LOC570015;Xt_sp3	0	0.510005	0.510005	Eukaryota	Dr_Involuting marginal zone;Dr_Neuroectoderm;Dr_Non-neural ectoderm	Xt_Involuting marginal zone;Xt_Neuroectoderm;Xt_Non-neural ectoderm	FALSE
Dr_LOC570015;Xt_LOC100497179-like	Dr_LOC570015;Xt_sp3	0	0.510005	0.510005	Eukaryota	Dr_Involuting marginal zone;Dr_Neuroectoderm;Dr_Non-neural ectoderm	Xt_Involuting marginal zone;Xt_Neuroectoderm;Xt_Non-neural ectoderm	FALSE
Dr_LOC570015;Xt_znf383	Dr_LOC570015;Xt_sp3	0	0.510005	0.510005	Eukaryota	Dr_Involuting marginal zone;Dr_Neuroectoderm;Dr_Non-neural ectoderm	Xt_Involuting marginal zone;Xt_Neuroectoderm;Xt_Non-neural ectoderm	FALSE
Dr_LOC570015;Xt_Xetrov90015419m	Dr_LOC570015;Xt_sp3	0	0.510005	0.510005	Eukaryota	Dr_Involuting marginal zone;Dr_Neuroectoderm;Dr_Non-neural ectoderm	Xt_Involuting marginal zone;Xt_Neuroectoderm;Xt_Non-neural ectoderm	FALSE
Dr_LOC570015;Xt_Xetrov90029323m	Dr_LOC570015;Xt_sp3	0	0.510005	0.510005	Eukaryota	Dr_Involuting marginal zone;Dr_Neuroectoderm;Dr_Non-neural ectoderm	Xt_Involuting marginal zone;Xt_Neuroectoderm;Xt_Non-neural ectoderm	FALSE
Dr_LOC570015;Xt_LOC101735121-like	Dr_LOC570015;Xt_sp3	0	0.510005	0.510005	Eukaryota	Dr_Involuting marginal zone;Dr_Neuroectoderm;Dr_Non-neural ectoderm	Xt_Involuting marginal zone;Xt_Neuroectoderm;Xt_Non-neural ectoderm	FALSE
Dr_LOC570015;Xt_LOC100496403-like	Dr_LOC570015;Xt_sp3	0	0.510005	0.510005	Eukaryota	Dr_Involuting marginal zone;Dr_Neuroectoderm;Dr_Non-neural ectoderm	Xt_Involuting marginal zone;Xt_Neuroectoderm;Xt_Non-neural ectoderm	TRUE
Dr_LOC570015;Xt_LOC100495499	Dr_LOC570015;Xt_sp3	0	0.510005	0.510005	Eukaryota	Dr_Involuting marginal zone;Dr_Neuroectoderm;Dr_Non-neural ectoderm	Xt_Involuting marginal zone;Xt_Neuroectoderm;Xt_Non-neural ectoderm	FALSE
Dr_LOC570015;Xt_LOC100496561	Dr_LOC570015;Xt_sp3	0	0.510005	0.510005	Eukaryota	Dr_Involuting marginal zone;Dr_Neuroectoderm;Dr_Non-neural ectoderm	Xt_Involuting marginal zone;Xt_Neuroectoderm;Xt_Non-neural ectoderm	TRUE
Dr_LOC570015;Xt_Xetrov90001667m	Dr_LOC570015;Xt_sp3	0	0.510005	0.510005	Eukaryota	Dr_Involuting marginal zone;Dr_Neuroectoderm;Dr_Non-neural ectoderm	Xt_Involuting marginal zone;Xt_Neuroectoderm;Xt_Non-neural ectoderm	FALSE
Dr_LOC570015;Xt_znf250	Dr_LOC570015;Xt_sp3	0	0.510005	0.510005	Eukaryota	Dr_Involuting marginal zone;Dr_Neuroectoderm;Dr_Non-neural ectoderm	Xt_Involuting marginal zone;Xt_Neuroectoderm;Xt_Non-neural ectoderm	FALSE
Dr_LOC570015;Xt_Xetrov90008367m	Dr_LOC570015;Xt_sp3	0	0.510005	0.510005	Eukaryota	Dr_Involuting marginal zone;Dr_Neuroectoderm;Dr_Non-neural ectoderm	Xt_Involuting marginal zone;Xt_Neuroectoderm;Xt_Non-neural ectoderm	FALSE
Dr_LOC570015;Xt_LOC100493966	Dr_LOC570015;Xt_sp3	0	0.510005	0.510005	Eukaryota	Dr_Involuting marginal zone;Dr_Neuroectoderm;Dr_Non-neural ectoderm	Xt_Involuting marginal zone;Xt_Neuroectoderm;Xt_Non-neural ectoderm	FALSE
Xt_hba-l2;Dr_hbaa1	Xt_hba-l2;Dr_hbbe2	0.145475	0.655404	0.509929	Eukaryota	Dr_Blood	Xt_Blood	FALSE
Dr_hbae3;Xt_hba-l4	Dr_hbae3;Xt_LOC100145107	0.0893917	0.599135	0.509743	Eukaryota	Dr_Blood	Xt_Blood	TRUE
Dr_zgc:174275;Xt_LOC100496403-like	Dr_zgc:174275;Xt_znf281	0.0243658	0.533807	0.509441	Eukaryota	Dr_Blastula;Dr_Involuting marginal zone;Dr_Neuroectoderm;Dr_Non-neural ectoderm	Xt_Blastula;Xt_Involuting marginal zone;Xt_Neuroectoderm;Xt_Non-neural ectoderm	TRUE
Dr_LOC100334599;Xt_hba-l3	Dr_LOC100334599;Xt_LOC101735171	0.115467	0.624512	0.509045	Eukaryota	Dr_Blood	Xt_Blood	TRUE
Dr_LOC100334599;Xt_hba-l3	Dr_LOC100334599;Xt_LOC100145107	0.115467	0.62356	0.508093	Eukaryota	Dr_Blood	Xt_Blood	TRUE
Dr_LOC570015;Xt_LOC101734394	Dr_LOC570015;Xt_sp3	0.00262063	0.510005	0.507385	Eukaryota	Dr_Involuting marginal zone;Dr_Neuroectoderm;Dr_Non-neural ectoderm	Xt_Involuting marginal zone;Xt_Neuroectoderm;Xt_Non-neural ectoderm	FALSE
Xt_znf276;Dr_zgc:158366	Xt_znf276;Dr_znf653	0	0.505833	0.505833	Eukaryota			FALSE
Dr_znf653;Xt_Xetrov90009750m	Dr_znf653;Xt_znf276	0	0.505833	0.505833	Eukaryota			TRUE
Dr_si:zfos-2330d3.1;Xt_LOC100488329	Dr_si:zfos-2330d3.1;Xt_fgl2	0	0.50508	0.50508	Eukaryota			FALSE
Xt_fgl2;Dr_si:ch211-236c15.2	Xt_fgl2;Dr_si:zfos-2330d3.1	0	0.50508	0.50508	Eukaryota			FALSE
Dr_si:zfos-2330d3.1;Xt_LOC100488644	Dr_si:zfos-2330d3.1;Xt_fgl2	0	0.50508	0.50508	Eukaryota			FALSE
Dr_si:zfos-2330d3.1;Xt_LOC101731491	Dr_si:zfos-2330d3.1;Xt_fgl2	0	0.50508	0.50508	Eukaryota			FALSE
Xt_fgl2;Dr_fgl2a	Xt_fgl2;Dr_si:zfos-2330d3.1	0	0.50508	0.50508	Eukaryota			FALSE
Xt_hba4;Dr_si:ch211-5k11.6	Xt_hba4;Dr_hbbe3	0	0.504607	0.504607	Eukaryota			TRUE
Dr_zgc:174624;Xt_LOC101735121-like	Dr_zgc:174624;Xt_znf281	0	0.504249	0.504249	Eukaryota	Dr_Blastula;Dr_Involuting marginal zone;Dr_Neuroectoderm;Dr_Non-neural ectoderm	Xt_Blastula;Xt_Involuting marginal zone;Xt_Neuroectoderm;Xt_Non-neural ectoderm	FALSE
Dr_zgc:174624;Xt_znf329	Dr_zgc:174624;Xt_znf281	0	0.504249	0.504249	Eukaryota	Dr_Blastula;Dr_Involuting marginal zone;Dr_Neuroectoderm;Dr_Non-neural ectoderm	Xt_Blastula;Xt_Involuting marginal zone;Xt_Neuroectoderm;Xt_Non-neural ectoderm	FALSE
Dr_zgc:174624;Xt_LOC100493966	Dr_zgc:174624;Xt_znf281	0	0.504249	0.504249	Eukaryota	Dr_Blastula;Dr_Involuting marginal zone;Dr_Neuroectoderm;Dr_Non-neural ectoderm	Xt_Blastula;Xt_Involuting marginal zone;Xt_Neuroectoderm;Xt_Non-neural ectoderm	FALSE
Xt_znf281;Dr_LOC100005963	Xt_znf281;Dr_zgc:174624	0	0.504249	0.504249	Eukaryota	Dr_Blastula;Dr_Involuting marginal zone;Dr_Neuroectoderm;Dr_Non-neural ectoderm	Xt_Blastula;Xt_Involuting marginal zone;Xt_Neuroectoderm;Xt_Non-neural ectoderm	FALSE
Dr_si:zfos-2330d3.3;Xt_LOC100488329	Dr_si:zfos-2330d3.3;Xt_fgl2	0	0.504044	0.504044	Eukaryota			FALSE
Dr_si:zfos-2330d3.3;Xt_LOC101731491	Dr_si:zfos-2330d3.3;Xt_fgl2	0	0.504044	0.504044	Eukaryota			FALSE
Xt_fgl2;Dr_fgl2a	Xt_fgl2;Dr_si:zfos-2330d3.3	0	0.504044	0.504044	Eukaryota			FALSE
Xt_fgl2;Dr_si:ch211-236c15.2	Xt_fgl2;Dr_si:zfos-2330d3.3	0	0.504044	0.504044	Eukaryota			FALSE
Dr_si:zfos-2330d3.3;Xt_LOC100488644	Dr_si:zfos-2330d3.3;Xt_fgl2	0	0.504044	0.504044	Eukaryota			FALSE
Dr_fkbp7;Xt_fkbp7	Dr_fkbp7;Xt_fkbp10	0.0914633	0.594776	0.503313	Eukaryota	Dr_Epidermal progenitor;Dr_Intermediate mesoderm;Dr_Notochord;Dr_Placodal area;Dr_Presomitic mesoderm	Xt_Endothelial;Xt_Epidermal progenitor;Xt_Intermediate mesoderm;Xt_Notochord;Xt_Presomitic mesoderm;Xt_Skeletal muscle	FALSE
Dr_si:ch211-5k11.2;Xt_hba2	Dr_si:ch211-5k11.2;Xt_hbe1	0.213684	0.716318	0.502634	Eukaryota	Dr_Blood	Xt_Blood	TRUE
Dr_hbae1;Xt_hba-l4	Dr_hbae1;Xt_LOC100145107	0.0831047	0.585398	0.502293	Eukaryota	Dr_Blood	Xt_Blood	TRUE
Xt_ak7;Dr_ak7b	Xt_ak7;Dr_ak8	0.167806	0.669542	0.501735	Eukaryota			FALSE
Dr_gdf3;Xt_gdf3	Dr_gdf3;Xt_bmp7.2	0.106503	0.607541	0.501038	Eukaryota	Dr_Blastula;Dr_Involuting marginal zone;Dr_Neuroectoderm;Dr_Non-neural ectoderm	Xt_Blastula;Xt_Involuting marginal zone;Xt_Neuroectoderm;Xt_Non-neural ectoderm	FALSE
Xt_meox2;Dr_meox2	Xt_meox2;Dr_meox1	0	0.500282	0.500282	Eukaryota	Dr_Presomitic mesoderm	Xt_Presomitic mesoderm	FALSE
Xt_hnrnpa0;Dr_hnrnpa0l	Xt_hnrnpa0;Dr_hnrnpa1a	0	0.499881	0.499881	Eukaryota	Dr_Dorsal organizer;Dr_Involuting marginal zone;Dr_Neuroectoderm;Dr_Non-neural ectoderm;Dr_Tailbud	Xt_Hindbrain;Xt_Involuting marginal zone;Xt_Neuroectoderm;Xt_Non-neural ectoderm;Xt_Spemann organizer;Xt_Tailbud	FALSE
Xt_hnrnpa0;Dr_hnrnpa0b	Xt_hnrnpa0;Dr_hnrnpa1a	0	0.499881	0.499881	Eukaryota	Dr_Dorsal organizer;Dr_Involuting marginal zone;Dr_Neuroectoderm;Dr_Non-neural ectoderm;Dr_Tailbud	Xt_Hindbrain;Xt_Involuting marginal zone;Xt_Neuroectoderm;Xt_Non-neural ectoderm;Xt_Spemann organizer;Xt_Tailbud	FALSE
Dr_hnrnpa1a;Xt_hnrnpa3	Dr_hnrnpa1a;Xt_hnrnpa0	0	0.499881	0.499881	Eukaryota	Dr_Dorsal organizer;Dr_Involuting marginal zone;Dr_Neuroectoderm;Dr_Non-neural ectoderm;Dr_Tailbud	Xt_Hindbrain;Xt_Involuting marginal zone;Xt_Neuroectoderm;Xt_Non-neural ectoderm;Xt_Spemann organizer;Xt_Tailbud	FALSE
Dr_hbae1;Xt_hba-l3	Dr_hbae1;Xt_LOC101735171	0.072172	0.571591	0.49942	Eukaryota	Dr_Blood	Xt_Blood	TRUE
Dr_zgc:113886;Xt_LOC100497179-like	Dr_zgc:113886;Xt_znf518b	0.095128	0.593618	0.498489	Eukaryota	Dr_Blastula	Xt_Blastula	FALSE
Dr_zgc:174624;Xt_Xetrov90001667m	Dr_zgc:174624;Xt_znf281	0.00607913	0.504249	0.49817	Eukaryota	Dr_Blastula;Dr_Involuting marginal zone;Dr_Neuroectoderm;Dr_Non-neural ectoderm	Xt_Blastula;Xt_Involuting marginal zone;Xt_Neuroectoderm;Xt_Non-neural ectoderm	FALSE
Dr_cbx1a;Xt_cbx1	Dr_cbx1a;Xt_cbx3	0.139992	0.63776	0.497767	Eukaryota	Dr_Dorsal organizer;Dr_Endoderm;Dr_Involuting marginal zone;Dr_Neuroectoderm;Dr_Non-neural ectoderm;Dr_Tailbud	Xt_Endoderm;Xt_Hindbrain;Xt_Involuting marginal zone;Xt_Neuroectoderm;Xt_Non-neural ectoderm;Xt_Spemann organizer;Xt_Tailbud	FALSE
Dr_LOC100334599;Xt_hba2	Dr_LOC100334599;Xt_hbe1	0.219352	0.713889	0.494536	Eukaryota	Dr_Blood	Xt_Blood	TRUE
Dr_hoxb9a;Xt_hoxb9	Dr_hoxb9a;Xt_hoxd10	0.0703406	0.564644	0.494304	Eukaryota	Dr_Presomitic mesoderm;Dr_Tailbud	Xt_Presomitic mesoderm;Xt_Tailbud	FALSE
Dr_zgc:113886;Xt_LOC100497179-like	Dr_zgc:113886;Xt_bcl6	0.095128	0.589105	0.493977	Eukaryota	Dr_Blastula	Xt_Blastula	FALSE
Xt_rsph10b-like;Dr_rsph10b	Xt_rsph10b-like;Dr_im:6909388	0.142821	0.636739	0.493918	Eukaryota			FALSE
Xt_hba4;Dr_si:ch211-5k11.6	Xt_hba4;Dr_MGC173646	0	0.493758	0.493758	Eukaryota			TRUE
Dr_zgc:174624;Xt_LOC100496561	Dr_zgc:174624;Xt_znf281	0.0105979	0.504249	0.493651	Eukaryota	Dr_Blastula;Dr_Involuting marginal zone;Dr_Neuroectoderm;Dr_Non-neural ectoderm	Xt_Blastula;Xt_Involuting marginal zone;Xt_Neuroectoderm;Xt_Non-neural ectoderm	TRUE
Xt_dnah1;Dr_dnah1	Xt_dnah1;Dr_dnah12	0	0.492831	0.492831	Eukaryota			FALSE
Xt_dnah1;Dr_LOC103911854	Xt_dnah1;Dr_dnah12	0	0.492831	0.492831	Eukaryota			TRUE
Xt_dnah1;Dr_LOC103911853	Xt_dnah1;Dr_dnah12	0	0.492831	0.492831	Eukaryota			TRUE
Xt_hba1;Dr_si:xx-by187g17.1	Xt_hba1;Dr_hbbe2	0.0781391	0.570562	0.492423	Eukaryota	Dr_Blood	Xt_Blood	FALSE
Xt_znf276;Dr_zgc:158366	Xt_znf276;Dr_LOC100329742	0	0.492286	0.492286	Eukaryota			FALSE
Dr_LOC100329742;Xt_Xetrov90009750m	Dr_LOC100329742;Xt_znf276	0	0.492286	0.492286	Eukaryota			TRUE
Xt_myf6;Dr_myf6	Xt_myf6;Dr_myog	0	0.489231	0.489231	Eukaryota	Dr_Skeletal muscle	Xt_Skeletal muscle	TRUE
Dr_zgc:174624;Xt_LOC101734394	Dr_zgc:174624;Xt_znf281	0.015279	0.504249	0.48897	Eukaryota	Dr_Blastula;Dr_Involuting marginal zone;Dr_Neuroectoderm;Dr_Non-neural ectoderm	Xt_Blastula;Xt_Involuting marginal zone;Xt_Neuroectoderm;Xt_Non-neural ectoderm	FALSE
Dr_hbae1;Xt_hba-l4	Dr_hbae1;Xt_LOC101735171	0.0831047	0.571591	0.488487	Eukaryota	Dr_Blood	Xt_Blood	TRUE
Dr_LOC103910469;Xt_znf383	Dr_LOC103910469;Xt_bcl6	0	0.487935	0.487935	Eukaryota	Dr_Blastula	Xt_Blastula	FALSE
Dr_LOC103910469;Xt_znf329	Dr_LOC103910469;Xt_bcl6	0	0.487935	0.487935	Eukaryota	Dr_Blastula	Xt_Blastula	FALSE
Dr_LOC103910469;Xt_znf250	Dr_LOC103910469;Xt_bcl6	0	0.487935	0.487935	Eukaryota	Dr_Blastula	Xt_Blastula	FALSE
Dr_LOC103910469;Xt_Xetrov90029323m	Dr_LOC103910469;Xt_bcl6	0	0.487935	0.487935	Eukaryota	Dr_Blastula	Xt_Blastula	FALSE
Dr_LOC103910469;Xt_LOC100496561	Dr_LOC103910469;Xt_bcl6	0	0.487935	0.487935	Eukaryota	Dr_Blastula	Xt_Blastula	TRUE
Dr_LOC103910469;Xt_Xetrov90001667m	Dr_LOC103910469;Xt_bcl6	0	0.487935	0.487935	Eukaryota	Dr_Blastula	Xt_Blastula	FALSE
Dr_LOC103910469;Xt_LOC100493966	Dr_LOC103910469;Xt_bcl6	0	0.487935	0.487935	Eukaryota	Dr_Blastula	Xt_Blastula	FALSE
Dr_LOC103910469;Xt_LOC101735121-like	Dr_LOC103910469;Xt_bcl6	0	0.487935	0.487935	Eukaryota	Dr_Blastula	Xt_Blastula	FALSE
Dr_LOC103910469;Xt_LOC101734394	Dr_LOC103910469;Xt_bcl6	0	0.487935	0.487935	Eukaryota	Dr_Blastula	Xt_Blastula	FALSE
Xt_bcl6;Dr_bcl6a	Xt_bcl6;Dr_LOC103910469	0	0.487935	0.487935	Eukaryota	Dr_Blastula	Xt_Blastula	FALSE
Dr_hbae1;Xt_hba2	Dr_hbae1;Xt_LOC100037901	0.125083	0.612721	0.487638	Eukaryota	Dr_Blood	Xt_Blood	TRUE
Dr_hbae3;Xt_hba-l3	Dr_hbae3;Xt_LOC101735171	0.112611	0.600071	0.487459	Eukaryota	Dr_Blood	Xt_Blood	TRUE
Dr_LOC103908654;Xt_LOC100497179-like	Dr_LOC103908654;Xt_ctcf	0.0608449	0.548299	0.487454	Eukaryota	Dr_Blastula;Dr_Involuting marginal zone;Dr_Neuroectoderm;Dr_Non-neural ectoderm	Xt_Blastula;Xt_Involuting marginal zone;Xt_Neuroectoderm;Xt_Non-neural ectoderm	FALSE
Xt_leprel4;Dr_leprel4	Xt_leprel4;Dr_crtap	0	0.48678	0.48678	Eukaryota	Dr_Notochord;Dr_Presomitic mesoderm;Dr_Skeletal muscle	Xt_Notochord;Xt_Skeletal muscle	FALSE
Xt_leprel4;Dr_p3h4	Xt_leprel4;Dr_crtap	0	0.48678	0.48678	Eukaryota	Dr_Notochord;Dr_Presomitic mesoderm;Dr_Skeletal muscle	Xt_Notochord;Xt_Skeletal muscle	FALSE
Xt_hba4;Dr_si:ch211-5k11.6	Xt_hba4;Dr_hbbe1.1	0	0.486727	0.486727	Eukaryota			TRUE
Dr_hbae3;Xt_hba-l3	Dr_hbae3;Xt_LOC100145107	0.112611	0.599135	0.486523	Eukaryota	Dr_Blood	Xt_Blood	TRUE
Dr_eya1;Xt_eya1	Dr_eya1;Xt_eya2	0	0.486311	0.486311	Eukaryota	Dr_Intermediate mesoderm;Dr_Otic placode;Dr_Placodal area;Dr_Skeletal muscle	Xt_Endothelial;Xt_Otic placode;Xt_Placodal area;Xt_Skeletal muscle	FALSE
Dr_rap1aa;Xt_rap1b	Dr_rap1aa;Xt_rhebl1	0.0203458	0.506274	0.485928	Eukaryota	Dr_Involuting marginal zone;Dr_Neuroectoderm;Dr_Non-neural ectoderm	Xt_Involuting marginal zone;Xt_Neuroectoderm;Xt_Non-neural ectoderm	FALSE
Dr_cebpa;Xt_cebpa	Dr_cebpa;Xt_cebpd	0	0.485336	0.485336	Eukaryota	Dr_Blood;Dr_Macrophage	Xt_Blood;Xt_Myeloid progenitors	TRUE
Xt_cebpd;Dr_cebpd	Xt_cebpd;Dr_cebpa	0	0.485336	0.485336	Eukaryota	Dr_Blood;Dr_Macrophage	Xt_Blood;Xt_Myeloid progenitors	FALSE
Xt_hoxc4;Dr_hoxc4a	Xt_hoxc4;Dr_hoxc6b	0	0.48514	0.48514	Eukaryota	Dr_Intermediate mesoderm;Dr_Presomitic mesoderm;Dr_Tailbud	Xt_Intermediate mesoderm;Xt_Presomitic mesoderm;Xt_Skeletal muscle;Xt_Tailbud	FALSE
Dr_wu:fj11g02;Xt_LOC100488329	Dr_wu:fj11g02;Xt_fgl2	0	0.483107	0.483107	Eukaryota			FALSE
Dr_wu:fj11g02;Xt_LOC100488644	Dr_wu:fj11g02;Xt_fgl2	0	0.483107	0.483107	Eukaryota			FALSE
Xt_fgl2;Dr_si:ch211-236c15.2	Xt_fgl2;Dr_wu:fj11g02	0	0.483107	0.483107	Eukaryota			FALSE
Dr_wu:fj11g02;Xt_LOC101731491	Dr_wu:fj11g02;Xt_fgl2	0	0.483107	0.483107	Eukaryota			FALSE
Xt_fgl2;Dr_fgl2a	Xt_fgl2;Dr_wu:fj11g02	0	0.483107	0.483107	Eukaryota			FALSE
Dr_zgc:174624;Xt_LOC100496403-like	Dr_zgc:174624;Xt_znf281	0.0211449	0.504249	0.483104	Eukaryota	Dr_Blastula;Dr_Involuting marginal zone;Dr_Neuroectoderm;Dr_Non-neural ectoderm	Xt_Blastula;Xt_Involuting marginal zone;Xt_Neuroectoderm;Xt_Non-neural ectoderm	TRUE
Dr_rap1aa;Xt_rap1a	Dr_rap1aa;Xt_rhebl1	0.0236008	0.506274	0.482673	Eukaryota	Dr_Involuting marginal zone;Dr_Neuroectoderm;Dr_Non-neural ectoderm	Xt_Involuting marginal zone;Xt_Neuroectoderm;Xt_Non-neural ectoderm	FALSE
Xt_tnni2;Dr_tnni2a.1	Xt_tnni2;Dr_tnni2b.2	0	0.482438	0.482438	Eukaryota			FALSE
Xt_hoxc4;Dr_hoxc4a	Xt_hoxc4;Dr_hoxc3a	0	0.480748	0.480748	Eukaryota	Dr_Intermediate mesoderm;Dr_Presomitic mesoderm;Dr_Skeletal muscle;Dr_Tailbud	Xt_Intermediate mesoderm;Xt_Presomitic mesoderm;Xt_Skeletal muscle;Xt_Tailbud	FALSE
Dr_plp1a;Xt_plp1	Dr_plp1a;Xt_gpm6b-like	0	0.476446	0.476446	Eukaryota	Dr_Forebrain/midbrain;Dr_Hindbrain;Dr_Neuron	Xt_Eye primordium;Xt_Forebrain/midbrain;Xt_Hindbrain;Xt_Neuron	FALSE
Xt_gpm6b-like;Dr_gpm6bb	Xt_gpm6b-like;Dr_plp1a	0	0.476446	0.476446	Eukaryota	Dr_Forebrain/midbrain;Dr_Hindbrain;Dr_Neuron	Xt_Eye primordium;Xt_Forebrain/midbrain;Xt_Hindbrain;Xt_Neuron	FALSE
Xt_gpm6b-like;Dr_gpm6ba	Xt_gpm6b-like;Dr_plp1a	0	0.476446	0.476446	Eukaryota	Dr_Forebrain/midbrain;Dr_Hindbrain;Dr_Neuron	Xt_Eye primordium;Xt_Forebrain/midbrain;Xt_Hindbrain;Xt_Neuron	FALSE
Xt_anxa2;Dr_LOC100006250	Xt_anxa2;Dr_anxa11b	0.211087	0.68745	0.476363	Eukaryota	Dr_Endoderm;Dr_Epidermal progenitor;Dr_Ionocyte;Dr_Lens;Dr_Otic placode;Dr_Placodal area;Dr_Rare epidermal subtypes;Dr_Secretory epidermal	Xt_Cement gland primordium;Xt_Epidermal progenitor;Xt_Goblet cell;Xt_Hatching gland;Xt_Ionocyte;Xt_Lens;Xt_Otic placode;Xt_Placodal area;Xt_Small secretory cells	FALSE
Dr_zgc:163073;Xt_myl3	Dr_zgc:163073;Xt_myl1	0	0.475841	0.475841	Eukaryota			FALSE
Xt_gata4;Dr_gata4	Xt_gata4;Dr_gata6	0	0.475699	0.475699	Eukaryota	Dr_Dorsal organizer;Dr_Endoderm;Dr_Involuting marginal zone	Xt_Endoderm;Xt_Involuting marginal zone;Xt_Spemann organizer	TRUE
Dr_gata6;Xt_gata6	Dr_gata6;Xt_gata4	0	0.475699	0.475699	Eukaryota	Dr_Dorsal organizer;Dr_Endoderm;Dr_Involuting marginal zone	Xt_Endoderm;Xt_Involuting marginal zone;Xt_Spemann organizer	FALSE
Dr_nanos3;Xt_LOC101733512-like	Dr_nanos3;Xt_nanos1	0	0.474394	0.474394	Eukaryota			FALSE
Xt_col6a1;Dr_col6a1	Xt_col6a1;Dr_col7a1l	0	0.47436	0.47436	Eukaryota	Dr_Epidermal progenitor	Xt_Epidermal progenitor	FALSE
Xt_hba3;Dr_si:xx-by187g17.1	Xt_hba3;Dr_zgc:163057	0.423908	0.898187	0.474279	Eukaryota	Dr_Blood	Xt_Blood	FALSE
Xt_LOC100486063;Dr_LOC100535278	Xt_LOC100486063;Dr_col7a1l	0	0.474152	0.474152	Eukaryota	Dr_Epidermal progenitor	Xt_Epidermal progenitor	FALSE
Xt_LOC100486063;Dr_col6a6	Xt_LOC100486063;Dr_col7a1l	0	0.474152	0.474152	Eukaryota	Dr_Epidermal progenitor	Xt_Epidermal progenitor	FALSE
Dr_hbae3;Xt_hba2	Dr_hbae3;Xt_hbe1	0.213042	0.686507	0.473464	Eukaryota	Dr_Blood	Xt_Blood	TRUE
Xt_myh2;Dr_myhb	Xt_myh2;Dr_ns:zf-e68	0	0.47333	0.47333	Eukaryota	Dr_Skeletal muscle	Xt_Skeletal muscle	FALSE
Xt_myh2;Dr_wu:fd14a01	Xt_myh2;Dr_ns:zf-e68	0	0.47333	0.47333	Eukaryota	Dr_Skeletal muscle	Xt_Skeletal muscle	FALSE
Xt_myh2;Dr_zgc:66156	Xt_myh2;Dr_ns:zf-e68	0	0.47333	0.47333	Eukaryota	Dr_Skeletal muscle	Xt_Skeletal muscle	TRUE
Xt_myh2;Dr_LOC100537594	Xt_myh2;Dr_ns:zf-e68	0	0.47333	0.47333	Eukaryota	Dr_Skeletal muscle	Xt_Skeletal muscle	FALSE
Xt_etv1;Dr_etv1	Xt_etv1;Dr_etv4	0	0.472336	0.472336	Eukaryota	Dr_Endoderm;Dr_Involuting marginal zone;Dr_Neuroectoderm;Dr_Otic placode;Dr_Presomitic mesoderm;Dr_Tailbud	Xt_Endoderm;Xt_Involuting marginal zone;Xt_Neuroectoderm;Xt_Otic placode;Xt_Presomitic mesoderm;Xt_Tailbud	FALSE
Dr_LOC103910469;Xt_LOC100496403-like	Dr_LOC103910469;Xt_bcl6	0.0164114	0.487935	0.471524	Eukaryota	Dr_Blastula	Xt_Blastula	TRUE
Dr_tbx15;Xt_tbx15	Dr_tbx15;Xt_tbx1	0	0.471249	0.471249	Eukaryota	Dr_Intermediate mesoderm	Xt_Endothelial;Xt_Intermediate mesoderm;Xt_Spemann organizer	TRUE
Xt_yy1;Dr_yy1a	Xt_yy1;Dr_zic2b	0.151543	0.621946	0.470403	Eukaryota	Dr_Dorsal organizer;Dr_Involuting marginal zone;Dr_Neuroectoderm;Dr_Non-neural ectoderm	Xt_Involuting marginal zone;Xt_Neuroectoderm;Xt_Non-neural ectoderm;Xt_Spemann organizer	FALSE
Xt_chrng;Dr_chrne	Xt_chrng;Dr_chrnd	0.263603	0.733555	0.469951	Eukaryota	Dr_Skeletal muscle	Xt_Skeletal muscle	FALSE
Xt_rundc3a;Dr_LOC100148117	Xt_rundc3a;Dr_rufy3	0	0.467723	0.467723	Eukaryota	Dr_Neuron;Dr_Rohon-beard neuron	Xt_Neuron;Xt_Rohon-beard neuron	FALSE
Xt_zbtb10;Dr_zbtb10	Xt_zbtb10;Dr_LOC797788	0.0152839	0.482907	0.467623	Eukaryota			FALSE
Dr_etv4;Xt_etv4	Dr_etv4;Xt_etv1	0.00492824	0.472336	0.467408	Eukaryota	Dr_Endoderm;Dr_Involuting marginal zone;Dr_Neuroectoderm;Dr_Otic placode;Dr_Presomitic mesoderm;Dr_Tailbud	Xt_Endoderm;Xt_Involuting marginal zone;Xt_Neuroectoderm;Xt_Otic placode;Xt_Presomitic mesoderm;Xt_Tailbud	TRUE
Xt_hba4;Dr_si:ch211-5k11.6	Xt_hba4;Dr_hbbe2	0	0.467165	0.467165	Eukaryota			TRUE
Xt_hoxa11;Dr_hoxa11b	Xt_hoxa11;Dr_hoxd12a	0	0.46683	0.46683	Eukaryota	Dr_Presomitic mesoderm	Xt_Presomitic mesoderm	FALSE
Xt_klhl30;Dr_klhl30	Xt_klhl30;Dr_klhl31	0	0.464482	0.464482	Eukaryota	Dr_Skeletal muscle	Xt_Skeletal muscle	FALSE
Dr_LOC100149066;Xt_hes8	Dr_LOC100149066;Xt_hes6.2	0	0.46321	0.46321	Eukaryota	Dr_Forebrain/midbrain	Xt_Forebrain/midbrain	FALSE
Xt_hes6.2;Dr_her8.2	Xt_hes6.2;Dr_LOC100149066	0	0.46321	0.46321	Eukaryota	Dr_Forebrain/midbrain	Xt_Forebrain/midbrain	FALSE
Dr_LOC103908654;Xt_Xetrov90015419m	Dr_LOC103908654;Xt_ctcf	0.0864905	0.548299	0.461809	Eukaryota	Dr_Blastula;Dr_Involuting marginal zone;Dr_Neuroectoderm;Dr_Non-neural ectoderm	Xt_Blastula;Xt_Involuting marginal zone;Xt_Neuroectoderm;Xt_Non-neural ectoderm	FALSE
Xt_hnrnpa0;Dr_hnrnpa0b	Xt_hnrnpa0;Dr_hnrpdl	0	0.460729	0.460729	Eukaryota			FALSE
Xt_hnrnpa0;Dr_hnrnpa0l	Xt_hnrnpa0;Dr_hnrpdl	0	0.460729	0.460729	Eukaryota			FALSE
Dr_capn2b;Xt_LOC101733523	Dr_capn2b;Xt_capn13	0	0.460599	0.460599	Eukaryota	Dr_Epidermal progenitor;Dr_Hatching gland;Dr_Ionocyte;Dr_Rare epidermal subtypes;Dr_Secretory epidermal	Xt_Cement gland primordium;Xt_Epidermal progenitor;Xt_Goblet cell;Xt_Hatching gland;Xt_Ionocyte;Xt_Small secretory cells	TRUE
Dr_hbae1;Xt_hba2	Dr_hbae1;Xt_LOC100145107	0.125083	0.585398	0.460314	Eukaryota	Dr_Blood	Xt_Blood	TRUE
Dr_tagln2;Xt_tagln	Dr_tagln2;Xt_tagln2	0	0.459922	0.459922	Eukaryota	Dr_Endoderm;Dr_Endothelial;Dr_Epidermal progenitor;Dr_Hatching gland;Dr_Ionocyte;Dr_Notoplate;Dr_Placodal area;Dr_Rare epidermal subtypes	Xt_Endothelial;Xt_Epidermal progenitor;Xt_Hatching gland;Xt_Ionocyte;Xt_Notoplate;Xt_Placodal area;Xt_Small secretory cells	FALSE
Dr_cetn2;Xt_cetn1	Dr_cetn2;Xt_LOC100493285	0	0.459904	0.459904	Eukaryota			FALSE
Xt_dnah1;Dr_LOC103911852	Xt_dnah1;Dr_si:dkeyp-87a6.1	0.104767	0.564583	0.459815	Eukaryota			FALSE
Dr_LOC103908654;Xt_LOC100495499	Dr_LOC103908654;Xt_ctcf	0.088723	0.548299	0.459576	Eukaryota	Dr_Blastula;Dr_Involuting marginal zone;Dr_Neuroectoderm;Dr_Non-neural ectoderm	Xt_Blastula;Xt_Involuting marginal zone;Xt_Neuroectoderm;Xt_Non-neural ectoderm	FALSE
Dr_foxh1;Xt_foxh1	Dr_foxh1;Xt_foxi4.2	0.131915	0.591096	0.459182	Eukaryota	Dr_Neuroectoderm;Dr_Non-neural ectoderm	Xt_Neuroectoderm;Xt_Non-neural ectoderm	FALSE
Dr_dpysl5a;Xt_dpysl5	Dr_dpysl5a;Xt_dpysl4	0	0.458092	0.458092	Eukaryota	Dr_Forebrain/midbrain;Dr_Hindbrain;Dr_Neuron;Dr_Rohon-beard neuron	Xt_Eye primordium;Xt_Forebrain/midbrain;Xt_Hindbrain;Xt_Neuron;Xt_Rohon-beard neuron	FALSE
Xt_dpysl4;Dr_dpysl4	Xt_dpysl4;Dr_dpysl5a	0	0.458092	0.458092	Eukaryota	Dr_Forebrain/midbrain;Dr_Hindbrain;Dr_Neuron;Dr_Rohon-beard neuron	Xt_Eye primordium;Xt_Forebrain/midbrain;Xt_Hindbrain;Xt_Neuron;Xt_Rohon-beard neuron	FALSE
Dr_zgc:174702;Xt_znf250	Dr_zgc:174702;Xt_ctcf	0	0.458005	0.458005	Eukaryota			FALSE
Dr_zgc:174702;Xt_Xetrov90029323m	Dr_zgc:174702;Xt_ctcf	0	0.458005	0.458005	Eukaryota			FALSE
Dr_zgc:174702;Xt_znf383	Dr_zgc:174702;Xt_ctcf	0	0.458005	0.458005	Eukaryota			FALSE
Dr_zgc:174702;Xt_Xetrov90015421m	Dr_zgc:174702;Xt_ctcf	0	0.458005	0.458005	Eukaryota			FALSE
Dr_zgc:174702;Xt_Xetrov90015419m	Dr_zgc:174702;Xt_ctcf	0	0.458005	0.458005	Eukaryota			FALSE
Dr_zgc:174702;Xt_Xetrov90008367m	Dr_zgc:174702;Xt_ctcf	0	0.458005	0.458005	Eukaryota			FALSE
Dr_zgc:174702;Xt_LOC100493966	Dr_zgc:174702;Xt_ctcf	0	0.458005	0.458005	Eukaryota			FALSE
Dr_zgc:174702;Xt_znf329	Dr_zgc:174702;Xt_ctcf	0	0.458005	0.458005	Eukaryota			FALSE
Dr_zgc:174702;Xt_LOC101735121-like	Dr_zgc:174702;Xt_ctcf	0	0.458005	0.458005	Eukaryota			FALSE
Dr_zgc:174702;Xt_LOC101734394	Dr_zgc:174702;Xt_ctcf	0	0.458005	0.458005	Eukaryota			FALSE
Dr_zgc:174702;Xt_LOC100497179-like	Dr_zgc:174702;Xt_ctcf	0	0.458005	0.458005	Eukaryota			FALSE
Dr_zgc:174702;Xt_LOC100496561	Dr_zgc:174702;Xt_ctcf	0	0.458005	0.458005	Eukaryota			TRUE
Dr_zgc:174702;Xt_LOC100496403-like	Dr_zgc:174702;Xt_ctcf	0	0.458005	0.458005	Eukaryota			TRUE
Dr_zgc:174702;Xt_LOC100495499	Dr_zgc:174702;Xt_ctcf	0	0.458005	0.458005	Eukaryota			FALSE
Dr_zgc:174702;Xt_Xetrov90001667m	Dr_zgc:174702;Xt_ctcf	0	0.458005	0.458005	Eukaryota			FALSE
Xt_anxa2;Dr_LOC100006250	Xt_anxa2;Dr_LOC103908630	0.211087	0.66881	0.457722	Eukaryota	Dr_Endoderm;Dr_Epidermal progenitor;Dr_Ionocyte;Dr_Lens;Dr_Otic placode;Dr_Placodal area;Dr_Rare epidermal subtypes;Dr_Secretory epidermal	Xt_Cement gland primordium;Xt_Epidermal progenitor;Xt_Goblet cell;Xt_Hatching gland;Xt_Ionocyte;Xt_Lens;Xt_Otic placode;Xt_Placodal area;Xt_Small secretory cells	FALSE
Xt_hbz;Dr_si:xx-by187g17.1	Xt_hbz;Dr_hbbe3	0.353392	0.810858	0.457466	Eukaryota	Dr_Blood	Xt_Blood	FALSE
Xt_hba1;Dr_hbaa1	Xt_hba1;Dr_zgc:163057	0	0.455607	0.455607	Eukaryota	Dr_Blood	Xt_Blood	FALSE
Xt_hba1;Dr_si:ch211-5k11.6	Xt_hba1;Dr_zgc:163057	0	0.455607	0.455607	Eukaryota	Dr_Blood	Xt_Blood	TRUE
Dr_hoxd13a;Xt_hoxd13	Dr_hoxd13a;Xt_hoxd10	0	0.455528	0.455528	Eukaryota	Dr_Presomitic mesoderm	Xt_Presomitic mesoderm;Xt_Tailbud	TRUE
Xt_cetn3;Dr_cetn3	Xt_cetn3;Dr_cetn2	0.0810077	0.536507	0.455499	Eukaryota			FALSE
Dr_LOC103910469;Xt_Xetrov90008367m	Dr_LOC103910469;Xt_bcl6	0.0329031	0.487935	0.455032	Eukaryota	Dr_Blastula	Xt_Blastula	FALSE
Xt_hmgb3;Dr_hmgb3a	Xt_hmgb3;Dr_ubtf	0.103835	0.558048	0.454214	Eukaryota	Dr_Dorsal organizer;Dr_Involuting marginal zone;Dr_Neuroectoderm;Dr_Non-neural ectoderm;Dr_Presomitic mesoderm;Dr_Tailbud	Xt_Hindbrain;Xt_Involuting marginal zone;Xt_Neuroectoderm;Xt_Non-neural ectoderm;Xt_Spemann organizer;Xt_Tailbud	FALSE
Xt_tnni1.2;Dr_zgc:112242	Xt_tnni1.2;Dr_tnni2a.4	0	0.454184	0.454184	Eukaryota			FALSE
Dr_tox;Xt_tox	Dr_tox;Xt_tox2	0.0906675	0.544291	0.453624	Eukaryota	Dr_Eye primordium;Dr_Forebrain/midbrain;Dr_Hindbrain;Dr_Neuron;Dr_Optic;Dr_Tailbud	Xt_Eye primordium;Xt_Forebrain/midbrain;Xt_Hindbrain;Xt_Neuron;Xt_Optic	FALSE
Dr_col7a1l;Xt_Xetrov90008423m	Dr_col7a1l;Xt_col6a1	0.0210717	0.47436	0.453288	Eukaryota	Dr_Epidermal progenitor	Xt_Epidermal progenitor	FALSE
Dr_fmoda;Xt_fmod	Dr_fmoda;Xt_bgn	0	0.453098	0.453098	Eukaryota	Dr_Intermediate mesoderm	Xt_Endothelial;Xt_Intermediate mesoderm	FALSE
Xt_bgn;Dr_bgnb	Xt_bgn;Dr_fmoda	0	0.453098	0.453098	Eukaryota	Dr_Intermediate mesoderm	Xt_Endothelial;Xt_Intermediate mesoderm	FALSE
Xt_bgn;Dr_bgna	Xt_bgn;Dr_fmoda	0	0.453098	0.453098	Eukaryota	Dr_Intermediate mesoderm	Xt_Endothelial;Xt_Intermediate mesoderm	FALSE
Dr_col7a1l;Xt_Xetrov90008423m	Dr_col7a1l;Xt_LOC100486063	0.0210717	0.474152	0.45308	Eukaryota	Dr_Epidermal progenitor	Xt_Epidermal progenitor	FALSE
Dr_znf1137;Xt_znf383	Dr_znf1137;Xt_znf281	0.0917356	0.544638	0.452902	Eukaryota	Dr_Blastula;Dr_Involuting marginal zone;Dr_Neuroectoderm;Dr_Non-neural ectoderm	Xt_Blastula;Xt_Involuting marginal zone;Xt_Neuroectoderm;Xt_Non-neural ectoderm	FALSE
Dr_zgc:113886;Xt_Xetrov90015419m	Dr_zgc:113886;Xt_znf518b	0.141539	0.593618	0.452078	Eukaryota	Dr_Blastula	Xt_Blastula	FALSE
Xt_znf281;Dr_LOC100005963	Xt_znf281;Dr_si:ch211-198a12.6	0	0.451679	0.451679	Eukaryota	Dr_Involuting marginal zone;Dr_Neuroectoderm;Dr_Non-neural ectoderm	Xt_Involuting marginal zone;Xt_Neuroectoderm;Xt_Non-neural ectoderm	FALSE
Dr_si:ch211-241b2.1;Xt_LOC100496561	Dr_si:ch211-241b2.1;Xt_zbtb10	0	0.450998	0.450998	Eukaryota			TRUE
Dr_si:ch211-241b2.1;Xt_znf383	Dr_si:ch211-241b2.1;Xt_zbtb10	0	0.450998	0.450998	Eukaryota			FALSE
Dr_si:ch211-241b2.1;Xt_LOC100496403-like	Dr_si:ch211-241b2.1;Xt_zbtb10	0	0.450998	0.450998	Eukaryota			TRUE
Dr_si:ch211-241b2.1;Xt_znf329	Dr_si:ch211-241b2.1;Xt_zbtb10	0	0.450998	0.450998	Eukaryota			FALSE
Dr_si:ch211-241b2.1;Xt_LOC100497179-like	Dr_si:ch211-241b2.1;Xt_zbtb10	0	0.450998	0.450998	Eukaryota			FALSE
Dr_si:ch211-241b2.1;Xt_znf250	Dr_si:ch211-241b2.1;Xt_zbtb10	0	0.450998	0.450998	Eukaryota			FALSE
Dr_si:ch211-241b2.1;Xt_Xetrov90008367m	Dr_si:ch211-241b2.1;Xt_zbtb10	0	0.450998	0.450998	Eukaryota			FALSE
Dr_si:ch211-241b2.1;Xt_Xetrov90029323m	Dr_si:ch211-241b2.1;Xt_zbtb10	0	0.450998	0.450998	Eukaryota			FALSE
Dr_si:ch211-241b2.1;Xt_Xetrov90015421m	Dr_si:ch211-241b2.1;Xt_zbtb10	0	0.450998	0.450998	Eukaryota			FALSE
Dr_si:ch211-241b2.1;Xt_LOC100493966	Dr_si:ch211-241b2.1;Xt_zbtb10	0	0.450998	0.450998	Eukaryota			FALSE
Dr_si:ch211-241b2.1;Xt_Xetrov90015419m	Dr_si:ch211-241b2.1;Xt_zbtb10	0	0.450998	0.450998	Eukaryota			FALSE
Dr_si:ch211-241b2.1;Xt_Xetrov90001667m	Dr_si:ch211-241b2.1;Xt_zbtb10	0	0.450998	0.450998	Eukaryota			FALSE
Dr_si:ch211-241b2.1;Xt_LOC101734394	Dr_si:ch211-241b2.1;Xt_zbtb10	0	0.450998	0.450998	Eukaryota			FALSE
Dr_si:ch211-241b2.1;Xt_LOC101735121-like	Dr_si:ch211-241b2.1;Xt_zbtb10	0	0.450998	0.450998	Eukaryota			FALSE
Dr_si:ch211-241b2.1;Xt_LOC100495499	Dr_si:ch211-241b2.1;Xt_zbtb10	0	0.450998	0.450998	Eukaryota			FALSE
Dr_cbx5;Xt_cbx5-like	Dr_cbx5;Xt_cbx3	0.107567	0.558002	0.450434	Eukaryota			FALSE
Xt_hbz;Dr_si:xx-by187g17.1	Xt_hbz;Dr_MGC173646	0.353392	0.803561	0.450169	Eukaryota	Dr_Blood	Xt_Blood	FALSE
Dr_hoxa13b;Xt_hoxa13	Dr_hoxa13b;Xt_hoxd10	0	0.449483	0.449483	Eukaryota			FALSE
Xt_myh4;Dr_LOC100537594	Xt_myh4;Dr_myhz1.1	0	0.44902	0.44902	Eukaryota			FALSE
Xt_myh4;Dr_myhb	Xt_myh4;Dr_myhz1.1	0	0.44902	0.44902	Eukaryota			FALSE
Xt_myh4;Dr_wu:fd14a01	Xt_myh4;Dr_myhz1.1	0	0.44902	0.44902	Eukaryota			FALSE
Xt_myh4;Dr_zgc:66156	Xt_myh4;Dr_myhz1.1	0	0.44902	0.44902	Eukaryota			TRUE
Dr_LOC570015;Xt_Xetrov90029323m	Dr_LOC570015;Xt_vezf1	0	0.44885	0.44885	Eukaryota	Dr_Dorsal organizer;Dr_Involuting marginal zone;Dr_Neuroectoderm;Dr_Non-neural ectoderm;Dr_Notochord;Dr_Tailbud	Xt_Involuting marginal zone;Xt_Neuroectoderm;Xt_Non-neural ectoderm;Xt_Spemann organizer;Xt_Tailbud	FALSE
Dr_LOC570015;Xt_LOC100497179-like	Dr_LOC570015;Xt_vezf1	0	0.44885	0.44885	Eukaryota	Dr_Dorsal organizer;Dr_Involuting marginal zone;Dr_Neuroectoderm;Dr_Non-neural ectoderm;Dr_Notochord;Dr_Tailbud	Xt_Involuting marginal zone;Xt_Neuroectoderm;Xt_Non-neural ectoderm;Xt_Spemann organizer;Xt_Tailbud	FALSE
Dr_LOC570015;Xt_znf329	Dr_LOC570015;Xt_vezf1	0	0.44885	0.44885	Eukaryota	Dr_Dorsal organizer;Dr_Involuting marginal zone;Dr_Neuroectoderm;Dr_Non-neural ectoderm;Dr_Notochord;Dr_Tailbud	Xt_Involuting marginal zone;Xt_Neuroectoderm;Xt_Non-neural ectoderm;Xt_Spemann organizer;Xt_Tailbud	FALSE
Dr_LOC570015;Xt_znf250	Dr_LOC570015;Xt_vezf1	0	0.44885	0.44885	Eukaryota	Dr_Dorsal organizer;Dr_Involuting marginal zone;Dr_Neuroectoderm;Dr_Non-neural ectoderm;Dr_Notochord;Dr_Tailbud	Xt_Involuting marginal zone;Xt_Neuroectoderm;Xt_Non-neural ectoderm;Xt_Spemann organizer;Xt_Tailbud	FALSE
Dr_LOC570015;Xt_Xetrov90001667m	Dr_LOC570015;Xt_vezf1	0	0.44885	0.44885	Eukaryota	Dr_Dorsal organizer;Dr_Involuting marginal zone;Dr_Neuroectoderm;Dr_Non-neural ectoderm;Dr_Notochord;Dr_Tailbud	Xt_Involuting marginal zone;Xt_Neuroectoderm;Xt_Non-neural ectoderm;Xt_Spemann organizer;Xt_Tailbud	FALSE
Dr_LOC570015;Xt_LOC100496561	Dr_LOC570015;Xt_vezf1	0	0.44885	0.44885	Eukaryota	Dr_Dorsal organizer;Dr_Involuting marginal zone;Dr_Neuroectoderm;Dr_Non-neural ectoderm;Dr_Notochord;Dr_Tailbud	Xt_Involuting marginal zone;Xt_Neuroectoderm;Xt_Non-neural ectoderm;Xt_Spemann organizer;Xt_Tailbud	TRUE
Dr_LOC570015;Xt_znf383	Dr_LOC570015;Xt_vezf1	0	0.44885	0.44885	Eukaryota	Dr_Dorsal organizer;Dr_Involuting marginal zone;Dr_Neuroectoderm;Dr_Non-neural ectoderm;Dr_Notochord;Dr_Tailbud	Xt_Involuting marginal zone;Xt_Neuroectoderm;Xt_Non-neural ectoderm;Xt_Spemann organizer;Xt_Tailbud	FALSE
Dr_LOC570015;Xt_LOC100496403-like	Dr_LOC570015;Xt_vezf1	0	0.44885	0.44885	Eukaryota	Dr_Dorsal organizer;Dr_Involuting marginal zone;Dr_Neuroectoderm;Dr_Non-neural ectoderm;Dr_Notochord;Dr_Tailbud	Xt_Involuting marginal zone;Xt_Neuroectoderm;Xt_Non-neural ectoderm;Xt_Spemann organizer;Xt_Tailbud	TRUE
Dr_LOC570015;Xt_Xetrov90008367m	Dr_LOC570015;Xt_vezf1	0	0.44885	0.44885	Eukaryota	Dr_Dorsal organizer;Dr_Involuting marginal zone;Dr_Neuroectoderm;Dr_Non-neural ectoderm;Dr_Notochord;Dr_Tailbud	Xt_Involuting marginal zone;Xt_Neuroectoderm;Xt_Non-neural ectoderm;Xt_Spemann organizer;Xt_Tailbud	FALSE
Dr_LOC570015;Xt_LOC100493966	Dr_LOC570015;Xt_vezf1	0	0.44885	0.44885	Eukaryota	Dr_Dorsal organizer;Dr_Involuting marginal zone;Dr_Neuroectoderm;Dr_Non-neural ectoderm;Dr_Notochord;Dr_Tailbud	Xt_Involuting marginal zone;Xt_Neuroectoderm;Xt_Non-neural ectoderm;Xt_Spemann organizer;Xt_Tailbud	FALSE
Dr_LOC570015;Xt_Xetrov90015419m	Dr_LOC570015;Xt_vezf1	0	0.44885	0.44885	Eukaryota	Dr_Dorsal organizer;Dr_Involuting marginal zone;Dr_Neuroectoderm;Dr_Non-neural ectoderm;Dr_Notochord;Dr_Tailbud	Xt_Involuting marginal zone;Xt_Neuroectoderm;Xt_Non-neural ectoderm;Xt_Spemann organizer;Xt_Tailbud	FALSE
Dr_LOC570015;Xt_LOC100495499	Dr_LOC570015;Xt_vezf1	0	0.44885	0.44885	Eukaryota	Dr_Dorsal organizer;Dr_Involuting marginal zone;Dr_Neuroectoderm;Dr_Non-neural ectoderm;Dr_Notochord;Dr_Tailbud	Xt_Involuting marginal zone;Xt_Neuroectoderm;Xt_Non-neural ectoderm;Xt_Spemann organizer;Xt_Tailbud	FALSE
Dr_LOC570015;Xt_Xetrov90015421m	Dr_LOC570015;Xt_vezf1	0	0.44885	0.44885	Eukaryota	Dr_Dorsal organizer;Dr_Involuting marginal zone;Dr_Neuroectoderm;Dr_Non-neural ectoderm;Dr_Notochord;Dr_Tailbud	Xt_Involuting marginal zone;Xt_Neuroectoderm;Xt_Non-neural ectoderm;Xt_Spemann organizer;Xt_Tailbud	FALSE
Dr_LOC570015;Xt_LOC101735121-like	Dr_LOC570015;Xt_vezf1	0	0.44885	0.44885	Eukaryota	Dr_Dorsal organizer;Dr_Involuting marginal zone;Dr_Neuroectoderm;Dr_Non-neural ectoderm;Dr_Notochord;Dr_Tailbud	Xt_Involuting marginal zone;Xt_Neuroectoderm;Xt_Non-neural ectoderm;Xt_Spemann organizer;Xt_Tailbud	FALSE
Dr_ccnb3;Xt_ccnb3	Dr_ccnb3;Xt_ccnb1.2	0.178002	0.626045	0.448043	Eukaryota	Dr_Involuting marginal zone;Dr_Neuroectoderm;Dr_Non-neural ectoderm	Xt_Involuting marginal zone;Xt_Neuroectoderm;Xt_Non-neural ectoderm	FALSE
Dr_hoxc9a;Xt_hoxc9	Dr_hoxc9a;Xt_hoxd10	0.145358	0.593134	0.447775	Eukaryota	Dr_Presomitic mesoderm;Dr_Tailbud	Xt_Presomitic mesoderm;Xt_Tailbud	FALSE
Dr_si:ch211-5k11.2;Xt_hba2	Dr_si:ch211-5k11.2;Xt_LOC100216007	0.213684	0.661375	0.447691	Eukaryota	Dr_Blood	Xt_Blood	TRUE
Dr_zgc:113886;Xt_Xetrov90015419m	Dr_zgc:113886;Xt_bcl6	0.141539	0.589105	0.447566	Eukaryota	Dr_Blastula	Xt_Blastula	FALSE
Dr_hbae1;Xt_hba2	Dr_hbae1;Xt_LOC101735171	0.125083	0.571591	0.446508	Eukaryota	Dr_Blood	Xt_Blood	TRUE
Dr_LOC570015;Xt_LOC101734394	Dr_LOC570015;Xt_vezf1	0.00262063	0.44885	0.446229	Eukaryota	Dr_Dorsal organizer;Dr_Involuting marginal zone;Dr_Neuroectoderm;Dr_Non-neural ectoderm;Dr_Notochord;Dr_Tailbud	Xt_Involuting marginal zone;Xt_Neuroectoderm;Xt_Non-neural ectoderm;Xt_Spemann organizer;Xt_Tailbud	FALSE
Xt_hes6.2;Dr_her8.2	Xt_hes6.2;Dr_her4.2	0	0.446027	0.446027	Eukaryota	Dr_Forebrain/midbrain;Dr_Neuron	Xt_Forebrain/midbrain;Xt_Neuron	FALSE
Dr_her4.2;Xt_hes8	Dr_her4.2;Xt_hes6.2	0	0.446027	0.446027	Eukaryota	Dr_Forebrain/midbrain;Dr_Neuron	Xt_Forebrain/midbrain;Xt_Neuron	FALSE
Dr_rpl22l1;Xt_rpl22l1	Dr_rpl22l1;Xt_rpl22	0.332752	0.778778	0.446026	Eukaryota	Dr_Blood;Dr_Endothelial;Dr_Eye primordium;Dr_Forebrain/midbrain;Dr_Hindbrain;Dr_Intermediate mesoderm;Dr_Lens;Dr_Macrophage;Dr_Neural crest;Dr_Optic;Dr_Otic placode;Dr_Placodal area;Dr_Presomitic mesoderm;Dr_Rare epidermal subtypes;Dr_Skeletal muscle	Xt_Blood;Xt_Endothelial;Xt_Eye primordium;Xt_Forebrain/midbrain;Xt_Hindbrain;Xt_Intermediate mesoderm;Xt_Lens;Xt_Myeloid progenitors;Xt_Neural crest;Xt_Optic;Xt_Otic placode;Xt_Placodal area;Xt_Presomitic mesoderm;Xt_Pronephric mesenchyme;Xt_Skeletal muscle;Xt_Small secretory cells	FALSE
Dr_odc1;Xt_LOC100498594	Dr_odc1;Xt_azin1	0.00917722	0.454926	0.445749	Eukaryota	Dr_Dorsal organizer;Dr_Eye primordium;Dr_Neuroectoderm;Dr_Non-neural ectoderm;Dr_Notochord;Dr_Tailbud	Xt_Eye primordium;Xt_Hindbrain;Xt_Neuroectoderm;Xt_Non-neural ectoderm;Xt_Spemann organizer;Xt_Tailbud	TRUE
Dr_zgc:174275;Xt_Xetrov90008367m	Dr_zgc:174275;Xt_znf281	0.0885381	0.533807	0.445269	Eukaryota	Dr_Blastula;Dr_Involuting marginal zone;Dr_Neuroectoderm;Dr_Non-neural ectoderm	Xt_Blastula;Xt_Involuting marginal zone;Xt_Neuroectoderm;Xt_Non-neural ectoderm	FALSE
Dr_zgc:171687;Xt_LOC100488329	Dr_zgc:171687;Xt_fgl2	0	0.445188	0.445188	Eukaryota			FALSE
Xt_fgl2;Dr_si:ch211-236c15.2	Xt_fgl2;Dr_zgc:171687	0	0.445188	0.445188	Eukaryota			FALSE
Dr_zgc:171687;Xt_LOC100488644	Dr_zgc:171687;Xt_fgl2	0	0.445188	0.445188	Eukaryota			FALSE
Dr_zgc:171687;Xt_LOC101731491	Dr_zgc:171687;Xt_fgl2	0	0.445188	0.445188	Eukaryota			FALSE
Xt_fgl2;Dr_fgl2a	Xt_fgl2;Dr_zgc:171687	0	0.445188	0.445188	Eukaryota			FALSE
Dr_zgc:173619;Xt_znf329	Dr_zgc:173619;Xt_sp3	0	0.445146	0.445146	Eukaryota	Dr_Involuting marginal zone;Dr_Neuroectoderm;Dr_Non-neural ectoderm	Xt_Involuting marginal zone;Xt_Neuroectoderm;Xt_Non-neural ectoderm	FALSE
Dr_zgc:173619;Xt_Xetrov90029323m	Dr_zgc:173619;Xt_sp3	0	0.445146	0.445146	Eukaryota	Dr_Involuting marginal zone;Dr_Neuroectoderm;Dr_Non-neural ectoderm	Xt_Involuting marginal zone;Xt_Neuroectoderm;Xt_Non-neural ectoderm	FALSE
Dr_zgc:173619;Xt_Xetrov90015419m	Dr_zgc:173619;Xt_sp3	0	0.445146	0.445146	Eukaryota	Dr_Involuting marginal zone;Dr_Neuroectoderm;Dr_Non-neural ectoderm	Xt_Involuting marginal zone;Xt_Neuroectoderm;Xt_Non-neural ectoderm	FALSE
Dr_zgc:173619;Xt_LOC101735121-like	Dr_zgc:173619;Xt_sp3	0	0.445146	0.445146	Eukaryota	Dr_Involuting marginal zone;Dr_Neuroectoderm;Dr_Non-neural ectoderm	Xt_Involuting marginal zone;Xt_Neuroectoderm;Xt_Non-neural ectoderm	FALSE
Dr_zgc:173619;Xt_Xetrov90008367m	Dr_zgc:173619;Xt_sp3	0	0.445146	0.445146	Eukaryota	Dr_Involuting marginal zone;Dr_Neuroectoderm;Dr_Non-neural ectoderm	Xt_Involuting marginal zone;Xt_Neuroectoderm;Xt_Non-neural ectoderm	FALSE
Dr_zgc:173619;Xt_LOC100496561	Dr_zgc:173619;Xt_sp3	0	0.445146	0.445146	Eukaryota	Dr_Involuting marginal zone;Dr_Neuroectoderm;Dr_Non-neural ectoderm	Xt_Involuting marginal zone;Xt_Neuroectoderm;Xt_Non-neural ectoderm	TRUE
Dr_zgc:173619;Xt_Xetrov90015421m	Dr_zgc:173619;Xt_sp3	0	0.445146	0.445146	Eukaryota	Dr_Involuting marginal zone;Dr_Neuroectoderm;Dr_Non-neural ectoderm	Xt_Involuting marginal zone;Xt_Neuroectoderm;Xt_Non-neural ectoderm	FALSE
Dr_zgc:173619;Xt_LOC100496403-like	Dr_zgc:173619;Xt_sp3	0	0.445146	0.445146	Eukaryota	Dr_Involuting marginal zone;Dr_Neuroectoderm;Dr_Non-neural ectoderm	Xt_Involuting marginal zone;Xt_Neuroectoderm;Xt_Non-neural ectoderm	TRUE
Dr_zgc:173619;Xt_Xetrov90001667m	Dr_zgc:173619;Xt_sp3	0	0.445146	0.445146	Eukaryota	Dr_Involuting marginal zone;Dr_Neuroectoderm;Dr_Non-neural ectoderm	Xt_Involuting marginal zone;Xt_Neuroectoderm;Xt_Non-neural ectoderm	FALSE
Dr_zgc:173619;Xt_znf250	Dr_zgc:173619;Xt_sp3	0	0.445146	0.445146	Eukaryota	Dr_Involuting marginal zone;Dr_Neuroectoderm;Dr_Non-neural ectoderm	Xt_Involuting marginal zone;Xt_Neuroectoderm;Xt_Non-neural ectoderm	FALSE
Dr_zgc:173619;Xt_LOC101734394	Dr_zgc:173619;Xt_sp3	0	0.445146	0.445146	Eukaryota	Dr_Involuting marginal zone;Dr_Neuroectoderm;Dr_Non-neural ectoderm	Xt_Involuting marginal zone;Xt_Neuroectoderm;Xt_Non-neural ectoderm	FALSE
Dr_zgc:173619;Xt_LOC100497179-like	Dr_zgc:173619;Xt_sp3	0	0.445146	0.445146	Eukaryota	Dr_Involuting marginal zone;Dr_Neuroectoderm;Dr_Non-neural ectoderm	Xt_Involuting marginal zone;Xt_Neuroectoderm;Xt_Non-neural ectoderm	FALSE
Dr_zgc:173619;Xt_LOC100493966	Dr_zgc:173619;Xt_sp3	0	0.445146	0.445146	Eukaryota	Dr_Involuting marginal zone;Dr_Neuroectoderm;Dr_Non-neural ectoderm	Xt_Involuting marginal zone;Xt_Neuroectoderm;Xt_Non-neural ectoderm	FALSE
Dr_znf1137;Xt_Xetrov90008367m	Dr_znf1137;Xt_znf281	0.0995665	0.544638	0.445071	Eukaryota	Dr_Blastula;Dr_Involuting marginal zone;Dr_Neuroectoderm;Dr_Non-neural ectoderm	Xt_Blastula;Xt_Involuting marginal zone;Xt_Neuroectoderm;Xt_Non-neural ectoderm	FALSE
Xt_hba-l2;Dr_si:xx-by187g17.1	Xt_hba-l2;Dr_hbbe3	0.25417	0.699084	0.444913	Eukaryota	Dr_Blood	Xt_Blood	FALSE
Dr_si:ch211-5k11.2;Xt_hba2	Dr_si:ch211-5k11.2;Xt_LOC100037901	0.213684	0.658469	0.444786	Eukaryota	Dr_Blood	Xt_Blood	TRUE
Dr_LOC100148329;Xt_hes8	Dr_LOC100148329;Xt_hes6.2	0	0.444714	0.444714	Eukaryota	Dr_Forebrain/midbrain	Xt_Forebrain/midbrain	FALSE
Xt_hes6.2;Dr_her8.2	Xt_hes6.2;Dr_LOC100148329	0	0.444714	0.444714	Eukaryota	Dr_Forebrain/midbrain	Xt_Forebrain/midbrain	FALSE
Dr_zgc:174275;Xt_Xetrov90029323m	Dr_zgc:174275;Xt_znf281	0.0892534	0.533807	0.444553	Eukaryota	Dr_Blastula;Dr_Involuting marginal zone;Dr_Neuroectoderm;Dr_Non-neural ectoderm	Xt_Blastula;Xt_Involuting marginal zone;Xt_Neuroectoderm;Xt_Non-neural ectoderm	FALSE
Xt_hba-l5;Dr_si:xx-by187g17.1	Xt_hba-l5;Dr_MGC173646	0.405273	0.849482	0.444209	Eukaryota	Dr_Blood	Xt_Blood	FALSE
Dr_znf1137;Xt_Xetrov90029323m	Dr_znf1137;Xt_znf281	0.101205	0.544638	0.443433	Eukaryota	Dr_Blastula;Dr_Involuting marginal zone;Dr_Neuroectoderm;Dr_Non-neural ectoderm	Xt_Blastula;Xt_Involuting marginal zone;Xt_Neuroectoderm;Xt_Non-neural ectoderm	FALSE
Xt_Xetrov90012559m;Dr_rbm5	Xt_Xetrov90012559m;Dr_LOC567058	0	0.442621	0.442621	Eukaryota	Dr_Dorsal organizer;Dr_Involuting marginal zone;Dr_Neuroectoderm;Dr_Non-neural ectoderm;Dr_Notochord;Dr_Tailbud	Xt_Involuting marginal zone;Xt_Neuroectoderm;Xt_Non-neural ectoderm;Xt_Spemann organizer;Xt_Tailbud	FALSE
Dr_LOC100334599;Xt_hba2	Dr_LOC100334599;Xt_LOC100216007	0.219352	0.661779	0.442427	Eukaryota	Dr_Blood	Xt_Blood	TRUE
Xt_rnf5;Dr_rnf5	Xt_rnf5;Dr_rnf185	0	0.442384	0.442384	Eukaryota	Dr_Blastula;Dr_Involuting marginal zone;Dr_Neuroectoderm	Xt_Blastula;Xt_Involuting marginal zone;Xt_Neuroectoderm	FALSE
Xt_bcl6;Dr_bcl6a	Xt_bcl6;Dr_LOC103908671	0	0.44169	0.44169	Eukaryota	Dr_Blastula	Xt_Blastula	FALSE
Dr_znf1137;Xt_znf250	Dr_znf1137;Xt_sp1	0	0.441441	0.441441	Eukaryota			FALSE
Dr_znf1137;Xt_znf329	Dr_znf1137;Xt_sp1	0	0.441441	0.441441	Eukaryota			FALSE
Dr_znf1137;Xt_LOC100493966	Dr_znf1137;Xt_sp1	0	0.441441	0.441441	Eukaryota			FALSE
Dr_LOC103909095;Xt_znf250	Dr_LOC103909095;Xt_znf281	0	0.441323	0.441323	Eukaryota	Dr_Blastula;Dr_Dorsal organizer;Dr_Involuting marginal zone;Dr_Neuroectoderm	Xt_Blastula;Xt_Involuting marginal zone;Xt_Neuroectoderm;Xt_Non-neural ectoderm;Xt_Spemann organizer	FALSE
Dr_LOC103909095;Xt_LOC101734394	Dr_LOC103909095;Xt_znf281	0	0.441323	0.441323	Eukaryota	Dr_Blastula;Dr_Dorsal organizer;Dr_Involuting marginal zone;Dr_Neuroectoderm	Xt_Blastula;Xt_Involuting marginal zone;Xt_Neuroectoderm;Xt_Non-neural ectoderm;Xt_Spemann organizer	FALSE
Dr_LOC103909095;Xt_LOC100493966	Dr_LOC103909095;Xt_znf281	0	0.441323	0.441323	Eukaryota	Dr_Blastula;Dr_Dorsal organizer;Dr_Involuting marginal zone;Dr_Neuroectoderm	Xt_Blastula;Xt_Involuting marginal zone;Xt_Neuroectoderm;Xt_Non-neural ectoderm;Xt_Spemann organizer	FALSE
Dr_LOC103909095;Xt_Xetrov90001667m	Dr_LOC103909095;Xt_znf281	0	0.441323	0.441323	Eukaryota	Dr_Blastula;Dr_Dorsal organizer;Dr_Involuting marginal zone;Dr_Neuroectoderm	Xt_Blastula;Xt_Involuting marginal zone;Xt_Neuroectoderm;Xt_Non-neural ectoderm;Xt_Spemann organizer	FALSE
Dr_LOC103909095;Xt_LOC101735121-like	Dr_LOC103909095;Xt_znf281	0	0.441323	0.441323	Eukaryota	Dr_Blastula;Dr_Dorsal organizer;Dr_Involuting marginal zone;Dr_Neuroectoderm	Xt_Blastula;Xt_Involuting marginal zone;Xt_Neuroectoderm;Xt_Non-neural ectoderm;Xt_Spemann organizer	FALSE
Dr_LOC103909095;Xt_znf383	Dr_LOC103909095;Xt_znf281	0	0.441323	0.441323	Eukaryota	Dr_Blastula;Dr_Dorsal organizer;Dr_Involuting marginal zone;Dr_Neuroectoderm	Xt_Blastula;Xt_Involuting marginal zone;Xt_Neuroectoderm;Xt_Non-neural ectoderm;Xt_Spemann organizer	FALSE
Xt_znf281;Dr_LOC100005963	Xt_znf281;Dr_LOC103909095	0	0.441323	0.441323	Eukaryota	Dr_Blastula;Dr_Dorsal organizer;Dr_Involuting marginal zone;Dr_Neuroectoderm	Xt_Blastula;Xt_Involuting marginal zone;Xt_Neuroectoderm;Xt_Non-neural ectoderm;Xt_Spemann organizer	FALSE
Dr_LOC103909095;Xt_LOC100496403-like	Dr_LOC103909095;Xt_znf281	0	0.441323	0.441323	Eukaryota	Dr_Blastula;Dr_Dorsal organizer;Dr_Involuting marginal zone;Dr_Neuroectoderm	Xt_Blastula;Xt_Involuting marginal zone;Xt_Neuroectoderm;Xt_Non-neural ectoderm;Xt_Spemann organizer	TRUE
Dr_LOC103909095;Xt_Xetrov90008367m	Dr_LOC103909095;Xt_znf281	0	0.441323	0.441323	Eukaryota	Dr_Blastula;Dr_Dorsal organizer;Dr_Involuting marginal zone;Dr_Neuroectoderm	Xt_Blastula;Xt_Involuting marginal zone;Xt_Neuroectoderm;Xt_Non-neural ectoderm;Xt_Spemann organizer	FALSE
Dr_LOC103909095;Xt_LOC100495499	Dr_LOC103909095;Xt_znf281	0	0.441323	0.441323	Eukaryota	Dr_Blastula;Dr_Dorsal organizer;Dr_Involuting marginal zone;Dr_Neuroectoderm	Xt_Blastula;Xt_Involuting marginal zone;Xt_Neuroectoderm;Xt_Non-neural ectoderm;Xt_Spemann organizer	FALSE
Dr_LOC103909095;Xt_LOC100497179-like	Dr_LOC103909095;Xt_znf281	0	0.441323	0.441323	Eukaryota	Dr_Blastula;Dr_Dorsal organizer;Dr_Involuting marginal zone;Dr_Neuroectoderm	Xt_Blastula;Xt_Involuting marginal zone;Xt_Neuroectoderm;Xt_Non-neural ectoderm;Xt_Spemann organizer	FALSE
Dr_LOC103909095;Xt_znf329	Dr_LOC103909095;Xt_znf281	0	0.441323	0.441323	Eukaryota	Dr_Blastula;Dr_Dorsal organizer;Dr_Involuting marginal zone;Dr_Neuroectoderm	Xt_Blastula;Xt_Involuting marginal zone;Xt_Neuroectoderm;Xt_Non-neural ectoderm;Xt_Spemann organizer	FALSE
Dr_LOC103909095;Xt_Xetrov90029323m	Dr_LOC103909095;Xt_znf281	0	0.441323	0.441323	Eukaryota	Dr_Blastula;Dr_Dorsal organizer;Dr_Involuting marginal zone;Dr_Neuroectoderm	Xt_Blastula;Xt_Involuting marginal zone;Xt_Neuroectoderm;Xt_Non-neural ectoderm;Xt_Spemann organizer	FALSE
Dr_LOC103909095;Xt_LOC100496561	Dr_LOC103909095;Xt_znf281	0	0.441323	0.441323	Eukaryota	Dr_Blastula;Dr_Dorsal organizer;Dr_Involuting marginal zone;Dr_Neuroectoderm	Xt_Blastula;Xt_Involuting marginal zone;Xt_Neuroectoderm;Xt_Non-neural ectoderm;Xt_Spemann organizer	TRUE
Dr_LOC103909095;Xt_Xetrov90015419m	Dr_LOC103909095;Xt_znf281	0	0.441323	0.441323	Eukaryota	Dr_Blastula;Dr_Dorsal organizer;Dr_Involuting marginal zone;Dr_Neuroectoderm	Xt_Blastula;Xt_Involuting marginal zone;Xt_Neuroectoderm;Xt_Non-neural ectoderm;Xt_Spemann organizer	FALSE
Dr_LOC103909095;Xt_Xetrov90015421m	Dr_LOC103909095;Xt_znf281	0	0.441323	0.441323	Eukaryota	Dr_Blastula;Dr_Dorsal organizer;Dr_Involuting marginal zone;Dr_Neuroectoderm	Xt_Blastula;Xt_Involuting marginal zone;Xt_Neuroectoderm;Xt_Non-neural ectoderm;Xt_Spemann organizer	FALSE
Xt_myh8-like;Dr_LOC100537594	Xt_myh8-like;Dr_myhz1.1	0	0.44098	0.44098	Eukaryota			FALSE
Xt_myh8-like;Dr_wu:fd14a01	Xt_myh8-like;Dr_myhz1.1	0	0.44098	0.44098	Eukaryota			FALSE
Xt_myh8-like;Dr_zgc:66156	Xt_myh8-like;Dr_myhz1.1	0	0.44098	0.44098	Eukaryota			TRUE
Xt_myh8-like;Dr_myhb	Xt_myh8-like;Dr_myhz1.1	0	0.44098	0.44098	Eukaryota			FALSE
Dr_zgc:174275;Xt_znf383	Dr_zgc:174275;Xt_znf281	0.0930339	0.533807	0.440773	Eukaryota	Dr_Blastula;Dr_Involuting marginal zone;Dr_Neuroectoderm;Dr_Non-neural ectoderm	Xt_Blastula;Xt_Involuting marginal zone;Xt_Neuroectoderm;Xt_Non-neural ectoderm	FALSE
Dr_LOC100334599;Xt_hba2	Dr_LOC100334599;Xt_LOC100037901	0.219352	0.659554	0.440202	Eukaryota	Dr_Blood	Xt_Blood	TRUE
Dr_rnf185;Xt_Xetrov90002881m	Dr_rnf185;Xt_rnf5	0.00241528	0.442384	0.439969	Eukaryota	Dr_Blastula;Dr_Involuting marginal zone;Dr_Neuroectoderm	Xt_Blastula;Xt_Involuting marginal zone;Xt_Neuroectoderm	TRUE
Dr_zgc:173619;Xt_LOC100495499	Dr_zgc:173619;Xt_sp3	0.00571592	0.445146	0.43943	Eukaryota	Dr_Involuting marginal zone;Dr_Neuroectoderm;Dr_Non-neural ectoderm	Xt_Involuting marginal zone;Xt_Neuroectoderm;Xt_Non-neural ectoderm	FALSE
Dr_gb:am422109;Xt_znf250	Dr_gb:am422109;Xt_bcl6	0	0.439111	0.439111	Eukaryota	Dr_Blastula	Xt_Blastula	FALSE
Dr_gb:am422109;Xt_LOC100496561	Dr_gb:am422109;Xt_bcl6	0	0.439111	0.439111	Eukaryota	Dr_Blastula	Xt_Blastula	TRUE
Xt_bcl6;Dr_bcl6a	Xt_bcl6;Dr_gb:am422109	0	0.439111	0.439111	Eukaryota	Dr_Blastula	Xt_Blastula	FALSE
Dr_gb:am422109;Xt_LOC100493966	Dr_gb:am422109;Xt_bcl6	0	0.439111	0.439111	Eukaryota	Dr_Blastula	Xt_Blastula	FALSE
Dr_gb:am422109;Xt_Xetrov90001667m	Dr_gb:am422109;Xt_bcl6	0	0.439111	0.439111	Eukaryota	Dr_Blastula	Xt_Blastula	FALSE
Dr_gb:am422109;Xt_LOC101734394	Dr_gb:am422109;Xt_bcl6	0	0.439111	0.439111	Eukaryota	Dr_Blastula	Xt_Blastula	FALSE
Dr_gb:am422109;Xt_LOC101735121-like	Dr_gb:am422109;Xt_bcl6	0	0.439111	0.439111	Eukaryota	Dr_Blastula	Xt_Blastula	FALSE
Dr_gb:am422109;Xt_znf329	Dr_gb:am422109;Xt_bcl6	0	0.439111	0.439111	Eukaryota	Dr_Blastula	Xt_Blastula	FALSE
Xt_sox17b.1;Dr_sox17	Xt_sox17b.1;Dr_sox32	0.0390975	0.478014	0.438917	Eukaryota	Dr_Endoderm	Xt_Endoderm	FALSE
Xt_ventx2.1;Dr_vent	Xt_ventx2.1;Dr_ved	0	0.43855	0.43855	Eukaryota	Dr_Endoderm;Dr_Involuting marginal zone;Dr_Non-neural ectoderm;Dr_Presomitic mesoderm	Xt_Endoderm;Xt_Involuting marginal zone;Xt_Non-neural ectoderm;Xt_Presomitic mesoderm;Xt_Tailbud	TRUE
Xt_hoxa11;Dr_hoxa11b	Xt_hoxa11;Dr_hoxb9a	0	0.438349	0.438349	Eukaryota	Dr_Presomitic mesoderm	Xt_Presomitic mesoderm	FALSE
Xt_hba-l5;Dr_si:xx-by187g17.1	Xt_hba-l5;Dr_si:ch211-5k11.12	0.405273	0.843407	0.438134	Eukaryota	Dr_Blood	Xt_Blood	FALSE
Dr_LOC103910469;Xt_Xetrov90015421m	Dr_LOC103910469;Xt_bcl6	0.0500195	0.487935	0.437916	Eukaryota	Dr_Blastula	Xt_Blastula	FALSE
Dr_hoxd9a;Xt_hoxd9	Dr_hoxd9a;Xt_hoxc10	0	0.437003	0.437003	Eukaryota	Dr_Presomitic mesoderm;Dr_Tailbud	Xt_Presomitic mesoderm;Xt_Skeletal muscle;Xt_Tailbud	TRUE
Xt_hnrnpa2b1;Dr_hnrnpa3	Xt_hnrnpa2b1;Dr_hnrpdl	0	0.436647	0.436647	Eukaryota			FALSE
Xt_hnrnpa2b1;Dr_hnrnpa1b	Xt_hnrnpa2b1;Dr_hnrpdl	0	0.436647	0.436647	Eukaryota			FALSE
Dr_znf1137;Xt_LOC100496561	Dr_znf1137;Xt_sp1	0.00565628	0.441441	0.435784	Eukaryota			TRUE
Xt_zbtb10;Dr_zbtb10	Xt_zbtb10;Dr_si:ch211-241b2.1	0.0152839	0.450998	0.435714	Eukaryota			FALSE
Dr_zgc:174275;Xt_znf329	Dr_zgc:174275;Xt_sp5l	0	0.435584	0.435584	Eukaryota	Dr_Blastula;Dr_Involuting marginal zone;Dr_Neuroectoderm	Xt_Blastula;Xt_Involuting marginal zone;Xt_Neuroectoderm	FALSE
Dr_zgc:174275;Xt_LOC100493966	Dr_zgc:174275;Xt_sp5l	0	0.435584	0.435584	Eukaryota	Dr_Blastula;Dr_Involuting marginal zone;Dr_Neuroectoderm	Xt_Blastula;Xt_Involuting marginal zone;Xt_Neuroectoderm	FALSE
Xt_hba4;Dr_hbaa1	Xt_hba4;Dr_hbbe3	0.0692819	0.504607	0.435325	Eukaryota			FALSE
Dr_zgc:174275;Xt_LOC101735121-like	Dr_zgc:174275;Xt_sp5l	0.000658014	0.435584	0.434926	Eukaryota	Dr_Blastula;Dr_Involuting marginal zone;Dr_Neuroectoderm	Xt_Blastula;Xt_Involuting marginal zone;Xt_Neuroectoderm	FALSE
Dr_her4.3;Xt_hes8	Dr_her4.3;Xt_hes6.2	0	0.434548	0.434548	Eukaryota	Dr_Forebrain/midbrain	Xt_Forebrain/midbrain	FALSE
Xt_hes6.2;Dr_her8.2	Xt_hes6.2;Dr_her4.3	0	0.434548	0.434548	Eukaryota	Dr_Forebrain/midbrain	Xt_Forebrain/midbrain	FALSE
Dr_pkp4;Xt_pkp4-like.1	Dr_pkp4;Xt_ctnnd1	0	0.434259	0.434259	Eukaryota	Dr_Dorsal organizer;Dr_Endoderm;Dr_Epidermal progenitor;Dr_Involuting marginal zone;Dr_Neuroectoderm;Dr_Non-neural ectoderm;Dr_Placodal area	Xt_Endoderm;Xt_Epidermal progenitor;Xt_Involuting marginal zone;Xt_Neuroectoderm;Xt_Non-neural ectoderm;Xt_Spemann organizer	FALSE
Dr_dmrt3a;Xt_dmrt3	Dr_dmrt3a;Xt_dmrta2	0	0.434069	0.434069	Eukaryota			FALSE
Dr_ltbp3;Xt_ltbp3	Dr_ltbp3;Xt_matn2	0	0.4337	0.4337	Eukaryota			FALSE
Xt_matn2;Dr_matn4	Xt_matn2;Dr_ltbp3	0	0.4337	0.4337	Eukaryota			FALSE
Dr_trim63b;Xt_trim63	Dr_trim63b;Xt_trim72	0.202904	0.635954	0.43305	Eukaryota	Dr_Skeletal muscle	Xt_Skeletal muscle	FALSE
Xt_col5a1-like;Dr_col5a1	Xt_col5a1-like;Dr_col5a3a	0.224044	0.656848	0.432805	Eukaryota	Dr_Notochord	Xt_Notochord	FALSE
Xt_hba-l5;Dr_si:xx-by187g17.1	Xt_hba-l5;Dr_hbbe3	0.405273	0.837907	0.432634	Eukaryota	Dr_Blood	Xt_Blood	FALSE
Dr_zgc:174275;Xt_Xetrov90015419m	Dr_zgc:174275;Xt_znf281	0.10176	0.533807	0.432047	Eukaryota	Dr_Blastula;Dr_Involuting marginal zone;Dr_Neuroectoderm;Dr_Non-neural ectoderm	Xt_Blastula;Xt_Involuting marginal zone;Xt_Neuroectoderm;Xt_Non-neural ectoderm	FALSE
Dr_dlx4b;Xt_dlx4	Dr_dlx4b;Xt_dlx2	0	0.431435	0.431435	Eukaryota	Dr_Otic placode	Xt_Otic placode	TRUE
Xt_hbz;Dr_si:xx-by187g17.1	Xt_hbz;Dr_hbbe2	0.353392	0.784656	0.431264	Eukaryota	Dr_Blood	Xt_Blood	FALSE
Dr_znf1137;Xt_LOC101735121-like	Dr_znf1137;Xt_sp1	0.0108699	0.441441	0.430571	Eukaryota			FALSE
Xt_crx;Dr_otx5	Xt_crx;Dr_otx1a	0	0.430413	0.430413	Eukaryota	Dr_Dorsal organizer;Dr_Endoderm;Dr_Neuroectoderm	Xt_Endoderm;Xt_Neuroectoderm;Xt_Non-neural ectoderm;Xt_Spemann organizer	FALSE
Xt_hba-l2;Dr_si:xx-by187g17.1	Xt_hba-l2;Dr_MGC173646	0.25417	0.684031	0.42986	Eukaryota	Dr_Blood	Xt_Blood	FALSE
Dr_zgc:174624;Xt_znf383	Dr_zgc:174624;Xt_znf281	0.0746702	0.504249	0.429579	Eukaryota	Dr_Blastula;Dr_Involuting marginal zone;Dr_Neuroectoderm;Dr_Non-neural ectoderm	Xt_Blastula;Xt_Involuting marginal zone;Xt_Neuroectoderm;Xt_Non-neural ectoderm	FALSE
Dr_sumo3b;Xt_sumo2	Dr_sumo3b;Xt_sumo1	0.0324746	0.461691	0.429217	Eukaryota	Dr_Dorsal organizer;Dr_Endoderm;Dr_Intermediate mesoderm;Dr_Involuting marginal zone;Dr_Neuroectoderm;Dr_Non-neural ectoderm;Dr_Tailbud	Xt_Endoderm;Xt_Hindbrain;Xt_Involuting marginal zone;Xt_Neuroectoderm;Xt_Non-neural ectoderm;Xt_Spemann organizer;Xt_Tailbud	FALSE
Xt_hbz;Dr_si:xx-by187g17.1	Xt_hbz;Dr_hbbe1.1	0.353392	0.782569	0.429177	Eukaryota	Dr_Blood	Xt_Blood	FALSE
Xt_LOC100486063;Dr_col6a6	Xt_LOC100486063;Dr_si:dkey-117n7.5	0	0.429069	0.429069	Eukaryota	Dr_Epidermal progenitor	Xt_Epidermal progenitor	FALSE
Xt_LOC100486063;Dr_LOC100535278	Xt_LOC100486063;Dr_si:dkey-117n7.5	0	0.429069	0.429069	Eukaryota	Dr_Epidermal progenitor	Xt_Epidermal progenitor	FALSE
Dr_cmlc1;Xt_myl3	Dr_cmlc1;Xt_myl1	0	0.428852	0.428852	Eukaryota	Dr_Skeletal muscle	Xt_Skeletal muscle	FALSE
Xt_hba-l5;Dr_si:xx-by187g17.1	Xt_hba-l5;Dr_hbbe2	0.405273	0.833071	0.427798	Eukaryota	Dr_Blood	Xt_Blood	FALSE
Xt_gata4;Dr_gata4	Xt_gata4;Dr_gata5	0	0.427304	0.427304	Eukaryota	Dr_Dorsal organizer;Dr_Endoderm;Dr_Intermediate mesoderm;Dr_Involuting marginal zone	Xt_Endoderm;Xt_Involuting marginal zone;Xt_Spemann organizer	TRUE
Dr_zgc:174624;Xt_Xetrov90029323m	Dr_zgc:174624;Xt_znf281	0.0780955	0.504249	0.426154	Eukaryota	Dr_Blastula;Dr_Involuting marginal zone;Dr_Neuroectoderm;Dr_Non-neural ectoderm	Xt_Blastula;Xt_Involuting marginal zone;Xt_Neuroectoderm;Xt_Non-neural ectoderm	FALSE
Dr_znf1137;Xt_Xetrov90001667m	Dr_znf1137;Xt_sp1	0.0158436	0.441441	0.425597	Eukaryota			FALSE
Dr_fev;Xt_fev	Dr_fev;Xt_gabpa	0.0325775	0.458083	0.425506	Eukaryota	Dr_Blastula;Dr_Dorsal organizer;Dr_Involuting marginal zone;Dr_Neuroectoderm;Dr_Non-neural ectoderm;Dr_Notochord	Xt_Blastula;Xt_Involuting marginal zone;Xt_Neuroectoderm;Xt_Non-neural ectoderm;Xt_Spemann organizer	FALSE
Dr_rasl11b;Xt_rasl11b	Dr_rasl11b;Xt_rhebl1	0	0.425171	0.425171	Eukaryota	Dr_Involuting marginal zone;Dr_Neuroectoderm;Dr_Non-neural ectoderm	Xt_Involuting marginal zone;Xt_Neuroectoderm;Xt_Non-neural ectoderm	FALSE
Dr_nkx2.2b;Xt_nkx2-2	Dr_nkx2.2b;Xt_nkx2-1	0.326025	0.751075	0.42505	Eukaryota	Dr_Forebrain/midbrain	Xt_Forebrain/midbrain	FALSE
Xt_znf281;Dr_LOC100005963	Xt_znf281;Dr_zgc:113886	0	0.424943	0.424943	Eukaryota	Dr_Blastula	Xt_Blastula	FALSE
Dr_zgc:113886;Xt_Xetrov90015421m	Dr_zgc:113886;Xt_znf281	0	0.424943	0.424943	Eukaryota	Dr_Blastula	Xt_Blastula	FALSE
Dr_zgc:113886;Xt_Xetrov90001667m	Dr_zgc:113886;Xt_znf281	0	0.424943	0.424943	Eukaryota	Dr_Blastula	Xt_Blastula	FALSE
Dr_zgc:113886;Xt_znf329	Dr_zgc:113886;Xt_znf281	0	0.424943	0.424943	Eukaryota	Dr_Blastula	Xt_Blastula	FALSE
Dr_zgc:113886;Xt_Xetrov90008367m	Dr_zgc:113886;Xt_znf281	0	0.424943	0.424943	Eukaryota	Dr_Blastula	Xt_Blastula	FALSE
Dr_zgc:113886;Xt_Xetrov90029323m	Dr_zgc:113886;Xt_znf281	0	0.424943	0.424943	Eukaryota	Dr_Blastula	Xt_Blastula	FALSE
Dr_zgc:113886;Xt_LOC100493966	Dr_zgc:113886;Xt_znf281	0	0.424943	0.424943	Eukaryota	Dr_Blastula	Xt_Blastula	FALSE
Dr_zgc:113886;Xt_LOC101735121-like	Dr_zgc:113886;Xt_znf281	0	0.424943	0.424943	Eukaryota	Dr_Blastula	Xt_Blastula	FALSE
Dr_zgc:113886;Xt_znf383	Dr_zgc:113886;Xt_znf281	0	0.424943	0.424943	Eukaryota	Dr_Blastula	Xt_Blastula	FALSE
Dr_zgc:113886;Xt_znf250	Dr_zgc:113886;Xt_znf281	0	0.424943	0.424943	Eukaryota	Dr_Blastula	Xt_Blastula	FALSE
Dr_zgc:113886;Xt_LOC100496403-like	Dr_zgc:113886;Xt_znf281	0	0.424943	0.424943	Eukaryota	Dr_Blastula	Xt_Blastula	TRUE
Dr_zgc:113886;Xt_LOC100496561	Dr_zgc:113886;Xt_znf281	0	0.424943	0.424943	Eukaryota	Dr_Blastula	Xt_Blastula	TRUE
Dr_zgc:113886;Xt_LOC101734394	Dr_zgc:113886;Xt_znf281	0	0.424943	0.424943	Eukaryota	Dr_Blastula	Xt_Blastula	FALSE
Xt_hba4;Dr_hbaa1	Xt_hba4;Dr_MGC173646	0.0692819	0.493758	0.424476	Eukaryota			FALSE
Xt_taf15;Dr_taf15	Xt_taf15;Dr_ewsr1b	0	0.424242	0.424242	Eukaryota	Dr_Involuting marginal zone;Dr_Neuroectoderm;Dr_Non-neural ectoderm;Dr_Presomitic mesoderm;Dr_Tailbud	Xt_Hindbrain;Xt_Involuting marginal zone;Xt_Neuroectoderm;Xt_Non-neural ectoderm;Xt_Tailbud	FALSE
Dr_zgc:174275;Xt_LOC100496561	Dr_zgc:174275;Xt_sp5l	0.0119995	0.435584	0.423585	Eukaryota	Dr_Blastula;Dr_Involuting marginal zone;Dr_Neuroectoderm	Xt_Blastula;Xt_Involuting marginal zone;Xt_Neuroectoderm	TRUE
Dr_hbae3;Xt_hba2	Dr_hbae3;Xt_LOC100216007	0.213042	0.635942	0.422899	Eukaryota	Dr_Blood	Xt_Blood	TRUE
Dr_zgc:174275;Xt_LOC100497179-like	Dr_zgc:174275;Xt_znf281	0.110944	0.533807	0.422862	Eukaryota	Dr_Blastula;Dr_Involuting marginal zone;Dr_Neuroectoderm;Dr_Non-neural ectoderm	Xt_Blastula;Xt_Involuting marginal zone;Xt_Neuroectoderm;Xt_Non-neural ectoderm	FALSE
Dr_zgc:173619;Xt_znf383	Dr_zgc:173619;Xt_sp3	0.022655	0.445146	0.422491	Eukaryota	Dr_Involuting marginal zone;Dr_Neuroectoderm;Dr_Non-neural ectoderm	Xt_Involuting marginal zone;Xt_Neuroectoderm;Xt_Non-neural ectoderm	FALSE
Dr_fkbp11;Xt_fkbp11	Dr_fkbp11;Xt_fkbp10	0	0.42248	0.42248	Eukaryota	Dr_Epidermal progenitor;Dr_Intermediate mesoderm;Dr_Notochord	Xt_Endothelial;Xt_Epidermal progenitor;Xt_Intermediate mesoderm;Xt_Notochord	FALSE
Xt_fkbp10;Dr_fkbp10a	Xt_fkbp10;Dr_fkbp11	0	0.42248	0.42248	Eukaryota	Dr_Epidermal progenitor;Dr_Intermediate mesoderm;Dr_Notochord	Xt_Endothelial;Xt_Epidermal progenitor;Xt_Intermediate mesoderm;Xt_Notochord	FALSE
Dr_hbae3;Xt_hba2	Dr_hbae3;Xt_LOC100037901	0.213042	0.635339	0.422296	Eukaryota	Dr_Blood	Xt_Blood	TRUE
Dr_zgc:174275;Xt_Xetrov90001667m	Dr_zgc:174275;Xt_sp5l	0.0136898	0.435584	0.421895	Eukaryota	Dr_Blastula;Dr_Involuting marginal zone;Dr_Neuroectoderm	Xt_Blastula;Xt_Involuting marginal zone;Xt_Neuroectoderm	FALSE
Dr_znf1137;Xt_znf250	Dr_znf1137;Xt_sp5l	0	0.420722	0.420722	Eukaryota	Dr_Blastula;Dr_Involuting marginal zone;Dr_Neuroectoderm	Xt_Blastula;Xt_Involuting marginal zone;Xt_Neuroectoderm	FALSE
Dr_znf1137;Xt_LOC100493966	Dr_znf1137;Xt_sp5l	0	0.420722	0.420722	Eukaryota	Dr_Blastula;Dr_Involuting marginal zone;Dr_Neuroectoderm	Xt_Blastula;Xt_Involuting marginal zone;Xt_Neuroectoderm	FALSE
Dr_znf1137;Xt_znf329	Dr_znf1137;Xt_sp5l	0	0.420722	0.420722	Eukaryota	Dr_Blastula;Dr_Involuting marginal zone;Dr_Neuroectoderm	Xt_Blastula;Xt_Involuting marginal zone;Xt_Neuroectoderm	FALSE
Dr_zgc:174624;Xt_Xetrov90008367m	Dr_zgc:174624;Xt_znf281	0.0836861	0.504249	0.420563	Eukaryota	Dr_Blastula;Dr_Involuting marginal zone;Dr_Neuroectoderm;Dr_Non-neural ectoderm	Xt_Blastula;Xt_Involuting marginal zone;Xt_Neuroectoderm;Xt_Non-neural ectoderm	FALSE
Xt_nme7;Dr_nme7	Xt_nme7;Dr_nme5	0.143495	0.563814	0.420319	Eukaryota			FALSE
Dr_foxi1;Xt_foxi2	Dr_foxi1;Xt_foxi4.2	0	0.419836	0.419836	Eukaryota	Dr_Non-neural ectoderm;Dr_Placodal area	Xt_Non-neural ectoderm;Xt_Placodal area	FALSE
Dr_rheb;Xt_rheb	Dr_rheb;Xt_rhebl1	0	0.419698	0.419698	Eukaryota	Dr_Involuting marginal zone;Dr_Neuroectoderm;Dr_Non-neural ectoderm	Xt_Involuting marginal zone;Xt_Neuroectoderm;Xt_Non-neural ectoderm	FALSE
Xt_hba-l2;Dr_si:xx-by187g17.1	Xt_hba-l2;Dr_hbbe1.1	0.25417	0.673547	0.419377	Eukaryota	Dr_Blood	Xt_Blood	FALSE
Xt_vezf1;Dr_vezf1a	Xt_vezf1;Dr_si:ch211-198a12.6	0.0320253	0.451069	0.419043	Eukaryota	Dr_Involuting marginal zone;Dr_Neuroectoderm;Dr_Non-neural ectoderm	Xt_Involuting marginal zone;Xt_Neuroectoderm;Xt_Non-neural ectoderm	FALSE
Xt_hba-l2;Dr_hbaa1	Xt_hba-l2;Dr_zgc:163057	0.145475	0.563567	0.418091	Eukaryota	Dr_Blood	Xt_Blood	FALSE
Xt_nkx2-1;Dr_nkx2.1	Xt_nkx2-1;Dr_nkx2.2b	0.333604	0.751075	0.417471	Eukaryota	Dr_Forebrain/midbrain	Xt_Forebrain/midbrain	FALSE
Xt_hba4;Dr_hbaa1	Xt_hba4;Dr_hbbe1.1	0.0692819	0.486727	0.417445	Eukaryota			FALSE
Dr_znf1137;Xt_Xetrov90015419m	Dr_znf1137;Xt_znf281	0.127324	0.544638	0.417313	Eukaryota	Dr_Blastula;Dr_Involuting marginal zone;Dr_Neuroectoderm;Dr_Non-neural ectoderm	Xt_Blastula;Xt_Involuting marginal zone;Xt_Neuroectoderm;Xt_Non-neural ectoderm	FALSE
Xt_vezf1;Dr_vezf1a	Xt_vezf1;Dr_LOC570015	0.0320253	0.44885	0.416825	Eukaryota	Dr_Dorsal organizer;Dr_Involuting marginal zone;Dr_Neuroectoderm;Dr_Non-neural ectoderm;Dr_Notochord;Dr_Tailbud	Xt_Involuting marginal zone;Xt_Neuroectoderm;Xt_Non-neural ectoderm;Xt_Spemann organizer;Xt_Tailbud	FALSE
Xt_foxi2;Dr_foxi1	Xt_foxi2;Dr_foxn2b	0	0.416811	0.416811	Eukaryota	Dr_Blastula	Xt_Blastula	FALSE
Dr_fkbp11;Xt_fkbp11	Dr_fkbp11;Xt_fkbp9	0	0.415869	0.415869	Eukaryota	Dr_Epidermal progenitor;Dr_Intermediate mesoderm;Dr_Notochord	Xt_Endothelial;Xt_Epidermal progenitor;Xt_Intermediate mesoderm;Xt_Notochord;Xt_Spemann organizer	FALSE
Dr_hoxa10b;Xt_hoxa10	Dr_hoxa10b;Xt_hoxd10	0.183478	0.598946	0.415468	Eukaryota	Dr_Presomitic mesoderm;Dr_Tailbud	Xt_Presomitic mesoderm;Xt_Tailbud	FALSE
Dr_hoxd13a;Xt_hoxd13	Dr_hoxd13a;Xt_hoxc11	0	0.415194	0.415194	Eukaryota	Dr_Presomitic mesoderm	Xt_Presomitic mesoderm;Xt_Tailbud	TRUE
Dr_znf1137;Xt_LOC100496561	Dr_znf1137;Xt_sp5l	0.00565628	0.420722	0.415066	Eukaryota	Dr_Blastula;Dr_Involuting marginal zone;Dr_Neuroectoderm	Xt_Blastula;Xt_Involuting marginal zone;Xt_Neuroectoderm	TRUE
Dr_znf1137;Xt_LOC101734394	Dr_znf1137;Xt_sp1	0.0267137	0.441441	0.414727	Eukaryota			FALSE
Dr_zgc:174624;Xt_Xetrov90015419m	Dr_zgc:174624;Xt_znf281	0.0900177	0.504249	0.414231	Eukaryota	Dr_Blastula;Dr_Involuting marginal zone;Dr_Neuroectoderm;Dr_Non-neural ectoderm	Xt_Blastula;Xt_Involuting marginal zone;Xt_Neuroectoderm;Xt_Non-neural ectoderm	FALSE
Dr_hoxb9a;Xt_hoxb9	Dr_hoxb9a;Xt_hoxd11	0.0703406	0.484177	0.413836	Eukaryota	Dr_Presomitic mesoderm;Dr_Tailbud	Xt_Presomitic mesoderm;Xt_Tailbud	FALSE
Xt_znf281;Dr_LOC100005963	Xt_znf281;Dr_LOC103908671	0	0.41383	0.41383	Eukaryota	Dr_Blastula	Xt_Blastula	FALSE
Dr_znf1137;Xt_LOC100497179-like	Dr_znf1137;Xt_znf281	0.130994	0.544638	0.413643	Eukaryota	Dr_Blastula;Dr_Involuting marginal zone;Dr_Neuroectoderm;Dr_Non-neural ectoderm	Xt_Blastula;Xt_Involuting marginal zone;Xt_Neuroectoderm;Xt_Non-neural ectoderm	FALSE
Dr_erg;Xt_erg	Dr_erg;Xt_elk3	0.0429576	0.456597	0.413639	Eukaryota			FALSE
Xt_znf281;Dr_LOC100005963	Xt_znf281;Dr_zgc:100951	0	0.413333	0.413333	Eukaryota	Dr_Blastula	Xt_Blastula	FALSE
Dr_zgc:174275;Xt_LOC100493966	Dr_zgc:174275;Xt_sp1	0	0.413265	0.413265	Eukaryota			FALSE
Dr_zgc:174275;Xt_znf329	Dr_zgc:174275;Xt_sp1	0	0.413265	0.413265	Eukaryota			FALSE
Xt_h3f3b;Dr_h3f3a	Xt_h3f3b;Dr_cenpa	0	0.412679	0.412679	Eukaryota	Dr_Eye primordium;Dr_Forebrain/midbrain;Dr_Hindbrain;Dr_Intermediate mesoderm;Dr_Neural crest;Dr_Optic;Dr_Presomitic mesoderm;Dr_Tailbud	Xt_Endothelial;Xt_Eye primordium;Xt_Forebrain/midbrain;Xt_Hindbrain;Xt_Intermediate mesoderm;Xt_Neural crest;Xt_Optic;Xt_Skeletal muscle	FALSE
Xt_h3f3b;Dr_h3f3d	Xt_h3f3b;Dr_cenpa	0	0.412679	0.412679	Eukaryota	Dr_Eye primordium;Dr_Forebrain/midbrain;Dr_Hindbrain;Dr_Intermediate mesoderm;Dr_Neural crest;Dr_Optic;Dr_Presomitic mesoderm;Dr_Tailbud	Xt_Endothelial;Xt_Eye primordium;Xt_Forebrain/midbrain;Xt_Hindbrain;Xt_Intermediate mesoderm;Xt_Neural crest;Xt_Optic;Xt_Skeletal muscle	FALSE
Dr_cenpa;Xt_cenpa	Dr_cenpa;Xt_h3f3b	0	0.412679	0.412679	Eukaryota	Dr_Eye primordium;Dr_Forebrain/midbrain;Dr_Hindbrain;Dr_Intermediate mesoderm;Dr_Neural crest;Dr_Optic;Dr_Presomitic mesoderm;Dr_Tailbud	Xt_Endothelial;Xt_Eye primordium;Xt_Forebrain/midbrain;Xt_Hindbrain;Xt_Intermediate mesoderm;Xt_Neural crest;Xt_Optic;Xt_Skeletal muscle	FALSE
Dr_zgc:174275;Xt_LOC101735121-like	Dr_zgc:174275;Xt_sp1	0.000658014	0.413265	0.412607	Eukaryota			FALSE
Dr_LOC103910469;Xt_LOC100495499	Dr_LOC103910469;Xt_bcl6	0.0753864	0.487935	0.412549	Eukaryota	Dr_Blastula	Xt_Blastula	FALSE
Dr_hbz;Xt_hba2	Dr_hbz;Xt_hbd	0	0.412372	0.412372	Eukaryota	Dr_Blood	Xt_Blood	TRUE
Dr_hbz;Xt_hba-l3	Dr_hbz;Xt_hbd	0	0.412372	0.412372	Eukaryota	Dr_Blood	Xt_Blood	TRUE
Dr_zgc:174275;Xt_LOC101734394	Dr_zgc:174275;Xt_sp5l	0.0234848	0.435584	0.4121	Eukaryota	Dr_Blastula;Dr_Involuting marginal zone;Dr_Neuroectoderm	Xt_Blastula;Xt_Involuting marginal zone;Xt_Neuroectoderm	FALSE
Dr_si:ch211-132b12.8;Xt_cntd2	Dr_si:ch211-132b12.8;Xt_ccnb1	0.336913	0.748899	0.411986	Eukaryota	Dr_Blastula	Xt_Blastula	FALSE
Dr_zgc:174624;Xt_znf250	Dr_zgc:174624;Xt_znf281	0.0928963	0.504249	0.411353	Eukaryota	Dr_Blastula;Dr_Involuting marginal zone;Dr_Neuroectoderm;Dr_Non-neural ectoderm	Xt_Blastula;Xt_Involuting marginal zone;Xt_Neuroectoderm;Xt_Non-neural ectoderm	FALSE
Dr_zgc:174275;Xt_LOC100496403-like	Dr_zgc:174275;Xt_sp5l	0.0243658	0.435584	0.411219	Eukaryota	Dr_Blastula;Dr_Involuting marginal zone;Dr_Neuroectoderm	Xt_Blastula;Xt_Involuting marginal zone;Xt_Neuroectoderm	TRUE
Xt_lamp1;Dr_zgc:64072	Xt_lamp1;Dr_lamp2	0.170279	0.581469	0.41119	Eukaryota	Dr_Blastula;Dr_Dorsal organizer;Dr_Involuting marginal zone;Dr_Neuroectoderm;Dr_Notochord	Xt_Blastula;Xt_Involuting marginal zone;Xt_Neuroectoderm;Xt_Non-neural ectoderm;Xt_Notochord;Xt_Spemann organizer	FALSE
Xt_tox2;Dr_tox2	Xt_tox2;Dr_tox	0.133864	0.544291	0.410427	Eukaryota	Dr_Eye primordium;Dr_Forebrain/midbrain;Dr_Hindbrain;Dr_Neuron;Dr_Optic;Dr_Tailbud	Xt_Eye primordium;Xt_Forebrain/midbrain;Xt_Hindbrain;Xt_Neuron;Xt_Optic	FALSE
Dr_si:ch211-5k11.2;Xt_hba2	Dr_si:ch211-5k11.2;Xt_LOC100145107	0.213684	0.623609	0.409925	Eukaryota	Dr_Blood	Xt_Blood	TRUE
Dr_si:ch211-5k11.2;Xt_hba2	Dr_si:ch211-5k11.2;Xt_LOC101735171	0.213684	0.623607	0.409923	Eukaryota	Dr_Blood	Xt_Blood	TRUE
Dr_znf1137;Xt_LOC101735121-like	Dr_znf1137;Xt_sp5l	0.0108699	0.420722	0.409852	Eukaryota	Dr_Blastula;Dr_Involuting marginal zone;Dr_Neuroectoderm	Xt_Blastula;Xt_Involuting marginal zone;Xt_Neuroectoderm	FALSE
Xt_hoxa11;Dr_hoxa11b	Xt_hoxa11;Dr_hoxa10b	0	0.409658	0.409658	Eukaryota	Dr_Presomitic mesoderm	Xt_Presomitic mesoderm	FALSE
Dr_znf1137;Xt_LOC100496403-like	Dr_znf1137;Xt_sp1	0.0324707	0.441441	0.40897	Eukaryota			TRUE
Dr_rap1aa;Xt_rap1b	Dr_rap1aa;Xt_ralb	0.0203458	0.429049	0.408703	Eukaryota	Dr_Dorsal organizer;Dr_Endoderm;Dr_Involuting marginal zone;Dr_Neuroectoderm;Dr_Non-neural ectoderm;Dr_Notochord	Xt_Endoderm;Xt_Involuting marginal zone;Xt_Neuroectoderm;Xt_Non-neural ectoderm;Xt_Small secretory cells;Xt_Spemann organizer	FALSE
Dr_si:dkey-57k17.1;Xt_znf329	Dr_si:dkey-57k17.1;Xt_znf281	0	0.408622	0.408622	Eukaryota	Dr_Involuting marginal zone;Dr_Neuroectoderm;Dr_Non-neural ectoderm	Xt_Involuting marginal zone;Xt_Neuroectoderm;Xt_Non-neural ectoderm	FALSE
Dr_si:dkey-57k17.1;Xt_LOC100493966	Dr_si:dkey-57k17.1;Xt_znf281	0	0.408622	0.408622	Eukaryota	Dr_Involuting marginal zone;Dr_Neuroectoderm;Dr_Non-neural ectoderm	Xt_Involuting marginal zone;Xt_Neuroectoderm;Xt_Non-neural ectoderm	FALSE
Dr_si:dkey-57k17.1;Xt_LOC101735121-like	Dr_si:dkey-57k17.1;Xt_znf281	0	0.408622	0.408622	Eukaryota	Dr_Involuting marginal zone;Dr_Neuroectoderm;Dr_Non-neural ectoderm	Xt_Involuting marginal zone;Xt_Neuroectoderm;Xt_Non-neural ectoderm	FALSE
Dr_si:dkey-57k17.1;Xt_Xetrov90001667m	Dr_si:dkey-57k17.1;Xt_znf281	0	0.408622	0.408622	Eukaryota	Dr_Involuting marginal zone;Dr_Neuroectoderm;Dr_Non-neural ectoderm	Xt_Involuting marginal zone;Xt_Neuroectoderm;Xt_Non-neural ectoderm	FALSE
Xt_znf281;Dr_LOC100005963	Xt_znf281;Dr_si:dkey-57k17.1	0	0.408622	0.408622	Eukaryota	Dr_Involuting marginal zone;Dr_Neuroectoderm;Dr_Non-neural ectoderm	Xt_Involuting marginal zone;Xt_Neuroectoderm;Xt_Non-neural ectoderm	FALSE
Dr_LOC103908654;Xt_Xetrov90001667m	Dr_LOC103908654;Xt_zfat	0	0.408338	0.408338	Eukaryota	Dr_Blastula;Dr_Involuting marginal zone;Dr_Neuroectoderm;Dr_Non-neural ectoderm	Xt_Blastula;Xt_Involuting marginal zone;Xt_Neuroectoderm;Xt_Non-neural ectoderm	FALSE
Dr_LOC103908654;Xt_LOC100496561	Dr_LOC103908654;Xt_zfat	0	0.408338	0.408338	Eukaryota	Dr_Blastula;Dr_Involuting marginal zone;Dr_Neuroectoderm;Dr_Non-neural ectoderm	Xt_Blastula;Xt_Involuting marginal zone;Xt_Neuroectoderm;Xt_Non-neural ectoderm	TRUE
Dr_LOC103908654;Xt_znf383	Dr_LOC103908654;Xt_zfat	0	0.408338	0.408338	Eukaryota	Dr_Blastula;Dr_Involuting marginal zone;Dr_Neuroectoderm;Dr_Non-neural ectoderm	Xt_Blastula;Xt_Involuting marginal zone;Xt_Neuroectoderm;Xt_Non-neural ectoderm	FALSE
Dr_LOC103908654;Xt_LOC101734394	Dr_LOC103908654;Xt_zfat	0	0.408338	0.408338	Eukaryota	Dr_Blastula;Dr_Involuting marginal zone;Dr_Neuroectoderm;Dr_Non-neural ectoderm	Xt_Blastula;Xt_Involuting marginal zone;Xt_Neuroectoderm;Xt_Non-neural ectoderm	FALSE
Xt_zfat;Dr_zfat	Xt_zfat;Dr_LOC103908654	0	0.408338	0.408338	Eukaryota	Dr_Blastula;Dr_Involuting marginal zone;Dr_Neuroectoderm;Dr_Non-neural ectoderm	Xt_Blastula;Xt_Involuting marginal zone;Xt_Neuroectoderm;Xt_Non-neural ectoderm	FALSE
Dr_LOC103908654;Xt_Xetrov90015421m	Dr_LOC103908654;Xt_zfat	0	0.408338	0.408338	Eukaryota	Dr_Blastula;Dr_Involuting marginal zone;Dr_Neuroectoderm;Dr_Non-neural ectoderm	Xt_Blastula;Xt_Involuting marginal zone;Xt_Neuroectoderm;Xt_Non-neural ectoderm	FALSE
Dr_LOC103908654;Xt_LOC100493966	Dr_LOC103908654;Xt_zfat	0	0.408338	0.408338	Eukaryota	Dr_Blastula;Dr_Involuting marginal zone;Dr_Neuroectoderm;Dr_Non-neural ectoderm	Xt_Blastula;Xt_Involuting marginal zone;Xt_Neuroectoderm;Xt_Non-neural ectoderm	FALSE
Dr_LOC103908654;Xt_znf250	Dr_LOC103908654;Xt_zfat	0	0.408338	0.408338	Eukaryota	Dr_Blastula;Dr_Involuting marginal zone;Dr_Neuroectoderm;Dr_Non-neural ectoderm	Xt_Blastula;Xt_Involuting marginal zone;Xt_Neuroectoderm;Xt_Non-neural ectoderm	FALSE
Dr_LOC103908654;Xt_Xetrov90008367m	Dr_LOC103908654;Xt_zfat	0	0.408338	0.408338	Eukaryota	Dr_Blastula;Dr_Involuting marginal zone;Dr_Neuroectoderm;Dr_Non-neural ectoderm	Xt_Blastula;Xt_Involuting marginal zone;Xt_Neuroectoderm;Xt_Non-neural ectoderm	FALSE
Dr_LOC103908654;Xt_znf329	Dr_LOC103908654;Xt_zfat	0	0.408338	0.408338	Eukaryota	Dr_Blastula;Dr_Involuting marginal zone;Dr_Neuroectoderm;Dr_Non-neural ectoderm	Xt_Blastula;Xt_Involuting marginal zone;Xt_Neuroectoderm;Xt_Non-neural ectoderm	FALSE
Dr_LOC103908654;Xt_LOC101735121-like	Dr_LOC103908654;Xt_zfat	0	0.408338	0.408338	Eukaryota	Dr_Blastula;Dr_Involuting marginal zone;Dr_Neuroectoderm;Dr_Non-neural ectoderm	Xt_Blastula;Xt_Involuting marginal zone;Xt_Neuroectoderm;Xt_Non-neural ectoderm	FALSE
Dr_kdelr2b;Xt_kdelr2	Dr_kdelr2b;Xt_kdelr3	0	0.406669	0.406669	Eukaryota	Dr_Notochord;Dr_Secretory epidermal	Xt_Cement gland primordium;Xt_Notochord	FALSE
Dr_zgc:173703;Xt_znf383	Dr_zgc:173703;Xt_znf518b	0	0.406179	0.406179	Eukaryota	Dr_Blastula	Xt_Blastula	FALSE
Dr_zgc:173703;Xt_Xetrov90001667m	Dr_zgc:173703;Xt_znf518b	0	0.406179	0.406179	Eukaryota	Dr_Blastula	Xt_Blastula	FALSE
Dr_zgc:173703;Xt_znf329	Dr_zgc:173703;Xt_znf518b	0	0.406179	0.406179	Eukaryota	Dr_Blastula	Xt_Blastula	FALSE
Dr_zgc:173703;Xt_znf250	Dr_zgc:173703;Xt_znf518b	0	0.406179	0.406179	Eukaryota	Dr_Blastula	Xt_Blastula	FALSE
Dr_zgc:173703;Xt_Xetrov90029323m	Dr_zgc:173703;Xt_znf518b	0	0.406179	0.406179	Eukaryota	Dr_Blastula	Xt_Blastula	FALSE
Dr_zgc:173703;Xt_LOC101734394	Dr_zgc:173703;Xt_znf518b	0	0.406179	0.406179	Eukaryota	Dr_Blastula	Xt_Blastula	FALSE
Dr_zgc:173703;Xt_LOC100493966	Dr_zgc:173703;Xt_znf518b	0	0.406179	0.406179	Eukaryota	Dr_Blastula	Xt_Blastula	FALSE
Dr_zgc:173703;Xt_LOC100496561	Dr_zgc:173703;Xt_znf518b	0	0.406179	0.406179	Eukaryota	Dr_Blastula	Xt_Blastula	TRUE
Dr_zgc:173703;Xt_LOC101735121-like	Dr_zgc:173703;Xt_znf518b	0	0.406179	0.406179	Eukaryota	Dr_Blastula	Xt_Blastula	FALSE
Dr_zgc:174275;Xt_znf250	Dr_zgc:174275;Xt_znf281	0.127652	0.533807	0.406154	Eukaryota	Dr_Blastula;Dr_Involuting marginal zone;Dr_Neuroectoderm;Dr_Non-neural ectoderm	Xt_Blastula;Xt_Involuting marginal zone;Xt_Neuroectoderm;Xt_Non-neural ectoderm	FALSE
Xt_taf15;Dr_taf15	Xt_taf15;Dr_zranb2	0	0.406092	0.406092	Eukaryota	Dr_Involuting marginal zone;Dr_Neuroectoderm;Dr_Non-neural ectoderm;Dr_Tailbud	Xt_Hindbrain;Xt_Involuting marginal zone;Xt_Neuroectoderm;Xt_Non-neural ectoderm;Xt_Tailbud	FALSE
Dr_zranb2;Xt_zranb2	Dr_zranb2;Xt_taf15	0	0.406092	0.406092	Eukaryota	Dr_Involuting marginal zone;Dr_Neuroectoderm;Dr_Non-neural ectoderm;Dr_Tailbud	Xt_Hindbrain;Xt_Involuting marginal zone;Xt_Neuroectoderm;Xt_Non-neural ectoderm;Xt_Tailbud	FALSE
Xt_hoxa11;Dr_hoxa11b	Xt_hoxa11;Dr_hoxc9a	0	0.405776	0.405776	Eukaryota	Dr_Presomitic mesoderm	Xt_Presomitic mesoderm	FALSE
Dr_rap1aa;Xt_rap1a	Dr_rap1aa;Xt_ralb	0.0236008	0.429049	0.405448	Eukaryota	Dr_Dorsal organizer;Dr_Endoderm;Dr_Involuting marginal zone;Dr_Neuroectoderm;Dr_Non-neural ectoderm;Dr_Notochord	Xt_Endoderm;Xt_Involuting marginal zone;Xt_Neuroectoderm;Xt_Non-neural ectoderm;Xt_Small secretory cells;Xt_Spemann organizer	FALSE
Dr_LOC100334599;Xt_hba2	Dr_LOC100334599;Xt_LOC101735171	0.219352	0.624512	0.405159	Eukaryota	Dr_Blood	Xt_Blood	TRUE
Xt_LOC101733226;Dr_eppk1	Xt_LOC101733226;Dr_dspa	0.114733	0.519848	0.405115	Eukaryota	Dr_Endoderm;Dr_Epidermal progenitor;Dr_Ionocyte;Dr_Non-neural ectoderm;Dr_Placodal area;Dr_Rare epidermal subtypes;Dr_Secretory epidermal	Xt_Cement gland primordium;Xt_Epidermal progenitor;Xt_Goblet cell;Xt_Hatching gland;Xt_Ionocyte;Xt_Non-neural ectoderm;Xt_Small secretory cells	FALSE
Xt_fus;Dr_fus	Xt_fus;Dr_ewsr1b	0.106331	0.511213	0.404881	Eukaryota	Dr_Dorsal organizer;Dr_Endoderm;Dr_Involuting marginal zone;Dr_Neuroectoderm;Dr_Non-neural ectoderm;Dr_Notochord;Dr_Presomitic mesoderm;Dr_Tailbud	Xt_Endoderm;Xt_Hindbrain;Xt_Involuting marginal zone;Xt_Neuroectoderm;Xt_Non-neural ectoderm;Xt_Spemann organizer;Xt_Tailbud	FALSE
Dr_znf1137;Xt_Xetrov90001667m	Dr_znf1137;Xt_sp5l	0.0158436	0.420722	0.404878	Eukaryota	Dr_Blastula;Dr_Involuting marginal zone;Dr_Neuroectoderm	Xt_Blastula;Xt_Involuting marginal zone;Xt_Neuroectoderm	FALSE
Dr_rgs2;Xt_rgs2	Dr_rgs2;Xt_rgs1	0	0.404681	0.404681	Eukaryota	Dr_Macrophage	Xt_Myeloid progenitors	FALSE
Xt_rhoc;Dr_zgc:153713	Xt_rhoc;Dr_rhogc	0	0.404556	0.404556	Eukaryota	Dr_Blastula;Dr_Neuroectoderm;Dr_Non-neural ectoderm	Xt_Blastula;Xt_Neuroectoderm;Xt_Non-neural ectoderm	FALSE
Dr_zgc:173703;Xt_znf383	Dr_zgc:173703;Xt_znf281	0	0.404482	0.404482	Eukaryota	Dr_Blastula;Dr_Neuroectoderm	Xt_Blastula;Xt_Neuroectoderm;Xt_Non-neural ectoderm	FALSE
Dr_zgc:173703;Xt_LOC100496561	Dr_zgc:173703;Xt_znf281	0	0.404482	0.404482	Eukaryota	Dr_Blastula;Dr_Neuroectoderm	Xt_Blastula;Xt_Neuroectoderm;Xt_Non-neural ectoderm	TRUE
Dr_zgc:173703;Xt_Xetrov90029323m	Dr_zgc:173703;Xt_znf281	0	0.404482	0.404482	Eukaryota	Dr_Blastula;Dr_Neuroectoderm	Xt_Blastula;Xt_Neuroectoderm;Xt_Non-neural ectoderm	FALSE
Dr_zgc:173703;Xt_znf250	Dr_zgc:173703;Xt_znf281	0	0.404482	0.404482	Eukaryota	Dr_Blastula;Dr_Neuroectoderm	Xt_Blastula;Xt_Neuroectoderm;Xt_Non-neural ectoderm	FALSE
Dr_zgc:173703;Xt_Xetrov90001667m	Dr_zgc:173703;Xt_znf281	0	0.404482	0.404482	Eukaryota	Dr_Blastula;Dr_Neuroectoderm	Xt_Blastula;Xt_Neuroectoderm;Xt_Non-neural ectoderm	FALSE
Xt_znf281;Dr_LOC100005963	Xt_znf281;Dr_zgc:173703	0	0.404482	0.404482	Eukaryota	Dr_Blastula;Dr_Neuroectoderm	Xt_Blastula;Xt_Neuroectoderm;Xt_Non-neural ectoderm	FALSE
Dr_zgc:173703;Xt_LOC101734394	Dr_zgc:173703;Xt_znf281	0	0.404482	0.404482	Eukaryota	Dr_Blastula;Dr_Neuroectoderm	Xt_Blastula;Xt_Neuroectoderm;Xt_Non-neural ectoderm	FALSE
Dr_zgc:173703;Xt_LOC101735121-like	Dr_zgc:173703;Xt_znf281	0	0.404482	0.404482	Eukaryota	Dr_Blastula;Dr_Neuroectoderm	Xt_Blastula;Xt_Neuroectoderm;Xt_Non-neural ectoderm	FALSE
Dr_zgc:173703;Xt_LOC100493966	Dr_zgc:173703;Xt_znf281	0	0.404482	0.404482	Eukaryota	Dr_Blastula;Dr_Neuroectoderm	Xt_Blastula;Xt_Neuroectoderm;Xt_Non-neural ectoderm	FALSE
Dr_zgc:173703;Xt_znf329	Dr_zgc:173703;Xt_znf281	0	0.404482	0.404482	Eukaryota	Dr_Blastula;Dr_Neuroectoderm	Xt_Blastula;Xt_Neuroectoderm;Xt_Non-neural ectoderm	FALSE
Dr_si:dkey-57k17.1;Xt_LOC100496561	Dr_si:dkey-57k17.1;Xt_znf281	0.00428836	0.408622	0.404333	Eukaryota	Dr_Involuting marginal zone;Dr_Neuroectoderm;Dr_Non-neural ectoderm	Xt_Involuting marginal zone;Xt_Neuroectoderm;Xt_Non-neural ectoderm	TRUE
Xt_myh2;Dr_myhb	Xt_myh2;Dr_myhz1.1	0	0.404248	0.404248	Eukaryota			FALSE
Xt_myh2;Dr_zgc:66156	Xt_myh2;Dr_myhz1.1	0	0.404248	0.404248	Eukaryota			TRUE
Xt_myh2;Dr_wu:fd14a01	Xt_myh2;Dr_myhz1.1	0	0.404248	0.404248	Eukaryota			FALSE
Xt_myh2;Dr_LOC100537594	Xt_myh2;Dr_myhz1.1	0	0.404248	0.404248	Eukaryota			FALSE
Dr_LOC100334599;Xt_hba2	Dr_LOC100334599;Xt_LOC100145107	0.219352	0.62356	0.404207	Eukaryota	Dr_Blood	Xt_Blood	TRUE
Dr_srpk3;Xt_srpk3	Dr_srpk3;Xt_LOC100144966	0	0.404063	0.404063	Eukaryota			FALSE
Dr_srpk3;Xt_srpk1	Dr_srpk3;Xt_LOC100144966	0	0.404063	0.404063	Eukaryota			FALSE
Xt_LOC100144966;Dr_si:ch211-220i18.4	Xt_LOC100144966;Dr_srpk3	0	0.404063	0.404063	Eukaryota			TRUE
Dr_ubtf;Xt_ubtf	Dr_ubtf;Xt_hmgb3	0.15508	0.558048	0.402969	Eukaryota	Dr_Dorsal organizer;Dr_Involuting marginal zone;Dr_Neuroectoderm;Dr_Non-neural ectoderm;Dr_Presomitic mesoderm;Dr_Tailbud	Xt_Hindbrain;Xt_Involuting marginal zone;Xt_Neuroectoderm;Xt_Non-neural ectoderm;Xt_Spemann organizer;Xt_Tailbud	FALSE
Xt_hba3;Dr_hbz	Xt_hba3;Dr_hbbe3	0.551778	0.954636	0.402858	Eukaryota	Dr_Blood	Xt_Blood	FALSE
Dr_gb:am422109;Xt_LOC100496403-like	Dr_gb:am422109;Xt_bcl6	0.0363686	0.439111	0.402742	Eukaryota	Dr_Blastula	Xt_Blastula	TRUE
Dr_zgc:174624;Xt_LOC100497179-like	Dr_zgc:174624;Xt_znf281	0.101719	0.504249	0.40253	Eukaryota	Dr_Blastula;Dr_Involuting marginal zone;Dr_Neuroectoderm;Dr_Non-neural ectoderm	Xt_Blastula;Xt_Involuting marginal zone;Xt_Neuroectoderm;Xt_Non-neural ectoderm	FALSE
Xt_crmp1;Dr_crmp1	Xt_crmp1;Dr_dpysl5a	0	0.402526	0.402526	Eukaryota	Dr_Neuron;Dr_Rohon-beard neuron	Xt_Neuron;Xt_Rohon-beard neuron	FALSE
Dr_dpysl5a;Xt_dpysl5	Dr_dpysl5a;Xt_crmp1	0	0.402526	0.402526	Eukaryota	Dr_Neuron;Dr_Rohon-beard neuron	Xt_Neuron;Xt_Rohon-beard neuron	FALSE
Xt_hba-l5;Dr_si:xx-by187g17.1	Xt_hba-l5;Dr_hbbe1.1	0.405273	0.807584	0.402311	Eukaryota	Dr_Blood	Xt_Blood	FALSE
Dr_sfrs3b;Xt_Xetrov90009871m	Dr_sfrs3b;Xt_srsf7	0	0.401378	0.401378	Eukaryota	Dr_Dorsal organizer;Dr_Endoderm;Dr_Involuting marginal zone;Dr_Neuroectoderm;Dr_Non-neural ectoderm;Dr_Notochord;Dr_Tailbud	Xt_Endoderm;Xt_Hindbrain;Xt_Involuting marginal zone;Xt_Neuroectoderm;Xt_Non-neural ectoderm;Xt_Spemann organizer	TRUE
Xt_srsf7;Dr_srsf7b	Xt_srsf7;Dr_sfrs3b	0	0.401378	0.401378	Eukaryota	Dr_Dorsal organizer;Dr_Endoderm;Dr_Involuting marginal zone;Dr_Neuroectoderm;Dr_Non-neural ectoderm;Dr_Notochord;Dr_Tailbud	Xt_Endoderm;Xt_Hindbrain;Xt_Involuting marginal zone;Xt_Neuroectoderm;Xt_Non-neural ectoderm;Xt_Spemann organizer	FALSE
Xt_etv1;Dr_etv1	Xt_etv1;Dr_etv5b	0	0.401365	0.401365	Eukaryota	Dr_Endoderm;Dr_Forebrain/midbrain;Dr_Involuting marginal zone;Dr_Neuroectoderm;Dr_Presomitic mesoderm;Dr_Tailbud	Xt_Endoderm;Xt_Involuting marginal zone;Xt_Neuroectoderm;Xt_Presomitic mesoderm;Xt_Pronephric mesenchyme;Xt_Tailbud	FALSE
Dr_zgc:174275;Xt_LOC100496561	Dr_zgc:174275;Xt_sp1	0.0119995	0.413265	0.401266	Eukaryota			TRUE
Xt_hba-l2;Dr_si:xx-by187g17.1	Xt_hba-l2;Dr_hbbe2	0.25417	0.655404	0.401234	Eukaryota	Dr_Blood	Xt_Blood	FALSE
Dr_syt9a;Xt_Xetrov90010371m	Dr_syt9a;Xt_syt4	0	0.401149	0.401149	Eukaryota			FALSE
Xt_hba1;Dr_hbz	Xt_hba1;Dr_hbbe3	0.2494	0.649916	0.400516	Eukaryota	Dr_Blood	Xt_Blood	FALSE
Dr_zgc:173703;Xt_LOC100496403-like	Dr_zgc:173703;Xt_znf518b	0.00604062	0.406179	0.400138	Eukaryota	Dr_Blastula	Xt_Blastula	TRUE
Dr_si:dkey-57k17.1;Xt_LOC100496403-like	Dr_si:dkey-57k17.1;Xt_znf281	0.00895905	0.408622	0.399662	Eukaryota	Dr_Involuting marginal zone;Dr_Neuroectoderm;Dr_Non-neural ectoderm	Xt_Involuting marginal zone;Xt_Neuroectoderm;Xt_Non-neural ectoderm	TRUE
Dr_zgc:174275;Xt_Xetrov90001667m	Dr_zgc:174275;Xt_sp1	0.0136898	0.413265	0.399576	Eukaryota			FALSE
Xt_yy1;Dr_yy1b	Xt_yy1;Dr_zic2b	0.222577	0.621946	0.399369	Eukaryota	Dr_Dorsal organizer;Dr_Involuting marginal zone;Dr_Neuroectoderm;Dr_Non-neural ectoderm	Xt_Involuting marginal zone;Xt_Neuroectoderm;Xt_Non-neural ectoderm;Xt_Spemann organizer	FALSE
Dr_gli2b;Xt_gli2	Dr_gli2b;Xt_yy1	0	0.399227	0.399227	Eukaryota			FALSE
Dr_gb:am422109;Xt_LOC100496561	Dr_gb:am422109;Xt_znf217	0	0.399207	0.399207	Eukaryota	Dr_Blastula;Dr_Neuroectoderm;Dr_Non-neural ectoderm	Xt_Blastula;Xt_Neuroectoderm;Xt_Non-neural ectoderm	TRUE
Dr_gb:am422109;Xt_LOC100493966	Dr_gb:am422109;Xt_znf217	0	0.399207	0.399207	Eukaryota	Dr_Blastula;Dr_Neuroectoderm;Dr_Non-neural ectoderm	Xt_Blastula;Xt_Neuroectoderm;Xt_Non-neural ectoderm	FALSE
Dr_gb:am422109;Xt_znf250	Dr_gb:am422109;Xt_znf217	0	0.399207	0.399207	Eukaryota	Dr_Blastula;Dr_Neuroectoderm;Dr_Non-neural ectoderm	Xt_Blastula;Xt_Neuroectoderm;Xt_Non-neural ectoderm	FALSE
Dr_gb:am422109;Xt_Xetrov90001667m	Dr_gb:am422109;Xt_znf217	0	0.399207	0.399207	Eukaryota	Dr_Blastula;Dr_Neuroectoderm;Dr_Non-neural ectoderm	Xt_Blastula;Xt_Neuroectoderm;Xt_Non-neural ectoderm	FALSE
Dr_gb:am422109;Xt_LOC101735121-like	Dr_gb:am422109;Xt_znf217	0	0.399207	0.399207	Eukaryota	Dr_Blastula;Dr_Neuroectoderm;Dr_Non-neural ectoderm	Xt_Blastula;Xt_Neuroectoderm;Xt_Non-neural ectoderm	FALSE
Dr_gb:am422109;Xt_LOC101734394	Dr_gb:am422109;Xt_znf217	0	0.399207	0.399207	Eukaryota	Dr_Blastula;Dr_Neuroectoderm;Dr_Non-neural ectoderm	Xt_Blastula;Xt_Neuroectoderm;Xt_Non-neural ectoderm	FALSE
Dr_gb:am422109;Xt_znf329	Dr_gb:am422109;Xt_znf217	0	0.399207	0.399207	Eukaryota	Dr_Blastula;Dr_Neuroectoderm;Dr_Non-neural ectoderm	Xt_Blastula;Xt_Neuroectoderm;Xt_Non-neural ectoderm	FALSE
Dr_zgc:174624;Xt_LOC100493966	Dr_zgc:174624;Xt_sp5l	0	0.398689	0.398689	Eukaryota	Dr_Blastula;Dr_Involuting marginal zone;Dr_Neuroectoderm	Xt_Blastula;Xt_Involuting marginal zone;Xt_Neuroectoderm	FALSE
Dr_zgc:174624;Xt_LOC101735121-like	Dr_zgc:174624;Xt_sp5l	0	0.398689	0.398689	Eukaryota	Dr_Blastula;Dr_Involuting marginal zone;Dr_Neuroectoderm	Xt_Blastula;Xt_Involuting marginal zone;Xt_Neuroectoderm	FALSE
Dr_zgc:174624;Xt_znf329	Dr_zgc:174624;Xt_sp5l	0	0.398689	0.398689	Eukaryota	Dr_Blastula;Dr_Involuting marginal zone;Dr_Neuroectoderm	Xt_Blastula;Xt_Involuting marginal zone;Xt_Neuroectoderm	FALSE
Dr_hoxb9a;Xt_hoxb9	Dr_hoxb9a;Xt_hoxc11	0.0703406	0.468829	0.398488	Eukaryota	Dr_Presomitic mesoderm;Dr_Tailbud	Xt_Presomitic mesoderm;Xt_Tailbud	FALSE
Xt_zbtb10;Dr_zbtb10	Xt_zbtb10;Dr_LOC101885018	0.0152839	0.413733	0.398449	Eukaryota			FALSE
Dr_zgc:173703;Xt_LOC100496403-like	Dr_zgc:173703;Xt_znf281	0.00604062	0.404482	0.398441	Eukaryota	Dr_Blastula;Dr_Neuroectoderm	Xt_Blastula;Xt_Neuroectoderm;Xt_Non-neural ectoderm	TRUE
Dr_gb:am422109;Xt_znf383	Dr_gb:am422109;Xt_bcl6	0.0408303	0.439111	0.39828	Eukaryota	Dr_Blastula	Xt_Blastula	FALSE
Xt_t;Dr_t	Xt_t;Dr_tbx6	0	0.398005	0.398005	Eukaryota	Dr_Involuting marginal zone;Dr_Presomitic mesoderm	Xt_Involuting marginal zone;Xt_Presomitic mesoderm;Xt_Tailbud	FALSE
Dr_si:dkey-57k17.1;Xt_LOC101734394	Dr_si:dkey-57k17.1;Xt_znf281	0.0107355	0.408622	0.397886	Eukaryota	Dr_Involuting marginal zone;Dr_Neuroectoderm;Dr_Non-neural ectoderm	Xt_Involuting marginal zone;Xt_Neuroectoderm;Xt_Non-neural ectoderm	FALSE
Xt_hba4;Dr_hbaa1	Xt_hba4;Dr_hbbe2	0.0692819	0.467165	0.397883	Eukaryota			FALSE
Dr_LOC570015;Xt_znf250	Dr_LOC570015;Xt_zfat	0	0.396941	0.396941	Eukaryota	Dr_Dorsal organizer;Dr_Involuting marginal zone;Dr_Neuroectoderm;Dr_Non-neural ectoderm;Dr_Notochord	Xt_Involuting marginal zone;Xt_Neuroectoderm;Xt_Non-neural ectoderm;Xt_Spemann organizer	FALSE
Dr_LOC570015;Xt_znf329	Dr_LOC570015;Xt_zfat	0	0.396941	0.396941	Eukaryota	Dr_Dorsal organizer;Dr_Involuting marginal zone;Dr_Neuroectoderm;Dr_Non-neural ectoderm;Dr_Notochord	Xt_Involuting marginal zone;Xt_Neuroectoderm;Xt_Non-neural ectoderm;Xt_Spemann organizer	FALSE
Dr_LOC570015;Xt_LOC100496403-like	Dr_LOC570015;Xt_zfat	0	0.396941	0.396941	Eukaryota	Dr_Dorsal organizer;Dr_Involuting marginal zone;Dr_Neuroectoderm;Dr_Non-neural ectoderm;Dr_Notochord	Xt_Involuting marginal zone;Xt_Neuroectoderm;Xt_Non-neural ectoderm;Xt_Spemann organizer	TRUE
Dr_LOC570015;Xt_Xetrov90015419m	Dr_LOC570015;Xt_zfat	0	0.396941	0.396941	Eukaryota	Dr_Dorsal organizer;Dr_Involuting marginal zone;Dr_Neuroectoderm;Dr_Non-neural ectoderm;Dr_Notochord	Xt_Involuting marginal zone;Xt_Neuroectoderm;Xt_Non-neural ectoderm;Xt_Spemann organizer	FALSE
Xt_zfat;Dr_zfat	Xt_zfat;Dr_LOC570015	0	0.396941	0.396941	Eukaryota	Dr_Dorsal organizer;Dr_Involuting marginal zone;Dr_Neuroectoderm;Dr_Non-neural ectoderm;Dr_Notochord	Xt_Involuting marginal zone;Xt_Neuroectoderm;Xt_Non-neural ectoderm;Xt_Spemann organizer	FALSE
Dr_LOC570015;Xt_LOC101735121-like	Dr_LOC570015;Xt_zfat	0	0.396941	0.396941	Eukaryota	Dr_Dorsal organizer;Dr_Involuting marginal zone;Dr_Neuroectoderm;Dr_Non-neural ectoderm;Dr_Notochord	Xt_Involuting marginal zone;Xt_Neuroectoderm;Xt_Non-neural ectoderm;Xt_Spemann organizer	FALSE
Dr_LOC570015;Xt_LOC100497179-like	Dr_LOC570015;Xt_zfat	0	0.396941	0.396941	Eukaryota	Dr_Dorsal organizer;Dr_Involuting marginal zone;Dr_Neuroectoderm;Dr_Non-neural ectoderm;Dr_Notochord	Xt_Involuting marginal zone;Xt_Neuroectoderm;Xt_Non-neural ectoderm;Xt_Spemann organizer	FALSE
Dr_LOC570015;Xt_Xetrov90001667m	Dr_LOC570015;Xt_zfat	0	0.396941	0.396941	Eukaryota	Dr_Dorsal organizer;Dr_Involuting marginal zone;Dr_Neuroectoderm;Dr_Non-neural ectoderm;Dr_Notochord	Xt_Involuting marginal zone;Xt_Neuroectoderm;Xt_Non-neural ectoderm;Xt_Spemann organizer	FALSE
Dr_LOC570015;Xt_Xetrov90015421m	Dr_LOC570015;Xt_zfat	0	0.396941	0.396941	Eukaryota	Dr_Dorsal organizer;Dr_Involuting marginal zone;Dr_Neuroectoderm;Dr_Non-neural ectoderm;Dr_Notochord	Xt_Involuting marginal zone;Xt_Neuroectoderm;Xt_Non-neural ectoderm;Xt_Spemann organizer	FALSE
Dr_LOC570015;Xt_LOC100493966	Dr_LOC570015;Xt_zfat	0	0.396941	0.396941	Eukaryota	Dr_Dorsal organizer;Dr_Involuting marginal zone;Dr_Neuroectoderm;Dr_Non-neural ectoderm;Dr_Notochord	Xt_Involuting marginal zone;Xt_Neuroectoderm;Xt_Non-neural ectoderm;Xt_Spemann organizer	FALSE
Dr_LOC570015;Xt_Xetrov90029323m	Dr_LOC570015;Xt_zfat	0	0.396941	0.396941	Eukaryota	Dr_Dorsal organizer;Dr_Involuting marginal zone;Dr_Neuroectoderm;Dr_Non-neural ectoderm;Dr_Notochord	Xt_Involuting marginal zone;Xt_Neuroectoderm;Xt_Non-neural ectoderm;Xt_Spemann organizer	FALSE
Dr_LOC570015;Xt_Xetrov90008367m	Dr_LOC570015;Xt_zfat	0	0.396941	0.396941	Eukaryota	Dr_Dorsal organizer;Dr_Involuting marginal zone;Dr_Neuroectoderm;Dr_Non-neural ectoderm;Dr_Notochord	Xt_Involuting marginal zone;Xt_Neuroectoderm;Xt_Non-neural ectoderm;Xt_Spemann organizer	FALSE
Dr_LOC570015;Xt_LOC100496561	Dr_LOC570015;Xt_zfat	0	0.396941	0.396941	Eukaryota	Dr_Dorsal organizer;Dr_Involuting marginal zone;Dr_Neuroectoderm;Dr_Non-neural ectoderm;Dr_Notochord	Xt_Involuting marginal zone;Xt_Neuroectoderm;Xt_Non-neural ectoderm;Xt_Spemann organizer	TRUE
Dr_LOC570015;Xt_znf383	Dr_LOC570015;Xt_zfat	0	0.396941	0.396941	Eukaryota	Dr_Dorsal organizer;Dr_Involuting marginal zone;Dr_Neuroectoderm;Dr_Non-neural ectoderm;Dr_Notochord	Xt_Involuting marginal zone;Xt_Neuroectoderm;Xt_Non-neural ectoderm;Xt_Spemann organizer	FALSE
Dr_LOC570015;Xt_LOC100495499	Dr_LOC570015;Xt_zfat	0	0.396941	0.396941	Eukaryota	Dr_Dorsal organizer;Dr_Involuting marginal zone;Dr_Neuroectoderm;Dr_Non-neural ectoderm;Dr_Notochord	Xt_Involuting marginal zone;Xt_Neuroectoderm;Xt_Non-neural ectoderm;Xt_Spemann organizer	FALSE
Dr_hoxd9a;Xt_hoxd9	Dr_hoxd9a;Xt_hoxd10	0	0.396796	0.396796	Eukaryota	Dr_Presomitic mesoderm;Dr_Tailbud	Xt_Presomitic mesoderm;Xt_Tailbud	TRUE
Dr_zgc:174624;Xt_LOC101735121-like	Dr_zgc:174624;Xt_sp1	0	0.395999	0.395999	Eukaryota			FALSE
Dr_zgc:174624;Xt_LOC100493966	Dr_zgc:174624;Xt_sp1	0	0.395999	0.395999	Eukaryota			FALSE
Dr_zgc:174624;Xt_znf329	Dr_zgc:174624;Xt_sp1	0	0.395999	0.395999	Eukaryota			FALSE
Xt_col6a1;Dr_col6a1	Xt_col6a1;Dr_col11a1a	0	0.395425	0.395425	Eukaryota	Dr_Epidermal progenitor;Dr_Placodal area	Xt_Epidermal progenitor	FALSE
Xt_hmgb3;Dr_hmgb3a	Xt_hmgb3;Dr_hmgb1a	0.103835	0.498827	0.394993	Eukaryota	Dr_Forebrain/midbrain;Dr_Hindbrain;Dr_Intermediate mesoderm;Dr_Neuroectoderm;Dr_Non-neural ectoderm;Dr_Tailbud	Xt_Eye primordium;Xt_Forebrain/midbrain;Xt_Hindbrain;Xt_Neuroectoderm;Xt_Non-neural ectoderm;Xt_Spemann organizer;Xt_Tailbud	FALSE
Dr_zgc:174275;Xt_LOC100495499	Dr_zgc:174275;Xt_znf281	0.139446	0.533807	0.39436	Eukaryota	Dr_Blastula;Dr_Involuting marginal zone;Dr_Neuroectoderm;Dr_Non-neural ectoderm	Xt_Blastula;Xt_Involuting marginal zone;Xt_Neuroectoderm;Xt_Non-neural ectoderm	FALSE
Dr_LOC570015;Xt_LOC101734394	Dr_LOC570015;Xt_zfat	0.00262063	0.396941	0.39432	Eukaryota	Dr_Dorsal organizer;Dr_Involuting marginal zone;Dr_Neuroectoderm;Dr_Non-neural ectoderm;Dr_Notochord	Xt_Involuting marginal zone;Xt_Neuroectoderm;Xt_Non-neural ectoderm;Xt_Spemann organizer	FALSE
Xt_kctd12;Dr_kctd12.1	Xt_kctd12;Dr_kctd12.2	0	0.394303	0.394303	Eukaryota	Dr_Macrophage	Xt_Myeloid progenitors	FALSE
Dr_znf1137;Xt_LOC101734394	Dr_znf1137;Xt_sp5l	0.0267137	0.420722	0.394008	Eukaryota	Dr_Blastula;Dr_Involuting marginal zone;Dr_Neuroectoderm	Xt_Blastula;Xt_Involuting marginal zone;Xt_Neuroectoderm	FALSE
Dr_zgc:173713;Xt_znf250	Dr_zgc:173713;Xt_znf518b	0	0.39368	0.39368	Eukaryota	Dr_Blastula	Xt_Blastula	FALSE
Dr_zgc:173713;Xt_LOC100496561	Dr_zgc:173713;Xt_znf518b	0	0.39368	0.39368	Eukaryota	Dr_Blastula	Xt_Blastula	TRUE
Dr_zgc:173713;Xt_Xetrov90029323m	Dr_zgc:173713;Xt_znf518b	0	0.39368	0.39368	Eukaryota	Dr_Blastula	Xt_Blastula	FALSE
Dr_zgc:173713;Xt_znf383	Dr_zgc:173713;Xt_znf518b	0	0.39368	0.39368	Eukaryota	Dr_Blastula	Xt_Blastula	FALSE
Dr_zgc:173713;Xt_Xetrov90008367m	Dr_zgc:173713;Xt_znf518b	0	0.39368	0.39368	Eukaryota	Dr_Blastula	Xt_Blastula	FALSE
Dr_zgc:173713;Xt_LOC101735121-like	Dr_zgc:173713;Xt_znf518b	0	0.39368	0.39368	Eukaryota	Dr_Blastula	Xt_Blastula	FALSE
Dr_zgc:173713;Xt_znf329	Dr_zgc:173713;Xt_znf518b	0	0.39368	0.39368	Eukaryota	Dr_Blastula	Xt_Blastula	FALSE
Dr_zgc:173713;Xt_LOC101734394	Dr_zgc:173713;Xt_znf518b	0	0.39368	0.39368	Eukaryota	Dr_Blastula	Xt_Blastula	FALSE
Dr_zgc:173713;Xt_LOC100493966	Dr_zgc:173713;Xt_znf518b	0	0.39368	0.39368	Eukaryota	Dr_Blastula	Xt_Blastula	FALSE
Dr_zgc:173713;Xt_Xetrov90001667m	Dr_zgc:173713;Xt_znf518b	0	0.39368	0.39368	Eukaryota	Dr_Blastula	Xt_Blastula	FALSE
Xt_azin1;Dr_azin1a	Xt_azin1;Dr_odc1	0.0613912	0.454926	0.393535	Eukaryota	Dr_Dorsal organizer;Dr_Eye primordium;Dr_Neuroectoderm;Dr_Non-neural ectoderm;Dr_Notochord;Dr_Tailbud	Xt_Eye primordium;Xt_Hindbrain;Xt_Neuroectoderm;Xt_Non-neural ectoderm;Xt_Spemann organizer;Xt_Tailbud	FALSE
Dr_zgc:174624;Xt_Xetrov90001667m	Dr_zgc:174624;Xt_sp5l	0.00607913	0.398689	0.39261	Eukaryota	Dr_Blastula;Dr_Involuting marginal zone;Dr_Neuroectoderm	Xt_Blastula;Xt_Involuting marginal zone;Xt_Neuroectoderm	FALSE
Dr_LOC103908654;Xt_Xetrov90029323m	Dr_LOC103908654;Xt_zfat	0.016767	0.408338	0.391571	Eukaryota	Dr_Blastula;Dr_Involuting marginal zone;Dr_Neuroectoderm;Dr_Non-neural ectoderm	Xt_Blastula;Xt_Involuting marginal zone;Xt_Neuroectoderm;Xt_Non-neural ectoderm	FALSE
Dr_erf;Xt_erf	Dr_erf;Xt_gabpa	0.022236	0.413559	0.391323	Eukaryota	Dr_Dorsal organizer;Dr_Endoderm;Dr_Intermediate mesoderm;Dr_Involuting marginal zone;Dr_Neuroectoderm;Dr_Non-neural ectoderm	Xt_Endoderm;Xt_Involuting marginal zone;Xt_Neuroectoderm;Xt_Non-neural ectoderm;Xt_Spemann organizer	FALSE
Dr_hoxa13a;Xt_hoxa13	Dr_hoxa13a;Xt_hoxd10	0	0.391023	0.391023	Eukaryota	Dr_Presomitic mesoderm	Xt_Presomitic mesoderm;Xt_Tailbud	FALSE
Xt_LOC733709;Dr_her5	Xt_LOC733709;Dr_her1	0	0.391006	0.391006	Eukaryota	Dr_Presomitic mesoderm	Xt_Presomitic mesoderm;Xt_Tailbud	FALSE
Dr_sfrs3b;Xt_LOC101732133	Dr_sfrs3b;Xt_srsf7	0.0108706	0.401378	0.390507	Eukaryota	Dr_Dorsal organizer;Dr_Endoderm;Dr_Involuting marginal zone;Dr_Neuroectoderm;Dr_Non-neural ectoderm;Dr_Notochord;Dr_Tailbud	Xt_Endoderm;Xt_Hindbrain;Xt_Involuting marginal zone;Xt_Neuroectoderm;Xt_Non-neural ectoderm;Xt_Spemann organizer	TRUE
Xt_vezf1;Dr_vezf1b	Xt_vezf1;Dr_si:ch211-198a12.6	0.0609945	0.451069	0.390074	Eukaryota	Dr_Involuting marginal zone;Dr_Neuroectoderm;Dr_Non-neural ectoderm	Xt_Involuting marginal zone;Xt_Neuroectoderm;Xt_Non-neural ectoderm	FALSE
Dr_zgc:174624;Xt_Xetrov90001667m	Dr_zgc:174624;Xt_sp1	0.00607913	0.395999	0.38992	Eukaryota			FALSE
Dr_zgc:174275;Xt_LOC101734394	Dr_zgc:174275;Xt_sp1	0.0234848	0.413265	0.389781	Eukaryota			FALSE
Dr_zgc:174275;Xt_LOC100496403-like	Dr_zgc:174275;Xt_sp1	0.0243658	0.413265	0.3889	Eukaryota			TRUE
Dr_b3gnt7l;Xt_LOC100489267	Dr_b3gnt7l;Xt_b3gnt7	0	0.388855	0.388855	Eukaryota	Dr_Notochord	Xt_Notochord	TRUE
Xt_b3gnt7;Dr_b3gnt7	Xt_b3gnt7;Dr_b3gnt7l	0	0.388855	0.388855	Eukaryota	Dr_Notochord	Xt_Notochord	FALSE
Xt_hba-l5;Dr_hbz	Xt_hba-l5;Dr_MGC173646	0.461048	0.849482	0.388434	Eukaryota	Dr_Blood	Xt_Blood	FALSE
Dr_ddx4;Xt_ddx4	Dr_ddx4;Xt_ddx3x	0.0231646	0.411536	0.388371	Eukaryota	Dr_Blastula;Dr_Dorsal organizer;Dr_Involuting marginal zone;Dr_Neuroectoderm;Dr_Non-neural ectoderm;Dr_Notochord	Xt_Blastula;Xt_Involuting marginal zone;Xt_Neuroectoderm;Xt_Non-neural ectoderm;Xt_Spemann organizer	FALSE
Dr_znf1137;Xt_LOC100496403-like	Dr_znf1137;Xt_sp5l	0.0324707	0.420722	0.388251	Eukaryota	Dr_Blastula;Dr_Involuting marginal zone;Dr_Neuroectoderm	Xt_Blastula;Xt_Involuting marginal zone;Xt_Neuroectoderm	TRUE
Dr_zgc:174624;Xt_LOC100496561	Dr_zgc:174624;Xt_sp5l	0.0105979	0.398689	0.388091	Eukaryota	Dr_Blastula;Dr_Involuting marginal zone;Dr_Neuroectoderm	Xt_Blastula;Xt_Involuting marginal zone;Xt_Neuroectoderm	TRUE
Xt_dnah1;Dr_LOC103911852	Xt_dnah1;Dr_dnah12	0.104767	0.492831	0.388064	Eukaryota			FALSE
Xt_vezf1;Dr_vezf1b	Xt_vezf1;Dr_LOC570015	0.0609945	0.44885	0.387855	Eukaryota	Dr_Dorsal organizer;Dr_Involuting marginal zone;Dr_Neuroectoderm;Dr_Non-neural ectoderm;Dr_Notochord;Dr_Tailbud	Xt_Involuting marginal zone;Xt_Neuroectoderm;Xt_Non-neural ectoderm;Xt_Spemann organizer;Xt_Tailbud	FALSE
Dr_zgc:173713;Xt_LOC100496403-like	Dr_zgc:173713;Xt_znf518b	0.00586018	0.39368	0.38782	Eukaryota	Dr_Blastula	Xt_Blastula	TRUE
Dr_hbae3;Xt_hba2	Dr_hbae3;Xt_LOC101735171	0.213042	0.600071	0.387028	Eukaryota	Dr_Blood	Xt_Blood	TRUE
Dr_rhogc;Xt_rhog-like.2	Dr_rhogc;Xt_rhoc	0.0175708	0.404556	0.386985	Eukaryota	Dr_Blastula;Dr_Neuroectoderm;Dr_Non-neural ectoderm	Xt_Blastula;Xt_Neuroectoderm;Xt_Non-neural ectoderm	TRUE
Dr_hbae3;Xt_hba2	Dr_hbae3;Xt_LOC100145107	0.213042	0.599135	0.386092	Eukaryota	Dr_Blood	Xt_Blood	TRUE
Dr_zgc:174624;Xt_LOC100496561	Dr_zgc:174624;Xt_sp1	0.0105979	0.395999	0.385401	Eukaryota			TRUE
Xt_hbz;Dr_hbz	Xt_hbz;Dr_hbbe3	0.425578	0.810858	0.38528	Eukaryota	Dr_Blood	Xt_Blood	FALSE
Dr_LOC100003496;Xt_LOC101735121-like	Dr_LOC100003496;Xt_ctcf	0	0.384477	0.384477	Eukaryota			FALSE
Dr_LOC100003496;Xt_LOC101734394	Dr_LOC100003496;Xt_ctcf	0	0.384477	0.384477	Eukaryota			FALSE
Dr_LOC100003496;Xt_LOC100495499	Dr_LOC100003496;Xt_ctcf	0	0.384477	0.384477	Eukaryota			FALSE
Dr_LOC100003496;Xt_Xetrov90008367m	Dr_LOC100003496;Xt_ctcf	0	0.384477	0.384477	Eukaryota			FALSE
Dr_LOC100003496;Xt_Xetrov90015419m	Dr_LOC100003496;Xt_ctcf	0	0.384477	0.384477	Eukaryota			FALSE
Dr_LOC100003496;Xt_znf250	Dr_LOC100003496;Xt_ctcf	0	0.384477	0.384477	Eukaryota			FALSE
Dr_LOC100003496;Xt_Xetrov90015421m	Dr_LOC100003496;Xt_ctcf	0	0.384477	0.384477	Eukaryota			FALSE
Dr_LOC100003496;Xt_znf329	Dr_LOC100003496;Xt_ctcf	0	0.384477	0.384477	Eukaryota			FALSE
Dr_LOC100003496;Xt_LOC100493966	Dr_LOC100003496;Xt_ctcf	0	0.384477	0.384477	Eukaryota			FALSE
Dr_LOC100003496;Xt_znf383	Dr_LOC100003496;Xt_ctcf	0	0.384477	0.384477	Eukaryota			FALSE
Dr_LOC100003496;Xt_Xetrov90029323m	Dr_LOC100003496;Xt_ctcf	0	0.384477	0.384477	Eukaryota			FALSE
Dr_LOC100003496;Xt_Xetrov90001667m	Dr_LOC100003496;Xt_ctcf	0	0.384477	0.384477	Eukaryota			FALSE
Dr_LOC100003496;Xt_LOC100496403-like	Dr_LOC100003496;Xt_ctcf	0	0.384477	0.384477	Eukaryota			TRUE
Dr_LOC100003496;Xt_LOC100497179-like	Dr_LOC100003496;Xt_ctcf	0	0.384477	0.384477	Eukaryota			FALSE
Dr_LOC100003496;Xt_LOC100496561	Dr_LOC100003496;Xt_ctcf	0	0.384477	0.384477	Eukaryota			TRUE
Xt_hba1;Dr_hbz	Xt_hba1;Dr_hbbe1.1	0.2494	0.633576	0.384176	Eukaryota	Dr_Blood	Xt_Blood	FALSE
Xt_hoxc4;Dr_hoxc4a	Xt_hoxc4;Dr_hoxb7a	0	0.383666	0.383666	Eukaryota	Dr_Presomitic mesoderm;Dr_Tailbud	Xt_Presomitic mesoderm;Xt_Skeletal muscle;Xt_Tailbud	FALSE
Dr_hbz;Xt_hba-l4	Dr_hbz;Xt_hbd	0.0287401	0.412372	0.383632	Eukaryota	Dr_Blood	Xt_Blood	TRUE
Xt_rbp1;Dr_si:ch211-119o8.7	Xt_rbp1;Dr_fabp7a	0	0.383427	0.383427	Eukaryota	Dr_Forebrain/midbrain;Dr_Hindbrain;Dr_Optic	Xt_Eye primordium;Xt_Forebrain/midbrain;Xt_Hindbrain;Xt_Optic	TRUE
Xt_rbp1;Dr_rbp1	Xt_rbp1;Dr_fabp7a	0	0.383427	0.383427	Eukaryota	Dr_Forebrain/midbrain;Dr_Hindbrain;Dr_Optic	Xt_Eye primordium;Xt_Forebrain/midbrain;Xt_Hindbrain;Xt_Optic	FALSE
Dr_fabp7a;Xt_LOC100495473	Dr_fabp7a;Xt_rbp1	0	0.383427	0.383427	Eukaryota	Dr_Forebrain/midbrain;Dr_Hindbrain;Dr_Optic	Xt_Eye primordium;Xt_Forebrain/midbrain;Xt_Hindbrain;Xt_Optic	FALSE
Dr_zgc:174624;Xt_LOC101734394	Dr_zgc:174624;Xt_sp5l	0.015279	0.398689	0.38341	Eukaryota	Dr_Blastula;Dr_Involuting marginal zone;Dr_Neuroectoderm	Xt_Blastula;Xt_Involuting marginal zone;Xt_Neuroectoderm	FALSE
Dr_zgc:171551;Xt_znf250	Dr_zgc:171551;Xt_ctcf	0	0.382989	0.382989	Eukaryota	Dr_Involuting marginal zone;Dr_Neuroectoderm;Dr_Non-neural ectoderm;Dr_Notochord	Xt_Involuting marginal zone;Xt_Neuroectoderm;Xt_Non-neural ectoderm;Xt_Spemann organizer	FALSE
Dr_zgc:171551;Xt_Xetrov90015419m	Dr_zgc:171551;Xt_ctcf	0	0.382989	0.382989	Eukaryota	Dr_Involuting marginal zone;Dr_Neuroectoderm;Dr_Non-neural ectoderm;Dr_Notochord	Xt_Involuting marginal zone;Xt_Neuroectoderm;Xt_Non-neural ectoderm;Xt_Spemann organizer	FALSE
Dr_zgc:171551;Xt_LOC100497179-like	Dr_zgc:171551;Xt_ctcf	0	0.382989	0.382989	Eukaryota	Dr_Involuting marginal zone;Dr_Neuroectoderm;Dr_Non-neural ectoderm;Dr_Notochord	Xt_Involuting marginal zone;Xt_Neuroectoderm;Xt_Non-neural ectoderm;Xt_Spemann organizer	FALSE
Dr_zgc:171551;Xt_LOC101734394	Dr_zgc:171551;Xt_ctcf	0	0.382989	0.382989	Eukaryota	Dr_Involuting marginal zone;Dr_Neuroectoderm;Dr_Non-neural ectoderm;Dr_Notochord	Xt_Involuting marginal zone;Xt_Neuroectoderm;Xt_Non-neural ectoderm;Xt_Spemann organizer	FALSE
Dr_zgc:171551;Xt_LOC100495499	Dr_zgc:171551;Xt_ctcf	0	0.382989	0.382989	Eukaryota	Dr_Involuting marginal zone;Dr_Neuroectoderm;Dr_Non-neural ectoderm;Dr_Notochord	Xt_Involuting marginal zone;Xt_Neuroectoderm;Xt_Non-neural ectoderm;Xt_Spemann organizer	FALSE
Dr_zgc:171551;Xt_LOC101735121-like	Dr_zgc:171551;Xt_ctcf	0	0.382989	0.382989	Eukaryota	Dr_Involuting marginal zone;Dr_Neuroectoderm;Dr_Non-neural ectoderm;Dr_Notochord	Xt_Involuting marginal zone;Xt_Neuroectoderm;Xt_Non-neural ectoderm;Xt_Spemann organizer	FALSE
Dr_zgc:171551;Xt_znf329	Dr_zgc:171551;Xt_ctcf	0	0.382989	0.382989	Eukaryota	Dr_Involuting marginal zone;Dr_Neuroectoderm;Dr_Non-neural ectoderm;Dr_Notochord	Xt_Involuting marginal zone;Xt_Neuroectoderm;Xt_Non-neural ectoderm;Xt_Spemann organizer	FALSE
Dr_zgc:171551;Xt_LOC100496561	Dr_zgc:171551;Xt_ctcf	0	0.382989	0.382989	Eukaryota	Dr_Involuting marginal zone;Dr_Neuroectoderm;Dr_Non-neural ectoderm;Dr_Notochord	Xt_Involuting marginal zone;Xt_Neuroectoderm;Xt_Non-neural ectoderm;Xt_Spemann organizer	TRUE
Dr_zgc:171551;Xt_Xetrov90008367m	Dr_zgc:171551;Xt_ctcf	0	0.382989	0.382989	Eukaryota	Dr_Involuting marginal zone;Dr_Neuroectoderm;Dr_Non-neural ectoderm;Dr_Notochord	Xt_Involuting marginal zone;Xt_Neuroectoderm;Xt_Non-neural ectoderm;Xt_Spemann organizer	FALSE
Dr_zgc:171551;Xt_Xetrov90001667m	Dr_zgc:171551;Xt_ctcf	0	0.382989	0.382989	Eukaryota	Dr_Involuting marginal zone;Dr_Neuroectoderm;Dr_Non-neural ectoderm;Dr_Notochord	Xt_Involuting marginal zone;Xt_Neuroectoderm;Xt_Non-neural ectoderm;Xt_Spemann organizer	FALSE
Dr_zgc:171551;Xt_LOC100496403-like	Dr_zgc:171551;Xt_ctcf	0	0.382989	0.382989	Eukaryota	Dr_Involuting marginal zone;Dr_Neuroectoderm;Dr_Non-neural ectoderm;Dr_Notochord	Xt_Involuting marginal zone;Xt_Neuroectoderm;Xt_Non-neural ectoderm;Xt_Spemann organizer	TRUE
Dr_zgc:171551;Xt_Xetrov90029323m	Dr_zgc:171551;Xt_ctcf	0	0.382989	0.382989	Eukaryota	Dr_Involuting marginal zone;Dr_Neuroectoderm;Dr_Non-neural ectoderm;Dr_Notochord	Xt_Involuting marginal zone;Xt_Neuroectoderm;Xt_Non-neural ectoderm;Xt_Spemann organizer	FALSE
Dr_zgc:171551;Xt_LOC100493966	Dr_zgc:171551;Xt_ctcf	0	0.382989	0.382989	Eukaryota	Dr_Involuting marginal zone;Dr_Neuroectoderm;Dr_Non-neural ectoderm;Dr_Notochord	Xt_Involuting marginal zone;Xt_Neuroectoderm;Xt_Non-neural ectoderm;Xt_Spemann organizer	FALSE
Xt_hnrnpa1;Dr_hnrnpa3	Xt_hnrnpa1;Dr_hnrnpa0a	0	0.382447	0.382447	Eukaryota			FALSE
Xt_hnrnpa1;Dr_hnrnpa1b	Xt_hnrnpa1;Dr_hnrnpa0a	0	0.382447	0.382447	Eukaryota			FALSE
Xt_hba-l5;Dr_hbz	Xt_hba-l5;Dr_si:ch211-5k11.12	0.461048	0.843407	0.382359	Eukaryota	Dr_Blood	Xt_Blood	FALSE
Dr_LOC101886587;Xt_galnt5-like	Dr_LOC101886587;Xt_galnt4	0	0.381976	0.381976	Eukaryota	Dr_Secretory epidermal	Xt_Cement gland primordium	FALSE
Xt_ralb;Dr_kras	Xt_ralb;Dr_rap1aa	0.0474232	0.429049	0.381625	Eukaryota	Dr_Dorsal organizer;Dr_Endoderm;Dr_Involuting marginal zone;Dr_Neuroectoderm;Dr_Non-neural ectoderm;Dr_Notochord	Xt_Endoderm;Xt_Involuting marginal zone;Xt_Neuroectoderm;Xt_Non-neural ectoderm;Xt_Small secretory cells;Xt_Spemann organizer	FALSE
Xt_irx5;Dr_irx5b	Xt_irx5;Dr_irx3a	0	0.381594	0.381594	Eukaryota	Dr_Notochord	Xt_Notochord	TRUE
Xt_ca2;Dr_cahz	Xt_ca2;Dr_ca15c	0	0.3809	0.3809	Eukaryota			FALSE
Dr_LOC103908654;Xt_LOC100496403-like	Dr_LOC103908654;Xt_zfat	0.0275308	0.408338	0.380807	Eukaryota	Dr_Blastula;Dr_Involuting marginal zone;Dr_Neuroectoderm;Dr_Non-neural ectoderm	Xt_Blastula;Xt_Involuting marginal zone;Xt_Neuroectoderm;Xt_Non-neural ectoderm	TRUE
Dr_zgc:174624;Xt_LOC101734394	Dr_zgc:174624;Xt_sp1	0.015279	0.395999	0.38072	Eukaryota			FALSE
Dr_si:dkey-238o14.9;Xt_Xetrov90001667m	Dr_si:dkey-238o14.9;Xt_sp5l	0	0.380414	0.380414	Eukaryota	Dr_Endoderm;Dr_Involuting marginal zone;Dr_Neuroectoderm;Dr_Tailbud	Xt_Endoderm;Xt_Involuting marginal zone;Xt_Neuroectoderm;Xt_Tailbud	FALSE
Dr_si:dkey-238o14.9;Xt_znf250	Dr_si:dkey-238o14.9;Xt_sp5l	0	0.380414	0.380414	Eukaryota	Dr_Endoderm;Dr_Involuting marginal zone;Dr_Neuroectoderm;Dr_Tailbud	Xt_Endoderm;Xt_Involuting marginal zone;Xt_Neuroectoderm;Xt_Tailbud	FALSE
Dr_si:dkey-238o14.9;Xt_LOC100493966	Dr_si:dkey-238o14.9;Xt_sp5l	0	0.380414	0.380414	Eukaryota	Dr_Endoderm;Dr_Involuting marginal zone;Dr_Neuroectoderm;Dr_Tailbud	Xt_Endoderm;Xt_Involuting marginal zone;Xt_Neuroectoderm;Xt_Tailbud	FALSE
Dr_si:dkey-238o14.9;Xt_LOC100496403-like	Dr_si:dkey-238o14.9;Xt_sp5l	0	0.380414	0.380414	Eukaryota	Dr_Endoderm;Dr_Involuting marginal zone;Dr_Neuroectoderm;Dr_Tailbud	Xt_Endoderm;Xt_Involuting marginal zone;Xt_Neuroectoderm;Xt_Tailbud	TRUE
Dr_si:dkey-238o14.9;Xt_LOC100497179-like	Dr_si:dkey-238o14.9;Xt_sp5l	0	0.380414	0.380414	Eukaryota	Dr_Endoderm;Dr_Involuting marginal zone;Dr_Neuroectoderm;Dr_Tailbud	Xt_Endoderm;Xt_Involuting marginal zone;Xt_Neuroectoderm;Xt_Tailbud	FALSE
Dr_znf1137;Xt_LOC100495499	Dr_znf1137;Xt_znf281	0.164972	0.544638	0.379665	Eukaryota	Dr_Blastula;Dr_Involuting marginal zone;Dr_Neuroectoderm;Dr_Non-neural ectoderm	Xt_Blastula;Xt_Involuting marginal zone;Xt_Neuroectoderm;Xt_Non-neural ectoderm	FALSE
Dr_rufy3;Xt_rufy3	Dr_rufy3;Xt_rundc3a	0.0880667	0.467723	0.379656	Eukaryota	Dr_Neuron;Dr_Rohon-beard neuron	Xt_Neuron;Xt_Rohon-beard neuron	FALSE
Xt_rabgap1l;Dr_rabgap1l	Xt_rabgap1l;Dr_rabgap1l2	0.111042	0.4906	0.379558	Eukaryota			FALSE
Xt_tfec;Dr_tfec	Xt_tfec;Dr_mitfa	0	0.379022	0.379022	Eukaryota			FALSE
Dr_si:dkey-238o14.9;Xt_LOC100496561	Dr_si:dkey-238o14.9;Xt_sp5l	0.00140431	0.380414	0.37901	Eukaryota	Dr_Endoderm;Dr_Involuting marginal zone;Dr_Neuroectoderm;Dr_Tailbud	Xt_Endoderm;Xt_Involuting marginal zone;Xt_Neuroectoderm;Xt_Tailbud	TRUE
Xt_hba1;Dr_hbz	Xt_hba1;Dr_si:ch211-5k11.12	0.2494	0.628301	0.378901	Eukaryota	Dr_Blood	Xt_Blood	FALSE
Dr_LOC103910469;Xt_Xetrov90015419m	Dr_LOC103910469;Xt_bcl6	0.109248	0.487935	0.378687	Eukaryota	Dr_Blastula	Xt_Blastula	FALSE
Dr_si:xx-by187g17.1;Xt_hba2	Dr_si:xx-by187g17.1;Xt_hbd	0	0.378529	0.378529	Eukaryota			TRUE
Dr_si:xx-by187g17.1;Xt_hba-l3	Dr_si:xx-by187g17.1;Xt_hbd	0	0.378529	0.378529	Eukaryota			TRUE
Dr_zgc:174624;Xt_LOC101735121-like	Dr_zgc:174624;Xt_znf217	0	0.378357	0.378357	Eukaryota	Dr_Blastula;Dr_Neuroectoderm;Dr_Non-neural ectoderm	Xt_Blastula;Xt_Neuroectoderm;Xt_Non-neural ectoderm	FALSE
Dr_zgc:174624;Xt_znf329	Dr_zgc:174624;Xt_znf217	0	0.378357	0.378357	Eukaryota	Dr_Blastula;Dr_Neuroectoderm;Dr_Non-neural ectoderm	Xt_Blastula;Xt_Neuroectoderm;Xt_Non-neural ectoderm	FALSE
Dr_zgc:174624;Xt_LOC100493966	Dr_zgc:174624;Xt_znf217	0	0.378357	0.378357	Eukaryota	Dr_Blastula;Dr_Neuroectoderm;Dr_Non-neural ectoderm	Xt_Blastula;Xt_Neuroectoderm;Xt_Non-neural ectoderm	FALSE
Xt_LOC100496216;Dr_LOC569206	Xt_LOC100496216;Dr_fhdc3	0	0.378003	0.378003	Eukaryota	Dr_Blastula	Xt_Blastula	FALSE
Xt_hbz;Dr_hbz	Xt_hbz;Dr_MGC173646	0.425578	0.803561	0.377983	Eukaryota	Dr_Blood	Xt_Blood	FALSE
Xt_hbz;Dr_si:xx-by187g17.1	Xt_hbz;Dr_zgc:163057	0.353392	0.731305	0.377912	Eukaryota	Dr_Blood	Xt_Blood	FALSE
Dr_zgc:174624;Xt_LOC100495499	Dr_zgc:174624;Xt_znf281	0.126663	0.504249	0.377586	Eukaryota	Dr_Blastula;Dr_Involuting marginal zone;Dr_Neuroectoderm;Dr_Non-neural ectoderm	Xt_Blastula;Xt_Involuting marginal zone;Xt_Neuroectoderm;Xt_Non-neural ectoderm	FALSE
Dr_zgc:174624;Xt_LOC100496403-like	Dr_zgc:174624;Xt_sp5l	0.0211449	0.398689	0.377544	Eukaryota	Dr_Blastula;Dr_Involuting marginal zone;Dr_Neuroectoderm	Xt_Blastula;Xt_Involuting marginal zone;Xt_Neuroectoderm	TRUE
Xt_hba1;Dr_si:xx-by187g17.1	Xt_hba1;Dr_zgc:163057	0.0781391	0.455607	0.377468	Eukaryota	Dr_Blood	Xt_Blood	FALSE
Xt_hba-l5;Dr_hbz	Xt_hba-l5;Dr_hbbe3	0.461048	0.837907	0.376859	Eukaryota	Dr_Blood	Xt_Blood	FALSE
Dr_LOC100001080;Xt_Xetrov90015419m	Dr_LOC100001080;Xt_ctcf	0	0.375595	0.375595	Eukaryota			FALSE
Dr_LOC100001080;Xt_znf329	Dr_LOC100001080;Xt_ctcf	0	0.375595	0.375595	Eukaryota			FALSE
Dr_LOC100001080;Xt_znf250	Dr_LOC100001080;Xt_ctcf	0	0.375595	0.375595	Eukaryota			FALSE
Dr_LOC100001080;Xt_znf383	Dr_LOC100001080;Xt_ctcf	0	0.375595	0.375595	Eukaryota			FALSE
Dr_LOC100001080;Xt_Xetrov90029323m	Dr_LOC100001080;Xt_ctcf	0	0.375595	0.375595	Eukaryota			FALSE
Dr_LOC100001080;Xt_LOC101734394	Dr_LOC100001080;Xt_ctcf	0	0.375595	0.375595	Eukaryota			FALSE
Dr_LOC100001080;Xt_LOC100497179-like	Dr_LOC100001080;Xt_ctcf	0	0.375595	0.375595	Eukaryota			FALSE
Dr_LOC100001080;Xt_Xetrov90015421m	Dr_LOC100001080;Xt_ctcf	0	0.375595	0.375595	Eukaryota			FALSE
Dr_LOC100001080;Xt_LOC100493966	Dr_LOC100001080;Xt_ctcf	0	0.375595	0.375595	Eukaryota			FALSE
Dr_LOC100001080;Xt_LOC100495499	Dr_LOC100001080;Xt_ctcf	0	0.375595	0.375595	Eukaryota			FALSE
Dr_LOC100001080;Xt_LOC100496403-like	Dr_LOC100001080;Xt_ctcf	0	0.375595	0.375595	Eukaryota			TRUE
Dr_LOC100001080;Xt_LOC100496561	Dr_LOC100001080;Xt_ctcf	0	0.375595	0.375595	Eukaryota			TRUE
Dr_LOC100001080;Xt_Xetrov90008367m	Dr_LOC100001080;Xt_ctcf	0	0.375595	0.375595	Eukaryota			FALSE
Dr_LOC100001080;Xt_Xetrov90001667m	Dr_LOC100001080;Xt_ctcf	0	0.375595	0.375595	Eukaryota			FALSE
Dr_LOC100001080;Xt_LOC101735121-like	Dr_LOC100001080;Xt_ctcf	0	0.375595	0.375595	Eukaryota			FALSE
Dr_si:dkey-57k17.1;Xt_LOC100497179-like	Dr_si:dkey-57k17.1;Xt_znf281	0.0336142	0.408622	0.375007	Eukaryota	Dr_Involuting marginal zone;Dr_Neuroectoderm;Dr_Non-neural ectoderm	Xt_Involuting marginal zone;Xt_Neuroectoderm;Xt_Non-neural ectoderm	FALSE
Dr_zgc:174624;Xt_LOC100496403-like	Dr_zgc:174624;Xt_sp1	0.0211449	0.395999	0.374855	Eukaryota			TRUE
Xt_ca12;Dr_ca12	Xt_ca12;Dr_ca15c	0	0.374851	0.374851	Eukaryota			FALSE
Dr_col14a1a;Xt_col14a1	Dr_col14a1a;Xt_LOC100486063	0.276236	0.651051	0.374815	Eukaryota	Dr_Epidermal progenitor;Dr_Lens;Dr_Placodal area	Xt_Epidermal progenitor;Xt_Lens;Xt_Placodal area	FALSE
Xt_rras;Dr_rras2	Xt_rras;Dr_rap1b	0	0.374039	0.374039	Eukaryota	Dr_Endothelial;Dr_Epidermal progenitor;Dr_Intermediate mesoderm;Dr_Placodal area	Xt_Endothelial;Xt_Epidermal progenitor;Xt_Placodal area	FALSE
Dr_zgc:173703;Xt_Xetrov90008367m	Dr_zgc:173703;Xt_znf518b	0.0322744	0.406179	0.373904	Eukaryota	Dr_Blastula	Xt_Blastula	FALSE
Xt_LOC100486867-like;Dr_si:ch211-197n1.2	Xt_LOC100486867-like;Dr_LOC103909842	0	0.373902	0.373902	Eukaryota			FALSE
Dr_ugt1b7;Xt_LOC100489505-like	Dr_ugt1b7;Xt_LOC100488176-like	0	0.373807	0.373807	Eukaryota			TRUE
Dr_ugt1b7;Xt_LOC101734295	Dr_ugt1b7;Xt_LOC100488176-like	0	0.373807	0.373807	Eukaryota			TRUE
Dr_ugt1b7;Xt_Xetrov90024081m	Dr_ugt1b7;Xt_LOC100488176-like	0	0.373807	0.373807	Eukaryota			TRUE
Xt_LOC101730842;Dr_sptbn1	Xt_LOC101730842;Dr_LOC100149084	0	0.373669	0.373669	Eukaryota	Dr_Skeletal muscle	Xt_Skeletal muscle	FALSE
Dr_LOC100149084;Xt_LOC100494783	Dr_LOC100149084;Xt_LOC101730842	0	0.373669	0.373669	Eukaryota	Dr_Skeletal muscle	Xt_Skeletal muscle	TRUE
Dr_LOC100330526;Xt_Xetrov90015419m	Dr_LOC100330526;Xt_ctcf	0	0.373479	0.373479	Eukaryota			FALSE
Dr_LOC100330526;Xt_LOC100496403-like	Dr_LOC100330526;Xt_ctcf	0	0.373479	0.373479	Eukaryota			TRUE
Dr_LOC100330526;Xt_Xetrov90008367m	Dr_LOC100330526;Xt_ctcf	0	0.373479	0.373479	Eukaryota			FALSE
Dr_LOC100330526;Xt_LOC100495499	Dr_LOC100330526;Xt_ctcf	0	0.373479	0.373479	Eukaryota			FALSE
Dr_LOC100330526;Xt_LOC100496561	Dr_LOC100330526;Xt_ctcf	0	0.373479	0.373479	Eukaryota			TRUE
Dr_LOC100330526;Xt_Xetrov90015421m	Dr_LOC100330526;Xt_ctcf	0	0.373479	0.373479	Eukaryota			FALSE
Dr_LOC100330526;Xt_LOC101735121-like	Dr_LOC100330526;Xt_ctcf	0	0.373479	0.373479	Eukaryota			FALSE
Dr_LOC100330526;Xt_znf383	Dr_LOC100330526;Xt_ctcf	0	0.373479	0.373479	Eukaryota			FALSE
Dr_LOC100330526;Xt_znf250	Dr_LOC100330526;Xt_ctcf	0	0.373479	0.373479	Eukaryota			FALSE
Dr_LOC100330526;Xt_znf329	Dr_LOC100330526;Xt_ctcf	0	0.373479	0.373479	Eukaryota			FALSE
Dr_LOC100330526;Xt_LOC100493966	Dr_LOC100330526;Xt_ctcf	0	0.373479	0.373479	Eukaryota			FALSE
Dr_LOC100330526;Xt_Xetrov90029323m	Dr_LOC100330526;Xt_ctcf	0	0.373479	0.373479	Eukaryota			FALSE
Dr_LOC100330526;Xt_LOC100497179-like	Dr_LOC100330526;Xt_ctcf	0	0.373479	0.373479	Eukaryota			FALSE
Dr_LOC100330526;Xt_Xetrov90001667m	Dr_LOC100330526;Xt_ctcf	0	0.373479	0.373479	Eukaryota			FALSE
Dr_LOC100330526;Xt_LOC101734394	Dr_LOC100330526;Xt_ctcf	0	0.373479	0.373479	Eukaryota			FALSE
Dr_zgc:174624;Xt_Xetrov90001667m	Dr_zgc:174624;Xt_znf217	0.00607913	0.378357	0.372278	Eukaryota	Dr_Blastula;Dr_Neuroectoderm;Dr_Non-neural ectoderm	Xt_Blastula;Xt_Neuroectoderm;Xt_Non-neural ectoderm	FALSE
Dr_zgc:173703;Xt_Xetrov90008367m	Dr_zgc:173703;Xt_znf281	0.0322744	0.404482	0.372208	Eukaryota	Dr_Blastula;Dr_Neuroectoderm	Xt_Blastula;Xt_Neuroectoderm;Xt_Non-neural ectoderm	FALSE
Xt_hba-l5;Dr_hbz	Xt_hba-l5;Dr_hbbe2	0.461048	0.833071	0.372023	Eukaryota	Dr_Blood	Xt_Blood	FALSE
Xt_znf281;Dr_LOC100005963	Xt_znf281;Dr_znf740a	0	0.37191	0.37191	Eukaryota	Dr_Blastula	Xt_Blastula	FALSE
Dr_LOC103908654;Xt_LOC101735121-like	Dr_LOC103908654;Xt_znf518b	0	0.371628	0.371628	Eukaryota	Dr_Blastula;Dr_Involuting marginal zone	Xt_Blastula;Xt_Involuting marginal zone	FALSE
Dr_LOC103908654;Xt_Xetrov90001667m	Dr_LOC103908654;Xt_znf518b	0	0.371628	0.371628	Eukaryota	Dr_Blastula;Dr_Involuting marginal zone	Xt_Blastula;Xt_Involuting marginal zone	FALSE
Dr_LOC103908654;Xt_LOC100496561	Dr_LOC103908654;Xt_znf518b	0	0.371628	0.371628	Eukaryota	Dr_Blastula;Dr_Involuting marginal zone	Xt_Blastula;Xt_Involuting marginal zone	TRUE
Dr_LOC103908654;Xt_LOC101734394	Dr_LOC103908654;Xt_znf518b	0	0.371628	0.371628	Eukaryota	Dr_Blastula;Dr_Involuting marginal zone	Xt_Blastula;Xt_Involuting marginal zone	FALSE
Dr_LOC103908654;Xt_znf329	Dr_LOC103908654;Xt_znf518b	0	0.371628	0.371628	Eukaryota	Dr_Blastula;Dr_Involuting marginal zone	Xt_Blastula;Xt_Involuting marginal zone	FALSE
Dr_LOC103908654;Xt_LOC100493966	Dr_LOC103908654;Xt_znf518b	0	0.371628	0.371628	Eukaryota	Dr_Blastula;Dr_Involuting marginal zone	Xt_Blastula;Xt_Involuting marginal zone	FALSE
Dr_LOC103908654;Xt_Xetrov90015421m	Dr_LOC103908654;Xt_znf518b	0	0.371628	0.371628	Eukaryota	Dr_Blastula;Dr_Involuting marginal zone	Xt_Blastula;Xt_Involuting marginal zone	FALSE
Dr_LOC103908654;Xt_znf383	Dr_LOC103908654;Xt_znf518b	0	0.371628	0.371628	Eukaryota	Dr_Blastula;Dr_Involuting marginal zone	Xt_Blastula;Xt_Involuting marginal zone	FALSE
Dr_LOC103908654;Xt_znf250	Dr_LOC103908654;Xt_znf518b	0	0.371628	0.371628	Eukaryota	Dr_Blastula;Dr_Involuting marginal zone	Xt_Blastula;Xt_Involuting marginal zone	FALSE
Dr_LOC103908654;Xt_Xetrov90008367m	Dr_LOC103908654;Xt_znf518b	0	0.371628	0.371628	Eukaryota	Dr_Blastula;Dr_Involuting marginal zone	Xt_Blastula;Xt_Involuting marginal zone	FALSE
Dr_pkp2;Xt_pkp2	Dr_pkp2;Xt_pkp3	0	0.371518	0.371518	Eukaryota	Dr_Epidermal progenitor;Dr_Ionocyte;Dr_Placodal area;Dr_Rare epidermal subtypes	Xt_Epidermal progenitor;Xt_Goblet cell;Xt_Hatching gland;Xt_Ionocyte;Xt_Small secretory cells	FALSE
Xt_pkp3;Dr_LOC100330353	Xt_pkp3;Dr_pkp2	0	0.371518	0.371518	Eukaryota	Dr_Epidermal progenitor;Dr_Ionocyte;Dr_Placodal area;Dr_Rare epidermal subtypes	Xt_Epidermal progenitor;Xt_Goblet cell;Xt_Hatching gland;Xt_Ionocyte;Xt_Small secretory cells	FALSE
Xt_hmgb3;Dr_hmgb3a	Xt_hmgb3;Dr_tox4	0.103835	0.475221	0.371386	Eukaryota			FALSE
Xt_ak7;Dr_ak7a	Xt_ak7;Dr_ak8	0.299432	0.669542	0.37011	Eukaryota			FALSE
Dr_gb:am422109;Xt_Xetrov90029323m	Dr_gb:am422109;Xt_bcl6	0.0697469	0.439111	0.369364	Eukaryota	Dr_Blastula	Xt_Blastula	FALSE
Dr_LOC103910469;Xt_LOC100497179-like	Dr_LOC103910469;Xt_bcl6	0.119253	0.487935	0.368682	Eukaryota	Dr_Blastula	Xt_Blastula	FALSE
Dr_zgc:173915;Xt_LOC101731491	Dr_zgc:173915;Xt_Xetrov90030286m	0	0.368549	0.368549	Eukaryota			FALSE
Dr_zgc:173915;Xt_LOC100488644	Dr_zgc:173915;Xt_Xetrov90030286m	0	0.368549	0.368549	Eukaryota			FALSE
Dr_zgc:173915;Xt_LOC100488329	Dr_zgc:173915;Xt_Xetrov90030286m	0	0.368549	0.368549	Eukaryota			FALSE
Dr_hoxa13b;Xt_hoxa13	Dr_hoxa13b;Xt_hoxc11	0	0.368486	0.368486	Eukaryota			FALSE
Dr_hoxb9a;Xt_hoxb9	Dr_hoxb9a;Xt_hoxa11	0.0703406	0.438349	0.368008	Eukaryota	Dr_Presomitic mesoderm	Xt_Presomitic mesoderm	FALSE
Xt_hoxc6;Dr_hoxc6a	Xt_hoxc6;Dr_hoxc3a	0	0.367972	0.367972	Eukaryota	Dr_Intermediate mesoderm;Dr_Presomitic mesoderm;Dr_Tailbud	Xt_Intermediate mesoderm;Xt_Presomitic mesoderm;Xt_Tailbud	TRUE
Dr_zgc:174624;Xt_LOC100496561	Dr_zgc:174624;Xt_znf217	0.0105979	0.378357	0.367759	Eukaryota	Dr_Blastula;Dr_Neuroectoderm;Dr_Non-neural ectoderm	Xt_Blastula;Xt_Neuroectoderm;Xt_Non-neural ectoderm	TRUE
Xt_nkx2-1;Dr_nkx2.1	Xt_nkx2-1;Dr_nkx2.2a	0.333604	0.70094	0.367337	Eukaryota	Dr_Forebrain/midbrain	Xt_Forebrain/midbrain	FALSE
Dr_tbpl2;Xt_tbpl2	Dr_tbpl2;Xt_tbpl1	0	0.366832	0.366832	Eukaryota			TRUE
Xt_rhoc;Dr_zgc:153713	Xt_rhoc;Dr_rac1a	0	0.366631	0.366631	Eukaryota	Dr_Blastula;Dr_Endoderm;Dr_Involuting marginal zone;Dr_Neuroectoderm;Dr_Non-neural ectoderm	Xt_Blastula;Xt_Endoderm;Xt_Involuting marginal zone;Xt_Neuroectoderm;Xt_Non-neural ectoderm	FALSE
Dr_rac1a;Xt_rac2	Dr_rac1a;Xt_rhoc	0	0.366631	0.366631	Eukaryota	Dr_Blastula;Dr_Endoderm;Dr_Involuting marginal zone;Dr_Neuroectoderm;Dr_Non-neural ectoderm	Xt_Blastula;Xt_Endoderm;Xt_Involuting marginal zone;Xt_Neuroectoderm;Xt_Non-neural ectoderm	FALSE
Xt_rhog-like.1;Dr_rhogb	Xt_rhog-like.1;Dr_rac1a	0	0.36661	0.36661	Eukaryota	Dr_Blastula;Dr_Involuting marginal zone	Xt_Blastula;Xt_Involuting marginal zone	FALSE
Xt_rhog-like.1;Dr_rhogd	Xt_rhog-like.1;Dr_rac1a	0	0.36661	0.36661	Eukaryota	Dr_Blastula;Dr_Involuting marginal zone	Xt_Blastula;Xt_Involuting marginal zone	FALSE
Xt_rhog-like.1;Dr_rhoga	Xt_rhog-like.1;Dr_rac1a	0	0.36661	0.36661	Eukaryota	Dr_Blastula;Dr_Involuting marginal zone	Xt_Blastula;Xt_Involuting marginal zone	FALSE
Dr_rac1a;Xt_rac2	Dr_rac1a;Xt_rhog-like.1	0	0.36661	0.36661	Eukaryota	Dr_Blastula;Dr_Involuting marginal zone	Xt_Blastula;Xt_Involuting marginal zone	FALSE
Xt_hnrnpa1;Dr_hnrnpa1b	Xt_hnrnpa1;Dr_hnrnpaba	0	0.366455	0.366455	Eukaryota			FALSE
Xt_hnrnpa1;Dr_hnrnpa3	Xt_hnrnpa1;Dr_hnrnpaba	0	0.366455	0.366455	Eukaryota			FALSE
Dr_si:ch211-202f3.3;Xt_capn14	Dr_si:ch211-202f3.3;Xt_LOC100498169	0	0.365554	0.365554	Eukaryota	Dr_Epidermal progenitor	Xt_Epidermal progenitor	TRUE
Dr_znf1137;Xt_znf329	Dr_znf1137;Xt_bcl6	0	0.365453	0.365453	Eukaryota	Dr_Blastula	Xt_Blastula	FALSE
Xt_bcl6;Dr_bcl6a	Xt_bcl6;Dr_znf1137	0	0.365453	0.365453	Eukaryota	Dr_Blastula	Xt_Blastula	FALSE
Dr_znf1137;Xt_LOC100493966	Dr_znf1137;Xt_bcl6	0	0.365453	0.365453	Eukaryota	Dr_Blastula	Xt_Blastula	FALSE
Dr_znf1137;Xt_znf250	Dr_znf1137;Xt_bcl6	0	0.365453	0.365453	Eukaryota	Dr_Blastula	Xt_Blastula	FALSE
Xt_col5a1-like;Dr_col5a1	Xt_col5a1-like;Dr_zgc:113232	0.224044	0.589481	0.365437	Eukaryota			FALSE
Dr_si:dkey-238o14.9;Xt_Xetrov90001667m	Dr_si:dkey-238o14.9;Xt_znf281	0	0.365165	0.365165	Eukaryota	Dr_Endoderm;Dr_Involuting marginal zone;Dr_Neuroectoderm;Dr_Non-neural ectoderm	Xt_Endoderm;Xt_Involuting marginal zone;Xt_Neuroectoderm;Xt_Non-neural ectoderm	FALSE
Dr_si:dkey-238o14.9;Xt_LOC100497179-like	Dr_si:dkey-238o14.9;Xt_znf281	0	0.365165	0.365165	Eukaryota	Dr_Endoderm;Dr_Involuting marginal zone;Dr_Neuroectoderm;Dr_Non-neural ectoderm	Xt_Endoderm;Xt_Involuting marginal zone;Xt_Neuroectoderm;Xt_Non-neural ectoderm	FALSE
Dr_si:dkey-238o14.9;Xt_znf250	Dr_si:dkey-238o14.9;Xt_znf281	0	0.365165	0.365165	Eukaryota	Dr_Endoderm;Dr_Involuting marginal zone;Dr_Neuroectoderm;Dr_Non-neural ectoderm	Xt_Endoderm;Xt_Involuting marginal zone;Xt_Neuroectoderm;Xt_Non-neural ectoderm	FALSE
Dr_si:dkey-238o14.9;Xt_LOC100493966	Dr_si:dkey-238o14.9;Xt_znf281	0	0.365165	0.365165	Eukaryota	Dr_Endoderm;Dr_Involuting marginal zone;Dr_Neuroectoderm;Dr_Non-neural ectoderm	Xt_Endoderm;Xt_Involuting marginal zone;Xt_Neuroectoderm;Xt_Non-neural ectoderm	FALSE
Xt_znf281;Dr_LOC100005963	Xt_znf281;Dr_si:dkey-238o14.9	0	0.365165	0.365165	Eukaryota	Dr_Endoderm;Dr_Involuting marginal zone;Dr_Neuroectoderm;Dr_Non-neural ectoderm	Xt_Endoderm;Xt_Involuting marginal zone;Xt_Neuroectoderm;Xt_Non-neural ectoderm	FALSE
Dr_si:dkey-238o14.9;Xt_LOC100496403-like	Dr_si:dkey-238o14.9;Xt_znf281	0	0.365165	0.365165	Eukaryota	Dr_Endoderm;Dr_Involuting marginal zone;Dr_Neuroectoderm;Dr_Non-neural ectoderm	Xt_Endoderm;Xt_Involuting marginal zone;Xt_Neuroectoderm;Xt_Non-neural ectoderm	TRUE
Dr_hoxa10b;Xt_hoxa10	Dr_hoxa10b;Xt_hoxc11	0.183478	0.548456	0.364978	Eukaryota	Dr_Presomitic mesoderm;Dr_Tailbud	Xt_Presomitic mesoderm;Xt_Tailbud	FALSE
Dr_zgc:113886;Xt_LOC100495499	Dr_zgc:113886;Xt_znf281	0.0608232	0.424943	0.36412	Eukaryota	Dr_Blastula	Xt_Blastula	FALSE
Dr_si:dkey-238o14.9;Xt_LOC100496561	Dr_si:dkey-238o14.9;Xt_znf281	0.00140431	0.365165	0.36376	Eukaryota	Dr_Endoderm;Dr_Involuting marginal zone;Dr_Neuroectoderm;Dr_Non-neural ectoderm	Xt_Endoderm;Xt_Involuting marginal zone;Xt_Neuroectoderm;Xt_Non-neural ectoderm	TRUE
Dr_zgc:174624;Xt_LOC101734394	Dr_zgc:174624;Xt_znf217	0.015279	0.378357	0.363078	Eukaryota	Dr_Blastula;Dr_Neuroectoderm;Dr_Non-neural ectoderm	Xt_Blastula;Xt_Neuroectoderm;Xt_Non-neural ectoderm	FALSE
Dr_gb:am422109;Xt_LOC100496403-like	Dr_gb:am422109;Xt_znf217	0.0363686	0.399207	0.362838	Eukaryota	Dr_Blastula;Dr_Neuroectoderm;Dr_Non-neural ectoderm	Xt_Blastula;Xt_Neuroectoderm;Xt_Non-neural ectoderm	TRUE
Xt_LOC100486063;Dr_col6a6	Xt_LOC100486063;Dr_col5a3b	0	0.362731	0.362731	Eukaryota	Dr_Epidermal progenitor;Dr_Placodal area	Xt_Epidermal progenitor;Xt_Placodal area	FALSE
Xt_LOC100486063;Dr_LOC100535278	Xt_LOC100486063;Dr_col5a3b	0	0.362731	0.362731	Eukaryota	Dr_Epidermal progenitor;Dr_Placodal area	Xt_Epidermal progenitor;Xt_Placodal area	FALSE
Dr_zgc:171551;Xt_znf383	Dr_zgc:171551;Xt_ctcf	0.0207115	0.382989	0.362277	Eukaryota	Dr_Involuting marginal zone;Dr_Neuroectoderm;Dr_Non-neural ectoderm;Dr_Notochord	Xt_Involuting marginal zone;Xt_Neuroectoderm;Xt_Non-neural ectoderm;Xt_Spemann organizer	FALSE
Dr_si:dkey-20l4.2;Xt_Xetrov90029323m	Dr_si:dkey-20l4.2;Xt_wiz-like	0	0.362039	0.362039	Eukaryota	Dr_Blastula	Xt_Blastula	FALSE
Dr_si:dkey-20l4.2;Xt_LOC100495499	Dr_si:dkey-20l4.2;Xt_wiz-like	0	0.362039	0.362039	Eukaryota	Dr_Blastula	Xt_Blastula	FALSE
Dr_si:dkey-20l4.2;Xt_Xetrov90008367m	Dr_si:dkey-20l4.2;Xt_wiz-like	0	0.362039	0.362039	Eukaryota	Dr_Blastula	Xt_Blastula	FALSE
Dr_si:dkey-20l4.2;Xt_LOC101735121-like	Dr_si:dkey-20l4.2;Xt_wiz-like	0	0.362039	0.362039	Eukaryota	Dr_Blastula	Xt_Blastula	FALSE
Dr_si:dkey-20l4.2;Xt_LOC100496561	Dr_si:dkey-20l4.2;Xt_wiz-like	0	0.362039	0.362039	Eukaryota	Dr_Blastula	Xt_Blastula	TRUE
Dr_si:dkey-20l4.2;Xt_LOC100497179-like	Dr_si:dkey-20l4.2;Xt_wiz-like	0	0.362039	0.362039	Eukaryota	Dr_Blastula	Xt_Blastula	FALSE
Dr_si:dkey-20l4.2;Xt_Xetrov90015421m	Dr_si:dkey-20l4.2;Xt_wiz-like	0	0.362039	0.362039	Eukaryota	Dr_Blastula	Xt_Blastula	FALSE
Dr_si:dkey-20l4.2;Xt_LOC100496403-like	Dr_si:dkey-20l4.2;Xt_wiz-like	0	0.362039	0.362039	Eukaryota	Dr_Blastula	Xt_Blastula	TRUE
Dr_si:dkey-20l4.2;Xt_Xetrov90015419m	Dr_si:dkey-20l4.2;Xt_wiz-like	0	0.362039	0.362039	Eukaryota	Dr_Blastula	Xt_Blastula	FALSE
Dr_si:dkey-20l4.2;Xt_LOC100493966	Dr_si:dkey-20l4.2;Xt_wiz-like	0	0.362039	0.362039	Eukaryota	Dr_Blastula	Xt_Blastula	FALSE
Dr_si:dkey-20l4.2;Xt_znf383	Dr_si:dkey-20l4.2;Xt_wiz-like	0	0.362039	0.362039	Eukaryota	Dr_Blastula	Xt_Blastula	FALSE
Dr_si:dkey-20l4.2;Xt_znf329	Dr_si:dkey-20l4.2;Xt_wiz-like	0	0.362039	0.362039	Eukaryota	Dr_Blastula	Xt_Blastula	FALSE
Dr_si:dkey-20l4.2;Xt_LOC101734394	Dr_si:dkey-20l4.2;Xt_wiz-like	0	0.362039	0.362039	Eukaryota	Dr_Blastula	Xt_Blastula	FALSE
Dr_si:dkey-20l4.2;Xt_Xetrov90001667m	Dr_si:dkey-20l4.2;Xt_wiz-like	0	0.362039	0.362039	Eukaryota	Dr_Blastula	Xt_Blastula	FALSE
Dr_si:dkey-20l4.2;Xt_znf250	Dr_si:dkey-20l4.2;Xt_wiz-like	0	0.362039	0.362039	Eukaryota	Dr_Blastula	Xt_Blastula	FALSE
Xt_sox9;Dr_sox9b	Xt_sox9;Dr_sox10	0	0.361968	0.361968	Eukaryota	Dr_Neural crest;Dr_Otic placode	Xt_Neural crest;Xt_Otic placode	FALSE
Xt_sox9;Dr_sox9a	Xt_sox9;Dr_sox10	0	0.361968	0.361968	Eukaryota	Dr_Neural crest;Dr_Otic placode	Xt_Neural crest;Xt_Otic placode	TRUE
Dr_alx4a;Xt_alx4	Dr_alx4a;Xt_sebox	0	0.361745	0.361745	Eukaryota	Dr_Dorsal organizer;Dr_Intermediate mesoderm;Dr_Involuting marginal zone;Dr_Notochord	Xt_Involuting marginal zone;Xt_Spemann organizer	FALSE
Xt_stx19;Dr_stx19	Xt_stx19;Dr_stx4	0	0.361273	0.361273	Eukaryota	Dr_Dorsal organizer;Dr_Neuroectoderm;Dr_Non-neural ectoderm;Dr_Notochord	Xt_Neuroectoderm;Xt_Non-neural ectoderm;Xt_Spemann organizer	FALSE
Dr_LOC100330116;Xt_znf250	Dr_LOC100330116;Xt_sp5l	0	0.361259	0.361259	Eukaryota	Dr_Blastula;Dr_Dorsal organizer;Dr_Involuting marginal zone;Dr_Neuroectoderm	Xt_Blastula;Xt_Involuting marginal zone;Xt_Neuroectoderm;Xt_Spemann organizer	FALSE
Dr_LOC100330116;Xt_LOC100496561	Dr_LOC100330116;Xt_sp5l	0	0.361259	0.361259	Eukaryota	Dr_Blastula;Dr_Dorsal organizer;Dr_Involuting marginal zone;Dr_Neuroectoderm	Xt_Blastula;Xt_Involuting marginal zone;Xt_Neuroectoderm;Xt_Spemann organizer	TRUE
Dr_LOC100330116;Xt_Xetrov90001667m	Dr_LOC100330116;Xt_sp5l	0	0.361259	0.361259	Eukaryota	Dr_Blastula;Dr_Dorsal organizer;Dr_Involuting marginal zone;Dr_Neuroectoderm	Xt_Blastula;Xt_Involuting marginal zone;Xt_Neuroectoderm;Xt_Spemann organizer	FALSE
Dr_LOC100330116;Xt_LOC100493966	Dr_LOC100330116;Xt_sp5l	0	0.361259	0.361259	Eukaryota	Dr_Blastula;Dr_Dorsal organizer;Dr_Involuting marginal zone;Dr_Neuroectoderm	Xt_Blastula;Xt_Involuting marginal zone;Xt_Neuroectoderm;Xt_Spemann organizer	FALSE
Dr_LOC100330116;Xt_LOC101735121-like	Dr_LOC100330116;Xt_sp5l	0	0.361259	0.361259	Eukaryota	Dr_Blastula;Dr_Dorsal organizer;Dr_Involuting marginal zone;Dr_Neuroectoderm	Xt_Blastula;Xt_Involuting marginal zone;Xt_Neuroectoderm;Xt_Spemann organizer	FALSE
Dr_LOC100330116;Xt_LOC101734394	Dr_LOC100330116;Xt_sp5l	0	0.361259	0.361259	Eukaryota	Dr_Blastula;Dr_Dorsal organizer;Dr_Involuting marginal zone;Dr_Neuroectoderm	Xt_Blastula;Xt_Involuting marginal zone;Xt_Neuroectoderm;Xt_Spemann organizer	FALSE
Dr_LOC100330116;Xt_znf329	Dr_LOC100330116;Xt_sp5l	0	0.361259	0.361259	Eukaryota	Dr_Blastula;Dr_Dorsal organizer;Dr_Involuting marginal zone;Dr_Neuroectoderm	Xt_Blastula;Xt_Involuting marginal zone;Xt_Neuroectoderm;Xt_Spemann organizer	FALSE
Dr_hoxa13a;Xt_hoxa13	Dr_hoxa13a;Xt_hoxc11	0	0.360985	0.360985	Eukaryota	Dr_Presomitic mesoderm	Xt_Presomitic mesoderm;Xt_Tailbud	FALSE
Dr_si:dkey-57k17.1;Xt_Xetrov90015419m	Dr_si:dkey-57k17.1;Xt_znf281	0.0480457	0.408622	0.360576	Eukaryota	Dr_Involuting marginal zone;Dr_Neuroectoderm;Dr_Non-neural ectoderm	Xt_Involuting marginal zone;Xt_Neuroectoderm;Xt_Non-neural ectoderm	FALSE
Xt_onecut1;Dr_LOC100536103	Xt_onecut1;Dr_onecutl	0	0.359809	0.359809	Eukaryota			FALSE
Dr_znf1137;Xt_LOC100496561	Dr_znf1137;Xt_bcl6	0.00565628	0.365453	0.359797	Eukaryota	Dr_Blastula	Xt_Blastula	TRUE
Xt_hba-l5;Dr_si:xx-by187g17.1	Xt_hba-l5;Dr_zgc:163057	0.405273	0.765059	0.359786	Eukaryota	Dr_Blood	Xt_Blood	FALSE
Dr_si:dkey-238o14.9;Xt_LOC101734394	Dr_si:dkey-238o14.9;Xt_sp5l	0.0210317	0.380414	0.359382	Eukaryota	Dr_Endoderm;Dr_Involuting marginal zone;Dr_Neuroectoderm;Dr_Tailbud	Xt_Endoderm;Xt_Involuting marginal zone;Xt_Neuroectoderm;Xt_Tailbud	FALSE
Xt_hbz;Dr_hbz	Xt_hbz;Dr_hbbe2	0.425578	0.784656	0.359078	Eukaryota	Dr_Blood	Xt_Blood	FALSE
Dr_pkp1b;Xt_pkp1	Dr_pkp1b;Xt_pkp3	0	0.359028	0.359028	Eukaryota	Dr_Hatching gland;Dr_Ionocyte;Dr_Rare epidermal subtypes	Xt_Goblet cell;Xt_Hatching gland;Xt_Ionocyte;Xt_Small secretory cells	TRUE
Xt_pkp3;Dr_LOC100330353	Xt_pkp3;Dr_pkp1b	0	0.359028	0.359028	Eukaryota	Dr_Hatching gland;Dr_Ionocyte;Dr_Rare epidermal subtypes	Xt_Goblet cell;Xt_Hatching gland;Xt_Ionocyte;Xt_Small secretory cells	FALSE
Xt_sash3;Dr_sash3	Xt_sash3;Dr_samsn1b	0	0.358975	0.358975	Eukaryota			FALSE
Dr_samsn1b;Xt_samsn1	Dr_samsn1b;Xt_sash3	0	0.358975	0.358975	Eukaryota			TRUE
Dr_hbae1;Xt_hba4	Dr_hbae1;Xt_hbd	0.454242	0.813204	0.358962	Eukaryota	Dr_Blood	Xt_Blood	FALSE
Dr_si:dkey-57k17.1;Xt_Xetrov90029323m	Dr_si:dkey-57k17.1;Xt_znf281	0.0497615	0.408622	0.35886	Eukaryota	Dr_Involuting marginal zone;Dr_Neuroectoderm;Dr_Non-neural ectoderm	Xt_Involuting marginal zone;Xt_Neuroectoderm;Xt_Non-neural ectoderm	FALSE
Xt_LOC100487093-like;Dr_si:ch211-197n1.2	Xt_LOC100487093-like;Dr_LOC103909842	0	0.35877	0.35877	Eukaryota			FALSE
Dr_si:dkey-57k17.1;Xt_Xetrov90008367m	Dr_si:dkey-57k17.1;Xt_znf281	0.0498584	0.408622	0.358763	Eukaryota	Dr_Involuting marginal zone;Dr_Neuroectoderm;Dr_Non-neural ectoderm	Xt_Involuting marginal zone;Xt_Neuroectoderm;Xt_Non-neural ectoderm	FALSE
Dr_gb:am422109;Xt_znf383	Dr_gb:am422109;Xt_znf217	0.0408303	0.399207	0.358377	Eukaryota	Dr_Blastula;Dr_Neuroectoderm;Dr_Non-neural ectoderm	Xt_Blastula;Xt_Neuroectoderm;Xt_Non-neural ectoderm	FALSE
Xt_zbtb10;Dr_zbtb10	Xt_zbtb10;Dr_si:rp71-1g18.1	0.0152839	0.373363	0.358079	Eukaryota	Dr_Blastula;Dr_Neuroectoderm	Xt_Blastula;Xt_Non-neural ectoderm	FALSE
Dr_LOC100330116;Xt_LOC100496403-like	Dr_LOC100330116;Xt_sp5l	0.00376473	0.361259	0.357494	Eukaryota	Dr_Blastula;Dr_Dorsal organizer;Dr_Involuting marginal zone;Dr_Neuroectoderm	Xt_Blastula;Xt_Involuting marginal zone;Xt_Neuroectoderm;Xt_Spemann organizer	TRUE
Dr_zgc:174624;Xt_LOC100496403-like	Dr_zgc:174624;Xt_znf217	0.0211449	0.378357	0.357212	Eukaryota	Dr_Blastula;Dr_Neuroectoderm;Dr_Non-neural ectoderm	Xt_Blastula;Xt_Neuroectoderm;Xt_Non-neural ectoderm	TRUE
Dr_si:dkey-238o14.9;Xt_LOC101735121-like	Dr_si:dkey-238o14.9;Xt_sp5l	0.0232382	0.380414	0.357176	Eukaryota	Dr_Endoderm;Dr_Involuting marginal zone;Dr_Neuroectoderm;Dr_Tailbud	Xt_Endoderm;Xt_Involuting marginal zone;Xt_Neuroectoderm;Xt_Tailbud	FALSE
Xt_hbz;Dr_hbz	Xt_hbz;Dr_hbbe1.1	0.425578	0.782569	0.356991	Eukaryota	Dr_Blood	Xt_Blood	FALSE
Dr_tagln2;Xt_tagln	Dr_tagln2;Xt_cnn1	0	0.356712	0.356712	Eukaryota	Dr_Endothelial;Dr_Epidermal progenitor;Dr_Ionocyte;Dr_Non-neural ectoderm;Dr_Notoplate;Dr_Placodal area;Dr_Rare epidermal subtypes	Xt_Endothelial;Xt_Epidermal progenitor;Xt_Goblet cell;Xt_Ionocyte;Xt_Non-neural ectoderm;Xt_Notoplate;Xt_Placodal area	FALSE
Dr_hoxc9a;Xt_hoxc9	Dr_hoxc9a;Xt_hoxc11	0.145358	0.50199	0.356631	Eukaryota	Dr_Presomitic mesoderm;Dr_Tailbud	Xt_Presomitic mesoderm;Xt_Tailbud	FALSE
Xt_meox2;Dr_meox2	Xt_meox2;Dr_hoxc6b	0	0.355983	0.355983	Eukaryota	Dr_Presomitic mesoderm	Xt_Presomitic mesoderm	FALSE
Xt_zic1;Dr_LOC103910057	Xt_zic1;Dr_zgc:153115	0	0.355681	0.355681	Eukaryota	Dr_Neuroectoderm;Dr_Tailbud	Xt_Hindbrain;Xt_Neuroectoderm	TRUE
Dr_ube2na;Xt_ube2n	Dr_ube2na;Xt_ube2e3	0	0.35554	0.35554	Eukaryota			FALSE
Xt_ube2e3;Dr_ube2e2	Xt_ube2e3;Dr_ube2na	0	0.35554	0.35554	Eukaryota			FALSE
Dr_sumo3a;Xt_sumo2	Dr_sumo3a;Xt_sumo1	0.1266	0.481988	0.355388	Eukaryota	Dr_Dorsal organizer;Dr_Endoderm;Dr_Involuting marginal zone;Dr_Neuroectoderm;Dr_Non-neural ectoderm;Dr_Notochord;Dr_Tailbud	Xt_Endoderm;Xt_Hindbrain;Xt_Involuting marginal zone;Xt_Neuroectoderm;Xt_Non-neural ectoderm;Xt_Spemann organizer;Xt_Tailbud	FALSE
Xt_rap2c;Dr_rap2ab	Xt_rap2c;Dr_rras	0	0.355013	0.355013	Eukaryota			TRUE
Dr_LOC103908654;Xt_Xetrov90029323m	Dr_LOC103908654;Xt_znf518b	0.016767	0.371628	0.354861	Eukaryota	Dr_Blastula;Dr_Involuting marginal zone	Xt_Blastula;Xt_Involuting marginal zone	FALSE
Xt_rala;Dr_ralaa	Xt_rala;Dr_rras	0	0.354853	0.354853	Eukaryota			FALSE
Xt_rala;Dr_ralab	Xt_rala;Dr_rras	0	0.354853	0.354853	Eukaryota			FALSE
Dr_znf1137;Xt_LOC101735121-like	Dr_znf1137;Xt_bcl6	0.0108699	0.365453	0.354584	Eukaryota	Dr_Blastula	Xt_Blastula	FALSE
Dr_si:ch211-208m1.2;Xt_klf8	Dr_si:ch211-208m1.2;Xt_sp3	0.0199356	0.374227	0.354291	Eukaryota			FALSE
Dr_LOC100330116;Xt_Xetrov90029323m	Dr_LOC100330116;Xt_sp5l	0.00699935	0.361259	0.35426	Eukaryota	Dr_Blastula;Dr_Dorsal organizer;Dr_Involuting marginal zone;Dr_Neuroectoderm	Xt_Blastula;Xt_Involuting marginal zone;Xt_Neuroectoderm;Xt_Spemann organizer	FALSE
Dr_zgc:173703;Xt_LOC100497179-like	Dr_zgc:173703;Xt_znf518b	0.0520524	0.406179	0.354126	Eukaryota	Dr_Blastula	Xt_Blastula	FALSE
Xt_rap2c;Dr_rap2ab	Xt_rap2c;Dr_nras	0	0.354052	0.354052	Eukaryota			TRUE
Xt_wiz-like;Dr_si:ch211-194b1.1	Xt_wiz-like;Dr_si:dkey-20l4.2	0.00820496	0.362039	0.353834	Eukaryota	Dr_Blastula	Xt_Blastula	FALSE
Xt_fzd8;Dr_fzd5	Xt_fzd8;Dr_frzb	0	0.353015	0.353015	Eukaryota	Dr_Dorsal organizer;Dr_Notochord	Xt_Spemann organizer	FALSE
Dr_frzb;Xt_sfrp4	Dr_frzb;Xt_fzd8	0	0.353015	0.353015	Eukaryota	Dr_Dorsal organizer;Dr_Notochord	Xt_Spemann organizer	TRUE
Dr_zgc:173703;Xt_LOC100497179-like	Dr_zgc:173703;Xt_znf281	0.0520524	0.404482	0.35243	Eukaryota	Dr_Blastula;Dr_Neuroectoderm	Xt_Blastula;Xt_Neuroectoderm;Xt_Non-neural ectoderm	FALSE
Dr_vdac3;Xt_vdac3	Dr_vdac3;Xt_vdac1	0.0727722	0.425174	0.352402	Eukaryota	Dr_Neuron;Dr_Optic;Dr_Presomitic mesoderm;Dr_Rohon-beard neuron;Dr_Skeletal muscle	Xt_Neuron;Xt_Optic;Xt_Rohon-beard neuron;Xt_Skeletal muscle	FALSE
Dr_hoxc13b;Xt_hoxc13	Dr_hoxc13b;Xt_hoxc10	0.225133	0.577513	0.352379	Eukaryota	Dr_Presomitic mesoderm	Xt_Presomitic mesoderm;Xt_Skeletal muscle;Xt_Tailbud	FALSE
Dr_hoxc9a;Xt_hoxc9	Dr_hoxc9a;Xt_hoxd11	0.145358	0.497485	0.352127	Eukaryota	Dr_Presomitic mesoderm;Dr_Tailbud	Xt_Presomitic mesoderm;Xt_Tailbud	FALSE
Dr_si:xx-by187g17.1;Xt_hba-l4	Dr_si:xx-by187g17.1;Xt_hbd	0.0264801	0.378529	0.352049	Eukaryota			TRUE
Xt_cygb;Dr_cygb2	Xt_cygb;Dr_si:ch211-5k11.2	0	0.351424	0.351424	Eukaryota	Dr_Blood	Xt_Blood	FALSE
Dr_LOC103909555;Xt_LOC101731491	Dr_LOC103909555;Xt_fgl2	0	0.351223	0.351223	Eukaryota			TRUE
Xt_fgl2;Dr_si:ch211-236c15.2	Xt_fgl2;Dr_LOC103909555	0	0.351223	0.351223	Eukaryota			FALSE
Dr_LOC103909555;Xt_LOC100488644	Dr_LOC103909555;Xt_fgl2	0	0.351223	0.351223	Eukaryota			TRUE
Xt_fgl2;Dr_fgl2a	Xt_fgl2;Dr_LOC103909555	0	0.351223	0.351223	Eukaryota			FALSE
Dr_LOC103909555;Xt_LOC100488329	Dr_LOC103909555;Xt_fgl2	0	0.351223	0.351223	Eukaryota			TRUE
Xt_hba-l2;Dr_hbz	Xt_hba-l2;Dr_hbbe3	0.347894	0.699084	0.351189	Eukaryota	Dr_Blood	Xt_Blood	FALSE
Dr_foxd5;Xt_foxd4l1.2	Dr_foxd5;Xt_foxi4.2	0	0.350936	0.350936	Eukaryota	Dr_Neuroectoderm;Dr_Non-neural ectoderm	Xt_Neuroectoderm;Xt_Non-neural ectoderm	TRUE
Xt_col6a1;Dr_col6a1	Xt_col6a1;Dr_col5a1	0	0.35087	0.35087	Eukaryota	Dr_Epidermal progenitor;Dr_Placodal area	Xt_Epidermal progenitor	FALSE
Dr_si:dkey-238o14.9;Xt_LOC100495499	Dr_si:dkey-238o14.9;Xt_sp5l	0.0296847	0.380414	0.350729	Eukaryota	Dr_Endoderm;Dr_Involuting marginal zone;Dr_Neuroectoderm;Dr_Tailbud	Xt_Endoderm;Xt_Involuting marginal zone;Xt_Neuroectoderm;Xt_Tailbud	FALSE
Dr_znf1137;Xt_znf383	Dr_znf1137;Xt_sp1	0.0917356	0.441441	0.349705	Eukaryota			FALSE
Dr_znf1137;Xt_Xetrov90001667m	Dr_znf1137;Xt_bcl6	0.0158436	0.365453	0.34961	Eukaryota	Dr_Blastula	Xt_Blastula	FALSE
Dr_gb:am422109;Xt_LOC100493966	Dr_gb:am422109;Xt_sp5l	0	0.349435	0.349435	Eukaryota	Dr_Blastula;Dr_Involuting marginal zone;Dr_Neuroectoderm	Xt_Blastula;Xt_Involuting marginal zone;Xt_Neuroectoderm	FALSE
Dr_gb:am422109;Xt_znf329	Dr_gb:am422109;Xt_sp5l	0	0.349435	0.349435	Eukaryota	Dr_Blastula;Dr_Involuting marginal zone;Dr_Neuroectoderm	Xt_Blastula;Xt_Involuting marginal zone;Xt_Neuroectoderm	FALSE
Dr_gb:am422109;Xt_LOC100496561	Dr_gb:am422109;Xt_sp5l	0	0.349435	0.349435	Eukaryota	Dr_Blastula;Dr_Involuting marginal zone;Dr_Neuroectoderm	Xt_Blastula;Xt_Involuting marginal zone;Xt_Neuroectoderm	TRUE
Dr_gb:am422109;Xt_LOC101735121-like	Dr_gb:am422109;Xt_sp5l	0	0.349435	0.349435	Eukaryota	Dr_Blastula;Dr_Involuting marginal zone;Dr_Neuroectoderm	Xt_Blastula;Xt_Involuting marginal zone;Xt_Neuroectoderm	FALSE
Dr_gb:am422109;Xt_LOC101734394	Dr_gb:am422109;Xt_sp5l	0	0.349435	0.349435	Eukaryota	Dr_Blastula;Dr_Involuting marginal zone;Dr_Neuroectoderm	Xt_Blastula;Xt_Involuting marginal zone;Xt_Neuroectoderm	FALSE
Dr_gb:am422109;Xt_znf250	Dr_gb:am422109;Xt_sp5l	0	0.349435	0.349435	Eukaryota	Dr_Blastula;Dr_Involuting marginal zone;Dr_Neuroectoderm	Xt_Blastula;Xt_Involuting marginal zone;Xt_Neuroectoderm	FALSE
Dr_gb:am422109;Xt_Xetrov90001667m	Dr_gb:am422109;Xt_sp5l	0	0.349435	0.349435	Eukaryota	Dr_Blastula;Dr_Involuting marginal zone;Dr_Neuroectoderm	Xt_Blastula;Xt_Involuting marginal zone;Xt_Neuroectoderm	FALSE
Xt_cygb;Dr_cygb2	Xt_cygb;Dr_LOC100334599	0	0.349283	0.349283	Eukaryota	Dr_Blood	Xt_Blood	FALSE
Dr_LOC100330116;Xt_LOC100497179-like	Dr_LOC100330116;Xt_sp5l	0.0120257	0.361259	0.349233	Eukaryota	Dr_Blastula;Dr_Dorsal organizer;Dr_Involuting marginal zone;Dr_Neuroectoderm	Xt_Blastula;Xt_Involuting marginal zone;Xt_Neuroectoderm;Xt_Spemann organizer	FALSE
Dr_LOC100330116;Xt_znf383	Dr_LOC100330116;Xt_sp5l	0.0127809	0.361259	0.348478	Eukaryota	Dr_Blastula;Dr_Dorsal organizer;Dr_Involuting marginal zone;Dr_Neuroectoderm	Xt_Blastula;Xt_Involuting marginal zone;Xt_Neuroectoderm;Xt_Spemann organizer	FALSE
Dr_fzd8a;Xt_fzd5	Dr_fzd8a;Xt_frzb2	0	0.348357	0.348357	Eukaryota	Dr_Dorsal organizer;Dr_Endoderm;Dr_Forebrain/midbrain;Dr_Intermediate mesoderm	Xt_Endoderm;Xt_Endothelial;Xt_Pronephric mesenchyme;Xt_Spemann organizer	TRUE
Xt_frzb2;Dr_LOC101884738	Xt_frzb2;Dr_fzd8a	0	0.348357	0.348357	Eukaryota	Dr_Dorsal organizer;Dr_Endoderm;Dr_Forebrain/midbrain;Dr_Intermediate mesoderm	Xt_Endoderm;Xt_Endothelial;Xt_Pronephric mesenchyme;Xt_Spemann organizer	FALSE
Dr_cxcr3.2;Xt_cxcr3	Dr_cxcr3.2;Xt_gpr65	0.0488739	0.397083	0.348209	Eukaryota			FALSE
Xt_hba1;Dr_hbz	Xt_hba1;Dr_MGC173646	0.2494	0.59729	0.34789	Eukaryota	Dr_Blood	Xt_Blood	FALSE
Dr_foxd1;Xt_foxd2	Dr_foxd1;Xt_foxd1	0	0.347695	0.347695	Eukaryota	Dr_Intermediate mesoderm	Xt_Endothelial	FALSE
Dr_si:dkey-57k17.1;Xt_Xetrov90001667m	Dr_si:dkey-57k17.1;Xt_sp5l	0	0.347692	0.347692	Eukaryota	Dr_Involuting marginal zone;Dr_Neuroectoderm	Xt_Involuting marginal zone;Xt_Neuroectoderm	FALSE
Dr_si:dkey-57k17.1;Xt_znf329	Dr_si:dkey-57k17.1;Xt_sp5l	0	0.347692	0.347692	Eukaryota	Dr_Involuting marginal zone;Dr_Neuroectoderm	Xt_Involuting marginal zone;Xt_Neuroectoderm	FALSE
Dr_si:dkey-57k17.1;Xt_LOC100493966	Dr_si:dkey-57k17.1;Xt_sp5l	0	0.347692	0.347692	Eukaryota	Dr_Involuting marginal zone;Dr_Neuroectoderm	Xt_Involuting marginal zone;Xt_Neuroectoderm	FALSE
Dr_si:dkey-57k17.1;Xt_LOC101735121-like	Dr_si:dkey-57k17.1;Xt_sp5l	0	0.347692	0.347692	Eukaryota	Dr_Involuting marginal zone;Dr_Neuroectoderm	Xt_Involuting marginal zone;Xt_Neuroectoderm	FALSE
Dr_si:dkey-57k17.1;Xt_znf383	Dr_si:dkey-57k17.1;Xt_znf281	0.060951	0.408622	0.347671	Eukaryota	Dr_Involuting marginal zone;Dr_Neuroectoderm;Dr_Non-neural ectoderm	Xt_Involuting marginal zone;Xt_Neuroectoderm;Xt_Non-neural ectoderm	FALSE
Dr_LOC103908654;Xt_LOC100497179-like	Dr_LOC103908654;Xt_zfat	0.0608449	0.408338	0.347493	Eukaryota	Dr_Blastula;Dr_Involuting marginal zone;Dr_Neuroectoderm;Dr_Non-neural ectoderm	Xt_Blastula;Xt_Involuting marginal zone;Xt_Neuroectoderm;Xt_Non-neural ectoderm	FALSE
Dr_zgc:174275;Xt_Xetrov90008367m	Dr_zgc:174275;Xt_sp5l	0.0885381	0.435584	0.347046	Eukaryota	Dr_Blastula;Dr_Involuting marginal zone;Dr_Neuroectoderm	Xt_Blastula;Xt_Involuting marginal zone;Xt_Neuroectoderm	FALSE
Dr_fzd8a;Xt_fzd5	Dr_fzd8a;Xt_frzb	0	0.34678	0.34678	Eukaryota	Dr_Dorsal organizer;Dr_Endoderm;Dr_Intermediate mesoderm	Xt_Endoderm;Xt_Spemann organizer	TRUE
Dr_si:dkey-57k17.1;Xt_LOC100495499	Dr_si:dkey-57k17.1;Xt_znf281	0.0619004	0.408622	0.346721	Eukaryota	Dr_Involuting marginal zone;Dr_Neuroectoderm;Dr_Non-neural ectoderm	Xt_Involuting marginal zone;Xt_Neuroectoderm;Xt_Non-neural ectoderm	FALSE
Xt_hba-l5;Dr_hbz	Xt_hba-l5;Dr_hbbe1.1	0.461048	0.807584	0.346536	Eukaryota	Dr_Blood	Xt_Blood	FALSE
Xt_hba3;Dr_hbz	Xt_hba3;Dr_zgc:163057	0.551778	0.898187	0.346409	Eukaryota	Dr_Blood	Xt_Blood	FALSE
Dr_zgc:174275;Xt_Xetrov90029323m	Dr_zgc:174275;Xt_sp5l	0.0892534	0.435584	0.346331	Eukaryota	Dr_Blastula;Dr_Involuting marginal zone;Dr_Neuroectoderm	Xt_Blastula;Xt_Involuting marginal zone;Xt_Neuroectoderm	FALSE
Xt_ube2e3;Dr_ube2e3	Xt_ube2e3;Dr_ube2na	0.00935975	0.35554	0.34618	Eukaryota			FALSE
Dr_si:ch211-132b12.8;Xt_cntd2	Dr_si:ch211-132b12.8;Xt_ccnb2	0.336913	0.682838	0.345925	Eukaryota	Dr_Blastula	Xt_Blastula	FALSE
Xt_rala;Dr_ralab	Xt_rala;Dr_nras	0	0.345861	0.345861	Eukaryota			FALSE
Xt_rala;Dr_ralaa	Xt_rala;Dr_nras	0	0.345861	0.345861	Eukaryota			FALSE
Xt_tspan1;Dr_LOC103911252	Xt_tspan1;Dr_cd82b	0	0.345841	0.345841	Eukaryota	Dr_Blastula	Xt_Blastula	TRUE
Xt_tspan1;Dr_tspan1	Xt_tspan1;Dr_cd82b	0	0.345841	0.345841	Eukaryota	Dr_Blastula	Xt_Blastula	TRUE
Xt_tspan1;Dr_tspan35	Xt_tspan1;Dr_cd82b	0	0.345841	0.345841	Eukaryota	Dr_Blastula	Xt_Blastula	FALSE
Dr_si:dkeyp-87a6.1;Xt_Xetrov90014133m	Dr_si:dkeyp-87a6.1;Xt_dnah1	0.219003	0.564583	0.34558	Eukaryota			FALSE
Dr_LOC103910469;Xt_LOC101734394	Dr_LOC103910469;Xt_znf281	0	0.345506	0.345506	Eukaryota	Dr_Blastula	Xt_Blastula	FALSE
Dr_LOC103910469;Xt_znf250	Dr_LOC103910469;Xt_znf281	0	0.345506	0.345506	Eukaryota	Dr_Blastula	Xt_Blastula	FALSE
Dr_LOC103910469;Xt_znf329	Dr_LOC103910469;Xt_znf281	0	0.345506	0.345506	Eukaryota	Dr_Blastula	Xt_Blastula	FALSE
Dr_LOC103910469;Xt_Xetrov90029323m	Dr_LOC103910469;Xt_znf281	0	0.345506	0.345506	Eukaryota	Dr_Blastula	Xt_Blastula	FALSE
Xt_znf281;Dr_LOC100005963	Xt_znf281;Dr_LOC103910469	0	0.345506	0.345506	Eukaryota	Dr_Blastula	Xt_Blastula	FALSE
Dr_LOC103910469;Xt_LOC101735121-like	Dr_LOC103910469;Xt_znf281	0	0.345506	0.345506	Eukaryota	Dr_Blastula	Xt_Blastula	FALSE
Dr_LOC103910469;Xt_Xetrov90001667m	Dr_LOC103910469;Xt_znf281	0	0.345506	0.345506	Eukaryota	Dr_Blastula	Xt_Blastula	FALSE
Dr_LOC103910469;Xt_LOC100493966	Dr_LOC103910469;Xt_znf281	0	0.345506	0.345506	Eukaryota	Dr_Blastula	Xt_Blastula	FALSE
Dr_LOC103910469;Xt_znf383	Dr_LOC103910469;Xt_znf281	0	0.345506	0.345506	Eukaryota	Dr_Blastula	Xt_Blastula	FALSE
Dr_LOC103910469;Xt_LOC100496561	Dr_LOC103910469;Xt_znf281	0	0.345506	0.345506	Eukaryota	Dr_Blastula	Xt_Blastula	TRUE
Dr_her5;Xt_LOC733709	Dr_her5;Xt_hes7.1	0	0.345395	0.345395	Eukaryota	Dr_Blastula	Xt_Blastula	FALSE
Dr_her5;Xt_hes7.2	Dr_her5;Xt_hes7.1	0	0.345395	0.345395	Eukaryota	Dr_Blastula	Xt_Blastula	FALSE
Xt_hes7.1;Dr_her7	Xt_hes7.1;Dr_her5	0	0.345395	0.345395	Eukaryota	Dr_Blastula	Xt_Blastula	FALSE
Dr_sfrs3a;Xt_Xetrov90009871m	Dr_sfrs3a;Xt_srsf7	0	0.34539	0.34539	Eukaryota	Dr_Dorsal organizer;Dr_Endoderm;Dr_Intermediate mesoderm;Dr_Involuting marginal zone;Dr_Neuroectoderm;Dr_Non-neural ectoderm;Dr_Notochord;Dr_Tailbud	Xt_Endoderm;Xt_Hindbrain;Xt_Involuting marginal zone;Xt_Neuroectoderm;Xt_Non-neural ectoderm;Xt_Spemann organizer	TRUE
Xt_srsf7;Dr_srsf7b	Xt_srsf7;Dr_sfrs3a	0	0.34539	0.34539	Eukaryota	Dr_Dorsal organizer;Dr_Endoderm;Dr_Intermediate mesoderm;Dr_Involuting marginal zone;Dr_Neuroectoderm;Dr_Non-neural ectoderm;Dr_Notochord;Dr_Tailbud	Xt_Endoderm;Xt_Hindbrain;Xt_Involuting marginal zone;Xt_Neuroectoderm;Xt_Non-neural ectoderm;Xt_Spemann organizer	FALSE
Dr_sfrs3a;Xt_LOC101732133	Dr_sfrs3a;Xt_srsf7	0	0.34539	0.34539	Eukaryota	Dr_Dorsal organizer;Dr_Endoderm;Dr_Intermediate mesoderm;Dr_Involuting marginal zone;Dr_Neuroectoderm;Dr_Non-neural ectoderm;Dr_Notochord;Dr_Tailbud	Xt_Endoderm;Xt_Hindbrain;Xt_Involuting marginal zone;Xt_Neuroectoderm;Xt_Non-neural ectoderm;Xt_Spemann organizer	TRUE
Xt_LOC100486063;Dr_LOC100535278	Xt_LOC100486063;Dr_col5a1	0	0.345267	0.345267	Eukaryota	Dr_Epidermal progenitor;Dr_Placodal area	Xt_Epidermal progenitor;Xt_Placodal area	FALSE
Xt_LOC100486063;Dr_col6a6	Xt_LOC100486063;Dr_col5a1	0	0.345267	0.345267	Eukaryota	Dr_Epidermal progenitor;Dr_Placodal area	Xt_Epidermal progenitor;Xt_Placodal area	FALSE
Dr_gb:am422109;Xt_Xetrov90008367m	Dr_gb:am422109;Xt_bcl6	0.0940096	0.439111	0.345101	Eukaryota	Dr_Blastula	Xt_Blastula	FALSE
Dr_dlx6a;Xt_dlx6	Dr_dlx6a;Xt_dlx2	0	0.344933	0.344933	Eukaryota			FALSE
Dr_anxa1a;Xt_anxa1-like.2	Dr_anxa1a;Xt_anxa2	0	0.34489	0.34489	Eukaryota	Dr_Epidermal progenitor;Dr_Placodal area	Xt_Epidermal progenitor;Xt_Placodal area	FALSE
Dr_anxa1a;Xt_anxa8	Dr_anxa1a;Xt_anxa2	0	0.34489	0.34489	Eukaryota	Dr_Epidermal progenitor;Dr_Placodal area	Xt_Epidermal progenitor;Xt_Placodal area	FALSE
Xt_hba4;Dr_si:xx-by187g17.1	Xt_hba4;Dr_hbbe3	0.159909	0.504607	0.344698	Eukaryota			FALSE
Xt_hoxc4;Dr_hoxc4a	Xt_hoxc4;Dr_meox1	0	0.344595	0.344595	Eukaryota	Dr_Intermediate mesoderm;Dr_Presomitic mesoderm	Xt_Intermediate mesoderm;Xt_Presomitic mesoderm;Xt_Skeletal muscle;Xt_Tailbud	FALSE
Xt_hba4;Dr_si:ch211-5k11.6	Xt_hba4;Dr_zgc:163057	0	0.34448	0.34448	Eukaryota			TRUE
Dr_si:dkey-238o14.9;Xt_LOC101734394	Dr_si:dkey-238o14.9;Xt_znf281	0.0210317	0.365165	0.344133	Eukaryota	Dr_Endoderm;Dr_Involuting marginal zone;Dr_Neuroectoderm;Dr_Non-neural ectoderm	Xt_Endoderm;Xt_Involuting marginal zone;Xt_Neuroectoderm;Xt_Non-neural ectoderm	FALSE
Dr_LOC103908654;Xt_LOC100496403-like	Dr_LOC103908654;Xt_znf518b	0.0275308	0.371628	0.344098	Eukaryota	Dr_Blastula;Dr_Involuting marginal zone	Xt_Blastula;Xt_Involuting marginal zone	TRUE
Dr_srsf3a;Xt_Xetrov90009871m	Dr_srsf3a;Xt_srsf7	0	0.343587	0.343587	Eukaryota	Dr_Dorsal organizer;Dr_Endoderm;Dr_Intermediate mesoderm;Dr_Involuting marginal zone;Dr_Neuroectoderm;Dr_Non-neural ectoderm;Dr_Notochord;Dr_Tailbud	Xt_Endoderm;Xt_Hindbrain;Xt_Involuting marginal zone;Xt_Neuroectoderm;Xt_Non-neural ectoderm;Xt_Spemann organizer	TRUE
Xt_srsf7;Dr_srsf7b	Xt_srsf7;Dr_srsf3a	0	0.343587	0.343587	Eukaryota	Dr_Dorsal organizer;Dr_Endoderm;Dr_Intermediate mesoderm;Dr_Involuting marginal zone;Dr_Neuroectoderm;Dr_Non-neural ectoderm;Dr_Notochord;Dr_Tailbud	Xt_Endoderm;Xt_Hindbrain;Xt_Involuting marginal zone;Xt_Neuroectoderm;Xt_Non-neural ectoderm;Xt_Spemann organizer	FALSE
Dr_srsf3a;Xt_LOC101732133	Dr_srsf3a;Xt_srsf7	0	0.343587	0.343587	Eukaryota	Dr_Dorsal organizer;Dr_Endoderm;Dr_Intermediate mesoderm;Dr_Involuting marginal zone;Dr_Neuroectoderm;Dr_Non-neural ectoderm;Dr_Notochord;Dr_Tailbud	Xt_Endoderm;Xt_Hindbrain;Xt_Involuting marginal zone;Xt_Neuroectoderm;Xt_Non-neural ectoderm;Xt_Spemann organizer	TRUE
Dr_si:dkey-238o14.9;Xt_Xetrov90015419m	Dr_si:dkey-238o14.9;Xt_sp5l	0.0369914	0.380414	0.343423	Eukaryota	Dr_Endoderm;Dr_Involuting marginal zone;Dr_Neuroectoderm;Dr_Tailbud	Xt_Endoderm;Xt_Involuting marginal zone;Xt_Neuroectoderm;Xt_Tailbud	FALSE
Dr_si:dkey-57k17.1;Xt_LOC100496561	Dr_si:dkey-57k17.1;Xt_sp5l	0.00428836	0.347692	0.343404	Eukaryota	Dr_Involuting marginal zone;Dr_Neuroectoderm	Xt_Involuting marginal zone;Xt_Neuroectoderm	TRUE
Dr_nkx2.2a;Xt_nkx2-2	Dr_nkx2.2a;Xt_nkx2-1	0.357602	0.70094	0.343338	Eukaryota	Dr_Forebrain/midbrain	Xt_Forebrain/midbrain	FALSE
Dr_zgc:173703;Xt_LOC100495499	Dr_zgc:173703;Xt_znf518b	0.0628476	0.406179	0.343331	Eukaryota	Dr_Blastula	Xt_Blastula	FALSE
[truncated: 560 more rows]
