# Supplementary material for: Mapping single-cell atlases throughout Metazoa unravels cell type evolution
Source: eLife. 2021 May 4;10:e66747. doi: 10.7554/eLife.66747 (PMC8139856; doi:10.7554/eLife.66747)
Supplement: Supplementary file 1. — Metadata include the number of cells, number of transcripts in the transcriptome, median number of transcripts detected per cell, the reference transcriptome used in this study, database through which the transcriptomes are provided, technology used for constructing the cell atlases, atlas data accessions, processing notes, and references. Leiden clusters and cell type annotations are reported for cells in each atlas. The Zebrafish and Xenopus tables include both the original cell type annotations and those used in this study. D. rerio, X. tropicalis, and mouse annotations include developmental stages. [file elife-66747-supp1.xlsx]

## Sheet: Cell atlas metadata
Species	# cells	# transcripts	median # detected transcripts/cell	Transcriptome	Database	Technology	GEO Accession/Data source	Notes	Reference
Spongilla lacustris	5732	39562	2748	v1.3		10X	GSE134912	Excluded cells annotated as 'transition cells'	J. M. Musser, K. J. Schippers, M. Nickel, G. Mizzon, A. B. Kohn, C. Pape, J. U. Hammel, F. Wolf, C. Liang, A. Hernández-Plaza, K. Achim, N. L. Schieber, W. R. Francis, S. Vargas R., S. Kling, M. Renkert, R. Feuda, I. Gaspar, P. Burkhardt, P. Bork, M. Beck, A. Kreshuk, G. Wörheide, J. Huerta-Cepas, Y. Schwab, L. L. Moroz, D. Arendt, “Profiling cellular diversity in sponges informs animal cell type…
Hydra vulgaris	25052	33376	1938	aepLRv2	NHGRI	10X	GSE121617		S. Siebert, J. A. Farrell, J. F. Cazet, Y. Abeykoon, A. S. Primack, C. E. Schnitzler, C. E. Juliano, Stem cell differentiation trajectories in Hydra resolved at single-cell resolution. Science. 365, eaav9314 (2019).
Schmidtea mediterranea	50562	25937	1156	dd_Smed_v4	Planmine	DropSeq	GSE111764		C. T. Fincher, O. Wurtzel, T. de Hoog, K. M. Kravarik, P. W. Reddien, Cell type transcriptome atlas for the planarian Schmidtea mediterranea. Science. 360, eaaq1736 (2018).
Schmidtea mediterranea (neoblasts)	7088	27525	3084	smed_20140614	Planosphere	10X	GSE107873		A. Zeng, H. Li, L. Guo, X. Gao, S. McKinney, Y. Wang, Z. Yu, J. Park, C. Semerad, E. Ross, L.-C. Cheng, E. Davies, K. Lei, W. Wang, A. Perera, K. Hall, A. Peak, A. Box, A. Sánchez Alvarado, Prospectively Isolated Tetraspanin+ Neoblasts Are Adult Pluripotent Stem Cells Underlying Planaria Regeneration. Cell. 173, 1593-1608.e20 (2018).
Schistosoma mansoni	7657	10162	2039	v13	Wormbase	SmartSeq2	GSE147355	~2.5-week-old juvenile schistosomes. Merged read counts from isoforms.	P. Li, D. N. Sarfati, Y. Xue, X. Yu, A. J. Tarashansky, S. R. Quake, B. Wang, “Single-cell analysis of Schistosoma mansoni reveals a conserved genetic program controlling germline stem cell fate” (preprint, Developmental Biology, 2020), , doi:10.1101/2020.07.06.190033.
Danio rerio (later stages)	14877	30677	2350	GRCz10	Zfin	10X	GSE112294	Developmental stages 18hpf-24hpf. Excluded extraembryonic tissues.	D. E. Wagner, C. Weinreb, Z. M. Collins, J. A. Briggs, S. Megason, A. M. Klein, Single-cell mapping of gene expression landscapes and lineage in the zebrafish embryo. Science. 360, 981–987 (2018).
Xenopus tropicalis (later stages)	61005	26550	601	Xtropicalisv9.0	Xenbase	10X	GSE113074	Developmental stages 18-22. Excluded extraembryonic tissues.	J. A. Briggs, C. Weinreb, D. E. Wagner, S. Megason, L. Peshkin, M. W. Kirschner, A. M. Klein, The dynamics of gene expression in vertebrate embryogenesis at single-cell resolution. Science. 360, eaar5780 (2018).
Mus musculus (later stages)	43918	29452	3362	GRCm38.92	Ensemble	10X	https://github.com/MarioniLab/EmbryoTimecourse2018	Developmental stages E8-E8.5. Excluded extraembryonic tissues.	B. Pijuan-Sala, J. A. Griffiths, C. Guibentif, T. W. Hiscock, W. Jawaid, F. J. Calero-Nieto, C. Mulas, X. Ibarra-Soria, R. C. V. Tyser, D. L. L. Ho, W. Reik, S. Srinivas, B. D. Simons, J. Nichols, J. C. Marioni, B. Göttgens, A single-cell molecular map of mouse gastrulation and early organogenesis. Nature. 566, 490–495 (2019).
Danio rerio (all stages)	36627	30677	2390	GRCz10	Ensemble	10X	GSE112294	Developmental stages 4hpf-24hpf. Excluded extraembryonic tissues.	D. E. Wagner, C. Weinreb, Z. M. Collins, J. A. Briggs, S. Megason, A. M. Klein, Single-cell mapping of gene expression landscapes and lineage in the zebrafish embryo. Science. 360, 981–987 (2018).
Xenopus tropicalis (all stages)	123633	26550	593	Xtropicalisv9.0	Xenbase	10X	GSE113074	Developmental stages 8-22. Excluded extraembryonic tissues.	J. A. Briggs, C. Weinreb, D. E. Wagner, S. Megason, L. Peshkin, M. W. Kirschner, A. M. Klein, The dynamics of gene expression in vertebrate embryogenesis at single-cell resolution. Science. 360, eaar5780 (2018).
Mus musculus (all stages)	91361	29452	3398	GRCm38.92	Ensemble	10X	https://github.com/MarioniLab/EmbryoTimecourse2018	Developmental stages E6.5-E8.5. Excluded extraembryonic tissues.	B. Pijuan-Sala, J. A. Griffiths, C. Guibentif, T. W. Hiscock, W. Jawaid, F. J. Calero-Nieto, C. Mulas, X. Ibarra-Soria, R. C. V. Tyser, D. L. L. Ho, W. Reik, S. Srinivas, B. D. Simons, J. Nichols, J. C. Marioni, B. Göttgens, A single-cell molecular map of mouse gastrulation and early organogenesis. Nature. 566, 490–495 (2019).

## Sheet: Spongilla lacustris
Cell name	Leiden clusters	Cell type
AAACCTGAGCTGCCCA-1	3	Archeocytes
AAACCTGCAACACCCG-1	11	Myopeptidocytes1
AAACCTGCAGTCGTGC-1	10	Apopylar Cells
AAACCTGGTTCGGGCT-1	6	Mesocytes 1
AAACCTGTCCCTCTTT-1	6	Mesocytes 1
AAACCTGTCTGAAAGA-1	17	Archeocytes
AAACGGGAGACCTAGG-1	11	Myopeptidocytes1
AAACGGGAGGTGTGGT-1	13	Archeocytes
AAACGGGAGTACCGGA-1	5	Metabaloyctes2
AAACGGGCAGTCGATT-1	13	Archeocytes
AAACGGGGTATCACCA-1	2	Archeocytes
AAACGGGGTCCGCTGA-1	11	Myopeptidocytes1
AAACGGGGTTTGACAC-1	7	Choanoblasts1
AAACGGGTCGAGGTAG-1	33	Mesocytes 3
AAAGATGCAGGGATTG-1	15	Archeocytes
AAAGATGGTAGCTAAA-1	31	Lophocytes
AAAGATGTCCGAAGAG-1	17	Archeocytes
AAAGATGTCCTCAACC-1	16	Choanoblasts1
AAAGCAAAGCGATCCC-1	4	Apendopinacocytes1
AAAGCAACAAACCTAC-1	2	Archeocytes
AAAGCAAGTCTCTCTG-1	17	Archeocytes
AAAGCAAGTTAGTGGG-1	2	Archeocytes
AAAGCAATCTGGGCCA-1	2	Archeocytes
AAAGTAGAGTTATCGC-1	17	Archeocytes
AAAGTAGCAAGGTTTC-1	16	Choanoblasts1
AAAGTAGCAGGTCGTC-1	15	Archeocytes
AAAGTAGCAGGTTTCA-1	6	Mesocytes 1
AAAGTAGCATGCATGT-1	17	Archeocytes
AAAGTAGTCGCCTGAG-1	15	Archeocytes
AAATGCCAGGCGCTCT-1	8	Choanoblasts2
AAATGCCAGTACGTAA-1	27	Apopylar Cells
AAATGCCTCAACGGGA-1	26	Apendopinacocytes2
AACACGTAGCCACCTG-1	6	Mesocytes 1
AACACGTAGCTATGCT-1	11	Myopeptidocytes1
AACACGTAGGTGACCA-1	19	Scleropharocytes
AACACGTAGTGGTAAT-1	25	Granulocytes
AACACGTCAAGCGATG-1	10	Apopylar Cells
AACACGTCAAGTCTGT-1	7	Choanoblasts1
AACACGTGTGCGATAG-1	3	Archeocytes
AACACGTTCAGTTCGA-1	4	Apendopinacocytes1
AACACGTTCCGTAGTA-1	10	Apopylar Cells
AACACGTTCTCTTGAT-1	2	Archeocytes
AACCATGCAACACGCC-1	23	Sclerocytes
AACCATGCATAGGATA-1	9	Myopeptidocytes2
AACCATGGTTGCCTCT-1	10	Apopylar Cells
AACCATGTCGCAAACT-1	28	Basopinacocytes
AACCGCGAGCCTCGTG-1	13	Archeocytes
AACCGCGAGTGGAGAA-1	13	Mesocytes 2
AACCGCGAGTGTCCCG-1	9	Myopeptidocytes2
AACCGCGCAAAGGAAG-1	7	Choanoblasts1
AACCGCGCACCAGGCT-1	9	Myopeptidocytes2
AACCGCGCATACCATG-1	11	Myopeptidocytes1
AACCGCGCATTTGCCC-1	8	Choanocytes
AACCGCGGTAGGCTGA-1	15	Archeocytes
AACCGCGGTATTCTCT-1	18	Archeocytes
AACCGCGGTGTAATGA-1	19	Apendopinacocytes1
AACGTTGAGGCTATCT-1	10	Apopylar Cells
AACGTTGAGTGCGATG-1	8	Choanocytes
AACGTTGCAAGGGTCA-1	4	Apendopinacocytes1
AACGTTGCACAACTGT-1	13	Archeocytes
AACGTTGCACAGGCCT-1	7	Choanoblasts1
AACGTTGGTGAGGGTT-1	5	Metabaloyctes1
AACGTTGGTGAGTATA-1	5	Metabaloyctes2
AACGTTGTCGCCATAA-1	4	Apendopinacocytes1
AACTCAGAGCTGAACG-1	19	Scleropharocytes
AACTCAGCAAAGCAAT-1	8	Choanocytes
AACTCAGCAAGTAGTA-1	30	Amoebocytes
AACTCAGGTAGCGATG-1	2	Archeocytes
AACTCAGGTCGAACAG-1	4	Apendopinacocytes1
AACTCAGGTCTAACGT-1	23	Sclerocytes
AACTCAGGTGGTCCGT-1	23	Sclerocytes
AACTCAGTCGATAGAA-1	5	Metabaloyctes2
AACTCCCCAATAGAGT-1	3	Archeocytes
AACTCCCGTACGCTGC-1	4	Apendopinacocytes1
AACTCCCGTATATCCG-1	5	Metabaloyctes1
AACTCCCGTGGCGAAT-1	2	Archeocytes
AACTCCCTCCTTCAAT-1	15	Archeocytes
AACTCCCTCTGGAGCC-1	2	Archeocytes
AACTCTTAGCTCCTCT-1	2	Archeocytes
AACTCTTAGTGTCCCG-1	13	Archeocytes
AACTCTTCAGACGCCT-1	2	Archeocytes
AACTCTTGTAAGGGCT-1	8	Choanocytes
AACTCTTGTATGAATG-1	2	Archeocytes
AACTCTTGTCAAAGAT-1	6	Mesocytes 1
AACTCTTGTCTAGTGT-1	10	Apopylar Cells
AACTCTTGTTCACCTC-1	5	Metabaloyctes1
AACTCTTGTTTAGGAA-1	27	Neuroid
AACTCTTTCAACTCTT-1	7	Choanoblasts1
AACTGGTAGAGTAATC-1	2	Archeocytes
AACTGGTAGCAGCGTA-1	18	Archeocytes
AACTGGTAGTTATCGC-1	2	Archeocytes
AACTGGTAGTTGTAGA-1	18	Archeocytes
AACTGGTCACAGTCGC-1	25	Granulocytes
AACTGGTCACATCTTT-1	17	Archeocytes
AACTGGTTCACTCCTG-1	6	Mesocytes 1
AACTGGTTCAGGTTCA-1	26	Apendopinacocytes2
AACTTTCAGACATAAC-1	24	Archeocytes
AACTTTCCAGGTGGAT-1	18	Archeocytes
AACTTTCCATAACCTG-1	4	Apendopinacocytes1
AACTTTCGTTCAACCA-1	8	Choanocytes
AACTTTCGTTTCGCTC-1	31	Lophocytes
AACTTTCTCCGCATCT-1	2	Sclerocytes
AACTTTCTCCTCTAGC-1	22	Incurrent Pinacocytes2
AAGACCTAGTCTCAAC-1	16	Choanoblasts1
AAGACCTCAATAACGA-1	11	Myopeptidocytes1
AAGACCTCACAGACAG-1	8	Choanocytes
AAGACCTGTCGGGTCT-1	2	Archeocytes
AAGACCTGTGTCAATC-1	2	Archeocytes
AAGACCTGTTCCTCCA-1	6	Mesocytes 1
AAGACCTTCCAGGGCT-1	4	Scleropharocytes
AAGACCTTCCTTTACA-1	14	Myopeptidocytes1
AAGCCGCAGACTCGGA-1	19	Scleropharocytes
AAGCCGCAGTGCTGCC-1	3	Archeocytes
AAGCCGCCAAGCGCTC-1	27	Neuroid
AAGCCGCTCTGCAAGT-1	3	Archeocytes
AAGGAGCAGCCACGTC-1	4	Apendopinacocytes1
AAGGAGCCACGAAATA-1	31	Lophocytes
AAGGAGCCAGTACACT-1	19	Scleropharocytes
AAGGAGCTCTACTTAC-1	2	Archeocytes
AAGGCAGCACGGTAAG-1	9	Myopeptidocytes2
AAGGCAGGTCTAGAGG-1	30	Amoebocytes
AAGGCAGGTCTCCCTA-1	6	Mesocytes 1
AAGGCAGGTGTAAGTA-1	2	Archeocytes
AAGGCAGTCTCATTCA-1	5	Metabaloyctes1
AAGGTTCAGCCTATGT-1	18	Archeocytes
AAGGTTCCAGATCTGT-1	11	Myopeptidocytes1
AAGGTTCGTCCATCCT-1	22	Incurrent Pinacocytes2
AAGGTTCGTTACCAGT-1	11	Myopeptidocytes1
AAGGTTCGTTCCACTC-1	8	Choanocytes
AAGTCTGAGCACCGCT-1	4	Apendopinacocytes1
AAGTCTGCACGAAGCA-1	5	Metabaloyctes1
AAGTCTGGTTACTGAC-1	5	Metabaloyctes2
AAGTCTGTCCGCAGTG-1	28	Basopinacocytes
AAGTCTGTCGGAGCAA-1	17	Archeocytes
AATCCAGAGGCCCTCA-1	4	Apendopinacocytes1
AATCCAGCACGAAGCA-1	5	Metabaloyctes1
AATCCAGGTAAGAGGA-1	23	Sclerocytes
AATCCAGGTTCCCTTG-1	5	Metabaloyctes2
AATCCAGTCAGTCCCT-1	8	Choanocytes
AATCGGTGTGAGTATA-1	5	Metabaloyctes2
ACACCAAAGCCACTAT-1	2	Archeocytes
ACACCAAAGGGTCGAT-1	9	Myopeptidocytes2
ACACCAACAGGCAGTA-1	7	Choanoblasts1
ACACCAAGTAATAGCA-1	4	Apendopinacocytes1
ACACCAAGTGTTGGGA-1	6	Mesocytes 1
ACACCAATCGTGACAT-1	5	Metabaloyctes1
ACACCAATCTTGTCAT-1	13	Archeocytes
ACACCCTAGACCTTTG-1	2	Archeocytes
ACACCCTAGCGTGAAC-1	23	Sclerocytes
ACACCCTCAAAGGTGC-1	14	Myopeptidocytes1
ACACCGGAGGCTAGAC-1	8	Choanocytes
ACACCGGAGTGATCGG-1	6	Mesocytes 1
ACACCGGCAATGAATG-1	11	Myopeptidocytes1
ACACCGGCAGTATCTG-1	5	Metabaloyctes2
ACACCGGCATCACGTA-1	18	Archeocytes
ACACTGAAGTAGTGCG-1	4	Apendopinacocytes1
ACACTGACATGCCTTC-1	17	Archeocytes
ACACTGACATGGTCAT-1	2	Archeocytes
ACACTGAGTCTCCACT-1	15	Archeocytes
ACACTGATCTGATTCT-1	8	Choanocytes
ACAGCCGCATACTCTT-1	11	Myopeptidocytes1
ACAGCCGGTTCCACTC-1	4	Apendopinacocytes1
ACAGCCGTCTTGAGAC-1	9	Myopeptidocytes2
ACAGCTAAGCCACTAT-1	3	Archeocytes
ACAGCTAAGTCTTGCA-1	9	Myopeptidocytes2
ACAGCTAAGTGTACGG-1	13	Archeocytes
ACAGCTACAGTAGAGC-1	3	Archeocytes
ACAGCTATCCGAACGC-1	7	Choanoblasts1
ACATACGAGACTTTCG-1	23	Sclerocytes
ACATACGAGATCGATA-1	22	Incurrent Pinacocytes2
ACATACGCAATAAGCA-1	12	Choanoblasts1
ACATACGCAGAGTGTG-1	11	Myopeptidocytes1
ACATACGCATTAGCCA-1	11	Myopeptidocytes1
ACATACGGTCCATCCT-1	15	Archeocytes
ACATACGGTCTGATTG-1	5	Metabaloyctes2
ACATACGGTTTAAGCC-1	3	Archeocytes
ACATACGTCGATGAGG-1	2	Archeocytes
ACATACGTCGTATCAG-1	4	Apendopinacocytes1
ACATCAGAGAGTGACC-1	22	Incurrent Pinacocytes2
ACATCAGAGCGCTTAT-1	3	Archeocytes
ACATCAGAGTGGGCTA-1	7	Choanoblasts1
ACATCAGAGTGTACCT-1	20	Myopeptidocytes1
ACATCAGCATAGGATA-1	22	Incurrent Pinacocytes2
ACATCAGTCACGATGT-1	9	Myopeptidocytes2
ACATCAGTCCGCGCAA-1	15	Archeocytes
ACATCAGTCTGCGGCA-1	26	Apendopinacocytes2
ACATGGTAGCCAGAAC-1	2	Archeocytes
ACATGGTAGTCATCCA-1	3	Archeocytes
ACATGGTCACCAGTTA-1	18	Archeocytes
ACATGGTGTTACGCGC-1	3	Archeocytes
ACCAGTAAGCGACGTA-1	7	Choanoblasts1
ACCAGTAAGTGCTGCC-1	11	Myopeptidocytes2
ACCAGTAAGTTCGCAT-1	4	Apendopinacocytes1
ACCAGTACAATGGAAT-1	5	Metabaloyctes1
ACCAGTACACCCTATC-1	2	Archeocytes
ACCAGTACAGATGAGC-1	7	Choanoblasts1
ACCAGTACATAACCTG-1	15	Archeocytes
ACCAGTAGTAAAGGAG-1	11	Myopeptidocytes1
ACCAGTAGTCGAGTTT-1	18	Archeocytes
ACCAGTAGTTGGTTTG-1	7	Choanoblasts1
ACCAGTATCAAGAAGT-1	2	Archeocytes
ACCAGTATCTCAAACG-1	2	Archeocytes
ACCCACTAGAAACGAG-1	2	Archeocytes
ACCCACTGTTCCTCCA-1	2	Archeocytes
ACCCACTTCGTGGTCG-1	11	Myopeptidocytes1
ACCGTAAAGATAGTCA-1	11	Myopeptidocytes1
ACCGTAACAACGATCT-1	9	Myopeptidocytes2
ACCGTAATCACAACGT-1	3	Archeocytes
ACCGTAATCATAGCAC-1	4	Apendopinacocytes1
ACCTTTAAGATCTGCT-1	19	Scleropharocytes
ACCTTTAAGGGAACGG-1	2	Archeocytes
ACCTTTACACCATCCT-1	6	Mesocytes 1
ACCTTTAGTGCTTCTC-1	19	Scleropharocytes
ACCTTTATCTTACCGC-1	2	Archeocytes
ACGAGCCGTCCAAGTT-1	5	Metabaloyctes2
ACGAGCCGTGCTCTTC-1	2	Archeocytes
ACGAGCCGTTCGAATC-1	26	Apendopinacocytes2
ACGAGCCTCCTCATTA-1	6	Mesocytes 1
ACGAGCCTCTCGTATT-1	5	Metabaloyctes2
ACGAGGAAGAAAGTGG-1	27	Neuroid
ACGAGGAAGATGGCGT-1	8	Choanocytes
ACGAGGAAGCGTGAAC-1	10	Apopylar Cells
ACGAGGAGTTACGCGC-1	22	Incurrent Pinacocytes2
ACGAGGATCAAGATCC-1	2	Archeocytes
ACGATACAGCTAGTGG-1	13	Archeocytes
ACGATACAGTACCGGA-1	29	Mesocytes 2
ACGATACCACGAAATA-1	6	Mesocytes 1
ACGATACCAGACTCGC-1	13	Archeocytes
ACGATACGTACCTACA-1	15	Archeocytes
ACGATACGTAGCGTCC-1	11	Myopeptidocytes2
ACGATACTCCGTAGTA-1	27	Neuroid
ACGATGTAGTAGGCCA-1	15	Archeocytes
ACGATGTCACGTCTCT-1	3	Archeocytes
ACGATGTCATATGAGA-1	12	Choanoblasts1
ACGATGTGTCATTAGC-1	11	Myopeptidocytes1
ACGATGTGTGGCTCCA-1	14	Myopeptidocytes1
ACGATGTGTTACGACT-1	14	Myopeptidocytes1
ACGATGTTCCCTAATT-1	18	Archeocytes
ACGATGTTCTAACTTC-1	17	Archeocytes
ACGATGTTCTTGAGGT-1	12	Choanoblasts2
ACGCAGCAGAGTGAGA-1	18	Archeocytes
ACGCAGCAGGGATGGG-1	0	Archeocytes
ACGCAGCCAATCGGTT-1	2	Archeocytes
ACGCAGCCATGCTAGT-1	12	Choanoblasts1
ACGCAGCCATGGGACA-1	10	Apopylar Cells
ACGCAGCTCGACGGAA-1	10	Apopylar Cells
ACGCCAGGTTGTACAC-1	18	Archeocytes
ACGCCAGTCGGCGGTT-1	17	Archeocytes
ACGCCGAAGAGTACAT-1	2	Archeocytes
ACGCCGAAGCCACGCT-1	2	Archeocytes
ACGCCGACACCAGATT-1	4	Apendopinacocytes1
ACGCCGACACTTACGA-1	6	Mesocytes 1
ACGCCGACAGACAGGT-1	33	Mesocytes 3
ACGCCGAGTCTGCAAT-1	2	Archeocytes
ACGCCGAGTGCGATAG-1	15	Archeocytes
ACGGAGACAAGAAGAG-1	2	Archeocytes
ACGGAGACAAGCCTAT-1	12	Choanoblasts2
ACGGAGACAGCTTCGG-1	17	Archeocytes
ACGGAGAGTTGTGGCC-1	19	Scleropharocytes
ACGGAGATCGGTCTAA-1	18	Archeocytes
ACGGAGATCGTTGCCT-1	23	Sclerocytes
ACGGAGATCTCGATGA-1	2	Archeocytes
ACGGAGATCTCTGCTG-1	17	Archeocytes
ACGGCCACATTAACCG-1	8	Choanocytes
ACGGCCAGTATAGGGC-1	13	Archeocytes
ACGGCCAGTCAACATC-1	13	Archeocytes
ACGGCCATCAACTCTT-1	2	Archeocytes
ACGGCCATCCTCTAGC-1	13	Archeocytes
ACGGCCATCTTCGAGA-1	12	Choanoblasts1
ACGGGCTAGACGCACA-1	19	Apendopinacocytes1
ACGGGCTAGATAGTCA-1	3	Archeocytes
ACGGGCTCACATCCAA-1	24	Archeocytes
ACGGGTCAGACCACGA-1	3	Archeocytes
ACGGGTCAGGCAAAGA-1	33	Mesocytes 3
ACGGGTCAGGCTATCT-1	2	Archeocytes
ACGGGTCGTCTTGTCC-1	12	Choanoblasts1
ACGGGTCGTGTGTGCC-1	17	Archeocytes
ACGGGTCTCAGTGTTG-1	2	Archeocytes
ACGTCAAAGCCGTCGT-1	22	Incurrent Pinacocytes2
ACGTCAAAGCTCCCAG-1	5	Metabaloyctes2
ACGTCAACATGGATGG-1	5	Metabaloyctes2
ACGTCAAGTACTTAGC-1	11	Myopeptidocytes1
ACGTCAATCTGACCTC-1	10	Apopylar Cells
ACTATCTAGAAGAAGC-1	13	Archeocytes
ACTATCTAGCCAACAG-1	2	Archeocytes
ACTATCTCAGTGAGTG-1	3	Archeocytes
ACTGAACAGGGAACGG-1	15	Archeocytes
ACTGAACAGTGAAGTT-1	23	Sclerocytes
ACTGAACCATGGTCAT-1	16	Choanoblasts1
ACTGAACGTCAATGTC-1	17	Archeocytes
ACTGAACGTTCGCGAC-1	9	Myopeptidocytes2
ACTGAGTAGATCCTGT-1	22	Incurrent Pinacocytes2
ACTGAGTCACCTTGTC-1	2	Archeocytes
ACTGAGTCATCGGAAG-1	4	Apendopinacocytes1
ACTGAGTGTACCGTTA-1	10	Apopylar Cells
ACTGAGTGTTACGCGC-1	31	Lophocytes
ACTGAGTTCCTGCAGG-1	17	Archeocytes
ACTGATGCACAGAGGT-1	9	Myopeptidocytes2
ACTGATGCAGATTGCT-1	15	Archeocytes
ACTGATGCATGGATGG-1	29	Mesocytes 2
ACTGATGGTAGTACCT-1	33	Mesocytes 3
ACTGATGTCAAGATCC-1	4	Apendopinacocytes1
ACTGATGTCCCTCTTT-1	4	Apendopinacocytes1
ACTGCTCAGAAAGTGG-1	14	Myopeptidocytes1
ACTGCTCAGCCAGTTT-1	30	Amoebocytes
ACTGCTCAGCCCTAAT-1	2	Archeocytes
ACTGCTCGTTCTGGTA-1	6	Mesocytes 1
ACTGCTCTCACCCTCA-1	2	Archeocytes
ACTGTCCCAATGAAAC-1	25	Granulocytes
ACTGTCCGTCACCTAA-1	10	Apopylar Cells
ACTGTCCTCGCACTCT-1	2	Archeocytes
ACTGTCCTCGCGGATC-1	8	Choanocytes
ACTTACTCAGGAATCG-1	12	Choanoblasts2
ACTTACTGTCATGCAT-1	7	Choanoblasts1
ACTTACTGTCTAGCCG-1	3	Archeocytes
ACTTACTGTTCAGTAC-1	19	Apendopinacocytes1
ACTTACTTCAATACCG-1	18	Archeocytes
ACTTACTTCCTTTACA-1	19	Scleropharocytes
ACTTGTTCACAAGTAA-1	15	Archeocytes
ACTTGTTCATTGGTAC-1	17	Archeocytes
ACTTGTTTCATCTGCC-1	3	Archeocytes
ACTTGTTTCCTACAGA-1	10	Apopylar Cells
ACTTTCAAGCAACGGT-1	30	Amoebocytes
ACTTTCAAGCCGCCTA-1	27	Neuroid
ACTTTCAAGCCGGTAA-1	2	Archeocytes
ACTTTCAAGCTAGCCC-1	4	Apendopinacocytes1
ACTTTCAGTACCGGCT-1	3	Archeocytes
AGAATAGAGACGCACA-1	6	Mesocytes 1
AGAATAGAGAGGGCTT-1	5	Metabaloyctes1
AGAATAGAGGACTGGT-1	3	Archeocytes
AGAATAGAGGCATGTG-1	11	Myopeptidocytes1
AGAATAGGTATAGTAG-1	5	Metabaloyctes2
AGAATAGGTATTCTCT-1	25	Granulocytes
AGAATAGTCGAATGCT-1	13	Archeocytes
AGACGTTAGCCAGTTT-1	3	Archeocytes
AGACGTTAGGATCGCA-1	8	Choanocytes
AGACGTTAGTGCTGCC-1	15	Archeocytes
AGACGTTAGTTTGCGT-1	17	Archeocytes
AGACGTTCAGTTAACC-1	11	Myopeptidocytes1
AGACGTTTCCGTACAA-1	17	Archeocytes
AGAGCGACACGAAAGC-1	11	Myopeptidocytes1
AGAGCGACAGGATTGG-1	13	Archeocytes
AGAGCTTAGAACAATC-1	11	Myopeptidocytes1
AGAGCTTTCAGCACAT-1	15	Archeocytes
AGAGCTTTCAGTTCGA-1	17	Archeocytes
AGAGTGGAGATGTGTA-1	3	Archeocytes
AGAGTGGCAGAAGCAC-1	14	Myopeptidocytes1
AGAGTGGGTAACGCGA-1	2	Archeocytes
AGAGTGGGTACGAAAT-1	17	Archeocytes
AGAGTGGGTCCTAGCG-1	3	Archeocytes
AGAGTGGGTCGAAAGC-1	8	Choanoblasts2
AGAGTGGTCAATAAGG-1	18	Archeocytes
AGAGTGGTCACTCCTG-1	24	Archeocytes
AGAGTGGTCGTTGCCT-1	3	Archeocytes
AGAGTGGTCTACGAGT-1	11	Myopeptidocytes2
AGATCTGAGCGTAATA-1	31	Lophocytes
AGATCTGAGCTAGTTC-1	13	Archeocytes
AGATCTGCATGTTGAC-1	9	Myopeptidocytes2
AGATCTGCATTAACCG-1	4	Apendopinacocytes1
AGATCTGGTTAAGTAG-1	3	Archeocytes
AGATCTGTCCTAGAAC-1	5	Metabaloyctes1
AGATCTGTCGTGGACC-1	3	Archeocytes
AGATTGCCAATGGACG-1	33	Mesocytes 3
AGATTGCCATTGGGCC-1	17	Archeocytes
AGATTGCGTGTGTGCC-1	15	Archeocytes
AGCAGCCAGAACTCGG-1	4	Apendopinacocytes1
AGCAGCCAGACAGACC-1	5	Metabaloyctes1
AGCAGCCAGCGTTGCC-1	16	Choanoblasts1
AGCAGCCAGTTAGGTA-1	30	Amoebocytes
AGCAGCCGTACATGTC-1	9	Myopeptidocytes2
AGCAGCCGTCTAGTCA-1	17	Archeocytes
AGCAGCCGTTCCAACA-1	17	Archeocytes
AGCAGCCGTTCCCTTG-1	2	Archeocytes
AGCAGCCTCAAGGTAA-1	24	Archeocytes
AGCAGCCTCAGATAAG-1	24	Archeocytes
AGCATACAGCGCTTAT-1	7	Choanoblasts2
AGCATACAGGCAATTA-1	7	Choanoblasts1
AGCATACCAAACCCAT-1	31	Lophocytes
AGCATACCAACTTGAC-1	3	Sclerocytes
AGCATACCAAGTACCT-1	16	Choanoblasts1
AGCATACCAGGTGCCT-1	3	Archeocytes
AGCATACGTCCCTTGT-1	22	Incurrent Pinacocytes2
AGCATACGTTCCGTCT-1	4	Apendopinacocytes1
AGCATACTCACTGGGC-1	19	Scleropharocytes
AGCCTAACAGTCACTA-1	2	Archeocytes
AGCCTAATCAATAAGG-1	24	Archeocytes
AGCCTAATCCGAAGAG-1	28	Basopinacocytes
AGCGGTCCAAGACGTG-1	15	Archeocytes
AGCGGTCCACGAGAGT-1	6	Mesocytes 1
AGCGGTCCAGCTCGAC-1	7	Choanoblasts1
AGCGGTCGTCCATCCT-1	15	Archeocytes
AGCGGTCGTTAAAGAC-1	2	Archeocytes
AGCGGTCTCAACTCTT-1	5	Metabaloyctes2
AGCGGTCTCGACGGAA-1	15	Archeocytes
AGCGTATGTCGATTGT-1	5	Metabaloyctes1
AGCGTATGTGATGTGG-1	2	Archeocytes
AGCGTATTCAATACCG-1	11	Myopeptidocytes1
AGCGTATTCATGTGGT-1	15	Archeocytes
AGCGTATTCGGAGCAA-1	4	Scleropharocytes
AGCGTATTCTATCGCC-1	2	Archeocytes
AGCGTCGAGACCTAGG-1	3	Archeocytes
AGCTCCTCAAGGACTG-1	3	Archeocytes
AGCTCCTCAGCTCGAC-1	9	Myopeptidocytes2
AGCTCCTCATACTACG-1	14	Myopeptidocytes1
AGCTCCTGTCTGATTG-1	9	Myopeptidocytes2
AGCTCCTGTTGAACTC-1	18	Archeocytes
AGCTCCTTCCGCAGTG-1	4	Apendopinacocytes1
AGCTCCTTCGACGGAA-1	11	Myopeptidocytes1
AGCTCTCAGGACAGCT-1	12	Choanoblasts1
AGCTCTCAGGGATGGG-1	2	Archeocytes
AGCTCTCCATACAGCT-1	9	Myopeptidocytes2
AGCTCTCGTCATCGGC-1	2	Archeocytes
AGCTCTCGTTCCACTC-1	3	Archeocytes
AGCTTGAAGAACAATC-1	17	Archeocytes
AGCTTGAAGCCTATGT-1	14	Myopeptidocytes1
AGCTTGACACGCGAAA-1	2	Archeocytes
AGCTTGACATGCAATC-1	6	Mesocytes 1
AGCTTGATCAACACGT-1	6	Mesocytes 1
AGGCCACAGTGGTCCC-1	2	Archeocytes
AGGCCACCAGCTCGCA-1	3	Archeocytes
AGGCCACCATGGGAAC-1	4	Apendopinacocytes1
AGGCCACGTCGCGTGT-1	11	Myopeptidocytes1
AGGCCACGTCTTTCAT-1	15	Archeocytes
AGGCCACTCTCTGAGA-1	5	Metabaloyctes1
AGGCCGTAGATGTAAC-1	7	Choanoblasts1
AGGCCGTAGCAATATG-1	3	Archeocytes
AGGCCGTAGTCGAGTG-1	22	Incurrent Pinacocytes2
AGGCCGTCAAAGTCAA-1	5	Metabaloyctes1
AGGCCGTCACATCCGG-1	4	Apendopinacocytes1
AGGCCGTCATCGTCGG-1	2	Archeocytes
AGGCCGTCATGATCCA-1	4	Apendopinacocytes1
AGGCCGTCATTCTTAC-1	6	Mesocytes 1
AGGCCGTGTGCACTTA-1	11	Myopeptidocytes1
AGGCCGTTCGGAGGTA-1	17	Archeocytes
AGGCCGTTCTTCGGTC-1	6	Mesocytes 1
AGGGAGTCACCTCGTT-1	27	Neuroid
AGGGAGTCATCGGACC-1	6	Myopeptidocytes1
AGGGAGTCATTCGACA-1	2	Archeocytes
AGGGAGTGTTAAGACA-1	2	Archeocytes
AGGGATGAGCCAGTAG-1	3	Archeocytes
AGGGATGAGGTGATAT-1	16	Choanoblasts1
AGGGATGAGTCCGTAT-1	14	Myopeptidocytes1
AGGGATGGTTGAGGTG-1	12	Choanoblasts2
AGGGATGGTTGTTTGG-1	2	Archeocytes
AGGGATGTCAACGGGA-1	17	Archeocytes
AGGGATGTCCATGAAC-1	11	Myopeptidocytes1
AGGGTGAAGTTAAGTG-1	2	Archeocytes
AGGGTGAGTATTCGTG-1	9	Myopeptidocytes2
AGGGTGATCACGACTA-1	12	Choanoblasts1
AGGGTGATCAGGTAAA-1	5	Metabaloyctes2
AGGTCATCAACGATGG-1	2	Archeocytes
AGGTCATCACAGCGTC-1	13	Archeocytes
AGGTCATTCTGACCTC-1	2	Archeocytes
AGGTCATTCTTAGCCC-1	9	Myopeptidocytes2
AGGTCATTCTTGCATT-1	2	Archeocytes
AGGTCATTCTTTAGGG-1	13	Archeocytes
AGGTCCGAGGCCATAG-1	15	Archeocytes
AGGTCCGCAATTGCTG-1	10	Apopylar Cells
AGGTCCGCACACAGAG-1	0	Archeocytes
AGGTCCGCAGCTGCTG-1	6	Mesocytes 1
AGGTCCGCATTCCTGC-1	11	Myopeptidocytes1
AGGTCCGGTTGTCGCG-1	2	Archeocytes
AGGTCCGTCAACGAAA-1	13	Archeocytes
AGTAGTCAGAGCTATA-1	25	Archeocytes
AGTAGTCAGGCTAGAC-1	22	Incurrent Pinacocytes2
AGTAGTCAGTCTCCTC-1	3	Archeocytes
AGTAGTCCAGTCACTA-1	5	Metabaloyctes1
AGTAGTCGTCTCCATC-1	13	Archeocytes
AGTAGTCGTGATAAGT-1	14	Myopeptidocytes1
AGTAGTCGTTGTGGCC-1	11	Myopeptidocytes2
AGTAGTCTCACATACG-1	30	Amoebocytes
AGTAGTCTCGCCCTTA-1	9	Myopeptidocytes2
AGTCTTTAGTGTCCAT-1	11	Myopeptidocytes1
AGTCTTTCACCACGTG-1	14	Myopeptidocytes1
AGTCTTTTCAGTTCGA-1	2	Archeocytes
AGTGAGGCAAATCCGT-1	17	Archeocytes
AGTGAGGGTCCGAAGA-1	2	Neuroid
AGTGAGGGTTCCCGAG-1	17	Archeocytes
AGTGAGGTCGGCGCAT-1	28	Basopinacocytes
AGTGAGGTCGTCCGTT-1	9	Myopeptidocytes2
AGTGGGACAAACAACA-1	33	Mesocytes 3
AGTGGGACATCATCCC-1	2	Archeocytes
AGTGGGAGTATTCTCT-1	7	Choanoblasts1
AGTGGGATCCTTGCCA-1	13	Archeocytes
AGTGGGATCGCAAACT-1	15	Archeocytes
AGTGTCAAGGTGCAAC-1	11	Myopeptidocytes1
AGTGTCACAGAGCCAA-1	2	Archeocytes
AGTGTCACATTGAGCT-1	17	Archeocytes
AGTGTCAGTCAAAGAT-1	25	Granulocytes
AGTGTCAGTTGTGGAG-1	6	Mesocytes 1
AGTGTCATCGACCAGC-1	3	Archeocytes
AGTTGGTAGTCGATAA-1	26	Apendopinacocytes2
AGTTGGTCACTGTTAG-1	2	Archeocytes
AGTTGGTCAGGTCGTC-1	14	Myopeptidocytes1
AGTTGGTTCCAGAGGA-1	2	Archeocytes
AGTTGGTTCGGAGCAA-1	2	Archeocytes
ATAACGCCATAACCTG-1	2	Archeocytes
ATAACGCGTCAAAGCG-1	26	Apendopinacocytes1
ATAACGCGTCTGGAGA-1	17	Archeocytes
ATAACGCTCAGTACGT-1	7	Choanoblasts1
ATAACGCTCTCGCATC-1	14	Sclerocytes
ATAAGAGAGTGGACGT-1	2	Archeocytes
ATAAGAGCACCTTGTC-1	3	Archeocytes
ATAAGAGTCAGAGGTG-1	24	Archeocytes
ATAGACCCACGCATCG-1	11	Myopeptidocytes1
ATAGACCCATCCGGGT-1	2	Archeocytes
ATAGACCGTAAGGGAA-1	2	Archeocytes
ATAGACCGTCCATCCT-1	18	Archeocytes
ATAGACCTCATGTCCC-1	27	Neuroid
ATAGACCTCCGTACAA-1	9	Myopeptidocytes2
ATCACGAAGATAGTCA-1	3	Archeocytes
ATCACGAAGATCGATA-1	11	Myopeptidocytes1
ATCACGAAGTGAAGTT-1	14	Myopeptidocytes1
ATCACGACAACTGCGC-1	3	Archeocytes
ATCACGAGTCTAAAGA-1	22	Incurrent Pinacocytes2
ATCATCTAGATCGGGT-1	13	Archeocytes
ATCATCTAGTGTACGG-1	3	Archeocytes
ATCATCTAGTTGTAGA-1	4	Apendopinacocytes1
ATCATCTGTAGCGCTC-1	14	Myopeptidocytes1
ATCATCTGTCCGAAGA-1	18	Archeocytes
ATCATCTGTGGTCCGT-1	12	Choanoblasts2
ATCATCTGTTAAGTAG-1	3	Archeocytes
ATCATCTTCCTTCAAT-1	2	Archeocytes
ATCATCTTCCTTGACC-1	7	Choanoblasts1
ATCATCTTCTGCAGTA-1	9	Myopeptidocytes2
ATCATGGCATAGACTC-1	22	Incurrent Pinacocytes2
ATCATGGGTGGCGAAT-1	30	Amoebocytes
ATCATGGGTTCTGAAC-1	3	Archeocytes
ATCATGGGTTGACGTT-1	9	Myopeptidocytes2
ATCATGGTCCAGAAGG-1	8	Choanocytes
ATCATGGTCGATAGAA-1	5	Metabaloyctes1
ATCATGGTCTTGCCGT-1	11	Myopeptidocytes1
ATCCACCAGAAGAAGC-1	2	Archeocytes
ATCCACCAGGCGTACA-1	23	Sclerocytes
ATCCACCAGGGCTTGA-1	27	Apopylar Cells
ATCCACCCAAGGTTCT-1	15	Archeocytes
ATCCACCGTCAAGCGA-1	11	Myopeptidocytes1
ATCCACCGTCAGGACA-1	6	Mesocytes 1
ATCCACCGTGTATGGG-1	4	Apendopinacocytes1
ATCCACCGTTCCTCCA-1	16	Choanoblasts1
ATCCACCTCCGTCAAA-1	26	Apendopinacocytes1
ATCCGAACAGTATAAG-1	6	Mesocytes 1
ATCCGAAGTACATCCA-1	12	Choanoblasts2
ATCCGAATCCGAAGAG-1	3	Archeocytes
ATCGAGTAGGCGTACA-1	2	Archeocytes
ATCGAGTAGTACGTTC-1	27	Apopylar Cells
ATCGAGTCACATTTCT-1	2	Archeocytes
ATCGAGTCACCAGGTC-1	11	Myopeptidocytes1
ATCGAGTCACGAAAGC-1	5	Metabaloyctes2
ATCGAGTCAGGCTCAC-1	19	Scleropharocytes
ATCGAGTCATGGGAAC-1	10	Apopylar Cells
ATCGAGTGTAAGGGCT-1	2	Archeocytes
ATCGAGTGTGCTGTAT-1	24	Sclerocytes
ATCGAGTTCGCACTCT-1	25	Granulocytes
ATCTACTAGCCGGTAA-1	19	Scleropharocytes
ATCTACTAGTGTACCT-1	9	Myopeptidocytes1
ATCTACTGTAAACCTC-1	15	Archeocytes
ATCTACTGTTGCCTCT-1	2	Archeocytes
ATCTACTTCGGAGCAA-1	9	Myopeptidocytes2
ATCTGCCAGCCAGTAG-1	6	Mesocytes 1
ATCTGCCAGCGATTCT-1	10	Apopylar Cells
ATCTGCCAGTACGACG-1	25	Granulocytes
ATCTGCCAGTCTTGCA-1	2	Archeocytes
ATCTGCCCACTCGACG-1	15	Archeocytes
ATCTGCCCAGTTAACC-1	4	Apendopinacocytes1
ATCTGCCGTATGCTTG-1	10	Apopylar Cells
ATCTGCCGTCTCTCTG-1	4	Apendopinacocytes1
ATGAGGGAGAGGGATA-1	4	Apendopinacocytes1
ATGAGGGAGGCTACGA-1	4	Apendopinacocytes1
ATGAGGGAGGGCTCTC-1	3	Archeocytes
ATGAGGGAGGTGTTAA-1	2	Archeocytes
ATGAGGGCATTCACTT-1	14	Myopeptidocytes1
ATGAGGGGTACCTACA-1	7	Choanoblasts1
ATGAGGGGTTCCCTTG-1	2	Archeocytes
ATGAGGGTCATATCGG-1	3	Archeocytes
ATGAGGGTCTGGTTCC-1	15	Archeocytes
ATGCGATAGTATCTCG-1	17	Archeocytes
ATGCGATCAAGGGTCA-1	15	Archeocytes
ATGCGATCAGCGTCCA-1	12	Choanoblasts1
ATGCGATCAGTAAGCG-1	3	Archeocytes
ATGGGAGAGGCGTACA-1	11	Myopeptidocytes1
ATGGGAGCACACCGCA-1	3	Archeocytes
ATGGGAGCATAGACTC-1	15	Archeocytes
ATGGGAGCATCGACGC-1	18	Archeocytes
ATGTGTGAGACTGTAA-1	12	Choanoblasts2
ATGTGTGGTAGCGTCC-1	2	Archeocytes
ATGTGTGGTGTGCCTG-1	17	Archeocytes
ATGTGTGTCAGAGGTG-1	9	Myopeptidocytes2
ATGTGTGTCGCGTTTC-1	4	Apendopinacocytes1
ATGTGTGTCGGGAGTA-1	2	Archeocytes
ATTACTCAGGCTAGAC-1	28	Basopinacocytes
ATTACTCCAGCATGAG-1	2	Archeocytes
ATTACTCCAGGATCGA-1	11	Myopeptidocytes1
ATTACTCCAGGATTGG-1	17	Archeocytes
ATTACTCGTTGTCTTT-1	3	Archeocytes
ATTACTCTCCTAGTGA-1	6	Mesocytes 1
ATTACTCTCTAACCGA-1	2	Archeocytes
ATTATCCAGTCCTCCT-1	11	Myopeptidocytes1
ATTATCCCAAACGTGG-1	12	Choanoblasts2
ATTCTACAGGAGCGAG-1	28	Basopinacocytes
ATTCTACCAAGCGAGT-1	3	Archeocytes
ATTCTACGTATAGTAG-1	33	Mesocytes 3
ATTCTACTCGCCCTTA-1	3	Archeocytes
ATTGGACAGCTAAACA-1	22	Incurrent Pinacocytes2
ATTGGACCATCACAAC-1	5	Metabaloyctes1
ATTGGACCATCGACGC-1	11	Myopeptidocytes1
ATTGGACCATGCTGGC-1	31	Lophocytes
ATTGGACGTTGATTCG-1	5	Metabaloyctes1
ATTGGACTCTTACCTA-1	4	Apendopinacocytes1
ATTGGTGAGAAACCAT-1	8	Choanocytes
ATTGGTGCACTAAGTC-1	27	Archeocytes
ATTGGTGTCATTGCCC-1	2	Archeocytes
ATTGGTGTCCGCAGTG-1	27	Neuroid
ATTGGTGTCGGCCGAT-1	2	Archeocytes
ATTGGTGTCTAACCGA-1	2	Archeocytes
ATTTCTGGTACAGACG-1	24	Archeocytes
ATTTCTGGTACGACCC-1	17	Archeocytes
ATTTCTGGTAGAAGGA-1	19	Scleropharocytes
CAACCAAAGCTTTGGT-1	24	Archeocytes
CAACCAAAGTACGTTC-1	9	Myopeptidocytes2
CAACCAAGTGCGGTAA-1	6	Mesocytes 1
CAACCAATCACCTCGT-1	15	Archeocytes
CAACCAATCCATTCTA-1	7	Choanoblasts1
CAACCTCAGATGTCGG-1	4	Apendopinacocytes1
CAACCTCGTAGAGTGC-1	6	Mesocytes 1
CAACCTCGTCAGAATA-1	24	Archeocytes
CAACCTCGTGCGAAAC-1	2	Archeocytes
CAACCTCTCACTTATC-1	2	Archeocytes
CAACTAGAGAAGCCCA-1	17	Archeocytes
CAACTAGAGATTACCC-1	3	Archeocytes
CAACTAGAGCTACCGC-1	8	Apopylar Cells
CAACTAGAGTCAAGCG-1	17	Archeocytes
CAACTAGGTACCGGCT-1	2	Archeocytes
CAACTAGGTTTCCACC-1	29	Mesocytes 2
CAAGAAAAGGAACTGC-1	16	Choanoblasts1
CAAGAAAAGGGCATGT-1	9	Myopeptidocytes2
CAAGAAACAGATGGCA-1	3	Archeocytes
CAAGAAAGTATAGTAG-1	4	Apendopinacocytes1
CAAGAAAGTCCAGTAT-1	24	Archeocytes
CAAGAAATCAGATAAG-1	31	Lophocytes
CAAGATCAGAGCCTAG-1	28	Basopinacocytes
CAAGATCGTAGCGCTC-1	3	Archeocytes
CAAGATCGTAGGGACT-1	3	Archeocytes
CAAGATCGTCATATGC-1	2	Archeocytes
CAAGATCTCTTACCTA-1	19	Scleropharocytes
CAAGGCCCAAGGCTCC-1	26	Apendopinacocytes2
CAAGGCCCAGACAAGC-1	23	Sclerocytes
CAAGGCCCATCCCATC-1	18	Archeocytes
CAAGGCCGTCACTTCC-1	12	Choanoblasts1
CAAGGCCGTTCCATGA-1	10	Apopylar Cells
CAAGGCCGTTCCGGCA-1	10	Apopylar Cells
CAAGGCCTCCACTCCA-1	22	Incurrent Pinacocytes2
CAAGGCCTCCGGGTGT-1	16	Choanoblasts1
CAAGGCCTCGACGGAA-1	5	Metabaloyctes1
CAAGTTGAGGACAGCT-1	19	Scleropharocytes
CAAGTTGAGGCTACGA-1	4	Apendopinacocytes1
CAAGTTGCAGGTCCAC-1	17	Archeocytes
CAAGTTGCATCGATGT-1	19	Scleropharocytes
CAAGTTGTCACTCCTG-1	5	Metabaloyctes2
CAAGTTGTCTGTCAAG-1	19	Scleropharocytes
CACAAACCAGGCAGTA-1	10	Apopylar Cells
CACAAACCAGGGTACA-1	16	Choanoblasts1
CACAAACGTAAGTGGC-1	22	Incurrent Pinacocytes2
CACAAACTCTTTAGTC-1	4	Apendopinacocytes1
CACACAACAGGTCGTC-1	2	Archeocytes
CACACAAGTCTTGTCC-1	16	Choanoblasts1
CACACAATCATCACCC-1	9	Myopeptidocytes2
CACACAATCATTGCCC-1	25	Choanoblasts1
CACACAATCCCATTTA-1	22	Incurrent Pinacocytes2
CACACAATCCGCAAGC-1	3	Archeocytes
CACACCTAGCGAGAAA-1	15	Archeocytes
CACACCTGTTTGACTG-1	12	Choanoblasts2
CACACCTTCACTCTTA-1	11	Myopeptidocytes1
CACACTCAGCTAGTGG-1	17	Archeocytes
CACACTCAGTCCTCCT-1	3	Archeocytes
CACACTCAGTTCGCAT-1	3	Archeocytes
CACACTCCAAATCCGT-1	14	Myopeptidocytes1
CACACTCCACGGACAA-1	5	Metabaloyctes2
CACACTCTCCACGACG-1	7	Choanoblasts1
CACACTCTCTCGTTTA-1	13	Archeocytes
CACAGGCAGGAGCGAG-1	23	Sclerocytes
CACAGGCAGGATATAC-1	25	Granulocytes
CACAGGCGTTCGAATC-1	15	Archeocytes
CACAGGCTCGCTTAGA-1	17	Archeocytes
CACAGGCTCGGAATCT-1	3	Archeocytes
CACAGTAAGAGTACAT-1	17	Archeocytes
CACAGTACAAATTGCC-1	10	Apopylar Cells
CACAGTACACCGTTGG-1	14	Myopeptidocytes1
CACAGTATCTCTGTCG-1	5	Metabaloyctes1
CACATAGCAGGTCGTC-1	3	Archeocytes
CACATAGGTCCGAATT-1	16	Choanoblasts1
CACATAGTCTATGTGG-1	11	Myopeptidocytes1
CACATTTCAACGCACC-1	3	Archeocytes
CACATTTCAAGGACAC-1	16	Choanoblasts1
CACATTTGTTATCCGA-1	3	Archeocytes
CACATTTGTTTGACAC-1	23	Sclerocytes
CACATTTTCCTACAGA-1	4	Apendopinacocytes1
CACATTTTCTGAGGGA-1	3	Archeocytes
CACATTTTCTGCGACG-1	6	Mesocytes 1
CACCACTAGTATGACA-1	3	Archeocytes
CACCACTGTAAGGGCT-1	18	Archeocytes
CACCACTGTCTTGCGG-1	23	Sclerocytes
CACCACTTCATCGGAT-1	14	Myopeptidocytes1
CACCACTTCCGAATGT-1	9	Myopeptidocytes2
CACCACTTCCGCTGTT-1	11	Myopeptidocytes1
CACCACTTCGGTCCGA-1	9	Myopeptidocytes1
CACCACTTCTAACTGG-1	3	Archeocytes
CACCAGGAGACGACGT-1	7	Choanoblasts1
CACCAGGAGACTCGGA-1	2	Archeocytes
CACCAGGGTTCGGCAC-1	3	Archeocytes
CACCAGGTCCCGGATG-1	7	Choanoblasts1
CACCAGGTCTTTAGTC-1	2	Archeocytes
CACCTTGGTGACGGTA-1	11	Myopeptidocytes1
CACCTTGTCACTCTTA-1	11	Myopeptidocytes1
CACTCCAAGCGATATA-1	7	Choanoblasts1
CACTCCACACGTTGGC-1	5	Metabaloyctes2
CACTCCACATCTCCCA-1	5	Metabaloyctes1
CACTCCACATGCTGGC-1	21	Archeocytes
CACTCCATCCGAAGAG-1	2	Archeocytes
CAGAATCAGCCCAATT-1	3	Archeocytes
CAGAATCAGCGCCTCA-1	12	Choanoblasts2
CAGAATCCAAGGTTTC-1	14	Myopeptidocytes1
CAGAATCCACCCATGG-1	22	Incurrent Pinacocytes2
CAGAATCGTACTTAGC-1	8	Choanocytes
CAGAATCTCTCATTCA-1	3	Archeocytes
CAGAGAGAGCCAGAAC-1	23	Sclerocytes
CAGAGAGAGTACCGGA-1	11	Myopeptidocytes2
CAGAGAGAGTTAAGTG-1	11	Myopeptidocytes1
CAGAGAGGTCGATTGT-1	6	Mesocytes 1
CAGAGAGGTGGTACAG-1	11	Myopeptidocytes1
CAGAGAGGTGTGACGA-1	11	Myopeptidocytes1
CAGAGAGGTTCCACTC-1	11	Myopeptidocytes1
CAGAGAGTCTCTGAGA-1	14	Myopeptidocytes1
CAGATCAAGCCACCTG-1	25	Granulocytes
CAGATCACAACTGGCC-1	3	Archeocytes
CAGATCACAGTCGTGC-1	9	Myopeptidocytes2
CAGATCAGTGTGCGTC-1	19	Scleropharocytes
CAGCAGCAGACCACGA-1	5	Metabaloyctes2
CAGCAGCCAATCCAAC-1	4	Apendopinacocytes1
CAGCAGCCACATGTGT-1	5	Metabaloyctes2
CAGCAGCGTTGGTTTG-1	3	Archeocytes
CAGCAGCTCGGTCCGA-1	4	Apendopinacocytes1
CAGCATACAATCTACG-1	30	Amoebocytes
CAGCATACAATGGAAT-1	25	Granulocytes
CAGCATACATTTGCTT-1	26	Apendopinacocytes2
CAGCATAGTCATGCCG-1	25	Granulocytes
CAGCATATCAGATAAG-1	3	Archeocytes
CAGCCGACAAGTTCTG-1	3	Archeocytes
CAGCCGACAGGTTTCA-1	23	Sclerocytes
CAGCCGAGTAGCGCTC-1	10	Apopylar Cells
CAGCCGAGTAGGCATG-1	9	Myopeptidocytes1
CAGCCGAGTGGTGTAG-1	14	Myopeptidocytes1
CAGCCGAGTTTGACTG-1	2	Archeocytes
CAGCGACAGATCCTGT-1	3	Archeocytes
CAGCGACAGGGCTTGA-1	11	Sclerocytes
CAGCGACCACTGAAGG-1	15	Archeocytes
CAGCGACCATGGTCTA-1	22	Incurrent Pinacocytes2
CAGCGACGTCGCGTGT-1	2	Archeocytes
CAGCGACGTGTCGCTG-1	9	Myopeptidocytes1
CAGCGACTCCATTCTA-1	13	Archeocytes
CAGCTAACAGAGTGTG-1	4	Apendopinacocytes1
CAGCTAATCTCAACTT-1	19	Scleropharocytes
CAGCTGGAGGCTCAGA-1	13	Archeocytes
CAGCTGGCAACAACCT-1	4	Apendopinacocytes1
CAGCTGGCAAGTTGTC-1	8	Choanoblasts2
CAGCTGGCATTACCTT-1	8	Choanocytes
CAGCTGGGTAGCTTGT-1	27	Apopylar Cells
CAGCTGGGTCGTGGCT-1	2	Archeocytes
CAGCTGGGTGTAAGTA-1	13	Archeocytes
CAGCTGGGTTCTGAAC-1	13	Archeocytes
CAGGTGCAGTACGCCC-1	11	Myopeptidocytes1
CAGGTGCGTCGCATCG-1	8	Choanoblasts2
CAGGTGCGTTGTACAC-1	2	Archeocytes
CAGTAACAGAACTCGG-1	7	Choanoblasts1
CAGTAACAGTGAATTG-1	4	Apendopinacocytes1
CAGTAACCAAGACACG-1	4	Apendopinacocytes1
CAGTAACGTTATTCTC-1	5	Metabaloyctes2
CAGTAACTCACCATAG-1	12	Choanoblasts2
CAGTAACTCCTTGCCA-1	30	Amoebocytes
CAGTAACTCTCAAGTG-1	2	Archeocytes
CAGTCCTAGTCGATAA-1	2	Archeocytes
CAGTCCTGTAAGGGCT-1	3	Archeocytes
CAGTCCTTCCGCGTTT-1	4	Apendopinacocytes1
CAGTCCTTCTAACGGT-1	2	Archeocytes
CAGTCCTTCTAAGCCA-1	2	Archeocytes
CAGTCCTTCTCAAACG-1	5	Metabaloyctes2
CAGTCCTTCTGACCTC-1	15	Archeocytes
CATATGGAGTGTCCAT-1	2	Archeocytes
CATATGGCAAGGACAC-1	8	Choanocytes
CATATGGCACAAGCCC-1	4	Apendopinacocytes1
CATATGGTCATCACCC-1	13	Archeocytes
CATATGGTCTAACGGT-1	14	Myopeptidocytes1
CATATGGTCTACGAGT-1	7	Choanoblasts1
CATATTCAGGATGGAA-1	2	Archeocytes
CATATTCAGGGTTCCC-1	2	Archeocytes
CATATTCCATCCTAGA-1	14	Myopeptidocytes2
CATATTCGTAAGGGAA-1	8	Choanocytes
CATCAAGCAATGGAGC-1	23	Sclerocytes
CATCAAGCAGTAGAGC-1	10	Choanoblasts2
CATCAAGGTCAATACC-1	16	Choanoblasts1
CATCAGAAGACAAGCC-1	4	Apendopinacocytes1
CATCAGAAGCCCAACC-1	16	Choanoblasts1
CATCAGAAGCTACCTA-1	25	Granulocytes
CATCAGAAGCTCCTTC-1	14	Myopeptidocytes1
CATCAGAAGGCTCTTA-1	16	Choanoblasts1
CATCAGAGTCTTCAAG-1	11	Myopeptidocytes1
CATCAGAGTGCACTTA-1	3	Archeocytes
CATCAGATCAGCATGT-1	4	Apendopinacocytes1
CATCAGATCCTTTACA-1	3	Archeocytes
CATCCACAGAAACCGC-1	23	Sclerocytes
CATCCACAGCTAGTTC-1	22	Incurrent Pinacocytes2
CATCCACAGTGCAAGC-1	2	Archeocytes
CATCCACCAAATTGCC-1	8	Choanocytes
CATCCACCAGTAACGG-1	18	Archeocytes
CATCCACGTCCAGTTA-1	9	Myopeptidocytes2
CATCCACGTTCCCTTG-1	2	Archeocytes
CATCCACTCAGCTTAG-1	31	Lophocytes
CATCCACTCGCAAGCC-1	23	Sclerocytes
CATCCACTCTTCTGGC-1	3	Archeocytes
CATCGAAAGAAGGCCT-1	14	Myopeptidocytes1
CATCGAAAGTAGGTGC-1	2	Archeocytes
CATCGAACAAAGCAAT-1	15	Archeocytes
CATCGAACAACACGCC-1	6	Mesocytes 1
CATCGAACACGACTCG-1	15	Archeocytes
CATCGAAGTAGGAGTC-1	23	Sclerocytes
CATCGAAGTCAAAGCG-1	3	Mesocytes 1
CATCGAAGTGACGCCT-1	15	Mesocytes 1
CATCGAATCAGTACGT-1	6	Mesocytes 1
CATCGAATCCAAAGTC-1	7	Choanoblasts1
CATCGGGCATCACCCT-1	15	Archeocytes
CATCGGGTCAACTCTT-1	2	Archeocytes
CATCGGGTCTAACTTC-1	16	Choanoblasts1
CATGACAAGCTAGCCC-1	2	Archeocytes
CATGACAAGCTCTCGG-1	25	Granulocytes
CATGACAAGGATCGCA-1	8	Choanoblasts2
CATGACAAGTAAGTAC-1	9	Myopeptidocytes2
CATGACAAGTGACATA-1	24	Archeocytes
CATGACACACCATGTA-1	24	Neuroid
CATGACACAGCCTTTC-1	18	Archeocytes
CATGACAGTGCGGTAA-1	23	Sclerocytes
CATGACAGTGTTTGTG-1	14	Myopeptidocytes1
CATGCCTAGGTGACCA-1	19	Scleropharocytes
CATGCCTAGTACGCGA-1	6	Mesocytes 1
CATGCCTGTGAGTGAC-1	2	Archeocytes
CATGCCTTCCAAAGTC-1	2	Archeocytes
CATGGCGAGGAGCGTT-1	12	Choanoblasts2
CATGGCGAGGGATACC-1	9	Myopeptidocytes2
CATGGCGAGGTGCAAC-1	15	Archeocytes
CATGGCGAGTGAAGAG-1	6	Mesocytes 1
CATGGCGCACAGTCGC-1	2	Archeocytes
CATGGCGCAGGTCGTC-1	4	Apendopinacocytes1
CATGGCGCATCCGTGG-1	6	Mesocytes 1
CATGGCGGTTTAGGAA-1	17	Archeocytes
CATGGCGTCCTCTAGC-1	3	Archeocytes
CATGGCGTCTGATTCT-1	2	Archeocytes
CATTATCAGATGTAAC-1	28	Basopinacocytes
CATTATCAGGATGGAA-1	4	Apendopinacocytes1
CATTATCGTAGCGTGA-1	23	Sclerocytes
CATTATCTCGGTCTAA-1	2	Archeocytes
CATTCGCCACCGGAAA-1	14	Myopeptidocytes1
CATTCGCCACGCTTTC-1	4	Apendopinacocytes1
CCAATCCAGAAGGCCT-1	24	Archeocytes
CCAATCCAGGAGTTGC-1	14	Myopeptidocytes1
CCAATCCCAATTCCTT-1	17	Archeocytes
CCAATCCCATCACGTA-1	22	Incurrent Pinacocytes2
CCAATCCGTGACGGTA-1	9	Myopeptidocytes2
CCAATCCGTTAAGAAC-1	14	Myopeptidocytes1
CCAATCCTCCGCATCT-1	14	Myopeptidocytes1
CCAATCCTCGATGAGG-1	9	Myopeptidocytes2
CCAATCCTCTGCCAGG-1	12	Choanoblasts1
CCACCTAGTCTTGCGG-1	2	Archeocytes
CCACCTATCTCAAACG-1	26	Apendopinacocytes2
CCACGGAAGGCTCATT-1	27	Myopeptidocytes2
CCACGGAAGTCTCCTC-1	9	Myopeptidocytes2
CCACGGAAGTGATCGG-1	6	Mesocytes 1
CCACGGACAAGCTGGA-1	11	Myopeptidocytes1
CCACGGATCAACGAAA-1	4	Apendopinacocytes1
CCACGGATCACTCCTG-1	10	Apopylar Cells
CCACTACGTCGCATCG-1	9	Myopeptidocytes1
CCACTACGTTAGGGTG-1	7	Choanoblasts1
CCACTACGTTGCCTCT-1	9	Myopeptidocytes2
CCACTACTCAACCAAC-1	4	Apendopinacocytes1
CCACTACTCAACGCTA-1	14	Myopeptidocytes1
CCACTACTCAGCATGT-1	10	Apopylar Cells
CCACTACTCCTAGAAC-1	27	Apopylar Cells
CCAGCGAAGACAATAC-1	15	Archeocytes
CCAGCGAAGGGTATCG-1	8	Choanocytes
CCAGCGAAGGTGCAAC-1	2	Archeocytes
CCAGCGAAGTCATCCA-1	3	Archeocytes
CCAGCGAGTAATCACC-1	2	Archeocytes
CCAGCGAGTCGCATAT-1	17	Archeocytes
CCAGCGATCATCGGAT-1	2	Archeocytes
CCATGTCAGTCTCAAC-1	5	Metabaloyctes2
CCATGTCCAATGAAAC-1	22	Incurrent Pinacocytes2
CCATGTCGTACTCTCC-1	8	Choanocytes
CCATGTCGTATTAGCC-1	2	Archeocytes
CCATGTCGTCTAGTGT-1	4	Apendopinacocytes1
CCATTCGAGACAGAGA-1	5	Metabaloyctes2
CCATTCGAGCCCGAAA-1	25	Choanoblasts1
CCATTCGCACAGCCCA-1	16	Choanoblasts1
CCATTCGCACCAGTTA-1	5	Metabaloyctes1
CCATTCGCAGTGACAG-1	11	Myopeptidocytes2
CCATTCGCATTTCAGG-1	6	Mesocytes 1
CCATTCGTCATGTCCC-1	3	Archeocytes
CCATTCGTCCGCGTTT-1	4	Apendopinacocytes1
CCCAATCAGATGCGAC-1	17	Archeocytes
CCCAATCAGGGCACTA-1	10	Apopylar Cells
CCCAATCCAGTATAAG-1	6	Mesocytes 1
CCCAATCCATCGGAAG-1	6	Mesocytes 1
CCCAATCTCCCAGGTG-1	2	Archeocytes
CCCAGTTAGACGCTTT-1	2	Archeocytes
CCCAGTTAGCGATTCT-1	25	Granulocytes
CCCAGTTCAAGCCGTC-1	2	Archeocytes
CCCAGTTCACCCAGTG-1	30	Amoebocytes
CCCAGTTGTCTCTTTA-1	26	Apendopinacocytes1
CCCAGTTGTTGTCTTT-1	22	Incurrent Pinacocytes2
CCCAGTTTCACTTATC-1	24	Archeocytes
CCCAGTTTCGGAGGTA-1	13	Archeocytes
CCCAGTTTCTACCAGA-1	22	Incurrent Pinacocytes2
CCCATACGTCCTGCTT-1	6	Mesocytes 1
CCCATACGTCGCTTCT-1	4	Apendopinacocytes1
CCCATACGTTATTCTC-1	10	Choanoblasts2
CCCATACTCATTGCCC-1	28	Basopinacocytes
CCCATACTCCTTTCGG-1	28	Basopinacocytes
CCCTCCTAGCGTAATA-1	2	Archeocytes
CCCTCCTCACATAACC-1	16	Choanoblasts1
CCCTCCTGTCTCGTTC-1	2	Archeocytes
CCCTCCTTCGCAGGCT-1	7	Choanoblasts1
CCGGGATAGCGACGTA-1	27	Apopylar Cells
CCGGGATAGCTGAAAT-1	4	Apendopinacocytes1
CCGGGATAGGGTTTCT-1	2	Archeocytes
CCGGGATCAAGCGATG-1	8	Choanoblasts2
CCGGGATCACAAGACG-1	2	Archeocytes
CCGGGATCAGCCTATA-1	5	Metabaloyctes1
CCGGGATCAGCGATCC-1	24	Archeocytes
CCGGGATGTACCGTAT-1	18	Archeocytes
CCGGGATTCAATACCG-1	3	Archeocytes
CCGGTAGAGGACAGCT-1	17	Archeocytes
CCGGTAGGTATGAAAC-1	15	Archeocytes
CCGGTAGGTGACTACT-1	10	Apopylar Cells
CCGGTAGTCAGCAACT-1	2	Archeocytes
CCGGTAGTCGGCTTGG-1	6	Mesocytes 1
CCGTACTAGAGAGCTC-1	10	Apopylar Cells
CCGTACTAGCACCGCT-1	15	Archeocytes
CCGTACTAGCGCTTAT-1	14	Myopeptidocytes1
CCGTACTAGTGTCCAT-1	3	Archeocytes
CCGTACTCACCATCCT-1	15	Archeocytes
CCGTACTGTATCACCA-1	26	Apendopinacocytes2
CCGTACTTCATTGCCC-1	25	Granulocytes
CCGTACTTCCCAAGAT-1	3	Archeocytes
CCGTACTTCTATCCCG-1	2	Archeocytes
CCGTACTTCTGTCTAT-1	2	Archeocytes
CCGTGGAAGCGTTTAC-1	2	Archeocytes
CCGTGGAGTCCGAACC-1	27	Apopylar Cells
CCGTGGATCACGATGT-1	19	Scleropharocytes
CCGTGGATCCGGCACA-1	12	Choanoblasts1
CCGTTCAAGCCTCGTG-1	10	Apopylar Cells
CCGTTCAAGTAGCCGA-1	5	Metabaloyctes2
CCGTTCAAGTGTACTC-1	11	Myopeptidocytes1
CCGTTCACAATGCCAT-1	18	Archeocytes
CCGTTCACACGGCCAT-1	9	Myopeptidocytes2
CCGTTCAGTCGCCATG-1	27	Apopylar Cells
CCGTTCAGTGAGTGAC-1	19	Scleropharocytes
CCGTTCAGTGCAACGA-1	9	Myopeptidocytes2
CCGTTCATCCACGTGG-1	15	Archeocytes
CCGTTCATCCAGATCA-1	19	Scleropharocytes
CCGTTCATCCTCAACC-1	24	Archeocytes
CCTAAAGAGATCCTGT-1	2	Archeocytes
CCTAAAGAGCCAGGAT-1	2	Archeocytes
CCTAAAGAGCTGAACG-1	5	Metabaloyctes1
CCTAAAGGTTCTGAAC-1	2	Archeocytes
CCTAAAGTCGTGGGAA-1	3	Archeocytes
CCTAAAGTCTTGCATT-1	4	Apendopinacocytes1
CCTACACAGATATACG-1	3	Archeocytes
CCTACACAGGACAGAA-1	2	Archeocytes
CCTACACAGTGTACCT-1	6	Mesocytes 1
CCTACACGTAGAGCTG-1	4	Apendopinacocytes1
CCTACCAAGATCCTGT-1	10	Apopylar Cells
CCTACCAAGGATATAC-1	2	Archeocytes
CCTACCAAGGCGACAT-1	3	Archeocytes
CCTACCACAAATCCGT-1	6	Mesocytes 1
CCTACCAGTTAAGAAC-1	4	Apendopinacocytes1
CCTAGCTAGCACGCCT-1	3	Archeocytes
CCTAGCTAGGGTGTTG-1	13	Archeocytes
CCTAGCTCAACGATGG-1	11	Myopeptidocytes2
CCTAGCTCAGCTGTTA-1	6	Mesocytes 1
CCTAGCTCATATACGC-1	26	Apendopinacocytes1
CCTAGCTGTCATGCAT-1	8	Choanocytes
CCTAGCTTCGTACGGC-1	8	Choanocytes
CCTATTAAGCTGTTCA-1	18	Archeocytes
CCTATTAAGTGTCCCG-1	4	Apendopinacocytes1
CCTATTAGTAGCGTGA-1	14	Myopeptidocytes1
CCTATTAGTCCTAGCG-1	24	Archeocytes
CCTATTATCCTACAGA-1	2	Archeocytes
CCTATTATCGCTTAGA-1	24	Archeocytes
CCTATTATCTGAGTGT-1	15	Archeocytes
CCTCAGTAGAAGATTC-1	13	Archeocytes
CCTCAGTAGGTGCACA-1	17	Archeocytes
CCTCAGTCAAGTCATC-1	3	Archeocytes
CCTCAGTGTCTGATTG-1	6	Mesocytes 1
CCTCAGTGTGTCTGAT-1	15	Archeocytes
CCTCAGTGTTATCCGA-1	17	Archeocytes
CCTCAGTTCAGAGGTG-1	15	Archeocytes
CCTCTGAAGGGTGTGT-1	11	Myopeptidocytes1
CCTCTGAGTTCACGGC-1	3	Archeocytes
CCTCTGATCAACACTG-1	6	Mesocytes 1
CCTCTGATCGTAGGAG-1	17	Archeocytes
CCTCTGATCTGATACG-1	10	Apopylar Cells
CCTCTGATCTGTCAAG-1	14	Myopeptidocytes1
CCTTACGAGATCCGAG-1	14	Myopeptidocytes1
CCTTACGAGTGAACAT-1	23	Sclerocytes
CCTTACGCACATCCAA-1	8	Choanocytes
CCTTACGCACGGCGTT-1	2	Archeocytes
CCTTACGCAGTTTACG-1	15	Archeocytes
CCTTACGTCATTATCC-1	3	Archeocytes
CCTTACGTCGGATGTT-1	6	Mesocytes 1
CCTTCCCAGATCCCGC-1	26	Apendopinacocytes2
CCTTCCCAGCTGAAAT-1	25	Granulocytes
CCTTCCCCATTGGTAC-1	5	Metabaloyctes2
CCTTCCCGTGAGCGAT-1	9	Myopeptidocytes2
CCTTCCCTCTGCCCTA-1	19	Scleropharocytes
CCTTCGAAGTACGATA-1	4	Apendopinacocytes1
CCTTCGAGTACATCCA-1	10	Apopylar Cells
CCTTCGAGTACTCGCG-1	3	Archeocytes
CCTTCGAGTCCCGACA-1	5	Metabaloyctes2
CCTTCGAGTCTCCATC-1	24	Archeocytes
CCTTTCTCACCATGTA-1	12	Choanocytes
CCTTTCTGTCGGCTCA-1	14	Myopeptidocytes1
CCTTTCTTCAAGCCTA-1	15	Archeocytes
CGAACATAGTGGGTTG-1	6	Mesocytes 1
CGAACATCACGTGAGA-1	15	Archeocytes
CGAACATCATGCAATC-1	24	Archeocytes
CGAACATGTCGTCTTC-1	3	Archeocytes
CGAACATTCATATCGG-1	12	Choanoblasts1
CGAACATTCTAACTGG-1	7	Choanoblasts1
CGAACATTCTACCTGC-1	11	Myopeptidocytes2
CGAATGTCAAGCCATT-1	11	Myopeptidocytes1
CGAATGTCACAACGCC-1	17	Archeocytes
CGAATGTGTCTGGAGA-1	6	Mesocytes 1
CGAATGTGTGCAACGA-1	9	Myopeptidocytes2
CGAATGTTCGCCTGAG-1	9	Myopeptidocytes2
CGAATGTTCTTGAGGT-1	15	Archeocytes
CGACCTTAGCCCAACC-1	27	Neuroid
CGACCTTAGCGCTTAT-1	5	Metabaloyctes1
CGACCTTCAATAGCGG-1	9	Myopeptidocytes2
CGACCTTCACATTCGA-1	17	Archeocytes
CGACCTTCAGAAGCAC-1	15	Archeocytes
CGACCTTGTAGCGTCC-1	27	Neuroid
CGACCTTTCAGCGATT-1	23	Sclerocytes
CGACCTTTCTCCAGGG-1	9	Myopeptidocytes2
CGACTTCAGAAACCAT-1	7	Choanoblasts1
CGACTTCAGAAACCGC-1	25	Granulocytes
CGACTTCAGAGTACAT-1	17	Archeocytes
CGACTTCAGCTCCTCT-1	2	Archeocytes
CGACTTCAGCTGATAA-1	2	Archeocytes
CGACTTCAGGCGCTCT-1	4	Apendopinacocytes1
CGACTTCAGTGGTAAT-1	23	Sclerocytes
CGACTTCCAGTATAAG-1	19	Scleropharocytes
CGACTTCGTCTCCCTA-1	4	Apendopinacocytes2
CGACTTCTCAAGATCC-1	9	Myopeptidocytes2
CGACTTCTCCATGAAC-1	3	Archeocytes
CGACTTCTCGCTAGCG-1	2	Archeocytes
CGAGAAGAGACCGGAT-1	11	Myopeptidocytes1
CGAGAAGAGGTGGGTT-1	4	Apendopinacocytes1
CGAGAAGCAATAAGCA-1	3	Archeocytes
CGAGAAGCAATGGATA-1	30	Amoebocytes
CGAGAAGCACTGTTAG-1	16	Choanoblasts1
CGAGAAGCATGCTGGC-1	3	Archeocytes
CGAGAAGGTCACTTCC-1	11	Myopeptidocytes1
CGAGAAGTCCGATATG-1	22	Incurrent Pinacocytes2
CGAGAAGTCTTCAACT-1	11	Myopeptidocytes1
CGAGAAGTCTTGTACT-1	4	Apendopinacocytes1
CGAGCACAGCTTCGCG-1	31	Lophocytes
CGAGCACCAGCATACT-1	8	Choanocytes
CGAGCACGTACCCAAT-1	5	Metabaloyctes2
CGAGCACGTAGCGTGA-1	28	Basopinacocytes
CGAGCCACACCAGATT-1	3	Archeocytes
CGAGCCACAGCGTCCA-1	12	Choanoblasts1
CGAGCCACATAGACTC-1	9	Myopeptidocytes2
CGATCGGAGATGTGGC-1	2	Archeocytes
CGATCGGAGCAAATCA-1	30	Amoebocytes
CGATCGGGTAATCACC-1	5	Metabaloyctes2
CGATCGGGTTATCGGT-1	15	Archeocytes
CGATCGGTCCTAGTGA-1	12	Choanoblasts2
CGATGGCGTCTGCCAG-1	2	Archeocytes
CGATGGCTCAAACGGG-1	15	Archeocytes
CGATGGCTCACCATAG-1	8	Choanocytes
CGATGGCTCCATGAGT-1	19	Scleropharocytes
CGATGTAAGCTAGTTC-1	3	Archeocytes
CGATGTACAAGGCTCC-1	12	Choanoblasts1
CGATGTAGTAACGACG-1	8	Choanocytes
CGATTGACATACTACG-1	4	Apendopinacocytes1
CGCCAAGCAAGCCTAT-1	9	Myopeptidocytes2
CGCCAAGCAGACACTT-1	11	Myopeptidocytes1
CGCCAAGCATCGATTG-1	2	Archeocytes
CGCCAAGTCGGTTCGG-1	3	Archeocytes
CGCGGTAAGGACCACA-1	30	Choanoblasts2
CGCGGTAAGGTTCCTA-1	8	Choanocytes
CGCGGTACAAACAACA-1	25	Granulocytes
CGCGGTACAATCCAAC-1	11	Myopeptidocytes1
CGCGGTACACAAGCCC-1	3	Archeocytes
CGCGGTAGTACCATCA-1	21	Archeocytes
CGCGGTATCTTCCTTC-1	28	Basopinacocytes
CGCGTTTAGAGACTTA-1	22	Incurrent Pinacocytes2
CGCGTTTTCCCAGGTG-1	14	Myopeptidocytes1
CGCGTTTTCTTTACAC-1	5	Metabaloyctes1
CGCTATCCACCCTATC-1	3	Archeocytes
CGCTATCCATGGTAGG-1	16	Choanoblasts1
CGCTATCCATTGGTAC-1	17	Archeocytes
CGCTATCGTGCCTGGT-1	28	Basopinacocytes
CGCTGGAAGAGGGCTT-1	33	Mesocytes 3
CGCTGGAAGGCTATCT-1	3	Archeocytes
CGCTGGAAGGGTCGAT-1	6	Mesocytes 1
CGCTGGACAAGACACG-1	7	Choanoblasts1
CGCTGGACACTAGTAC-1	15	Archeocytes
CGCTGGAGTGAGGCTA-1	28	Basopinacocytes
CGCTTCACATCTCGCT-1	5	Metabaloyctes2
CGCTTCATCAAAGACA-1	13	Archeocytes
CGCTTCATCGGAATCT-1	24	Archeocytes
CGCTTCATCTGGTGTA-1	14	Myopeptidocytes1
CGGACACTCGTATCAG-1	22	Incurrent Pinacocytes2
CGGACGTAGCCGCCTA-1	24	Archeocytes
CGGACGTAGGCATTGG-1	15	Archeocytes
CGGACGTCACGCATCG-1	22	Incurrent Pinacocytes2
CGGACGTCACTCGACG-1	5	Metabaloyctes1
CGGACGTCATAACCTG-1	6	Mesocytes 1
CGGACGTGTAGGCATG-1	11	Myopeptidocytes1
CGGACGTGTCGTTGTA-1	3	Archeocytes
CGGACGTTCACCAGGC-1	3	Archeocytes
CGGACGTTCACCGGGT-1	17	Archeocytes
CGGACGTTCATGCATG-1	31	Lophocytes
CGGACTGAGTATGACA-1	19	Scleropharocytes
CGGACTGCATCGGAAG-1	4	Apendopinacocytes1
CGGACTGGTGTGGCTC-1	23	Sclerocytes
CGGACTGTCCCAAGTA-1	14	Myopeptidocytes1
CGGACTGTCCTTGCCA-1	10	Apopylar Cells
CGGAGCTAGGACTGGT-1	3	Archeocytes
CGGAGCTCAAGCGATG-1	4	Apendopinacocytes1
CGGAGCTCACGAAAGC-1	14	Myopeptidocytes1
CGGAGCTCATACGCTA-1	4	Apendopinacocytes1
CGGAGCTGTCAACTGT-1	6	Mesocytes 1
CGGAGCTGTTTCCACC-1	14	Myopeptidocytes1
CGGAGCTTCGAGAACG-1	7	Choanoblasts1
CGGAGCTTCGCGCCAA-1	12	Choanoblasts1
CGGAGTCAGGCTCAGA-1	2	Archeocytes
CGGAGTCCAGGCTGAA-1	6	Mesocytes 1
CGGAGTCCATAAAGGT-1	4	Apendopinacocytes1
CGGAGTCCATCACGTA-1	11	Myopeptidocytes1
CGGAGTCCATCCTTGC-1	11	Myopeptidocytes1
CGGAGTCGTACCGGCT-1	13	Archeocytes
CGGAGTCGTGTAAGTA-1	3	Archeocytes
CGGAGTCGTTATTCTC-1	2	Archeocytes
CGGCTAGAGTGTACGG-1	2	Archeocytes
CGGCTAGCATGCCCGA-1	27	Apopylar Cells
CGGCTAGGTCGCCATG-1	30	Amoebocytes
CGGCTAGGTCTTGCGG-1	2	Archeocytes
CGGCTAGTCTGTCTAT-1	11	Myopeptidocytes1
CGGGTCAAGAGGGATA-1	13	Archeocytes
CGGGTCACACGGTAGA-1	7	Choanoblasts1
CGGGTCATCCAGTATG-1	14	Myopeptidocytes1
CGGTTAAAGGGTTTCT-1	12	Choanoblasts2
CGGTTAACACTTCGAA-1	6	Mesocytes 1
CGGTTAACAGATAATG-1	3	Archeocytes
CGGTTAACAGTCCTTC-1	23	Sclerocytes
CGGTTAATCCGATATG-1	6	Mesocytes 1
CGGTTAATCCTTTCTC-1	10	Apopylar Cells
CGGTTAATCTTTAGTC-1	0	Archeocytes
CGTAGCGAGTTACGGG-1	23	Sclerocytes
CGTAGCGCAAAGTCAA-1	11	Myopeptidocytes1
CGTAGCGCAAGAAGAG-1	23	Sclerocytes
CGTAGCGCACATGGGA-1	13	Archeocytes
CGTAGCGGTTTGGGCC-1	9	Myopeptidocytes2
CGTAGCGTCAAGGCTT-1	3	Archeocytes
CGTAGCGTCCGCGCAA-1	4	Apendopinacocytes1
CGTAGGCGTACATGTC-1	3	Archeocytes
CGTAGGCTCCACGTTC-1	17	Archeocytes
CGTCACTAGGATGGAA-1	2	Archeocytes
CGTCACTCATGGTTGT-1	12	Choanoblasts2
CGTCACTTCTTAGCCC-1	19	Scleropharocytes
CGTCAGGAGTGTCTCA-1	25	Granulocytes
CGTCAGGCAAACTGTC-1	15	Archeocytes
CGTCAGGCACAGGTTT-1	4	Apendopinacocytes1
CGTCAGGGTGATGATA-1	9	Myopeptidocytes2
CGTCAGGTCCGCGCAA-1	8	Choanocytes
CGTCCATAGATACACA-1	3	Archeocytes
CGTCCATCAAGTACCT-1	5	Metabaloyctes1
CGTCCATCACTACAGT-1	10	Apopylar Cells
CGTCCATCACTCTGTC-1	3	Archeocytes
CGTCCATGTAAGTAGT-1	4	Apendopinacocytes1
CGTCCATGTAGCTAAA-1	4	Apendopinacocytes1
CGTCCATGTCGGCACT-1	25	Granulocytes
CGTCCATTCTTGTTTG-1	4	Apendopinacocytes1
CGTCTACAGACGCACA-1	2	Archeocytes
CGTCTACAGTGAACGC-1	15	Archeocytes
CGTCTACGTAACGACG-1	3	Archeocytes
CGTCTACGTCGAAAGC-1	10	Apopylar Cells
CGTCTACTCACAATGC-1	7	Choanoblasts1
CGTCTACTCATAACCG-1	3	Archeocytes
CGTCTACTCATGCAAC-1	22	Incurrent Pinacocytes2
CGTCTACTCCTATGTT-1	22	Incurrent Pinacocytes2
CGTCTACTCTTTACGT-1	10	Apopylar Cells
CGTGAGCAGCTCAACT-1	2	Archeocytes
CGTGAGCCACGCGAAA-1	7	Choanoblasts1
CGTGAGCTCACCACCT-1	3	Archeocytes
CGTGAGCTCCAGTATG-1	9	Myopeptidocytes2
CGTGAGCTCCGTAGTA-1	4	Apendopinacocytes1
CGTGAGCTCGCCTGAG-1	19	Scleropharocytes
CGTGAGCTCGTTGACA-1	8	Choanocytes
CGTGTAAAGAGCTGGT-1	17	Archeocytes
CGTGTAACACGAGAGT-1	17	Archeocytes
CGTGTAACAGTGGGAT-1	3	Archeocytes
CGTGTCTAGTACACCT-1	9	Myopeptidocytes2
CGTGTCTAGTCGTACT-1	2	Archeocytes
CGTGTCTCAGCTCGCA-1	11	Myopeptidocytes1
CGTGTCTGTAGTACCT-1	24	Archeocytes
CGTGTCTTCACAATGC-1	2	Archeocytes
CGTGTCTTCGCTTGTC-1	6	Mesocytes 1
CGTGTCTTCTCAAACG-1	31	Lophocytes
CGTTAGAAGGACAGAA-1	9	Myopeptidocytes2
CGTTAGACAATAACGA-1	2	Archeocytes
CGTTAGACACCGGAAA-1	7	Choanoblasts1
CGTTAGACACGGTTTA-1	13	Archeocytes
CGTTAGAGTATCACCA-1	7	Choanoblasts1
CGTTAGAGTATGGTTC-1	18	Archeocytes
CGTTAGAGTCAATACC-1	6	Mesocytes 1
CGTTAGATCACCATAG-1	6	Mesocytes 1
CGTTAGATCCGAGCCA-1	10	Apopylar Cells
CGTTAGATCGCAAACT-1	31	Lophocytes
CGTTCTGGTACCGCTG-1	6	Mesocytes 1
CGTTCTGGTAGCCTCG-1	3	Archeocytes
CGTTCTGGTAGTACCT-1	21	Archeocytes
CGTTCTGGTTAAAGTG-1	15	Archeocytes
CGTTCTGGTTCAACCA-1	12	Choanoblasts2
CGTTCTGGTTTAGCTG-1	14	Myopeptidocytes1
CGTTGGGAGACCCACC-1	2	Archeocytes
CGTTGGGAGTGTGAAT-1	3	Archeocytes
CGTTGGGGTGCCTGGT-1	2	Archeocytes
CGTTGGGTCTGCAAGT-1	23	Sclerocytes
CGTTGGGTCTGTCTAT-1	22	Incurrent Pinacocytes2
CTAACTTGTTAGATGA-1	11	Myopeptidocytes1
CTAACTTTCTGAAAGA-1	25	Granulocytes
CTAACTTTCTGTCTCG-1	2	Archeocytes
CTAAGACAGGTCATCT-1	3	Archeocytes
CTAAGACCACACGCTG-1	6	Mesocytes 1
CTAAGACCACGGCGTT-1	2	Archeocytes
CTAAGACGTACTCGCG-1	3	Archeocytes
CTAAGACGTCATGCCG-1	25	Granulocytes
CTAAGACGTCGCGGTT-1	19	Scleropharocytes
CTAAGACGTTCTGAAC-1	13	Archeocytes
CTAAGACTCATGCAAC-1	27	Neuroid
CTAAGACTCCAGTAGT-1	28	Basopinacocytes
CTAAGACTCCGCATCT-1	22	Incurrent Pinacocytes2
CTAATGGCACGACGAA-1	2	Archeocytes
CTAATGGGTCCGTTAA-1	14	Myopeptidocytes1
CTAATGGGTGTGCGTC-1	9	Myopeptidocytes2
CTAATGGGTTCGTCTC-1	2	Archeocytes
CTAATGGTCCGCGGTA-1	15	Archeocytes
CTAATGGTCGCGGATC-1	13	Archeocytes
CTACACCAGCTAACTC-1	6	Mesocytes 1
CTACACCAGGTGTTAA-1	3	Archeocytes
CTACACCCAGCGAACA-1	17	Archeocytes
CTACACCTCCACGTTC-1	11	Myopeptidocytes1
CTACACCTCTCACATT-1	14	Myopeptidocytes1
CTACATTAGGATATAC-1	2	Archeocytes
CTACATTAGGCTAGAC-1	4	Apendopinacocytes1
CTACATTAGGTTCCTA-1	27	Apopylar Cells
CTACATTCAGTAAGAT-1	2	Archeocytes
CTACATTGTACCGCTG-1	3	Archeocytes
CTACATTTCTGTCTAT-1	26	Apendopinacocytes2
CTACCCAAGAAACCGC-1	9	Myopeptidocytes1
CTACCCAAGACGCTTT-1	7	Choanoblasts1
CTACCCAAGGCAATTA-1	3	Archeocytes
CTACCCACATGACGGA-1	7	Choanoblasts1
CTACCCAGTAGCGCAA-1	8	Choanocytes
CTACCCAGTTTCGCTC-1	8	Choanocytes
CTACGTCCACAGCCCA-1	3	Archeocytes
CTACGTCCAGCTGCAC-1	22	Incurrent Pinacocytes2
CTACGTCCATGGGACA-1	4	Apendopinacocytes1
CTACGTCCATGTTCCC-1	18	Archeocytes
CTACGTCGTACAGTTC-1	14	Myopeptidocytes1
CTACGTCGTGAGCGAT-1	2	Archeocytes
CTACGTCTCTTCATGT-1	18	Archeocytes
CTAGAGTGTAGCGTCC-1	2	Archeocytes
CTAGAGTGTGACGGTA-1	2	Archeocytes
CTAGAGTGTGCGGTAA-1	12	Choanoblasts2
CTAGAGTTCCCTAATT-1	4	Apendopinacocytes1
CTAGAGTTCCGCAGTG-1	2	Archeocytes
CTAGAGTTCCGTCAAA-1	3	Archeocytes
CTAGAGTTCTTAGCCC-1	14	Myopeptidocytes1
CTAGAGTTCTTATCTG-1	4	Apendopinacocytes1
CTAGCCTGTTATTCTC-1	9	Myopeptidocytes2
CTAGCCTTCACCGTAA-1	13	Archeocytes
CTAGCCTTCTTCGGTC-1	22	Incurrent Pinacocytes2
CTAGTGAAGCGTCTAT-1	6	Mesocytes 1
CTAGTGAAGGCGTACA-1	3	Archeocytes
CTAGTGAAGTGGGATC-1	13	Archeocytes
CTAGTGACAACGCACC-1	22	Incurrent Pinacocytes2
CTAGTGACACAGCCCA-1	8	Choanocytes
CTAGTGACACTAAGTC-1	15	Archeocytes
CTAGTGAGTAATCGTC-1	11	Myopeptidocytes2
CTAGTGATCCCTTGTG-1	10	Apopylar Cells
CTAGTGATCCTTTACA-1	17	Archeocytes
CTAGTGATCTGCAAGT-1	11	Myopeptidocytes1
CTCACACAGGCAAAGA-1	8	Choanocytes
CTCACACGTCTTCTCG-1	2	Archeocytes
CTCACACGTGAGGCTA-1	14	Myopeptidocytes1
CTCAGAAAGCAACGGT-1	3	Archeocytes
CTCAGAAAGTGAACGC-1	4	Apendopinacocytes1
CTCAGAACAATCCAAC-1	11	Myopeptidocytes1
CTCAGAAGTATATCCG-1	10	Apopylar Cells
CTCAGAAGTCATGCAT-1	3	Archeocytes
CTCAGAATCAACCATG-1	12	Choanoblasts1
CTCAGAATCGCGTTTC-1	17	Archeocytes
CTCATTAAGATATACG-1	9	Myopeptidocytes1
CTCATTACAGCGAACA-1	13	Archeocytes
CTCATTAGTAGCGATG-1	3	Archeocytes
CTCCTAGAGCGAAGGG-1	26	Apendopinacocytes2
CTCCTAGCAGCTGCTG-1	2	Archeocytes
CTCCTAGGTACATCCA-1	31	Lophocytes
CTCCTAGGTGAGTATA-1	2	Archeocytes
CTCCTAGGTTCCATGA-1	9	Myopeptidocytes2
CTCCTAGTCACAATGC-1	4	Apendopinacocytes1
CTCCTAGTCTCAAACG-1	15	Archeocytes
CTCGAAACACTTACGA-1	5	Metabaloyctes2
CTCGAAAGTCCGAACC-1	5	Metabaloyctes1
CTCGAAAGTGTGGTTT-1	2	Archeocytes
CTCGAAAGTTCCATGA-1	2	Archeocytes
CTCGAAATCAGTTTGG-1	23	Sclerocytes
CTCGAGGCACAGTCGC-1	12	Choanoblasts2
CTCGAGGCACGGTAAG-1	4	Apendopinacocytes1
CTCGAGGCAGTTTACG-1	6	Mesocytes 1
CTCGAGGCATGCGCAC-1	2	Archeocytes
CTCGAGGGTTTGGGCC-1	4	Apendopinacocytes1
CTCGAGGTCATAAAGG-1	10	Apopylar Cells
CTCGGAGAGTCTTGCA-1	13	Archeocytes
CTCGGAGCATGGTTGT-1	27	Neuroid
CTCGGAGTCATGTAGC-1	13	Archeocytes
CTCGGAGTCGTACGGC-1	6	Mesocytes 1
CTCGGGAGTAGGGACT-1	3	Archeocytes
CTCGGGAGTAGTACCT-1	7	Choanoblasts1
CTCGGGAGTTAAGACA-1	2	Archeocytes
CTCGTACAGACACGAC-1	16	Choanoblasts1
CTCGTACAGACTGGGT-1	13	Archeocytes
CTCGTACAGTATCGAA-1	8	Choanocytes
CTCGTACAGTGGTAGC-1	2	Archeocytes
CTCGTACGTGATGATA-1	15	Archeocytes
CTCGTACGTGCACTTA-1	3	Archeocytes
CTCGTACTCCACTGGG-1	3	Archeocytes
CTCGTACTCCTCTAGC-1	10	Apopylar Cells
CTCGTACTCGGATGTT-1	2	Archeocytes
CTCGTCACAGCCTATA-1	10	Apopylar Cells
CTCGTCACATACGCCG-1	9	Myopeptidocytes2
CTCGTCAGTGAAGGCT-1	13	Archeocytes
CTCGTCAGTGACGCCT-1	2	Archeocytes
CTCGTCATCATTGCCC-1	6	Mesocytes 1
CTCGTCATCGTCTGCT-1	2	Archeocytes
CTCTAATAGACAAGCC-1	2	Archeocytes
CTCTAATAGTGGGTTG-1	2	Archeocytes
CTCTAATGTAGAAGGA-1	6	Mesocytes 1
CTCTAATGTCCGACGT-1	10	Apopylar Cells
CTCTAATGTCGCGTGT-1	18	Archeocytes
CTCTAATGTTATGCGT-1	13	Archeocytes
CTCTAATTCCCACTTG-1	7	Choanoblasts1
CTCTAATTCCGCGGTA-1	26	Apendopinacocytes2
CTCTAATTCGTAGGTT-1	10	Choanocytes
CTCTACGAGAAGAAGC-1	5	Metabaloyctes2
CTCTACGAGACAATAC-1	14	Myopeptidocytes1
CTCTACGAGTGGCACA-1	22	Incurrent Pinacocytes2
CTCTACGCACGCTTTC-1	3	Archeocytes
CTCTACGCAGACAAGC-1	2	Archeocytes
CTCTACGCATCACGAT-1	2	Archeocytes
CTCTACGGTATGAATG-1	5	Metabaloyctes2
CTCTACGTCGCTTAGA-1	22	Incurrent Pinacocytes2
CTCTGGTAGCTAGTTC-1	2	Archeocytes
CTCTGGTAGTTTCCTT-1	28	Basopinacocytes
CTCTGGTCATACGCTA-1	11	Myopeptidocytes1
CTCTGGTGTCTCGTTC-1	9	Myopeptidocytes2
CTCTGGTGTTCGGGCT-1	22	Incurrent Pinacocytes2
CTGAAACAGTCCGTAT-1	4	Apendopinacocytes1
CTGAAACAGTTAAGTG-1	2	Archeocytes
CTGAAACCAATAAGCA-1	2	Archeocytes
CTGAAACCATGACGGA-1	2	Archeocytes
CTGAAACGTATGCTTG-1	8	Choanocytes
CTGAAACGTCGACTGC-1	3	Archeocytes
CTGAAACGTGCCTGGT-1	17	Archeocytes
CTGAAACTCGCGTAGC-1	6	Mesocytes 1
CTGAAACTCTGTCAAG-1	12	Choanoblasts1
CTGAAGTAGACCTAGG-1	15	Archeocytes
CTGAAGTAGAGATGAG-1	18	Archeocytes
CTGAAGTAGCAGACTG-1	7	Choanoblasts1
CTGAAGTAGCCAGAAC-1	9	Myopeptidocytes1
CTGAAGTCAAGTTCTG-1	2	Archeocytes
CTGAAGTCATATGAGA-1	28	Basopinacocytes
CTGATAGAGATAGTCA-1	4	Apendopinacocytes2
CTGATAGAGCTGCGAA-1	2	Archeocytes
CTGATAGAGTGTACCT-1	29	Mesocytes 2
CTGATAGGTATCACCA-1	27	Apopylar Cells
CTGATAGTCACGATGT-1	2	Archeocytes
CTGATAGTCAGGCCCA-1	9	Myopeptidocytes2
CTGATAGTCCTATGTT-1	15	Archeocytes
CTGATCCAGACTAGGC-1	8	Choanocytes
CTGATCCAGGGTCTCC-1	22	Incurrent Pinacocytes2
CTGATCCAGTAGGTGC-1	12	Choanoblasts2
CTGATCCGTCGAATCT-1	27	Neuroid
CTGATCCGTCGATTGT-1	7	Choanoblasts1
CTGATCCGTCTACCTC-1	22	Incurrent Pinacocytes2
CTGATCCGTCTGCCAG-1	17	Archeocytes
CTGATCCGTTTACTCT-1	3	Archeocytes
CTGATCCTCAGCTCGG-1	26	Apendopinacocytes2
CTGATCCTCCGCGGTA-1	8	Choanocytes
CTGATCCTCGGAATCT-1	19	Scleropharocytes
CTGCCTAAGACTACAA-1	13	Archeocytes
CTGCCTAAGGCATGTG-1	7	Choanoblasts1
CTGCCTACATCCCACT-1	16	Choanoblasts1
CTGCCTATCACGAAGG-1	6	Mesocytes 1
CTGCCTATCTAAGCCA-1	2	Archeocytes
CTGCGGAAGGTGTTAA-1	18	Archeocytes
CTGCGGACACCGCTAG-1	14	Myopeptidocytes1
CTGCGGACACTTCGAA-1	27	Neuroid
CTGCGGACAGGCAGTA-1	7	Choanoblasts1
CTGCGGACATGTCGAT-1	13	Archeocytes
CTGCGGAGTCGCTTTC-1	29	Mesocytes 2
CTGCGGATCAAACAAG-1	19	Scleropharocytes
CTGCGGATCAACGAAA-1	12	Choanoblasts2
CTGCGGATCCGAACGC-1	8	Choanocytes
CTGCTGTAGCTAAGAT-1	15	Archeocytes
CTGCTGTCAAAGGTGC-1	13	Archeocytes
CTGCTGTCACAGGTTT-1	26	Apendopinacocytes1
CTGCTGTCACCAGGCT-1	5	Metabaloyctes2
CTGCTGTGTATAGGGC-1	6	Mesocytes 1
CTGCTGTTCCGATATG-1	9	Myopeptidocytes2
CTGCTGTTCGTAGGTT-1	29	Choanoblasts1
CTGCTGTTCTGTTGAG-1	7	Choanoblasts1
CTGCTGTTCTTAACCT-1	9	Myopeptidocytes2
CTGGTCTAGGCTCTTA-1	14	Myopeptidocytes1
CTGGTCTCAGACAAGC-1	14	Myopeptidocytes1
CTGGTCTCATTTGCTT-1	18	Archeocytes
CTGGTCTGTCACACGC-1	25	Granulocytes
CTGGTCTTCCCGACTT-1	11	Myopeptidocytes1
CTGGTCTTCGCTAGCG-1	9	Myopeptidocytes2
CTGGTCTTCTCGATGA-1	2	Archeocytes
CTGGTCTTCTGGTGTA-1	3	Archeocytes
CTGTGCTCACATGGGA-1	23	Sclerocytes
CTGTGCTGTCCCTACT-1	4	Apendopinacocytes1
CTGTGCTGTTAAGTAG-1	22	Incurrent Pinacocytes2
CTGTGCTTCTGCAGTA-1	25	Granulocytes
CTGTTTAAGATCTGCT-1	3	Archeocytes
CTGTTTAAGGCTCAGA-1	28	Basopinacocytes
CTGTTTAAGGTGCACA-1	0	Archeocytes
CTGTTTACACCAGGCT-1	3	Archeocytes
CTGTTTAGTAGAAGGA-1	19	Scleropharocytes
CTGTTTAGTCTACCTC-1	10	Apopylar Cells
CTGTTTATCGACGGAA-1	17	Archeocytes
CTGTTTATCGCCCTTA-1	5	Metabaloyctes2
CTGTTTATCTGCAAGT-1	2	Archeocytes
CTGTTTATCTGCTGCT-1	2	Archeocytes
CTTAACTCACCCATGG-1	4	Apendopinacocytes1
CTTAACTGTAAGTGGC-1	14	Myopeptidocytes1
CTTAACTGTACCGTTA-1	14	Myopeptidocytes1
CTTAACTTCAGCATGT-1	17	Archeocytes
CTTAACTTCGGCCGAT-1	8	Choanocytes
CTTAACTTCTCTTATG-1	3	Archeocytes
CTTAACTTCTGGTTCC-1	10	Apopylar Cells
CTTACCGCATGCAACT-1	6	Mesocytes 1
CTTACCGCATTACGAC-1	2	Archeocytes
CTTACCGTCACCGTAA-1	12	Choanoblasts2
CTTACCGTCCGTTGCT-1	15	Archeocytes
CTTAGGAGTAGCGTGA-1	7	Choanoblasts1
CTTAGGAGTTCAGTAC-1	15	Archeocytes
CTTAGGATCATCTGCC-1	2	Archeocytes
CTTAGGATCGTCGTTC-1	8	Choanocytes
CTTCTCTAGCTGCCCA-1	15	Archeocytes
CTTCTCTCACCTCGGA-1	2	Archeocytes
CTTCTCTCAGCCAGAA-1	14	Myopeptidocytes1
CTTCTCTTCGAATCCA-1	33	Mesocytes 3
CTTGGCTAGAGCCCAA-1	14	Myopeptidocytes1
CTTGGCTAGGCATGTG-1	3	Archeocytes
CTTGGCTCACATGTGT-1	2	Archeocytes
CTTGGCTCACTAGTAC-1	9	Myopeptidocytes2
CTTGGCTCAGCATGAG-1	2	Archeocytes
CTTGGCTCATAACCTG-1	17	Archeocytes
CTTGGCTGTCCTGCTT-1	15	Archeocytes
CTTTGCGAGCTAGTGG-1	14	Myopeptidocytes1
CTTTGCGAGTATTGGA-1	2	Archeocytes
CTTTGCGCATGACATC-1	23	Sclerocytes
CTTTGCGCATGTTGAC-1	3	Archeocytes
CTTTGCGGTATCAGTC-1	10	Apopylar Cells
CTTTGCGTCATTTGGG-1	18	Archeocytes
CTTTGCGTCCCTCAGT-1	18	Archeocytes
GAAACTCAGAATGTGT-1	8	Choanocytes
GAAACTCAGGCATGTG-1	26	Apendopinacocytes2
GAAACTCAGGGCTTGA-1	5	Metabaloyctes2
GAAACTCCACACAGAG-1	13	Archeocytes
GAAACTCCATCAGTCA-1	4	Apendopinacocytes1
GAAACTCTCGGCGCAT-1	18	Archeocytes
GAAATGAGTAAAGGAG-1	15	Archeocytes
GAAATGAGTCGCATAT-1	20	Myopeptidocytes1
GAACATCAGACTTTCG-1	23	Sclerocytes
GAACATCAGCTGCGAA-1	7	Choanoblasts1
GAACATCAGGTAAACT-1	18	Archeocytes
GAACATCAGTGGAGAA-1	17	Archeocytes
GAACATCCAACACGCC-1	9	Myopeptidocytes2
GAACATCCAATACGCT-1	12	Choanoblasts2
GAACATCTCACTTCAT-1	26	Apendopinacocytes2
GAACCTAAGACATAAC-1	3	Archeocytes
GAACCTAAGGATGTAT-1	2	Archeocytes
GAACCTAAGTATGACA-1	15	Archeocytes
GAACCTACAGTCGTGC-1	4	Apendopinacocytes1
GAACCTACATGACGGA-1	3	Archeocytes
GAACCTACATGGTTGT-1	11	Myopeptidocytes1
GAACCTAGTTATCACG-1	2	Archeocytes
GAACCTATCAAAGACA-1	11	Myopeptidocytes1
GAACCTATCAGTTCGA-1	3	Archeocytes
GAACCTATCGTTTGCC-1	11	Myopeptidocytes1
GAACGGAAGAATTGTG-1	5	Metabaloyctes1
GAACGGAAGATCTGAA-1	21	Archeocytes
GAACGGAAGGCACATG-1	5	Metabaloyctes1
GAACGGAAGGCTATCT-1	7	Choanoblasts1
GAACGGAGTCCATGAT-1	4	Apendopinacocytes1
GAACGGAGTCTAGTCA-1	2	Archeocytes
GAACGGAGTCTTGTCC-1	3	Archeocytes
GAACGGAGTGCAACTT-1	13	Archeocytes
GAACGGATCGGTCTAA-1	3	Archeocytes
GAAGCAGAGGTGCAAC-1	2	Archeocytes
GAAGCAGAGGTGCACA-1	23	Sclerocytes
GAAGCAGTCAGGTTCA-1	2	Archeocytes
GAAGCAGTCAGTCCCT-1	2	Archeocytes
GAAGCAGTCCCTTGCA-1	24	Archeocytes
GAAGCAGTCCTCCTAG-1	9	Myopeptidocytes2
GAAGCAGTCTGATACG-1	23	Sclerocytes
GAATAAGAGTACCGGA-1	8	Choanocytes
GAATAAGAGTCAAGGC-1	3	Archeocytes
GAATAAGCAAGTTCTG-1	3	Archeocytes
GAATGAAAGGACGAAA-1	5	Metabaloyctes2
GAATGAACAGACGCTC-1	4	Apendopinacocytes1
GAATGAAGTCGAAAGC-1	2	Archeocytes
GAATGAATCTCGAGTA-1	25	Granulocytes
GACACGCAGACAGGCT-1	14	Myopeptidocytes1
GACACGCCAATAAGCA-1	10	Apopylar Cells
GACACGCGTGAAGGCT-1	10	Apopylar Cells
GACACGCGTGAGTGAC-1	3	Archeocytes
GACAGAGCAAACGCGA-1	25	Granulocytes
GACAGAGGTGTGACGA-1	5	Metabaloyctes1
GACAGAGTCATAAAGG-1	9	Myopeptidocytes2
GACAGAGTCGTGGACC-1	18	Archeocytes
GACAGAGTCTGGCGTG-1	15	Archeocytes
GACCAATAGACAAGCC-1	10	Apopylar Cells
GACCAATAGTGACATA-1	2	Archeocytes
GACCAATAGTTACCCA-1	4	Apendopinacocytes1
GACCAATCACATTCGA-1	11	Myopeptidocytes1
GACCAATCACGAAAGC-1	26	Apendopinacocytes1
GACCAATGTATAATGG-1	17	Archeocytes
GACCAATGTTCTGTTT-1	2	Archeocytes
GACCTGGAGTCGTTTG-1	11	Myopeptidocytes1
GACCTGGCACATGACT-1	19	Scleropharocytes
GACCTGGCATCAGTAC-1	14	Myopeptidocytes1
GACCTGGCATGGAATA-1	12	Choanoblasts1
GACCTGGTCATGTCTT-1	4	Apendopinacocytes1
GACGCGTCACAGCGTC-1	23	Sclerocytes
GACGCGTCAGCCTGTG-1	2	Archeocytes
GACGCGTCATTCGACA-1	11	Myopeptidocytes1
GACGCGTGTCTCAACA-1	14	Myopeptidocytes1
GACGCGTTCAAACAAG-1	9	Myopeptidocytes2
GACGCGTTCTTGGGTA-1	24	Archeocytes
GACGGCTAGAGACTAT-1	5	Metabaloyctes1
GACGGCTAGATCCTGT-1	3	Archeocytes
GACGGCTAGTGACATA-1	28	Basopinacocytes
GACGGCTGTCGAGTTT-1	14	Myopeptidocytes1
GACGGCTGTCGTTGTA-1	2	Archeocytes
GACGGCTGTTAAGGGC-1	31	Lophocytes
GACGGCTGTTTAGGAA-1	26	Apendopinacocytes2
GACGTGCAGTGTTGAA-1	4	Apendopinacocytes1
GACGTGCCATGAGCGA-1	11	Myopeptidocytes1
GACGTGCGTAATCACC-1	5	Metabaloyctes1
GACGTGCGTAGCTCCG-1	14	Myopeptidocytes1
GACGTGCGTGCTGTAT-1	4	Apendopinacocytes1
GACGTGCTCTCCGGTT-1	15	Archeocytes
GACGTTAAGCCCGAAA-1	31	Lophocytes
GACGTTACAGCCACCA-1	13	Archeocytes
GACTAACAGGTGCTAG-1	10	Apopylar Cells
GACTAACCAAGAAAGG-1	6	Mesocytes 1
GACTAACGTCTCACCT-1	5	Metabaloyctes2
GACTAACGTCTCTCGT-1	13	Archeocytes
GACTAACTCATGCAAC-1	15	Archeocytes
GACTAACTCATGTCTT-1	17	Archeocytes
GACTAACTCGCATGAT-1	24	Archeocytes
GACTAACTCTCAACTT-1	8	Choanocytes
GACTACAAGATGTAAC-1	24	Archeocytes
GACTACAAGCAGGTCA-1	6	Mesocytes 1
GACTACAAGGACAGCT-1	24	Archeocytes
GACTACAAGGATGCGT-1	2	Archeocytes
GACTACACATGGGACA-1	8	Choanoblasts2
GACTACAGTACCAGTT-1	2	Archeocytes
GACTGCGAGACCACGA-1	4	Apendopinacocytes1
GACTGCGAGCCAGAAC-1	2	Archeocytes
GACTGCGCAAGCTGTT-1	13	Archeocytes
GACTGCGCACTCTGTC-1	30	Amoebocytes
GACTGCGCAGCTTCGG-1	3	Archeocytes
GAGCAGAAGAATTCCC-1	16	Choanoblasts1
GAGCAGAGTCTAGGTT-1	5	Metabaloyctes2
GAGCAGATCTCAAACG-1	18	Archeocytes
GAGGTGAGTTGGGACA-1	17	Archeocytes
GAGGTGATCACGATGT-1	20	Myopeptidocytes1
GAGGTGATCTTGTCAT-1	25	Granulocytes
GAGTCCGAGAACAATC-1	9	Myopeptidocytes2
GAGTCCGAGTACGACG-1	24	Archeocytes
GAGTCCGCACAGACAG-1	3	Archeocytes
GAGTCCGCATACTACG-1	11	Myopeptidocytes1
GATCAGTAGTCGTTTG-1	3	Archeocytes
GATCAGTCATATGCTG-1	19	Scleropharocytes
GATCAGTGTGGAAAGA-1	27	Neuroid
GATCAGTTCAGAGACG-1	2	Archeocytes
GATCAGTTCGGTGTCG-1	3	Archeocytes
GATCAGTTCTAGCACA-1	16	Choanoblasts1
GATCGATCAGTATCTG-1	3	Archeocytes
GATCGATGTACACCGC-1	9	Myopeptidocytes2
GATCGATGTAGATTAG-1	24	Archeocytes
GATCGATGTCTCACCT-1	5	Metabaloyctes2
GATCGATTCATCGATG-1	15	Archeocytes
GATCGATTCTGCGACG-1	13	Archeocytes
GATCGCGAGGGATGGG-1	15	Archeocytes
GATCGCGCACTGTTAG-1	15	Archeocytes
GATCGCGCAGTCACTA-1	11	Myopeptidocytes1
GATCGCGCATCACGTA-1	6	Mesocytes 1
GATCGCGGTTTCCACC-1	5	Metabaloyctes1
GATCGTAAGACTAGGC-1	3	Archeocytes
GATCGTAAGCTAGCCC-1	6	Mesocytes 1
GATCGTAAGGTCATCT-1	5	Metabaloyctes2
GATCGTAAGTGTGGCA-1	4	Scleropharocytes
GATCGTAAGTTAAGTG-1	2	Archeocytes
GATCGTAGTCGGATCC-1	14	Myopeptidocytes1
GATCGTAGTCTCTCGT-1	2	Archeocytes
GATCGTAGTTCTGTTT-1	11	Myopeptidocytes1
GATCGTATCAACGGCC-1	28	Basopinacocytes
GATCTAGAGCAAATCA-1	2	Archeocytes
GATCTAGAGCTTTGGT-1	14	Myopeptidocytes1
GATCTAGAGTGGAGTC-1	2	Archeocytes
GATCTAGCAAGCCGTC-1	12	Choanoblasts2
GATGAAAAGACAAAGG-1	11	Myopeptidocytes2
GATGAAAAGGCCCGTT-1	17	Archeocytes
GATGAAAAGTGGGATC-1	10	Apopylar Cells
GATGAAACAGAGTGTG-1	12	Choanoblasts1
GATGAAACAGCTCCGA-1	5	Metabaloyctes2
GATGAAAGTACTTCTT-1	5	Metabaloyctes2
GATGAAAGTCTCATCC-1	4	Apendopinacocytes1
GATGAAAGTTACGTCA-1	4	Apendopinacocytes1
GATGAAATCAACGCTA-1	6	Mesocytes 1
GATGAAATCAGTTTGG-1	12	Choanoblasts2
GATGAAATCATTGCCC-1	9	Myopeptidocytes2
GATGAAATCGCCAAAT-1	10	Apopylar Cells
GATGAAATCTGGCGTG-1	6	Mesocytes 1
GATGAGGCACAACGTT-1	12	Choanoblasts1
GATGAGGTCGGCGGTT-1	19	Scleropharocytes
GATGCTACAGGGTACA-1	9	Myopeptidocytes2
GATGCTAGTGCAACGA-1	3	Archeocytes
GATGCTAGTTTGTGTG-1	3	Archeocytes
GATGCTATCGATGAGG-1	19	Apendopinacocytes1
GATTCAGAGAGCAATT-1	24	Archeocytes
GATTCAGAGCAATATG-1	5	Metabaloyctes2
GATTCAGAGTCTCAAC-1	15	Archeocytes
GATTCAGAGTTTAGGA-1	26	Apendopinacocytes2
GATTCAGCAAACTGTC-1	15	Archeocytes
GATTCAGCACAGCGTC-1	2	Archeocytes
GATTCAGCAGACAAAT-1	28	Basopinacocytes
GATTCAGCAGGTCTCG-1	2	Archeocytes
GATTCAGCATCACAAC-1	14	Myopeptidocytes1
GATTCAGGTAGAGTGC-1	2	Archeocytes
GATTCAGGTCCTAGCG-1	23	Sclerocytes
GATTCAGTCCACGACG-1	6	Mesocytes 1
GCAAACTAGCTCCTCT-1	6	Mesocytes 1
GCAAACTCAACACGCC-1	3	Archeocytes
GCAAACTCAAGCGAGT-1	7	Choanoblasts1
GCAAACTCACAAGCCC-1	5	Metabaloyctes2
GCAAACTCAGTCAGAG-1	2	Archeocytes
GCAAACTTCATTATCC-1	24	Archeocytes
GCAAACTTCGGATGTT-1	7	Choanoblasts1
GCAATCAAGCTCTCGG-1	22	Incurrent Pinacocytes2
GCAATCAAGTCTCGGC-1	13	Archeocytes
GCAATCACAAGCCGCT-1	23	Sclerocytes
GCAATCACACATCTTT-1	17	Archeocytes
GCAATCACAGTAACGG-1	8	Choanocytes
GCAATCAGTACCGTTA-1	17	Archeocytes
GCAATCAGTACGCACC-1	17	Archeocytes
GCAATCAGTGACGGTA-1	2	Archeocytes
GCAATCATCACAACGT-1	10	Apopylar Cells
GCAATCATCAGCCTAA-1	10	Apopylar Cells
GCAATCATCAGTTAGC-1	22	Incurrent Pinacocytes2
GCACATACAATGGATA-1	8	Choanocytes
GCACATACAGCTCGCA-1	30	Amoebocytes
GCACTCTAGAGACTTA-1	6	Mesocytes 1
GCACTCTCAGAAGCAC-1	4	Apendopinacocytes1
GCACTCTCAGGGAGAG-1	12	Apopylar Cells
GCACTCTCATGCAATC-1	2	Archeocytes
GCACTCTGTGTGGTTT-1	5	Metabaloyctes2
GCACTCTTCGACCAGC-1	4	Apendopinacocytes1
GCAGCCACAAATTGCC-1	2	Archeocytes
GCAGCCACAAGTACCT-1	6	Mesocytes 1
GCAGCCACACATCCGG-1	23	Sclerocytes
GCAGCCACATTCGACA-1	17	Archeocytes
GCAGCCAGTCGCGAAA-1	15	Archeocytes
GCAGCCAGTTCAGCGC-1	3	Archeocytes
GCAGCCATCGGCATCG-1	19	Scleropharocytes
GCAGTTAAGGTTACCT-1	22	Incurrent Pinacocytes2
GCAGTTAGTCGCTTCT-1	7	Choanoblasts1
GCAGTTATCCTTAATC-1	8	Choanocytes
GCATACACAATCCGAT-1	2	Archeocytes
GCATACACACCCAGTG-1	4	Apendopinacocytes1
GCATACATCCTTAATC-1	6	Mesocytes 1
GCATACATCTGTCCGT-1	23	Sclerocytes
GCATGATAGCTAGCCC-1	3	Archeocytes
GCATGATCAAGACACG-1	15	Archeocytes
GCATGATCAGGGCATA-1	5	Metabaloyctes1
GCATGATCAGTCTTCC-1	17	Archeocytes
GCATGATGTCAGAAGC-1	18	Sclerocytes
GCATGATGTCGATTGT-1	2	Archeocytes
GCATGATGTGCAACTT-1	15	Archeocytes
GCATGATTCATCTGTT-1	4	Apendopinacocytes1
GCATGCGAGGTGCTTT-1	27	Neuroid
GCATGCGCACATCCGG-1	17	Archeocytes
GCATGCGGTACTCGCG-1	31	Lophocytes
GCATGCGGTCAATGTC-1	6	Mesocytes 1
GCATGCGTCGGCGCAT-1	25	Granulocytes
GCATGTAGTCTAGCCG-1	9	Myopeptidocytes2
GCATGTATCAGAGACG-1	2	Archeocytes
GCATGTATCGTCTGAA-1	17	Archeocytes
GCATGTATCTTAACCT-1	8	Choanocytes
GCCAAATAGCTAACTC-1	2	Archeocytes
GCCAAATCAGCTGCAC-1	14	Myopeptidocytes1
GCCAAATGTCGCATCG-1	3	Archeocytes
GCCAAATTCCGCATCT-1	14	Myopeptidocytes1
GCCAAATTCTGACCTC-1	15	Archeocytes
GCCTCTACAGACAAAT-1	2	Archeocytes
GCCTCTAGTGAGTGAC-1	8	Choanocytes
GCGACCAAGAAAGTGG-1	31	Lophocytes
GCGACCAAGACTAGAT-1	3	Archeocytes
GCGACCAAGGGTGTGT-1	2	Archeocytes
GCGACCACACAGATTC-1	8	Choanocytes
GCGACCACATGCTAGT-1	10	Apopylar Cells
GCGACCAGTAAACCTC-1	2	Archeocytes
GCGACCAGTCTGCAAT-1	11	Myopeptidocytes1
GCGACCATCAGCGACC-1	3	Archeocytes
GCGAGAACAAACCTAC-1	2	Archeocytes
GCGAGAACAAAGCAAT-1	2	Archeocytes
GCGAGAACATCGACGC-1	11	Myopeptidocytes1
GCGAGAACATGACGGA-1	12	Choanoblasts2
GCGAGAAGTCGCTTTC-1	7	Choanoblasts1
GCGAGAATCAACGAAA-1	26	Apendopinacocytes2
GCGCAACAGAGCCCAA-1	15	Archeocytes
GCGCAACAGGGATGGG-1	24	Archeocytes
GCGCAACGTATCACCA-1	9	Myopeptidocytes2
GCGCAACGTCCGAATT-1	3	Archeocytes
GCGCAACTCATCGCTC-1	18	Archeocytes
GCGCAGTAGGTGATTA-1	9	Myopeptidocytes1
GCGCAGTAGGTGCTAG-1	18	Archeocytes
GCGCAGTAGTGCGTGA-1	11	Myopeptidocytes1
GCGCAGTCATGCCCGA-1	19	Scleropharocytes
GCGCAGTGTAGTACCT-1	3	Archeocytes
GCGCAGTGTCCATGAT-1	32	Sclerocytes
GCGCAGTTCGGAATCT-1	1	Archeocytes
GCGCAGTTCGGTGTCG-1	5	Metabaloyctes2
GCGCCAACAAATACAG-1	15	Archeocytes
GCGCCAACATCCTTGC-1	25	Apendopinacocytes1
GCGCCAAGTCCAGTAT-1	8	Choanocytes
GCGCCAATCAGCTTAG-1	2	Archeocytes
GCGCCAATCAGTGCAT-1	3	Archeocytes
GCGCCAATCCACGTTC-1	2	Archeocytes
GCGCGATAGCTGCAAG-1	12	Choanoblasts2
GCGCGATCAAGCGCTC-1	28	Basopinacocytes
GCGCGATCACATAACC-1	10	Apopylar Cells
GCGCGATGTACCGCTG-1	2	Archeocytes
GCGCGATTCAAGATCC-1	3	Archeocytes
GCGCGATTCAGCTGGC-1	7	Choanoblasts1
GCGCGATTCCAGGGCT-1	2	Archeocytes
GCGGGTTAGAGCTATA-1	14	Myopeptidocytes1
GCGGGTTCATCACGAT-1	15	Archeocytes
GCGGGTTGTCCGAACC-1	6	Mesocytes 1
GCGGGTTTCCACGAAT-1	22	Incurrent Pinacocytes2
GCGGGTTTCTGATTCT-1	5	Metabaloyctes2
GCGGGTTTCTTTACAC-1	2	Archeocytes
GCTCCTAAGAATAGGG-1	7	Choanoblasts1
GCTCCTAAGAGTACCG-1	6	Mesocytes 1
GCTCCTAAGCAAATCA-1	8	Choanocytes
GCTCCTACAGTTCATG-1	17	Archeocytes
GCTCCTAGTAAGTGGC-1	5	Metabaloyctes2
GCTCCTAGTGATGCCC-1	3	Archeocytes
GCTCTGTAGTGCTGCC-1	12	Choanocytes
GCTCTGTCACAGCGTC-1	2	Archeocytes
GCTCTGTCATAAGACA-1	9	Myopeptidocytes2
GCTCTGTGTTACGGAG-1	17	Archeocytes
GCTGCAGAGTAGCCGA-1	31	Lophocytes
GCTGCAGCACATCTTT-1	3	Archeocytes
GCTGCAGGTCAATACC-1	3	Archeocytes
GCTGCAGTCGAACTGT-1	3	Archeocytes
GCTGCAGTCGCGGATC-1	2	Archeocytes
GCTGCAGTCGCTTAGA-1	3	Archeocytes
GCTGCAGTCTTGTCAT-1	3	Archeocytes
GCTGCGAAGATCCTGT-1	15	Archeocytes
GCTGCGAAGCACCGCT-1	2	Archeocytes
GCTGCGAAGCCCAACC-1	4	Apendopinacocytes1
GCTGCGACACTTAACG-1	9	Myopeptidocytes2
GCTGCGACACTTAAGC-1	0	Archeocytes
GCTGCGATCACGCATA-1	4	Apendopinacocytes1
GCTGCGATCAGTGCAT-1	19	Scleropharocytes
GCTGCGATCCTTGCCA-1	11	Myopeptidocytes1
GCTGCGATCGCGTAGC-1	15	Archeocytes
GCTGCTTAGCCCAACC-1	24	Neuroid
GCTGCTTAGCCTCGTG-1	9	Myopeptidocytes2
GCTGCTTGTCAAGCGA-1	5	Metabaloyctes2
GCTGCTTGTGGCGAAT-1	9	Myopeptidocytes2
GCTGGGTAGCACCGTC-1	2	Archeocytes
GCTGGGTCACAGATTC-1	12	Choanoblasts2
GCTTCCAAGATATACG-1	14	Myopeptidocytes1
GCTTCCACACATCCAA-1	13	Archeocytes
GCTTCCATCCAGTATG-1	2	Archeocytes
GCTTCCATCCATGCTC-1	5	Metabaloyctes1
GCTTCCATCTTTAGGG-1	6	Mesocytes 1
GCTTGAACATGGTCTA-1	15	Archeocytes
GCTTGAAGTCAAGCGA-1	29	Mesocytes 2
GCTTGAATCTGAGTGT-1	2	Archeocytes
GGAAAGCAGAGCAATT-1	2	Archeocytes
GGAAAGCGTTGCGTTA-1	3	Archeocytes
GGAACTTAGGAGTAGA-1	14	Myopeptidocytes1
GGAACTTAGTTCGCAT-1	8	Choanoblasts2
GGAACTTCAGACAGGT-1	6	Mesocytes 1
GGAACTTCAGGTCGTC-1	4	Apendopinacocytes1
GGAACTTGTCTCTTTA-1	3	Archeocytes
GGAATAACACCGAATT-1	3	Archeocytes
GGAATAACACGAAATA-1	14	Myopeptidocytes1
GGAATAACATGGGAAC-1	13	Archeocytes
GGAATAAGTAGATTAG-1	4	Apendopinacocytes1
GGAATAATCACGAAGG-1	3	Archeocytes
GGAATAATCCAGTAGT-1	6	Mesocytes 1
GGACAAGAGGACGAAA-1	13	Archeocytes
GGACAAGAGTCATCCA-1	2	Archeocytes
GGACAAGCAACGATCT-1	26	Apendopinacocytes2
GGACAAGCAACTTGAC-1	15	Archeocytes
GGACAAGTCACTCCTG-1	14	Myopeptidocytes1
GGACAAGTCCATGAAC-1	5	Metabaloyctes2
GGACAGAAGAGTTGGC-1	15	Archeocytes
GGACAGAAGCCCAATT-1	22	Incurrent Pinacocytes2
GGACAGACAGCCACCA-1	9	Myopeptidocytes2
GGACAGATCAATAAGG-1	19	Scleropharocytes
GGACAGATCCTGTACC-1	19	Scleropharocytes
GGACATTCAGATTGCT-1	14	Myopeptidocytes1
GGACATTGTACGAAAT-1	6	Mesocytes 1
GGACATTGTAGGGTAC-1	15	Archeocytes
GGACATTGTTCCCTTG-1	10	Apopylar Cells
GGACATTTCTTCATGT-1	7	Choanoblasts1
GGACGTCAGCGTTTAC-1	3	Sclerocytes
GGACGTCAGGAATGGA-1	10	Apopylar Cells
GGACGTCCAGGTTTCA-1	2	Archeocytes
GGACGTCGTTCAGCGC-1	2	Archeocytes
GGACGTCTCCATTCTA-1	4	Apendopinacocytes1
GGACGTCTCCTATGTT-1	18	Archeocytes
GGACGTCTCTGCTGTC-1	2	Scleropharocytes
GGAGCAACACTTAAGC-1	2	Archeocytes
GGAGCAACATGATCCA-1	3	Archeocytes
GGAGCAAGTAGCCTCG-1	2	Archeocytes
GGAGCAATCAGAGGTG-1	14	Myopeptidocytes1
GGAGCAATCTCAAGTG-1	2	Archeocytes
GGATGTTAGGAATTAC-1	3	Archeocytes
GGATGTTGTAAGGGAA-1	15	Archeocytes
GGATGTTGTGCGATAG-1	10	Apopylar Cells
GGATTACAGGCTCAGA-1	3	Archeocytes
GGATTACAGTGCCAGA-1	33	Mesocytes 3
GGATTACGTAGCGTCC-1	15	Archeocytes
GGATTACGTGCCTTGG-1	2	Archeocytes
GGCAATTAGTTAAGTG-1	22	Incurrent Pinacocytes2
GGCAATTCACCAGCAC-1	3	Archeocytes
GGCAATTGTAACGCGA-1	4	Apendopinacocytes1
GGCAATTGTCGATTGT-1	10	Apopylar Cells
GGCCGATAGAGCTGCA-1	26	Apendopinacocytes1
GGCCGATAGCAGCCTC-1	12	Choanoblasts1
GGCCGATAGCTAAACA-1	8	Choanocytes
GGCCGATAGCTCCCAG-1	2	Archeocytes
GGCCGATCACTACAGT-1	14	Myopeptidocytes1
GGCCGATCAGCTGCAC-1	15	Archeocytes
GGCCGATCAGGGTTAG-1	5	Metabaloyctes1
GGCCGATGTCCTCTTG-1	6	Mesocytes 1
GGCGACTAGAAGCCCA-1	23	Sclerocytes
GGCGACTAGAGACTAT-1	15	Archeocytes
GGCGACTAGCGAGAAA-1	14	Myopeptidocytes1
GGCGACTAGCTAAGAT-1	18	Archeocytes
GGCGACTAGGCTCTTA-1	5	Metabaloyctes1
GGCGACTCACTAGTAC-1	2	Archeocytes
GGCGACTCATATGGTC-1	8	Choanocytes
GGCGACTCATCAGTAC-1	29	Mesocytes 2
GGCGACTGTAAAGGAG-1	11	Myopeptidocytes2
GGCGACTGTAGCCTCG-1	3	Archeocytes
GGCGACTTCATCGCTC-1	6	Mesocytes 1
GGCGACTTCCGTAGGC-1	11	Myopeptidocytes1
GGCGTGTGTCATCCCT-1	10	Apopylar Cells
GGCGTGTTCGAACTGT-1	9	Myopeptidocytes2
GGCTCGAAGCAGCGTA-1	15	Archeocytes
GGCTCGAAGTGTACCT-1	10	Apopylar Cells
GGCTCGACAAGACACG-1	15	Archeocytes
GGCTCGACAAGTTGTC-1	14	Myopeptidocytes1
GGCTCGAGTCCGAAGA-1	6	Mesocytes 1
GGCTCGAGTGATGTGG-1	3	Archeocytes
GGCTCGAGTGCTTCTC-1	2	Archeocytes
GGCTCGATCTCGATGA-1	3	Archeocytes
GGCTGGTAGATATGCA-1	8	Choanocytes
GGCTGGTAGGATGGTC-1	18	Archeocytes
GGCTGGTAGTCACGCC-1	13	Archeocytes
GGCTGGTGTCCTCTTG-1	15	Archeocytes
GGCTGGTTCCGATATG-1	15	Archeocytes
GGCTGGTTCTTCGAGA-1	3	Archeocytes
GGGAATGAGTCGTTTG-1	12	Choanoblasts1
GGGAATGCAAACGCGA-1	4	Apendopinacocytes1
GGGAATGCAAAGTCAA-1	7	Choanoblasts1
GGGAATGGTCATATGC-1	9	Myopeptidocytes2
GGGAATGTCAACGCTA-1	17	Archeocytes
GGGAATGTCCCGGATG-1	11	Myopeptidocytes1
GGGAATGTCCGTTGTC-1	22	Incurrent Pinacocytes2
GGGACCTGTAGCCTAT-1	26	Apendopinacocytes2
GGGACCTGTCTCCCTA-1	15	Archeocytes
GGGACCTGTTATCGGT-1	13	Archeocytes
GGGACCTGTTCGAATC-1	3	Archeocytes
GGGACCTGTTGTGGAG-1	9	Myopeptidocytes2
GGGACCTTCCACTCCA-1	13	Archeocytes
GGGACCTTCTACTCAT-1	13	Archeocytes
GGGAGATAGCCAGTTT-1	2	Archeocytes
GGGAGATCACAGTCGC-1	17	Archeocytes
GGGAGATGTGTAAGTA-1	2	Archeocytes
GGGAGATTCCACGTTC-1	6	Mesocytes 1
GGGAGATTCTTGAGAC-1	17	Archeocytes
GGGATGAAGACGACGT-1	11	Myopeptidocytes1
GGGATGAAGCCAGAAC-1	2	Archeocytes
GGGATGAAGTACGCCC-1	6	Mesocytes 1
GGGATGAGTAGCGCAA-1	3	Archeocytes
GGGATGATCCATGCTC-1	13	Archeocytes
GGGATGATCTAACTCT-1	22	Incurrent Pinacocytes2
GGGCACTCACTTAACG-1	12	Choanoblasts2
GGGCACTTCAAGGTAA-1	6	Mesocytes 1
GGGCACTTCGGACAAG-1	2	Archeocytes
GGGCATCAGAACTCGG-1	3	Archeocytes
GGGCATCAGAATAGGG-1	11	Myopeptidocytes2
GGGCATCAGAATTGTG-1	12	Choanoblasts2
GGGCATCAGATAGCAT-1	2	Archeocytes
GGGCATCGTCACCTAA-1	3	Archeocytes
GGGCATCTCCCACTTG-1	26	Apendopinacocytes2
GGGCATCTCGTTTATC-1	7	Choanoblasts1
GGGTCTGCACCGATAT-1	9	Myopeptidocytes2
GGGTCTGTCAACACCA-1	15	Archeocytes
GGGTCTGTCTGCAGTA-1	3	Archeocytes
GGGTCTGTCTTGGGTA-1	2	Archeocytes
GGGTTGCAGACCTTTG-1	3	Archeocytes
GGGTTGCAGTTGAGAT-1	13	Archeocytes
GGGTTGCGTACAGTGG-1	22	Incurrent Pinacocytes2
GGGTTGCGTTCAGCGC-1	11	Myopeptidocytes1
GGTATTGAGCCACCTG-1	9	Myopeptidocytes2
GGTATTGAGCCCTAAT-1	18	Archeocytes
GGTATTGAGCGAAGGG-1	4	Apendopinacocytes1
GGTATTGCACGAAACG-1	3	Archeocytes
GGTATTGGTCAGAAGC-1	22	Incurrent Pinacocytes2
GGTATTGTCATCGCTC-1	9	Myopeptidocytes2
GGTGAAGAGAGGACGG-1	23	Sclerocytes
GGTGAAGAGGCTAGAC-1	29	Mesocytes 2
GGTGAAGCAAGGTTCT-1	33	Mesocytes 3
GGTGAAGCATTCTCAT-1	6	Mesocytes 1
GGTGAAGGTAGCACGA-1	2	Archeocytes
GGTGAAGTCCATGCTC-1	3	Archeocytes
GGTGAAGTCCTAAGTG-1	17	Archeocytes
GGTGAAGTCTTGTACT-1	3	Archeocytes
GGTGCGTAGATAGCAT-1	14	Myopeptidocytes1
GGTGCGTAGGACCACA-1	7	Choanoblasts1
GGTGCGTAGGCATGTG-1	3	Archeocytes
GGTGCGTAGTTAGCGG-1	3	Archeocytes
GGTGCGTCAGTAGAGC-1	2	Archeocytes
GGTGCGTGTGACTCAT-1	19	Scleropharocytes
GGTGCGTGTTTGCATG-1	8	Choanocytes
GGTGCGTTCTTGACGA-1	5	Metabaloyctes1
GGTGTTAAGGAGTACC-1	17	Archeocytes
GGTGTTAAGGCTCAGA-1	10	Apopylar Cells
GGTGTTACAAGCCGTC-1	6	Mesocytes 1
GGTGTTAGTAATAGCA-1	13	Archeocytes
GGTGTTAGTTACCAGT-1	13	Archeocytes
GGTGTTAGTTACCGAT-1	2	Archeocytes
GTAACGTAGAGTGACC-1	5	Metabaloyctes2
GTAACGTGTCGGCACT-1	5	Metabaloyctes2
GTAACGTGTTAAAGAC-1	8	Choanocytes
GTAACGTTCCCTCAGT-1	6	Mesocytes 1
GTAACTGAGGTGCTTT-1	3	Archeocytes
GTAACTGAGTTCGATC-1	3	Archeocytes
GTAACTGCACGAGGTA-1	4	Apendopinacocytes1
GTAACTGCAGAGCCAA-1	15	Archeocytes
GTAACTGCATACAGCT-1	9	Myopeptidocytes2
GTAACTGCATGGGAAC-1	22	Incurrent Pinacocytes2
GTAACTGGTAGTACCT-1	10	Apopylar Cells
GTAACTGTCGGAGCAA-1	8	Choanoblasts2
GTACGTAAGACACGAC-1	15	Archeocytes
GTACGTAAGAGTACAT-1	10	Apopylar Cells
GTACGTAAGCGAAGGG-1	31	Lophocytes
GTACGTACACGCTTTC-1	8	Apopylar Cells
GTACGTAGTACTCTCC-1	3	Archeocytes
GTACGTAGTGATAAAC-1	9	Myopeptidocytes2
GTACGTAGTGCAACTT-1	12	Choanoblasts2
GTACTCCAGCGATCCC-1	19	Apendopinacocytes1
GTACTCCCACCTGGTG-1	2	Archeocytes
[truncated: 3,733 more rows]

## Sheet: Hydra vulgaris
Cell name	Leiden cluster	Cell type
01-D1_GCGCCCCATGAA	50	i_mgl
01-P2_CGGCCTTGGCGT	50	i_mgl
01-P2_TAATGTCATTTA	50	i_mgl
01-P2_TTTCCTTTATAC	50	i_mgl
01-P2_CGCGACACGGAN	50	i_mgl
01-P2_TTGTAGGTACCG	50	i_mgl
01-P2_TTCCCAGCGGCT	50	i_mgl
01-P2_CAGCGTAACAAG	50	i_mgl
01-P2_CAGCAAATTGTA	50	i_mgl
01-P2_ACACTCTCTGTG	50	i_mgl
02-CO_GCCAAAGATTTG	50	i_mgl
02-CO_TTGTTTTTGGTA	50	i_mgl
02-P1_GCCCGGACTTCN	50	i_mgl
02-P1_GCTCAAGCAAAC	50	i_mgl
02-P1_GTTGACGGGCTN	50	i_mgl
03-KI_AAAGATCCGCCC	50	i_mgl
03-MA_GGTTCTATGGCN	50	i_mgl
03-MA_GATTAGGGCCTC	50	i_mgl
03-MA_ATATTCTTCAGT	50	i_mgl
03-MA_TGGTCGATAAAC	50	i_mgl
03-MA_GCGGGCATAACC	50	i_mgl
03-MA_GCTAAAAGCCAC	50	i_mgl
03-MA_GCTAAAGCCACN	50	i_mgl
03-MA_CCTTAAAACGTA	50	i_mgl
03-MA_GCAGATCGTAAN	50	i_mgl
03-MA_ATCTGGTCTTAC	50	i_mgl
03-MA_CCCTATCCTGGG	50	i_mgl
03-MA_TGAATCTCCGCC	50	i_mgl
03-MA_AGGTAGGCCGGT	50	i_mgl
03-MA_AATGGCTCGACC	50	i_mgl
03-MA_GCAAGATCGTAA	50	i_mgl
03-MA_CTCCGCCCTCAN	50	i_mgl
03-MA_CTTGTAAAGCCN	50	i_mgl
03-MA_TGTTGAAAGGCC	50	i_mgl
03-MA_AATACTGATTGC	50	i_mgl
03-MA_GATTTTGTCTCG	50	i_mgl
03-MA_CTCGCGTGTTTA	50	i_mgl
03-MA_TGCGGCCGTCCC	50	i_mgl
03-MA_TTCAAAAACGTC	50	i_mgl
03-MA_CGCATTTTCCAC	50	i_mgl
03-MA_GAGGAGTACGGT	50	i_mgl
03-MA_TCCTGCTAGAGG	50	i_mgl
03-MA_CTTAGTAAAGCC	50	i_mgl
03-MA_AGGGGACTACTC	50	i_mgl
03-MA_GTACCACAGAGC	50	i_mgl
03-MA_ACTAGACCAGGA	50	i_mgl
03-MA_TGCAGTCCTGCC	50	i_mgl
03-MA_TGATCTCCGCCN	50	i_mgl
03-MA_GCCCTGAAACCA	50	i_mgl
03-MA_CCTTGGCTTATA	38	i_mgl
03-MA_CGCACTGATTAA	50	i_mgl
03-FM_CGCAAAAATTTT	50	i_mgl
03-FM_GAACAACTACCT	50	i_mgl
03-FM_GCGTCGGCACTC	50	i_mgl
03-FM_GCCCGTGACCGG	50	i_mgl
03-FM_AGGTTGGTCTTA	50	i_mgl
03-FM_TAATCATTGAGG	50	i_mgl
03-FM_CATCGGAACCGG	50	i_mgl
03-FM_TGGTTAATGATC	50	i_mgl
03-FM_CGCAAAATTTTN	50	i_mgl
03-FM_GCTGATGGGTCA	50	i_mgl
03-FM_CTAATGTTATGG	50	i_mgl
03-FM_GTAATAAAGTGG	50	i_mgl
03-FM_GTATAAAGTGGN	50	i_mgl
03-FM_CTATGTTATGGN	50	i_mgl
03-FM_GTCGGAGACTGG	50	i_mgl
03-FM_TCGATCTAGTGG	50	i_mgl
03-FM_CTAAACTCCTAG	50	i_mgl
03-FM_TGCGGCGACCCA	50	i_mgl
03-FM_ATATCCTGTGTT	50	i_mgl
06-FM_CCACCGCGGATG	50	i_mgl
06-MA_CCACTCCATCCN	50	i_mgl
06-MA_CCGGTGCCGTTC	50	i_mgl
06-MA_GGAGATCCTGTG	50	i_mgl
06-MA_TCAGTCGCTAAN	50	i_mgl
06-MA_CCTTTCTTGTAC	50	i_mgl
06-MA_TAACAGACAAAN	50	i_mgl
06-MA_CGCACGCTCGTC	50	i_mgl
06-MA_TACTTGCCGCGG	50	i_mgl
06-MA_TTACCTCCTGAT	50	i_mgl
06-MA_GGAGATCCTGCG	50	i_mgl
06-MA_ACGGATCGAAGG	50	i_mgl
06-MA_CGACCACAACAT	50	i_mgl
06-MA_GCAACTCACCCN	50	i_mgl
06-MA_ACAGCTGGACAA	50	i_mgl
06-MA_CAACCCACGGTC	50	i_mgl
06-MA_TTTCGAAGGTTT	50	i_mgl
06-MA_CAGGACTGGGAG	50	i_mgl
06-MA_GGCTCGTTTTGC	50	i_mgl
06-MA_GAGACCCTTTCA	50	i_mgl
06-MA_GCCTGTGATAGA	50	i_mgl
06-MA_ATGGTTATTTCG	50	i_mgl
06-MA_TTTAGCTATTCG	50	i_mgl
06-MA_GCAAACTCACCC	50	i_mgl
06-MA_TCCTACGCTGAA	50	i_mgl
06-MA_AGCTGCTGTTCG	50	i_mgl
06-MA_ACTCATATATAC	50	i_mgl
06-MA_TTTGCTATTCGN	50	i_mgl
06-MA_CCCAGTGTCGAA	50	i_mgl
06-MA_CCGGTTCCTTTG	50	i_mgl
06-MA_ATGGCTTCGTTN	50	i_mgl
06-MA_TCATAACTCGCC	50	i_mgl
06-MA_GAGCCCTTTCAN	50	i_mgl
06-MA_CGCCGCTCGTCN	50	i_mgl
06-MA_CCCGTGTCGAAN	50	i_mgl
06-MA_AAAGGCGTGCCT	50	i_mgl
06-MA_GACGACCACGTN	50	i_mgl
06-MA_CGGATTGTTCGA	50	i_mgl
06-MA_AATCGTATATAT	50	i_mgl
06-MA_CCAGAAACGCAA	50	i_mgl
06-MA_TTCTAGGTCAAG	50	i_mgl
06-MA_AGAAAGCAGCTG	50	i_mgl
06-MA_ATCTTAAGCCGC	50	i_mgl
06-MA_CACACCGGTGTG	50	i_mgl
06-MA_TTGCGTGAATGT	50	i_mgl
06-MA_TACTAATACATT	50	i_mgl
06-MA_GGCTATCCAAAT	50	i_mgl
06-MA_ACCGTAACGCCA	50	i_mgl
06-MA_GAAGTCTGCATN	50	i_mgl
06-MA_CACCCGGTGTGN	50	i_mgl
06-MA_TAGAAAGAACAG	50	i_mgl
06-MA_GAGATATGGTTA	38	i_mgl
06-MA_ATCTTACGATAC	50	i_mgl
06-MA_ATTGTAACTCTA	50	i_mgl
06-MA_AGGGCAAAGTCA	50	i_mgl
06-MA_TAGTTGTCCGCT	38	i_mgl
06-MA_CGCTTAGTTTAA	38	i_mgl
06-MA_GAGACGCCATGT	50	i_mgl
06-MA_CAAACCTCGAGG	50	i_mgl
06-MA_TTGGAAAAGCGG	38	i_mgl
06-MA_TGTATACATAGG	38	i_mgl
06-MA_CGGGGTGGATTG	50	i_mgl
06-MA_AATTACAAATAT	38	i_mgl
06-MA_TCTGACAACTAN	38	i_mgl
06-MA_TAGAAGAACAGN	50	i_mgl
06-MA_ATTCAAAAGCCC	38	i_mgl
06-MA_CCTATTTACTCT	38	i_mgl
06-MA_CCTCCATACACG	38	i_mgl
06-MA_GCAGATAGACTA	50	i_mgl
06-MA_ATTGGGCTGTAC	38	i_mgl
06-MA_TTTCCTGCGATA	38	i_mgl
06-MA_TGAACTCTCTTG	38	i_mgl
06-MA_AGATTAGGAAAT	50	i_mgl
06-MA_GGTCCATCAACC	38	i_mgl
06-MA_GCAGACGCTGTA	38	i_mgl
06-MA_CTCGTTATGAGT	38	i_mgl
06-MA_TCGCTTGCGTGC	38	i_mgl
06-MA_CATGGTGCGGGA	38	i_mgl
06-MA_CAACACCTATAC	24	i_mgl
06-MA_TTTATCGAATGG	50	i_mgl
06-MA_CGGAGGTGGCTC	38	i_mgl
06-MA_TTATACCAATCG	38	i_mgl
06-MA_AGTATTTTATTG	38	i_mgl
06-MA_CTGTAATGCTAA	50	i_mgl
06-MA_CAAACCGTCGAA	50	i_mgl
06-MA_CCAAAATTACAC	38	i_mgl
06-MA_AGTATACGACAA	50	i_mgl
06-MA_GCGACTACCAAG	38	i_mgl
06-MA_GACTTTGTACAA	38	i_mgl
06-MA_TTTTGCGAGCTG	50	i_mgl
06-MA_GGCGACGGACGA	38	i_mgl
06-MA_CAGGTCCGCATT	38	i_mgl
06-KI_ACAAGACGTCCG	50	i_mgl
06-KI_AGGCCGTACGGT	50	i_mgl
06-KI_GTCCAACTAAAG	50	i_mgl
06-KI_GTCGGGCAGGCT	50	i_mgl
06-KI_TAAGATTACCGA	50	i_mgl
06-KI_CGCCGGCTCACN	50	i_mgl
06-KI_CGCACGGCTCAC	50	i_mgl
06-KI_CATGACTACTAG	50	i_mgl
06-KI_AGCGTTTGAACT	50	i_mgl
06-KI_ACAGACGTCCGN	50	i_mgl
06-KI_TCATACCAATCG	50	i_mgl
06-KI_GGCGCTCCAGGT	50	i_mgl
06-KI_TGTAATATTAGA	50	i_mgl
11-PO_ATCCCGCGCCCG	50	i_mgl
11-PO_TCCATGCATATG	50	i_mgl
11-PO_TTTGGTGATACT	50	i_mgl
11-PO_CCGTGCGCGAGC	50	i_mgl
11-PO_ATGACAACGTTA	50	i_mgl
11-PO_TGTCAGCCGGGT	50	i_mgl
11-PO_CAGATACCTGCT	50	i_mgl
11-PO_CGACGGGGCATC	50	i_mgl
11-BU_GTGCAAGCTTCC	50	i_mgl
11-BU_TGACAGCCGCCT	50	i_mgl
11-BU_TCGGCGCAACAT	50	i_mgl
11-BU_CACCGCACCGGC	50	i_mgl
11-BU_ATGGACACGAAC	50	i_mgl
11-BU_ACTATCTGCCGA	50	i_mgl
02-PB_CAGCGCTCTCGT	38	i_mgl
03-MA_CACCTTCGGCTG	50	i_mgl
03-MA_CAGTATATGGCC	50	i_mgl
03-MA_GCTGAGGAAACC	50	i_mgl
03-MA_GCTTACTGGAGA	50	i_mgl
03-MA_CTCACGCCCTCA	50	i_mgl
03-MA_CATCGCTTCCAC	38	i_mgl
03-MA_CATTATAACCCG	38	i_mgl
03-MA_TCGGTACCGGAT	50	i_mgl
03-MA_CTCGTACCAAGA	50	i_mgl
03-MA_CTAGATGTCCGC	38	i_mgl
03-MA_CTGCCAGAAATG	38	i_mgl
03-MA_TTTTATATCATA	38	i_mgl
03-MA_ATTCACGGGAAC	38	i_mgl
03-MA_GACAACGATTCC	50	i_mgl
03-MA_ATTTGGAAGTCA	50	i_mgl
03-MA_CCCCCCTGTAGG	38	i_mgl
03-MA_TATCAGGCCACT	38	i_mgl
03-MA_GACCGCACCGTT	50	i_mgl
03-MA_CGGACCCTCTGC	38	i_mgl
03-MA_GGGCTTTCTGTC	38	i_mgl
03-MA_AAGTGCAGACAC	38	i_mgl
03-MA_TGGAACTTGTTC	38	i_mgl
03-MA_AGCTAACTTATC	38	i_mgl
03-MA_CAACAAAATCCT	38	i_mgl
03-MA_GGAACGGCTTAC	38	i_mgl
03-MA_AACTATGTAGAC	38	i_mgl
03-MA_GCCTCAGGTCTC	38	i_mgl
03-MA_TGATGAATTCAC	38	i_mgl
03-MA_ACAGTAAAGTTC	38	i_mgl
03-MA_AGGTGTTACCAT	38	i_mgl
03-MA_AAATCAAGTCAG	38	i_mgl
03-MA_CCGCAGCTTGGA	38	i_mgl
03-MA_GTCACACCAGGG	38	i_mgl
03-MA_CCGCAGGTGAGA	38	i_mgl
03-MA_AAACCAAAGACT	38	i_mgl
03-MA_TTATAGCAACCA	38	i_mgl
03-MA_ATTTGTTGAGAT	38	i_mgl
03-MA_GTTTCTCCTGCA	38	i_mgl
03-MA_CCAGGTCTCATC	38	i_mgl
03-MA_TCTGCTCTCATT	38	i_mgl
03-MA_GATCTCTAATCG	38	i_mgl
03-MA_TCGGTTATGTAA	38	i_mgl
03-MA_TGGCGTGTATTT	38	i_mgl
03-MA_TCACTCTCGGCG	38	i_mgl
03-MA_AGCCTCCATGCT	38	i_mgl
03-MA_CCCGAGGTCAAG	38	i_mgl
03-MA_GTGGTCTTGTCT	38	i_mgl
03-MA_CCTTTCGGGGCT	38	i_mgl
03-MA_CTGTCCAAGTAC	38	i_mgl
03-MA_CCTCTTTATGTC	38	i_mgl
03-MA_CCCGCTGCCCCC	38	i_mgl
03-MA_CAGTAAGCCTTT	38	i_mgl
03-MA_CCTTGCCAGCCT	38	i_mgl
03-MA_CTAGACGGTTTT	38	i_mgl
03-MA_TCCTGGAATTGC	38	i_mgl
03-MA_AGACAACCTTGT	38	i_mgl
03-MA_ATCTCTTACCAC	38	i_mgl
03-MA_GCTCGACCCAGG	38	i_mgl
03-MA_GCAATTAAATGT	38	i_mgl
03-MA_CCCCCATTAACT	38	i_mgl
03-MA_ACAACTATATAG	38	i_mgl
03-MA_TTTCGACTCACG	38	i_mgl
03-MA_TGTCATACTTTA	38	i_mgl
03-MA_AATCCAGTCTCC	38	i_mgl
03-MA_ATAGCCTCAAGT	38	i_mgl
03-FM_TGTGCCGACCCA	50	i_mgl
03-FM_ATTGGGTCACAA	50	i_mgl
03-FM_CACTATTTAAGA	50	i_mgl
06-FM_GTGCCGGTAGCG	38	i_mgl
06-MA_TGATTCTTCCCT	50	i_mgl
06-MA_CTGCCTACGTGG	50	i_mgl
06-MA_CACGCACAGCCA	50	i_mgl
06-MA_CGGCGAGAGTAA	50	i_mgl
06-MA_TTCGCCGCCTTT	50	i_mgl
06-MA_AGTTCGTGTTTC	50	i_mgl
06-MA_CAATCCTATCAC	50	i_mgl
06-MA_TTCAACTACGAN	50	i_mgl
06-MA_CCGTCCAGAATG	50	i_mgl
06-MA_ATTCAATCGCCT	50	i_mgl
06-MA_GCTGAGCGGGTT	50	i_mgl
06-MA_CTGACCATTCTA	50	i_mgl
06-MA_ACATGTTGCAGC	50	i_mgl
06-MA_CTGGTTCCGATC	50	i_mgl
06-MA_CGGCTTCACAAT	50	i_mgl
06-MA_TACCATCGCCAA	50	i_mgl
06-MA_CACTTTCCCCCA	50	i_mgl
06-MA_TTTCGACCCACA	38	i_mgl
06-MA_AAGTTCCATTAA	50	i_mgl
06-MA_CCTTGGGCAGCC	50	i_mgl
06-MA_ATGCAGAAACAA	50	i_mgl
06-MA_GCTTAACCGATG	38	i_mgl
06-MA_TGCCCGAGTTCA	50	i_mgl
06-MA_CCACAACACGAG	50	i_mgl
06-MA_TGGGCTTCGTCC	50	i_mgl
06-MA_CATTAATTCTAT	50	i_mgl
06-MA_ATCCCGTATGGC	50	i_mgl
06-MA_TCTGTGGCATAG	50	i_mgl
06-MA_TCGCTCTCGAAC	50	i_mgl
06-MA_TGGCCATTCCGT	50	i_mgl
06-MA_GAGGAGGCAGAC	50	i_mgl
06-MA_ACCGTAGCCTGA	38	i_mgl
06-MA_CGGCTGACGCCC	38	i_mgl
06-MA_CCGGACCGAATG	38	i_mgl
06-MA_AGCCACCCGCTT	50	i_mgl
06-MA_TAGTTGATATGG	50	i_mgl
06-MA_CCCCTCGTCCAC	50	i_mgl
06-MA_GCACGGGCTAAC	50	i_mgl
06-MA_GTCAGCCATGCA	38	i_mgl
06-MA_GGTTCCAACCCT	50	i_mgl
06-MA_CCTCGTACGTCT	50	i_mgl
06-MA_CTAGAATGGCTC	50	i_mgl
06-MA_ATCGCGAGACAT	38	i_mgl
06-MA_AAGGCCACTGAC	50	i_mgl
06-MA_AAAAGTGCATTA	50	i_mgl
06-MA_CAAGTTCGTGTA	38	i_mgl
06-MA_GCTTAGTTTTAC	38	i_mgl
06-MA_ACATTTGATGTC	50	i_mgl
06-MA_TCCGTTAGGTGA	38	i_mgl
06-MA_CCGTGATTGCTC	50	i_mgl
06-MA_CAAGACCTCAAC	38	i_mgl
06-MA_CCCCTTCACAGT	38	i_mgl
06-MA_GAAGTCCTTCTC	38	i_mgl
06-MA_CATCACTCTTAA	50	i_mgl
06-MA_TGGGGTCTGTTA	50	i_mgl
06-MA_GCTCATCTCGTT	50	i_mgl
06-MA_ATATGTCCTTAA	38	i_mgl
06-MA_GCAGAAGATAGG	38	i_mgl
06-MA_GAGCACGGTTCT	38	i_mgl
06-MA_AGTCACGCAGCC	38	i_mgl
06-MA_AAGAAACACATA	38	i_mgl
06-MA_GCGCATCCGTAG	38	i_mgl
06-MA_ACCTAACATGAC	38	i_mgl
06-MA_GTCGATTCTCTG	38	i_mgl
06-MA_TAGTACATCCTC	38	i_mgl
06-MA_TCGCACATTGCG	38	i_mgl
06-MA_TACTTTATCTAG	38	i_mgl
06-MA_ATCTCCTCGGCT	38	i_mgl
06-MA_CCAGCTAATCCA	38	i_mgl
06-MA_GAGTTCTGAGCA	38	i_mgl
06-MA_CCGCGAATGATT	38	i_mgl
06-MA_CCTGTGTTAATA	38	i_mgl
06-MA_TGCCCTGCCCTG	38	i_mgl
06-MA_AACCTTCATCCN	38	i_mgl
06-MA_CTGCCATTCTAN	38	i_mgl
06-MA_TAACGTGACTAC	38	i_mgl
06-MA_CTCGAGTGTGTA	38	i_mgl
06-MA_CCAGTTCTAGCT	38	i_mgl
06-MA_ATGCCAGCGTGT	38	i_mgl
06-MA_AGAACCCGGTTC	38	i_mgl
06-MA_GTAGATATTGCG	38	i_mgl
06-MA_GACATTGTCCCG	38	i_mgl
06-MA_GCTTCACCTCAC	38	i_mgl
06-MA_TTACACGGAGCA	38	i_mgl
06-MA_TCCCGCAGTTCG	38	i_mgl
06-MA_TGACGGGGATTA	38	i_mgl
06-MA_AGTGCCATCCAA	38	i_mgl
06-MA_CAGTAACCCACC	38	i_mgl
06-MA_CGTTGACACGCA	38	i_mgl
06-MA_GAAGATTAGAAA	38	i_mgl
06-MA_AGGCTGGGAATN	38	i_mgl
06-MA_GGTCCTGACACG	38	i_mgl
06-MA_TCGCCGGTGCTG	38	i_mgl
06-MA_ACTAGGAATTTA	38	i_mgl
06-MA_GGTGATTCCGAC	38	i_mgl
06-MA_AAAGAATTTTGC	38	i_mgl
06-MA_GCCAATCTTTCG	38	i_mgl
06-MA_CCCCACAGCTAC	38	i_mgl
06-MA_TATGATTCACCG	38	i_mgl
06-MA_CACGCGGCCCTG	38	i_mgl
06-MA_ACTCCGCCGATC	38	i_mgl
06-MA_CGATCCCTTCTT	38	i_mgl
06-MA_CAGCTTTTAACG	38	i_mgl
06-MA_AAGCGCCAGTGT	38	i_mgl
06-MA_TTTCATTACAAA	38	i_mgl
06-MA_TCCGATTTCTTG	38	i_mgl
06-MA_GTTGCGACGCAT	38	i_mgl
06-MA_CTCGATGTGTCT	38	i_mgl
06-MA_CCTCCCTTTAGA	38	i_mgl
06-MA_CGCATCGGCTTT	38	i_mgl
06-MA_TTCTGCCGTTCG	38	i_mgl
06-MA_GACCTGCATATG	38	i_mgl
06-MA_CCTCGTCTATTT	38	i_mgl
06-MA_AACCAACGCGGA	38	i_mgl
06-MA_AAATAGACATGT	38	i_mgl
06-MA_AGAAGGCGGATT	38	i_mgl
06-MA_GCGGATGTAAAG	38	i_mgl
06-MA_AAGGTCTACATT	38	i_mgl
06-MA_GGGCTTGTGGGG	38	i_mgl
06-MA_CTCCGTGGAGAT	38	i_mgl
06-MA_ATGGCCCCGTTC	38	i_mgl
06-MA_TACTCTGACTGN	38	i_mgl
06-MA_GCCTTCAGGCGG	38	i_mgl
06-MA_ACCCAACATGGA	38	i_mgl
06-MA_AGTACGACTCGA	38	i_mgl
06-MA_ATGCCCCAAACG	38	i_mgl
06-MA_GATGCAACCGTC	38	i_mgl
06-MA_TCTCAGAATACT	38	i_mgl
06-MA_GACGTATCGATC	38	i_mgl
06-MA_CTTCCACAGAGA	38	i_mgl
06-MA_CGGCAGTTTTTT	38	i_mgl
06-MA_CTCTGATCCAAG	38	i_mgl
06-MA_TTGCCAGTTCCT	38	i_mgl
06-MA_AACCTCATACAA	38	i_mgl
06-MA_ATCTTAAAGTCT	38	i_mgl
06-MA_ATAAAGAGCAGT	38	i_mgl
06-MA_CACGATCCGCCT	38	i_mgl
06-MA_TGTAGCCCCGCC	38	i_mgl
06-MA_CTAGGTCCGACC	38	i_mgl
06-MA_ATTTCGGCGGTT	38	i_mgl
06-MA_CGAGGTGAACAA	38	i_mgl
06-MA_TGAGCCATTTGT	38	i_mgl
06-MA_TGAGGCTGCTAA	38	i_mgl
06-MA_GTTCAGCTGAAT	38	i_mgl
06-MA_GGTGATAACCGT	38	i_mgl
06-MA_GCGTACTATAGT	38	i_mgl
06-MA_AGAGCTTCCCAT	38	i_mgl
06-MA_GCTTATCGCCGT	38	i_mgl
06-MA_TGGCATCAAGTT	38	i_mgl
06-MA_TACGAGATGACA	38	i_mgl
06-MA_CCCCTGCCCACA	38	i_mgl
06-MA_GCCTCCTTCTAA	38	i_mgl
06-MA_TGTTAACGTAAC	38	i_mgl
06-MA_AAGGCGTACCGT	38	i_mgl
06-MA_CTCTTCATGATT	38	i_mgl
06-MA_CCAGTTAATAGC	38	i_mgl
06-MA_ATCTCCTTGGAT	38	i_mgl
06-MA_CAGGTTTTAGGG	38	i_mgl
06-MA_GCAGACACACCA	38	i_mgl
06-MA_GAACACGCTGTG	38	i_mgl
06-MA_GGGCCACATAGC	38	i_mgl
06-MA_ATGCCCCCTTGT	38	i_mgl
06-MA_GGCTGCCAGCCA	38	i_mgl
06-MA_GGACAATAGTGG	38	i_mgl
06-MA_GTACTTCACGGT	38	i_mgl
06-MA_GTCGTCACGCGG	38	i_mgl
06-MA_CTTCACGGGCAG	38	i_mgl
06-MA_CGTGAACTACTT	38	i_mgl
06-MA_TCGTACAAAGTA	38	i_mgl
06-MA_GGGCATCCCTTA	38	i_mgl
06-MA_CCAGCTATCTAC	38	i_mgl
06-MA_CTCGGTATACCC	38	i_mgl
06-MA_AGTTATAAAAGT	38	i_mgl
06-MA_CCTTGGCGATTG	38	i_mgl
06-MA_TATCAACCCCAC	38	i_mgl
06-MA_ATAGAGACCATG	38	i_mgl
06-MA_TGCTCAAATGGC	38	i_mgl
06-MA_AAACGCTGAAGT	38	i_mgl
06-MA_TTTCACTATCGG	38	i_mgl
06-MA_CGCCCGCACTCT	38	i_mgl
06-MA_CTAACCATGAAG	38	i_mgl
06-MA_ATATTACGCTTA	38	i_mgl
06-MA_GTCGCCATGCAN	38	i_mgl
06-MA_GTTTTTTTGAAT	38	i_mgl
06-MA_AAGCGGATCCGT	38	i_mgl
06-MA_GAATTGATATAC	38	i_mgl
06-MA_AATTTTATCCGC	38	i_mgl
06-MA_CCGTCCCAAGAG	38	i_mgl
06-MA_CTGGCGCTGTCG	38	i_mgl
06-MA_AAAATGTGGAGA	38	i_mgl
06-MA_GCCGACTGGGCC	38	i_mgl
06-MA_CAGTGGATGGCG	38	i_mgl
06-MA_CCGCTAGAGACA	38	i_mgl
06-MA_AATTTGGGAGGT	38	i_mgl
06-MA_GCTGCACCTGTC	38	i_mgl
06-MA_CCGTGAGGAGGC	38	i_mgl
06-MA_GCAAAGGATGTC	38	i_mgl
06-MA_TTGTTAAATGCG	38	i_mgl
06-MA_ACTCACTTGTGA	38	i_mgl
06-MA_TTCGAGGGTCAC	38	i_mgl
06-MA_ATAGGAGTGGGT	38	i_mgl
06-MA_CGCCTCCCACGA	38	i_mgl
06-MA_GTACGCGCCCAT	38	i_mgl
06-MA_TCGAAGCTACGG	38	i_mgl
06-MA_GGGAAGGTCCAG	38	i_mgl
06-MA_CGTGAGTCAATA	38	i_mgl
06-MA_GTCGCCTTATCT	38	i_mgl
06-MA_GCGTAAGACTAT	38	i_mgl
06-MA_GCCCATAAACTA	38	i_mgl
06-MA_GCCGTCGCTTTC	38	i_mgl
06-MA_CGTCGCTGCATA	38	i_mgl
06-MA_GACTAGATTGTG	38	i_mgl
06-MA_ACCATAATTTGA	38	i_mgl
06-MA_GATTCACGCTGG	38	i_mgl
06-MA_CTCTAGAAGTAG	38	i_mgl
06-MA_TATCGGTGCGCG	38	i_mgl
06-MA_TCTTTTAATGGG	38	i_mgl
06-MA_ACGTCGAGGTCC	38	i_mgl
06-MA_TATCTACATAGT	38	i_mgl
06-MA_GAGAGGATTTAT	38	i_mgl
06-MA_AAAGGATTAATT	38	i_mgl
06-MA_AGCAACGTCTCT	38	i_mgl
06-MA_GATCCGAAGGAT	38	i_mgl
06-MA_ATTGACATCGAT	38	i_mgl
06-MA_GCAGCTTACACG	38	i_mgl
06-MA_AGTGCGCCCTGT	38	i_mgl
06-MA_GGCTGATTAACG	38	i_mgl
06-MA_CGCTAAAGGCAC	38	i_mgl
06-MA_ATCTTATATCTT	38	i_mgl
06-MA_TGCTCGTTTAAA	38	i_mgl
06-MA_GCGACCATGCGG	38	i_mgl
06-MA_GCGTCGCAGAGT	38	i_mgl
06-MA_GGGCACCACGTA	38	i_mgl
06-MA_CTCCTAGGCCTG	38	i_mgl
06-MA_TCAGTTCCAATC	38	i_mgl
06-MA_AGCCACCATACT	38	i_mgl
06-MA_TCATTCGGCAAA	38	i_mgl
06-MA_ACTGTATCCTAA	38	i_mgl
06-MA_GGCACGATGCCA	38	i_mgl
06-MA_GCTCGGTTCTAG	38	i_mgl
06-MA_CGCTTCATAAAA	38	i_mgl
06-MA_AATCTCAATTAT	38	i_mgl
06-MA_AATGGCACCCCG	38	i_mgl
06-MA_CCATGTGTCTAC	38	i_mgl
06-MA_AGACATTCCGCT	38	i_mgl
06-MA_TCACATATTTTA	38	i_mgl
06-MA_ACTAATTTGGTT	38	i_mgl
06-MA_GTATGCAATGCG	38	i_mgl
06-MA_CCTGGCTGACGA	38	i_mgl
06-MA_TTTTCCCGGAGT	38	i_mgl
06-MA_GTTTCTGCTTAA	38	i_mgl
06-MA_CTGTAAATATTG	38	i_mgl
06-MA_TCGCAATCCTCG	38	i_mgl
06-MA_TGCCTGGGTTAT	38	i_mgl
06-MA_CGTGCCTCTGTC	38	i_mgl
06-MA_GCAGCGTGTTGG	38	i_mgl
06-MA_TTGTGACCCGCA	38	i_mgl
06-MA_GTGCTTCGTGGA	38	i_mgl
06-MA_TAACACCTCCGA	38	i_mgl
06-MA_TCGAACTTAACG	38	i_mgl
06-MA_TATGCAGTCGTT	38	i_mgl
06-MA_TCGTACTACAGG	38	i_mgl
06-MA_CTTGTGCTGCCT	38	i_mgl
06-MA_GGTACGTACTCT	38	i_mgl
06-MA_CTTCAGAGAGGG	38	i_mgl
06-MA_TGACAACACCTC	38	i_mgl
06-MA_AACGGTTCGGAA	38	i_mgl
06-MA_CACGGAAACCAA	38	i_mgl
06-MA_CTGCCCGAAGAA	38	i_mgl
06-MA_GATCGGTCGGAC	38	i_mgl
06-MA_GTGATTTCTCCT	38	i_mgl
06-MA_CGTCAAGTATGC	38	i_mgl
06-MA_CCGTTTTATTAT	38	i_mgl
06-MA_ACAGCTTGTAGA	38	i_mgl
06-MA_GCCGCACCACTT	38	i_mgl
06-KI_CCGGATTTCCAG	38	i_mgl
01-D1_TGCAGCCTAAAT	58	i_nb3
01-D1_TTCGCCAGATCG	45	i_nb4
01-D1_CACACTCAGCTT	45	i_nb4
01-D1_ATTGAGTGTCTT	45	i_nb4
01-P2_AAACATTAGCGT	42	i_nb4
01-P2_ACATTGTATACA	54	i_nb4
01-P2_AGCCCCCGAGTN	45	i_nb4
02-CO_CTCGTTGAGACT	45	i_nb4
02-CO_CCGGGCGACAAG	45	ecEp_nem1(pd)
02-CO_GGAGCTCGAACA	54	i_nb4
02-CO_GTAAGCTCCAAA	45	i_nb4
02-CO_CGTGCCCGTATT	45	i_nb4
02-CO_GCACCGCGCTGT	54	i_nb4
02-CO_GTTTGCGTCATC	45	i_nb4
02-CO_CTTTTTCGGGAT	45	i_nb4
02-CO_CTGCCCGGTCAN	45	i_nb4
02-CO_TGTCGGAGTATN	45	i_nb4
02-CO_ACATTCTTACAN	40	i_nb4
02-CO_TGCTTCCGTGAG	54	i_nb4
02-CO_GATTAGCAGTAA	45	i_nb4
02-CO_TTGTTACATCGG	45	i_nb4
02-CO_CATCGTACCCCG	45	i_nb4
02-CO_CAGTTAGTCATG	45	i_nb4
02-CO_CGCGTGTTCGCC	45	i_nb4
02-CO_AGAATTAGCTCA	45	i_nb4
02-CO_ACGCCAATCGTC	45	i_nb4
02-CO_CCGTTGGCAGGG	45	i_nb4
02-CO_CAAAGATTCGCN	45	i_nb4
02-CO_GGGCCTTTGTAN	45	i_nb4
02-CO_CCGTTGCAGCAG	45	i_nb4
02-CO_TTGTGCCGGTAG	45	i_nb4
02-CO_CGTCTAAGTTTN	45	i_nb4
02-CO_TATTTATCATCG	45	i_nb4
02-CO_GACTAATACATT	45	i_nb4
02-CO_AAATGTCACAGT	45	i_nb4
02-CO_CTGTGAGTGGTG	45	i_nb4
02-CO_TTCCAATGCCTT	45	i_nb4
02-CO_AGAAGGTGGGAG	54	i_nb4
02-CO_GCGGCGGCGAAA	45	i_nb4
02-CO_AACAGTAGTGGC	45	i_nb4
02-CO_TGTCTCTAGTTG	45	i_nb4
02-CO_TTCTGGCCCGGT	45	i_nb4
02-CO_CAGTTGTTCGCN	45	i_nb4
02-P1_ATCGTCAAGAAN	42	i_nb4
02-P1_ACGGGTTTGGGC	42	i_nb4
02-P1_GTAGGCAGCAAG	45	i_nb4
02-P1_ATCTTCAGGCAA	54	i_nb4
02-P1_GGAAGAGCCGGT	45	i_nb4
02-P1_TGTGGACATTTC	45	i_nb4
02-P1_GCGACGTGATTC	45	i_nb4
02-P1_CCAATTCCTGCT	45	i_nb4
02-P1_GTGGGAAGGCAC	54	i_nb4
02-P1_CCTTGCGTTCCN	45	i_nb4
02-P1_CGCTAGAAAAAT	45	i_nb4
02-P1_ATAAGCCTCGCA	45	i_nb4
02-P1_GCGTAGACTCCG	45	i_nb4
02-P1_TAATTTTCGATT	45	i_nb4
02-P1_AAACATTAGTAA	45	i_nb4
02-P1_ACTATCCACCGG	45	i_nb4
02-P1_CAATTCCTCAGT	45	i_nb4
02-P1_GGACGACCTCAA	45	i_nb4
02-PB_CGGGTCGGGCGA	65	ecEp_nem1(pd)
02-PB_AAATTTTTCTCT	45	i_nb4
02-PB_CGCCGTTCCGCA	45	i_nb4
02-PB_CTGGATGACTAA	45	i_nb4
02-PB_CCCGGCAGTTGA	45	i_nb4
02-PB_CAGATGGGTTAT	45	i_nb4
02-PB_GGAGGGTTTCAT	45	i_nb4
02-PB_GCTGTCCACGCA	54	i_nb4
02-PB_CGGATGTGCATA	54	i_nb4
02-PB_GGAGCCAGAACT	45	i_nb4
03-KI_ATACATGGACTC	58	i_nb4
03-KI_GCCGCCAAGATG	54	i_nb4
03-KI_ATCGTGGTATTT	54	i_nb4
03-KI_TCAGAGCGGTTC	45	i_nb4
03-KI_ATTTCACGCTAA	45	i_nb4
03-KI_CAGCTTGCGCCA	54	i_nb4
03-KI_ACTGGAACGCTT	45	i_nb4
03-KI_TAGCCGCCGGCA	54	i_nb4
03-KI_AATAAATCGTCA	45	i_nb4
03-MA_GGGATTAGGTGC	45	i_nb4
03-MA_GGTTAATGCCCT	45	i_nb4
03-FM_GAGTCCAGTGAC	45	i_nb4
03-FM_GCGTCCGACGCT	54	i_nb4
03-FM_CAGGAGACTCGN	54	i_nb4
03-FM_GCAGGCTTAATA	45	i_nb4
03-FM_CAGTAGAACCAC	54	i_nb4
03-FM_ACCCTATCTGAC	45	i_nb4
03-FM_GACGTATGAGTG	45	i_nb4
03-FM_CCCCCCTGTCGC	45	i_nb4
03-FM_GCGGAATCGGGT	45	i_nb4
03-FM_CTGATATGCCCC	54	i_nb4
03-FM_TTAAACACATCC	45	i_nb4
03-FM_ATGTGCAGCGCG	54	i_nb4
06-FM_GCCCGCCATCCT	42	i_nb4
06-FM_GAATTCTTGTGA	42	i_nb4
06-FM_TAACAGTCCTAA	45	i_nb4
06-KI_GTGCTCAGCAAC	65	ecEp_nem1(pd)
06-KI_CGCCTTTTCTAA	45	i_nb4
06-KI_CCTCAGACCCCC	45	i_nb4
06-KI_GCCTTTTACATT	54	i_nb4
06-KI_TTCGTCTTACAT	54	i_nb4
06-KI_GCCCACTCCGCC	54	i_nb4
06-KI_TCTCGCGCGCGT	54	i_nb4
06-KI_ATCCGGCAGCGC	54	i_nb4
06-KI_ATTTGCCCGATG	54	i_nb4
06-KI_GGCTCCGACACC	54	i_nb4
06-KI_GCCTACCTAGAA	45	i_nb4
06-KI_ATCGTCTGGTTT	54	i_nb4
06-KI_GTTATCCTATTT	45	i_nb4
06-KI_TTTTATTAAAGA	45	i_nb4
06-KI_ATCTTCTTGATC	45	i_nb4
06-KI_TAACGGCTGTTG	45	i_nb4
06-KI_GGCTCCTTCAAG	45	i_nb4
06-KI_TGACCGAGACAC	54	i_nb4
06-KI_GTATTCCCCCTC	45	i_nb4
06-KI_TGAAATTCTCTA	54	i_nb4
06-KI_CTAGATGCCACC	45	i_nb4
06-KI_CCCTGGGGGGCC	45	i_nb4
06-KI_TAAGTTCGTTCG	45	i_nb4
06-KI_CACGGGATACAC	54	i_nb4
06-KI_ATAGAAGCTTAT	45	i_nb4
06-KI_TCTCGTTCGACA	45	i_nb4
06-KI_AGGCGCGATCCG	45	i_nb4
06-KI_GATTCATAAGAC	45	i_nb4
06-KI_TCTGGCGGTATG	54	i_nb4
06-KI_GAGTAGGTTTGA	54	i_nb4
06-KI_TCACGCGATTCA	45	i_nb4
06-KI_GTTTCAGTCCCT	45	i_nb4
06-KI_AACGCGCTCACC	45	i_nb4
06-KI_CTCGCGCCGTAG	45	i_nb4
06-KI_CAGGCTAGCGAG	54	i_nb4
06-KI_ATTTCCCGAGAG	45	i_nb4
06-KI_GGATTCTTAGTG	45	i_nb4
06-KI_CGGCCCCCAACT	45	i_nb4
06-KI_CCACAGATGTTC	45	i_nb4
06-KI_TGTTGAGATGTC	54	i_nb4
06-KI_ATCCTCTTAACA	45	i_nb4
11-PO_TTAGGCCCGTCA	54	i_nb4
11-PO_GTGATACACCCG	42	i_nb4
11-PO_CTAAAGTTTATA	42	i_nb4
11-PO_GAGACCTCGGTA	58	i_nb4
11-PO_CCGCCTCCTGCC	45	i_nb4
11-PO_CACGACTTTTTT	45	i_nb4
11-PO_AATTAGCCACTA	45	i_nb4
11-PO_CCTATTTCCAAT	45	i_nb4
11-PO_TTCTAGCTGGCA	45	i_nb4
11-PO_TTGCAGCCTGTA	45	i_nb4
11-PO_CCTAGCTTGCAA	54	i_nb4
11-PO_AAACGCATTTGA	54	i_nb4
11-PO_TGGCATATTCTC	54	i_nb4
11-PO_CCCTTTAGCAGC	54	i_nb4
11-PO_CTCAGCCGGTGC	45	i_nb4
11-PO_GAAGCCCCACAC	45	i_nb4
11-PO_ACTTTGACCGGT	45	i_nb4
11-PO_TAGGCTATATTT	54	i_nb4
11-PO_TATACCCGTACT	45	i_nb4
11-PO_CGAATCTACGTG	54	i_nb4
11-PO_GAAAAGAGGCTT	45	i_nb4
11-PO_ATGGCCACTAGG	45	i_nb4
11-PO_ATACCACCCGAT	45	i_nb4
11-PO_CATTACCCGCCT	54	i_nb4
11-PO_AATTTTACAGTG	45	i_nb4
11-PO_CGAAACCATCCT	45	i_nb4
11-PO_AGCTCCCCCGCG	54	i_nb4
11-PO_ACGGACACTTAG	45	i_nb4
11-PO_GTACATAAGGTG	54	i_nb4
11-PO_CGCTTGTGTCGA	45	i_nb4
11-PO_ATAGCGCATTTA	45	i_nb4
11-PO_GCAGAGTCACAG	54	i_nb4
11-PO_AGCTTGACACAA	45	i_nb4
11-PO_TCTTTCAAGATC	45	i_nb4
11-PO_ACCACAACTCCT	45	i_nb4
11-PO_TGTTCCCTCTCT	45	i_nb4
11-PO_GGGTCTAGGGTG	45	i_nb4
11-PO_ACTCCCAAGCAA	45	i_nb4
11-PO_CCCGGCCGTTGG	45	i_nb4
11-PO_TAATCTTTGATC	45	i_nb4
11-PO_TCGCTGCCTATC	45	i_nb4
11-PO_CCCGGTAAATGC	54	i_nb4
11-PO_GATAACGCACTC	54	i_nb4
11-PO_ACGCTTTTGCCG	54	i_nb4
11-PO_ATTCGCGTCGAC	54	i_nb4
11-PO_ACCCACGCCGAA	54	i_nb4
11-PO_GTTAATTAACGG	45	i_nb4
11-PO_GCGCACGAACTT	45	i_nb4
11-PO_GGCCGACAGCAC	45	i_nb4
11-PO_GGCTCGACTGCC	54	i_nb4
11-PO_GTATTCGCATTG	54	i_nb4
11-PO_ACTTTCGGCCCA	45	i_nb4
11-PO_CTTTTTAGTGTG	54	i_nb4
11-PO_GCTTTCTCCATG	45	i_nb4
11-PO_GGTCATCAGGGC	45	i_nb4
11-PO_TCCCGAGGCACT	45	i_nb4
11-PO_GTGTCAATTCTC	45	i_nb4
11-PO_GCTTAGTGTCGA	54	i_nb4
11-PO_AAAAGTCAGAGC	54	i_nb4
11-PO_GGCGATAGAACG	45	i_nb4
11-PO_AATAAGGAATCG	45	i_nb4
11-PO_TGCTATGTGGAG	45	i_nb4
11-PO_AATGATAAGTGT	54	i_nb4
11-PO_TCAACAGTGTAA	45	i_nb4
11-PO_CCTATTTTCTGT	54	i_nb4
11-PO_TGGTGTGCTATG	45	i_nb4
11-PO_GTGTAGATATTT	45	i_nb4
11-PO_CAGATAACCTAA	45	i_nb4
11-PO_CTTGTTTTCCAT	45	i_nb4
11-PO_ATGCACATTCGA	45	i_nb4
11-PO_CGATTGAAGGTC	45	i_nb4
11-PO_TCTCTTACTCTT	54	i_nb4
11-PO_CGTAAACCGAGT	54	i_nb4
11-PO_TGGTAAATTGCT	45	i_nb4
11-PO_CCGGCGGGCTGC	45	i_nb4
11-PO_AATGCCAGCGTA	45	i_nb4
11-PO_ACCTCTTAGGGC	54	i_nb4
11-PO_GCGAGCAGGCCC	54	i_nb4
11-PO_GAAGGGCAAACG	45	i_nb4
11-PO_ACAGCAAAGCAA	45	i_nb4
11-PO_GCGGGCGTGAAC	45	i_nb4
11-PO_CAGGAAAAAGCC	54	i_nb4
11-PO_ACTATTACATTG	45	i_nb4
11-PO_TTCCCGAGACAT	45	i_nb4
11-PO_TCTGTAGTGAAC	45	i_nb4
11-PO_ACTGGCCCGTCA	45	i_nb4
11-PO_GGGTGGACATGT	45	i_nb4
11-PO_CGAAACAGCACA	54	i_nb4
11-PO_TAAACAGTGGCC	45	i_nb4
11-PO_TAGTTATCATGT	45	i_nb4
11-PO_GTCAAGGACGGC	54	i_nb4
11-PO_ATCTATGATTTA	45	i_nb4
11-PO_GCCGGAGTAAGC	54	i_nb4
11-BU_TACGCCGACCGG	58	i_nb4
11-BU_CTCGCAGGGCAT	54	i_nb4
11-BU_CATCTATGGCGC	45	i_nb4
11-BU_CCCCACTTAGAT	45	i_nb4
11-BU_CTTAAGTGAGAA	45	i_nb4
11-BU_AAACATCGGTGT	54	i_nb4
11-BU_CAACCGTTTATA	54	i_nb4
11-BU_GCAATCTACCTA	54	i_nb4
11-BU_CAGAAGTCTACT	54	i_nb4
11-BU_GAACCGTTCTCG	45	i_nb4
11-BU_CCCCGACATTCC	45	i_nb4
11-BU_CTCCCACTGCAG	45	i_nb4
11-BU_CTAACGCATTCT	45	i_nb4
11-BU_ACGGATACCGGT	54	i_nb4
11-BU_TTTGTGGCACAA	45	i_nb4
11-BU_ACCCTAGCTTCT	45	i_nb4
11-BU_ATCCTTTACCCT	54	i_nb4
11-BU_CAACTTCGACGA	45	i_nb4
11-BU_GACCATACCCGC	45	i_nb4
11-BU_CCTTGCACCATC	45	i_nb4
11-BU_AGGTGCATCTAA	54	i_nb4
11-BU_TCAAATGCTGAG	45	i_nb4
11-BU_CGCGCCGACAAG	45	i_nb4
11-BU_AATTACGTTGGG	45	i_nb4
11-BU_TGAGTGCCTAAG	45	i_nb4
11-BU_CGTTATGTGAGA	54	i_nb4
11-BU_GGGCCCCGGCAC	45	i_nb4
11-BU_AACCACGTTCTT	45	i_nb4
11-BU_GTTTCATACTAT	45	i_nb4
11-BU_TTCATGAGCTTT	45	i_nb4
11-BU_TATTCTTCGCCT	54	i_nb4
11-BU_GGCAATTCATAT	45	i_nb4
11-BU_GCACTACTCTAT	54	i_nb4
11-BU_ATCCTGCCGCGT	45	i_nb4
11-BU_ACGGCCGCCCCT	54	i_nb4
11-BU_TACTCTATTATT	45	i_nb4
11-BU_ACCCCTATCTCA	45	i_nb4
11-BU_TCCAGGATTTAC	45	i_nb4
11-BU_CCTGATAAAGCT	45	i_nb4
11-BU_ATTCGTCTACCT	54	i_nb4
11-BU_CGATTGGGCGTT	45	i_nb4
11-BU_ACGAAGTACTTA	45	i_nb4
11-BU_GACGGCCAGTTA	45	i_nb4
11-BU_CAGCTTCGCCAT	45	i_nb4
11-BU_GATAATTCGAGA	45	i_nb4
11-BU_GCATGGGGCCTG	54	i_nb4
11-BU_GTGTCAGTAGTG	45	i_nb4
11-BU_CTTCATAGTCGC	45	i_nb4
11-BU_CCTACTAATGCT	45	i_nb4
11-BU_AGACCCCACACC	45	i_nb4
11-BU_GCCCAGAGCTCA	54	i_nb4
11-BU_CGGGGCTGGTGT	54	i_nb4
11-BU_TTAGGTGCCACC	54	i_nb4
11-BU_TGAACCTCCGAC	45	i_nb4
11-BU_GCCCATTGGTCT	45	i_nb4
11-BU_TAAGAACTTCCA	45	i_nb4
11-BU_TTTTCCAATGGT	45	i_nb4
11-BU_ACGTCGCAGTGC	45	i_nb4
11-BU_GTGGAAGCGGGG	45	i_nb4
11-BU_TGGCCGCGCCCC	54	i_nb4
11-BU_TGTTGGATAAGG	54	i_nb4
11-BU_TTACCGTACACA	45	i_nb4
11-BU_AGAGCCGAACGC	45	i_nb4
11-BU_CCATTACGTTTA	45	i_nb4
11-BU_TTCAGCCCATGA	45	i_nb4
11-BU_TCGAAGCTCTTC	45	i_nb4
11-BU_AGTTAATGTTAG	54	i_nb4
11-BU_TAACAGCGCTCA	45	i_nb4
11-BU_ACCTGACAACCT	45	i_nb4
11-BU_AAACCAACTTCA	45	i_nb4
11-BU_TTATCTTGATAT	45	i_nb4
11-BU_CCTGCGATCCTC	45	i_nb4
11-BU_TCATTTTACTGA	45	i_nb4
11-BU_CTGAACGTTCTG	45	i_nb4
11-BU_TATATGCGCGTA	54	i_nb4
11-BU_TTCCCGTTACAT	54	i_nb4
11-BU_TCTTTCGAAACA	45	i_nb4
11-BU_ATCAGCGCGGTC	45	i_nb4
11-BU_AAGGTTCCTCTA	45	i_nb4
11-BU_CTGTCCCCTAAC	54	i_nb4
11-BU_AATTAGGACACA	45	i_nb4
11-BU_CAACTGGTCCGT	45	i_nb4
11-BU_ATCGAGTTGGCG	45	i_nb4
11-BU_CTGACTTGTAAG	45	i_nb4
11-BU_GGCTCCGGAAAG	54	i_nb4
11-BU_TGTTAACTTAAA	45	i_nb4
11-BU_GGTCCTTATACA	45	i_nb4
11-BU_TAGTCGATCTGT	58	i_nb4
11-BU_AATGTATTGGTT	45	i_nb4
11-BU_AAGACAACCACG	54	i_nb4
11-BU_GTTCTCCCCGGC	45	i_nb4
11-BU_AAGAAACTGTCC	45	i_nb4
11-BU_CATTCCTGATTT	45	i_nb4
11-BU_TCACACTCCTTC	45	i_nb4
11-BU_CGACTTCCGCCA	54	i_nb4
11-BU_TTCCTGCTCAGT	45	i_nb4
11-BU_TGAAGTTTGTAG	45	i_nb4
11-BU_TTCGATGTCGAA	45	i_nb4
11-BU_GACAATCGAACT	45	i_nb4
11-BU_CTTCACTACCAT	45	i_nb4
11-BU_TATATTACCGTC	45	i_nb4
11-BU_TGTTGGCCATGG	45	i_nb4
11-BU_CTTCAGTCCACT	45	i_nb4
11-BU_AAGTCGCGGCCT	45	i_nb4
11-BU_GTTGTCGATCTA	54	i_nb4
11-BU_GGGTCTAGAACG	54	i_nb4
11-BU_CTTGCTAGTTCA	54	i_nb4
11-BU_GCAACCCACATA	45	i_nb4
11-BU_TCTGCTTTTGCG	54	i_nb4
11-BU_CGCCCACCTAAA	54	i_nb4
11-BU_CATCACCTAACC	45	i_nb4
11-BU_TAAAACCTAAAC	45	i_nb4
11-BU_ACCATCAACCTT	45	i_nb4
12-N1_TTGAGCCACCCT	54	i_nb4
12-N1_CAGTCTGGAACT	54	i_nb4
12-N1_CACAACCACGAG	45	i_nb4
12-N1_ATGTTCTCAACA	45	i_nb4
12-N1_AAGTAGCATTCC	45	i_nb4
12-N1_CGACATCGATAT	45	i_nem
12-N1_ACACCAGCCGAT	45	i_nb4
12-N1_GAAACCCACATG	45	i_nb4
12-N1_TTGCTTTTCTAC	45	i_nb4
12-N1_ACAGGATTCCTC	45	i_nb4
12-N1_CTTGTAACAACT	54	i_nb4
12-N1_GTCTTGACTTCC	45	i_nb4
12-N1_GAGATATACCTA	45	i_nb4
12-N2_GATGGGTCTTTC	54	i_nb4
12-N2_CTATAAAGACCC	45	i_nb4
12-N2_CCACGCGACACT	45	i_nb4
12-N2_CCAGATTCTACT	54	i_nb4
12-N2_TCATATCTAAAC	45	i_nb4
12-N2_GGCAAGACACCT	45	i_nb4
12-N2_ACCTTCGGGTAG	45	i_nb4
12-N2_ACATCTTATGTC	54	i_nb4
12-N2_GACCGACAACAC	45	i_nb4
12-N2_TAGCAGATACCT	54	i_nb4
12-N2_TTATTAAGCAAT	45	i_nb4
12-N2_CCGTAGATCCGG	54	i_nb4
12-N2_CAACCTGTCCCA	54	i_nb4
12-N2_CTACGAGCGCTT	45	i_nb4
12-N2_CCTTCGTTCTGA	45	i_nb4
12-N2_GCGAACAAACAA	54	i_nb4
12-N2_TACAACAGCACG	54	i_nb4
12-N2_GAACCTCTTTCA	54	i_nb4
12-N2_ATGGTATTTAAG	45	i_nb4
12-N2_ATTAGATCACGT	45	i_nb4
12-N2_TTGTCTAAGTTA	45	i_nb4
11-PO_GGCGTCCTGTTT	46	i_nb3
11-PO_GCAGGTTTGCCG	46	i_nb3
06-KI_CGTGAATGGTCA	60	i_nem
11-PO_TCATTTATGTAA	45	i_nem
01-D1_CGGTGCTAGGTC	40	i_nb4
01-D1_ACGCTCCCCAGA	54	i_nb4
01-D1_TTGGAATGTCAC	40	i_nb4
01-D1_TTAACTTTCGGC	40	i_nb4
01-P2_TTCTGGCCACCA	40	i_nb4
01-P2_GGACCTCGAAGC	40	i_nb4
01-P2_ATCCATGTCTTA	40	i_nb4
01-P2_CTCCGTGTAAGC	40	i_nb4
02-CO_CAAGGCGGGCGN	42	i_nb4
02-CO_GCGCACTTGTTA	25	i_nb4
02-CO_ATGAGAATTTTG	40	i_nb4
02-CO_TGTCTTGATGTG	40	i_nb4
02-CO_CCAACAGTCATT	40	i_nb4
02-CO_AACGCCCCTTTT	54	i_nb4
02-CO_ATTTGGTGGAGC	54	i_nb4
02-CO_TTACGCTCTCTC	54	i_nb4
02-CO_GTGAAGATCGGG	40	i_nb4
02-CO_CTATTAGAGTGN	54	i_nb4
02-CO_CGACATGAACCG	40	i_nb4
02-CO_GATATTCCATCN	40	i_nb4
02-CO_AGGCTAGATGGC	40	i_nb4
02-CO_ACGACATTCCTT	54	i_nb4
02-CO_TTCATGAATTCT	40	i_nb4
02-CO_TTAAACATCGCC	54	i_nb4
02-CO_TGAATACGCCCT	40	i_nb4
02-CO_CTTTACGCCATC	40	i_nb4
02-CO_CACCGAAGTAAG	40	i_nb4
02-CO_CTGATACCGGGT	40	i_nb4
02-CO_GCGTCGACTGAT	40	i_nb4
02-CO_CGCAGGTAGGTT	40	i_nb4
02-CO_ATCCCATCATGA	40	i_nb4
02-CO_GGCAAGTTGCAG	40	i_nb4
02-CO_TTTGCCAGATGG	40	i_nb4
02-CO_GGAAAGGATGTC	40	i_nb4
02-CO_ATGGTGGCACGT	40	i_nb4
02-CO_TGGGCCCCGCCA	40	i_nb4
02-P1_CTCAGCCTCCGC	54	i_nb4
02-P1_CGTGTTGGCGAC	54	i_nb4
02-P1_TCCGCGAGGCGA	54	i_nb4
02-P1_TCGCCCTCTCCC	40	i_nb4
02-P1_CGAACAGCCTTT	40	i_nb4
02-P1_TTCATTTAGGTC	40	i_nb4
02-P1_ACTTAAGTCCTG	40	i_nb4
02-P1_CAGCAGACACGT	40	i_nb4
02-P1_TGAACGCGCTAG	40	i_nb4
02-P1_CCGCAAGCCTGC	40	i_nb4
02-P1_GCTCTCGGCTCA	40	i_nb4
02-P1_GCAGTATTCGTG	54	i_nb4
02-P1_TTTCACCCAGGC	40	i_nb4
02-P1_CGGACCATCCAA	40	i_nb4
02-P1_CCACTGGGGCAT	40	i_nb4
02-P1_CATCCGAAGACT	40	i_nb4
02-P1_TTCGCGACTAGG	40	i_nb4
02-P1_ACTGTCCAATCG	40	i_nb4
02-P1_GAGGGTTTCATG	40	i_nb4
02-PB_TCATTCGTCTGN	40	i_nb4
02-PB_AGAATCGAATAA	40	i_nb4
02-PB_GACCCACATTTA	40	i_nb4
02-PB_TTCCGTTACTTG	40	i_nb4
02-PB_TAGTCGTAGGGA	54	i_nb4
02-PB_AATCCGCGTGTG	54	i_nb4
02-PB_AGATCGGGCCTT	40	i_nb4
02-PB_TCAGCTTGGACA	40	i_nb4
02-PB_TATCGTTGTGAC	40	i_nb4
02-PB_TGCTCCAGCTGC	40	i_nb4
02-PB_ATTAAGTCTTCG	40	i_nb4
02-PB_TGCTCACAACTG	40	i_nb4
02-PB_CGCACCCACGAT	40	i_nb4
02-PB_CTGAGGATCATG	40	i_nb4
03-KI_TACTTGAATAAG	54	i_nb4
03-KI_GACCACAATCCA	54	i_nb4
03-KI_ATGGCCTCACCT	40	i_nb4
03-KI_CGTGCCCAGCCT	40	i_nb4
03-KI_CTATACGTTGCC	40	i_nb4
03-KI_GGATGGCACTTC	54	i_nb4
03-KI_GCAGTTCGCATG	40	i_nb4
03-KI_GAATCAAGCTAA	40	i_nb4
03-KI_TTGTATCTTCGC	40	i_nb4
03-MA_TTCTCCTGGGAT	40	i_nb4
03-MA_CTTTATGTGGTA	54	i_nb4
03-MA_TATTGCGTTTTC	40	i_nb4
03-MA_TCAGTCCTCATA	40	i_nb4
03-MA_AAGTGAGATTGT	40	i_nb4
03-MA_GCGATCGCTAAA	40	i_nb4
03-FM_TCTCCCGAGACA	40	i_nb4
03-FM_CACATCACCAAA	40	i_nb4
03-FM_GAAGTCAGAACT	54	i_nb4
03-FM_GAGTTGTCACAT	40	i_nb4
03-FM_CATCTACAACTG	40	i_nb4
03-FM_CGTGCTAAGAGC	40	i_nb4
03-FM_ACCTCAGCCATG	40	i_nb4
03-FM_CTGGCCCTCTTT	54	i_nb4
03-FM_CATATGTACATC	54	i_nb4
03-FM_GACCAAGATTGT	54	i_nb4
03-FM_GGATTTCTCGAG	40	i_nb4
03-FM_TAGCAACGGGTC	40	i_nb4
03-FM_AATGGCTGTCAG	54	i_nb4
03-FM_TAAGCGTCAAGA	40	i_nb4
03-FM_GAGTTTACGACC	40	i_nb4
03-FM_TATTAATCACGC	40	i_nb4
03-FM_AAGAGTACCGGG	40	i_nb4
03-FM_TGGTGATGTTCC	40	i_nb4
06-FM_GTCCTCATAGCT	40	i_nb4
06-FM_GTTGGGCATTAT	54	i_nb4
06-FM_CCATCGGCATTT	40	i_nb4
06-KI_AGTGACTTCCGA	40	i_nb4
06-KI_ATCCGCCCACGA	40	i_nb4
06-KI_CATCACGGCAAG	40	i_nb4
06-KI_AGACAAAACATC	40	i_nb4
06-KI_CAGGTCACTCCT	54	i_nb4
06-KI_AGATTGCTATTT	40	i_nb4
06-KI_GTACACTAAACC	54	i_nb4
06-KI_TGTCTCCTTCGG	54	i_nb4
06-KI_CTGCCATATAAC	40	i_nb4
06-KI_CCCCTCCCGCAG	40	i_nb4
06-KI_TACTGCTCTGAC	40	i_nb4
06-KI_TAGCCCTTTACT	54	i_nb4
06-KI_CTTGTTTCCCTG	40	i_nb4
06-KI_TGATGTAGGTAT	40	i_nb4
06-KI_TACTCGGCTTGC	40	i_nb4
06-KI_CAAGGCAGATGT	40	i_nb4
06-KI_AAATCAGCAACT	40	i_nb4
06-KI_TCATAGAGGAAT	54	i_nb4
06-KI_GGTGAATCGCGA	40	i_nb4
06-KI_TCGGGGTCATCT	40	i_nb4
06-KI_GCCCGACGCTCT	40	i_nb4
06-KI_GACGTACATCAG	40	i_nb4
11-PO_GTCCCAATCCGC	40	i_nb4
11-PO_AACCATGTCCTG	40	i_nb4
11-PO_CGATTTCTTTTC	40	i_nb4
11-PO_TCTCCGTATCCT	40	i_nb4
11-PO_TTGCCGCACGCT	40	i_nb4
11-PO_ATCCATTCTCTA	40	i_nb4
11-PO_GCAGATTGGTCA	40	i_nb4
11-PO_TCAACTATGTCA	40	i_nb4
11-PO_TCTGTTTCGACC	54	i_nb4
11-PO_TGTCCGGCGGAG	40	i_nb4
11-PO_CCCCCACTTTAA	40	i_nb4
11-PO_CCCCTTCAAGCC	40	i_nb4
11-PO_AACTCCGGTTCT	40	i_nb4
11-PO_GCTCACACCACC	40	i_nb4
11-PO_CGGTCTACTGAA	54	i_nb4
11-PO_TCGTAGCCTTGA	40	i_nb4
11-PO_CCGACCAGCCCC	40	i_nb4
11-PO_CCTAGCCGCTAT	40	i_nb4
11-PO_ATGACTCTAATT	54	i_nb4
11-PO_CTCCCTCATGAA	40	i_nb4
11-PO_TTAACGAGTCGG	40	i_nb4
11-PO_CCGTCAATCGGT	40	i_nb4
11-PO_ATTGATCCTGTT	40	i_nb4
11-PO_GCACAAATATTG	40	i_nb4
11-PO_CCGGCCCAACCA	40	i_nb4
11-PO_TAGGTCCTGCGC	40	i_nb4
11-PO_CTTAAACGCGGC	40	i_nb4
11-PO_GTCTGCTATCTA	40	i_nb4
11-PO_GGTTTTCCAGCG	40	i_nb4
11-PO_CAGGCATTTCGA	40	i_nb4
11-PO_TTGCTCCTATCA	54	i_nb4
11-PO_AAGAGGCGCAAA	40	i_nb4
11-PO_GCAGGTAACGAG	40	i_nb4
11-PO_TGATAATTTAAT	40	i_nb4
11-PO_CTAGCATAATAA	40	i_nb4
11-PO_GGATACCTCGCC	40	i_nb4
11-PO_AACATGGTTGCA	54	i_nb4
11-PO_ATCCATGTGCGG	40	i_nb4
11-BU_TCCCGTTCAAAT	40	i_nb4
11-BU_TCCGAACCTCTC	40	i_nb4
11-BU_GTTACGACTACG	40	i_nb4
11-BU_TGGTTGATTGAC	45	i_nb4
11-BU_GCGTATTTAATA	40	i_nb4
11-BU_CCCAACGTGATC	40	i_nb4
11-BU_CAGTTTTTGAAC	54	i_nb4
11-BU_CGCCTGTCCCCC	40	i_nb4
11-BU_TTTTTACCGCTC	40	i_nb4
11-BU_CTGCTGAGCCCC	40	i_nb4
11-BU_CTCATCTCCTTA	40	i_nb4
11-BU_CCGTAAAACTCC	45	i_nb4
11-BU_CACCACCAACCT	40	i_nb4
11-BU_CACATCACTAGC	54	i_nb4
11-BU_TTGCCGCCTTGC	40	i_nb4
11-BU_GTACCCTCAGGT	40	i_nb4
11-BU_TCGAAACTTGTT	40	i_nb4
11-BU_ATCCCAATTCAC	40	i_nb4
11-BU_TTTTGAAGGTTC	54	i_nb4
11-BU_CTACCCTCTACC	40	i_nb4
11-BU_CACCAGTCCTCG	54	i_nb4
11-BU_TTATAGGCTTCA	40	i_nb4
11-BU_GTGTTGGCGGTC	40	i_nb4
11-BU_GCGCGCGTTCAG	54	i_nb4
11-BU_CATTTTATGATA	40	i_nb4
11-BU_CCCTCGGCGCAT	40	i_nb4
11-BU_GCGTACCGACCA	40	i_nb4
11-BU_TGAATCCTCTCA	40	i_nb4
11-BU_TGAACGCGTCAT	54	i_nb4
11-BU_ACCACCTTGGGC	40	i_nb4
11-BU_CGATGTGGACTA	40	i_nb4
11-BU_ACCAACCCTAAC	40	i_nb4
11-BU_TGCGCGGTGAAC	40	i_nb4
11-BU_GCGCGTGCTCTC	40	i_nb4
11-BU_GGAAGACTATCG	40	i_nb4
11-BU_CCAGCTTACAAG	40	i_nb4
11-BU_ATCAAGGACCAT	40	i_nb4
11-BU_GACCAGCGAGCT	54	i_nb4
11-BU_ATATGGTAGGGC	40	i_nb4
11-BU_ATAAGGCCGTCG	54	i_nb4
11-BU_TTGGATCTGCGG	54	i_nb4
11-BU_CACTTTCAGGGG	40	i_nb4
11-BU_GTACCCCGTTTA	40	i_nb4
11-BU_TGCCTAGCGGCG	40	i_nb4
11-BU_GCTGTAAGACAC	40	i_nb4
11-BU_TAGTACGGTCTG	40	i_nb4
11-BU_CACCAACCTGCC	54	i_nb4
11-BU_CATTTTGGGGAG	40	i_nb4
11-BU_GTAGACCGTAGA	40	i_nb4
11-BU_GCTATGAGGTAA	40	i_nb4
11-BU_ACGCAGTCGCGG	40	i_nb4
11-BU_CATACAGCTATT	40	i_nb4
12-N1_CCCTTGCAAGAA	40	i_nb4
12-N1_GAGTCGCTGTTA	40	i_nb4
12-N1_TTGATAGTAGAC	40	i_nb4
12-N1_CCCCCACACACA	40	i_nb4
12-N1_ATTAGTGTCTAA	40	i_nb4
12-N2_TCCTACGCGTTC	40	i_nb4
12-N2_ACGTCGCGCGCG	40	i_nb4
12-N2_ATCGGAAGCTAT	40	i_nb4
12-N2_ACCGTCGCGCTG	40	i_nb4
12-N2_TCTAAATGTACG	45	i_nb4
12-N2_TCCCAACAAACA	40	i_nb4
12-N2_GCTTGGTGATAA	40	i_nb4
12-N2_TGGCGTAACATT	54	i_nb4
06-FM_GGTCAATTGCGT	58	i_nb4
11-PO_AGAAACGACAAA	45	i_nb4
02-PB_ATCCAGCACGTT	53	enEp_nem2(pd)
01-D1_TTGACGGAAATC	58	enEp_nem2(pd)
01-D1_ACGGACGCAAGT	58	enEp_nem2(pd)
01-D1_CAATACTCGTAA	58	enEp_nem2(pd)
01-D1_AAACGGAACAGT	58	enEp_nem2(pd)
01-D1_ACGTACACACGA	28	enEp_SC1
01-P2_CCGCAGTCTGAC	58	enEp_nem2(pd)
01-P2_CGCATAGCGCGA	0	enEp_head
01-P2_TGGGCTGCCGAT	0	enEp_nem2(pd)
01-P2_AAGCTTAAACTC	58	enEp_nem2(pd)
01-P2_ACAGGCCGGTCT	58	enEp_nem2(pd)
01-P2_CTTGTGACAGTG	58	enEp_nem2(pd)
01-P2_CCATATGTTACT	1	enEp_foot
01-P2_GACGTAACGTGC	58	enEp_nem2(pd)
01-P2_CTAAGTAGACCN	58	enEp_nem2(pd)
01-P2_TTCGGATGTATG	58	enEp_nem2(pd)
01-P2_AATAGCCGGTGA	58	enEp_SC1
01-P2_GGTACGGGCATT	0	enEp_nem2(pd)
01-P2_ATTACTTGCAAG	58	enEp_nem2(pd)
01-P2_CGCATAGCCGAN	1	enEp_nem2(pd)
01-P2_AAAAAGCTAGAG	58	enEp_nem2(pd)
02-CO_CCCAGTTACTTC	58	enEp_nem2(pd)
02-CO_CGCAAGTTTCAC	58	enEp_nem2(pd)
02-CO_TTTAGGAGACAN	58	enEp_nem2(pd)
02-CO_CGGATACGTTCN	58	enEp_nem2(pd)
02-CO_ATCTTGCGCCTN	58	enEp_nem2(pd)
02-CO_CATGTGTCAGTT	0	enEp_head
02-CO_GGGGACGGTTGG	58	enEp_nem2(pd)
02-CO_AGGGAAGAATAN	11	i_nb4
02-CO_ATACTGTTCGAA	0	enEp_nem2(pd)
02-CO_TACCCTCGCGGN	58	enEp_nem2(pd)
02-CO_AACCGTTGATCN	58	enEp_nem2(pd)
02-CO_GCGGGCGGCGCG	58	enEp_nem2(pd)
02-CO_TTAACTATGCGG	58	enEp_nem2(pd)
02-CO_GCATCAAAGTGN	14	enEp_SC1
02-CO_GCAGTCAAAGTG	14	enEp_SC1
02-CO_GCACGGATCGTA	14	enEp_foot
02-CO_GAGGGAAGAATA	58	ecEp_nem1(pd)
02-CO_ACGCGCGTTAGC	58	enEp_nem2(pd)
02-P1_ACCAAGCAATCG	0	enEp_nem2(pd)
02-P1_CTGGTTAATAAG	58	enEp_nem2(pd)
02-P1_TCGCGAAAAGCC	0	enEp_nem2(pd)
02-P1_AGGAGGCTAACN	0	enEp_nem2(pd)
02-P1_TAAACATCACTN	58	enEp_nem2(pd)
02-P1_GCGCCTGGGGAT	58	enEp_nem2(pd)
02-P1_ATCCGGAGTGGC	58	enEp_nem2(pd)
02-P1_CAGCACGGCTTC	58	enEp_nem2(pd)
02-P1_CCTTTTTTACAN	58	enEp_nem2(pd)
02-P1_TTTTCTAATGGN	58	enEp_nem2(pd)
02-P1_TAAACATCACTT	58	enEp_nem2(pd)
02-P1_CTAACCAAAGGA	58	enEp_nem2(pd)
02-P1_TGCTTATCATAC	58	enEp_nem2(pd)
02-P1_CGTCCGAGTTCA	58	enEp_nem2(pd)
02-P1_CTGACGTCGGCN	4	enEp_nem2(pd)
02-P1_GTGAACTTGGCG	58	enEp_nem2(pd)
02-P1_GTGATTGCCCCA	58	enEp_nem2(pd)
02-P1_CCGGTCTATTAG	5	enEp_SC1
02-P1_GCTGGGGCGGAG	58	enEp_nem2(pd)
02-P1_TGCGTGAACGTT	58	enEp_nem2(pd)
02-P1_TTCGACGATTTN	58	enEp_nem2(pd)
02-P1_TCGCGGTACGGA	58	enEp_nem2(pd)
02-P1_TGGCTGCTCTCC	58	enEp_nem2(pd)
02-P1_TGCGTGAACGTN	58	enEp_nem2(pd)
02-P1_GCATGGGCCGGA	58	enEp_nem2(pd)
02-PB_CCCAAGATCAGA	0	enEp_nem2(pd)
02-PB_AAACTGCGCTGG	58	enEp_nem2(pd)
02-PB_TAAGCTTACTCN	0	enEp_nem2(pd)
02-PB_AAAAGTAATATN	58	enEp_nem2(pd)
02-PB_GACAAATGGAAN	5	enEp_nem2(pd)
02-PB_GCTGTAATACAG	58	enEp_nem2(pd)
02-PB_CCTAAGTGAGTG	14	enEp_SC2
02-PB_GGGACCGGAGTA	58	enEp_nem2(pd)
02-PB_GGGGTTAGTGCC	58	enEp_nem2(pd)
03-KI_GCTTTGAGATAC	58	enEp_nem2(pd)
03-KI_ACTGATACGCAG	58	enEp_nem2(pd)
03-KI_TTAATGTATGGA	58	enEp_nem2(pd)
03-KI_AGCTGAGCCAGG	58	enEp_nem2(pd)
03-KI_CATACTCTTTTN	58	enEp_nem2(pd)
03-KI_TTATGTATGGAN	58	enEp_nem2(pd)
03-KI_TACACTGCAGCC	58	enEp_nem2(pd)
03-KI_TACCTGCAGCCN	58	enEp_nem2(pd)
03-MA_CAGTATATGCGA	0	enEp_SC1
03-MA_ATGGGACTCCGA	0	enEp_head
03-MA_ATTTGTGGTGAC	58	enEp_nem2(pd)
03-MA_ATTTACCATAGA	0	enEp_nem2(pd)
03-FM_ACACACCATCAT	58	i_nb4
03-FM_ATTGTGTGATGN	58	enEp_nem2(pd)
03-FM_AAAGCAGAAATT	0	enEp_foot
03-FM_ATTAGTGTGATG	58	enEp_nem2(pd)
03-FM_GTCCAGGTCTGN	58	enEp_nem2(pd)
03-FM_GCCCTGTATAGN	58	enEp_nem2(pd)
03-FM_GTCACAGGTCTG	58	enEp_nem2(pd)
03-FM_GCCACTGTATAG	58	enEp_nem2(pd)
06-FM_GTTCTATTTTCC	0	enEp_nem2(pd)
06-FM_CTTGACAATCCT	58	enEp_nem2(pd)
06-FM_CTCTTCCAATGT	32	enEp_nem2(pd)
06-FM_TTCATTTTCGTC	32	enEp_SC1
06-FM_TTTGGAGTCGCG	0	enEp_nem2(pd)
06-FM_CACGTCATCAAN	58	enEp_nem2(pd)
06-FM_CCAACCATAGTN	58	enEp_nem2(pd)
06-FM_GGCCAGTTAACG	58	enEp_nem2(pd)
06-FM_TTCTTGCTTACC	58	enEp_nem2(pd)
06-KI_CATTCCCTCATC	32	enEp_nem2(pd)
06-KI_GCAGCCTATACC	58	enEp_nem2(pd)
06-KI_TGACTCGATTTT	58	enEp_nem2(pd)
06-KI_GGGCAGAGCCTG	58	enEp_nem2(pd)
06-KI_TCCGGAATCGAA	32	enEp_nem2(pd)
06-KI_AATTAAGGGGCG	58	enEp_nem2(pd)
06-KI_GTACAAGGCTAA	58	enEp_nem2(pd)
06-KI_GCGTCGCTCGCA	58	enEp_nem2(pd)
06-KI_TTACAGGGCCAC	58	enEp_nem2(pd)
06-KI_AAACGTTCGGGC	58	enEp_nem2(pd)
06-KI_ACAAACCTCGCG	58	enEp_nem2(pd)
06-KI_GCCGACGACACG	58	enEp_nem2(pd)
06-KI_ACAACCTCGCGN	58	enEp_nem2(pd)
06-KI_AAGAGACCTCAG	58	enEp_nem2(pd)
06-KI_TCTCAAGGCAAC	58	enEp_nem2(pd)
06-KI_AAGGACCTCAGN	58	enEp_nem2(pd)
06-KI_GCGAGTACGGTC	14	enEp_nem2(pd)
06-KI_CAGGAAGGGACA	58	enEp_nem2(pd)
06-KI_GCGGTACGGTCN	14	enEp_nem2(pd)
06-KI_GAGGCCCCTATA	58	enEp_nem2(pd)
11-PO_ATTCATCCATAA	58	enEp_nem2(pd)
11-PO_TACTATTAATGC	58	enEp_nem2(pd)
11-PO_AGGCGCTACTCA	58	enEp_nem2(pd)
11-PO_GAATCAGGAAGG	58	enEp_nem2(pd)
11-PO_ACAGCTGCATCG	58	enEp_nem2(pd)
11-PO_CTGTCTATCGGT	58	enEp_nem2(pd)
11-PO_AACTGCACCAGT	58	enEp_nem2(pd)
11-PO_GTTATGGCCCTA	58	enEp_nem2(pd)
11-PO_TAAGCTTCGCCT	58	enEp_SC3
11-PO_GGTGGCAGCGCA	45	ecEp_nem1(pd)
11-PO_AAGATCTACGAC	45	ecEp_nem1(pd)
11-PO_GCCGAGGATGGC	45	ecEp_nem1(pd)
11-BU_CGTCGCCAATTA	58	enEp_nem2(pd)
11-BU_GACTGTAAAGCC	58	enEp_nem2(pd)
11-BU_ATAGCACAACTG	4	enEp_nem2(pd)
11-BU_TAGCACTACATT	58	enEp_nem2(pd)
11-BU_AATTCATCGGAA	58	enEp_nem2(pd)
11-BU_AGTTCTTACGCT	58	enEp_nem2(pd)
11-BU_ATTTTAATTGGA	58	enEp_nem2(pd)
11-BU_TTTAACGCGATG	58	enEp_nem2(pd)
11-BU_TCTGTTGTCCCT	4	enEp_SC2
11-BU_AGTCCTACGCAC	58	enEp_nem2(pd)
11-BU_GTTAAGCCTAGG	58	enEp_nem2(pd)
11-BU_TCAACAATGGGG	17	enEp_nem2(pd)
11-BU_GGCACATCATTC	58	enEp_nem2(pd)
11-BU_CTTTGGGCGACG	58	enEp_nem2(pd)
11-BU_CGGGTTAATAAT	58	enEp_nem2(pd)
11-BU_AGAGGTTTAGGA	58	enEp_nem2(pd)
11-BU_TCCGATCATACA	58	enEp_nem2(pd)
11-BU_TGGCTCGAAAAC	14	enEp_head
11-BU_AGGAAGCGACTG	58	enEp_nem2(pd)
11-BU_TGACCATCCGAA	45	i_nb4
12-N2_ACCTATATGAGG	58	enEp_nem2(pd)
06-KI_CAGTTCATCCAA	45	ecEp_nem1(pd)
11-PO_CAAGGGCCACAA	45	ecEp_nem1(pd)
11-BU_TCTCATCACCCA	42	i_nb4
11-BU_GATATGCAGATA	42	ecEp_nem1(pd)
01-P2_GTATCGTCGGCN	37	ecEp_SC2
01-P2_GGAGCACACCTN	37	ecEp_SC2
01-P2_CAGCGGTTATAN	37	ecEp_SC2
01-P2_TACTTGCACGGT	10	ecEp_SC2
02-CO_CCGAACCCAGAG	37	ecEp_SC2
02-CO_GCGGGCCACTGC	19	ecEp_SC2
02-P1_GTATAAACGCGN	37	ecEp_SC2
02-P1_CCGGACTCGATT	39	ecEp_SC2
03-KI_AAGTCTGACCTA	10	ecEp_SC2
06-KI_CACGCTACCAAT	43	ecEp_SC2
11-PO_TAGAAGGAACGT	39	ecEp_SC2
11-BU_ACACTCACACCT	37	ecEp_SC2
01-P2_CCAAAAAGCTTN	45	ecEp_nem1(pd)
02-CO_GACCAATCCACC	54	i_nb4
06-KI_CCACCCGGGCTC	45	ecEp_nem1(pd)
01-D1_CCCAACGCAAAC	27	ecEp_nem1(pd)
01-D1_CAGTGACAGACT	42	ecEp_nem1(pd)
01-D1_TTCAGTGCCGGA	37	ecEp_nem1(pd)
01-D1_CTAGTGACTACT	42	i_nb4
01-D1_CACGCATTACGT	27	ecEp_nem1(pd)
01-D1_CGTATTTTCCTN	27	ecEp_nem1(pd)
01-D1_GGCGAAACAATT	42	ecEp_nem1(pd)
01-D1_CACCCATTCATT	27	ecEp_nem1(pd)
01-D1_CGATTCGAACCC	27	ecEp_nem1(pd)
01-D1_TGGGTGACTACN	27	ecEp_nem1(pd)
01-D1_TGGATTACGCAG	27	ecEp_nem1(pd)
01-D1_ATGGATAGTCAA	42	ecEp_nem1(pd)
01-D1_TCTGTTAGCCCA	42	ecEp_nem1(pd)
01-D1_TCCTGGTGTTGG	42	ecEp_nem1(pd)
01-D1_ACAAATTAAATA	27	ecEp_nem1(pd)
01-D1_CACGACTTTACG	19	ecEp_nem1(pd)
01-D1_CAACCTGATACG	27	ecEp_nem1(pd)
01-D1_CCGCTATGCGCA	42	ecEp_nem1(pd)
01-D1_AAGTACCCGACT	27	ecEp_nem1(pd)
01-D1_CTGTTCTAACTG	27	ecEp_nem1(pd)
01-D1_CGCGATGAGAGG	27	ecEp_nem1(pd)
01-D1_TTTTATGAAGTN	42	ecEp_nem1(pd)
01-D1_GGACAAACTCCC	42	ecEp_nem1(pd)
01-D1_CCATAGGAAAAN	42	i_nb4
01-D1_TTACGCCTTAGT	42	ecEp_nem1(pd)
01-D1_ACGCTTCAGACN	42	ecEp_nem1(pd)
01-D1_TTTCCAAACTCC	37	ecEp_nem1(pd)
01-D1_TGCCTAGGGATT	27	ecEp_nem1(pd)
01-D1_CGACCAAAGGCT	42	ecEp_nem1(pd)
01-D1_CGCAGAATACGN	27	ecEp_nem1(pd)
01-D1_GTTAGAGCCCTC	42	ecEp_nem1(pd)
01-D1_ATCTATCGACAT	27	ecEp_nem1(pd)
01-D1_TCCGTACTCAAA	9	ecEp_nem1(pd)
01-D1_TCGGTTTGAGTC	27	ecEp_nem1(pd)
01-D1_GGCAAAAGCTAA	9	ecEp_nem1(pd)
01-D1_GCGCATCAATTG	42	ecEp_nem1(pd)
01-D1_AACAGAGGCCAA	27	ecEp_nem1(pd)
01-D1_CTGGGTATCCGT	27	ecEp_nem1(pd)
01-D1_GGAATGTGGAGT	27	ecEp_nem1(pd)
01-D1_TTCGGCGTCAGG	27	ecEp_nem1(pd)
01-D1_GGCGTGCTAGAA	42	ecEp_nem1(pd)
01-D1_TTTTTATGAAGT	42	ecEp_nem1(pd)
01-D1_TGCTGATTACGC	42	ecEp_nem1(pd)
01-D1_TGTCGGAGGCAA	42	ecEp_nem1(pd)
01-P2_CGTACTATATAT	27	ecEp_nem1(pd)
01-P2_CTCCCTGCAGCG	27	ecEp_nem1(pd)
01-P2_TGCGACGTGTAA	27	ecEp_nem1(pd)
01-P2_GTACATTCAACC	42	ecEp_nem1(pd)
01-P2_ACAGGCAGTGAG	42	ecEp_nem1(pd)
01-P2_GTAAGCCATCTG	42	ecEp_nem1(pd)
01-P2_CTGCGTACCGCT	65	ecEp_nem1(pd)
01-P2_ATGGAGGATTGN	42	ecEp_nem1(pd)
01-P2_CTGATCTGTCAG	37	ecEp_nem1(pd)
01-P2_TAGATATTTTTN	27	ecEp_nem1(pd)
01-P2_TTTATTACCAGA	42	ecEp_nem1(pd)
01-P2_TCCGCCTGCTGT	42	i_nb4
01-P2_AAAGACTTAAAN	27	ecEp_nem1(pd)
01-P2_AGGCATATTGAG	27	ecEp_nem1(pd)
01-P2_CAGACAGTGTTC	42	i_nb4
01-P2_CGTCGCATGGGA	27	ecEp_nem1(pd)
01-P2_TGTTTAGCCTTC	42	ecEp_nem1(pd)
01-P2_TTGATTAGTAAG	42	ecEp_nem1(pd)
01-P2_GTGGAGTGGCAG	27	ecEp_nem1(pd)
01-P2_GGCGACATTCAG	27	ecEp_nem1(pd)
01-P2_CAGACTCCTTGG	27	ecEp_nem1(pd)
01-P2_AGTTACTTCCCG	27	ecEp_nem1(pd)
01-P2_GAATGCTGGAGT	37	ecEp_SC2
01-P2_ACGCGCTGATTA	27	ecEp_nem1(pd)
01-P2_AGGAATAGTACN	42	ecEp_nem1(pd)
01-P2_TTTCGTACGGTG	27	ecEp_nem1(pd)
01-P2_ACCGAGTAAGCC	9	ecEp_SC2
01-P2_TCGGCACCCGCA	42	ecEp_nem1(pd)
01-P2_GTCGGGATGCTN	27	ecEp_nem1(pd)
01-P2_GAACCTTCGAGG	42	ecEp_nem1(pd)
01-P2_AGTGTTCTGCTC	27	ecEp_nem1(pd)
01-P2_GGAGCTGACTTA	42	ecEp_nem1(pd)
01-P2_GACTAAGATCAG	27	ecEp_nem1(pd)
01-P2_TCCTAGCCCACN	27	ecEp_nem1(pd)
01-P2_TGCTGGACACAN	27	ecEp_nem1(pd)
01-P2_GCTAGAGTCAAG	42	i_nb4
01-P2_ACGAGCCTATCN	42	ecEp_nem1(pd)
01-P2_CGTGCCGCGGGN	27	ecEp_nem1(pd)
01-P2_GAAGTATCCCAA	42	ecEp_nem1(pd)
01-P2_GCCTCCTATGTG	27	ecEp_nem1(pd)
01-P2_TCTACCTTTATG	42	ecEp_nem1(pd)
01-P2_GTTTTGTCAAAN	42	ecEp_nem1(pd)
01-P2_ATGCAATGTCCN	42	ecEp_nem1(pd)
01-P2_TGGGATCCGATC	42	ecEp_nem1(pd)
01-P2_GAGGACCGCATN	27	ecEp_nem1(pd)
01-P2_GGAGATCCGTTN	10	ecEp_nem1(pd)
01-P2_ACGGTATCGATC	27	ecEp_nem1(pd)
01-P2_TTTGGTCGCTCG	27	ecEp_nem1(pd)
01-P2_CCGAATACTCGG	42	ecEp_nem1(pd)
01-P2_GCGGGATTTCTN	42	ecEp_nem1(pd)
01-P2_GCGCTCTCGGCC	42	ecEp_nem1(pd)
01-P2_ACAAGTAGGCCC	27	ecEp_nem1(pd)
01-P2_CGTGCCGCCGGG	27	ecEp_nem1(pd)
01-P2_TCAATGAGGCCG	8	ecEp_SC2
01-P2_AACGTGGGAACC	27	ecEp_nem1(pd)
01-P2_CGGATCCGCTCA	42	ecEp_nem1(pd)
01-P2_GTATCCGTTGGN	42	ecEp_nem1(pd)
01-P2_TCCTAGCCGCAC	65	ecEp_nem1(pd)
02-CO_TACGTGTCGCCT	27	ecEp_nem1(pd)
02-CO_ATACCTCTGGTN	42	ecEp_nem1(pd)
02-CO_CACCGCCTCGAC	42	ecEp_nem1(pd)
02-CO_AAGTTATAGTTA	27	ecEp_nem1(pd)
02-CO_TTCAAGGTATGN	42	ecEp_nem1(pd)
02-CO_CATTAGATACTA	27	ecEp_nem1(pd)
02-CO_TGTCCGTCGGGN	27	ecEp_nem1(pd)
02-CO_GTGAATACACGT	27	ecEp_nem1(pd)
02-CO_CAAAAATGTTGT	9	ecEp_nem1(pd)
02-CO_CGTGCGAGTTGN	27	ecEp_nem1(pd)
02-CO_ACCGAGAATGTA	9	ecEp_nem1(pd)
02-CO_AAGCGCCCTTGG	27	ecEp_nem1(pd)
02-CO_TTGCGCCCCCAN	27	ecEp_nem1(pd)
02-CO_ACGTACCTGACG	27	ecEp_nem1(pd)
02-CO_AAGCTCTCTTGG	42	ecEp_nem1(pd)
02-CO_GTAAGCCAGCAA	37	ecEp_nem1(pd)
02-CO_CGGTCCGCTGGG	42	ecEp_nem1(pd)
02-CO_AGTCCTCCAAGA	42	ecEp_nem1(pd)
02-CO_AGATTACTCCAT	42	ecEp_nem1(pd)
02-CO_GCTGCGGCCGAG	42	i_nb4
02-CO_TCAGGAAGGGTG	42	ecEp_nem1(pd)
02-CO_CAGCAACACGCN	42	ecEp_nem1(pd)
02-CO_TCCGGTCCCACN	65	ecEp_nem1(pd)
02-CO_AGGTTCAAATAC	27	ecEp_nem1(pd)
02-CO_GTTATATTGCGN	27	ecEp_nem1(pd)
02-CO_CCTTGGAGCGGA	27	ecEp_nem1(pd)
02-CO_TTGGTAGGGCAC	27	ecEp_nem1(pd)
02-CO_GCACCGAGTTGC	27	ecEp_nem1(pd)
02-CO_ACTTCCTTGCTC	27	ecEp_nem1(pd)
02-CO_ATGTGAGGGCAN	27	ecEp_nem1(pd)
02-CO_CTTCTAGTAGTC	27	ecEp_nem1(pd)
02-CO_CCGTGAAAGCGA	9	ecEp_nem1(pd)
02-CO_CCAGTTTCTGAT	42	ecEp_nem1(pd)
02-CO_AAGCGCTCAGGN	27	ecEp_nem1(pd)
02-CO_ATTTGTTATTCG	27	ecEp_nem1(pd)
02-CO_AATCAAATGCTN	42	ecEp_nem1(pd)
02-CO_TGGGAGGCCGCC	65	ecEp_nem1(pd)
02-CO_ACCTTCTTGGTA	42	ecEp_nem1(pd)
02-CO_CGTCCTAAGAGN	9	ecEp_nem1(pd)
02-CO_AGAAAATTCGCA	42	ecEp_nem1(pd)
02-CO_GTTCCGCATTGC	42	ecEp_nem1(pd)
02-CO_GGTCGGGGATTT	27	ecEp_nem1(pd)
02-CO_TGCTGTTTGAGC	42	ecEp_nem1(pd)
02-CO_AATCCAGAATGG	27	ecEp_nem1(pd)
02-CO_CACTCTACGTGA	27	ecEp_nem1(pd)
02-CO_AATCTTTTGTTN	27	ecEp_nem1(pd)
02-CO_CAGATACAAGAA	9	ecEp_nem1(pd)
02-CO_TTGCGCGGTTAT	27	ecEp_nem1(pd)
02-CO_CGCCAATGCAAN	19	ecEp_nem1(pd)
02-CO_GCTAGCTAATAC	27	ecEp_nem1(pd)
02-CO_CTTTTCGACAAT	27	ecEp_nem1(pd)
02-CO_CCTGAAGCTTGN	37	ecEp_nem1(pd)
02-CO_CATTAGATACAN	27	ecEp_nem1(pd)
02-CO_GAAGGGGCCGCN	42	ecEp_nem1(pd)
02-CO_CGTCCTATAGAG	27	ecEp_nem1(pd)
02-CO_TGACTTTTTATN	42	ecEp_nem1(pd)
02-CO_GATCGCTGATTT	42	ecEp_nem1(pd)
02-CO_TAGCTTTTGCTC	19	ecEp_SC3
02-CO_ACTTGCAGCGGT	27	ecEp_nem1(pd)
02-CO_TGGGGAGCCAAC	27	ecEp_SC3
02-CO_TAGCTTTCATTN	42	ecEp_nem1(pd)
02-CO_ATCGCAACCGAT	27	ecEp_nem1(pd)
02-CO_GGGTAGGAAGCT	42	ecEp_nem1(pd)
02-CO_CTGTTAGTACGG	27	ecEp_nem1(pd)
02-CO_CTAGGCGAGAAN	42	ecEp_nem1(pd)
02-CO_CCGCCAAGACAG	27	ecEp_nem1(pd)
02-CO_ACCCGTATGCCA	27	ecEp_nem1(pd)
02-CO_TGGGTTTGAAGN	27	ecEp_nem1(pd)
02-CO_GCGCTCGGCCAC	42	ecEp_nem1(pd)
02-CO_CGGGATCATCGG	10	ecEp_SC2
02-CO_CAAAGGCGGGCG	42	ecEp_nem1(pd)
02-CO_GTTACTATTGCG	27	ecEp_nem1(pd)
02-CO_TGGAAGACTTGT	42	ecEp_nem1(pd)
02-CO_CTTTCGACAATN	27	ecEp_nem1(pd)
02-CO_ATGGTCCCCCGN	10	ecEp_SC2
02-CO_AAGCTCTCTGGN	42	ecEp_nem1(pd)
02-CO_CATTGCCTTAAN	27	ecEp_nem1(pd)
02-CO_TGACTTGAGCCA	42	ecEp_nem1(pd)
02-CO_AATCTTTTTGTT	27	ecEp_nem1(pd)
02-CO_CTCGCTCATAAN	42	ecEp_nem1(pd)
02-CO_TTGGCGCCCCCA	27	ecEp_SC2
02-CO_TTACCAGGGGCG	27	ecEp_nem1(pd)
02-CO_TTCACCCGTCCC	42	ecEp_nem1(pd)
02-CO_AAGTTAAGTTAN	27	ecEp_nem1(pd)
02-CO_CAGCCAACACGC	42	ecEp_nem1(pd)
02-CO_AATCAAATGGCT	42	ecEp_nem1(pd)
02-CO_ATGGCATCGTTC	42	ecEp_nem1(pd)
02-CO_CGGCGAATCCAT	42	ecEp_nem1(pd)
02-P1_TCAAACTTCATA	42	ecEp_nem1(pd)
02-P1_AAAGACTCCGAC	65	ecEp_nem1(pd)
02-P1_CGCTTGTCGAGG	27	ecEp_nem1(pd)
02-P1_GGTCCCCCTATC	27	ecEp_nem1(pd)
02-P1_CCTTAGCAGTTG	37	ecEp_nem1(pd)
02-P1_CTATATGTCACT	27	ecEp_nem1(pd)
02-P1_CCAAAAGATGTT	27	ecEp_nem1(pd)
02-P1_GCTCGTCATAAN	37	ecEp_nem1(pd)
02-P1_AAATTTTAGTAG	42	ecEp_nem1(pd)
02-P1_CAAAGCCCGTTG	27	ecEp_nem1(pd)
02-P1_GCACCCATCAGA	27	ecEp_nem1(pd)
02-P1_CTAGCACGGTCT	27	ecEp_nem1(pd)
02-P1_CAGTTCAACCGC	42	i_nb4
02-P1_TCTCCCCCTAAG	37	ecEp_nem1(pd)
02-P1_CCTCTAAGCAGC	42	ecEp_nem1(pd)
02-P1_CTGCGGCGTCAT	27	ecEp_nem1(pd)
02-P1_TGAGATTTACTA	37	ecEp_nem1(pd)
02-P1_AAATTCATGGGN	27	ecEp_nem1(pd)
02-P1_GAACACTAAGCA	27	ecEp_nem1(pd)
02-P1_ATGGGCTACCCG	37	ecEp_nem1(pd)
02-P1_GAGGAAGACAGC	27	ecEp_nem1(pd)
02-P1_TTGCAGAGTCAG	42	ecEp_nem1(pd)
02-P1_TTTATATTAGTC	37	ecEp_nem1(pd)
02-P1_CTTGCCGGGCAA	37	ecEp_nem1(pd)
02-P1_TAGTTTCGATTC	42	ecEp_nem1(pd)
02-P1_GTTGTTATGTCN	27	ecEp_nem1(pd)
02-P1_CTGGTACAGTTA	42	ecEp_nem1(pd)
02-P1_AGGTGAATTTGA	42	ecEp_nem1(pd)
02-P1_ACTGGTACCTGG	42	ecEp_nem1(pd)
02-P1_ATCACTGTTTGN	42	ecEp_nem1(pd)
02-P1_TTCGCAAATTCC	42	ecEp_nem1(pd)
02-P1_AACGTGGTTCCN	37	ecEp_nem1(pd)
02-P1_AAGCAAATTAAG	42	ecEp_nem1(pd)
02-P1_CAGTCATAGAGG	27	ecEp_nem1(pd)
02-P1_GTCCCTCCCCAN	37	ecEp_nem1(pd)
02-P1_ATTTATCTCGAC	42	ecEp_nem1(pd)
02-P1_AGCAAATTTCCN	42	ecEp_nem1(pd)
02-P1_CATTAGGGGTCG	37	ecEp_nem1(pd)
02-P1_CTTTGCTCGGTA	27	ecEp_nem1(pd)
02-P1_AGCAAAGTCAGA	42	ecEp_nem1(pd)
02-P1_GCTGGGAGGACC	37	ecEp_SC2
02-P1_ATATGATAGTAG	27	ecEp_nem1(pd)
02-P1_ATGCACTACCTC	27	ecEp_nem1(pd)
02-P1_CGGCCAGCTCGN	27	ecEp_nem1(pd)
02-P1_CGGCTCGTCAGC	9	ecEp_nem1(pd)
02-P1_TGAGCCTACCGN	42	ecEp_nem1(pd)
02-P1_CCTTGGCCCAAN	42	i_nb4
02-P1_ATACATGAGACG	27	ecEp_nem1(pd)
02-P1_TCTTGTCCTCAC	33	ecEp_SC3
02-P1_TGAGCGCGGAAG	27	ecEp_nem1(pd)
02-P1_ACCGGCCCTCAN	42	i_nb4
02-P1_CCTGGGTCAACG	42	ecEp_nem1(pd)
02-P1_TCGCAGGCCACN	9	ecEp_nem1(pd)
02-P1_GTACAAGCTTTG	42	ecEp_nem1(pd)
02-P1_TGGGCCAAGGAN	27	ecEp_nem1(pd)
02-P1_GCCATCTATTTT	27	ecEp_nem1(pd)
02-P1_CAGGGTCTCATA	27	ecEp_nem1(pd)
02-P1_GAGGAGGATCAT	27	ecEp_nem1(pd)
02-P1_CTCAACGATGGC	27	ecEp_nem1(pd)
02-P1_AACAAAGCTGCC	27	ecEp_nem1(pd)
02-P1_TTGCAGTATTTT	37	ecEp_nem1(pd)
02-P1_AGATCAAATGGA	27	ecEp_nem1(pd)
02-P1_AATGCCTGAAAN	27	ecEp_nem1(pd)
02-P1_AGTAACTGCGGN	42	ecEp_nem1(pd)
02-P1_TGTGAACCCGGT	27	ecEp_nem1(pd)
02-P1_AGGAACGATGAA	27	ecEp_nem1(pd)
02-P1_TAATGTTGGCGN	42	ecEp_nem1(pd)
02-P1_GCCGCTGTTGGC	27	ecEp_nem1(pd)
02-P1_CTGTTCATGGAC	27	ecEp_nem1(pd)
02-P1_ACGCACCAGTCA	37	ecEp_nem1(pd)
02-P1_CGAGCGTTGTGN	27	ecEp_nem1(pd)
02-P1_CTTGTCGGGTGT	42	ecEp_nem1(pd)
02-P1_CATTTCGATTGG	42	ecEp_nem1(pd)
02-P1_CGCCCGGTTAAG	42	ecEp_nem1(pd)
02-P1_GGTCTTAGTGTG	37	ecEp_SC2
02-P1_CCGGACTCGATN	9	ecEp_SC2
02-P1_ACCCCCGGCGTA	27	ecEp_nem1(pd)
02-P1_GTTGTTCATTAA	9	ecEp_nem1(pd)
02-P1_TATCGAAACATA	42	ecEp_nem1(pd)
02-P1_ACGGCCTGTCAG	27	ecEp_nem1(pd)
02-P1_AAGCAAATTTCC	42	ecEp_nem1(pd)
02-P1_AGCAGAGTGATC	27	ecEp_nem1(pd)
02-P1_TGCAAGCGGTGN	27	ecEp_nem1(pd)
02-P1_GGCAGCTCATCC	9	ecEp_SC2
02-P1_ATCAAGCGGGGG	42	ecEp_nem1(pd)
02-P1_CCCAAACGCGCC	27	ecEp_nem1(pd)
02-P1_CGTTCGTATGGA	27	ecEp_nem1(pd)
02-P1_TCGTTCGCTGAT	45	ecEp_nem1(pd)
02-P1_ACAGTCGGGAGG	42	ecEp_nem1(pd)
02-P1_AAATTTAGTAGN	42	ecEp_nem1(pd)
02-P1_CATGCTCGGGAG	45	i_nb4
02-P1_GCTGGTGGTGGC	42	ecEp_nem1(pd)
02-P1_CTTTGCGCATCC	42	i_nb4
02-P1_GCCGCGTTGGCN	27	ecEp_nem1(pd)
02-P1_GAGTAGACTCGC	42	i_nb4
02-P1_GCAATACGGTTC	45	ecEp_nem1(pd)
02-P1_ATTCTGGGCACG	65	ecEp_nem1(pd)
02-P1_GGAGTGTAGGTN	27	ecEp_nem1(pd)
02-P1_GTAACGTCGGTG	42	ecEp_nem1(pd)
02-P1_GGCCGGCATGTN	27	ecEp_nem1(pd)
02-P1_GGTAAATCCTAA	58	ecEp_nem1(pd)
02-P1_ATTTATCCGACN	42	ecEp_nem1(pd)
02-P1_GTTGTCATTAAN	10	ecEp_SC2
02-P1_CATGGTAGGCCA	27	ecEp_nem1(pd)
02-P1_GTTGTTTATGTC	42	ecEp_nem1(pd)
02-P1_GCGGTTGGGTAT	42	ecEp_nem1(pd)
02-P1_CCTCAAGCAGCN	42	ecEp_nem1(pd)
02-P1_GAAGCAAAGGCG	42	ecEp_nem1(pd)
02-P1_GGCGCAGACGCG	65	ecEp_nem1(pd)
02-P1_AATGGCCTGAAA	42	ecEp_nem1(pd)
02-P1_TCTCTGACCGAT	65	ecEp_nem1(pd)
02-P1_CACAGAAACTGA	54	i_nb4
02-P1_GCGTTATAGGTT	27	ecEp_nem1(pd)
02-P1_TCTATTGCGTAG	42	i_nb4
02-P1_GGGGTGGATATG	27	ecEp_nem1(pd)
02-P1_GGTGCCACCCAC	42	ecEp_nem1(pd)
02-P1_GCCGCACAAGTA	65	ecEp_nem1(pd)
02-PB_CCCCCGCGGCAN	27	ecEp_nem1(pd)
02-PB_ACTTTTTTGGTT	37	ecEp_nem1(pd)
02-PB_ACAACATTCATA	37	ecEp_nem1(pd)
02-PB_GCTTTCTGAGGA	42	ecEp_nem1(pd)
02-PB_TCCCCCAATTGN	27	ecEp_nem1(pd)
02-PB_CGATCCTGGACG	27	ecEp_nem1(pd)
02-PB_TCGAGATCGCTN	42	ecEp_nem1(pd)
02-PB_TGGAGTCCTCGT	42	ecEp_nem1(pd)
02-PB_ACTGGTACTTTN	37	ecEp_nem1(pd)
02-PB_CATCCAAGAGGN	42	ecEp_nem1(pd)
02-PB_TATTTTTATTCC	27	ecEp_nem1(pd)
02-PB_TTAAAACAGCGN	27	i_nb4
02-PB_AGCCAGTAGAAG	37	ecEp_SC2
02-PB_CTGAGTCCATCA	9	ecEp_nem1(pd)
02-PB_AGTGGGCACTTG	27	ecEp_nem1(pd)
02-PB_GCACTTCGATTT	42	ecEp_nem1(pd)
02-PB_GGAACGGCCTCN	42	ecEp_nem1(pd)
02-PB_TATCGATTTCAN	27	ecEp_nem1(pd)
02-PB_TGAGCTGGGTGC	27	ecEp_nem1(pd)
02-PB_ATAGGATGGCAG	37	ecEp_nem1(pd)
02-PB_ATACCATAGGAA	27	i_nb4
02-PB_TAGACGCTCAAA	9	ecEp_nem1(pd)
02-PB_GGAAGAGTTAAC	8	ecEp_nem1(pd)
02-PB_CGAATGTAGTTC	42	ecEp_nem1(pd)
02-PB_GGGAGCCTGGGC	27	ecEp_nem1(pd)
02-PB_TAGAAGAGTCCG	27	ecEp_nem1(pd)
02-PB_ACCTGGTGAAGN	27	ecEp_nem1(pd)
02-PB_ACAACTGTGGTT	37	ecEp_nem1(pd)
02-PB_GAAGAGAGGAAN	9	ecEp_nem1(pd)
02-PB_GGGAGCTTGAAG	37	ecEp_nem1(pd)
02-PB_AAAGAAGGGGTC	42	ecEp_nem1(pd)
02-PB_GATGTCGGGGAN	9	ecEp_SC3
02-PB_CTCTCGAGTTGN	42	ecEp_nem1(pd)
02-PB_GCAAGAGCGTGA	27	ecEp_nem1(pd)
02-PB_CTCTCGAGTTGT	42	ecEp_nem1(pd)
02-PB_CGGAACGGCCTC	42	ecEp_nem1(pd)
02-PB_GACGTTGGAAAC	27	ecEp_nem1(pd)
02-PB_CAACCGGTGGTT	27	ecEp_nem1(pd)
02-PB_TGGGGACGGTGT	65	ecEp_nem1(pd)
02-PB_GAGAGTGGGGGN	27	ecEp_nem1(pd)
02-PB_GCACTTCGATTN	42	ecEp_nem1(pd)
02-PB_AGAATACGCGTN	27	ecEp_nem1(pd)
02-PB_TCCCCCAATCTG	65	ecEp_nem1(pd)
02-PB_AGCATTCAAGAT	65	ecEp_nem1(pd)
03-KI_CACCCCCGTGTT	33	ecEp_nem1(pd)
03-KI_CACCCTACCGCG	37	ecEp_nem1(pd)
03-KI_GTAGCTGTAATG	37	ecEp_nem1(pd)
03-KI_AAGTTCCTGTCC	27	ecEp_nem1(pd)
03-KI_TCGGACCCTAAG	42	ecEp_nem1(pd)
03-KI_GAATGCTCCGCA	27	ecEp_nem1(pd)
03-KI_CGGTTACGTCGN	9	ecEp_SC2
03-KI_GCTTAAGACGCN	33	ecEp_nem1(pd)
03-KI_CTGCCCGCCAGA	65	ecEp_nem1(pd)
03-KI_CTGTTATGTTCA	27	ecEp_nem1(pd)
03-KI_CGCTTACAGCGC	9	ecEp_nem1(pd)
03-KI_TAGGGAAGTCTC	27	ecEp_nem1(pd)
03-KI_CGTCGTAATATC	33	ecEp_nem1(pd)
03-KI_CAACTCTTAGGT	27	ecEp_nem1(pd)
03-KI_CGCATACTAAGA	42	ecEp_nem1(pd)
03-KI_AGACATCTCCGT	27	ecEp_nem1(pd)
03-KI_CTGTGTGCTCTG	27	ecEp_nem1(pd)
03-KI_TGCCCGGTGCTT	33	ecEp_SC3
03-KI_CGCTACTAAGAN	42	ecEp_nem1(pd)
03-KI_CATTACGGCTAN	33	ecEp_SC2
03-KI_TCTCGATCATGC	33	ecEp_SC3
03-KI_CCCGATGTTGTT	27	ecEp_nem1(pd)
03-KI_GGCGCATACCTG	27	ecEp_nem1(pd)
03-KI_TTGGGATCTGGC	27	ecEp_nem1(pd)
03-KI_TGCGCATCTGAG	27	ecEp_nem1(pd)
03-KI_CCGGCAATTGGT	27	ecEp_nem1(pd)
03-KI_TCGGTGGGAAAG	27	ecEp_nem1(pd)
03-KI_GCGTGTAAACAA	42	ecEp_nem1(pd)
03-KI_CAATACAATGAG	27	ecEp_nem1(pd)
03-KI_TCCAACGGCTGT	27	ecEp_nem1(pd)
03-KI_TAGCCACGTCAG	27	ecEp_nem1(pd)
03-KI_CGAAGGTATGAT	27	ecEp_nem1(pd)
03-KI_GCGATATAAGAT	27	ecEp_nem1(pd)
03-KI_GCGTATAAGATN	27	ecEp_nem1(pd)
03-KI_TACTACCGGTAT	27	ecEp_nem1(pd)
03-KI_TCATAAAACACT	27	ecEp_nem1(pd)
03-KI_CTAAAAATTAAA	42	ecEp_nem1(pd)
03-KI_TCCACGGCTGTN	27	ecEp_nem1(pd)
03-KI_TAGAACTTTCCG	27	ecEp_nem1(pd)
03-KI_TAGACTTTCCGN	27	ecEp_nem1(pd)
03-KI_TTTTCATGAAAT	42	ecEp_nem1(pd)
03-KI_TATTCAGGCATT	27	ecEp_nem1(pd)
03-KI_CTAAAATTAAAN	42	ecEp_nem1(pd)
03-KI_CGAGGTATGATN	27	ecEp_nem1(pd)
03-MA_AATATTAGACTG	37	ecEp_nem1(pd)
03-MA_TATCCCCTGGTA	27	ecEp_nem1(pd)
03-MA_ACTTGTACTCAC	27	ecEp_nem1(pd)
03-MA_GAACCCCGACCN	42	ecEp_nem1(pd)
03-MA_GACCATATTGTC	42	i_nb4
03-MA_CAGTCTTATTCT	37	ecEp_nem1(pd)
03-MA_AATTTAGACTGN	37	ecEp_nem1(pd)
03-MA_TACTCTCTACCG	42	ecEp_nem1(pd)
03-MA_GCCCAGTGCTCN	42	ecEp_nem1(pd)
03-MA_TGGTTAATCTCG	42	ecEp_nem1(pd)
03-MA_GCCACAGTGCTC	42	ecEp_nem1(pd)
03-MA_ATCCTCAACTCT	42	ecEp_nem1(pd)
03-MA_GTCGCCATCAGG	27	ecEp_nem1(pd)
03-FM_CGATCTGATAAA	27	ecEp_nem1(pd)
03-FM_AGGACGGATGCT	27	ecEp_nem1(pd)
03-FM_ATGTGTTACGTA	27	ecEp_nem1(pd)
03-FM_ACGTACGAGGGT	27	ecEp_nem1(pd)
03-FM_TTGGCCGTGGGC	27	ecEp_nem1(pd)
03-FM_AGGACTCATCGT	43	ecEp_nem1(pd)
03-FM_GGGTTACTAGGT	42	ecEp_nem1(pd)
03-FM_TGCACAAGGCAA	43	ecEp_nem1(pd)
03-FM_AGGCGGATGCTN	27	ecEp_nem1(pd)
03-FM_TGCCAAGGCAAN	19	ecEp_nem1(pd)
03-FM_TGTTCTTGGTGG	65	ecEp_nem1(pd)
03-FM_GCTGAAAGGCAG	65	i_nb2
03-FM_GGATACAAGATC	27	ecEp_nem1(pd)
03-FM_ACACTCAAGATA	42	ecEp_nem1(pd)
03-FM_CTAGTGCTTACG	42	ecEp_nem1(pd)
06-FM_GCGTGTGAGGGA	27	ecEp_nem1(pd)
06-FM_AGCGTCTACTTG	27	ecEp_nem1(pd)
06-FM_GCCGGGCAGTAC	42	ecEp_nem1(pd)
06-FM_CCTCCAGCTAGN	27	ecEp_nem1(pd)
06-FM_TACCGAGTATCA	42	ecEp_nem1(pd)
06-FM_CGCCTGCTCCAA	43	ecEp_SC2
06-FM_ATTGAAGACAGC	27	ecEp_nem1(pd)
06-FM_AGCTATTCGCCA	42	ecEp_nem1(pd)
06-FM_CGATGAACAGTA	27	ecEp_nem1(pd)
06-FM_GCACATACCCAG	27	ecEp_nem1(pd)
06-FM_CGGCAATATATC	42	ecEp_nem1(pd)
06-FM_CTCACGGGATAN	42	i_nb4
06-FM_AAACCGCGATTT	65	ecEp_nem1(pd)
06-FM_AAGACGAGATCC	27	ecEp_nem1(pd)
06-FM_TTGTTACCCCGA	27	ecEp_nem1(pd)
06-FM_AACCACTCAACT	27	ecEp_nem1(pd)
06-FM_CCACCTGGACAT	27	ecEp_nem1(pd)
06-FM_TCTTTAAAAAAN	42	ecEp_nem1(pd)
06-FM_CACCCATTATGA	27	ecEp_nem1(pd)
06-FM_CGTTTTGAATCA	27	ecEp_nem1(pd)
06-FM_CCCAGTTGCGGC	37	ecEp_nem1(pd)
06-FM_CCCGTTGCGGCN	37	ecEp_nem1(pd)
06-FM_GCACAGAGTACT	8	ecEp_head
06-FM_CTCAATCCTCTA	42	ecEp_nem1(pd)
06-FM_CTCATCCTCTAN	42	ecEp_nem1(pd)
06-FM_AGCGTTCACTTA	43	ecEp_nem1(pd)
06-FM_AGTATTTTAATT	42	ecEp_nem1(pd)
06-FM_TCTATTAAAAAA	42	ecEp_nem1(pd)
06-FM_ATACTTTGGTCA	27	ecEp_nem1(pd)
06-FM_GCGCTACACCTA	27	ecEp_nem1(pd)
06-FM_CGGTCTGGGGCA	42	i_nb4
06-FM_GCAGCGTATTAA	27	ecEp_nem1(pd)
06-FM_ATTGCTCTTCTA	42	ecEp_nem1(pd)
06-FM_AGGGATCATGAG	42	ecEp_nem1(pd)
06-FM_TGCAGTATGGGC	27	ecEp_nem1(pd)
06-FM_CAGCCTCGCAGN	27	ecEp_nem1(pd)
06-FM_ATTCCATTTAGC	27	ecEp_nem1(pd)
06-FM_TGCGTATGGGCN	27	ecEp_nem1(pd)
06-FM_AGTTTTTAATTN	42	ecEp_nem1(pd)
06-FM_AAGCGAGATCCN	42	ecEp_nem1(pd)
06-FM_CGGAAGTGTACA	27	ecEp_nem1(pd)
06-FM_GCCGTATTATAT	42	ecEp_nem1(pd)
06-FM_TGCGAGGATGCG	42	ecEp_nem1(pd)
06-FM_ACGTCGGCCACA	65	ecEp_nem1(pd)
06-FM_ATCTACCATCTA	42	ecEp_nem1(pd)
06-MA_CCATTACTGGCG	27	ecEp_nem1(pd)
06-MA_TATGATAACTAC	37	ecEp_SC2
06-MA_TCGGACATCAAC	27	ecEp_nem1(pd)
06-KI_CGTGCGAATCGC	27	ecEp_nem1(pd)
06-KI_CGATGGTCTTGG	27	ecEp_nem1(pd)
06-KI_AGTTTGGATTGT	37	ecEp_nem1(pd)
06-KI_TTACGAATGTCT	42	i_nb4
06-KI_ACGTTGGGCCCN	27	ecEp_nem1(pd)
06-KI_AGGCATGTCATT	42	ecEp_nem1(pd)
06-KI_GCTCGTGTCCTG	43	ecEp_nem1(pd)
06-KI_TTTTACACGTGT	27	ecEp_nem1(pd)
06-KI_CCCAACAAAGCC	27	ecEp_nem1(pd)
06-KI_CGATTTATCTCG	27	ecEp_nem1(pd)
06-KI_GCTGCATCTGGT	42	ecEp_nem1(pd)
06-KI_CTAGCAGCTCTT	43	ecEp_SC2
06-KI_TTCTCGGCCTAG	27	ecEp_nem1(pd)
06-KI_GATTTCAAACTG	27	ecEp_nem1(pd)
06-KI_CCGATCCACGCN	42	ecEp_nem1(pd)
06-KI_TGGCCAGAGCGG	27	ecEp_nem1(pd)
06-KI_CGGTGCGATCCT	43	ecEp_nem1(pd)
06-KI_CCATAAACGTGG	27	ecEp_nem1(pd)
06-KI_CGACCTATCTAC	27	ecEp_nem1(pd)
06-KI_CCGCTTTATACT	27	ecEp_nem1(pd)
06-KI_CAGGCGAGATGA	27	ecEp_nem1(pd)
06-KI_CCATGGTTCTGA	42	ecEp_nem1(pd)
06-KI_AAAGCCCTAGAA	27	ecEp_nem1(pd)
06-KI_AGCCTAAGCGTG	43	ecEp_nem1(pd)
06-KI_TGATACTACTCG	27	ecEp_nem1(pd)
06-KI_CCCTTGTATTGT	37	ecEp_nem1(pd)
06-KI_GACGGACAGTTT	27	ecEp_nem1(pd)
06-KI_CCCACAAAGCCN	27	ecEp_nem1(pd)
06-KI_CTCTTGTGCCAT	43	ecEp_SC2
06-KI_GAACGTACCTGC	27	ecEp_nem1(pd)
06-KI_GAACTAATACCG	42	ecEp_nem1(pd)
06-KI_CTCTGCGACCGG	27	ecEp_nem1(pd)
06-KI_GCGCGCCGCTGG	42	ecEp_nem1(pd)
06-KI_GGTTGCGATGAT	27	ecEp_nem1(pd)
06-KI_TTACACGACTCG	43	ecEp_nem1(pd)
06-KI_GTAGTAAAACTT	27	ecEp_nem1(pd)
06-KI_CTTGTTGAGTGA	27	ecEp_nem1(pd)
06-KI_TGGCGCACTACT	27	ecEp_nem1(pd)
06-KI_ATTGGCTAGGTG	27	ecEp_nem1(pd)
06-KI_AGGGCGACGGCG	27	ecEp_nem1(pd)
06-KI_ATGGGCGCGCCT	27	ecEp_nem1(pd)
06-KI_CCGCAGTCCCTN	27	ecEp_nem1(pd)
06-KI_GTTAGGGTGTGN	27	ecEp_nem1(pd)
06-KI_TGTCACTACTAG	27	ecEp_nem1(pd)
06-KI_GCATAGGGCTTA	42	ecEp_nem1(pd)
06-KI_TGGTGACCTAGG	42	ecEp_nem1(pd)
06-KI_TCGTACGCTTGA	42	ecEp_nem1(pd)
06-KI_CGCATGATTGGG	27	ecEp_nem1(pd)
06-KI_GTCGGAATCTTT	27	ecEp_nem1(pd)
06-KI_ATAAATGATTCA	42	ecEp_nem1(pd)
06-KI_AGTTTATTGGTC	27	ecEp_nem1(pd)
06-KI_GCAATCGATGGG	43	ecEp_nem1(pd)
06-KI_TTCGAACCGTTT	42	ecEp_nem1(pd)
06-KI_TGCACTCCAGTN	65	ecEp_nem1(pd)
06-KI_ATATATATAAGC	42	ecEp_nem1(pd)
06-KI_CACGCATAAAAA	27	ecEp_nem1(pd)
06-KI_CAGGTAGTGATG	27	ecEp_nem1(pd)
06-KI_GGGGCACCGTAC	27	ecEp_nem1(pd)
06-KI_ATAATGATTCAN	42	ecEp_nem1(pd)
06-KI_AGGCCAAGCGGA	10	ecEp_SC2
06-KI_CACTTATAGAAT	27	ecEp_nem1(pd)
06-KI_TTTCTGCATGCN	27	ecEp_nem1(pd)
06-KI_GGCGTTTACCTG	42	ecEp_nem1(pd)
06-KI_TTTACTGCATGC	27	ecEp_nem1(pd)
06-KI_TAGACCCTTCTC	43	ecEp_nem1(pd)
06-KI_CGCTGATTGGGN	27	ecEp_nem1(pd)
06-KI_TAGCCCTTCTCN	43	ecEp_SC2
06-KI_CGGACACTAAGC	42	ecEp_nem1(pd)
06-KI_GCATCGATGGGN	43	ecEp_SC2
06-KI_TATCTTCATGTN	27	ecEp_nem1(pd)
06-KI_GTTTGAGAGCAA	42	ecEp_nem1(pd)
06-KI_GACGTTCTCGGN	27	ecEp_nem1(pd)
06-KI_CGCACGCAGCGT	42	i_nb4
06-KI_GACAGTTCTCGG	42	ecEp_nem1(pd)
06-KI_CAGTCTCGCCCT	58	enEp_nem2(pd)
06-KI_TATACTTCATGT	27	ecEp_nem1(pd)
06-KI_CGACTCTACAAG	42	ecEp_nem1(pd)
06-KI_CGTGCCGCGCGG	42	ecEp_nem1(pd)
06-KI_ATCTACATCGTC	42	ecEp_nem1(pd)
11-PO_AGACCGTGAATT	65	ecEp_nem1(pd)
11-PO_TCTCGCGTAGCA	27	ecEp_nem1(pd)
11-PO_CATATCTTCGTT	39	ecEp_nem1(pd)
11-PO_GCATCAGGGTTG	27	ecEp_nem1(pd)
11-PO_ATTTTGCCCTGC	42	ecEp_nem1(pd)
11-PO_TCTCTAATCCTC	37	ecEp_nem1(pd)
11-PO_GTTTGGCTATTA	27	ecEp_nem1(pd)
11-PO_TCGACTCGACTG	27	ecEp_nem1(pd)
11-PO_CCTAGACTCCAG	42	ecEp_nem1(pd)
11-PO_CGTCTGAGAGTA	42	ecEp_nem1(pd)
11-PO_ATCCTCCGTAGA	42	ecEp_nem1(pd)
11-PO_ATAGACCATTCT	27	ecEp_nem1(pd)
11-PO_AGATTCGACCGC	39	ecEp_nem1(pd)
11-PO_ACTTAGTGGCCG	39	ecEp_SC3
11-PO_GGGATCTCGCTA	39	ecEp_nem1(pd)
11-PO_ATGTTTACGTTC	42	ecEp_nem1(pd)
11-PO_CATGGTAGGGAG	37	ecEp_nem1(pd)
11-PO_GGCCGAAGAGCG	37	ecEp_nem1(pd)
11-PO_TACGCTACCGGG	42	ecEp_nem1(pd)
11-PO_AGGAGATCTCTC	42	ecEp_nem1(pd)
11-PO_GCTCACATGTAT	39	ecEp_nem1(pd)
11-PO_CCGCAGTGGCTT	42	i_nb4
11-PO_ACCGCACCCTCA	27	ecEp_nem1(pd)
11-PO_ACGCCGCTTTAT	65	ecEp_nem1(pd)
11-PO_TAACGCAAGCAA	27	ecEp_nem1(pd)
11-PO_ATTTAAACTTCG	27	ecEp_nem1(pd)
11-PO_AAATTAGCCTCC	42	ecEp_nem1(pd)
11-PO_ATCGACACAAAC	42	ecEp_nem1(pd)
11-PO_CTCAGACCAACG	42	ecEp_nem1(pd)
11-PO_GGCTAGGTGGAC	42	ecEp_nem1(pd)
11-PO_TCGAGCCGCCGT	65	ecEp_nem1(pd)
11-PO_CGGCACGCTGAA	39	ecEp_nem1(pd)
11-PO_CGGCTCACATGT	42	ecEp_nem1(pd)
11-PO_AGATTTAAGGTG	27	ecEp_nem1(pd)
11-PO_CACCTTACTCAG	42	ecEp_nem1(pd)
11-PO_TGACAATTAGCG	27	ecEp_nem1(pd)
11-PO_GTCGGCGAAAGT	27	ecEp_nem1(pd)
11-PO_TGCCGCCTTTAA	42	ecEp_nem1(pd)
11-PO_GTCTAGCGACAC	27	ecEp_nem1(pd)
11-PO_GCACAGGCGCCT	27	ecEp_nem1(pd)
11-PO_TTGGGATACTTC	27	ecEp_nem1(pd)
11-PO_GGGTTAATGTCC	27	ecEp_nem1(pd)
11-PO_GGTAAATCCAGG	42	ecEp_nem1(pd)
11-PO_TGCAGATCCATA	42	i_nb4
11-PO_ACGGGTTGTGGT	27	ecEp_SC2
11-PO_TACGCAGGTAGG	42	ecEp_nem1(pd)
11-PO_TGAGTCTGTGGA	27	ecEp_nem1(pd)
11-PO_ATCGGGGAGAGT	27	ecEp_nem1(pd)
11-PO_CCTATATCTCGC	27	ecEp_nem1(pd)
11-PO_TCAGCCACGTGG	27	ecEp_nem1(pd)
11-PO_AAATTATCTAGG	27	ecEp_nem1(pd)
11-PO_GTCTACTTGACA	42	ecEp_nem1(pd)
11-PO_AGGATTGGTAAG	27	ecEp_nem1(pd)
11-PO_CGGCTAGGACTG	27	ecEp_nem1(pd)
11-PO_GGCCTACTCCAG	42	ecEp_nem1(pd)
11-PO_GAAACTTCGTCT	39	ecEp_SC2
11-PO_ATCATGGCAGCT	42	ecEp_nem1(pd)
11-PO_AGGTCTCATAGA	42	ecEp_nem1(pd)
11-PO_AATTTATGGGTT	42	ecEp_nem1(pd)
11-PO_GCCACCCCTCGC	27	ecEp_nem1(pd)
11-PO_TCACGGGCTAGA	27	ecEp_nem1(pd)
11-PO_GGTTAAATTGGT	42	ecEp_nem1(pd)
11-PO_AAGCTGGCCCAG	42	ecEp_nem1(pd)
11-PO_TTAGAGAGCATA	42	ecEp_nem1(pd)
11-PO_GGCCCCTTCTAG	10	ecEp_head
11-PO_TGGTCTCTTATA	27	ecEp_nem1(pd)
11-PO_GAGGGCGTACGG	42	ecEp_nem1(pd)
11-PO_TGACCTTGCTCC	27	ecEp_nem1(pd)
11-PO_CCCAGATCTACC	42	ecEp_nem1(pd)
11-PO_CCGCGTAGATGC	42	ecEp_nem1(pd)
11-PO_TTTCCGCCCGCC	42	ecEp_nem1(pd)
11-PO_GCAAAGCGAATT	42	ecEp_nem1(pd)
11-PO_ATGTGGTACATA	27	ecEp_nem1(pd)
11-PO_CAAGAAACTACA	27	ecEp_nem1(pd)
11-PO_CAGCGCTCAGAG	42	ecEp_nem1(pd)
11-PO_CAGGGCTTCGCG	65	ecEp_nem1(pd)
11-PO_CGGTCAGAGATT	42	ecEp_nem1(pd)
11-PO_AATTCTTTCTGG	42	ecEp_nem1(pd)
11-BU_GCGCTCTCCCCT	37	ecEp_SC2
11-BU_TTACGCTTTCCG	39	ecEp_nem1(pd)
11-BU_TCCATATCATCA	39	ecEp_nem1(pd)
11-BU_CTAGACCCTCTT	37	ecEp_SC2
11-BU_AGTTTGACCAGA	27	ecEp_nem1(pd)
11-BU_AAGATCCTGTCG	27	ecEp_nem1(pd)
11-BU_CGTTATGCGCTA	27	ecEp_nem1(pd)
11-BU_CCGCAACGACAA	27	ecEp_nem1(pd)
11-BU_GAGCCCGTTGAC	27	ecEp_nem1(pd)
11-BU_CCACTACCCGGG	27	ecEp_nem1(pd)
11-BU_CCTGATGACTGA	39	ecEp_nem1(pd)
11-BU_GGCTAGGTTCCG	27	ecEp_nem1(pd)
11-BU_TGGGCACTGATT	39	ecEp_nem1(pd)
11-BU_CGCAACTTGTCT	39	ecEp_SC2
11-BU_CAGATCCAGCAA	42	ecEp_nem1(pd)
11-BU_ATTAAGCCATAA	42	ecEp_nem1(pd)
11-BU_TCACGTGACATT	37	ecEp_nem1(pd)
11-BU_CTGATGAGAGAC	27	i_nb4
11-BU_CTGTTTAGTATG	39	ecEp_nem1(pd)
11-BU_CATCTCCCCCGC	42	ecEp_nem1(pd)
11-BU_GACGTGGTGCTC	27	ecEp_nem1(pd)
11-BU_TAAATACGAACC	27	ecEp_nem1(pd)
11-BU_CTGAACGTATAG	27	ecEp_nem1(pd)
11-BU_TCGTGTGCCAAC	27	ecEp_nem1(pd)
11-BU_AGCGGACGTAAG	27	ecEp_nem1(pd)
11-BU_ATTCTACTTCAC	27	ecEp_nem1(pd)
11-BU_GTATACAGTTGA	42	ecEp_nem1(pd)
11-BU_CTTTTGCGGGCC	27	ecEp_nem1(pd)
11-BU_TTGAATGCCCTG	27	ecEp_nem1(pd)
11-BU_AATAACCATCCC	42	ecEp_nem1(pd)
11-BU_GAGACCTCGCGA	65	ecEp_nem1(pd)
11-BU_TGGCCATACAGT	39	ecEp_SC2
11-BU_CTTCTCCAGGGT	39	ecEp_SC2
11-BU_CGTGTGTTTACG	42	ecEp_nem1(pd)
11-BU_TGGTCCCCCGCA	27	ecEp_nem1(pd)
11-BU_GTAGTCGGACAC	37	ecEp_nem1(pd)
11-BU_GAAGTTCGCGTC	42	ecEp_nem1(pd)
11-BU_ACAGCTGTCTGG	65	ecEp_nem1(pd)
11-BU_TGCTTCAGAATC	27	ecEp_nem1(pd)
11-BU_ACTAAACAGCCC	42	ecEp_nem1(pd)
11-BU_CTAGCGAATTCA	42	ecEp_nem1(pd)
11-BU_GCATACATCTGC	27	ecEp_nem1(pd)
11-BU_GAGGAGGTCACT	27	ecEp_nem1(pd)
11-BU_GCCGCAGGTACA	39	ecEp_nem1(pd)
11-BU_GCTTCCATCGAT	39	ecEp_nem1(pd)
11-BU_AGATTGGACATC	27	ecEp_nem1(pd)
11-BU_TCGGGCACTTGC	39	ecEp_SC2
11-BU_CCGCCGGTCAGA	65	ecEp_nem1(pd)
[truncated: 23,053 more rows]

## Sheet: Schmidtea mediterranea
Cell name	Leiden cluster	Cell type
Cells_Trunk_GTCGTATTTTTT	14	Neoblast: 0
Cells_Trunk_GACAATGAGCGC	13	Epidermal: 11
Cells_Trunk_CCAGCGATCGTA	39	Epidermal: 11
Cells_Trunk_ATCCTGAAAGTT	24	Neoblast: 0
Cells_Trunk_TAAAAGGTGAAG	15	Cathepsin+ cells: 4
Cells_Trunk_ACATCTACTAAT	20	Cathepsin+ cells: 4
Cells_Trunk_ACGGCCAACTTA	14	Neoblast: 0
Cells_Trunk_CTTCAATGCACA	35	Epidermal: 24
Cells_Trunk_TTCTACCATGTA	12	Intestine: 6
Cells_Trunk_CAAGTTTAATCA	24	Neoblast: 22
Cells_Trunk_TAAGGGCACACT	12	Intestine: 6
Cells_Trunk_CATAACTTAACN	61	Epidermal: 2
Cells_Trunk_TCAAACTCATCC	0	Neoblast: 0
Cells_Trunk_TGTTAGTGTGAT	13	Epidermal: 11
Cells_Trunk_ACGCGCACTGAT	24	Cathepsin+ cells: 4
Cells_Trunk_TACATTTACTGT	0	Neoblast: 0
Cells_Trunk_CATATGAGATAG	31	Intestine: 6
Cells_Trunk_TAACAACGAGAN	0	Neoblast: 0
Cells_Trunk_AGTAATACTTAT	12	Intestine: 6
Cells_Trunk_TACGCTTTTTCT	52	Epidermal: 35
Cells_Trunk_GCATTAAGAATA	12	Intestine: 6
Cells_Trunk_GAAGTTCGCCCT	12	Intestine: 6
Cells_Trunk_TCAATCTCAAGA	12	Intestine: 6
Cells_Trunk_GTTATTTTGCAC	18	Cathepsin+ cells: 10
Cells_Trunk_TTGAACTCTTTT	1	Epidermal: 2
Cells_Trunk_GGCTGCGGTCTT	25	Cathepsin+ cells: 17
Cells_Trunk_AAACTTAAACTC	12	Intestine: 6
Cells_Trunk_CGCTATCCTACC	2	Epidermal: 2
Cells_Trunk_TAAGCTCTAAAA	2	Epidermal: 2
Cells_Trunk_GCCTCCACGCTC	24	Neoblast: 22
Cells_Trunk_AGGTTATTCAAT	0	Neoblast: 0
Cells_Trunk_AGTGGCCCACTT	31	Intestine: 6
Cells_Trunk_CAGTTTTGCTTG	12	Intestine: 6
Cells_Trunk_CGGAACCCACTA	0	Neoblast: 0
Cells_Trunk_GAAACGTACTTA	11	Epidermal: 2
Cells_Trunk_TTTTGGATATAN	20	Cathepsin+ cells: 4
Cells_Trunk_CAGAATCTAGTN	24	Neoblast: 0
Cells_Trunk_ATCCAAGTTTCC	18	Cathepsin+ cells: 4
Cells_Trunk_CAAAAGCGTAAA	0	Neoblast: 0
Cells_Trunk_AAGCAAGAAAGC	2	Epidermal: 2
Cells_Trunk_CATTTCGGCAAT	1	Epidermal: 2
Cells_Trunk_ATTAACGAATCN	30	Neoblast: 0
Cells_Trunk_TGAGCAGGTATT	12	Intestine: 6
Cells_Trunk_ATCTCCCTGATC	13	Epidermal: 11
Cells_Trunk_CTCGAACCAAAG	12	Intestine: 6
Cells_Trunk_TAACAGCAGTCG	0	Neoblast: 0
Cells_Trunk_CCCGGAGACTTT	12	Intestine: 6
Cells_Trunk_AGAGATCAAATT	1	Epidermal: 2
Cells_Trunk_TTACTTACGCTT	29	Pharynx: 25
Cells_Trunk_TTACGGGCTACT	11	Epidermal: 2
Cells_Trunk_CTCTCCATAAAT	1	Epidermal: 2
Cells_Trunk_GAGTTTGATGCG	5	Epidermal: 3
Cells_Trunk_GACTTTGAGGCG	14	Neoblast: 0
Cells_Trunk_CGACAGCGACAA	1	Epidermal: 3
Cells_Trunk_ATACCTCTCTTA	1	Epidermal: 2
Cells_Trunk_GCCTCGTTGACT	14	Neoblast: 0
Cells_Trunk_ATCTAGTCGACN	0	Neoblast: 0
Cells_Trunk_CCCCCTCAAAGT	42	Intestine: 30
Cells_Trunk_CCTAATCAACGT	24	Neoblast: 22
Cells_Trunk_CACCACTAGCGC	1	Epidermal: 3
Cells_Trunk_GACGAGACGACC	1	Epidermal: 3
Cells_Trunk_GTATAACACCCA	0	Neoblast: 0
Cells_Trunk_TGTACAGATATC	1	Epidermal: 2
Cells_Trunk_ATACCAGGCTTC	2	Epidermal: 2
Cells_Trunk_CCGTATTGTGTT	34	Parapharyngeal: 12
Cells_Trunk_TGGTTAACAATA	14	Neoblast: 0
Cells_Trunk_CATACTAGAGCA	1	Epidermal: 2
Cells_Trunk_TACCCGACAAAN	12	Intestine: 6
Cells_Trunk_CTGCTTATCAGN	1	Epidermal: 3
Cells_Trunk_AGTATTCGTCAC	42	Intestine: 30
Cells_Trunk_CGAATAGAGCTA	32	Parapharyngeal: 12
Cells_Trunk_ACCCACCGTCCC	12	Intestine: 6
Cells_Trunk_TAAGAGATCACG	1	Epidermal: 2
Cells_Trunk_CCGTGCGACTCT	11	Epidermal: 2
Cells_Trunk_CCTTGACTGGGG	12	Intestine: 6
Cells_Trunk_TAAACTACACAA	14	Neoblast: 0
Cells_Trunk_GAGCTCCAGAGA	61	Cathepsin+ cells: 15
Cells_Trunk_TGAAGAACAATT	31	Intestine: 6
Cells_Trunk_CGAGCGTGCTGA	24	Neoblast: 22
Cells_Trunk_CCTAATGGAGAC	18	Cathepsin+ cells: 10
Cells_Trunk_GACGGATGTCAA	0	Neoblast: 0
Cells_Trunk_AGTCCTGTTCGA	0	Neoblast: 0
Cells_Trunk_AGGAAAGTGGAT	12	Intestine: 6
Cells_Trunk_CTGACGCTAAAC	11	Epidermal: 2
Cells_Trunk_CTTCCAATCCAA	17	Cathepsin+ cells: 15
Cells_Trunk_GGTTCTATCATA	45	Cathepsin+ cells: 28
Cells_Trunk_GAGTTAGAGGTC	20	Cathepsin+ cells: 4
Cells_Trunk_ATCTATCAGGGN	12	Intestine: 6
Cells_Trunk_ACTGTGTAAGTT	0	Neoblast: 0
Cells_Trunk_TCGCTGCTCAAN	2	Epidermal: 2
Cells_Trunk_TGTTCAATAGTC	39	Epidermal: 11
Cells_Trunk_CAGGACTAATTG	2	Epidermal: 2
Cells_Trunk_ATATACAACCAA	31	Intestine: 6
Cells_Trunk_TAGGGCTTATAA	0	Neoblast: 0
Cells_Trunk_CACCTGCCATCC	12	Intestine: 6
Cells_Trunk_ACAACTACGTAN	30	Epidermal: 3
Cells_Trunk_CGTGATAGTATA	12	Intestine: 6
Cells_Trunk_AATAACTCTGGT	35	Epidermal: 24
Cells_Trunk_CTATCAGTGAGG	0	Neoblast: 0
Cells_Trunk_AATATTGGCGTC	17	Cathepsin+ cells: 15
Cells_Trunk_ATGGTTTCAACA	12	Intestine: 6
Cells_Trunk_GACTCATCGGTC	11	Epidermal: 2
Cells_Trunk_CCAACCATCCCG	1	Epidermal: 2
Cells_Trunk_CCACCGGAGCCG	12	Intestine: 6
Cells_Trunk_CTAGTGAGATGA	27	Intestine: 19
Cells_Trunk_CAAACTTCCGCC	2	Epidermal: 2
Cells_Trunk_TTCGATATAACA	33	Neural: 18
Cells_Trunk_CACGACGGTTAT	18	Cathepsin+ cells: 10
Cells_Trunk_TTAACGTCCTGT	39	Epidermal: 11
Cells_Trunk_TGTAATCAGTTT	0	Neoblast: 0
Cells_Trunk_ATTAAGCCGGAT	0	Neoblast: 0
Cells_Trunk_ATACACTAGATN	16	Muscle: 7
Cells_Trunk_GTGCACGTCTAC	0	Neoblast: 0
Cells_Trunk_TTATCTACATTG	0	Neoblast: 0
Cells_Trunk_ATTCCACAAGGC	11	Epidermal: 2
Cells_Trunk_CCAGGCCAGCTC	0	Neoblast: 0
Cells_Trunk_TCACTATCACAC	0	Neoblast: 0
Cells_Trunk_CAGTAAATGAAG	2	Epidermal: 2
Cells_Trunk_GTCTGCCTATGC	12	Intestine: 6
Cells_Trunk_CGTGCTGTGCCT	2	Epidermal: 2
Cells_Trunk_CTCGCCTACCCT	1	Epidermal: 2
Cells_Trunk_CTTCCATACATC	1	Epidermal: 2
Cells_Trunk_ACCCACACTAGN	2	Epidermal: 2
Cells_Trunk_CACCTAATCTGT	20	Cathepsin+ cells: 4
Cells_Trunk_GCAGAGACATCG	0	Neoblast: 0
Cells_Trunk_GTCAGCCCAAAG	4	Cathepsin+ cells: 4
Cells_Trunk_AATCACAAGAAG	13	Epidermal: 11
Cells_Trunk_CCGCTTAAACCT	12	Intestine: 6
Cells_Trunk_TCCAACCTTCTC	13	Epidermal: 11
Cells_Trunk_CACCAGCTTAGC	52	Epidermal: 35
Cells_Trunk_GTCTATATGGAT	42	Intestine: 30
Cells_Trunk_TGAGTGATTCCA	14	Neoblast: 0
Cells_Trunk_GCTTTTTTAGAT	12	Intestine: 6
Cells_Trunk_TTAGTCCGATAC	0	Neoblast: 0
Cells_Trunk_ATCCGTCGAACA	35	Epidermal: 24
Cells_Trunk_TAAATCCTTGGC	12	Intestine: 6
Cells_Trunk_TGAAAAATAGGT	11	Epidermal: 2
Cells_Trunk_GATCTGGCAAAG	2	Epidermal: 2
Cells_Trunk_GACCGTTAGAAC	18	Cathepsin+ cells: 10
Cells_Trunk_AATTAATTCAAG	2	Epidermal: 2
Cells_Trunk_CGCAGCTTTTGT	2	Epidermal: 2
Cells_Trunk_CTTTGAAAATCT	1	Epidermal: 2
Cells_Trunk_AGTAAATTTTGC	5	Neoblast: 0
Cells_Trunk_GGTTCTTTTGTA	46	Parapharyngeal: 12
Cells_Trunk_CAACACACGTGT	0	Neoblast: 0
Cells_Trunk_CTACACAGTTTA	0	Neoblast: 0
Cells_Trunk_CGATTGACATTA	7	Cathepsin+ cells: 4
Cells_Trunk_AAATACCCTCCA	25	Cathepsin+ cells: 17
Cells_Trunk_TGCAGCCGGCGG	12	Intestine: 6
Cells_Trunk_ATTGAGTTTAAA	27	Intestine: 6
Cells_Trunk_AGAACTGGTAAC	1	Epidermal: 2
Cells_Trunk_ACTCAAAATGGG	2	Epidermal: 2
Cells_Trunk_CTTTAGCACGTN	18	Cathepsin+ cells: 4
Cells_Trunk_GATTTCATCAAG	2	Epidermal: 2
Cells_Trunk_TCGACGAACCGG	18	Cathepsin+ cells: 10
Cells_Trunk_GTCTGAGACTAG	6	Neural: 1
Cells_Trunk_CTGAGCTGTAAT	12	Intestine: 6
Cells_Trunk_ACGAGACATAGC	11	Epidermal: 2
Cells_Trunk_TATAGCAGCGAT	11	Epidermal: 2
Cells_Trunk_TTTGGAGACCTA	1	Epidermal: 3
Cells_Trunk_ACCTTTACTACG	29	Pharynx: 25
Cells_Trunk_GGCTCGTTATCT	5	Epidermal: 3
Cells_Trunk_TAACGCACTATG	14	Neoblast: 0
Cells_Trunk_GTCTTCCTAGCA	2	Epidermal: 2
Cells_Trunk_TTTGGTAGATTG	1	Epidermal: 2
Cells_Trunk_TAGGCCCGGTCA	0	Neoblast: 0
Cells_Trunk_CCTCCAACCTCT	29	Pharynx: 25
Cells_Trunk_TTCAGTCATATC	11	Epidermal: 2
Cells_Trunk_ATAGATTCGACT	4	Neoblast: 0
Cells_Trunk_AACCATAGTATA	13	Epidermal: 11
Cells_Trunk_TATCGTAAACAA	11	Epidermal: 2
Cells_Trunk_GTCATCTTGAGG	24	Intestine: 6
Cells_Trunk_ACTCCAAGGTTN	17	Cathepsin+ cells: 15
Cells_Trunk_GATTGTACCGAC	12	Intestine: 6
Cells_Trunk_TTATCAGGACTT	12	Intestine: 6
Cells_Trunk_GGAATTTCAGTA	0	Neoblast: 22
Cells_Trunk_GCTATTGAGAAA	0	Neoblast: 0
Cells_Trunk_CGACCTCAAAAT	12	Intestine: 6
Cells_Trunk_AGCGACCTGTGC	0	Neoblast: 0
Cells_Trunk_GGTCCCCAATCN	12	Intestine: 6
Cells_Trunk_GAGCTACCGGAA	5	Epidermal: 3
Cells_Trunk_GGTATCGTATTG	0	Neoblast: 0
Cells_Trunk_GCGATCTCTCCG	13	Epidermal: 11
Cells_Trunk_CGGCGTCTACTA	12	Intestine: 6
Cells_Trunk_CATAGTATAGAG	45	Cathepsin+ cells: 28
Cells_Trunk_TAATGTACTAGA	18	Cathepsin+ cells: 10
Cells_Trunk_CCCTGGTCAAAN	11	Epidermal: 2
Cells_Trunk_ACCAGTGCCAAT	39	Epidermal: 11
Cells_Trunk_CCCTATATCCGN	31	Intestine: 6
Cells_Trunk_CATGGGATTAGC	18	Cathepsin+ cells: 10
Cells_Trunk_CTTGAGAACTCT	1	Epidermal: 2
Cells_Trunk_AAGAGTTAGATG	4	Cathepsin+ cells: 4
Cells_Trunk_CTCTTTCCGGCC	1	Epidermal: 2
Cells_Trunk_ACAACGAATTGA	17	Cathepsin+ cells: 17
Cells_Trunk_TACGAGGAGACG	31	Intestine: 6
Cells_Trunk_ACATATCCTAGC	31	Intestine: 6
Cells_Trunk_CCTTTTAGAACT	0	Neoblast: 0
Cells_Trunk_AGCCCTAATGCT	39	Epidermal: 2
Cells_Trunk_CCTCCAACGAGT	30	Pharynx: 25
Cells_Trunk_AAAATTAGGTGC	24	Neoblast: 0
Cells_Trunk_GTCGAACATATA	16	Muscle: 7
Cells_Trunk_TTCTTACTCCAT	18	Cathepsin+ cells: 4
Cells_Trunk_ACATAGCGAGTA	18	Cathepsin+ cells: 4
Cells_Trunk_AATAAAAGGCTA	11	Epidermal: 2
Cells_Trunk_GCACCCTCCAAG	19	Neural: 20
Cells_Trunk_CCAACCATGCGT	0	Neoblast: 0
Cells_Trunk_CGCGAGTGTGCA	24	Neoblast: 22
Cells_Trunk_GACAGAACAGCC	2	Epidermal: 2
Cells_Trunk_AGTCTCACCGGA	54	Parapharyngeal: 12
Cells_Trunk_TGCTAGAAAGCT	12	Intestine: 6
Cells_Trunk_ATAACTATACAG	61	Epidermal: 2
Cells_Trunk_ACGAGCTCGGGA	30	Epidermal: 3
Cells_Trunk_TGGATATGACGG	11	Epidermal: 2
Cells_Trunk_CCAGTTTCCGGG	13	Epidermal: 11
Cells_Trunk_CACTGGATGGAT	12	Intestine: 6
Cells_Trunk_CGCTTTTGCGTT	27	Intestine: 19
Cells_Trunk_ACAATATTAGGT	7	Cathepsin+ cells: 4
Cells_Trunk_CACCGATATACG	18	Cathepsin+ cells: 10
Cells_Trunk_ACTTGTTTGATC	5	Epidermal: 3
Cells_Trunk_TGATCTAGATGC	42	Intestine: 30
Cells_Trunk_TATCCTTCCTTA	30	Epidermal: 3
Cells_Trunk_GGAGTCCTCATN	11	Epidermal: 2
Cells_Trunk_CAAACCAGAATN	1	Epidermal: 2
Cells_Trunk_CCGAAACCGGAT	1	Epidermal: 2
Cells_Trunk_TCCGTTCGGGTG	2	Epidermal: 2
Cells_Trunk_CGAGTTCCTCCA	1	Epidermal: 2
Cells_Trunk_TTGCACGGACGT	12	Intestine: 6
Cells_Trunk_CTACGTTTTTAC	15	Cathepsin+ cells: 4
Cells_Trunk_CTTACGTCCTGN	30	Epidermal: 3
Cells_Trunk_ACCATATGTACA	36	Protonephridia: 26
Cells_Trunk_ACAGGTGCCTTC	24	Neoblast: 22
Cells_Trunk_CATTGGGCTGCN	16	Muscle: 7
Cells_Trunk_TCCCGAGTGTCA	12	Intestine: 6
Cells_Trunk_TGCCCACTACAC	2	Epidermal: 2
Cells_Trunk_CGACACGAATGT	34	Parapharyngeal: 12
Cells_Trunk_TCGATTTCCGTN	13	Epidermal: 11
Cells_Trunk_CTGAGATTTGCT	14	Epidermal: 3
Cells_Trunk_GTTGGACCAGCA	5	Epidermal: 3
Cells_Trunk_CTCAAGCTGAAN	42	Intestine: 30
Cells_Trunk_AATCCTCGGATT	12	Intestine: 6
Cells_Trunk_GTTGCCCCAGGC	12	Intestine: 6
Cells_Trunk_CTCTAGACTGTC	1	Epidermal: 3
Cells_Trunk_TAGAACCTTGTG	21	Muscle: 7
Cells_Trunk_TATCGCCTTAAN	46	Parapharyngeal: 12
Cells_Trunk_GTCATTGGATGT	42	Intestine: 43
Cells_Trunk_TGAGTCTCCTCG	2	Epidermal: 2
Cells_Trunk_GTTAACACTTGC	0	Neoblast: 0
Cells_Trunk_GTGTTCTCTAAA	14	Neoblast: 0
Cells_Trunk_TCCCCACGGTCA	0	Neoblast: 0
Cells_Trunk_AGCGCTACACAN	15	Cathepsin+ cells: 4
Cells_Trunk_TTCGGCGACGCG	12	Intestine: 6
Cells_Trunk_CTCCTCACGTCT	12	Intestine: 6
Cells_Trunk_CCTGACCTTGTG	2	Epidermal: 2
Cells_Trunk_TACTTGAGACCA	21	Muscle: 7
Cells_Trunk_CCGGCTGGGGTG	12	Intestine: 6
Cells_Trunk_AACAGGTATTGC	20	Cathepsin+ cells: 4
Cells_Trunk_CTTGACTGATTN	41	Protonephridia: 29
Cells_Trunk_TCGTCTGCTCAA	2	Epidermal: 2
Cells_Trunk_AACGAGAGATCG	2	Epidermal: 2
Cells_Trunk_CTAATAGACGTT	1	Epidermal: 2
Cells_Trunk_ATTGTTGTTATA	1	Epidermal: 2
Cells_Trunk_CTAGAGTATAGG	5	Epidermal: 3
Cells_Trunk_ATAAGGCAGCGA	2	Epidermal: 2
Cells_Trunk_TGGAAAACACTC	0	Neoblast: 0
Cells_Trunk_AACCTAAATTAC	17	Cathepsin+ cells: 15
Cells_Trunk_TCCACTTATGCA	2	Epidermal: 2
Cells_Trunk_CCAGATTTGTAT	24	Epidermal: 3
Cells_Trunk_GCCGATGCACCA	0	Neoblast: 0
Cells_Trunk_CATCGAACTTCC	27	Intestine: 19
Cells_Trunk_GATCCAGCTTCC	5	Epidermal: 3
Cells_Trunk_ATCTTAGTAATT	16	Muscle: 7
Cells_Trunk_AGTTGCTTTCGN	0	Neoblast: 0
Cells_Trunk_GGCTGCCGGAAC	31	Intestine: 6
Cells_Trunk_CTTATGAGATTN	15	Cathepsin+ cells: 4
Cells_Trunk_CATATCTAGCAG	31	Intestine: 6
Cells_Trunk_CCTATAGTCCAN	5	Epidermal: 3
Cells_Trunk_TCGTTTGCAAAC	5	Epidermal: 3
Cells_Trunk_CCACTCATTTGA	29	Pharynx: 25
Cells_Trunk_TCCTTGATCGGG	16	Muscle: 7
Cells_Trunk_CGGTTCATCGGA	30	Epidermal: 3
Cells_Trunk_CGTGATCAACGT	45	Cathepsin+ cells: 28
Cells_Trunk_GGCCCTGTCGAC	1	Epidermal: 2
Cells_Trunk_TAGGGCCTCGTC	2	Epidermal: 2
Cells_Trunk_ACTTCGCTGTTA	2	Epidermal: 2
Cells_Trunk_CCAATCAACTTN	5	Epidermal: 3
Cells_Trunk_ACGTGAGCAGAA	18	Cathepsin+ cells: 4
Cells_Trunk_CCCTAGGCTAAT	20	Cathepsin+ cells: 4
Cells_Trunk_ACCCCCTAAGTC	2	Epidermal: 2
Cells_Trunk_GGGCCTACATAG	2	Epidermal: 2
Cells_Trunk_CCACACTCCCGT	18	Cathepsin+ cells: 4
Cells_Trunk_TTGCGCGTCTGA	2	Epidermal: 2
Cells_Trunk_ATTTGTTTGGCT	1	Epidermal: 2
Cells_Trunk_GCAATGGCTTTT	1	Epidermal: 3
Cells_Trunk_GACCACGAACGC	20	Cathepsin+ cells: 4
Cells_Trunk_AGATCGCTAATA	5	Epidermal: 3
Cells_Trunk_GCATCTGGTTAG	17	Cathepsin+ cells: 15
Cells_Trunk_ACATTTAGAGTT	4	Neoblast: 0
Cells_Trunk_AGTCATTAATTG	17	Cathepsin+ cells: 4
Cells_Trunk_GCGGTGGGGCTG	1	Epidermal: 2
Cells_Trunk_ATCATTAAGATA	17	Cathepsin+ cells: 15
Cells_Trunk_GGCCGCCAAGAA	40	Parapharyngeal: 38
Cells_Trunk_CCACAATCCTTC	18	Cathepsin+ cells: 10
Cells_Trunk_CTTCCTCATGTN	2	Epidermal: 2
Cells_Trunk_CTACACCATCCN	20	Cathepsin+ cells: 4
Cells_Trunk_CATTCGCCGATT	32	Neoblast: 0
Cells_Trunk_AAAAGTAGCATT	12	Intestine: 6
Cells_Trunk_CGTTTGTTATGA	5	Epidermal: 3
Cells_Trunk_CCCGCGGTACAN	1	Epidermal: 3
Cells_Trunk_ATGATGTAATTT	15	Cathepsin+ cells: 4
Cells_Trunk_GTTCTCCAATCC	12	Intestine: 6
Cells_Trunk_GCCGAGCTATAC	24	Neoblast: 22
Cells_Trunk_AAAGAGTCGGTC	52	Epidermal: 35
Cells_Trunk_CGTAAAAACACA	16	Muscle: 7
Cells_Trunk_GCGTATTAATAT	1	Epidermal: 3
Cells_Trunk_CTATTGGCCGTT	42	Pharynx: 25
Cells_Trunk_GCCACTAGGTAA	2	Epidermal: 2
Cells_Trunk_ACAGCGATCTCG	20	Cathepsin+ cells: 4
Cells_Trunk_CCATAGCGGAAC	2	Epidermal: 2
Cells_Trunk_CTTCCTTAGTAA	0	Neoblast: 0
Cells_Trunk_TCGACGTCCGAG	14	Neoblast: 0
Cells_Trunk_GCCATAGCATTC	40	Parapharyngeal: 12
Cells_Trunk_TCGCCTTACTCA	15	Cathepsin+ cells: 4
Cells_Trunk_TGAAGCCCCGCC	18	Cathepsin+ cells: 4
Cells_Trunk_ACTTGCATCTAC	31	Intestine: 6
Cells_Trunk_GCTCTGTATCAC	24	Neoblast: 22
Cells_Trunk_GTACCGGTTCCT	0	Neoblast: 0
Cells_Trunk_TGATCAATTAGA	20	Cathepsin+ cells: 4
Cells_Trunk_GGTCTGTAAGCN	13	Epidermal: 11
Cells_Trunk_TACATGATTTGN	21	Muscle: 7
Cells_Trunk_AAGATATCTTCC	17	Cathepsin+ cells: 15
Cells_Trunk_TGAGTTTCGCTC	0	Neoblast: 0
Cells_Trunk_AAGATTGTCTAG	21	Muscle: 14
Cells_Trunk_GTCGTGGGAGAT	32	Neoblast: 0
Cells_Trunk_AGGTCCTTTCAT	2	Epidermal: 2
Cells_Trunk_GTTCTTAGTATG	31	Intestine: 6
Cells_Trunk_AGCGAGACAATN	17	Cathepsin+ cells: 15
Cells_Trunk_TGAAGCTATAGG	14	Neoblast: 0
Cells_Trunk_TGGCCTCTCTCA	12	Intestine: 6
Cells_Trunk_GTAATGCGCCGT	1	Epidermal: 3
Cells_Trunk_CATTCGCATTGN	5	Epidermal: 3
Cells_Trunk_AGTAGTGCGCAC	1	Epidermal: 3
Cells_Trunk_ATAACAGTCAGT	4	Neoblast: 0
Cells_Trunk_CAAGCCAGAGGA	12	Intestine: 6
Cells_Trunk_CCAAAACGTGAG	17	Cathepsin+ cells: 15
Cells_Trunk_GAGCTTACACAC	5	Epidermal: 3
Cells_Trunk_ATTACCTGAGGG	18	Cathepsin+ cells: 4
Cells_Trunk_CCATGCTCGTGN	17	Cathepsin+ cells: 4
Cells_Trunk_GCAGACCTCTCG	4	Neoblast: 0
Cells_Trunk_AGATTCGTGCCA	45	Cathepsin+ cells: 28
Cells_Trunk_ACCCGAACGCCT	1	Epidermal: 2
Cells_Trunk_ATTTATCGCAGN	0	Neoblast: 0
Cells_Trunk_ATAACCAAGGGA	1	Epidermal: 2
Cells_Trunk_GGACCTTACTTG	5	Epidermal: 3
Cells_Trunk_GATACAGACAGC	27	Intestine: 19
Cells_Trunk_GTTTGTTTGTCA	24	Neoblast: 22
Cells_Trunk_ACCCAGTGAACN	1	Epidermal: 2
Cells_Trunk_ACCGTACGGTAG	0	Neoblast: 0
Cells_Trunk_GCCGACGCAGCC	3	Neural: 1
Cells_Trunk_CCTCGCTCTAAT	1	Epidermal: 2
Cells_Trunk_CTGCTGGGAGAG	2	Epidermal: 2
Cells_Trunk_GTTAAATTATGG	1	Epidermal: 2
Cells_Trunk_ATCCTAGAATGC	52	Epidermal: 35
Cells_Trunk_GAACTACTTTGC	5	Epidermal: 3
Cells_Trunk_AGTGAAGAGTTG	20	Cathepsin+ cells: 4
Cells_Trunk_ACTCAACGATGN	2	Epidermal: 2
Cells_Trunk_GTCATGCGACAA	30	Epidermal: 3
Cells_Trunk_CGGGCCCTCAGT	0	Neoblast: 0
Cells_Trunk_TCCGCAGATCGN	2	Epidermal: 2
Cells_Trunk_GTAAGATCCCTA	15	Cathepsin+ cells: 4
Cells_Trunk_CGAAACGCTACC	1	Epidermal: 3
Cells_Trunk_ACCGATTTGCCN	17	Cathepsin+ cells: 15
Cells_Trunk_GTGCCGTGGTGT	24	Neoblast: 22
Cells_Trunk_TGACTCTCTCTT	13	Epidermal: 11
Cells_Trunk_TAGCGGCCTCGA	6	Neural: 1
Cells_Trunk_GGACCATCATCA	12	Intestine: 6
Cells_Trunk_ATGCTCCAAACT	5	Epidermal: 3
Cells_Trunk_AATTGTGATACT	29	Pharynx: 25
Cells_Trunk_CGTACTAACGCC	29	Pharynx: 25
Cells_Trunk_ACCCGCCCAGGA	18	Cathepsin+ cells: 4
Cells_Trunk_ACTAGTCAGGGG	13	Epidermal: 11
Cells_Trunk_CAGGCGAATACG	2	Epidermal: 2
Cells_Trunk_CACTCTCGACCC	1	Epidermal: 3
Cells_Trunk_TAAAAGACTTCA	2	Epidermal: 2
Cells_Trunk_TAACGATTGCCG	14	Neoblast: 0
Cells_Trunk_GTTTGTTGTCAN	24	Neoblast: 22
Cells_Trunk_GCCCTCGCCCAA	5	Epidermal: 3
Cells_Trunk_ATTTATCTGTCA	1	Epidermal: 2
Cells_Trunk_TTTCGAATAATT	5	Epidermal: 2
Cells_Trunk_AAACACGTTTCA	1	Epidermal: 3
Cells_Trunk_GGCGCCCCTCGT	1	Epidermal: 2
Cells_Trunk_GGCAACCTGCTT	12	Intestine: 6
Cells_Trunk_TGTAAGTCACTA	16	Muscle: 7
Cells_Trunk_TACCCTTGCGCN	1	Epidermal: 2
Cells_Trunk_GATCTCCCGAGA	1	Epidermal: 2
Cells_Trunk_ACCGCGCATGCC	20	Cathepsin+ cells: 4
Cells_Trunk_GCACCAATTGCT	0	Neoblast: 0
Cells_Trunk_GATGTCCCCGGN	13	Epidermal: 11
Cells_Trunk_GACCGCAAGTTC	14	Neoblast: 0
Cells_Trunk_CTGTATTGACCG	56	Neural: 8
Cells_Trunk_TAAACATGTTAA	15	Cathepsin+ cells: 4
Cells_Trunk_GTGTCACACCCC	13	Epidermal: 11
Cells_Trunk_ATCCTTAAAGGG	25	Cathepsin+ cells: 17
Cells_Trunk_TGATCTCTACCT	0	Neoblast: 0
Cells_Trunk_CGACAGTTGCCC	21	Muscle: 7
Cells_Trunk_CTGGTGCTTAGC	0	Neoblast: 0
Cells_Trunk_CCATGTAGGCAA	0	Neoblast: 0
Cells_Trunk_GTGCACGTTTTG	29	Pharynx: 25
Cells_Trunk_CCTAGCACAAAG	42	Pharynx: 25
Cells_Trunk_GCGGACCCCCGT	4	Neoblast: 0
Cells_Trunk_GGTTCTCGCCCC	0	Neoblast: 0
Cells_Trunk_AGCCCGCTCCAG	12	Intestine: 6
Cells_Trunk_CGTTCTGACTGT	2	Epidermal: 2
Cells_Trunk_GAAAATGGAGAC	29	Pharynx: 25
Cells_Trunk_CTAGCTGGAATG	17	Cathepsin+ cells: 15
Cells_Trunk_AAAGTGCCGATA	17	Cathepsin+ cells: 15
Cells_Trunk_AGAGATGTTCAA	4	Neural: 1
Cells_Trunk_GTTAAGAACCAA	22	Cathepsin+ cells: 28
Cells_Trunk_AATAGCGTTATT	31	Intestine: 6
Cells_Trunk_GTGGAGTATGTA	30	Epidermal: 3
Cells_Trunk_GCAATCCCTACN	0	Neoblast: 0
Cells_Trunk_TTTAAATACTGA	18	Cathepsin+ cells: 4
Cells_Trunk_ACCGAAGACCTA	20	Cathepsin+ cells: 4
Cells_Trunk_CAGATAGTGAAA	5	Epidermal: 3
Cells_Trunk_GCAACGGCTTTG	28	Muscle: 16
Cells_Trunk_GATGTTAGCTAT	31	Intestine: 6
Cells_Trunk_TCTCATAGTAAC	12	Intestine: 6
Cells_Trunk_GGAAAGGTTCCC	1	Epidermal: 3
Cells_Trunk_CTATCTCTTGGT	18	Cathepsin+ cells: 10
Cells_Trunk_TGACCAGAGAGT	0	Neoblast: 0
Cells_Trunk_ACAGCTGAACAT	31	Intestine: 6
Cells_Trunk_TGATGTCCAAAG	20	Cathepsin+ cells: 4
Cells_Trunk_AACTCCAATCCC	52	Epidermal: 24
Cells_Trunk_TAGTAAGTCGCT	18	Cathepsin+ cells: 4
Cells_Trunk_GTTATAATTTTN	4	Neoblast: 0
Cells_Trunk_AGAGGTCACCAN	0	Neoblast: 0
Cells_Trunk_ACTTCCCCCGGN	18	Cathepsin+ cells: 10
Cells_Trunk_TTTAGAACCACT	17	Cathepsin+ cells: 15
Cells_Trunk_CACGAAAACGTG	15	Cathepsin+ cells: 4
Cells_Trunk_CCTAGCGGCTTN	0	Neoblast: 0
Cells_Trunk_CCGCCGGAAGTA	34	Parapharyngeal: 12
Cells_Trunk_GTACTGACCTCC	7	Neoblast: 0
Cells_Trunk_CACGGCTGCCAC	11	Epidermal: 2
Cells_Trunk_TACGATACATAT	30	Epidermal: 3
Cells_Trunk_GTCTCTAGTGGT	4	Neoblast: 0
Cells_Trunk_CTAAACAAATCC	30	Epidermal: 3
Cells_Trunk_GCAGATGGGTCG	2	Epidermal: 2
Cells_Trunk_CAAATATGGACT	0	Neoblast: 0
Cells_Trunk_TGGCCAAATCTC	11	Epidermal: 2
Cells_Trunk_CTAGTATTCTAC	15	Cathepsin+ cells: 4
Cells_Trunk_CATCTTCAGTGT	32	Parapharyngeal: 12
Cells_Trunk_CCACAGGGTTCC	4	Neoblast: 0
Cells_Trunk_CCGATCCCTATA	1	Epidermal: 2
Cells_Trunk_TTTAGCAGCTTT	1	Epidermal: 3
Cells_Trunk_TCCGCCTTATCT	15	Neural: 1
Cells_Trunk_GGGTACGAACTG	29	Pharynx: 25
Cells_Trunk_ATGTCGATTACC	55	Neural: 8
Cells_Trunk_AACAACAAAACT	30	Epidermal: 3
Cells_Trunk_TAGCACACCACA	2	Epidermal: 2
Cells_Trunk_TGAGTCGGGCTC	2	Epidermal: 2
Cells_Trunk_CAACAGCATCGT	35	Epidermal: 24
Cells_Trunk_GCTTATTAGGCA	18	Cathepsin+ cells: 4
Cells_Trunk_GCGCTCACCGAT	17	Cathepsin+ cells: 15
Cells_Trunk_AACGCTGAGACN	2	Epidermal: 2
Cells_Trunk_TACCGACAGTCA	22	Cathepsin+ cells: 10
Cells_Trunk_TACTTCATGGTA	52	Epidermal: 35
Cells_Trunk_GACACCCCTACC	11	Epidermal: 2
Cells_Trunk_TCACCGACATCA	21	Muscle: 7
Cells_Trunk_ATTATGGCAAAA	4	Neoblast: 0
Cells_Trunk_GTTTTGGCCTTC	15	Cathepsin+ cells: 4
Cells_Trunk_ACTGGGAAGAAT	1	Epidermal: 3
Cells_Trunk_CGCCTCATTGTC	11	Epidermal: 2
Cells_Trunk_GCCCAGAGCGGC	12	Intestine: 6
Cells_Trunk_AATGATCGGCCA	14	Neoblast: 0
Cells_Trunk_CAAGTATGCTCT	2	Epidermal: 2
Cells_Trunk_AGGAAAGGACCG	5	Epidermal: 3
Cells_Trunk_CAGCGCACTTTG	27	Parapharyngeal: 12
Cells_Trunk_TGAAATTACAGN	17	Cathepsin+ cells: 15
Cells_Trunk_ATGCCCGCTCGG	15	Epidermal: 3
Cells_Trunk_GCTCTTACGCCA	16	Muscle: 7
Cells_Trunk_TGACGTTTGATG	20	Cathepsin+ cells: 4
Cells_Trunk_TTTGGCGTCCAG	18	Cathepsin+ cells: 10
Cells_Trunk_TACGTTATATGG	4	Neoblast: 0
Cells_Trunk_CGTGCTGTCTCN	45	Cathepsin+ cells: 28
Cells_Trunk_GGTCGTGGAGAG	30	Neoblast: 0
Cells_Trunk_GTATGCCTAACT	0	Neoblast: 0
Cells_Trunk_CATATACGTTGA	20	Cathepsin+ cells: 4
Cells_Trunk_CTCCGCCAGGTN	52	Epidermal: 35
Cells_Trunk_TGTTCGGGGTAT	15	Cathepsin+ cells: 4
Cells_Trunk_CCAGCCCCGTCC	1	Epidermal: 2
Cells_Trunk_TACCACTAGCGC	4	Neoblast: 0
Cells_Trunk_GGTTTAAAGTAT	5	Epidermal: 3
Cells_Trunk_GCCTTACCAAAA	13	Epidermal: 11
Cells_Trunk_GTGAGAGTACGT	2	Epidermal: 2
Cells_Trunk_CCGCTGACATAT	1	Epidermal: 3
Cells_Trunk_CAATTGCCGGCC	25	Cathepsin+ cells: 17
Cells_Trunk_GTTGTAGCAATC	25	Cathepsin+ cells: 17
Cells_Trunk_GTTCCGTGCCTC	21	Muscle: 7
Cells_Trunk_TCAATGCTCCGA	30	Cathepsin+ cells: 4
Cells_Trunk_TTGTGGACTGCA	31	Intestine: 6
Cells_Trunk_GCAAAGAATGCA	24	Intestine: 6
Cells_Trunk_CTCTTCTGTTGA	12	Intestine: 6
Cells_Trunk_TCTCGACCCGCC	34	Parapharyngeal: 12
Cells_Trunk_CCGAGTATACAA	12	Intestine: 6
Cells_Trunk_GGGACGCGCATC	30	Epidermal: 3
Cells_Trunk_AAGCGGTGCTAA	4	Neoblast: 0
Cells_Trunk_ACAGAATCCTAG	27	Intestine: 19
Cells_Trunk_AGCGGAGCCACG	1	Epidermal: 2
Cells_Trunk_TCAGAAGGAACA	49	Neural: 36
Cells_Trunk_GAAGGACTGCGT	4	Neoblast: 0
Cells_Trunk_ATCATAGCTTAN	52	Epidermal: 35
Cells_Trunk_GCTATCAGAGTG	12	Intestine: 6
Cells_Trunk_CGTTGTTTAGTC	1	Epidermal: 2
Cells_Trunk_GAGAACGGGTAT	4	Neoblast: 0
Cells_Trunk_TTCCTAAACTGA	16	Muscle: 7
Cells_Trunk_TCTCGGACACTT	17	Cathepsin+ cells: 4
Cells_Trunk_CATAAGATCCTT	25	Cathepsin+ cells: 17
Cells_Trunk_CCACAGAAATGN	16	Muscle: 7
Cells_Trunk_TCTTTGATGGCT	18	Cathepsin+ cells: 4
Cells_Trunk_GAATTCACACTC	20	Cathepsin+ cells: 4
Cells_Trunk_CGCACCTTTATC	13	Epidermal: 11
Cells_Trunk_AGATCGTGCCAN	45	Cathepsin+ cells: 28
Cells_Trunk_ATAGCCCGCATG	15	Cathepsin+ cells: 4
Cells_Trunk_GAAGGTCTAAGC	25	Cathepsin+ cells: 17
Cells_Trunk_TACATCCCGAGA	4	Neoblast: 0
Cells_Trunk_CACCCCAGTCTG	2	Epidermal: 2
Cells_Trunk_TTACCAAACTCN	4	Neoblast: 0
Cells_Trunk_GCGAGCCGGATA	11	Epidermal: 2
Cells_Trunk_AGTATGAATCCN	1	Epidermal: 3
Cells_Trunk_TAGGTTCGACCC	18	Cathepsin+ cells: 4
Cells_Trunk_ATGAAAATTTAT	20	Cathepsin+ cells: 4
Cells_Trunk_TGCGATATAAGA	0	Neoblast: 0
Cells_Trunk_CAGACTTAAACA	31	Intestine: 6
Cells_Trunk_CCTCCGAGCCGN	4	Neoblast: 0
Cells_Trunk_TGATTGGACTCN	13	Epidermal: 11
Cells_Trunk_TCACCTCAAGAA	52	Epidermal: 35
Cells_Trunk_TAGCGATCGACT	15	Cathepsin+ cells: 4
Cells_Trunk_ACGTCATATCTN	15	Cathepsin+ cells: 4
Cells_Trunk_CATGTCCGACGC	4	Neoblast: 0
Cells_Trunk_TCTACCGTCAAC	1	Epidermal: 2
Cells_Trunk_CCTAAAGCATTG	32	Neural: 1
Cells_Trunk_TACGATAGATAG	1	Epidermal: 2
Cells_Trunk_GGTCCTTTACTT	4	Neoblast: 0
Cells_Trunk_CTTAATCATTCC	17	Cathepsin+ cells: 15
Cells_Trunk_AGATCTAGCTCA	12	Intestine: 6
Cells_Trunk_AAATGCAAGCAN	31	Intestine: 6
Cells_Trunk_CCTGCCCACGTC	15	Cathepsin+ cells: 4
Cells_Trunk_ATTAGTAAGCTC	1	Epidermal: 3
Cells_Trunk_CCCTAGTTAAAC	2	Epidermal: 2
Cells_Trunk_GCCACGATCTAG	1	Epidermal: 2
Cells_Trunk_CAAGGGACCCAG	1	Epidermal: 3
Cells_Trunk_ACGCGGAGACCT	32	Neoblast: 0
Cells_Trunk_TTCGGATTGTCA	12	Intestine: 6
Cells_Trunk_TAGCAAGTAGAT	30	Neoblast: 0
Cells_Trunk_ATCCACGGAACG	5	Epidermal: 2
Cells_Trunk_AACTTTGGCCAG	1	Epidermal: 3
Cells_Trunk_GGGTAAAGCACA	15	Cathepsin+ cells: 4
Cells_Trunk_TCTAGCACGTAC	4	Neoblast: 0
Cells_Trunk_AGATCAGAAGCA	15	Cathepsin+ cells: 4
Cells_Trunk_GCCGTCAATGCC	15	Cathepsin+ cells: 4
Cells_Trunk_GTCTCAACCGCG	1	Epidermal: 2
Cells_Trunk_CCGATTACGCTG	16	Muscle: 7
Cells_Trunk_ATAATATACCGN	2	Epidermal: 2
Cells_Trunk_ACCAAGCTCTAA	30	Epidermal: 3
Cells_Trunk_GTGACTAGATTG	1	Epidermal: 2
Cells_Trunk_CACCCTGGCTAA	13	Epidermal: 24
Cells_Trunk_GAACCTAAATGT	16	Muscle: 7
Cells_Trunk_AGTCAGGAGCTN	5	Epidermal: 3
Cells_Trunk_CCTAGCGTGTTC	29	Pharynx: 25
Cells_Trunk_CTTTCCCCATGC	18	Cathepsin+ cells: 4
Cells_Trunk_ATTAGATCCTCN	18	Cathepsin+ cells: 4
Cells_Trunk_TTCGGCGCTACC	20	Cathepsin+ cells: 4
Cells_Trunk_CAGGTCTGAGGT	65	Neural: 8
Cells_Trunk_CTTAAATGTTCC	4	Neoblast: 0
Cells_Trunk_CCCACTCGACGG	2	Epidermal: 2
Cells_Trunk_CGTGAGCCGTTC	31	Intestine: 6
Cells_Trunk_ATGACAACCTCT	9	Neural: 8
Cells_Trunk_GTTCAAGTGACA	21	Protonephridia: 40
Cells_Trunk_GCGCGAACAAAC	4	Neoblast: 0
Cells_Trunk_CTTGTCCAACTN	30	Epidermal: 3
Cells_Trunk_ATACGGGCTAGA	31	Intestine: 6
Cells_Trunk_CTATTTGACAAN	4	Neoblast: 0
Cells_Trunk_CTACTAGTCCAA	1	Epidermal: 2
Cells_Trunk_TTTTTGCGCTGC	1	Epidermal: 3
Cells_Trunk_GCAGGACCAGCG	29	Pharynx: 25
Cells_Trunk_AAATCAACGACC	16	Muscle: 7
Cells_Trunk_GCGTGCTTCATT	52	Epidermal: 35
Cells_Trunk_ACTTAAACAATN	4	Neoblast: 0
Cells_Trunk_GTGGACAGCGTG	11	Epidermal: 2
Cells_Trunk_GACACGCAATCN	4	Neoblast: 0
Cells_Trunk_ACTCAAGCTCAT	32	Neural: 1
Cells_Trunk_CCTTTAGTACGG	24	Neoblast: 0
Cells_Trunk_TCGAATCCCCCC	39	Epidermal: 2
Cells_Trunk_TTCTGTGCCCAC	30	Epidermal: 3
Cells_Trunk_CGAGTAAAGCGN	4	Neoblast: 0
Cells_Trunk_GGTTGCGCCCGC	45	Cathepsin+ cells: 28
Cells_Trunk_AGAGCTATTTCA	15	Cathepsin+ cells: 4
Cells_Trunk_TGAGGTGGTTAC	1	Epidermal: 2
Cells_Trunk_TAGTTTAGAGTN	33	Neural: 18
Cells_Trunk_AACCTCTCTCGT	42	Pharynx: 25
Cells_Trunk_TGCGCATCGAGN	55	Neural: 8
Cells_Trunk_AATACAATGATG	15	Cathepsin+ cells: 4
Cells_Trunk_AGCATCCTATGN	42	Intestine: 19
Cells_Trunk_ATTCCCCCGAGG	12	Intestine: 6
Cells_Trunk_AAACCTTCGCTT	46	Parapharyngeal: 12
Cells_Trunk_CCAGGATAGAAC	20	Cathepsin+ cells: 4
Cells_Trunk_ACGTCGATGATG	1	Epidermal: 3
Cells_Trunk_AAATGAGAGATG	25	Cathepsin+ cells: 17
Cells_Trunk_CGCCCTTGATCA	20	Cathepsin+ cells: 4
Cells_Trunk_CACACCGAGGAT	16	Muscle: 7
Cells_Trunk_GCGCACCTACCC	13	Epidermal: 11
Cells_Trunk_AAATCGAGTGTT	3	Neural: 1
Cells_Trunk_AGGCGTTCTGTA	5	Epidermal: 3
Cells_Trunk_GCAACAGGATTN	2	Epidermal: 2
Cells_Trunk_AAAGCAGAGGAG	1	Epidermal: 3
Cells_Trunk_AGGTGCGCTAAC	16	Muscle: 7
Cells_Trunk_TCAACTAATAAT	20	Cathepsin+ cells: 4
Cells_Trunk_GCCTCCGCATCA	2	Epidermal: 2
Cells_Trunk_CTCTCGGTGTCA	40	Parapharyngeal: 12
Cells_Trunk_CGCTACGTGGGA	4	Neoblast: 0
Cells_Trunk_TATATATATCTC	20	Cathepsin+ cells: 4
Cells_Trunk_CATGAGACATGG	45	Cathepsin+ cells: 28
Cells_Trunk_GTCCAGAGTAAA	46	Parapharyngeal: 12
Cells_Trunk_GTTTGCCCCCAT	26	Muscle: 14
Cells_Trunk_GCCACAGGCCTC	34	Parapharyngeal: 12
Cells_Trunk_GCACTCACTTAN	22	Cathepsin+ cells: 10
Cells_Trunk_CATCGGCTCTCC	31	Intestine: 6
Cells_Trunk_CTCGGAGGCCAA	1	Epidermal: 2
Cells_Trunk_TCGCGATCGTAT	11	Epidermal: 2
Cells_Trunk_CAGATTCTCTAT	6	Neural: 1
Cells_Trunk_ATTGGTGTAGAC	7	Neoblast: 0
Cells_Trunk_TGTCTAACTACT	16	Neoblast: 0
Cells_Trunk_GAAGATGTTCGG	12	Intestine: 6
Cells_Trunk_TCAAACGGTATA	1	Epidermal: 2
Cells_Trunk_GCAGGCAGGCAC	46	Cathepsin+ cells: 4
Cells_Trunk_TTCGTCGAGGCT	5	Epidermal: 3
Cells_Trunk_AGCGCAGCGAGC	5	Epidermal: 3
Cells_Trunk_TTTTGATCGTCG	17	Cathepsin+ cells: 15
Cells_Trunk_CCGTGATCGAAA	11	Epidermal: 2
Cells_Trunk_ATGACCCCCTTT	34	Parapharyngeal: 12
Cells_Trunk_GTTGTTTAAACG	43	Parapharyngeal: 12
Cells_Trunk_ATTCCCTGATTC	21	Muscle: 7
Cells_Trunk_CTGCCCGATCTT	7	Cathepsin+ cells: 4
Cells_Trunk_GCCTGTTAGGCT	1	Epidermal: 2
Cells_Trunk_CCTGATGGTGAT	12	Intestine: 6
Cells_Trunk_TGCAAACTAATA	5	Epidermal: 3
Cells_Trunk_CTGTGCCCCGCT	16	Muscle: 7
Cells_Trunk_GCTCCAAACTAG	25	Cathepsin+ cells: 17
Cells_Trunk_AACGTGCATACT	5	Epidermal: 3
Cells_Trunk_ATAAAGTCCTTA	3	Neural: 1
Cells_Trunk_TCGGTCGCAAAG	2	Epidermal: 2
Cells_Trunk_TTTGAAGGAGAC	15	Cathepsin+ cells: 4
Cells_Trunk_CGCGCAGCCGCG	15	Cathepsin+ cells: 4
Cells_Trunk_ATTTCTGACTCT	13	Epidermal: 24
Cells_Trunk_CTGGCACCAACG	5	Epidermal: 3
Cells_Trunk_GTCGCAGAGATA	32	Cathepsin+ cells: 4
Cells_Trunk_GAAAGGAGAGGN	12	Intestine: 6
Cells_Trunk_ATTCGCGGCGTC	25	Cathepsin+ cells: 17
Cells_Trunk_AGGGCCTTTGGA	21	Muscle: 7
Cells_Trunk_TAGGCTTTTAAG	45	Cathepsin+ cells: 4
Cells_Trunk_TTCCACCGACGT	5	Epidermal: 3
Cells_Trunk_GTCGGCGAATCC	20	Cathepsin+ cells: 4
Cells_Trunk_CTATTTGCACAA	4	Neoblast: 0
Cells_Trunk_TACCTACCAAAA	20	Cathepsin+ cells: 4
Cells_Trunk_AGTTGAGGGTTT	33	Neural: 18
Cells_Trunk_GTTGTACATGTT	17	Cathepsin+ cells: 15
Cells_Trunk_AGCTAGCCCCAG	4	Muscle: 7
Cells_Trunk_ATGTTGCTACGC	17	Cathepsin+ cells: 15
Cells_Trunk_CCGATGGCCGCT	2	Epidermal: 2
Cells_Trunk_TCTTCGACCCCC	15	Cathepsin+ cells: 4
Cells_Trunk_TGAAGCACTAGG	2	Epidermal: 2
Cells_Trunk_ACGAAGAGAGGA	15	Cathepsin+ cells: 4
Cells_Trunk_GTTATACCGACG	18	Cathepsin+ cells: 10
Cells_Trunk_CCCTGTTTCTTC	43	Parapharyngeal: 12
Cells_Trunk_GGAATGACCTGG	14	Neoblast: 0
Cells_Trunk_AGAACCCCCGCA	14	Epidermal: 3
Cells_Trunk_TATAATTCCAGG	6	Neural: 1
Cells_Trunk_GTCGAGTAACGT	4	Neoblast: 0
Cells_Trunk_AAGCGGGCGATC	18	Cathepsin+ cells: 10
Cells_Trunk_GCATTAGTCCCA	7	Neural: 1
Cells_Trunk_AGTTGGATGAAA	20	Cathepsin+ cells: 4
Cells_Trunk_TTTACAATTGGT	3	Neural: 1
Cells_Trunk_GACATTGGTTAG	5	Epidermal: 3
Cells_Trunk_TTTAGCAGTACC	31	Intestine: 6
Cells_Trunk_GTGCCATTCCGG	27	Intestine: 19
Cells_Trunk_TGTCTGTGGTCN	24	Intestine: 6
Cells_Trunk_GCGCAACGACTA	29	Pharynx: 25
Cells_Trunk_CGCCCTGTAGTC	20	Cathepsin+ cells: 4
Cells_Trunk_TAGTACACGCCA	12	Intestine: 6
Cells_Trunk_AGGCAAGCTCGT	1	Epidermal: 3
Cells_Trunk_TCGCCACAATTT	30	Pharynx: 25
Cells_Trunk_ACGCCAACCAAC	29	Pharynx: 25
Cells_Trunk_GATGTAAGAGAC	6	Neural: 1
Cells_Trunk_ATTTTTGGGCTA	14	Neoblast: 0
Cells_Trunk_GTGAATTGGCGT	1	Epidermal: 2
Cells_Trunk_GTGCAGCATTGC	20	Cathepsin+ cells: 4
Cells_Trunk_ATGCCCGCACTG	4	Neoblast: 0
Cells_Trunk_GCTTTGCTTTGC	14	Neoblast: 0
Cells_Trunk_CCGAGAAGCGGC	20	Cathepsin+ cells: 4
Cells_Trunk_GAGTCTATGGCT	5	Epidermal: 3
Cells_Trunk_TTCCCGCATATN	19	Neural: 20
Cells_Trunk_TAGCAATAACTC	15	Cathepsin+ cells: 4
Cells_Trunk_ACCGATCAATCG	31	Intestine: 6
Cells_Trunk_GAGCACCCGGCC	18	Cathepsin+ cells: 4
Cells_Trunk_CGTTGGATCCGG	10	Neural: 8
Cells_Trunk_CGCAAATGGACC	5	Epidermal: 3
Cells_Trunk_GCTACCTTGACC	32	Parapharyngeal: 12
Cells_Trunk_CGGGGCGCCTCT	1	Epidermal: 3
Cells_Trunk_GCCAGTTCGCTA	7	Muscle: 7
Cells_Trunk_GAGCCGGTTTGN	2	Epidermal: 2
Cells_Trunk_AGAGAATTCCCA	1	Epidermal: 3
Cells_Trunk_CCCTCCGGTTTC	54	Parapharyngeal: 12
Cells_Trunk_CTAAGCGGGGGA	4	Neoblast: 0
Cells_Trunk_CTACAGTTGTCC	5	Epidermal: 3
Cells_Trunk_GCTAGTGTTTTC	29	Pharynx: 25
Cells_Trunk_AGTGTGAATTGC	5	Epidermal: 3
Cells_Trunk_CGAACGAATGTT	15	Cathepsin+ cells: 4
Cells_Trunk_AATTCGCTGAGA	13	Epidermal: 24
Cells_Trunk_CGCCGAGGCTGC	25	Cathepsin+ cells: 17
Cells_Trunk_AACATAGCAGTG	16	Muscle: 7
Cells_Trunk_GGCTATCCACGG	1	Epidermal: 2
Cells_Trunk_AATGCATGAACT	16	Muscle: 7
Cells_Trunk_TCGGTTGCATAC	32	Parapharyngeal: 12
Cells_Trunk_TATTTTTCTATC	45	Cathepsin+ cells: 28
Cells_Trunk_GCTCACATGCGG	31	Intestine: 6
Cells_Trunk_GGTTTCTCCCAC	4	Neoblast: 5
Cells_Trunk_GCATGTAAGATC	18	Cathepsin+ cells: 4
Cells_Trunk_TCTATGTTGAAC	15	Cathepsin+ cells: 4
Cells_Trunk_TGGCTTGTTTAT	11	Epidermal: 2
Cells_Trunk_AAACGCCAACTC	31	Intestine: 6
Cells_Trunk_ACCACCCGCTAA	0	Neoblast: 0
Cells_Trunk_TGACGGTCGTGN	2	Epidermal: 2
Cells_Trunk_CTATTGCCCCAA	5	Epidermal: 3
Cells_Trunk_CCCAGGACCAGC	15	Cathepsin+ cells: 4
Cells_Trunk_CCTAGGCTTGGT	17	Cathepsin+ cells: 15
Cells_Trunk_AGTCTGACCGTT	2	Epidermal: 2
Cells_Trunk_TAGAGTGACGTN	0	Neoblast: 0
Cells_Trunk_TGCCCTGGCTAT	43	Parapharyngeal: 12
Cells_Trunk_CTTGGTTCGCCG	18	Cathepsin+ cells: 4
Cells_Trunk_ATCCACAACCAG	20	Cathepsin+ cells: 4
Cells_Trunk_CTTTCCCCGCCT	16	Muscle: 7
Cells_Trunk_GTGTATTCAACG	6	Neural: 1
Cells_Trunk_TGATACCAATAG	15	Cathepsin+ cells: 4
Cells_Trunk_AAAAGAAGCCAC	5	Epidermal: 3
Cells_Trunk_TAGCCAGTTAAA	5	Epidermal: 3
Cells_Trunk_TGGCGCATAATT	24	Neoblast: 22
Cells_Trunk_GAAATCCGCTCN	24	Neoblast: 0
Cells_Trunk_TAGCGGGAGTGT	12	Intestine: 6
Cells_Trunk_TACAGGGACGCC	20	Cathepsin+ cells: 4
Cells_Trunk_GTTAGCAAAATG	11	Epidermal: 2
Cells_Trunk_TTGCAACTGACG	1	Epidermal: 3
Cells_Trunk_AAAGATGGCTTC	4	Neoblast: 5
Cells_Trunk_ATACCATGCCTN	22	Cathepsin+ cells: 10
Cells_Trunk_ATTCGACGTGTA	52	Epidermal: 35
Cells_Trunk_CATCGACAGAAT	7	Neoblast: 0
Cells_Trunk_AGGAGCTATTCA	4	Neoblast: 0
Cells_Trunk_AGCGCCGTGTTG	16	Muscle: 7
Cells_Trunk_ATTGGGGAACGG	2	Epidermal: 2
Cells_Trunk_CTACGAATGGTA	5	Epidermal: 3
Cells_Trunk_TCAGGAGACTAA	1	Epidermal: 2
Cells_Trunk_TGGCCACGCCCT	2	Epidermal: 2
Cells_Trunk_CAGTCTATTCAA	30	Epidermal: 3
Cells_Trunk_TAGCGACCCGTG	29	Pharynx: 25
Cells_Trunk_GAGAATTGCAAG	7	Neoblast: 0
Cells_Trunk_GAGCATGTCGAG	33	Neural: 1
Cells_Trunk_GTCCCTAGGGGC	31	Intestine: 6
Cells_Trunk_GTTCGGTTCATT	30	Epidermal: 3
Cells_Trunk_TAATTATGTCAG	1	Epidermal: 3
Cells_Trunk_GCGAGCGGTAAN	5	Epidermal: 3
Cells_Trunk_TGTGACAAAGAT	16	Muscle: 7
Cells_Trunk_GTCCCGCCGAAN	30	Epidermal: 3
Cells_Trunk_CTTAAGTCGCAA	20	Cathepsin+ cells: 4
Cells_Trunk_GCTTTGATGCCG	4	Neoblast: 0
Cells_Trunk_CTTACCGAATTG	17	Cathepsin+ cells: 15
Cells_Trunk_GTATAAGCGAAC	40	Parapharyngeal: 12
Cells_Trunk_TACCACCAAGAN	15	Cathepsin+ cells: 4
Cells_Trunk_ACAGTCTGGAAT	16	Muscle: 7
Cells_Trunk_ACCAAAGCACAA	24	Neoblast: 5
Cells_Trunk_AATATTCTACAG	15	Cathepsin+ cells: 4
Cells_Trunk_GCTAGTGGCATT	5	Epidermal: 3
Cells_Trunk_TAGCGTCGACTN	15	Neoblast: 5
Cells_Trunk_AGTTAAATACAT	40	Parapharyngeal: 38
Cells_Trunk_CCGATACAGACC	17	Cathepsin+ cells: 15
Cells_Trunk_TATTACTGTTTT	15	Cathepsin+ cells: 4
Cells_Trunk_TGTCGCGGCGTN	36	Protonephridia: 26
Cells_Trunk_TAACGATAGCAC	12	Intestine: 6
Cells_Trunk_TGACATAGGTCG	6	Neural: 1
Cells_Trunk_AGTTCTCCCTTT	3	Neural: 8
Cells_Trunk_CGAAACTAAAGN	3	Neural: 1
Cells_Trunk_GCTGATCCCGAA	2	Epidermal: 2
Cells_Trunk_CCATCTGTATTN	4	Neural: 1
Cells_Trunk_TGACACGCAGCN	4	Neoblast: 5
Cells_Trunk_ATCTGCTCCGTA	1	Epidermal: 2
Cells_Trunk_ATGATGACTATG	7	Cathepsin+ cells: 4
Cells_Trunk_TGTTCGGAAAAC	15	Cathepsin+ cells: 4
Cells_Trunk_TACTTTCGCCGT	46	Parapharyngeal: 12
Cells_Trunk_AACGTTCCCTAA	7	Neoblast: 5
Cells_Trunk_GGGGCAACTTGT	1	Epidermal: 3
Cells_Trunk_GGACAACTTCGG	14	Epidermal: 3
Cells_Trunk_TCCATACTGGCG	1	Epidermal: 2
Cells_Trunk_TCCAATCCGGCT	1	Epidermal: 3
Cells_Trunk_CAGGGAGAAGAG	1	Epidermal: 3
Cells_Trunk_GAAAACCCGACC	15	Cathepsin+ cells: 4
Cells_Trunk_GGCCAGACTCTC	15	Cathepsin+ cells: 4
Cells_Trunk_CGAGATGGGATG	2	Epidermal: 2
Cells_Trunk_AGGGTTTTGTCA	15	Cathepsin+ cells: 4
Cells_Trunk_GCAGCTGTAACG	1	Epidermal: 3
Cells_Trunk_GTTTGTCAAGTG	4	Neoblast: 0
Cells_Trunk_AGACACACCGGC	29	Pharynx: 25
Cells_Trunk_GGTAGCCCTTAC	4	Neoblast: 0
Cells_Trunk_CTGCAGTCCTTC	5	Epidermal: 3
Cells_Trunk_TTGGGAGTCTGN	2	Epidermal: 2
Cells_Trunk_AGTATAGCGATG	1	Epidermal: 2
Cells_Trunk_AACATGCCTTCA	6	Neural: 1
Cells_Trunk_TATGAAGCCACC	16	Muscle: 7
Cells_Trunk_ATGTGTTCCACA	2	Epidermal: 2
Cells_Trunk_ATCATGGTAGAC	17	Cathepsin+ cells: 15
Cells_Trunk_TCCCTCCAAATG	20	Cathepsin+ cells: 4
Cells_Trunk_ATCTTATACTAC	5	Epidermal: 3
Cells_Trunk_GTTAAAGGGCTA	5	Epidermal: 3
Cells_Trunk_CTTCACCGTCAT	5	Epidermal: 3
Cells_Trunk_CTTGCATGCGCG	1	Epidermal: 3
Cells_Trunk_CAACCCGTCTCC	21	Muscle: 7
Cells_Trunk_CCCGCGGTGAAT	52	Epidermal: 35
Cells_Trunk_TGCAAGGAGCCG	14	Neoblast: 0
Cells_Trunk_TGTTTTGCTGGA	5	Epidermal: 3
Cells_Trunk_GACTTTCTGCTG	25	Cathepsin+ cells: 17
Cells_Trunk_GGCTCAACTCAT	42	Intestine: 30
Cells_Trunk_ACGCGACAGATG	12	Intestine: 6
Cells_Trunk_ATCTTAAGTTTT	16	Muscle: 7
Cells_Trunk_GAACCGCCTTCC	40	Parapharyngeal: 12
Cells_Trunk_GAAGCCTAATTG	1	Epidermal: 3
Cells_Trunk_TAGAACCGCAAG	4	Neoblast: 0
Cells_Trunk_AAGACACGTGAT	27	Intestine: 19
Cells_Trunk_TGAATAACTGGA	6	Neural: 1
Cells_Trunk_GGTATGTCCCCC	1	Epidermal: 2
Cells_Trunk_GTATGCAAACGA.x	4	Neoblast: 0
Cells_Trunk_CAGGAAATCCAN	34	Parapharyngeal: 12
Cells_Trunk_GAAATTTTCGTA	22	Cathepsin+ cells: 10
Cells_Trunk_CAAGAAGATCGG	6	Neural: 1
Cells_Trunk_ATCTGAGTAAGA	25	Cathepsin+ cells: 15
Cells_Trunk_GTAGTGTCCGGA	5	Epidermal: 3
Cells_Trunk_ATGGAACAAATA	4	Neoblast: 0
Cells_Trunk_CAACTATTGCAC	18	Cathepsin+ cells: 4
Cells_Trunk_TATCCGAACTAA	56	Neural: 8
Cells_Trunk_ATGGTGACGGCT	24	Neoblast: 0
Cells_Trunk_CGTACGGAGCGG	11	Epidermal: 2
Cells_Trunk_GTCTCATGAGGA	7	Neural: 1
Cells_Trunk_CTACAAAAAAGG	3	Neural: 1
Cells_Trunk_GCCGATAGCTAT	33	Neural: 18
Cells_Trunk_AATAGGAGATGG	20	Cathepsin+ cells: 4
Cells_Trunk_CGACGTTTTTGT	61	Epidermal: 2
Cells_Trunk_ACTCGCACCTTG	30	Epidermal: 3
Cells_Trunk_TGTCTAGGCCCA	30	Epidermal: 3
Cells_Trunk_GGCAAATTATAA	5	Epidermal: 3
Cells_Trunk_GCCGATTGACTA	5	Epidermal: 3
Cells_Trunk_CAAAAATTGTGA	15	Cathepsin+ cells: 4
Cells_Trunk_CCTTCCTGAACA	30	Pharynx: 25
Cells_Trunk_GTCTGCCTATCN	31	Intestine: 6
Cells_Trunk_AGAATAGTGAGC	18	Cathepsin+ cells: 4
Cells_Trunk_TAGTAGGAGGAG	15	Cathepsin+ cells: 4
Cells_Trunk_TAAGTATTGCGA	25	Cathepsin+ cells: 17
Cells_Trunk_TAAACCATCCCG	2	Epidermal: 2
Cells_Trunk_GGCATGGCCCTN	7	Cathepsin+ cells: 4
Cells_Trunk_GCTCGGAGTCTA	4	Neoblast: 0
Cells_Trunk_GGATCCACTACG	5	Epidermal: 3
Cells_Trunk_CTAGAGCATCAC	29	Pharynx: 25
Cells_Trunk_GATGAAAATGCG	18	Cathepsin+ cells: 4
Cells_Trunk_TCAGGTATGGTG	2	Epidermal: 2
Cells_Trunk_CTGAACCTCTCT	2	Epidermal: 2
Cells_Trunk_AATGCGCTGGCT	17	Cathepsin+ cells: 4
Cells_Trunk_CTATGCCTGTAG	16	Muscle: 7
Cells_Trunk_ATTGTTCCACAN	2	Epidermal: 2
Cells_Trunk_GGAGACCGTAGT	18	Cathepsin+ cells: 4
Cells_Trunk_TGGGTGACCCTA	5	Epidermal: 3
Cells_Trunk_GAGATACACGTT	12	Intestine: 6
Cells_Trunk_TCAGACAAAGGA	1	Epidermal: 3
Cells_Trunk_AACTATCGTAGA	46	Parapharyngeal: 12
Cells_Trunk_AAATCGAGCTCC	6	Neural: 1
Cells_Trunk_ATAAACCAATGA	5	Epidermal: 3
Cells_Trunk_GCCTGTCTGTAT	7	Protonephridia: 26
Cells_Trunk_AGTTGAGGACCG	15	Cathepsin+ cells: 4
Cells_Trunk_CCGCCTCGACTG	20	Cathepsin+ cells: 4
Cells_Trunk_TTTATAATAGCN	46	Neural: 1
Cells_Trunk_ATATACAAGGAC	20	Cathepsin+ cells: 4
Cells_Trunk_ACTTCTTGGTGG	15	Cathepsin+ cells: 4
Cells_Trunk_AGCCGGGTTACC	1	Epidermal: 3
Cells_Trunk_GGCACCATGTTT	47	Neural: 1
Cells_Trunk_CTAGTTAAAGGA	15	Cathepsin+ cells: 4
Cells_Trunk_GGACACCAAGCC	7	Neoblast: 5
Cells_Trunk_GGCGGTGGACTN	32	Parapharyngeal: 12
Cells_Trunk_ACTAGATGATTC	54	Parapharyngeal: 12
Cells_Trunk_TTCCCTCACGCN	2	Epidermal: 2
Cells_Trunk_GCGACTCCTACC	49	Neural: 1
Cells_Trunk_GCGCTTAAGCCG	29	Pharynx: 25
Cells_Trunk_ATGCTGTGGTAT	33	Neural: 8
Cells_Trunk_GCCGCTGTATTN	25	Cathepsin+ cells: 17
Cells_Trunk_ATCATAGCTTAT	5	Epidermal: 35
Cells_Trunk_ATGGTATTATGG	13	Epidermal: 11
Cells_Trunk_TATTTCCGCAAA	29	Pharynx: 25
Cells_Trunk_GGGTTTCCCAGT	12	Intestine: 6
Cells_Trunk_GAAGCTATTACG	9	Neural: 8
Cells_Trunk_TGAGTGCCGGAT	7	Neoblast: 0
Cells_Trunk_CAAGAGTAACCC	7	Neoblast: 0
Cells_Trunk_AGTCATAGGCGC	1	Epidermal: 3
Cells_Trunk_AACATCCTATGC	5	Epidermal: 3
Cells_Trunk_GCCTCTCTCTTC	22	Cathepsin+ cells: 10
Cells_Trunk_TCAGAACCGCTC	15	Cathepsin+ cells: 4
Cells_Trunk_GAGAAACGTAGA	13	Epidermal: 11
Cells_Trunk_CGCATTCTGAAT	6	Neural: 1
Cells_Trunk_CACTTCCGCTGA	46	Parapharyngeal: 12
Cells_Trunk_TAATAGCGCAAT	30	Neoblast: 5
Cells_Trunk_CTCCTGAAGAGN	5	Epidermal: 3
Cells_Trunk_CTTCTGACCGTC	26	Muscle: 14
Cells_Trunk_CCCCTTTTGATN	29	Pharynx: 25
Cells_Trunk_GGCCGCCTAATC	4	Neoblast: 0
Cells_Trunk_CCGGCATCTCAA	13	Epidermal: 11
Cells_Trunk_CGTCCGTCACAC	3	Neural: 1
Cells_Trunk_AATTTCTAGCTA	16	Muscle: 7
Cells_Trunk_AATTGACCAGGC	5	Epidermal: 3
Cells_Trunk_CGTCCCACCTGA	12	Intestine: 6
Cells_Trunk_GTTTGACGAAGC	9	Neural: 9
Cells_Trunk_TTGATGAGTCGG	2	Epidermal: 3
Cells_Trunk_TAAGTTTCTCAT	13	Epidermal: 24
Cells_Trunk_GGATCAGTCAGT	4	Neoblast: 0
Cells_Trunk_GATACAACCGGN	17	Cathepsin+ cells: 4
Cells_Trunk_TAATTCGCAGTC	1	Epidermal: 2
Cells_Trunk_TACAATAGGGCN	2	Epidermal: 2
Cells_Trunk_CCAGGTGGACGC	27	Intestine: 19
Cells_Trunk_AGACGATAGCAA	15	Cathepsin+ cells: 4
Cells_Trunk_AGGACACCGGTC	11	Epidermal: 2
Cells_Trunk_AATGCGTATTTA	17	Cathepsin+ cells: 15
Cells_Trunk_TCTTAGGCCCTC	51	Neural: 20
Cells_Trunk_TCTAGGTACCAC	31	Intestine: 6
Cells_Trunk_GTGACCTCGTAN	27	Intestine: 19
Cells_Trunk_AGCTTTGATAAC	4	Neoblast: 5
Cells_Trunk_TGCTTGGTCTAT	56	Neural: 8
Cells_Trunk_ACGTATCCTGCT	4	Neoblast: 0
Cells_Trunk_CTACGGAAGCAC	4	Neoblast: 0
Cells_Trunk_CAATGGGTCATA	20	Cathepsin+ cells: 4
Cells_Trunk_GACTAAATACCT	25	Cathepsin+ cells: 17
Cells_Trunk_TAGCCTAACCGA	3	Neural: 1
Cells_Trunk_AGTCCTGGTATG	20	Cathepsin+ cells: 4
Cells_Trunk_ACTGTTTTCCAG	39	Epidermal: 11
Cells_Trunk_CTGTCACACGAN	20	Cathepsin+ cells: 4
Cells_Trunk_GACTCTTAACAA	20	Cathepsin+ cells: 4
Cells_Trunk_TACACGATCCCC	36	Protonephridia: 26
Cells_Trunk_TTCTTGAAGACC	20	Cathepsin+ cells: 4
Cells_Trunk_TATAATCTTCGT	13	Epidermal: 11
Cells_Trunk_AGTAGCAGGCTN	4	Neoblast: 5
Cells_Trunk_GGCGCCAAGAGG	15	Cathepsin+ cells: 4
Cells_Trunk_AAAGCTGAGACN	2	Epidermal: 3
Cells_Trunk_GCTTAAAAGCGC	29	Pharynx: 25
Cells_Trunk_TGTCTTCACCCC	15	Cathepsin+ cells: 4
Cells_Trunk_TAGCTCAACTGA	11	Epidermal: 2
Cells_Trunk_GCCCATGACCAT	7	Neural: 1
Cells_Trunk_TAGAGGTGTTAA	20	Cathepsin+ cells: 4
Cells_Trunk_CTTCGTAGGTCN	6	Neural: 1
Cells_Trunk_GGCCCTGACGCT	6	Neural: 1
Cells_Trunk_TAAGGATTGGTT	3	Neural: 1
Cells_Trunk_TCGTGGAACCTG	5	Epidermal: 3
Cells_Trunk_AAGTCTTTCCAT	20	Cathepsin+ cells: 4
Cells_Trunk_GGGCGAGGACAA	27	Neural: 1
Cells_Trunk_GTTGACCCCGAN	5	Epidermal: 3
Cells_Trunk_TGTCATGGGTGA	6	Neural: 1
Cells_Trunk_CCGCCCTTGGGC	6	Neural: 1
Cells_Trunk_CACTAAATTCCC	19	Neural: 20
Cells_Trunk_ATGTGTGCTACG	5	Epidermal: 2
Cells_Trunk_ACGAATTACCTG	34	Parapharyngeal: 12
Cells_Trunk_CTCTCTCAAAAA	2	Epidermal: 3
Cells_Trunk_GAACGACTTGGN	15	Cathepsin+ cells: 4
Cells_Trunk_CGCATTACCGAC	47	Neural: 18
Cells_Trunk_CATCGTTCCCCA	1	Epidermal: 3
Cells_Trunk_CACATTGGCGGA	20	Cathepsin+ cells: 4
Cells_Trunk_GTACCGTGGTCG	34	Parapharyngeal: 12
Cells_Trunk_TAGGGTATAAGT	20	Cathepsin+ cells: 4
Cells_Trunk_ACAATAGCATAG	15	Cathepsin+ cells: 4
Cells_Trunk_TCAGGCTTACGT	1	Epidermal: 3
Cells_Trunk_CGGACGCAACGG	1	Epidermal: 3
Cells_Trunk_GAAGGGAGGTAA	21	Muscle: 7
Cells_Trunk_CTTGGTGTAGAG	2	Epidermal: 2
Cells_Trunk_TCGACAACCACA	11	Epidermal: 2
Cells_Trunk_TATAGGGCCACG	32	Parapharyngeal: 12
Cells_Trunk_AAGTGGAGACCA	5	Epidermal: 3
Cells_Trunk_TGACAAAGGGGT	4	Neoblast: 0
Cells_Trunk_CCCCACAGCTGN	1	Epidermal: 3
Cells_Trunk_GGTGAGTAAACC	15	Cathepsin+ cells: 4
Cells_Trunk_CGCTGATTGTAN	5	Epidermal: 3
Cells_Trunk_CGCGGCGTACAT	18	Cathepsin+ cells: 4
Cells_Trunk_CAGACATCGGTG	15	Cathepsin+ cells: 4
Cells_Trunk_ACTGTTGGCTGA	16	Muscle: 7
Cells_Trunk_GGTAGAGGTACC	3	Neural: 8
Cells_Trunk_GTGGAGGATATG	61	Epidermal: 3
Cells_Trunk_ACGGTAAACGTA	25	Cathepsin+ cells: 17
Cells_Trunk_AGGCCGACTAAG	15	Cathepsin+ cells: 4
Cells_Trunk_GTATCGACACGC	15	Cathepsin+ cells: 4
Cells_Trunk_CAACTCCGGCTA	16	Cathepsin+ cells: 4
Cells_Trunk_CTTAGGAATTTC	3	Neural: 1
Cells_Trunk_AGTGGCCCCTTN	25	Cathepsin+ cells: 17
Cells_Trunk_AAACATTGCCTG	34	Parapharyngeal: 12
Cells_Trunk_GTAGTAGCGTGT	1	Epidermal: 3
Cells_Trunk_ACCGGCTATAAA	5	Epidermal: 3
Cells_Trunk_CGGCTCTCGGGG	7	Neoblast: 0
Cells_Trunk_TAACCGCCTCCG	18	Cathepsin+ cells: 10
Cells_Trunk_AAGCTATCCCAC	41	Protonephridia: 29
Cells_Trunk_ACCCACCTTTGT	47	Neural: 18
Cells_Trunk_TGTAGAAAACAC	2	Epidermal: 2
Cells_Trunk_AGTCCTATGGCC	16	Muscle: 7
Cells_Trunk_CGGCGACTATGA	6	Neural: 1
Cells_Trunk_ATTCATGTAATC	25	Cathepsin+ cells: 17
Cells_Trunk_GGCGGTAGCGCG	5	Epidermal: 3
Cells_Trunk_TCTAGGTACGCG	15	Cathepsin+ cells: 4
Cells_Trunk_TACAGGAGAGAA	5	Epidermal: 3
Cells_Trunk_TACTTAGATAGC	1	Epidermal: 2
Cells_Trunk_CACCCAACATAA	2	Epidermal: 2
Cells_Trunk_CGAATCTTGTGG	15	Cathepsin+ cells: 4
Cells_Trunk_TTATCACGTTCC	20	Cathepsin+ cells: 4
Cells_Trunk_CTCTGTGCAGAC	61	Epidermal: 3
Cells_Trunk_TTACTTGATCAN	40	Parapharyngeal: 12
Cells_Trunk_AAGGACAAATGC	7	Neural: 1
Cells_Trunk_GGACACGGGAGT	40	Parapharyngeal: 38
Cells_Trunk_AGGTGTGAACCC	21	Muscle: 14
Cells_Trunk_GACGATCTAGTA	7	Neoblast: 5
Cells_Trunk_TACCAGGTACTT	25	Cathepsin+ cells: 17
Cells_Trunk_CAATTCACGCAT	16	Muscle: 7
Cells_Trunk_CGTTGCGCCTTC	30	Epidermal: 3
Cells_Trunk_GAAGTTAGAAGN	15	Cathepsin+ cells: 4
Cells_Trunk_AGTATCGATGTC	42	Intestine: 30
Cells_Trunk_TAACGGAGTGGC	1	Epidermal: 3
Cells_Trunk_TCTCGCGTGTGA	1	Epidermal: 3
Cells_Trunk_ATGCTGAAGCAC	13	Epidermal: 11
Cells_Trunk_CTAGGCATGCTG	21	Muscle: 7
Cells_Trunk_TTGTAGGTGCAA	40	Neural: 1
Cells_Trunk_TGTACACGGCGG	4	Neoblast: 5
Cells_Trunk_CGCAATGGTCGA	5	Epidermal: 3
Cells_Trunk_GATATGAGAGAG	25	Cathepsin+ cells: 17
Cells_Trunk_ACCTAAAGCCAG	42	Pharynx: 25
Cells_Trunk_CGGTGTATGGGC	7	Neoblast: 0
Cells_Trunk_GGTAATAGCGAC	27	Intestine: 19
Cells_Trunk_CTCAATAGGATA	3	Neural: 1
Cells_Trunk_CTGGGTTACGCG	16	Muscle: 7
Cells_Trunk_CCTGTGCCCGGN	2	Epidermal: 2
Cells_Trunk_TAGGGTACCCGT	2	Epidermal: 2
Cells_Trunk_CGGTACCCGAGA	25	Cathepsin+ cells: 17
Cells_Trunk_TGGCGCGTTAGN	7	Neoblast: 5
Cells_Trunk_CATCAGAGTTCT	3	Neural: 1
Cells_Trunk_TAAGATACGATN	7	Neoblast: 5
Cells_Trunk_AGGGGTTGCCCT	14	Neoblast: 5
Cells_Trunk_TAGCTCTGACTG	21	Muscle: 7
Cells_Trunk_CCGAATATTGCA	6	Neural: 1
Cells_Trunk_CTTTCAGATCAT	6	Neural: 1
Cells_Trunk_GTCAACGAAGTT	5	Epidermal: 3
Cells_Trunk_ACATAGTATACA	7	Neoblast: 5
Cells_Trunk_TCAGCCAAAATT	1	Epidermal: 3
Cells_Trunk_GATTACATCTGC	1	Epidermal: 3
Cells_Trunk_CAGTTGGTGGAG	51	Neural: 20
Cells_Trunk_TAGATCTATATA	45	Cathepsin+ cells: 28
Cells_Trunk_GCTATATCTGCA	6	Neural: 1
Cells_Trunk_CAGTTCGCCCTA	1	Epidermal: 2
Cells_Trunk_GTTGTCAAGTGN	0	Neoblast: 0
Cells_Trunk_GATAGGTGTGCT	15	Cathepsin+ cells: 4
Cells_Trunk_AGTACGTCGACT	16	Muscle: 7
Cells_Trunk_GAGCAAAATGGC	16	Muscle: 7
Cells_Trunk_TGTCGGATGACC	21	Muscle: 14
Cells_Trunk_TTTTGAACCATG	20	Cathepsin+ cells: 4
Cells_Trunk_CTCTCTGTTGAN	31	Intestine: 6
Cells_Trunk_ACACCAGGACGA	17	Cathepsin+ cells: 4
Cells_Trunk_AGAGATTGTCGA	15	Cathepsin+ cells: 4
Cells_Trunk_GTAAGCTAGGTG	1	Epidermal: 3
Cells_Trunk_ATCAGGGCGTGC	34	Parapharyngeal: 12
Cells_Trunk_TTTTGCAGTACT	1	Epidermal: 2
Cells_Trunk_GATAATCAAATC	6	Neural: 1
Cells_Trunk_TGAATGATTTAT	42	Pharynx: 25
Cells_Trunk_GGAAATTGTTGT	18	Cathepsin+ cells: 10
Cells_Trunk_GAGTCCGGTTTG	2	Epidermal: 2
Cells_Trunk_CAAGAATAATTN	16	Muscle: 7
Cells_Trunk_TATAGATCATTA	4	Neoblast: 5
Cells_Trunk_TCCTGACTCCTT	34	Parapharyngeal: 12
Cells_Trunk_TACATGGTAGAA	6	Neural: 1
Cells_Trunk_TAGGAGGGGTCC	1	Epidermal: 3
Cells_Trunk_CCCAACAGATGT	43	Parapharyngeal: 12
Cells_Trunk_GCGCGGCCCGAC	25	Cathepsin+ cells: 17
Cells_Trunk_GAGACTAGTACG	7	Neoblast: 5
Cells_Trunk_TCTCCCACTTAA	3	Neural: 18
Cells_Trunk_TTTAGTACCTCN	22	Cathepsin+ cells: 10
Cells_Trunk_TTACCTGAACAA	6	Neural: 1
Cells_Trunk_ACCCGGTTCTAA	5	Epidermal: 3
Cells_Trunk_TACGCAGTTAAC	16	Muscle: 7
Cells_Trunk_GCCAGCTGTTGA	7	Neoblast: 5
Cells_Trunk_CCAGTCCTACAG	17	Cathepsin+ cells: 4
Cells_Trunk_CTAGGTTGCGCG	5	Epidermal: 3
Cells_Trunk_ACCTAGATCCGG	4	Neoblast: 0
Cells_Trunk_TGCTCGTTGGAC	17	Cathepsin+ cells: 15
Cells_Trunk_CAGCGTCGTAGG	7	Neoblast: 5
Cells_Trunk_GTTGAAGAAAGG	18	Cathepsin+ cells: 10
Cells_Trunk_CTAGATAAACTT	15	Cathepsin+ cells: 4
Cells_Trunk_AGTATCAATTCN	29	Pharynx: 25
Cells_Trunk_TTGTTTGCTCCN	25	Cathepsin+ cells: 17
Cells_Trunk_CACTAACTGCGC	7	Neoblast: 5
Cells_Trunk_CAGTGAAATCCA	34	Parapharyngeal: 12
Cells_Trunk_AATTATGGAACC	15	Cathepsin+ cells: 4
Cells_Trunk_GCTGGGTCTACG	5	Epidermal: 3
Cells_Trunk_GGGAGACAGTCT	34	Parapharyngeal: 12
Cells_Trunk_CGTCGACGATTG	29	Pharynx: 25
Cells_Trunk_ATAAAATCAGTA	24	Neoblast: 22
Cells_Trunk_CCTGGGATGTGA	25	Cathepsin+ cells: 17
Cells_Trunk_ACTCCGAGGAGC	0	Neoblast: 0
Cells_Trunk_GTAGCCTAACTN	4	Neoblast: 5
Cells_Trunk_AACCAGAAAGGT	5	Epidermal: 3
Cells_Trunk_TTGTTAGAATCN	3	Neural: 1
Cells_Trunk_AGCTCATTCTAC	6	Neural: 1
Cells_Trunk_CCCCTCGCGTAN	15	Cathepsin+ cells: 4
Cells_Trunk_AAGTAATAGAAG	6	Neural: 1
Cells_Trunk_GCGTGTAGACGC	7	Neoblast: 0
Cells_Trunk_TCATCGCGGGTT	2	Epidermal: 3
Cells_Trunk_CGCTTAAAACTG	5	Epidermal: 3
Cells_Trunk_GGATTCATTAGA	12	Intestine: 6
Cells_Trunk_GACACTTGTGGC	17	Cathepsin+ cells: 4
Cells_Trunk_GGACACGTGATC	32	Parapharyngeal: 12
Cells_Trunk_AGGAATGCGTTC	4	Neoblast: 5
Cells_Trunk_CGTTATCGGTCC	46	Parapharyngeal: 12
Cells_Trunk_TGTCCGCTCGTT	6	Neural: 1
Cells_Trunk_TGACTTTTATGA	4	Neoblast: 5
Cells_Trunk_TTGAATTCTGAA	5	Epidermal: 3
Cells_Trunk_CGAGTTGCAAGN	7	Neoblast: 5
Cells_Trunk_TCAGACAAAGGG	15	Cathepsin+ cells: 4
Cells_Trunk_ACAGAGTAATAA	3	Neural: 1
Cells_Trunk_GCCCGGACTAAT	20	Cathepsin+ cells: 4
Cells_Trunk_CCCACATACTCA	53	Neural: 33
Cells_Trunk_ATACGGATCACT	1	Epidermal: 3
Cells_Trunk_ATCGCTCCGTAN	1	Epidermal: 3
Cells_Trunk_ACGGTCCGAGCG	1	Epidermal: 3
Cells_Trunk_CTAGAGTTAGTT	42	Intestine: 30
Cells_Trunk_GTGGCGAGCGCA	7	Muscle: 7
Cells_Trunk_TCGTCTACTAGN	30	Neoblast: 5
Cells_Trunk_GGTATGAGAAAT	40	Parapharyngeal: 12
Cells_Trunk_CTCCGCTCCTGG	5	Epidermal: 3
Cells_Trunk_CGAGAAACTGGT	3	Neural: 1
Cells_Trunk_CTTGTAGGATAC	2	Epidermal: 2
Cells_Trunk_CATAGACTCCGT	6	Neural: 1
Cells_Trunk_CAGGTCATCGAG	16	Muscle: 7
Cells_Trunk_TTATGCTTGCCG	1	Epidermal: 2
Cells_Trunk_CGCTTAGGATCC	3	Neural: 1
Cells_Trunk_ATCATAAGGTGN	4	Neural: 1
Cells_Trunk_ATGCCTCGAGCN	5	Epidermal: 3
Cells_Trunk_CTAAAAGGTCCN	5	Epidermal: 3
Cells_Trunk_ATAGTGAGCAAT	6	Neural: 1
Cells_Trunk_CGAGCAGAGAAA	6	Neural: 1
Cells_Trunk_CCGCGTGAACCC	45	Cathepsin+ cells: 28
Cells_Trunk_ATGCAGTATTTG	16	Muscle: 7
Cells_Trunk_TCGATTCTCCGT	13	Epidermal: 11
Cells_Trunk_ATCCGGCTTGAN	12	Intestine: 6
Cells_Trunk_TTCTGAAGACCN	20	Cathepsin+ cells: 4
Cells_Trunk_AGCTGTGCAAAT	7	Neoblast: 5
Cells_Trunk_ATCAATCTATTT	17	Cathepsin+ cells: 15
Cells_Trunk_CGGCGTCGAGCC	5	Epidermal: 3
Cells_Trunk_GAGGGATCGGAC	30	Epidermal: 3
Cells_Trunk_CAGATAGCGGCG	17	Cathepsin+ cells: 4
Cells_Trunk_TCGGAAAATGTC	19	Neural: 23
Cells_Trunk_GACGATGTAGAC	5	Epidermal: 3
Cells_Trunk_GATATAGCCGTG	7	Neoblast: 5
Cells_Trunk_CATCCTCGGAAT	6	Neural: 1
Cells_Trunk_GTGTGGCTAGGA	34	Parapharyngeal: 12
Cells_Trunk_AAGTCGACCCAG	25	Cathepsin+ cells: 17
Cells_Trunk_TTCGGCACATAC	1	Epidermal: 3
Cells_Trunk_AAGCGAAGCTTT	5	Epidermal: 3
Cells_Trunk_GAGGGGTCGATG	2	Epidermal: 3
Cells_Trunk_ACAGGCACCGGC	15	Cathepsin+ cells: 4
Cells_Trunk_CTGATGTCGGTT	2	Epidermal: 2
Cells_Trunk_GTTGTCCCCATA	1	Epidermal: 3
Cells_Trunk_GAGCTTTGAGTA	7	Neoblast: 5
Cells_Trunk_AGACTTGGATTC	41	Protonephridia: 29
Cells_Trunk_ATTGGAGATGTT	7	Muscle: 7
Cells_Trunk_ATCCGGTCAGGN	46	Parapharyngeal: 12
Cells_Trunk_TGCACCCCACAT	15	Cathepsin+ cells: 4
Cells_Trunk_TAATAAGTGCAC	6	Neural: 1
Cells_Trunk_TAATCTTAACCC	6	Intestine: 19
Cells_Trunk_CCCCCGGCCAAA	65	Neural: 8
Cells_Trunk_TTTAAACCTGAA	3	Neural: 1
Cells_Trunk_CGGTCTTAAGTG	16	Muscle: 7
Cells_Trunk_CTTACCATGCGN	27	Intestine: 19
Cells_Trunk_GTTGGCTCAGAT	49	Neural: 36
Cells_Trunk_ATCGGCTCTCCN	31	Intestine: 6
Cells_Trunk_CCGCGCCACGCT	2	Epidermal: 2
Cells_Trunk_TGGCTCGGATAN	13	Epidermal: 11
Cells_Trunk_CTAAATAGGTCC	5	Epidermal: 3
Cells_Trunk_TCATGAGCAGTC	6	Neural: 1
Cells_Trunk_TCCACCATTTGG	32	Parapharyngeal: 12
Cells_Trunk_TCACTTTTAGAG	45	Cathepsin+ cells: 28
Cells_Trunk_AAACTACAGACC	5	Epidermal: 3
Cells_Trunk_TTGGTGCTGCCG	21	Muscle: 7
Cells_Trunk_GCCCTTGGTAGT	1	Epidermal: 3
Cells_Trunk_AGTCTTGCGGTA	6	Neural: 1
Cells_Trunk_GAACCAGCTCCG	61	Epidermal: 3
Cells_Trunk_GAAGGCAGGTTC	17	Cathepsin+ cells: 15
Cells_Trunk_CCGATGGTCCGG	12	Intestine: 6
Cells_Trunk_TGGGGCTACTCG	2	Epidermal: 2
Cells_Trunk_TATAGTTTACCA	2	Epidermal: 2
Cells_Trunk_CGCGGGCGGAAA	12	Intestine: 6
Cells_Trunk_CCAGGGATCGCG	17	Cathepsin+ cells: 15
Cells_Trunk_ATAAGTTTCTTA	46	Parapharyngeal: 12
Cells_Trunk_CTCGCGATTCTN	33	Neural: 18
Cells_Trunk_GCTCAGGTACAG	15	Cathepsin+ cells: 4
Cells_Trunk_TTGTATCTGCTC	1	Epidermal: 3
Cells_Trunk_GGGCCAAATTTG	24	Neoblast: 5
Cells_Trunk_CAGAAAATGAAT	52	Epidermal: 35
Cells_Trunk_GAGTAGCCGTCG	24	Intestine: 6
Cells_Trunk_AATGATCAATCT	31	Intestine: 6
Cells_Trunk_GAAAACTTGCGA	30	Neoblast: 5
Cells_Trunk_GAGTCGCTTTCG	20	Cathepsin+ cells: 4
Cells_Trunk_GCAACGACCGAA	15	Cathepsin+ cells: 4
Cells_Trunk_TATGCACACTAC	31	Intestine: 6
Cells_Trunk_AGTTAATTACAC	25	Cathepsin+ cells: 17
Cells_Trunk_CACACGCCGGGG	17	Cathepsin+ cells: 15
Cells_Trunk_AGGGATTTCGTA	17	Cathepsin+ cells: 4
Cells_Trunk_TGGAGCGTCGGA	16	Muscle: 7
Cells_Trunk_AAGTGTTCACTG	6	Neural: 1
Cells_Trunk_CCCTATATCCTG	31	Intestine: 6
Cells_Trunk_CTCGTTGGGGAC	32	Parapharyngeal: 12
Cells_Trunk_CGGCGAGCTCCA	25	Cathepsin+ cells: 17
Cells_Trunk_GACGGGACGACG	1	Epidermal: 3
Cells_Trunk_GTCGGTGTGCGT	1	Epidermal: 3
Cells_Trunk_TAACGTTCAGAA	6	Pharynx: 25
Cells_Trunk_ATCCGAAGTGCG	1	Epidermal: 3
Cells_Trunk_GCGCGTGCCGCG	29	Pharynx: 25
Cells_Trunk_CGAATCAGGACG	30	Epidermal: 3
Cells_Trunk_TAACCGTTTTCG	34	Parapharyngeal: 12
Cells_Trunk_CAACGTACGAAN	22	Cathepsin+ cells: 10
Cells_Trunk_ACACCTATATGT	49	Neural: 36
Cells_Trunk_CGAATCAGACGC	6	Neural: 1
Cells_Trunk_CATCCGAACAAN	18	Cathepsin+ cells: 4
Cells_Trunk_ATGCCGTGTATC	26	Muscle: 14
Cells_Trunk_AACGCCGTATCG	15	Cathepsin+ cells: 4
Cells_Trunk_CGTTTCATCTGC	21	Muscle: 7
Cells_Trunk_TCTCAGGTTGGC	16	Muscle: 7
Cells_Trunk_AGGTGCAGACTC	29	Pharynx: 25
Cells_Trunk_GAAACGTTTTCA	25	Cathepsin+ cells: 17
Cells_Trunk_GGAGATCAGGTA	15	Cathepsin+ cells: 4
Cells_Trunk_CTCTTACTCTAG	7	Neoblast: 5
Cells_Trunk_TCGTTGCGGGCN	30	Neoblast: 5
Cells_Trunk_CTTATGAGCCGT	40	Parapharyngeal: 12
Cells_Trunk_CGGCTGTCGGAG	27	Intestine: 19
Cells_Trunk_GGCCGCATAGCT	36	Protonephridia: 26
Cells_Trunk_TAATATCACTGG	46	Parapharyngeal: 12
Cells_Trunk_CGTGGATGCGGN	5	Epidermal: 3
Cells_Trunk_GGCTCCCAACTT	36	Protonephridia: 26
Cells_Trunk_AAAAATGTGGAT	5	Epidermal: 3
Cells_Trunk_AAAGCGATTCTG	16	Muscle: 7
Cells_Trunk_TGCCAATCAGGT	5	Epidermal: 3
Cells_Trunk_CCAACGTATAAA	1	Epidermal: 3
Cells_Trunk_TCAACTCAGACA	27	Intestine: 19
Cells_Trunk_CGGATAGGACCA	32	Neoblast: 5
Cells_Trunk_CGGAGGAGCTCG	1	Epidermal: 3
Cells_Trunk_ATCCTGCTGACA	15	Cathepsin+ cells: 4
Cells_Trunk_GAGGGTGTAGAA	7	Neural: 1
Cells_Trunk_CCTCAAGCTACT	1	Epidermal: 3
Cells_Trunk_GCGACGTAAGTC	7	Protonephridia: 26
Cells_Trunk_ACCTCGTTCTTG	56	Neural: 8
Cells_Trunk_GTCCCGTCCGCT	25	Cathepsin+ cells: 17
Cells_Trunk_CCTGGGCAAAGA	20	Cathepsin+ cells: 4
Cells_Trunk_ATGAATATTAGN	20	Cathepsin+ cells: 4
Cells_Trunk_GGCTAAAGTGCA	15	Cathepsin+ cells: 4
Cells_Trunk_GTGTCGAGTTTC	13	Neural: 1
Cells_Trunk_ACAGCGTATTCG	15	Cathepsin+ cells: 4
Cells_Trunk_TGTTGGTTCAGG	34	Parapharyngeal: 12
Cells_Trunk_CTAGAGTATAGN	5	Epidermal: 3
Cells_Trunk_GTACCTTAGGGC	47	Neural: 1
Cells_Trunk_TGAGAGGCTTGA	3	Neural: 1
Cells_Trunk_CGTTAAGGCCAG	16	Muscle: 7
Cells_Trunk_CCAGTCATATGA	5	Neural: 1
Cells_Trunk_CAAAGTTCGAGC	54	Parapharyngeal: 12
Cells_Trunk_AACTAAAGGTCG	25	Cathepsin+ cells: 17
Cells_Trunk_CCCGCACATACC	15	Cathepsin+ cells: 4
Cells_Trunk_CCTATAGTCCTA	5	Epidermal: 3
Cells_Trunk_GTAATGAATTCT.x	7	Neoblast: 5
Cells_Trunk_TGCTGGGACCCT	41	Protonephridia: 29
Cells_Trunk_TCATACCTTTTA	53	Neural: 33
Cells_Trunk_GTCGGACACTTG	5	Epidermal: 3
Cells_Trunk_CTGACACCCAAT	29	Pharynx: 25
Cells_Trunk_AGTCGACCGATA	25	Cathepsin+ cells: 17
Cells_Trunk_TTTGGATACGAC	1	Epidermal: 3
Cells_Trunk_GTTAAGACAACG	17	Cathepsin+ cells: 15
Cells_Trunk_TATTCTCAAATA	21	Muscle: 7
Cells_Trunk_CTTAATTTACAA	25	Cathepsin+ cells: 17
Cells_Trunk_GCATACCATACT	11	Epidermal: 2
Cells_Trunk_CTCCCATAAATN	1	Epidermal: 3
Cells_Trunk_GTCTTGTCTCTG	29	Pharynx: 25
Cells_Trunk_TCCCAACGGCTA	27	Intestine: 19
Cells_Trunk_ATTCTAGTCAGT	3	Neural: 1
Cells_Trunk_CGGCGCGCAGAT	18	Cathepsin+ cells: 4
Cells_Trunk_CCCTGTGCCCGG	1	Epidermal: 3
Cells_Trunk_GGGTGTCTGTTC	20	Cathepsin+ cells: 4
Cells_Trunk_TTTTAACATCTN	15	Cathepsin+ cells: 4
Cells_Trunk_TCCAGTGCCGTT	25	Cathepsin+ cells: 17
Cells_Trunk_TAATAATAGAAN	5	Epidermal: 3
Cells_Trunk_CAGGATCCAGCA	6	Neural: 1
Cells_Trunk_CCGATATCTAGG	15	Cathepsin+ cells: 4
Cells_Trunk_ATCCGGTCAGGG	46	Parapharyngeal: 12
Cells_Trunk_CTGTCTATTTCC	17	Cathepsin+ cells: 15
Cells_Trunk_ACTGCGTGCCCT	34	Parapharyngeal: 12
Cells_Trunk_TGAATAGAGCCG	15	Cathepsin+ cells: 4
Cells_Trunk_TAGTTACCACAA	3	Neural: 1
Cells_Trunk_TGCCACTCACCT	3	Neural: 1
Cells_Trunk_GAACAGCAACTN	16	Muscle: 7
Cells_Trunk_TCCTTCGATAAT	30	Protonephridia: 26
Cells_Trunk_CGGCTATGTGAA	61	Cathepsin+ cells: 4
Cells_Trunk_CTAACGCCTATA	16	Muscle: 7
Cells_Trunk_CTGTACAACCTT	45	Cathepsin+ cells: 28
Cells_Trunk_TTTGACCTATTC	6	Neural: 1
Cells_Trunk_TGAGATATATTC	25	Cathepsin+ cells: 17
Cells_Trunk_ACCGCGGACGAC	11	Epidermal: 2
Cells_Trunk_ATGAGGGGAAGN	36	Protonephridia: 26
Cells_Trunk_ACTTAGTTGGCT	15	Cathepsin+ cells: 4
Cells_Trunk_AGAATCGCACTA	9	Neural: 23
Cells_Trunk_GCATGTCTTCCC	15	Cathepsin+ cells: 4
Cells_Trunk_CGGCTTCCAATA	17	Cathepsin+ cells: 4
Cells_Trunk_GCTTCTGTCTCC	36	Protonephridia: 26
Cells_Trunk_GCCGCACGGTTG	3	Neural: 1
Cells_Trunk_GATTTCAACCAC	22	Cathepsin+ cells: 10
Cells_Trunk_CGGGCGGTTGTA	11	Epidermal: 2
Cells_Trunk_GCCTGAACGGCT	15	Cathepsin+ cells: 4
Cells_Trunk_GCCCTGTAAACT	27	Intestine: 19
Cells_Trunk_CCCTGGACGCAN	26	Muscle: 14
Cells_Trunk_GGGAGCAGGATA	16	Muscle: 7
Cells_Trunk_TAAGGGGCTCAN	18	Cathepsin+ cells: 4
Cells_Trunk_ACGGCCGATATC	6	Neural: 1
Cells_Trunk_GTGCGGCTATCT	36	Protonephridia: 26
Cells_Trunk_TCGGCAATGAGC	15	Cathepsin+ cells: 4
Cells_Trunk_ACGTGGGCCTAG	16	Muscle: 7
Cells_Trunk_TAGACACGCCAN	31	Intestine: 6
Cells_Trunk_AGGATCCATGCA	5	Epidermal: 3
Cells_Trunk_ACACGAGACTGT	16	Muscle: 7
Cells_Trunk_ACGAAAGCAATT	17	Cathepsin+ cells: 15
Cells_Trunk_AGTCCTGTTCAN	7	Neoblast: 5
Cells_Trunk_GTTACTCATGCC	1	Epidermal: 3
Cells_Trunk_TAGGTCGAGTTA	6	Neural: 1
Cells_Trunk_GGCCAGCCAACN	18	Cathepsin+ cells: 4
Cells_Trunk_TTCGGAGCCCTT	6	Neural: 1
Cells_Trunk_TACACCGGTAAT	50	Neural: 32
Cells_Trunk_CTTCTTCGAAGG	6	Neural: 1
Cells_Trunk_TGCGGCAATGGT	32	Parapharyngeal: 12
Cells_Trunk_TTAGTGGTACCG	30	Epidermal: 3
Cells_Trunk_TCTATAATCAGA	22	Cathepsin+ cells: 10
Cells_Trunk_TTCTGTGCCGTT	1	Epidermal: 3
Cells_Trunk_CAGCAACCAGAC	29	Pharynx: 25
Cells_Trunk_TGCGATCGGCCN	7	Neoblast: 5
Cells_Trunk_GATCTTCCGGTN	6	Neural: 1
Cells_Trunk_CAACGCCTTTGC	36	Protonephridia: 26
Cells_Trunk_CGCAAACCTCCT	1	Epidermal: 3
Cells_Trunk_TCCACTGAGGCC	51	Neural: 18
Cells_Trunk_CGAGGCAGGCCG	27	Intestine: 19
Cells_Trunk_TGGTTGTCCGGA	26	Muscle: 14
Cells_Trunk_GTAGGTCGACTA	9	Neural: 1
Cells_Trunk_TGCCGCCATAAT	64	Neural: 8
Cells_Trunk_GCGTGTAGACCN	7	Neoblast: 5
Cells_Trunk_CATAGCACCGTG	18	Cathepsin+ cells: 4
Cells_Trunk_ACAATTTGGCGG	2	Epidermal: 3
Cells_Trunk_AGGGCACACTGA	30	Epidermal: 3
Cells_Trunk_TCCATCCCAAGA	30	Epidermal: 3
Cells_Trunk_TTGAATCCATGG	30	Epidermal: 3
Cells_Trunk_GGGGCCTTGCCT	42	Intestine: 30
Cells_Trunk_GCCTCTCGGAGA	1	Epidermal: 3
Cells_Trunk_ACTGGAGGTGAT	20	Cathepsin+ cells: 4
Cells_Trunk_ACACTGCTAATC	36	Neural: 1
Cells_Trunk_CCAGTGTACCTT	20	Cathepsin+ cells: 4
Cells_Trunk_TATCTCTAGTCT	7	Cathepsin+ cells: 4
Cells_Trunk_TAAGCAATCCTT	6	Neural: 1
Cells_Trunk_GATCGGACATGT	5	Epidermal: 3
Cells_Trunk_ACAAGTCTTCGC	25	Cathepsin+ cells: 17
Cells_Trunk_ACGCGACTGGCC	19	Neural: 20
Cells_Trunk_TACGGGAAACTN	25	Cathepsin+ cells: 17
Cells_Trunk_ACTCGCGCTATT	65	Neural: 8
Cells_Trunk_GCGAGTACCTGC	1	Epidermal: 3
Cells_Trunk_TCCCCGGACAGC	3	Neural: 1
Cells_Trunk_AGCTGGTGGTTG	46	Parapharyngeal: 12
Cells_Trunk_CACGTTGTTGGA	3	Neural: 8
Cells_Trunk_GGGAGAGATGTA	31	Intestine: 6
Cells_Trunk_CGGCCTTATACG	2	Epidermal: 2
Cells_Trunk_ACACGGCCAGTC	6	Neural: 1
Cells_Trunk_GAGGCGTTATGT	5	Epidermal: 3
Cells_Trunk_TAGCATATTGCA	16	Muscle: 7
Cells_Trunk_CAAACCATCTAT	1	Epidermal: 3
Cells_Trunk_GCAACGCCGCTG	16	Muscle: 7
Cells_Trunk_ACGGGACACGCG	1	Epidermal: 2
Cells_Trunk_GCGCACGCGTTC	18	Cathepsin+ cells: 4
Cells_Trunk_AAAGCCGGCCTG	15	Cathepsin+ cells: 4
Cells_Trunk_GAAACACCAGAC	6	Neural: 1
Cells_Trunk_ATAACTGCGTCT	15	Cathepsin+ cells: 4
Cells_Trunk_AATGCATGCCCN	1	Epidermal: 3
Cells_Trunk_TGATTTGGACTC	13	Epidermal: 11
Cells_Trunk_TCAAGACAAGTG	5	Epidermal: 3
Cells_Trunk_AGTCAGCTCGGC	15	Cathepsin+ cells: 4
Cells_Trunk_CATACCTTCCAA	25	Cathepsin+ cells: 17
Cells_Trunk_AGTTACCTCCGC	48	Cathepsin+ cells: 31
Cells_Trunk_AAGAAGATCTGN	16	Muscle: 7
Cells_Trunk_CAGCAGGCTGAA	25	Cathepsin+ cells: 17
Cells_Trunk_GAAAGAGCCTAC	20	Cathepsin+ cells: 4
Cells_Trunk_CCGCATCTCCCT	33	Neural: 1
Cells_Trunk_TAGCTCAACTAN	2	Epidermal: 2
Cells_Trunk_CAGTCGACCCAT	6	Neural: 1
Cells_Trunk_GCCGTAGAGGCC	25	Cathepsin+ cells: 17
Cells_Trunk_CCTTTGCGAGCN	7	Neoblast: 5
Cells_Trunk_TCACGCGGGTTN	2	Epidermal: 3
Cells_Trunk_ACAACGGGTCAT	9	Neural: 8
Cells_Trunk_GAGGAGCTCGGT	5	Epidermal: 3
Cells_Trunk_ACGCGAGAACAG	42	Intestine: 30
Cells_Trunk_AAACTCAGTTAG	15	Cathepsin+ cells: 4
Cells_Trunk_GGAAAGTCTTTA	35	Epidermal: 24
Cells_Trunk_TGTCAGGGATTT	1	Epidermal: 3
Cells_Trunk_AATCCTTGGCTT	6	Neural: 1
Cells_Trunk_ACGACCGGGTGA	17	Cathepsin+ cells: 4
Cells_Trunk_ATAACACCCGCN	7	Neoblast: 5
Cells_Trunk_GCCGCTACGGAA	21	Muscle: 7
Cells_Trunk_CTTCCTCATGGT	2	Epidermal: 3
Cells_Trunk_ACTGGTCGTTGG	17	Cathepsin+ cells: 15
Cells_Trunk_CAACTCGAGGAG	1	Epidermal: 3
Cells_Trunk_TGAACCGCTAGC	34	Parapharyngeal: 12
Cells_Trunk_TGGGCTTCCTCG	16	Muscle: 7
Cells_Trunk_GATACGATTTGG	40	Neural: 1
Cells_Trunk_TCACACCTCGTG	15	Cathepsin+ cells: 4
Cells_Trunk_AATAAACCGATA	17	Cathepsin+ cells: 15
Cells_Trunk_GGACGAGCCCTC	6	Neural: 1
Cells_Trunk_AGAGGCATGTAC	6	Neural: 1
Cells_Trunk_ACCATTAGCCGN	52	Epidermal: 35
Cells_Trunk_TTGGGTCACTTA	6	Neural: 1
Cells_Trunk_AAAGAAGAATGC	45	Cathepsin+ cells: 28
Cells_Trunk_TGTCGCGACATC	32	Parapharyngeal: 12
Cells_Trunk_CCTCCTCGCTGG	32	Neural: 1
Cells_Trunk_GACTGGGGAAAC	1	Epidermal: 3
Cells_Trunk_CGCGAGTCGCCN	27	Intestine: 19
Cells_Trunk_CCAACATGCGCA	6	Neural: 1
Cells_Trunk_ATCGTGGTAGCC	6	Neural: 1
Cells_Trunk_GCTGACAATGCG	6	Neural: 1
Cells_Trunk_CGACGAGTAAAT	11	Epidermal: 2
Cells_Trunk_GAACAGAGGTTC	18	Cathepsin+ cells: 10
Cells_Trunk_TATTATGTCAGN	1	Epidermal: 3
Cells_Trunk_GCCATAGGTGAG	17	Cathepsin+ cells: 15
Cells_Trunk_GGCGGCCATCTN	6	Neural: 1
Cells_Trunk_GGCGATGGGTAN	7	Neoblast: 5
Cells_Trunk_CACAGTAAGCGT	6	Neural: 1
Cells_Trunk_TGGCACTCTAAG	35	Epidermal: 24
Cells_Trunk_TCACAGTGCGGN	27	Intestine: 19
Cells_Trunk_TCTCGACCCCCN	15	Cathepsin+ cells: 4
Cells_Trunk_TAAATCGAAGTC	34	Parapharyngeal: 12
Cells_Trunk_TGCCAGGAGTGT	18	Cathepsin+ cells: 4
Cells_Trunk_CCGTACCTCTCN	20	Neural: 1
Cells_Trunk_GTCTCGGGACGT	20	Cathepsin+ cells: 4
Cells_Trunk_CCTTTGCGGAGC	7	Neoblast: 5
Cells_Trunk_GCTAACCCTTTG	3	Neural: 1
Cells_Trunk_TTCATTGTAATA	2	Epidermal: 3
Cells_Trunk_CATCGCCTATAT	5	Epidermal: 3
Cells_Trunk_GCGTTCGAGTTC	30	Epidermal: 3
Cells_Trunk_GCCTCCGATTCT	18	Cathepsin+ cells: 4
Cells_Trunk_TGCCCGACCCCG	5	Epidermal: 3
Cells_Trunk_GGCAGGGCATAA	5	Epidermal: 3
Cells_Trunk_ACTTGGAACGGG	7	Neoblast: 5
Cells_Trunk_ACACGGAGGGTA	2	Epidermal: 2
Cells_Trunk_CCGTGTCGTGGN	17	Cathepsin+ cells: 4
Cells_Trunk_CTCGAACAGCAT	41	Protonephridia: 40
Cells_Trunk_GCCATAGCCGGC	1	Epidermal: 3
Cells_Trunk_AAGGGTGAGAGG	24	Neoblast: 5
Cells_Trunk_ACGCTCCCACTA	7	Neural: 1
Cells_Trunk_AGGACCCACTGT	6	Neural: 1
Cells_Trunk_ATATAGGGTTTA	5	Epidermal: 3
Cells_Trunk_ATTCGGCCAGCA	1	Epidermal: 3
Cells_Trunk_AGACTCAAGGAN	1	Epidermal: 3
Cells_Trunk_GCTGCGATTTCN	32	Parapharyngeal: 12
Cells_Trunk_AACCTTAGGTCG	6	Neural: 1
Cells_Trunk_CCAGTCGGGGAA	5	Epidermal: 3
Cells_Trunk_ACGGGCCGGATG	5	Epidermal: 3
Cells_Trunk_AACCGGGTCGTA	52	Epidermal: 35
Cells_Trunk_AGCAGGTTAGCG	40	Parapharyngeal: 12
Cells_Trunk_CTCTACTCTAGN	14	Neoblast: 5
Cells_Trunk_TCTGAAATCGAA	55	Neural: 8
Cells_Trunk_TGCGAGTCCCAN	45	Cathepsin+ cells: 28
Cells_Trunk_GCACCATCATCN	6	Neural: 1
Cells_Trunk_TTAGTTGGCCCG	32	Parapharyngeal: 12
Cells_Trunk_ACAGTTAGCCCT	25	Cathepsin+ cells: 17
Cells_Trunk_CCAAGTTATTGN	7	Neoblast: 5
Cells_Trunk_CCATATCAACTT	5	Epidermal: 3
Cells_Trunk_GTGACGAGGGCG	25	Cathepsin+ cells: 17
Cells_Trunk_TTTCTAACCTTA	25	Cathepsin+ cells: 17
Cells_Trunk_TCTTCCACGACN	16	Muscle: 7
Cells_Trunk_GCTGTGCAGGTG	6	Epidermal: 3
Cells_Trunk_CTAACCAGGGCA	21	Muscle: 7
Cells_Trunk_GCTGTTCTGTAG	40	Parapharyngeal: 38
Cells_Trunk_CCGCTTAGGCCT	19	Neural: 23
Cells_Trunk_AACCGAGCTGTA	34	Parapharyngeal: 12
Cells_Trunk_GCAGGGTGGATT	52	Epidermal: 35
Cells_Trunk_GAAATTAGTTTN	5	Epidermal: 3
Cells_Trunk_TATGGCTCGCAG	15	Cathepsin+ cells: 4
Cells_Trunk_GCCCTGGCAAAA	7	Neoblast: 5
Cells_Trunk_GATGCGCGCCAN	17	Cathepsin+ cells: 15
Cells_Trunk_CCGCATAAACCG	30	Epidermal: 3
Cells_Trunk_TGTGTAGCGGTA	16	Muscle: 7
Cells_Trunk_GTTGGACTCGGC	6	Neural: 1
Cells_Trunk_TGATGGGCTTTA	6	Neural: 1
Cells_Trunk_TATGCAAATAGT	2	Epidermal: 3
Cells_Trunk_GTGCCAGGGAGC	30	Neoblast: 5
Cells_Trunk_TGGGTGATGCCT	40	Parapharyngeal: 38
Cells_Trunk_AGATGCATTGGN	16	Muscle: 7
Cells_Trunk_CATTTCAACTTT	13	Epidermal: 24
Cells_Trunk_ACCACCTGGCCC	6	Neoblast: 5
Cells_Trunk_CAATGAGGCCCN	30	Epidermal: 3
Cells_Trunk_CTTATAGAGATT	15	Cathepsin+ cells: 4
Cells_Trunk_CAATTGAGGCCC	5	Epidermal: 3
Cells_Trunk_GAGCCGGACTCT	7	Neoblast: 5
Cells_Trunk_ACGCACTAATCN	15	Cathepsin+ cells: 4
Cells_Trunk_ACGTATGGTTCA	5	Epidermal: 3
Cells_Trunk_CGGATAGAGTTG	16	Muscle: 7
Cells_Trunk_AGACTCAAGGGA	1	Epidermal: 3
Cells_Trunk_TATGTGAGCATA	6	Neural: 1
Cells_Trunk_CGTTATCAGTAC	45	Cathepsin+ cells: 28
Cells_Trunk_AAGCGTGCCTCG	2	Epidermal: 3
Cells_Trunk_ATTCAGCGCCAA	22	Cathepsin+ cells: 10
Cells_Trunk_AGCTTGTTATTG	6	Neural: 1
Cells_Trunk_TAGCTGCAGAAG	43	Parapharyngeal: 12
Cells_Trunk_ACTACGACGTTT	15	Cathepsin+ cells: 4
Cells_Trunk_ATCTCGGCTTGA	31	Intestine: 6
Cells_Trunk_TGGGTATGATGT	6	Neural: 1
Cells_Trunk_GACATGCCTACT	6	Pharynx: 25
Cells_Trunk_GGGTGCGTCTGT	31	Intestine: 6
Cells_Trunk_CGACCGTTTAGG	27	Intestine: 19
Cells_Trunk_ATGGGAGGACTA	36	Protonephridia: 26
Cells_Trunk_GTTGAAATAAAA	1	Epidermal: 3
Cells_Trunk_TCTTTGTAGTGG	6	Neural: 1
Cells_Trunk_ATTTGGACCCTT	16	Muscle: 7
Cells_Trunk_AATTAGAATAGT	20	Cathepsin+ cells: 4
Cells_Trunk_TACTGTCGGTCT	12	Intestine: 6
Cells_Trunk_TAGGAAGGAAGG	19	Neural: 23
Cells_Trunk_TATGCGTAGGGC	5	Epidermal: 3
Cells_Trunk_AGAGATAGTAAN	49	Neural: 36
Cells_Trunk_ACGTATTCGTCA	27	Intestine: 19
Cells_Trunk_CTAAACACGTAT	45	Cathepsin+ cells: 4
Cells_Trunk_AGCTCCATACAG	36	Protonephridia: 26
Cells_Trunk_ATTGAAGCATGN	1	Epidermal: 3
Cells_Trunk_ATGTTGGGCTAG	20	Cathepsin+ cells: 4
Cells_Trunk_GCACCCAACGGA	42	Intestine: 30
Cells_Trunk_GTGGTGTGTACC	33	Neural: 1
Cells_Trunk_GCCAGTAAAATT	15	Cathepsin+ cells: 4
Cells_Trunk_TAGGGTTGTTCT	15	Cathepsin+ cells: 4
Cells_Trunk_CCCAACGGCTAC	5	Epidermal: 3
Cells_Trunk_ATCCTAGTTACG	6	Epidermal: 3
Cells_Trunk_GAAGACGGTGCG	7	Neoblast: 5
Cells_Trunk_CGTTTTTAGGGN	30	Epidermal: 3
Cells_Trunk_CTGGTAGAGACA	6	Neural: 1
Cells_Trunk_TAGACGTATCAT	12	Intestine: 6
Cells_Trunk_TTAGAGGCGGGN	3	Neural: 1
Cells_Trunk_CTGTAATCATTC	15	Cathepsin+ cells: 4
Cells_Trunk_TTTTGCGTAGGN	29	Pharynx: 25
Cells_Trunk_TTGGGGTTCCTG	6	Neural: 1
Cells_Trunk_AGTGAGGGTTTN	3	Neural: 1
Cells_Trunk_TCTCTGGAAAAA	15	Cathepsin+ cells: 4
Cells_Trunk_AACGCGTAGTAG	6	Neural: 1
Cells_Trunk_GTCCGTAGACAT	6	Neural: 1
Cells_Trunk_GGTGGATTCATT	7	Neoblast: 5
Cells_Trunk_CTTACGCGAGCG	3	Neural: 1
Cells_Trunk_TGAGGAGGAGTG	7	Neoblast: 5
Cells_Trunk_ACCGCTTCCTGN	7	Neoblast: 5
Cells_Trunk_GAAAATGGGACN	29	Pharynx: 25
Cells_Trunk_CGCTGAGTCGCC	27	Intestine: 19
Cells_Trunk_CGCTCATGGTGG	51	Neural: 1
Cells_Trunk_CGCCGCAAGAGA	18	Cathepsin+ cells: 10
Cells_Trunk_ATCCCGCGCGTA	6	Neural: 1
Cells_Trunk_TATAATTTTGCA	1	Epidermal: 3
Cells_Trunk_GGGAAAATTCCA	47	Neural: 1
Cells_Trunk_GACCACCTTATA	7	Neoblast: 5
Cells_Trunk_GTCGGTAAATCN	2	Epidermal: 2
Cells_Trunk_CACACCTAGGCA	35	Epidermal: 24
Cells_Trunk_TGCCTTGGGGCA	20	Cathepsin+ cells: 4
Cells_Trunk_CTGGGAGTAGCN	12	Intestine: 6
Cells_Trunk_CGCATTCTCGGC	60	Neural: 1
Cells_Trunk_CGGTATGCGGAG	9	Neural: 8
Cells_Trunk_TTAATTCACAGN	32	Parapharyngeal: 12
Cells_Trunk_GCTGCACTGTTG	1	Epidermal: 3
Cells_Trunk_CGATGTAAAGCG	7	Neoblast: 5
Cells_Trunk_TATCCATAAACA	6	Neural: 1
Cells_Trunk_CCGACTTGGTTN	5	Epidermal: 3
Cells_Trunk_GCTGCTAACGAA	3	Neural: 1
Cells_Trunk_AAGCTGAGTAGA	15	Cathepsin+ cells: 4
Cells_Trunk_CCTACTGGTCTA	33	Neural: 18
Cells_Trunk_TAGATTACCCCN	53	Neural: 33
Cells_Trunk_CTAGCTGCGGGG	5	Epidermal: 3
Cells_Trunk_TAGATTGTTAGC	1	Epidermal: 3
Cells_Trunk_TGCTGAGCGCGT	2	Epidermal: 3
Cells_Trunk_TTCACATCCATG	5	Epidermal: 3
Cells_Trunk_TCTCAAGGGCTA	15	Cathepsin+ cells: 4
Cells_Trunk_CCGCGGACCGGT	15	Cathepsin+ cells: 4
Cells_Trunk_GGGAGAGAAGGT	16	Muscle: 7
Cells_Trunk_GTTGGGCTGTAT	15	Cathepsin+ cells: 4
Cells_Trunk_GACCGCTATGGN	15	Cathepsin+ cells: 4
Cells_Trunk_GGGCAGTTCTGG	5	Epidermal: 3
Cells_Trunk_GCGTTAAGAACC	15	Cathepsin+ cells: 4
Cells_Trunk_TAACCTAGAGGG	7	Neoblast: 5
Cells_Trunk_CGTGCGGTAGCA	22	Cathepsin+ cells: 10
Cells_Trunk_GGACACATATAN	56	Neural: 8
Cells_Trunk_CGGACATAACCG	6	Neural: 1
Cells_Trunk_ACCTTTAGTGGG	1	Epidermal: 3
Cells_Trunk_TTCCAAATGTAN	19	Neural: 20
Cells_Trunk_CAGCAGCCTACG	28	Muscle: 7
Cells_Trunk_GTGCGAGTAGCG	5	Epidermal: 3
Cells_Trunk_CCGAGCCATTAT	5	Epidermal: 3
Cells_Trunk_CGGAGGCCCCAA	6	Neural: 1
Cells_Trunk_CCCGCGTACTCT	25	Cathepsin+ cells: 17
Cells_Trunk_GTTTTATTGTAC	19	Neural: 20
Cells_Trunk_GCAACCATACTN	1	Epidermal: 3
Cells_Trunk_CGCCTCGTAATT	16	Muscle: 7
Cells_Trunk_GGGTGAGGGCAN	7	Neoblast: 5
Cells_Trunk_CAGGTCCTGATT	7	Neoblast: 5
Cells_Trunk_GGCCCTCTACCT	19	Neural: 20
Cells_Trunk_TAAACCTTTCCC	42	Intestine: 6
Cells_Trunk_TAAGTTTACTGA	6	Neural: 1
Cells_Trunk_GCAGCACTGAAC	60	Neural: 1
Cells_Trunk_GGTGTTGTGAAC	22	Cathepsin+ cells: 10
Cells_Trunk_TAGTCGCTGGGT	17	Cathepsin+ cells: 15
Cells_Trunk_ACAAAGGATCCG	29	Pharynx: 25
Cells_Trunk_GTAGGCCCGGGC	19	Neural: 20
Cells_Trunk_TGCGATGCGGCT	6	Neural: 1
Cells_Trunk_ATACCGGACGAT	5	Epidermal: 3
Cells_Trunk_CGGCGATCTGCN	7	Neoblast: 5
Cells_Trunk_TAGCCAATGGCA	15	Cathepsin+ cells: 4
Cells_Trunk_CCCTTAACCCGA	22	Cathepsin+ cells: 10
Cells_Trunk_AAAGCGCGGGGT	9	Neural: 8
Cells_Trunk_GAGACTCTAAAG	1	Epidermal: 3
Cells_Trunk_ACCCGATGCGAG	1	Epidermal: 3
Cells_Trunk_CCCCACACGCCA	25	Cathepsin+ cells: 15
Cells_Trunk_CACTAGCCACTT	35	Epidermal: 24
Cells_Trunk_GAGCCGACCACG	6	Neural: 1
Cells_Trunk_ACAGTGCACGTG	17	Cathepsin+ cells: 15
Cells_Trunk_CTGTGGCATTAA	1	Epidermal: 3
Cells_Trunk_GAAGTGAGGGTC	15	Cathepsin+ cells: 4
Cells_Trunk_GGCGACGCATCC	22	Cathepsin+ cells: 10
Cells_Trunk_AGCGGAGCAAAT	30	Neoblast: 5
Cells_Trunk_TGTATTTCGCCG	6	Neural: 1
Cells_Trunk_CGGATTAGTTGT	13	Epidermal: 24
Cells_Trunk_ACACGTCAGGGN	31	Intestine: 6
Cells_Trunk_AGCGCTGATAGT	5	Epidermal: 3
Cells_Trunk_GCGTTCGATTCN	7	Neoblast: 5
Cells_Trunk_GAGTGATCCGAA	5	Epidermal: 3
Cells_Trunk_TCAGCAGGTTGA	5	Epidermal: 3
Cells_Trunk_GCACGCCCATTG	25	Cathepsin+ cells: 15
Cells_Trunk_GGCTGCCAATGA	45	Cathepsin+ cells: 28
Cells_Trunk_GGGGTGGAAGCA	47	Neural: 1
Cells_Trunk_GCAATTCACTGA	7	Neoblast: 5
Cells_Trunk_CTGGACGCCCCA	17	Cathepsin+ cells: 15
Cells_Trunk_GGTCCAGGTGAT	19	Neural: 20
Cells_Trunk_AGTGGAGCTGTA	16	Muscle: 7
Cells_Trunk_GTCCGCGTGGCC	19	Neural: 20
Cells_Trunk_TCCGTCTACTAG	6	Neoblast: 5
Cells_Trunk_CTTAGGACTGAG	6	Neoblast: 5
Cells_Trunk_AGGTGGAGAACC	5	Epidermal: 3
Cells_Trunk_TCGCCGTATTCC	6	Neural: 1
Cells_Trunk_ACCTTTCGGAAA	32	Parapharyngeal: 12
Cells_Trunk_ATGCCTTTGCGA	6	Neoblast: 5
Cells_Trunk_AGGTTCGTAAAC	3	Neural: 1
Cells_Trunk_GCACTATCTTCG	6	Neural: 1
Cells_Trunk_ACAGTCCGCTGT	40	Parapharyngeal: 12
Cells_Trunk_AAGTTGGGACCN	15	Cathepsin+ cells: 4
Cells_Trunk_GGGCGGAACTGG	29	Pharynx: 25
Cells_Trunk_CGCCAAGACCGC	41	Protonephridia: 29
Cells_Trunk_GCTCTGTGCCAC	6	Neural: 1
Cells_Trunk_GATAGGGTGCTT	10	Neural: 21
Cells_Trunk_GCAGTACCACGA	50	Neural: 32
Cells_Trunk_TTGCAAGCACGA	7	Neoblast: 5
Cells_Trunk_TTCTAATCCGGN	22	Cathepsin+ cells: 10
Cells_Trunk_ATGAGAGTATTC	22	Cathepsin+ cells: 4
Cells_Trunk_AACCTTTAAGCT	3	Neural: 1
Cells_Trunk_CCCTACCTTCGG	6	Neoblast: 5
Cells_Trunk_AATTAGGCGGAT	25	Cathepsin+ cells: 17
Cells_Trunk_ATGGCCTCACTG	7	Neoblast: 5
Cells_Trunk_CGGGGCAACGAA	7	Neoblast: 5
Cells_Trunk_GGGTGTAGGGCA	7	Neoblast: 5
Cells_Trunk_CTGCCCCCTCGT	49	Neural: 36
Cells_Trunk_CTTAGCATACGA	22	Cathepsin+ cells: 10
Cells_Trunk_GGAACGACCCGA	19	Neural: 20
Cells_Trunk_CACTGCCAAGTG	1	Epidermal: 3
Cells_Trunk_AGAGCTTGACCG	19	Neural: 20
Cells_Trunk_TTTATACACCGG	35	Epidermal: 24
Cells_Trunk_GTGTTTTTAATT	19	Neural: 20
Cells_Trunk_GCGGCCAACTTA	30	Neoblast: 5
Cells_Trunk_GCGCGCACTGAT	15	Cathepsin+ cells: 4
Cells_PrePhar_GCTCATTGTTCG	12	Intestine: 6
Cells_PrePhar_AGCTAAGCTTAG	39	Epidermal: 2
Cells_PrePhar_GACATTTGACTT	0	Neoblast: 0
Cells_PrePhar_CAACTAATTTTN	14	Neoblast: 0
Cells_PrePhar_CTGAAATTTTTA	49	Neoblast: 0
Cells_PrePhar_CAGCATATTTCG	0	Neoblast: 0
Cells_PrePhar_AAGACCTTAATG	14	Neoblast: 0
Cells_PrePhar_TGACTTCGCTAA	0	Neoblast: 0
Cells_PrePhar_TTTCACTATATC	0	Neoblast: 0
Cells_PrePhar_TAGTGTTTTCCC	14	Neoblast: 0
Cells_PrePhar_CAGCCTGACGGA	24	Neoblast: 22
Cells_PrePhar_ACAATTCCTAGC	19	Neoblast: 0
Cells_PrePhar_CTGTCAAAAGCC	17	Cathepsin+ cells: 17
Cells_PrePhar_CCATTTTCTTTA	13	Epidermal: 11
Cells_PrePhar_GCCACAATAGCT	14	Neoblast: 0
Cells_PrePhar_GTAACGAATCGC	13	Epidermal: 11
Cells_PrePhar_AAACCTACAACG	14	Neoblast: 0
Cells_PrePhar_TCACTCTCTGAG	12	Intestine: 6
Cells_PrePhar_ATCACACCGTAG	14	Neoblast: 0
Cells_PrePhar_CGCCATGAACAA	14	Neoblast: 0
Cells_PrePhar_TAACCCAGATCA	14	Neoblast: 0
Cells_PrePhar_CGTCTGAATGCC	0	Neoblast: 0
Cells_PrePhar_TTCCAAGATCCG	24	Neoblast: 22
Cells_PrePhar_TGTTTCTGCCCC	39	Epidermal: 2
Cells_PrePhar_TTAGAAAGGTTA	11	Epidermal: 2
Cells_PrePhar_TAAATGTTGAGG	1	Epidermal: 2
Cells_PrePhar_CCTTGCATACCN	29	Neoblast: 0
Cells_PrePhar_GCCATATACAAN	2	Epidermal: 2
Cells_PrePhar_TTTAACGATTAN	25	Cathepsin+ cells: 17
Cells_PrePhar_CGCGCAAACCGT	0	Neoblast: 0
Cells_PrePhar_TTTCATAGCATC	0	Neoblast: 0
Cells_PrePhar_GTTTTACCTAAA	12	Intestine: 6
Cells_PrePhar_GTGGTGTCCGGA	0	Neoblast: 0
Cells_PrePhar_GCGTGGAAGATC	13	Epidermal: 11
Cells_PrePhar_GATGCCAATCCC	5	Epidermal: 3
Cells_PrePhar_ATGTCCGGAGTT	12	Intestine: 6
Cells_PrePhar_GAACATGATTTT	11	Epidermal: 2
Cells_PrePhar_TACAAAAGCAAT	0	Neoblast: 0
Cells_PrePhar_CCGTGTAATCAC	12	Intestine: 6
Cells_PrePhar_AATGAGCCTTAG	14	Neoblast: 0
Cells_PrePhar_GTATTGTTAGTT	0	Neoblast: 0
Cells_PrePhar_TATATCTGATTT	14	Neoblast: 0
Cells_PrePhar_TCTCCTTGGCTN	0	Neoblast: 0
Cells_PrePhar_TTTTCTAAACGC	0	Neoblast: 0
Cells_PrePhar_AAAGTAGTTGCC	0	Neoblast: 0
Cells_PrePhar_CCATCAGGATAN	2	Epidermal: 2
Cells_PrePhar_CTACCTATCGAC	2	Epidermal: 2
Cells_PrePhar_ATTATTAGTTTC	0	Neoblast: 0
Cells_PrePhar_AGCAGTGGATTT	18	Cathepsin+ cells: 10
Cells_PrePhar_CGAAGACTAGTG	0	Neoblast: 0
Cells_PrePhar_CTGTGCGATCTC	14	Neoblast: 0
Cells_PrePhar_AAATCGGATACG	0	Neoblast: 0
Cells_PrePhar_TTTTTGGCGAAG	12	Intestine: 6
Cells_PrePhar_GCGGCTTCAAGC	14	Neoblast: 0
Cells_PrePhar_CCCTCAACTTCC	0	Neoblast: 0
Cells_PrePhar_TTTGTGATCGTA	12	Intestine: 6
Cells_PrePhar_CCATAATTCCAC	0	Neoblast: 0
Cells_PrePhar_CAACTAAAACTC	4	Neoblast: 0
Cells_PrePhar_AATCAATGTTAC	24	Neoblast: 22
Cells_PrePhar_TCCCGCGCAGTG	61	Cathepsin+ cells: 4
Cells_PrePhar_CAACCTAGTTGN	24	Neoblast: 0
Cells_PrePhar_TAAGTGACTACT	12	Intestine: 6
Cells_PrePhar_CACTCTTCGCCA	2	Epidermal: 2
Cells_PrePhar_CCATTTTCAAAG	24	Neoblast: 22
Cells_PrePhar_CACCTGGCTTTG	14	Neoblast: 0
Cells_PrePhar_AACCCGTCACCG	14	Neoblast: 0
Cells_PrePhar_AGTAAGAAGGTA	0	Neoblast: 0
Cells_PrePhar_CCTGATGTTATT	0	Neoblast: 0
Cells_PrePhar_ATTTTCAGAGCC	0	Neoblast: 0
Cells_PrePhar_CTGATATCCTCN	4	Neoblast: 0
Cells_PrePhar_ACGACTGGTTGG	12	Intestine: 6
Cells_PrePhar_ATCTGAACCTGT	24	Neoblast: 22
Cells_PrePhar_GCTTACAGGTGT	12	Intestine: 6
Cells_PrePhar_AACCAAATTGTG	30	Epidermal: 3
Cells_PrePhar_GACCCGATCATG	18	Cathepsin+ cells: 10
Cells_PrePhar_AATCGGCATATG	12	Intestine: 6
Cells_PrePhar_AATACTCGCGCT	0	Neoblast: 0
Cells_PrePhar_TGTCCTAGCAAG	14	Neoblast: 0
Cells_PrePhar_TATTCAGAGGCG	0	Neoblast: 0
Cells_PrePhar_GTTAGTGCTAAT	12	Intestine: 6
Cells_PrePhar_GACGCACCCCAG	11	Epidermal: 2
Cells_PrePhar_ATCACAATATAN	11	Epidermal: 2
Cells_PrePhar_ACTCCATTTCAA	12	Intestine: 6
Cells_PrePhar_CTGATAACGTTC	0	Neoblast: 0
Cells_PrePhar_AGAGCGAATTTT	0	Neoblast: 0
Cells_PrePhar_CCATAGCTGATT	0	Neoblast: 0
Cells_PrePhar_CGTATTTAATAG	29	Pharynx: 25
Cells_PrePhar_CCATCCCTGTAT	0	Neoblast: 0
Cells_PrePhar_CGCATAAAATTT	2	Epidermal: 2
Cells_PrePhar_GGTCATACTCGA	0	Neoblast: 0
Cells_PrePhar_GAGCAAAACCTT	14	Neoblast: 0
Cells_PrePhar_CCCTGCGACTTG	0	Neoblast: 0
Cells_PrePhar_CATGGGGTGATN	0	Neoblast: 0
Cells_PrePhar_CGCATATACCTT	5	Epidermal: 3
Cells_PrePhar_GCTTATTAATTT	24	Neoblast: 22
Cells_PrePhar_CCGGGTCCGGTN	0	Neoblast: 0
Cells_PrePhar_GCCGGAGGATCG	0	Neoblast: 0
Cells_PrePhar_GCATCCAGCCCT	12	Intestine: 6
Cells_PrePhar_AACAAGCCTGGN	14	Neoblast: 0
Cells_PrePhar_GTTAGAAAACGA	15	Cathepsin+ cells: 4
Cells_PrePhar_TCCCCTTATCCG	39	Epidermal: 11
Cells_PrePhar_TTACCTGGCCCT	16	Muscle: 7
Cells_PrePhar_GATAGACCCTAC	45	Cathepsin+ cells: 28
Cells_PrePhar_CCGTCCACAGCC	39	Epidermal: 11
Cells_PrePhar_TTACACACTGTC	42	Intestine: 30
Cells_PrePhar_ACCGTTTCAGTT	5	Epidermal: 3
Cells_PrePhar_CTTACCGTATGA	0	Neoblast: 0
Cells_PrePhar_GGACACTCCTTG	0	Neoblast: 0
Cells_PrePhar_AACTCCTCGCTN	0	Neoblast: 0
Cells_PrePhar_TAACCCTGGCCA	0	Neoblast: 0
Cells_PrePhar_GTACAAGATGAA	13	Epidermal: 11
Cells_PrePhar_GACCCCGCTATC	32	Neoblast: 0
Cells_PrePhar_ATGCCTACAGAA	0	Neoblast: 0
Cells_PrePhar_GCTTTTAAACTT	18	Cathepsin+ cells: 10
Cells_PrePhar_ACAGTAGTGCTT	14	Neoblast: 0
Cells_PrePhar_GTTCAACGAGAT	0	Neoblast: 0
Cells_PrePhar_AATAAGGTGAGT	14	Neoblast: 0
Cells_PrePhar_AGCGTTTACAAT	4	Neoblast: 0
Cells_PrePhar_AGAAGCAGAATT	0	Neoblast: 0
Cells_PrePhar_CGACAATGTCTA	5	Epidermal: 2
Cells_PrePhar_TGGCTCCTGAGT	12	Intestine: 6
Cells_PrePhar_CACCGATTAGAT	0	Neoblast: 0
Cells_PrePhar_GAATGTATCCTN	0	Neoblast: 0
Cells_PrePhar_GGCTCCGCTTGN	12	Intestine: 6
Cells_PrePhar_GGTATGACATTA	13	Epidermal: 11
Cells_PrePhar_CGCTCGCGAGAG	12	Intestine: 6
Cells_PrePhar_TTAATTTCCGCA	12	Intestine: 6
Cells_PrePhar_CCCAATGCGACG	0	Neoblast: 0
Cells_PrePhar_GCTCTCTAGTGT	39	Epidermal: 11
Cells_PrePhar_TAGCTCCGCCTC	12	Intestine: 6
Cells_PrePhar_TCAACCGTCGTN	12	Intestine: 6
Cells_PrePhar_GATTTCACCTTC	1	Epidermal: 2
Cells_PrePhar_GGTGTACAAGGC	1	Epidermal: 3
Cells_PrePhar_TGTCCATAAATC	12	Intestine: 6
Cells_PrePhar_TACATACGGACC	39	Epidermal: 11
Cells_PrePhar_CGTCAACCTGCN	24	Neoblast: 22
Cells_PrePhar_GATTACATATGT	14	Neoblast: 0
Cells_PrePhar_GCCATCGGATAA	49	Neoblast: 0
Cells_PrePhar_AACTATGCTTTT	11	Epidermal: 2
Cells_PrePhar_CCCGAGCGCAAG	0	Neoblast: 0
Cells_PrePhar_TATGAAAGGAGA	27	Intestine: 19
Cells_PrePhar_CGTTAGATTTTT	45	Cathepsin+ cells: 28
Cells_PrePhar_TCAAACTAGGTA	18	Cathepsin+ cells: 4
Cells_PrePhar_AGCAGATTAAAT	12	Intestine: 6
Cells_PrePhar_TAAGCTCCAGAC	0	Neoblast: 0
Cells_PrePhar_CCTACTGTATAG	14	Neoblast: 0
Cells_PrePhar_AGACAAAGCTCN	0	Neoblast: 0
Cells_PrePhar_TCACCAATAGCT	13	Epidermal: 11
Cells_PrePhar_CTCGGTCAAATG	18	Cathepsin+ cells: 10
Cells_PrePhar_ATGCAATCTGAA	2	Epidermal: 2
Cells_PrePhar_CCTAATAGACAA	0	Neoblast: 0
Cells_PrePhar_CATTTCGAAAAG	0	Neoblast: 0
Cells_PrePhar_TAGTCCACTATT	14	Neoblast: 0
Cells_PrePhar_GAAGGATTGCTC	31	Intestine: 6
Cells_PrePhar_ATATCCTCACTN	1	Epidermal: 2
Cells_PrePhar_CACAATCACACT	22	Cathepsin+ cells: 10
Cells_PrePhar_CTCAAGCGGTCA	24	Neoblast: 22
Cells_PrePhar_AGTAGCTGCCAA	0	Neoblast: 0
Cells_PrePhar_GGCGCGATCTGA	12	Intestine: 6
Cells_PrePhar_GAAGCTCAGGAA	2	Epidermal: 2
Cells_PrePhar_GCCCGCTGGTCT	12	Intestine: 6
Cells_PrePhar_ATCTAGAATTTG	21	Muscle: 7
Cells_PrePhar_CTGTTATGCCGA	18	Cathepsin+ cells: 4
Cells_PrePhar_GCCGTTATAGCT	31	Intestine: 6
Cells_PrePhar_AAGGCGTACGAA	0	Neoblast: 0
Cells_PrePhar_GACGTTTTGCGN	12	Intestine: 6
Cells_PrePhar_ATCCTAGAGCCT	12	Intestine: 6
Cells_PrePhar_CACGGGAGCTAT	0	Neoblast: 0
Cells_PrePhar_TTCGGATACCCC	0	Neoblast: 0
Cells_PrePhar_CTACTCGTTTAT	32	Parapharyngeal: 12
Cells_PrePhar_TTCAGCGTGAAT	0	Neoblast: 0
Cells_PrePhar_CCGCATTAGCAA	2	Epidermal: 2
Cells_PrePhar_GCTTGACACGGA	0	Neoblast: 0
Cells_PrePhar_GAATAGAAGATC	20	Cathepsin+ cells: 4
Cells_PrePhar_CGCGCAGTCGCT	4	Neoblast: 0
Cells_PrePhar_AGCGAGTGGTGC	0	Neoblast: 0
Cells_PrePhar_GAGACATCACAG	0	Neoblast: 0
Cells_PrePhar_CCTGAATCGCCA	24	Neoblast: 0
Cells_PrePhar_CGGCCGGAGGCG	29	Pharynx: 25
Cells_PrePhar_GCACAAATCAAN	5	Epidermal: 3
Cells_PrePhar_TGACGTGTTACA	15	Cathepsin+ cells: 4
Cells_PrePhar_CTCCTTAGCTCG	0	Neoblast: 0
Cells_PrePhar_TAAAATTAGGTA	24	Neoblast: 22
Cells_PrePhar_ATACGGACTTCA	30	Epidermal: 3
Cells_PrePhar_CGTCATTTGGAT	12	Intestine: 6
Cells_PrePhar_CAAGTGGACTGA	11	Epidermal: 2
Cells_PrePhar_CTACGGCATCTT	0	Neoblast: 0
Cells_PrePhar_TAGAACGGAACA	0	Neoblast: 0
Cells_PrePhar_TTTCCTATACGN	0	Neoblast: 0
Cells_PrePhar_GCTTCTCTCAAA	12	Intestine: 6
Cells_PrePhar_CAACCCCCTGGT	11	Epidermal: 2
Cells_PrePhar_GCAGCTTGTCGT	17	Cathepsin+ cells: 4
Cells_PrePhar_CCTGTTGCATCT	14	Neoblast: 0
Cells_PrePhar_TCAAAACGTAAC	2	Epidermal: 2
Cells_PrePhar_CTTTCAATCGGC	0	Neoblast: 0
Cells_PrePhar_TATCGTAGCGGT	14	Neoblast: 0
Cells_PrePhar_TAACTGACAACT	17	Cathepsin+ cells: 15
Cells_PrePhar_GTTAATGAAATT	5	Epidermal: 3
Cells_PrePhar_TGGCCGGAATCC	0	Neoblast: 0
Cells_PrePhar_TGTACATTGTAG	0	Neoblast: 0
Cells_PrePhar_AACATGCTTACA	1	Epidermal: 2
Cells_PrePhar_CGGTTCGCCCAN	22	Cathepsin+ cells: 10
Cells_PrePhar_GCGTTAAAGGTT	14	Neoblast: 0
Cells_PrePhar_GAGTTTATGTTG	4	Neoblast: 0
Cells_PrePhar_TGTAGTGTGGTG	2	Epidermal: 2
Cells_PrePhar_CCCAGCGGTGAT	14	Neoblast: 0
Cells_PrePhar_ATTTTCATTCAC	0	Neoblast: 0
Cells_PrePhar_ACACCGATGACA	12	Intestine: 6
Cells_PrePhar_TGCACATCAATA	14	Neoblast: 0
Cells_PrePhar_AACCCTCTCGTC	15	Cathepsin+ cells: 4
Cells_PrePhar_CAGTGGGATCTG	12	Intestine: 6
Cells_PrePhar_CTCGCTGTCCTA	2	Epidermal: 2
Cells_PrePhar_TGCCTTCTTTCC	2	Epidermal: 2
Cells_PrePhar_CCTATGACGAAC	1	Epidermal: 2
Cells_PrePhar_CAGACCGAGCTC	0	Neoblast: 0
Cells_PrePhar_ATCCTATCAATA	0	Neoblast: 0
Cells_PrePhar_CTCATTCCCAAG	2	Epidermal: 2
Cells_PrePhar_GCGAAACTCGCC	0	Neoblast: 0
Cells_PrePhar_GCCGTCACCTAG	1	Epidermal: 2
Cells_PrePhar_AACCTAAACCAA	2	Epidermal: 2
Cells_PrePhar_AGTTCGGAGCGA	0	Neoblast: 0
Cells_PrePhar_AAGACAAGACTT	1	Epidermal: 2
Cells_PrePhar_AAATGAAGTCAN	45	Cathepsin+ cells: 28
Cells_PrePhar_CCAGTTTGGCCT	32	Parapharyngeal: 12
Cells_PrePhar_ATTCAGTGATTA	4	Neoblast: 0
Cells_PrePhar_GCCCCACTAGAA	12	Intestine: 6
Cells_PrePhar_CAACTGCTCCCT	13	Epidermal: 11
Cells_PrePhar_TAGCACTCCGGA	18	Cathepsin+ cells: 4
Cells_PrePhar_TGGCATTTGAAN	0	Neoblast: 0
Cells_PrePhar_CGCCTAAGTTAA	1	Epidermal: 2
Cells_PrePhar_TGACTGTGATCG	4	Neoblast: 0
Cells_PrePhar_GAATGGCTTGCC	1	Epidermal: 2
Cells_PrePhar_AAGTCCGCTGAT	24	Neoblast: 22
Cells_PrePhar_ACTATATGCTAT	0	Neoblast: 0
Cells_PrePhar_CTGTGATGGTCC	0	Neoblast: 0
Cells_PrePhar_TCGTATATATCA	4	Neoblast: 0
Cells_PrePhar_GAGAAGCCCTCA	0	Neoblast: 0
Cells_PrePhar_TATTCCAGGTTN	2	Epidermal: 2
Cells_PrePhar_TAGGCCTAAGGA	12	Intestine: 6
Cells_PrePhar_GACCTTCATATT	52	Epidermal: 35
Cells_PrePhar_TGCTCGGCGCAA	24	Neoblast: 22
Cells_PrePhar_CTCCGATCGTCN	0	Neoblast: 0
Cells_PrePhar_GACCCGCACCCT	4	Neoblast: 0
Cells_PrePhar_ATGAACCCAGAT	11	Epidermal: 2
Cells_PrePhar_TCCCAGCGATTA	24	Neoblast: 22
Cells_PrePhar_CATCGTAACCGA	27	Intestine: 19
Cells_PrePhar_GTAGTCAACCCT	25	Cathepsin+ cells: 17
Cells_PrePhar_TATGTACTTGGA	5	Epidermal: 3
Cells_PrePhar_TGGCCAGATGCG	24	Neoblast: 22
Cells_PrePhar_CATATCGACATN	12	Intestine: 6
Cells_PrePhar_ACGTGAAATGGT	2	Epidermal: 2
Cells_PrePhar_AACACGATATAC	30	Cathepsin+ cells: 4
Cells_PrePhar_TACGTCAATTAG	24	Neoblast: 22
Cells_PrePhar_CTGGTCCTGGAT	0	Neoblast: 0
Cells_PrePhar_CTTACTTCCATA	0	Neoblast: 0
Cells_PrePhar_CAGTTCATAGGT	14	Neoblast: 0
Cells_PrePhar_CAACACTATTAA	18	Cathepsin+ cells: 10
Cells_PrePhar_GCATATGTATCA	17	Cathepsin+ cells: 17
Cells_PrePhar_GTTGGGCATAGC	4	Neoblast: 0
Cells_PrePhar_GACTTATAGTTC	31	Intestine: 6
Cells_PrePhar_TTGGGAACTATT	0	Neoblast: 0
Cells_PrePhar_ACTTTGGAGGTT	1	Epidermal: 2
Cells_PrePhar_AACCGGTTTATC	11	Epidermal: 2
Cells_PrePhar_TAGTTGTATGAC	0	Neoblast: 0
Cells_PrePhar_GCAAGTTCAGAT	5	Epidermal: 3
Cells_PrePhar_TCGCCACTCACN	12	Intestine: 6
Cells_PrePhar_GCTACCCGCAAT	2	Epidermal: 2
Cells_PrePhar_CGGACAGAATTG	13	Epidermal: 11
Cells_PrePhar_CCAGCATGACCN	30	Epidermal: 3
Cells_PrePhar_CGATGTAGAATC	14	Neoblast: 0
Cells_PrePhar_TATTGACTTAGA	20	Cathepsin+ cells: 4
Cells_PrePhar_TCTTCTGTATTA	0	Neoblast: 0
Cells_PrePhar_CCCGCTGGTTCT	14	Neoblast: 0
Cells_PrePhar_CTCCCATCGTGC	2	Epidermal: 2
Cells_PrePhar_AAATCTCATACA	5	Epidermal: 3
Cells_PrePhar_CATCGCAAAGTA	0	Neoblast: 0
Cells_PrePhar_TTCTATGCAATN	20	Cathepsin+ cells: 4
Cells_PrePhar_TGGTGGTCCTCC	0	Neoblast: 0
Cells_PrePhar_CCGAAGTCATTA	16	Muscle: 7
Cells_PrePhar_CTTTCGAGGTAC	42	Intestine: 30
Cells_PrePhar_TAGGGAGAGGTC	22	Cathepsin+ cells: 10
Cells_PrePhar_AGATTCACAAGG	0	Neoblast: 0
Cells_PrePhar_CGAAGCCACGAG	0	Neoblast: 0
Cells_PrePhar_AACCGTAATATA	4	Neoblast: 0
Cells_PrePhar_CCAGAAGATTGN	13	Epidermal: 11
Cells_PrePhar_GGCGTCGCGATC	24	Neoblast: 22
Cells_PrePhar_CCGTAACGTGCT	4	Neoblast: 0
Cells_PrePhar_CCGGATGTGCTC	0	Neoblast: 0
Cells_PrePhar_CATATAGATGCT	18	Cathepsin+ cells: 4
Cells_PrePhar_AGAGCAACTAAG	11	Epidermal: 2
Cells_PrePhar_CGTGAATATACA	32	Neoblast: 0
Cells_PrePhar_CAGACATTTAAC	1	Epidermal: 2
Cells_PrePhar_GCAGGGCGGCCT	12	Intestine: 6
Cells_PrePhar_AGGCCAAACATA	24	Neoblast: 22
Cells_PrePhar_TATCCTATTGAT	18	Cathepsin+ cells: 4
Cells_PrePhar_TTACTTCCACCT	11	Epidermal: 2
Cells_PrePhar_GACATGCTCTAT	2	Epidermal: 2
Cells_PrePhar_TCAGCATTGTTG	0	Neoblast: 0
Cells_PrePhar_TATTGGCAGACG	12	Intestine: 6
Cells_PrePhar_TCCGCTACGACC	0	Neoblast: 0
Cells_PrePhar_ACCTAGCGAACA	12	Intestine: 6
Cells_PrePhar_GGTAAGCAATTT	2	Epidermal: 2
Cells_PrePhar_TAAATGTCTTCN	2	Epidermal: 2
Cells_PrePhar_TTCCGGGCGGTA	0	Neoblast: 0
Cells_PrePhar_GTCGGAACCTAC	4	Neoblast: 0
Cells_PrePhar_CAAAATCCCAAG	5	Epidermal: 3
Cells_PrePhar_CTTCGTCGGTCA	12	Intestine: 6
Cells_PrePhar_GCGCGTAGTAGT	1	Epidermal: 2
Cells_PrePhar_GCCCAACGATGA	14	Neoblast: 0
Cells_PrePhar_GCTTGGCTCTCG	50	Neural: 32
Cells_PrePhar_TGCCGATGAAAT	0	Neoblast: 0
Cells_PrePhar_GTTCACATTACN	12	Intestine: 6
Cells_PrePhar_CGTGGAATAGAT	18	Cathepsin+ cells: 10
Cells_PrePhar_TAATGATTTCGA	18	Cathepsin+ cells: 4
Cells_PrePhar_GTCGCGGATGTC	29	Pharynx: 25
Cells_PrePhar_TCATTTTGGATA	18	Cathepsin+ cells: 4
Cells_PrePhar_GTCCCCTAAATA	18	Cathepsin+ cells: 4
Cells_PrePhar_GCGACTAGACGC	1	Epidermal: 2
Cells_PrePhar_ACGCCATGGATG	18	Cathepsin+ cells: 10
[truncated: 48,563 more rows]

## Sheet: Schistosoma mansoni
Cell name	Leiden cluster	Cell type
YX_1009901001_A10	0	Muscle
YX_1009901001_A11	29	Neoblast
YX_1009901001_A12	4	Neoblast
YX_1009901001_A13	15	Neoblast
YX_1009901001_A14	16	Epidermal2
YX_1009901001_A15	4	Neoblast
YX_1009901001_A16	4	Neoblast
YX_1009901001_A19	41	Muscle
YX_1009901001_A20	26	Neoblast
YX_1009901001_A22	25	Neoblast
YX_1009901001_A23	18	Neural
YX_1009901001_A24	17	Muscle
YX_1009901001_A3	19	Neural
YX_1009901001_A5	23	Epidermal_prog1
YX_1009901001_A7	2	Cathepsin
YX_1009901001_A9	2	Cathepsin
YX_1009901001_B10	35	Parenchymal
YX_1009901001_B11	30	Neoblast
YX_1009901001_B15	18	Neural
YX_1009901001_B16	6	Muscle
YX_1009901001_B17	9	Muscle
YX_1009901001_B18	35	Neural
YX_1009901001_B19	4	Neoblast
YX_1009901001_B2	13	Muscle
YX_1009901001_B20	0	Muscle
YX_1009901001_B21	15	Neoblast
YX_1009901001_B22	2	Cathepsin
YX_1009901001_B23	22	Muscle
YX_1009901001_B24	46	Parenchymal
YX_1009901001_B3	23	Epidermal_prog1
YX_1009901001_B4	16	Epidermal1
YX_1009901001_B5	35	Neural
YX_1009901001_B6	2	Parenchymal
YX_1009901001_B7	8	Epidermal_prog3
YX_1009901001_B8	12	Muscle
YX_1009901001_B9	13	Muscle
YX_1009901001_C1	1	Neoblast
YX_1009901001_C10	4	Neoblast
YX_1009901001_C11	19	Neural
YX_1009901001_C12	26	Neoblast
YX_1009901001_C13	3	Parenchymal
YX_1009901001_C14	18	Neural
YX_1009901001_C19	6	Muscle
YX_1009901001_C2	19	Neural
YX_1009901001_C20	5	Cathepsin
YX_1009901001_C21	15	Neoblast
YX_1009901001_C22	7	Neural
YX_1009901001_C23	29	Neoblast
YX_1009901001_C24	35	Neural
YX_1009901001_C3	3	Parenchymal
YX_1009901001_C4	13	Muscle
YX_1009901001_C5	4	Neoblast
YX_1009901001_C6	7	Neural
YX_1009901001_C7	29	Neoblast
YX_1009901001_C8	14	Neural
YX_1009901001_C9	21	Parenchymal
YX_1009901001_D1	38	Muscle
YX_1009901001_D11	18	Neural
YX_1009901001_D12	20	Neural
YX_1009901001_D13	17	Neural
YX_1009901001_D14	0	Muscle
YX_1009901001_D15	6	Muscle
YX_1009901001_D16	1	Neoblast
YX_1009901001_D17	7	Neural
YX_1009901001_D19	15	Neoblast
YX_1009901001_D2	0	Muscle
YX_1009901001_D20	2	Cathepsin
YX_1009901001_D21	42	Neural
YX_1009901001_D22	9	Muscle
YX_1009901001_D23	9	Muscle
YX_1009901001_D3	12	Muscle
YX_1009901001_D4	0	Muscle
YX_1009901001_D5	5	Cathepsin
YX_1009901001_D6	23	Epidermal_prog1
YX_1009901001_D9	33	Neoblast
YX_1009901001_E11	35	Neural
YX_1009901001_E12	8	Epidermal_prog3
YX_1009901001_E13	2	Cathepsin
YX_1009901001_E14	19	Neural
YX_1009901001_E16	15	Neoblast
YX_1009901001_E17	8	Epidermal_prog3
YX_1009901001_E19	17	Parenchymal
YX_1009901001_E2	8	Epidermal_prog3
YX_1009901001_E21	13	Muscle
YX_1009901001_E23	10	Muscle
YX_1009901001_E24	6	Muscle
YX_1009901001_E4	21	Parenchymal
YX_1009901001_E5	2	Cathepsin
YX_1009901001_E7	1	Neoblast
YX_1009901001_E9	24	Parenchymal
YX_1009901001_F1	39	Muscle
YX_1009901001_F10	17	Parenchymal
YX_1009901001_F12	1	Neoblast
YX_1009901001_F14	10	Muscle
YX_1009901001_F15	15	Neoblast
YX_1009901001_F16	28	Neural
YX_1009901001_F18	13	Muscle
YX_1009901001_F2	2	Cathepsin
YX_1009901001_F20	0	Muscle
YX_1009901001_F21	14	Neural
YX_1009901001_F22	13	Muscle
YX_1009901001_F3	3	Parenchymal
YX_1009901001_F5	5	Cathepsin
YX_1009901001_F6	28	Neural
YX_1009901001_F7	22	Muscle
YX_1009901001_F8	11	Parenchymal
YX_1009901001_F9	17	Neural
YX_1009901001_G1	6	Muscle
YX_1009901001_G11	1	Neoblast
YX_1009901001_G12	4	Neoblast
YX_1009901001_G13	12	Muscle
YX_1009901001_G14	9	Muscle
YX_1009901001_G15	24	Epidermal_prog2
YX_1009901001_G16	6	Muscle
YX_1009901001_G18	0	Muscle
YX_1009901001_G2	15	Neoblast
YX_1009901001_G24	20	Neural
YX_1009901001_G4	2	Cathepsin
YX_1009901001_G5	2	Cathepsin
YX_1009901001_G6	8	Epidermal_prog2
YX_1009901001_G7	9	Muscle
YX_1009901001_G8	42	Neural
YX_1009901001_G9	26	Neoblast
YX_1009901001_H1	14	Neural
YX_1009901001_H10	12	Muscle
YX_1009901001_H11	35	Parenchymal
YX_1009901001_H12	14	Neural
YX_1009901001_H13	31	Parenchymal
YX_1009901001_H14	4	Neoblast
YX_1009901001_H15	32	Intestine
YX_1009901001_H16	31	Parenchymal
YX_1009901001_H17	22	Muscle
YX_1009901001_H18	19	Parenchymal
YX_1009901001_H19	44	Neural
YX_1009901001_H2	6	Muscle
YX_1009901001_H20	12	Muscle
YX_1009901001_H22	26	Neoblast
YX_1009901001_H24	23	Epidermal_prog1
YX_1009901001_H3	29	Neoblast
YX_1009901001_H4	8	Epidermal_prog2
YX_1009901001_H5	23	Epidermal_prog1
YX_1009901001_H6	28	Neural
YX_1009901001_H7	20	Neural
YX_1009901001_H8	12	Muscle
YX_1009901001_H9	17	Epidermal_prog1
YX_1009901001_I1	7	Neural
YX_1009901001_I10	1	Neoblast
YX_1009901001_I12	20	Neural
YX_1009901001_I13	3	Parenchymal
YX_1009901001_I14	3	Parenchymal
YX_1009901001_I15	9	Muscle
YX_1009901001_I18	29	Neoblast
YX_1009901001_I19	0	Muscle
YX_1009901001_I2	21	Parenchymal
YX_1009901001_I20	24	Parenchymal
YX_1009901001_I21	27	Neoblast
YX_1009901001_I22	1	Neoblast
YX_1009901001_I23	37	Cathepsin
YX_1009901001_I3	15	Neoblast
YX_1009901001_I4	3	Parenchymal
YX_1009901001_I6	5	Neural
YX_1009901001_I8	2	Cathepsin
YX_1009901001_I9	40	Neural
YX_1009901001_J1	42	Neural
YX_1009901001_J10	21	Parenchymal
YX_1009901001_J11	23	Epidermal_prog1
YX_1009901001_J12	1	Neoblast
YX_1009901001_J13	7	Neural
YX_1009901001_J14	2	Cathepsin
YX_1009901001_J17	14	Neural
YX_1009901001_J18	26	Neoblast
YX_1009901001_J19	24	Epidermal_prog2
YX_1009901001_J2	29	Neoblast
YX_1009901001_J21	9	Muscle
YX_1009901001_J22	27	Neoblast
YX_1009901001_J23	28	Neural
YX_1009901001_J24	21	Parenchymal
YX_1009901001_J3	6	Muscle
YX_1009901001_J4	17	Neural
YX_1009901001_J5	1	Neoblast
YX_1009901001_J7	19	Neural
YX_1009901001_J9	11	Parenchymal
YX_1009901001_K1	0	Muscle
YX_1009901001_K10	4	Neoblast
YX_1009901001_K11	8	Epidermal_prog3
YX_1009901001_K12	13	Muscle
YX_1009901001_K13	0	Muscle
YX_1009901001_K14	14	Neural
YX_1009901001_K18	30	Neoblast
YX_1009901001_K2	20	Neural
YX_1009901001_K20	4	Neoblast
YX_1009901001_K21	28	Neural
YX_1009901001_K23	12	Muscle
YX_1009901001_K24	9	Muscle
YX_1009901001_K3	0	Muscle
YX_1009901001_K6	0	Muscle
YX_1009901001_K7	7	Neural
YX_1009901001_K9	15	Neoblast
YX_1009901001_L1	20	Neural
YX_1009901001_L10	26	Neoblast
YX_1009901001_L11	7	Neural
YX_1009901001_L12	6	Muscle
YX_1009901001_L13	10	Muscle
YX_1009901001_L14	8	Epidermal_prog3
YX_1009901001_L15	29	Neoblast
YX_1009901001_L17	32	Neoblast
YX_1009901001_L18	21	Parenchymal
YX_1009901001_L19	5	Cathepsin
YX_1009901001_L2	35	Neural
YX_1009901001_L20	20	Neural
YX_1009901001_L23	28	Neural
YX_1009901001_L24	32	Intestine
YX_1009901001_L3	4	Neoblast
YX_1009901001_L4	10	Muscle
YX_1009901001_L5	0	Muscle
YX_1009901001_L7	15	Neoblast
YX_1009901001_L8	34	Neural
YX_1009901001_L9	0	Muscle
YX_1009901001_M1	6	Muscle
YX_1009901001_M10	11	Parenchymal
YX_1009901001_M12	39	Parenchymal
YX_1009901001_M13	42	Neural
YX_1009901001_M14	1	Neoblast
YX_1009901001_M15	1	Neoblast
YX_1009901001_M16	12	Muscle
YX_1009901001_M17	29	Muscle
YX_1009901001_M18	22	Muscle
YX_1009901001_M19	21	Parenchymal
YX_1009901001_M2	1	Neoblast
YX_1009901001_M20	6	Muscle
YX_1009901001_M21	30	Neoblast
YX_1009901001_M22	25	Neoblast
YX_1009901001_M24	47	Parenchymal
YX_1009901001_M3	16	Neural
YX_1009901001_M5	31	Neural
YX_1009901001_M8	12	Muscle
YX_1009901001_M9	5	Cathepsin
YX_1009901001_N10	23	Epidermal_prog1
YX_1009901001_N14	20	Neural
YX_1009901001_N15	17	Parenchymal
YX_1009901001_N16	27	Neoblast
YX_1009901001_N18	14	Neural
YX_1009901001_N19	43	Flame cells
YX_1009901001_N20	36	Neural
YX_1009901001_N21	1	Neoblast
YX_1009901001_N22	6	Muscle
YX_1009901001_N23	22	Muscle
YX_1009901001_N24	26	Neoblast
YX_1009901001_N4	36	Neural
YX_1009901001_N5	15	Neoblast
YX_1009901001_N6	0	Muscle
YX_1009901001_N7	8	Epidermal_prog3
YX_1009901001_N9	21	Parenchymal
YX_1009901001_O1	18	Neural
YX_1009901001_O10	8	Epidermal_prog3
YX_1009901001_O11	25	Neoblast
YX_1009901001_O12	9	Muscle
YX_1009901001_O13	12	Muscle
YX_1009901001_O14	15	Neoblast
YX_1009901001_O15	27	Neoblast
YX_1009901001_O16	33	Parenchymal
YX_1009901001_O17	15	Neoblast
YX_1009901001_O18	6	Muscle
YX_1009901001_O19	45	Muscle
YX_1009901001_O2	9	Muscle
YX_1009901001_O20	8	Epidermal_prog3
YX_1009901001_O21	9	Muscle
YX_1009901001_O3	6	Muscle
YX_1009901001_O4	16	Epidermal1
YX_1009901001_O5	38	Muscle
YX_1009901001_O7	8	Epidermal_prog3
YX_1009901001_O9	7	Neural
YX_1009901001_P1	2	Epidermal1
YX_1009901001_P10	32	Epidermal_prog3
YX_1009901001_P12	0	Muscle
YX_1009901001_P13	22	Muscle
YX_1009901001_P15	4	Neoblast
YX_1009901001_P16	0	Muscle
YX_1009901001_P17	39	Gland
YX_1009901001_P18	25	Parenchymal
YX_1009901001_P19	23	Epidermal_prog1
YX_1009901001_P2	0	Muscle
YX_1009901001_P20	25	Parenchymal
YX_1009901001_P21	1	Neoblast
YX_1009901001_P4	5	Cathepsin
YX_1009901001_P5	7	Neural
YX_1009901001_P8	25	Neoblast
YX_1009901002_A1	7	Neural
YX_1009901002_A10	26	Neoblast
YX_1009901002_A11	18	Neural
YX_1009901002_A12	6	Muscle
YX_1009901002_A13	15	Neoblast
YX_1009901002_A14	0	Muscle
YX_1009901002_A15	5	Cathepsin
YX_1009901002_A16	16	Epidermal2
YX_1009901002_A17	3	Parenchymal
YX_1009901002_A18	35	Neural
YX_1009901002_A19	3	Parenchymal
YX_1009901002_A2	14	Neural
YX_1009901002_A20	15	Neoblast
YX_1009901002_A22	7	Neural
YX_1009901002_A23	20	Neural
YX_1009901002_A24	0	Muscle
YX_1009901002_A3	20	Neural
YX_1009901002_A4	6	Muscle
YX_1009901002_A5	4	Neoblast
YX_1009901002_A7	6	Muscle
YX_1009901002_A8	33	Neural_KK7
YX_1009901002_A9	14	Muscle
YX_1009901002_B10	28	Neural
YX_1009901002_B12	36	Neural
YX_1009901002_B13	19	Neural
YX_1009901002_B15	39	Neoblast
YX_1009901002_B16	5	Cathepsin
YX_1009901002_B17	0	Muscle
YX_1009901002_B18	9	Muscle
YX_1009901002_B19	15	Neoblast
YX_1009901002_B22	12	Muscle
YX_1009901002_B23	28	Neural
YX_1009901002_B24	44	Neural
YX_1009901002_B3	40	Neural
YX_1009901002_B4	9	Muscle
YX_1009901002_B6	6	Muscle
YX_1009901002_B7	4	Neoblast
YX_1009901002_B9	21	Parenchymal
YX_1009901002_C1	23	Epidermal_prog1
YX_1009901002_C10	1	Neoblast
YX_1009901002_C11	13	Muscle
YX_1009901002_C12	6	Muscle
YX_1009901002_C13	1	Neoblast
YX_1009901002_C14	5	Cathepsin
YX_1009901002_C15	0	Muscle
YX_1009901002_C17	0	Muscle
YX_1009901002_C18	9	Muscle
YX_1009901002_C2	6	Muscle
YX_1009901002_C20	0	Muscle
YX_1009901002_C21	29	Neoblast
YX_1009901002_C23	2	Cathepsin
YX_1009901002_C24	1	Neoblast
YX_1009901002_C3	24	Parenchymal
YX_1009901002_C4	4	Neoblast
YX_1009901002_C5	9	Muscle
YX_1009901002_C7	1	Neoblast
YX_1009901002_C8	3	Parenchymal
YX_1009901002_D1	1	Neoblast
YX_1009901002_D10	27	Neoblast
YX_1009901002_D11	33	Neural_KK7
YX_1009901002_D12	2	Epidermal1
YX_1009901002_D13	21	Parenchymal
YX_1009901002_D14	8	Epidermal_prog2
YX_1009901002_D16	36	Neural
YX_1009901002_D17	5	Cathepsin
YX_1009901002_D18	38	Muscle
YX_1009901002_D19	6	Muscle
YX_1009901002_D20	29	Neoblast
YX_1009901002_D21	2	Epidermal1
YX_1009901002_D23	15	Neoblast
YX_1009901002_D24	9	Muscle
YX_1009901002_D3	5	Cathepsin
YX_1009901002_D4	19	Neural
YX_1009901002_D6	43	Flame cells
YX_1009901002_D7	14	Neural
YX_1009901002_D9	16	Muscle
YX_1009901002_E1	9	Muscle
YX_1009901002_E10	19	Neural
YX_1009901002_E11	4	Neoblast
YX_1009901002_E12	13	Muscle
YX_1009901002_E13	4	Neoblast
YX_1009901002_E14	5	Cathepsin
YX_1009901002_E17	0	Muscle
YX_1009901002_E18	9	Muscle
YX_1009901002_E19	27	Neoblast
YX_1009901002_E2	4	Neoblast
YX_1009901002_E20	9	Muscle
YX_1009901002_E21	30	Neoblast
YX_1009901002_E22	15	Neoblast
YX_1009901002_E23	41	Muscle
YX_1009901002_E24	5	Cathepsin
YX_1009901002_E3	4	Neoblast
YX_1009901002_E4	33	Neoblast
YX_1009901002_E5	12	Muscle
YX_1009901002_E6	27	Neoblast
YX_1009901002_E7	30	Neoblast
YX_1009901002_E8	20	Neural
YX_1009901002_E9	15	Neoblast
YX_1009901002_F1	4	Neoblast
YX_1009901002_F11	32	Intestine
YX_1009901002_F12	20	Neural
YX_1009901002_F13	19	Parenchymal
YX_1009901002_F14	16	Epidermal2
YX_1009901002_F16	15	Neoblast
YX_1009901002_F17	1	Neoblast
YX_1009901002_F2	0	Muscle
YX_1009901002_F21	11	Parenchymal
YX_1009901002_F22	1	Neoblast
YX_1009901002_F23	25	Neoblast
YX_1009901002_F24	4	Neoblast
YX_1009901002_F5	1	Neoblast
YX_1009901002_F6	1	Neoblast
YX_1009901002_F9	9	Muscle
YX_1009901002_G1	4	Neoblast
YX_1009901002_G10	1	Neoblast
YX_1009901002_G11	11	Parenchymal
YX_1009901002_G12	21	Parenchymal
YX_1009901002_G14	31	Parenchymal
YX_1009901002_G15	35	Neural
YX_1009901002_G16	18	Neural
YX_1009901002_G17	3	Parenchymal
YX_1009901002_G18	1	Neoblast
YX_1009901002_G19	8	Epidermal_prog3
YX_1009901002_G2	16	Epidermal2
YX_1009901002_G20	38	Muscle
YX_1009901002_G22	4	Neoblast
YX_1009901002_G23	22	Muscle
YX_1009901002_G24	7	Neural
YX_1009901002_G3	13	Muscle
YX_1009901002_G5	0	Muscle
YX_1009901002_G6	16	Epidermal1
YX_1009901002_G7	35	Neural
YX_1009901002_G8	9	Muscle
YX_1009901002_G9	30	Neoblast
YX_1009901002_H1	30	Neoblast
YX_1009901002_H10	15	Neoblast
YX_1009901002_H11	1	Neoblast
YX_1009901002_H12	3	Parenchymal
YX_1009901002_H13	39	Gland
YX_1009901002_H16	4	Neoblast
YX_1009901002_H17	25	Neoblast
YX_1009901002_H18	30	Neoblast
YX_1009901002_H2	15	Neoblast
YX_1009901002_H23	6	Muscle
YX_1009901002_H24	4	Neoblast
YX_1009901002_H3	9	Muscle
YX_1009901002_H4	41	Muscle
YX_1009901002_H6	1	Neoblast
YX_1009901002_H7	0	Muscle
YX_1009901002_H8	33	Neural_KK7
YX_1009901002_H9	1	Neoblast
YX_1009901002_I1	1	Neoblast
YX_1009901002_I10	0	Muscle
YX_1009901002_I11	22	Muscle
YX_1009901002_I13	26	Neoblast
YX_1009901002_I15	27	Neoblast
YX_1009901002_I16	2	Cathepsin
YX_1009901002_I17	29	Neoblast
YX_1009901002_I18	2	Parenchymal
YX_1009901002_I19	7	Neural
YX_1009901002_I20	9	Muscle
YX_1009901002_I21	30	Neoblast
YX_1009901002_I22	29	Neoblast
YX_1009901002_I23	1	Neoblast
YX_1009901002_I24	23	Epidermal_prog1
YX_1009901002_I3	13	Muscle
YX_1009901002_I4	15	Neoblast
YX_1009901002_I5	20	Neural
YX_1009901002_I6	11	Parenchymal
YX_1009901002_I7	12	Muscle
YX_1009901002_I8	29	Neoblast
YX_1009901002_J10	0	Muscle
YX_1009901002_J11	40	Neural
YX_1009901002_J12	0	Muscle
YX_1009901002_J13	14	Neural
YX_1009901002_J14	4	Neoblast
YX_1009901002_J16	14	Neural
YX_1009901002_J2	36	Neural
YX_1009901002_J22	17	Parenchymal
YX_1009901002_J23	17	Parenchymal
YX_1009901002_J24	19	Neural
YX_1009901002_J4	1	Neoblast
YX_1009901002_J5	22	Muscle
YX_1009901002_J6	0	Muscle
YX_1009901002_J7	21	Parenchymal
YX_1009901002_J8	8	Epidermal_prog2
YX_1009901002_J9	41	Muscle
YX_1009901002_K1	44	Neural
YX_1009901002_K10	6	Muscle
YX_1009901002_K11	4	Neoblast
YX_1009901002_K12	25	Parenchymal
YX_1009901002_K13	44	Neural
YX_1009901002_K14	45	Muscle
YX_1009901002_K15	32	Neoblast
YX_1009901002_K16	23	Epidermal_prog1
YX_1009901002_K17	12	Muscle
YX_1009901002_K18	36	Neural
YX_1009901002_K19	28	Neural
YX_1009901002_K20	4	Neoblast
YX_1009901002_K22	1	Neoblast
YX_1009901002_K23	1	Neoblast
YX_1009901002_K24	12	Muscle
YX_1009901002_K3	2	Parenchymal
YX_1009901002_K5	15	Neoblast
YX_1009901002_K6	11	Parenchymal
YX_1009901002_K7	46	Parenchymal
YX_1009901002_K8	13	Muscle
YX_1009901002_K9	1	Neoblast
YX_1009901002_L10	15	Neoblast
YX_1009901002_L11	4	Neoblast
YX_1009901002_L12	29	Neoblast
YX_1009901002_L13	27	Neoblast
YX_1009901002_L14	15	Neoblast
YX_1009901002_L15	12	Muscle
YX_1009901002_L16	6	Muscle
YX_1009901002_L17	8	Epidermal_prog3
YX_1009901002_L2	44	Neural
YX_1009901002_L20	0	Muscle
YX_1009901002_L22	0	Muscle
YX_1009901002_L24	4	Neoblast
YX_1009901002_L3	7	Neural
YX_1009901002_L4	1	Neoblast
YX_1009901002_L5	0	Muscle
YX_1009901002_L7	4	Neoblast
YX_1009901002_L8	20	Neural
YX_1009901002_M1	3	Parenchymal
YX_1009901002_M10	21	Parenchymal
YX_1009901002_M11	7	Neural
YX_1009901002_M14	0	Muscle
YX_1009901002_M16	26	Neoblast
YX_1009901002_M19	6	Muscle
YX_1009901002_M20	8	Epidermal_prog3
YX_1009901002_M21	24	Epidermal_prog2
YX_1009901002_M22	13	Muscle
YX_1009901002_M23	34	Neural
YX_1009901002_M24	4	Neoblast
YX_1009901002_M3	18	Neural
YX_1009901002_M4	28	Neural
YX_1009901002_M5	45	Muscle
YX_1009901002_M6	15	Neoblast
YX_1009901002_M7	0	Muscle
YX_1009901002_M9	14	Neural
YX_1009901002_N1	1	Neoblast
YX_1009901002_N10	24	Epidermal_prog2
YX_1009901002_N11	15	Neoblast
YX_1009901002_N13	28	Neural
YX_1009901002_N16	3	Parenchymal
YX_1009901002_N17	39	Neoblast
YX_1009901002_N18	0	Muscle
YX_1009901002_N19	45	Muscle
YX_1009901002_N2	8	Epidermal_prog3
YX_1009901002_N20	23	Epidermal_prog1
YX_1009901002_N23	12	Muscle
YX_1009901002_N3	7	Neural
YX_1009901002_N4	14	Neural
YX_1009901002_N5	0	Muscle
YX_1009901002_N6	5	Cathepsin
YX_1009901002_N7	23	Epidermal_prog1
YX_1009901002_N9	0	Muscle
YX_1009901002_O1	37	Cathepsin
YX_1009901002_O10	13	Muscle
YX_1009901002_O11	29	Muscle
YX_1009901002_O12	21	Parenchymal
YX_1009901002_O13	1	Neoblast
YX_1009901002_O15	9	Muscle
YX_1009901002_O16	15	Neoblast
YX_1009901002_O17	6	Muscle
YX_1009901002_O18	20	Neural
YX_1009901002_O2	30	Neoblast
YX_1009901002_O22	11	Parenchymal
YX_1009901002_O23	24	Epidermal_prog2
YX_1009901002_O3	14	Neural
YX_1009901002_O4	18	Neural
YX_1009901002_O5	24	Parenchymal
YX_1009901002_O6	0	Muscle
YX_1009901002_O7	28	Neural
YX_1009901002_O9	44	Neural
YX_1009901002_P1	25	Neoblast
YX_1009901002_P11	0	Muscle
YX_1009901002_P12	25	Neoblast
YX_1009901002_P13	29	Neoblast
YX_1009901002_P15	3	Parenchymal
YX_1009901002_P16	6	Muscle
YX_1009901002_P17	1	Neoblast
YX_1009901002_P18	36	Neural
YX_1009901002_P19	39	Neoblast
YX_1009901002_P2	0	Muscle
YX_1009901002_P20	16	Neural
YX_1009901002_P21	21	Parenchymal
YX_1009901002_P22	3	Epidermal_prog3
YX_1009901002_P23	30	Neoblast
YX_1009901002_P3	8	Epidermal_prog3
YX_1009901002_P4	12	Muscle
YX_1009901002_P5	0	Muscle
YX_1009901002_P6	20	Neural
YX_1009901002_P7	12	Muscle
YX_1009901002_P9	5	Cathepsin
YX_1009901003_A12	4	Neoblast
YX_1009901003_A13	29	Neoblast
YX_1009901003_A14	6	Muscle
YX_1009901003_A16	22	Muscle
YX_1009901003_A17	17	Neural
YX_1009901003_A2	4	Neoblast
YX_1009901003_A22	7	Neural
YX_1009901003_A23	16	Epidermal2
YX_1009901003_A4	6	Muscle
YX_1009901003_A5	32	Intestine
YX_1009901003_A6	26	Neoblast
YX_1009901003_A7	28	Neural
YX_1009901003_A8	4	Neoblast
YX_1009901003_A9	42	Neural
YX_1009901003_B1	23	Epidermal_prog1
YX_1009901003_B10	1	Neoblast
YX_1009901003_B11	36	Neural
YX_1009901003_B12	17	Neural
YX_1009901003_B13	40	Neural
YX_1009901003_B14	4	Neoblast
YX_1009901003_B16	29	Neoblast
YX_1009901003_B18	17	Parenchymal
YX_1009901003_B19	38	Muscle
YX_1009901003_B2	5	Cathepsin
YX_1009901003_B20	21	Parenchymal
YX_1009901003_B21	3	Parenchymal
YX_1009901003_B22	17	Neural
YX_1009901003_B23	1	Neoblast
YX_1009901003_B24	2	Parenchymal
YX_1009901003_B3	44	Neural
YX_1009901003_B4	44	Neural
YX_1009901003_B6	6	Muscle
YX_1009901003_B7	19	Parenchymal
YX_1009901003_B8	11	Parenchymal
YX_1009901003_C10	5	Cathepsin
YX_1009901003_C11	2	Parenchymal
YX_1009901003_C12	13	Muscle
YX_1009901003_C14	3	Parenchymal
YX_1009901003_C15	32	Intestine
YX_1009901003_C16	15	Neoblast
YX_1009901003_C17	14	Neural
YX_1009901003_C18	36	Neural
YX_1009901003_C19	19	Neural
YX_1009901003_C21	0	Muscle
YX_1009901003_C22	17	Parenchymal
YX_1009901003_C23	32	Intestine
YX_1009901003_C24	8	Epidermal_prog3
YX_1009901003_C3	39	Flame cells
YX_1009901003_C4	2	Cathepsin
YX_1009901003_C5	13	Muscle
YX_1009901003_C6	3	Parenchymal
YX_1009901003_C7	2	Parenchymal
YX_1009901003_C8	31	Neural
YX_1009901003_C9	39	Gland
YX_1009901003_D1	1	Neoblast
YX_1009901003_D10	19	Parenchymal
YX_1009901003_D11	1	Neoblast
YX_1009901003_D12	12	Muscle
YX_1009901003_D13	0	Muscle
YX_1009901003_D14	13	Muscle
YX_1009901003_D15	9	Muscle
YX_1009901003_D18	38	Muscle
YX_1009901003_D19	1	Neoblast
YX_1009901003_D2	10	Muscle
YX_1009901003_D20	26	Neoblast
YX_1009901003_D21	43	Flame cells
YX_1009901003_D22	24	Epidermal_prog2
YX_1009901003_D24	4	Neoblast
YX_1009901003_D4	8	Epidermal_prog3
YX_1009901003_D6	41	Muscle
YX_1009901003_D7	5	Cathepsin
YX_1009901003_D8	37	Cathepsin
YX_1009901003_E10	27	Neoblast
YX_1009901003_E11	22	Muscle
YX_1009901003_E13	5	Cathepsin
YX_1009901003_E17	36	Neural
YX_1009901003_E19	17	Neural
YX_1009901003_E2	23	Epidermal_prog1
YX_1009901003_E20	0	Muscle
YX_1009901003_E22	22	Muscle
YX_1009901003_E23	39	Neoblast
YX_1009901003_E24	47	Parenchymal
YX_1009901003_E4	26	Neoblast
YX_1009901003_E6	39	Gland
YX_1009901003_E7	0	Muscle
YX_1009901003_E8	13	Muscle
YX_1009901003_E9	6	Muscle
YX_1009901003_F1	1	Neoblast
YX_1009901003_F10	0	Muscle
YX_1009901003_F12	2	Parenchymal
YX_1009901003_F13	20	Neural
YX_1009901003_F17	0	Muscle
YX_1009901003_F19	13	Muscle
YX_1009901003_F2	16	Epidermal1
YX_1009901003_F20	14	Neural
YX_1009901003_F21	0	Muscle
YX_1009901003_F22	0	Muscle
YX_1009901003_F23	17	Parenchymal
YX_1009901003_F4	0	Muscle
YX_1009901003_F5	9	Muscle
YX_1009901003_F6	7	Neural
YX_1009901003_F7	9	Muscle
YX_1009901003_F8	27	Neoblast
YX_1009901003_G1	22	Muscle
YX_1009901003_G12	6	Muscle
YX_1009901003_G13	5	Cathepsin
YX_1009901003_G14	27	Neoblast
YX_1009901003_G15	9	Muscle
YX_1009901003_G16	1	Neoblast
YX_1009901003_G17	14	Neural
YX_1009901003_G18	10	Muscle
YX_1009901003_G19	9	Muscle
YX_1009901003_G20	20	Neural
YX_1009901003_G21	26	Neoblast
YX_1009901003_G22	14	Neural
YX_1009901003_G23	7	Neural
YX_1009901003_G24	16	Epidermal3
YX_1009901003_G3	22	Muscle
YX_1009901003_G4	44	Neural
YX_1009901003_G6	7	Neural
YX_1009901003_G7	23	Epidermal_prog1
YX_1009901003_G8	16	Epidermal1
YX_1009901003_G9	2	Parenchymal
YX_1009901003_H1	4	Neoblast
YX_1009901003_H12	8	Epidermal_prog3
YX_1009901003_H13	42	Neural
YX_1009901003_H14	22	Muscle
YX_1009901003_H15	45	Muscle
YX_1009901003_H16	39	Gland
YX_1009901003_H2	20	Neural
YX_1009901003_H20	18	Neural
YX_1009901003_H21	1	Neoblast
YX_1009901003_H22	32	Neoblast
YX_1009901003_H23	10	Muscle
YX_1009901003_H3	6	Muscle
YX_1009901003_H5	8	Epidermal_prog2
YX_1009901003_H7	10	Muscle
YX_1009901003_I1	30	Neoblast
YX_1009901003_I10	0	Muscle
YX_1009901003_I11	8	Epidermal_prog3
YX_1009901003_I12	0	Muscle
YX_1009901003_I13	1	Neoblast
YX_1009901003_I14	0	Muscle
YX_1009901003_I15	43	Flame cells
YX_1009901003_I16	0	Muscle
YX_1009901003_I17	5	Cathepsin
YX_1009901003_I18	20	Neural
YX_1009901003_I19	36	Neural
YX_1009901003_I2	10	Muscle
YX_1009901003_I22	12	Muscle
YX_1009901003_I23	15	Neoblast
YX_1009901003_I3	31	Neural
YX_1009901003_I4	7	Neural
YX_1009901003_I5	28	Neural
YX_1009901003_I6	26	Neoblast
YX_1009901003_I7	3	Parenchymal
YX_1009901003_J1	25	Parenchymal
YX_1009901003_J11	2	Cathepsin
YX_1009901003_J12	39	Gland
YX_1009901003_J13	0	Muscle
YX_1009901003_J14	12	Muscle
YX_1009901003_J15	6	Muscle
YX_1009901003_J17	2	Cathepsin
YX_1009901003_J18	10	Muscle
YX_1009901003_J19	3	Parenchymal
YX_1009901003_J2	7	Neural
YX_1009901003_J20	0	Muscle
YX_1009901003_J21	20	Neural
YX_1009901003_J23	4	Neoblast
YX_1009901003_J3	26	Neoblast
YX_1009901003_J5	29	Neoblast
YX_1009901003_J6	42	Neural
YX_1009901003_J7	2	Cathepsin
YX_1009901003_J8	29	Muscle
YX_1009901003_J9	38	Muscle
YX_1009901003_K1	0	Muscle
YX_1009901003_K10	9	Muscle
YX_1009901003_K12	7	Neural
YX_1009901003_K13	11	Parenchymal
YX_1009901003_K14	30	Neural
YX_1009901003_K15	31	Neural
YX_1009901003_K16	9	Muscle
YX_1009901003_K17	7	Neural
YX_1009901003_K18	2	Cathepsin
YX_1009901003_K19	1	Neoblast
YX_1009901003_K2	12	Muscle
YX_1009901003_K20	0	Muscle
YX_1009901003_K21	14	Neural
YX_1009901003_K22	42	Neural
YX_1009901003_K23	4	Neoblast
YX_1009901003_K24	10	Muscle
YX_1009901003_K3	0	Muscle
YX_1009901003_K4	26	Neoblast
YX_1009901003_K5	7	Neural
YX_1009901003_K8	16	Epidermal3
YX_1009901003_K9	15	Neoblast
YX_1009901003_L10	7	Neural
YX_1009901003_L11	12	Muscle
YX_1009901003_L12	27	Neoblast
YX_1009901003_L13	4	Neoblast
YX_1009901003_L14	16	Epidermal1
YX_1009901003_L15	18	Neural
YX_1009901003_L16	32	Intestine
YX_1009901003_L17	26	Neoblast
YX_1009901003_L18	32	Intestine
YX_1009901003_L20	25	Parenchymal
YX_1009901003_L21	32	Intestine
YX_1009901003_L23	10	Muscle
YX_1009901003_L6	8	Epidermal_prog3
YX_1009901003_L7	39	Gland
YX_1009901003_L8	1	Neoblast
YX_1009901003_L9	0	Muscle
YX_1009901003_M1	7	Neural
YX_1009901003_M11	30	Neoblast
YX_1009901003_M12	0	Muscle
YX_1009901003_M13	4	Neoblast
YX_1009901003_M14	4	Neoblast
YX_1009901003_M15	1	Neoblast
YX_1009901003_M17	6	Muscle
YX_1009901003_M18	32	Neoblast
YX_1009901003_M2	9	Muscle
YX_1009901003_M20	8	Epidermal_prog3
YX_1009901003_M21	26	Neoblast
YX_1009901003_M22	5	Cathepsin
YX_1009901003_M24	6	Muscle
YX_1009901003_M3	35	Neural
YX_1009901003_M5	23	Epidermal_prog1
YX_1009901003_M7	13	Muscle
YX_1009901003_M8	15	Neoblast
YX_1009901003_M9	3	Parenchymal
YX_1009901003_N1	0	Muscle
YX_1009901003_N10	5	Cathepsin
YX_1009901003_N11	16	Epidermal2
YX_1009901003_N14	20	Neural
YX_1009901003_N15	1	Neoblast
YX_1009901003_N16	14	Neural
YX_1009901003_N17	12	Muscle
YX_1009901003_N19	22	Muscle
YX_1009901003_N2	1	Neoblast
YX_1009901003_N20	4	Neoblast
YX_1009901003_N21	4	Neoblast
YX_1009901003_N22	2	Cathepsin
YX_1009901003_N23	1	Neoblast
YX_1009901003_N3	6	Muscle
YX_1009901003_N5	33	Parenchymal
YX_1009901003_N7	13	Muscle
YX_1009901003_N9	0	Muscle
YX_1009901003_O10	6	Muscle
YX_1009901003_O12	40	Neural
YX_1009901003_O14	33	Neoblast
YX_1009901003_O15	2	Cathepsin
YX_1009901003_O16	1	Neoblast
YX_1009901003_O17	2	Parenchymal
YX_1009901003_O18	4	Neoblast
YX_1009901003_O2	12	Muscle
YX_1009901003_O20	6	Muscle
YX_1009901003_O21	30	Neoblast
YX_1009901003_O22	27	Neoblast
YX_1009901003_O23	0	Muscle
YX_1009901003_O4	0	Muscle
YX_1009901003_O5	3	Parenchymal
YX_1009901003_O6	8	Epidermal_prog3
YX_1009901003_O7	5	Cathepsin
YX_1009901003_O8	4	Neoblast
YX_1009901003_P10	0	Muscle
YX_1009901003_P11	12	Muscle
YX_1009901003_P12	8	Epidermal_prog3
YX_1009901003_P13	0	Muscle
YX_1009901003_P15	5	Cathepsin
YX_1009901003_P18	1	Neoblast
YX_1009901003_P19	36	Neural
YX_1009901003_P22	15	Neoblast
YX_1009901003_P23	4	Neoblast
YX_1009901003_P3	2	Cathepsin
YX_1009901003_P5	27	Neoblast
YX_1009901003_P6	22	Muscle
YX_1009901003_P7	29	Neoblast
YX_1009901003_P8	0	Muscle
YX_1009901003_P9	0	Muscle
YX_1009901004_A1	1	Neoblast
YX_1009901004_A10	1	Neoblast
YX_1009901004_A11	19	Neural
YX_1009901004_A13	21	Parenchymal
YX_1009901004_A14	13	Muscle
YX_1009901004_A16	7	Neural
YX_1009901004_A17	46	Parenchymal
YX_1009901004_A18	23	Epidermal_prog1
YX_1009901004_A19	2	Cathepsin
YX_1009901004_A2	25	Parenchymal
YX_1009901004_A20	22	Muscle
YX_1009901004_A21	24	Epidermal_prog2
YX_1009901004_A22	22	Muscle
YX_1009901004_A4	5	Cathepsin
YX_1009901004_A5	36	Neural
YX_1009901004_A6	15	Neoblast
YX_1009901004_A8	5	Cathepsin
YX_1009901004_A9	5	Cathepsin
YX_1009901004_B1	18	Neural
YX_1009901004_B11	3	Parenchymal
YX_1009901004_B13	29	Neoblast
YX_1009901004_B14	23	Epidermal_prog1
YX_1009901004_B15	32	Intestine
YX_1009901004_B16	44	Neural
YX_1009901004_B17	20	Neural
YX_1009901004_B19	24	Parenchymal
YX_1009901004_B20	17	Parenchymal
YX_1009901004_B21	3	Parenchymal
YX_1009901004_B22	12	Muscle
YX_1009901004_B24	0	Muscle
YX_1009901004_B3	0	Muscle
YX_1009901004_B4	0	Muscle
YX_1009901004_B5	5	Cathepsin
YX_1009901004_B6	2	Parenchymal
YX_1009901004_B7	10	Muscle
YX_1009901004_B8	23	Epidermal_prog1
YX_1009901004_C1	21	Parenchymal
YX_1009901004_C10	13	Muscle
YX_1009901004_C11	1	Neoblast
YX_1009901004_C12	3	Parenchymal
YX_1009901004_C13	13	Muscle
YX_1009901004_C14	1	Neoblast
YX_1009901004_C17	3	Parenchymal
YX_1009901004_C19	22	Muscle
YX_1009901004_C2	22	Muscle
YX_1009901004_C20	0	Muscle
YX_1009901004_C22	3	Parenchymal
YX_1009901004_C23	9	Muscle
YX_1009901004_C24	32	Intestine
YX_1009901004_C5	18	Neural
YX_1009901004_C7	9	Muscle
YX_1009901004_C8	26	Neoblast
YX_1009901004_D1	1	Neoblast
YX_1009901004_D11	4	Neoblast
YX_1009901004_D12	12	Muscle
YX_1009901004_D13	17	Neural
YX_1009901004_D14	2	Parenchymal
YX_1009901004_D16	24	Parenchymal
YX_1009901004_D17	39	Gland
YX_1009901004_D18	15	Neoblast
YX_1009901004_D19	7	Neural
YX_1009901004_D2	19	Parenchymal
YX_1009901004_D22	14	Neural
YX_1009901004_D23	1	Neoblast
YX_1009901004_D24	0	Muscle
YX_1009901004_D3	9	Muscle
YX_1009901004_D4	20	Neural
YX_1009901004_D5	2	Parenchymal
YX_1009901004_D6	5	Cathepsin
YX_1009901004_D7	1	Neoblast
YX_1009901004_D8	7	Neural
YX_1009901004_D9	1	Neoblast
YX_1009901004_E1	11	Parenchymal
YX_1009901004_E10	0	Muscle
YX_1009901004_E11	12	Muscle
YX_1009901004_E12	18	Neural
YX_1009901004_E13	11	Parenchymal
YX_1009901004_E14	26	Neoblast
YX_1009901004_E15	2	Neural
YX_1009901004_E16	11	Parenchymal
YX_1009901004_E17	28	Neural
YX_1009901004_E18	20	Neural
YX_1009901004_E19	2	Cathepsin
YX_1009901004_E2	2	Parenchymal
YX_1009901004_E20	22	Muscle
YX_1009901004_E22	7	Neural
YX_1009901004_E23	9	Muscle
YX_1009901004_E24	36	Neural
YX_1009901004_E3	1	Neoblast
YX_1009901004_E4	28	Neural
YX_1009901004_E5	18	Neural
YX_1009901004_E7	22	Muscle
YX_1009901004_E9	1	Neoblast
YX_1009901004_F1	40	Neural
YX_1009901004_F11	2	Parenchymal
YX_1009901004_F14	21	Parenchymal
YX_1009901004_F15	26	Neoblast
YX_1009901004_F16	34	Neural
YX_1009901004_F17	2	Cathepsin
YX_1009901004_F18	8	Epidermal_prog3
YX_1009901004_F23	2	Cathepsin
YX_1009901004_F3	18	Neural
YX_1009901004_F4	10	Parenchymal
YX_1009901004_F5	2	Cathepsin
YX_1009901004_F6	31	Parenchymal
YX_1009901004_F7	32	Intestine
YX_1009901004_F8	0	Muscle
YX_1009901004_F9	29	Neoblast
YX_1009901004_G1	4	Neoblast
YX_1009901004_G10	14	Neural
YX_1009901004_G11	1	Neoblast
YX_1009901004_G14	8	Epidermal_prog3
YX_1009901004_G15	0	Muscle
YX_1009901004_G16	12	Muscle
YX_1009901004_G17	9	Muscle
YX_1009901004_G18	1	Neoblast
YX_1009901004_G19	0	Muscle
YX_1009901004_G2	13	Muscle
YX_1009901004_G20	4	Neoblast
YX_1009901004_G21	1	Neoblast
YX_1009901004_G22	5	Cathepsin
YX_1009901004_G24	42	Neural
YX_1009901004_G3	20	Neural
YX_1009901004_G4	33	Neural_KK7
YX_1009901004_G8	14	Neural
YX_1009901004_G9	19	Neural
YX_1009901004_H1	38	Muscle
YX_1009901004_H10	23	Epidermal_prog1
YX_1009901004_H11	11	Parenchymal
YX_1009901004_H12	4	Neoblast
YX_1009901004_H14	6	Muscle
YX_1009901004_H15	4	Neoblast
YX_1009901004_H16	19	Parenchymal
YX_1009901004_H17	3	Parenchymal
YX_1009901004_H18	9	Muscle
YX_1009901004_H19	8	Epidermal_prog3
YX_1009901004_H2	1	Neoblast
YX_1009901004_H20	1	Neoblast
YX_1009901004_H21	29	Neoblast
YX_1009901004_H22	7	Neural
YX_1009901004_H24	1	Neoblast
YX_1009901004_H3	0	Muscle
YX_1009901004_H4	15	Neoblast
YX_1009901004_H7	26	Neoblast
YX_1009901004_H8	23	Epidermal_prog1
YX_1009901004_H9	2	Parenchymal
YX_1009901004_I1	0	Muscle
YX_1009901004_I12	0	Muscle
YX_1009901004_I13	0	Muscle
YX_1009901004_I15	18	Neural
YX_1009901004_I16	14	Neural
YX_1009901004_I17	2	Epidermal1
YX_1009901004_I19	29	Neoblast
YX_1009901004_I2	8	Epidermal_prog2
YX_1009901004_I20	28	Neural
YX_1009901004_I21	9	Muscle
YX_1009901004_I22	1	Neoblast
YX_1009901004_I23	1	Neoblast
YX_1009901004_I24	13	Muscle
YX_1009901004_I3	6	Muscle
YX_1009901004_I4	12	Muscle
YX_1009901004_I5	4	Neoblast
YX_1009901004_I6	12	Muscle
YX_1009901004_I7	24	Parenchymal
YX_1009901004_I9	15	Neoblast
YX_1009901004_J1	19	Neural
YX_1009901004_J10	5	Cathepsin
YX_1009901004_J11	10	Muscle
YX_1009901004_J12	0	Muscle
YX_1009901004_J14	10	Muscle
YX_1009901004_J16	37	Cathepsin
YX_1009901004_J17	32	Intestine
YX_1009901004_J19	6	Muscle
YX_1009901004_J20	11	Parenchymal
YX_1009901004_J22	38	Muscle
YX_1009901004_J23	1	Neoblast
YX_1009901004_J24	4	Neoblast
YX_1009901004_J3	6	Muscle
YX_1009901004_J4	42	Neural
YX_1009901004_J6	2	Cathepsin
YX_1009901004_J7	13	Muscle
YX_1009901004_J8	6	Muscle
YX_1009901004_J9	1	Neoblast
YX_1009901004_K1	25	Neoblast
YX_1009901004_K11	4	Neoblast
YX_1009901004_K12	26	Neoblast
YX_1009901004_K14	6	Muscle
YX_1009901004_K15	29	Muscle
YX_1009901004_K16	8	Parenchymal
YX_1009901004_K19	1	Neoblast
YX_1009901004_K2	15	Neoblast
YX_1009901004_K20	2	Parenchymal
YX_1009901004_K23	2	Cathepsin
YX_1009901004_K24	34	Neural
YX_1009901004_K3	1	Neoblast
YX_1009901004_K4	22	Muscle
YX_1009901004_K5	17	Parenchymal
YX_1009901004_K7	18	Neural
YX_1009901004_K8	17	Parenchymal
YX_1009901004_L1	5	Cathepsin
YX_1009901004_L10	9	Muscle
YX_1009901004_L11	33	Neural_KK7
YX_1009901004_L12	2	Parenchymal
YX_1009901004_L13	4	Neoblast
YX_1009901004_L15	6	Muscle
YX_1009901004_L16	15	Neoblast
YX_1009901004_L17	0	Muscle
YX_1009901004_L18	3	Parenchymal
YX_1009901004_L20	0	Muscle
YX_1009901004_L21	6	Muscle
YX_1009901004_L24	0	Muscle
YX_1009901004_L3	13	Muscle
YX_1009901004_L5	21	Parenchymal
YX_1009901004_L7	21	Parenchymal
YX_1009901004_L8	6	Muscle
YX_1009901004_L9	1	Neoblast
YX_1009901004_M10	1	Neoblast
YX_1009901004_M12	30	Neoblast
YX_1009901004_M13	15	Neoblast
YX_1009901004_M14	38	Muscle
YX_1009901004_M15	13	Muscle
YX_1009901004_M16	7	Neural
YX_1009901004_M17	15	Neoblast
YX_1009901004_M18	12	Muscle
YX_1009901004_M19	4	Neoblast
YX_1009901004_M2	2	Cathepsin
YX_1009901004_M21	7	Neural
YX_1009901004_M22	19	Neural
YX_1009901004_M24	11	Parenchymal
YX_1009901004_M3	11	Parenchymal
YX_1009901004_M4	45	Muscle
YX_1009901004_M5	12	Muscle
YX_1009901004_M6	16	Epidermal2
YX_1009901004_M7	10	Muscle
YX_1009901004_M8	18	Neural
YX_1009901004_N1	14	Neural
YX_1009901004_N10	36	Neural
YX_1009901004_N11	5	Cathepsin
YX_1009901004_N12	1	Neoblast
YX_1009901004_N13	12	Muscle
YX_1009901004_N14	24	Epidermal_prog2
YX_1009901004_N15	8	Epidermal_prog2
YX_1009901004_N16	2	Parenchymal
YX_1009901004_N17	2	Cathepsin
YX_1009901004_N18	14	Neural
YX_1009901004_N2	22	Muscle
YX_1009901004_N20	1	Neoblast
YX_1009901004_N22	14	Neural
YX_1009901004_N23	20	Neural
YX_1009901004_N24	2	Parenchymal
YX_1009901004_N3	0	Muscle
YX_1009901004_N4	1	Neoblast
YX_1009901004_N5	0	Muscle
YX_1009901004_N7	5	Cathepsin
YX_1009901004_N8	22	Muscle
YX_1009901004_O1	13	Muscle
YX_1009901004_O10	44	Neural
YX_1009901004_O11	45	Muscle
YX_1009901004_O12	14	Muscle
YX_1009901004_O13	15	Neoblast
YX_1009901004_O14	6	Muscle
YX_1009901004_O15	32	Neoblast
YX_1009901004_O16	27	Neoblast
YX_1009901004_O17	13	Muscle
YX_1009901004_O19	4	Neoblast
YX_1009901004_O2	15	Neoblast
YX_1009901004_O20	19	Parenchymal
YX_1009901004_O21	1	Neoblast
YX_1009901004_O22	10	Muscle
YX_1009901004_O23	18	Neural
YX_1009901004_O5	14	Neural
YX_1009901004_O6	38	Muscle
YX_1009901004_O7	13	Muscle
YX_1009901004_O8	4	Neoblast
YX_1009901004_P1	34	Neural
YX_1009901004_P10	11	Parenchymal
YX_1009901004_P12	15	Neoblast
YX_1009901004_P13	30	Neoblast
YX_1009901004_P14	0	Muscle
YX_1009901004_P15	21	Parenchymal
YX_1009901004_P16	2	Parenchymal
YX_1009901004_P17	31	Neural
YX_1009901004_P18	17	Neural
YX_1009901004_P2	15	Neoblast
YX_1009901004_P20	12	Muscle
YX_1009901004_P21	10	Muscle
YX_1009901004_P22	4	Neoblast
YX_1009901004_P23	24	Epidermal_prog2
YX_1009901004_P3	1	Neoblast
YX_1009901004_P4	32	Intestine
YX_1009901004_P6	14	Neural
YX_1009901004_P7	18	Neural
YX_1009901005_A10	28	Neural
YX_1009901005_A11	24	Epidermal_prog2
YX_1009901005_A13	27	Neoblast
YX_1009901005_A14	4	Neoblast
YX_1009901005_A15	14	Neural
YX_1009901005_A16	2	Parenchymal
YX_1009901005_A17	29	Neoblast
YX_1009901005_A19	29	Neoblast
YX_1009901005_A2	31	Neural
YX_1009901005_A20	28	Neural
YX_1009901005_A21	25	Neoblast
YX_1009901005_A24	37	Cathepsin
YX_1009901005_A4	0	Muscle
YX_1009901005_A6	15	Neoblast
YX_1009901005_A8	13	Muscle
YX_1009901005_A9	0	Muscle
YX_1009901005_B1	15	Neoblast
YX_1009901005_B10	6	Cathepsin
YX_1009901005_B11	4	Neoblast
YX_1009901005_B13	16	Epidermal2
YX_1009901005_B14	22	Muscle
YX_1009901005_B15	0	Muscle
YX_1009901005_B16	8	Epidermal_prog3
YX_1009901005_B18	4	Neoblast
YX_1009901005_B19	14	Neural
YX_1009901005_B2	16	Epidermal3
YX_1009901005_B20	20	Neural
YX_1009901005_B21	1	Neoblast
YX_1009901005_B22	22	Neoblast
YX_1009901005_B23	36	Neural
YX_1009901005_B3	40	Neural
YX_1009901005_B4	30	Neoblast
YX_1009901005_B5	7	Neural
YX_1009901005_B7	3	Parenchymal
YX_1009901005_B8	9	Muscle
YX_1009901005_B9	14	Neural
YX_1009901005_C1	1	Neoblast
YX_1009901005_C10	4	Neoblast
YX_1009901005_C12	33	Neoblast
YX_1009901005_C13	14	Neural
YX_1009901005_C14	37	Cathepsin
YX_1009901005_C15	5	Cathepsin
YX_1009901005_C16	9	Muscle
YX_1009901005_C17	36	Neural
YX_1009901005_C18	2	Parenchymal
YX_1009901005_C19	46	Parenchymal
YX_1009901005_C20	43	Flame cells
YX_1009901005_C21	23	Epidermal_prog1
YX_1009901005_C24	17	Parenchymal
YX_1009901005_C3	0	Muscle
YX_1009901005_C5	30	Neoblast
YX_1009901005_C6	6	Muscle
YX_1009901005_C7	17	Neural
YX_1009901005_C8	17	Parenchymal
YX_1009901005_C9	1	Neoblast
YX_1009901005_D10	9	Muscle
YX_1009901005_D12	6	Muscle
YX_1009901005_D13	1	Neoblast
YX_1009901005_D14	17	Neural
YX_1009901005_D15	21	Parenchymal
YX_1009901005_D17	32	Intestine
YX_1009901005_D18	7	Neural
YX_1009901005_D2	22	Muscle
YX_1009901005_D20	7	Neural
YX_1009901005_D21	20	Neural
YX_1009901005_D22	33	Neoblast
YX_1009901005_D23	24	Parenchymal
YX_1009901005_D3	19	Parenchymal
YX_1009901005_D4	24	Epidermal_prog2
YX_1009901005_D5	2	Cathepsin
YX_1009901005_D6	40	Neural
YX_1009901005_D8	11	Parenchymal
YX_1009901005_D9	0	Muscle
YX_1009901005_E1	0	Muscle
YX_1009901005_E12	1	Neoblast
YX_1009901005_E13	13	Muscle
YX_1009901005_E15	11	Parenchymal
YX_1009901005_E17	0	Muscle
YX_1009901005_E18	5	Cathepsin
YX_1009901005_E19	23	Epidermal_prog1
YX_1009901005_E2	2	Parenchymal
YX_1009901005_E20	4	Neoblast
YX_1009901005_E22	43	Flame cells
YX_1009901005_E23	5	Cathepsin
YX_1009901005_E24	2	Cathepsin
YX_1009901005_E3	4	Neoblast
YX_1009901005_E5	29	Neoblast
YX_1009901005_E6	1	Neoblast
YX_1009901005_E7	1	Neoblast
YX_1009901005_E9	1	Neoblast
YX_1009901005_F10	13	Muscle
YX_1009901005_F11	18	Neural
YX_1009901005_F12	1	Neoblast
YX_1009901005_F14	17	Neural
YX_1009901005_F15	38	Muscle
YX_1009901005_F16	23	Epidermal_prog1
YX_1009901005_F17	42	Neural
YX_1009901005_F18	3	Parenchymal
YX_1009901005_F19	9	Muscle
YX_1009901005_F2	7	Neural
YX_1009901005_F20	4	Neoblast
YX_1009901005_F21	2	Parenchymal
YX_1009901005_F22	31	Neural
YX_1009901005_F23	11	Parenchymal
YX_1009901005_F24	8	Parenchymal
YX_1009901005_F4	4	Neoblast
YX_1009901005_F7	4	Neoblast
YX_1009901005_F8	0	Muscle
YX_1009901005_G1	15	Neoblast
YX_1009901005_G10	14	Neural
YX_1009901005_G12	22	Muscle
YX_1009901005_G14	4	Neoblast
YX_1009901005_G15	33	Neural_KK7
YX_1009901005_G16	4	Neoblast
YX_1009901005_G17	1	Neoblast
YX_1009901005_G18	40	Neural
YX_1009901005_G19	32	Intestine
YX_1009901005_G20	7	Neural
YX_1009901005_G21	2	Cathepsin
YX_1009901005_G23	19	Parenchymal
YX_1009901005_G3	1	Neoblast
YX_1009901005_G5	15	Neoblast
YX_1009901005_G6	1	Neoblast
YX_1009901005_G8	13	Muscle
YX_1009901005_G9	28	Neural
YX_1009901005_H10	20	Neural
YX_1009901005_H11	6	Muscle
YX_1009901005_H12	0	Muscle
YX_1009901005_H13	5	Cathepsin
YX_1009901005_H14	4	Neoblast
YX_1009901005_H15	4	Neoblast
YX_1009901005_H17	10	Muscle
YX_1009901005_H18	41	Muscle
YX_1009901005_H19	24	Epidermal_prog2
YX_1009901005_H2	17	Neural
YX_1009901005_H20	11	Parenchymal
YX_1009901005_H21	14	Neural
YX_1009901005_H22	0	Muscle
YX_1009901005_H23	32	Intestine
YX_1009901005_H3	29	Neoblast
YX_1009901005_H5	2	Cathepsin
YX_1009901005_H6	7	Neural
YX_1009901005_H7	38	Muscle
YX_1009901005_H9	33	Neural_KK7
YX_1009901005_I1	13	Muscle
YX_1009901005_I10	2	Cathepsin
YX_1009901005_I11	22	Muscle
YX_1009901005_I12	13	Muscle
YX_1009901005_I14	0	Muscle
YX_1009901005_I15	18	Neural
YX_1009901005_I16	24	Epidermal_prog2
YX_1009901005_I17	45	Muscle
YX_1009901005_I18	8	Epidermal1
YX_1009901005_I2	15	Neoblast
YX_1009901005_I20	22	Muscle
YX_1009901005_I22	3	Parenchymal
YX_1009901005_I24	35	Neural
YX_1009901005_I3	2	Parenchymal
YX_1009901005_I4	16	Epidermal3
YX_1009901005_I5	4	Neoblast
YX_1009901005_I8	37	Cathepsin
YX_1009901005_I9	12	Muscle
YX_1009901005_J1	28	Neural
YX_1009901005_J10	2	Cathepsin
YX_1009901005_J13	13	Muscle
YX_1009901005_J14	11	Parenchymal
YX_1009901005_J15	9	Muscle
YX_1009901005_J17	45	Muscle
YX_1009901005_J18	0	Muscle
YX_1009901005_J19	1	Neoblast
YX_1009901005_J2	2	Cathepsin
YX_1009901005_J20	32	Neoblast
YX_1009901005_J22	40	Neural
YX_1009901005_J23	33	Neoblast
YX_1009901005_J24	16	Epidermal1
YX_1009901005_J3	1	Neoblast
YX_1009901005_J5	0	Muscle
YX_1009901005_J7	13	Muscle
YX_1009901005_J9	8	Epidermal_prog3
YX_1009901005_K10	1	Neoblast
YX_1009901005_K11	1	Neoblast
YX_1009901005_K12	30	Neoblast
YX_1009901005_K13	4	Neoblast
YX_1009901005_K14	0	Muscle
YX_1009901005_K15	9	Muscle
YX_1009901005_K16	4	Neoblast
YX_1009901005_K18	13	Muscle
YX_1009901005_K19	14	Neural
YX_1009901005_K21	4	Neoblast
YX_1009901005_K22	0	Muscle
YX_1009901005_K23	19	Neural
YX_1009901005_K24	12	Muscle
YX_1009901005_K3	43	Flame cells
YX_1009901005_K4	6	Muscle
YX_1009901005_K5	12	Muscle
YX_1009901005_K6	2	Parenchymal
YX_1009901005_K7	4	Neoblast
YX_1009901005_K8	8	Epidermal_prog2
YX_1009901005_K9	32	Neoblast
YX_1009901005_L1	44	Neural
YX_1009901005_L10	1	Neoblast
YX_1009901005_L11	2	Cathepsin
YX_1009901005_L12	17	Neural
YX_1009901005_L13	22	Muscle
YX_1009901005_L14	14	Gland
YX_1009901005_L15	3	Parenchymal
YX_1009901005_L16	0	Muscle
YX_1009901005_L17	20	Neural
YX_1009901005_L19	5	Cathepsin
YX_1009901005_L2	19	Parenchymal
YX_1009901005_L20	1	Neoblast
YX_1009901005_L21	28	Neural
YX_1009901005_L22	36	Neural
YX_1009901005_L23	0	Muscle
YX_1009901005_L3	22	Muscle
YX_1009901005_L4	5	Cathepsin
YX_1009901005_L6	7	Neural
YX_1009901005_L7	13	Muscle
YX_1009901005_L9	2	Cathepsin
YX_1009901005_M1	2	Cathepsin
YX_1009901005_M10	3	Parenchymal
YX_1009901005_M11	21	Parenchymal
YX_1009901005_M13	16	Epidermal2
YX_1009901005_M14	5	Cathepsin
YX_1009901005_M15	46	Parenchymal
YX_1009901005_M17	4	Neoblast
YX_1009901005_M18	0	Muscle
YX_1009901005_M19	5	Cathepsin
YX_1009901005_M2	7	Neural
YX_1009901005_M20	3	Parenchymal
YX_1009901005_M21	9	Muscle
YX_1009901005_M23	5	Cathepsin
YX_1009901005_M24	6	Muscle
YX_1009901005_M3	42	Neural
YX_1009901005_M4	0	Muscle
YX_1009901005_M5	1	Neoblast
YX_1009901005_M6	41	Muscle
YX_1009901005_M7	1	Neoblast
YX_1009901005_M8	32	Intestine
YX_1009901005_M9	4	Neoblast
YX_1009901005_N10	21	Parenchymal
YX_1009901005_N12	16	Epidermal3
YX_1009901005_N13	15	Neoblast
YX_1009901005_N15	33	Neural_KK7
YX_1009901005_N16	9	Muscle
YX_1009901005_N17	11	Parenchymal
YX_1009901005_N18	9	Muscle
YX_1009901005_N19	8	Epidermal_prog3
YX_1009901005_N2	18	Neural
YX_1009901005_N20	46	Parenchymal
YX_1009901005_N21	24	Parenchymal
YX_1009901005_N22	16	Epidermal1
YX_1009901005_N23	30	Neoblast
YX_1009901005_N24	4	Neoblast
YX_1009901005_N3	0	Muscle
YX_1009901005_N4	3	Parenchymal
YX_1009901005_N5	10	Muscle
YX_1009901005_N6	7	Neural
YX_1009901005_N7	24	Parenchymal
YX_1009901005_N9	6	Muscle
YX_1009901005_O1	6	Muscle
YX_1009901005_O10	6	Muscle
YX_1009901005_O11	4	Neoblast
YX_1009901005_O12	14	Neural
YX_1009901005_O13	5	Cathepsin
YX_1009901005_O14	4	Neoblast
YX_1009901005_O15	0	Muscle
YX_1009901005_O16	22	Muscle
YX_1009901005_O18	1	Neoblast
YX_1009901005_O19	6	Muscle
YX_1009901005_O20	0	Muscle
YX_1009901005_O21	7	Neural
YX_1009901005_O22	33	Neural_KK7
YX_1009901005_O23	15	Neoblast
YX_1009901005_O5	20	Muscle
YX_1009901005_O6	12	Muscle
YX_1009901005_O8	30	Neoblast
YX_1009901005_O9	9	Muscle
YX_1009901005_P10	19	Neural
YX_1009901005_P11	0	Muscle
YX_1009901005_P13	10	Muscle
YX_1009901005_P14	22	Muscle
YX_1009901005_P15	0	Muscle
YX_1009901005_P17	19	Parenchymal
YX_1009901005_P18	5	Cathepsin
YX_1009901005_P2	33	Parenchymal
YX_1009901005_P20	39	Gland
YX_1009901005_P22	12	Muscle
YX_1009901005_P5	3	Parenchymal
YX_1009901005_P9	10	Muscle
YX_1009901006_A11	26	Neoblast
YX_1009901006_A13	2	Parenchymal
YX_1009901006_A16	39	Neoblast
YX_1009901006_A17	17	Parenchymal
YX_1009901006_A18	43	Parenchymal
YX_1009901006_A20	30	Neoblast
YX_1009901006_A21	35	Neural
YX_1009901006_A22	33	Neural_KK7
YX_1009901006_A23	27	Neoblast
YX_1009901006_A4	2	Cathepsin
YX_1009901006_A6	26	Neoblast
YX_1009901006_A7	2	Cathepsin
YX_1009901006_A8	7	Neural
YX_1009901006_B1	36	Neural
YX_1009901006_B10	2	Parenchymal
YX_1009901006_B11	41	Muscle
YX_1009901006_B12	30	Neoblast
YX_1009901006_B13	22	Muscle
YX_1009901006_B16	3	Parenchymal
YX_1009901006_B18	2	Parenchymal
YX_1009901006_B19	11	Parenchymal
YX_1009901006_B2	6	Muscle
YX_1009901006_B22	6	Muscle
YX_1009901006_B23	36	Neural
YX_1009901006_B24	6	Muscle
YX_1009901006_B3	28	Neural
YX_1009901006_B4	1	Neoblast
YX_1009901006_B5	34	Neural
YX_1009901006_B6	1	Neoblast
YX_1009901006_B7	1	Neoblast
YX_1009901006_B8	23	Epidermal_prog1
YX_1009901006_B9	13	Muscle
YX_1009901006_C10	18	Neural
YX_1009901006_C11	22	Muscle
YX_1009901006_C12	28	Neural
YX_1009901006_C13	13	Muscle
YX_1009901006_C14	33	Neural_KK7
YX_1009901006_C15	19	Neural
YX_1009901006_C16	4	Neoblast
YX_1009901006_C18	20	Neural
YX_1009901006_C19	6	Muscle
YX_1009901006_C2	5	Cathepsin
YX_1009901006_C20	7	Neural
YX_1009901006_C21	6	Muscle
YX_1009901006_C22	9	Muscle
YX_1009901006_C23	33	Muscle
YX_1009901006_C24	5	Cathepsin
YX_1009901006_C4	0	Muscle
YX_1009901006_C5	18	Neural
YX_1009901006_C6	9	Muscle
YX_1009901006_C7	8	Epidermal_prog3
YX_1009901006_C8	6	Muscle
YX_1009901006_C9	2	Cathepsin
YX_1009901006_D10	26	Neoblast
YX_1009901006_D12	30	Neoblast
YX_1009901006_D15	12	Muscle
YX_1009901006_D16	15	Neoblast
YX_1009901006_D19	6	Muscle
YX_1009901006_D20	16	Epidermal1
YX_1009901006_D21	2	Cathepsin
YX_1009901006_D22	0	Muscle
YX_1009901006_D23	2	Cathepsin
YX_1009901006_D24	4	Neoblast
YX_1009901006_D3	15	Neoblast
YX_1009901006_D5	2	Cathepsin
YX_1009901006_D7	29	Neoblast
YX_1009901006_D9	2	Cathepsin
YX_1009901006_E1	11	Parenchymal
YX_1009901006_E10	47	Parenchymal
YX_1009901006_E11	9	Muscle
YX_1009901006_E13	18	Neural
YX_1009901006_E14	29	Neoblast
YX_1009901006_E16	35	Neural
YX_1009901006_E17	23	Epidermal_prog1
YX_1009901006_E18	20	Neural
YX_1009901006_E19	19	Parenchymal
YX_1009901006_E20	5	Cathepsin
YX_1009901006_E21	11	Parenchymal
YX_1009901006_E22	22	Muscle
YX_1009901006_E23	9	Muscle
YX_1009901006_E4	4	Neoblast
YX_1009901006_E5	13	Muscle
YX_1009901006_E6	4	Neoblast
YX_1009901006_E7	31	Parenchymal
YX_1009901006_E8	7	Neural
YX_1009901006_F1	4	Neoblast
YX_1009901006_F12	27	Neoblast
YX_1009901006_F13	15	Neoblast
YX_1009901006_F14	5	Cathepsin
YX_1009901006_F16	1	Neoblast
YX_1009901006_F18	1	Neoblast
YX_1009901006_F2	6	Muscle
YX_1009901006_F20	27	Neoblast
YX_1009901006_F21	29	Neoblast
YX_1009901006_F23	0	Muscle
YX_1009901006_F24	28	Neural
YX_1009901006_F3	5	Cathepsin
YX_1009901006_F4	8	Epidermal1
YX_1009901006_F5	44	Neural
YX_1009901006_F6	13	Muscle
YX_1009901006_F7	45	Muscle
YX_1009901006_F9	4	Neoblast
YX_1009901006_G1	19	Parenchymal
YX_1009901006_G10	5	Cathepsin
YX_1009901006_G11	3	Parenchymal
YX_1009901006_G12	13	Muscle
YX_1009901006_G13	2	Muscle
YX_1009901006_G15	16	Neural
YX_1009901006_G16	6	Muscle
YX_1009901006_G17	0	Muscle
YX_1009901006_G18	41	Muscle
YX_1009901006_G19	13	Muscle
YX_1009901006_G2	34	Neural
YX_1009901006_G21	30	Neoblast
YX_1009901006_G22	22	Muscle
YX_1009901006_G24	5	Cathepsin
YX_1009901006_G4	6	Muscle
YX_1009901006_G5	14	Neural
YX_1009901006_G6	6	Muscle
YX_1009901006_G7	7	Neural
YX_1009901006_G9	30	Neoblast
YX_1009901006_H1	5	Cathepsin
YX_1009901006_H10	25	Parenchymal
YX_1009901006_H11	0	Muscle
YX_1009901006_H12	23	Epidermal_prog1
YX_1009901006_H13	0	Muscle
YX_1009901006_H14	10	Muscle
YX_1009901006_H16	18	Neural
YX_1009901006_H17	2	Cathepsin
YX_1009901006_H18	2	Cathepsin
YX_1009901006_H2	24	Epidermal_prog2
YX_1009901006_H20	0	Muscle
YX_1009901006_H21	3	Parenchymal
YX_1009901006_H23	3	Parenchymal
YX_1009901006_H24	15	Neoblast
YX_1009901006_H4	4	Neoblast
YX_1009901006_H7	20	Neural
YX_1009901006_H8	3	Parenchymal
YX_1009901006_H9	6	Muscle
YX_1009901006_I1	19	Neural
YX_1009901006_I10	5	Cathepsin
YX_1009901006_I11	7	Neural
YX_1009901006_I12	1	Neoblast
YX_1009901006_I13	36	Neural
YX_1009901006_I14	11	Parenchymal
YX_1009901006_I15	4	Neoblast
YX_1009901006_I16	4	Neoblast
YX_1009901006_I18	4	Neoblast
YX_1009901006_I20	26	Neoblast
YX_1009901006_I21	42	Neural
YX_1009901006_I22	1	Neoblast
YX_1009901006_I23	4	Neoblast
YX_1009901006_I3	1	Neoblast
YX_1009901006_I4	0	Muscle
YX_1009901006_I6	5	Cathepsin
YX_1009901006_I7	12	Muscle
YX_1009901006_I8	16	Epidermal2
YX_1009901006_I9	15	Neoblast
YX_1009901006_J1	13	Muscle
YX_1009901006_J11	20	Neural
YX_1009901006_J14	1	Neoblast
YX_1009901006_J18	0	Muscle
YX_1009901006_J2	21	Parenchymal
YX_1009901006_J20	20	Neural
YX_1009901006_J21	12	Muscle
YX_1009901006_J22	7	Neural
YX_1009901006_J23	0	Muscle
YX_1009901006_J24	20	Neural
YX_1009901006_J3	6	Muscle
YX_1009901006_J4	24	Epidermal_prog1
YX_1009901006_J6	0	Muscle
YX_1009901006_J8	0	Muscle
YX_1009901006_J9	9	Muscle
YX_1009901006_K1	24	Parenchymal
YX_1009901006_K11	18	Neural
YX_1009901006_K12	4	Neoblast
YX_1009901006_K13	1	Neoblast
YX_1009901006_K15	1	Neoblast
YX_1009901006_K18	25	Neoblast
YX_1009901006_K2	33	Parenchymal
YX_1009901006_K20	39	Gland
YX_1009901006_K4	6	Muscle
YX_1009901006_K8	19	Parenchymal
YX_1009901006_L1	14	Neural
YX_1009901006_L11	0	Muscle
YX_1009901006_L14	16	Epidermal1
YX_1009901006_L15	24	Epidermal_prog2
YX_1009901006_L16	20	Neural
YX_1009901006_L19	0	Muscle
YX_1009901006_L2	3	Parenchymal
YX_1009901006_L21	4	Neoblast
YX_1009901006_L22	8	Epidermal_prog2
YX_1009901006_L23	20	Neural
YX_1009901006_L5	2	Parenchymal
YX_1009901006_L6	1	Neoblast
YX_1009901006_L7	15	Neoblast
YX_1009901006_L8	16	Epidermal_prog1
YX_1009901006_M1	38	Muscle
YX_1009901006_M12	32	Intestine
YX_1009901006_M13	3	Parenchymal
YX_1009901006_M14	9	Muscle
YX_1009901006_M15	15	Neoblast
YX_1009901006_M16	18	Neural
YX_1009901006_M17	22	Muscle
YX_1009901006_M18	16	Epidermal1
YX_1009901006_M2	9	Muscle
YX_1009901006_M21	13	Muscle
YX_1009901006_M22	29	Muscle
YX_1009901006_M24	13	Muscle
YX_1009901006_M3	3	Parenchymal
YX_1009901006_M4	0	Muscle
YX_1009901006_M5	36	Neural
YX_1009901006_M6	16	Epidermal1
YX_1009901006_M7	14	Neural
YX_1009901006_M8	42	Neural
YX_1009901006_M9	22	Muscle
YX_1009901006_N1	16	Epidermal1
YX_1009901006_N10	18	Neural
YX_1009901006_N12	4	Neoblast
YX_1009901006_N13	3	Parenchymal
YX_1009901006_N14	20	Neural
YX_1009901006_N16	0	Muscle
YX_1009901006_N18	18	Neural
YX_1009901006_N19	1	Neoblast
YX_1009901006_N2	18	Neural
YX_1009901006_N20	10	Muscle
YX_1009901006_N21	16	Epidermal2
YX_1009901006_N23	6	Muscle
YX_1009901006_N24	22	Muscle
YX_1009901006_N4	19	Parenchymal
YX_1009901006_N5	0	Muscle
YX_1009901006_N6	18	Muscle
YX_1009901006_N7	23	Epidermal_prog1
YX_1009901006_N9	1	Neoblast
YX_1009901006_O10	24	Parenchymal
YX_1009901006_O11	23	Epidermal_prog1
YX_1009901006_O12	12	Muscle
YX_1009901006_O13	23	Epidermal_prog1
YX_1009901006_O14	2	Cathepsin
YX_1009901006_O15	0	Muscle
YX_1009901006_O16	6	Muscle
YX_1009901006_O17	0	Muscle
YX_1009901006_O18	16	Epidermal1
YX_1009901006_O19	29	Neoblast
YX_1009901006_O20	38	Muscle
YX_1009901006_O22	18	Neural
YX_1009901006_O23	20	Neural
YX_1009901006_O3	3	Parenchymal
YX_1009901006_O4	2	Cathepsin
YX_1009901006_O5	1	Neoblast
YX_1009901006_O6	4	Neoblast
YX_1009901006_O7	43	Flame cells
YX_1009901006_O9	38	Muscle
YX_1009901006_P10	30	Neoblast
YX_1009901006_P11	31	Neural
YX_1009901006_P12	6	Muscle
YX_1009901006_P13	10	Muscle
YX_1009901006_P15	32	Intestine
YX_1009901006_P16	9	Muscle
YX_1009901006_P18	20	Neural
YX_1009901006_P2	21	Parenchymal
YX_1009901006_P3	22	Muscle
YX_1009901006_P4	22	Muscle
YX_1009901006_P5	22	Muscle
YX_1009901006_P6	39	Neoblast
YX_1009901006_P8	39	Muscle
YX_1009901007_A1	18	Parenchymal
YX_1009901007_A10	15	Neoblast
YX_1009901007_A12	19	Parenchymal
YX_1009901007_A15	3	Parenchymal
YX_1009901007_A17	3	Parenchymal
YX_1009901007_A19	0	Muscle
YX_1009901007_A2	17	Neural
YX_1009901007_A24	9	Muscle
YX_1009901007_A3	11	Parenchymal
YX_1009901007_A4	3	Parenchymal
YX_1009901007_A5	18	Neural
YX_1009901007_A6	19	Parenchymal
YX_1009901007_A7	42	Neural
YX_1009901007_A8	24	Parenchymal
YX_1009901007_B11	10	Muscle
YX_1009901007_B12	30	Neoblast
YX_1009901007_B13	43	Flame cells
YX_1009901007_B15	14	Neural
YX_1009901007_B16	39	Gland
YX_1009901007_B17	1	Neoblast
YX_1009901007_B18	10	Muscle
YX_1009901007_B20	3	Parenchymal
YX_1009901007_B22	13	Muscle
YX_1009901007_B23	10	Muscle
YX_1009901007_B24	6	Muscle
YX_1009901007_B3	27	Neoblast
YX_1009901007_B4	14	Neural
YX_1009901007_C10	11	Parenchymal
YX_1009901007_C11	27	Neoblast
YX_1009901007_C12	36	Neural
YX_1009901007_C13	7	Neural
YX_1009901007_C14	22	Muscle
YX_1009901007_C16	1	Neoblast
YX_1009901007_C17	0	Muscle
YX_1009901007_C18	7	Neural
YX_1009901007_C19	18	Neural
YX_1009901007_C21	11	Parenchymal
YX_1009901007_C22	1	Neoblast
YX_1009901007_C24	12	Muscle
YX_1009901007_C3	19	Neural
YX_1009901007_C5	36	Neural
YX_1009901007_C9	1	Neoblast
YX_1009901007_D13	12	Muscle
YX_1009901007_D15	30	Neoblast
YX_1009901007_D17	13	Muscle
YX_1009901007_D18	7	Neural
YX_1009901007_D21	1	Neoblast
YX_1009901007_D24	31	Neural
YX_1009901007_D4	11	Parenchymal
YX_1009901007_D5	3	Parenchymal
YX_1009901007_D6	14	Neural
YX_1009901007_D7	8	Epidermal_prog3
YX_1009901007_D8	0	Muscle
YX_1009901007_D9	3	Parenchymal
YX_1009901007_E1	1	Neoblast
YX_1009901007_E12	11	Parenchymal
YX_1009901007_E13	7	Neural
YX_1009901007_E15	22	Muscle
YX_1009901007_E18	4	Neoblast
YX_1009901007_E19	9	Muscle
YX_1009901007_E20	45	Muscle
YX_1009901007_E21	12	Muscle
YX_1009901007_E22	3	Parenchymal
YX_1009901007_E24	0	Muscle
YX_1009901007_E3	6	Muscle
YX_1009901007_E6	12	Muscle
YX_1009901007_F1	16	Epidermal1
YX_1009901007_F11	22	Muscle
YX_1009901007_F14	25	Neoblast
YX_1009901007_F15	44	Neural
YX_1009901007_F16	7	Neural
YX_1009901007_F18	6	Muscle
YX_1009901007_F2	14	Neural
YX_1009901007_F20	26	Neoblast
YX_1009901007_F22	30	Neoblast
YX_1009901007_F23	30	Neoblast
YX_1009901007_F24	18	Neural
YX_1009901007_F3	4	Neoblast
YX_1009901007_F4	31	Parenchymal
YX_1009901007_F5	13	Muscle
YX_1009901007_F6	10	Muscle
YX_1009901007_F7	14	Neural
YX_1009901007_F8	21	Parenchymal
YX_1009901007_F9	17	Neural
YX_1009901007_G1	26	Neoblast
YX_1009901007_G10	18	Neural
YX_1009901007_G11	0	Muscle
YX_1009901007_G12	2	Parenchymal
YX_1009901007_G15	1	Neoblast
YX_1009901007_G16	13	Muscle
YX_1009901007_G17	14	Neural
YX_1009901007_G18	16	Epidermal3
YX_1009901007_G2	17	Parenchymal
YX_1009901007_G20	8	Epidermal_prog3
YX_1009901007_G22	31	Neural
YX_1009901007_G23	1	Neoblast
YX_1009901007_G24	35	Neural
YX_1009901007_G3	13	Muscle
YX_1009901007_G5	5	Cathepsin
YX_1009901007_G7	13	Muscle
YX_1009901007_G8	32	Neoblast
YX_1009901007_H1	9	Muscle
YX_1009901007_H10	2	Parenchymal
YX_1009901007_H11	39	Muscle
YX_1009901007_H12	20	Neural
YX_1009901007_H13	21	Parenchymal
YX_1009901007_H14	0	Muscle
YX_1009901007_H15	1	Neoblast
YX_1009901007_H16	37	Cathepsin
YX_1009901007_H17	37	Cathepsin
YX_1009901007_H18	9	Muscle
YX_1009901007_H19	3	Parenchymal
YX_1009901007_H20	22	Muscle
YX_1009901007_H22	1	Neoblast
YX_1009901007_H23	12	Muscle
YX_1009901007_H24	1	Neoblast
YX_1009901007_H3	3	Parenchymal
YX_1009901007_H5	42	Neural
YX_1009901007_H6	9	Muscle
YX_1009901007_H7	14	Neural
YX_1009901007_H8	0	Muscle
YX_1009901007_I1	21	Parenchymal
YX_1009901007_I10	13	Muscle
YX_1009901007_I11	4	Neoblast
YX_1009901007_I15	0	Muscle
YX_1009901007_I16	31	Parenchymal
YX_1009901007_I18	15	Neoblast
YX_1009901007_I19	0	Muscle
YX_1009901007_I22	0	Muscle
YX_1009901007_I23	44	Neural
YX_1009901007_I24	14	Neoblast
YX_1009901007_I4	3	Parenchymal
YX_1009901007_I5	18	Neural
YX_1009901007_I6	26	Neoblast
YX_1009901007_I7	8	Epidermal_prog3
YX_1009901007_I8	0	Muscle
YX_1009901007_I9	7	Neural
YX_1009901007_J1	27	Neoblast
YX_1009901007_J10	0	Muscle
YX_1009901007_J12	1	Neoblast
YX_1009901007_J13	25	Neoblast
YX_1009901007_J14	29	Neoblast
YX_1009901007_J15	6	Muscle
YX_1009901007_J16	0	Muscle
YX_1009901007_J17	9	Muscle
YX_1009901007_J18	14	Neural
YX_1009901007_J19	23	Epidermal_prog1
YX_1009901007_J22	2	Cathepsin
YX_1009901007_J23	14	Neural
YX_1009901007_J24	14	Neural
YX_1009901007_J3	2	Cathepsin
YX_1009901007_J4	16	Epidermal3
YX_1009901007_J5	42	Neural
YX_1009901007_J6	14	Neural
YX_1009901007_J7	1	Neoblast
YX_1009901007_J8	3	Parenchymal
YX_1009901007_K1	9	Muscle
YX_1009901007_K10	0	Muscle
YX_1009901007_K12	15	Neoblast
YX_1009901007_K13	28	Neural
YX_1009901007_K14	1	Neoblast
YX_1009901007_K15	28	Neural
YX_1009901007_K16	7	Neural
YX_1009901007_K17	1	Neoblast
YX_1009901007_K19	6	Muscle
YX_1009901007_K2	4	Neoblast
YX_1009901007_K20	1	Neoblast
YX_1009901007_K21	2	Cathepsin
YX_1009901007_K22	15	Neoblast
YX_1009901007_K23	9	Muscle
YX_1009901007_K3	11	Parenchymal
YX_1009901007_K6	12	Muscle
YX_1009901007_K7	7	Neural
YX_1009901007_K8	2	Cathepsin
YX_1009901007_K9	19	Neural
YX_1009901007_L11	26	Neoblast
YX_1009901007_L12	12	Muscle
YX_1009901007_L13	15	Neoblast
YX_1009901007_L14	10	Muscle
YX_1009901007_L15	14	Neural
YX_1009901007_L16	16	Epidermal1
YX_1009901007_L17	23	Epidermal_prog1
YX_1009901007_L19	22	Muscle
YX_1009901007_L2	15	Neoblast
YX_1009901007_L20	3	Parenchymal
YX_1009901007_L21	0	Muscle
YX_1009901007_L22	24	Parenchymal
YX_1009901007_L23	4	Neoblast
YX_1009901007_L3	7	Neural
YX_1009901007_L5	45	Muscle
YX_1009901007_L7	23	Epidermal_prog1
YX_1009901007_L8	3	Parenchymal
YX_1009901007_L9	0	Muscle
YX_1009901007_M1	13	Muscle
YX_1009901007_M10	3	Parenchymal
YX_1009901007_M11	8	Epidermal_prog3
YX_1009901007_M12	0	Muscle
YX_1009901007_M13	3	Parenchymal
YX_1009901007_M15	46	Parenchymal
YX_1009901007_M16	11	Parenchymal
YX_1009901007_M17	23	Epidermal_prog1
YX_1009901007_M18	4	Neoblast
YX_1009901007_M19	41	Muscle
YX_1009901007_M2	6	Muscle
YX_1009901007_M21	38	Muscle
YX_1009901007_M23	21	Parenchymal
YX_1009901007_M24	2	Parenchymal
YX_1009901007_M3	7	Neural
YX_1009901007_M4	6	Muscle
YX_1009901007_M5	22	Muscle
YX_1009901007_M6	6	Muscle
YX_1009901007_M8	12	Muscle
YX_1009901007_M9	4	Neoblast
YX_1009901007_N1	3	Parenchymal
YX_1009901007_N10	2	Cathepsin
YX_1009901007_N11	33	Neural_KK7
YX_1009901007_N12	0	Muscle
YX_1009901007_N13	4	Neoblast
YX_1009901007_N14	3	Parenchymal
YX_1009901007_N16	7	Neural
YX_1009901007_N17	8	Epidermal1
YX_1009901007_N18	27	Neoblast
YX_1009901007_N19	5	Cathepsin
YX_1009901007_N2	1	Neoblast
YX_1009901007_N20	0	Muscle
YX_1009901007_N23	9	Muscle
YX_1009901007_N24	7	Neural
YX_1009901007_N3	12	Muscle
YX_1009901007_N4	13	Muscle
YX_1009901007_N5	13	Muscle
YX_1009901007_N6	5	Cathepsin
YX_1009901007_N7	22	Muscle
YX_1009901007_N8	3	Parenchymal
YX_1009901007_N9	38	Muscle
YX_1009901007_O1	24	Parenchymal
YX_1009901007_O12	46	Parenchymal
YX_1009901007_O13	26	Neoblast
YX_1009901007_O16	6	Muscle
YX_1009901007_O17	24	Epidermal_prog1
YX_1009901007_O18	23	Epidermal_prog1
YX_1009901007_O19	6	Muscle
YX_1009901007_O2	29	Neoblast
YX_1009901007_O20	10	Muscle
YX_1009901007_O21	10	Muscle
YX_1009901007_O3	12	Muscle
YX_1009901007_O4	6	Muscle
YX_1009901007_O5	32	Intestine
YX_1009901007_O6	19	Parenchymal
YX_1009901007_O7	19	Parenchymal
YX_1009901007_O8	1	Neoblast
YX_1009901007_O9	4	Neoblast
YX_1009901007_P10	21	Parenchymal
YX_1009901007_P15	21	Parenchymal
YX_1009901007_P17	9	Muscle
YX_1009901007_P2	4	Neoblast
YX_1009901007_P21	0	Muscle
YX_1009901007_P23	22	Muscle
YX_1009901007_P4	0	Muscle
YX_1009901007_P8	1	Neoblast
YX_1009901007_P9	2	Cathepsin
YX_1009901008_A11	12	Muscle
YX_1009901008_A12	1	Neoblast
YX_1009901008_A14	1	Neoblast
YX_1009901008_A15	23	Epidermal_prog1
YX_1009901008_A16	26	Neoblast
YX_1009901008_A17	10	Muscle
YX_1009901008_A18	18	Neural
YX_1009901008_A19	2	Cathepsin
YX_1009901008_A20	17	Neural
YX_1009901008_A21	6	Muscle
YX_1009901008_A22	16	Epidermal1
YX_1009901008_A23	14	Parenchymal
YX_1009901008_A24	4	Neoblast
YX_1009901008_A3	2	Parenchymal
YX_1009901008_A4	0	Muscle
YX_1009901008_A6	0	Muscle
YX_1009901008_A9	23	Epidermal_prog1
YX_1009901008_B1	2	Cathepsin
YX_1009901008_B10	36	Neural
YX_1009901008_B11	26	Neoblast
YX_1009901008_B12	14	Neural
YX_1009901008_B13	31	Neural
YX_1009901008_B14	47	Parenchymal
YX_1009901008_B16	19	Parenchymal
YX_1009901008_B18	14	Neural
YX_1009901008_B19	27	Neoblast
YX_1009901008_B2	38	Muscle
YX_1009901008_B21	11	Parenchymal
[truncated: 5,658 more rows]

## Sheet: Danio rerio
Cell name	Leiden cluster	Cell type (original)	Cell type (in this study)	Developmental stage (hpf)
DEW046_AAATCAGA_GGCGGTTT	14	tailbud - spinal cord	ZF_Tailbud	8
DEW046_TGACTGTTCTT_AAGATTGT	14	epidermal	ZF_Non-neural ectoderm	8
DEW046_AATGGATTA_TAACCCGT	2	neural plate - anterior	ZF_Neuroectoderm	8
DEW046_TGATCCAGTCC_TTAAACTG	11	mesoderm - lateral plate	ZF_Intermediate mesoderm	8
DEW046_GATGCCATCG_GGCCTAAG	14	tailbud - spinal cord	ZF_Tailbud	8
DEW046_TGAGCGCATTC_AAACTCGA	14	tailbud - spinal cord	ZF_Tailbud	8
DEW046_AGTCAAAGA_CGATTGAT	14	tailbud - spinal cord	ZF_Tailbud	8
DEW046_TAAATAGG_ACCCATAT	22	neural plate - posterior	ZF_Neuroectoderm	8
DEW046_GATCGGTTTA_ATTCAGTA	22	neural plate - posterior	ZF_Neuroectoderm	8
DEW046_TGATGTTTGAG_TTAAACTG	14	tailbud - spinal cord	ZF_Tailbud	8
DEW046_AACGAAACG_TAAGACGG	22	tailbud - spinal cord	ZF_Tailbud	8
DEW046_ACCGCAACT_TGATAACA	14	epidermal	ZF_Non-neural ectoderm	8
DEW046_GAATGGAAAT_CTACGAGC	2	neural plate - anterior	ZF_Neuroectoderm	8
DEW046_CTTACGGG_AGCTACGG	2	neural plate - anterior	ZF_Neuroectoderm	8
DEW046_TGATGTTTGAG_ACTAGCCA	2	neural plate - anterior	ZF_Neuroectoderm	8
DEW046_TGAATGCATGG_CCGTGTTT	22	tailbud - spinal cord	ZF_Tailbud	8
DEW046_AAATCGGGT_TTCGGCCT	14	epidermal	ZF_Non-neural ectoderm	8
DEW046_ACTACTTGT_GTCGTCGT	2	neural plate - anterior	ZF_Neuroectoderm	8
DEW046_ACGGAATTT_CTGTCTGG	11	tailbud - PSM	ZF_Presomitic mesoderm	8
DEW046_TGAGACAACTT_CGGCACAT	63	prechordal plate	ZF_Dorsal organizer	8
DEW046_ACGTGGATA_TGACGGAC	2	neural plate - posterior	ZF_Neuroectoderm	8
DEW046_TGACTCAGAAT_TAGCCTCG	14	tailbud - spinal cord	ZF_Tailbud	8
DEW046_GAGAAAGACC_AGCACCAC	2	neural plate - anterior	ZF_Neuroectoderm	8
DEW046_GGGTTGGT_AAGCGTAC	14	epidermal	ZF_Non-neural ectoderm	8
DEW046_GAAGTGATGC_CGGGTAGT	14	tailbud - spinal cord	ZF_Tailbud	8
DEW046_GATTGATCTA_CTTTCTTT	2	apoptotic-like	ZF_Apoptotic-like	8
DEW046_ACGGAATTT_TTCGGCCT	14	tailbud - spinal cord	ZF_Tailbud	8
DEW046_GACAAGAGGG_GCCAAGAT	14	tailbud - spinal cord	ZF_Tailbud	8
DEW046_ACTAGATTG_AAACAGGG	2	neural plate - anterior	ZF_Neuroectoderm	8
DEW046_GAGGTCCCTT_TCTAGCAG	14	epidermal	ZF_Non-neural ectoderm	8
DEW046_AAATCAGA_CTGCGTTG	2	neural plate - anterior	ZF_Neuroectoderm	8
DEW046_CCCAAGCA_GGCCTAAG	11	tailbud - PSM	ZF_Presomitic mesoderm	8
DEW046_AACTGAGTT_AAGCTTCT	22	tailbud - spinal cord	ZF_Tailbud	8
DEW046_TCGAAGCT_GGGAACCT	11	tailbud - PSM	ZF_Presomitic mesoderm	8
DEW046_ATTGGATCG_TAAATAGG	2	neural plate - posterior	ZF_Neuroectoderm	8
DEW046_GTGTAACC_TCGACGGT	65	endoderm	ZF_Endoderm	8
DEW046_TGATGTTTGAG_ACGAAACG	14	epidermal	ZF_Non-neural ectoderm	8
DEW046_TTGGACTT_ACCTTGCC	63	tailbud - spinal cord	ZF_Tailbud	8
DEW046_GAGATTGCGA_CTTGGTGT	2	neural plate - anterior	ZF_Neuroectoderm	8
DEW046_TGAAACAATCC_TTTGTGTC	11	tailbud - PSM	ZF_Presomitic mesoderm	8
DEW046_AAATCGGGT_AACTTAGC	14	epidermal	ZF_Non-neural ectoderm	8
DEW046_GCTTACCT_AGGAGCTT	14	tailbud - spinal cord	ZF_Tailbud	8
DEW046_CTTACGGG_TCGGTTTA	11	tailbud - PSM	ZF_Presomitic mesoderm	8
DEW046_AATATCTTC_CTTCGCAC	2	neural plate - anterior	ZF_Neuroectoderm	8
DEW046_TGACTTCTGGA_GCACCTCT	2	neural plate - anterior	ZF_Neuroectoderm	8
DEW046_TGAAGCGTAGG_AGGATTCA	11	mesoderm - adaxial cells	ZF_Presomitic mesoderm	8
DEW046_CGGCTTAC_AAGATTGT	14	epidermal	ZF_Non-neural ectoderm	8
DEW046_AATACTCTT_GGCGTTAG	11	tailbud - spinal cord	ZF_Tailbud	8
DEW046_ATCGGTTCG_CTGTCTGG	2	neural plate - posterior	ZF_Neuroectoderm	8
DEW046_GATCGTTT_TTAGGACC	11	mesoderm - lateral plate	ZF_Intermediate mesoderm	8
DEW046_TGACTACCGTT_AGCGCGAT	11	tailbud - PSM	ZF_Presomitic mesoderm	8
DEW046_GACCTGACAC_CACAGTTT	14	epidermal	ZF_Non-neural ectoderm	8
DEW046_AGGTCACAG_GGCGGTTT	14	epidermal	ZF_Non-neural ectoderm	8
DEW046_GCTTTGGC_GTTCAACT	2	neural plate - anterior	ZF_Neuroectoderm	8
DEW046_TTGCATAT_CGAGATGT	2	neural plate - anterior	ZF_Neuroectoderm	8
DEW046_CCGCTGTT_TGGTTTCT	14	tailbud - spinal cord	ZF_Tailbud	8
DEW046_ACTTAGGTA_AAACTCGA	11	tailbud - PSM	ZF_Presomitic mesoderm	8
DEW046_AGGTCACAG_CTTTAATC	63	prechordal plate	ZF_Dorsal organizer	8
DEW046_AACGAAACG_GAGTTCAC	2	neural plate - posterior	ZF_Neuroectoderm	8
DEW046_TGACTCGCGTA_CCCGACTT	2	neural plate - anterior	ZF_Neuroectoderm	8
DEW046_GACGATTGAT_TGTAAAGG	2	neural plate - posterior	ZF_Neuroectoderm	8
DEW046_GAGTTGTCAT_GAGAGTAT	14	neural plate - anterior	ZF_Neuroectoderm	8
DEW046_GATGGAGGAG_GATTAGAC	22	tailbud - spinal cord	ZF_Tailbud	8
DEW046_GGAGAAGC_AGGCAGTT	2	apoptotic-like	ZF_Apoptotic-like	8
DEW046_TGATGTTTGAG_CGGAATTT	2	neural plate - anterior	ZF_Neuroectoderm	8
DEW046_TGAATGACTTT_GAAGCACT	22	neural plate - posterior	ZF_Neuroectoderm	8
DEW046_TGAGGAATAGA_CGGCACAT	11	mesoderm - lateral plate	ZF_Intermediate mesoderm	8
DEW046_GATGTGCTCA_GTGTCGGA	22	tailbud - spinal cord	ZF_Tailbud	8
DEW046_TGATTCACATA_ATACTCTT	14	neural plate - anterior	ZF_Neuroectoderm	8
DEW046_TGATCGACACC_CCCATCTG	14	apoptotic-like	ZF_Apoptotic-like	8
DEW046_AATACTCTT_TCTAGCAG	22	neural plate - posterior	ZF_Neuroectoderm	8
DEW046_GAGATCTCGG_GATGTATT	11	apoptotic-like 2	ZF_Apoptotic-like 2	8
DEW046_TGAAAACAGGG_GTTTGTTT	22	tailbud - spinal cord	ZF_Tailbud	8
DEW046_GAGGGAGGTA_ATGTTGGC	11	tailbud - PSM	ZF_Presomitic mesoderm	8
DEW046_AAAATCGTT_TCGGTTTA	63	notocord	ZF_Notochord	8
DEW046_TGAGCGCATTC_CATTTGTT	2	neural plate - anterior	ZF_Neuroectoderm	8
DEW046_TTGGACTT_TCCAGGGA	11	tailbud - PSM	ZF_Presomitic mesoderm	8
DEW046_ATCAGCGC_CACTCCTC	11	tailbud - PSM	ZF_Presomitic mesoderm	8
DEW046_GATGTACACG_AACAATCC	2	neural plate - anterior	ZF_Neuroectoderm	8
DEW046_TGAATGAAGCA_AAAGCCTA	2	neural plate - anterior	ZF_Neuroectoderm	8
DEW046_ATTGATTCT_TCGGTTCG	22	tailbud - spinal cord	ZF_Tailbud	8
DEW046_TGACCTGTTAT_CTCCGCAT	14	epidermal	ZF_Non-neural ectoderm	8
DEW046_GACGGGCTTT_ATTTCCGG	22	tailbud - spinal cord	ZF_Tailbud	8
DEW046_GACCCTTCAG_GATTTACC	14	tailbud - spinal cord	ZF_Tailbud	8
DEW046_AACTGAGTT_CTCGCGTA	11	mesoderm - lateral plate	ZF_Intermediate mesoderm	8
DEW046_ACACTCCTC_GAGTTTCG	2	neural plate - anterior	ZF_Neuroectoderm	8
DEW046_GATGACGGAC_CAATACTT	14	epidermal	ZF_Non-neural ectoderm	8
DEW046_AATCCCACG_TGCTATTT	14	epidermal	ZF_Non-neural ectoderm	8
DEW046_GAGCGTTGCT_TTCGCTGG	11	tailbud - PSM	ZF_Presomitic mesoderm	8
DEW046_GATGTGCTCA_TTGTCGCC	2	neural plate - anterior	ZF_Neuroectoderm	8
DEW046_GGAAACAG_TCATCCTT	14	epidermal	ZF_Non-neural ectoderm	8
DEW046_ATCTGCATC_ACATCTAT	11	tailbud - PSM	ZF_Presomitic mesoderm	8
DEW046_ACTCCGCAT_ATCAGCGC	11	tailbud - PSM	ZF_Presomitic mesoderm	8
DEW046_ACGTGCTAG_TCCCGTAG	22	tailbud - spinal cord	ZF_Tailbud	8
DEW046_GAGCGGTA_GAAGTGCC	2	neural plate - posterior	ZF_Neuroectoderm	8
DEW046_AATGTTGGC_TGTAAAGG	2	neural plate - anterior	ZF_Neuroectoderm	8
DEW046_TACAGCCG_AAACAGGG	2	neural plate - posterior	ZF_Neuroectoderm	8
DEW046_ACCCTTGGT_GATTGCGA	2	neural plate - anterior	ZF_Neuroectoderm	8
DEW046_TGATTCACATA_AAACGCCT	2	neural plate - anterior	ZF_Neuroectoderm	8
DEW046_TGACATACATT_CTAGACCC	65	endoderm	ZF_Endoderm	8
DEW046_AAAACTCGA_GCCGGATT	2	neural plate - posterior	ZF_Neuroectoderm	8
DEW046_TGAAACCCTTG_TGGAGGAG	11	mesoderm - lateral plate	ZF_Intermediate mesoderm	8
DEW046_CTTACGGG_CGGCACAT	14	tailbud - spinal cord	ZF_Tailbud	8
DEW046_GATCGGTACG_TGTAAAGG	14	epidermal	ZF_Non-neural ectoderm	8
DEW046_TGACTCGCGTA_GTCCAAAG	14	epidermal	ZF_Non-neural ectoderm	8
DEW046_GATGACGGAC_TGGTATGA	11	tailbud - PSM	ZF_Presomitic mesoderm	8
DEW046_ATCTTTGT_AAGATTGT	2	neural plate - anterior	ZF_Neuroectoderm	8
DEW046_GATCCCAATC_TCACCGAG	14	epidermal	ZF_Non-neural ectoderm	8
DEW046_GAAGGCAGTT_CAAGAGGG	22	tailbud - spinal cord	ZF_Tailbud	8
DEW046_TGACTAGTAAC_TGGTTTCT	2	tailbud - spinal cord	ZF_Tailbud	8
DEW046_CGTATTTC_ACGGTAGC	22	tailbud - spinal cord	ZF_Tailbud	8
DEW046_GATTGAGGGT_CCCTAACC	11	tailbud - PSM	ZF_Presomitic mesoderm	8
DEW046_TGAACTAGCCA_AAACGCCT	14	neural plate - anterior	ZF_Neuroectoderm	8
DEW046_GACCCATAGC_CAGACCAT	14	tailbud - spinal cord	ZF_Tailbud	8
DEW046_AGCAGAAC_GAGAGTAT	11	tailbud - PSM	ZF_Presomitic mesoderm	8
DEW046_AGCACCAC_TGTGCTCA	2	neural plate - anterior	ZF_Neuroectoderm	8
DEW046_GAACACTAAG_AATTCCCA	14	epidermal	ZF_Non-neural ectoderm	8
DEW046_GATACAAACT_TCCAGGGA	11	tailbud - PSM	ZF_Presomitic mesoderm	8
DEW046_TGACTTCGCAC_GTTACCGC	14	epidermal	ZF_Non-neural ectoderm	8
DEW046_TGAATACCCAG_TGAGGTCT	2	neural plate - posterior	ZF_Neuroectoderm	8
DEW046_AGTCAAAGA_CTACGAGC	14	neural plate - anterior	ZF_Neuroectoderm	8
DEW046_GCTTACCT_ACCTTGCC	65	endoderm	ZF_Endoderm	8
DEW046_AGTCAAAGA_CTACCGTT	22	neural plate - posterior	ZF_Neuroectoderm	8
DEW046_TGAGGAATAGA_CTCAGAAT	63	prechordal plate	ZF_Dorsal organizer	8
DEW046_ATCGGTTCG_ATATGCAT	65	endoderm	ZF_Endoderm	8
DEW046_TGAATGACTTT_GAGTTTCG	22	tailbud - spinal cord	ZF_Tailbud	8
DEW046_TGAGGTCTGAC_CCCTAACC	2	neural plate - anterior	ZF_Neuroectoderm	8
DEW046_CGGCACAT_GGCTACTA	11	mesoderm - lateral plate	ZF_Intermediate mesoderm	8
DEW046_TGAGTTCTGTT_AAAGCCTA	63	notocord	ZF_Notochord	8
DEW046_GACCCGAATG_CAAGAGGG	2	neural plate - anterior	ZF_Neuroectoderm	8
DEW046_AGCTTTCCA_AGAAGTTA	63	prechordal plate	ZF_Dorsal organizer	8
DEW046_GAACTAGGAT_TTGTCGCC	11	tailbud - PSM	ZF_Presomitic mesoderm	8
DEW046_TAAATAGG_CGACTCCT	2	neural plate - anterior	ZF_Neuroectoderm	8
DEW046_GAAGGCAGTT_TTCCAGAC	14	epidermal	ZF_Non-neural ectoderm	8
DEW046_ATAGTGGAC_CGACGTCA	14	epidermal	ZF_Non-neural ectoderm	8
DEW046_TGACTGTTCTT_TCTGCATC	63	notocord	ZF_Notochord	8
DEW046_ACAGATTAC_TTCCGCTC	2	neural plate - anterior	ZF_Neuroectoderm	8
DEW046_GAGAATACGC_AAATCGTT	22	tailbud - spinal cord	ZF_Tailbud	8
DEW046_GATAAGACGG_GCAAAGCC	14	epidermal	ZF_Non-neural ectoderm	8
DEW046_TGACAACAAAT_TTGGATCG	63	notocord	ZF_Notochord	8
DEW046_TGATGTTTGAG_TTGATTCT	22	neural plate - posterior	ZF_Neuroectoderm	8
DEW046_TGCGACAG_ACCTTGCC	14	tailbud - spinal cord	ZF_Tailbud	8
DEW046_ACTTAGGTA_TGACCAGT	63	notocord	ZF_Notochord	8
DEW046_AGCACCTCT_GGGAAATC	11	tailbud - PSM	ZF_Presomitic mesoderm	8
DEW046_AATCCCACG_GACAAAGG	22	tailbud - spinal cord	ZF_Tailbud	8
DEW046_GAGAATTCGT_TGCTCCGT	14	epidermal	ZF_Non-neural ectoderm	8
DEW046_TGAGCGCATTC_CTTCAGGT	14	epidermal	ZF_Non-neural ectoderm	8
DEW046_TGACACAACAG_AAGGTAAT	22	neural plate - posterior	ZF_Neuroectoderm	8
DEW046_AGAACGATT_ATTCAGTA	14	neural plate - anterior	ZF_Neuroectoderm	8
DEW046_GACAATTAGT_TGTGCTCA	2	neural plate - posterior	ZF_Neuroectoderm	8
DEW046_ATAGTGGAC_AAACTGGT	2	neural plate - anterior	ZF_Neuroectoderm	8
DEW046_ATCCGCTA_CGTGGATA	2	neural plate - anterior	ZF_Neuroectoderm	8
DEW046_AATCCCACG_AACCCTTG	11	tailbud - PSM	ZF_Presomitic mesoderm	8
DEW046_GACCCGAATG_TTGGACTT	2	neural plate - anterior	ZF_Neuroectoderm	8
DEW046_AAAGTAATC_ACGCCATT	14	tailbud - spinal cord	ZF_Tailbud	8
DEW046_AGTTTACGT_CTTTCTTT	2	neural plate - anterior	ZF_Neuroectoderm	8
DEW046_TTCGGCCT_TGACGGAC	22	tailbud - spinal cord	ZF_Tailbud	8
DEW046_ACCCACGA_TGATGCCC	11	tailbud - PSM	ZF_Presomitic mesoderm	8
DEW046_ATCCGCTA_GGAATAGA	14	epidermal	ZF_Non-neural ectoderm	8
DEW046_GAGAATTCGT_CGAGATGT	14	tailbud - spinal cord	ZF_Tailbud	8
DEW046_AGTCAAAGA_CCTGACAC	14	tailbud - spinal cord	ZF_Tailbud	8
DEW046_GACCTACTAG_GCATGGGT	2	neural plate - anterior	ZF_Neuroectoderm	8
DEW046_TGAGCCACATC_CCCTTCAG	14	tailbud - spinal cord	ZF_Tailbud	8
DEW046_ATCCGCTA_AGATGGCT	2	neural plate - anterior	ZF_Neuroectoderm	8
DEW046_TGACTAGTAAC_GAGCCCAT	2	neural plate - anterior	ZF_Neuroectoderm	8
DEW046_TGACTTCGCAC_CGTGCTAG	22	tailbud - spinal cord	ZF_Tailbud	8
DEW046_AGTCAATAC_ATATGCAT	63	notocord	ZF_Notochord	8
DEW046_GAAGTTTAGA_TGCGACAG	22	neural plate - posterior	ZF_Neuroectoderm	8
DEW046_TGAAGAAGTTA_TTGTCGCC	22	tailbud - spinal cord	ZF_Tailbud	8
DEW046_CGTATTTC_CAAGAGGG	65	neural plate - anterior	ZF_Neuroectoderm	8
DEW046_TGACTTGGTGT_AGGTTGTG	14	epidermal	ZF_Non-neural ectoderm	8
DEW046_TGAATACCCAG_CCCGACTT	65	endoderm	ZF_Endoderm	8
DEW046_GATACCAGGC_TGTAAAGG	2	neural plate - anterior	ZF_Neuroectoderm	8
DEW046_TGATACGTGCT_GTACCTTG	2	neural plate - anterior	ZF_Neuroectoderm	8
DEW046_GACACGGACT_GTCCAAAG	11	mesoderm - lateral plate	ZF_Intermediate mesoderm	8
DEW046_GATTGGCGTT_TGTGGCTA	2	neural plate - anterior	ZF_Neuroectoderm	8
DEW046_TGAGCCGGATT_CCCTTCAG	2	neural plate - anterior	ZF_Neuroectoderm	8
DEW046_TGAGATTTACC_TCGAAGCT	63	neural plate - anterior	ZF_Neuroectoderm	8
DEW046_TGACAAGTCAT_GCACCTCT	2	neural plate - posterior	ZF_Neuroectoderm	8
DEW046_TGATACGTGCT_TGAGGTCT	11	tailbud - PSM	ZF_Presomitic mesoderm	8
DEW046_GAAGGAAGAC_GACGATGG	2	neural plate - anterior	ZF_Neuroectoderm	8
DEW046_GACGTACCTA_TCGACGGT	2	neural plate - anterior	ZF_Neuroectoderm	8
DEW046_TGAGACAACTT_AAACGCCT	14	tailbud - spinal cord	ZF_Tailbud	8
DEW046_GACAGTCCCT_GCAGTCGA	65	endoderm	ZF_Endoderm	8
DEW046_AGAAGTGCC_ATCCGCTA	2	neural plate - anterior	ZF_Neuroectoderm	8
DEW046_GACTTACTCC_GGATAAAG	14	epidermal	ZF_Non-neural ectoderm	8
DEW046_TGAGTTCTGTT_AAACTGGT	11	tailbud - PSM	ZF_Presomitic mesoderm	8
DEW046_GATCCCAATC_CGGCTTAC	2	neural plate - anterior	ZF_Neuroectoderm	8
DEW046_ACTAGATTG_ATTCAGTA	2	neural plate - anterior	ZF_Neuroectoderm	8
DEW046_TGAGGCTACTA_GAGGCTGA	11	mesoderm - lateral plate	ZF_Intermediate mesoderm	8
DEW046_AATTCAGTA_GTCTCTCT	2	neural plate - posterior	ZF_Neuroectoderm	8
DEW046_ACCCTAACC_CAACGTGG	22	tailbud - spinal cord	ZF_Tailbud	8
DEW046_TTTGTGTC_AACAATCC	14	epidermal	ZF_Non-neural ectoderm	8
DEW046_GACATCTCCC_TAACTACT	2	neural plate - anterior	ZF_Neuroectoderm	8
DEW046_TGATGTCTTTC_CGTATTTC	63	prechordal plate	ZF_Dorsal organizer	8
DEW046_TCCTTATT_TGGCCTGT	14	epidermal	ZF_Non-neural ectoderm	8
DEW046_CTATAGAG_ATGACTTT	63	notocord	ZF_Notochord	8
DEW046_TACTTGTG_CGTAGAAG	11	tailbud - PSM	ZF_Presomitic mesoderm	8
DEW046_TGAAAACAGGG_TCTAGCAG	63	notocord	ZF_Notochord	8
DEW046_ACAGGTGTC_TTAAACTG	2	neural plate - anterior	ZF_Neuroectoderm	8
DEW046_AGTGTCGGA_CCGTGTTT	2	neural plate - anterior	ZF_Neuroectoderm	8
DEW046_CCCATCTG_TATTGCCT	14	epidermal	ZF_Non-neural ectoderm	8
DEW046_AGTTACCGC_AAGATTGT	2	neural plate - anterior	ZF_Neuroectoderm	8
DEW046_TGAAACCCTTG_TTGATTCT	2	neural plate - anterior	ZF_Neuroectoderm	8
DEW046_TAGCTTAT_GTTGCACG	2	neural plate - anterior	ZF_Neuroectoderm	8
DEW046_GAACGCCATT_GCAAGGAC	22	tailbud - spinal cord	ZF_Tailbud	8
DEW046_GAAGTGATGC_AGTTTAGA	2	neural plate - anterior	ZF_Neuroectoderm	8
DEW046_ATCGGTTCG_GCGCATTC	11	mesoderm - lateral plate	ZF_Intermediate mesoderm	8
DEW046_ACCCTTGGT_AATGTTTG	22	neural plate - posterior	ZF_Neuroectoderm	8
DEW046_TAGCTTAT_CTCAGAAT	2	neural plate - anterior	ZF_Neuroectoderm	8
DEW046_ATTCCAGAC_GGCATGCT	14	epidermal	ZF_Non-neural ectoderm	8
DEW046_ATCATGAGG_ACCCATAT	2	neural plate - anterior	ZF_Neuroectoderm	8
DEW046_TGAACATCTAT_CAGACCAT	14	epidermal	ZF_Non-neural ectoderm	8
DEW046_TGATCCAGTCC_AGCTACGG	22	neural plate - posterior	ZF_Neuroectoderm	8
DEW046_TGATGCCC_GCAGCATG	2	neural plate - anterior	ZF_Neuroectoderm	8
DEW046_AGCCTCTTT_CTGAGTGC	2	neural plate - anterior	ZF_Neuroectoderm	8
DEW046_AGGCAACG_ATGGATTA	22	tailbud - spinal cord	ZF_Tailbud	8
DEW046_ACCATTTGA_GCAGGGTA	2	neural plate - posterior	ZF_Neuroectoderm	8
DEW046_CTTTCTTT_CTACGAGC	2	neural plate - anterior	ZF_Neuroectoderm	8
DEW046_TGAAAACTGGT_ACTTCAAT	65	endoderm	ZF_Endoderm	8
DEW046_GAGCGTTGCT_ATCCCACG	22	neural plate - posterior	ZF_Neuroectoderm	8
DEW046_GGCATGCT_AAAGCCTA	2	neural plate - posterior	ZF_Neuroectoderm	8
DEW046_ACTGAGTGC_TGTCTTTC	2	neural plate - posterior	ZF_Neuroectoderm	8
DEW046_TGAATATAGGA_GATGTGAG	14	epidermal	ZF_Non-neural ectoderm	8
DEW046_AGGGAAGGT_AAAGCCTA	63	prechordal plate	ZF_Dorsal organizer	8
DEW046_GATCTCAACC_AAAGCCTA	65	endoderm	ZF_Endoderm	8
DEW046_ATTAGGACC_GTCCATGT	14	neural plate - anterior	ZF_Neuroectoderm	8
DEW046_GAAGTTTAGA_AGCTACGG	65	endoderm	ZF_Endoderm	8
DEW046_GATTGGCGTT_AAATCAGA	14	apoptotic-like	ZF_Apoptotic-like	8
DEW046_GAGAAGGCTT_TGGTTTCT	65	endoderm	ZF_Endoderm	8
DEW046_GACGGGCTTT_TCTAGCAG	22	tailbud - spinal cord	ZF_Tailbud	8
DEW046_GACTTACTCC_AAACTGGT	11	tailbud - spinal cord	ZF_Tailbud	8
DEW046_AGGTCACAG_CTCGCGTA	11	tailbud - PSM	ZF_Presomitic mesoderm	8
DEW046_GTTTGTTT_GGACTTCC	22	tailbud - spinal cord	ZF_Tailbud	8
DEW046_GAAAGATTGT_TCCCTGAT	2	neural plate - anterior	ZF_Neuroectoderm	8
DEW046_GGGTTGGT_GCTTTGGC	11	mesoderm - lateral plate	ZF_Intermediate mesoderm	8
DEW046_TGACTCGCGTA_AGGATTCA	14	epidermal	ZF_Non-neural ectoderm	8
DEW046_TGACTAGTAAC_GAGAATTG	11	mesoderm - lateral plate	ZF_Intermediate mesoderm	8
DEW046_AAGCTATGA_GCCAAGAT	11	mesoderm - lateral plate	ZF_Intermediate mesoderm	8
DEW046_AACTTAGC_TTTATCAC	2	neural plate - anterior	ZF_Neuroectoderm	8
DEW046_ATTCGTTCC_CCCTTCAG	2	neural plate - anterior	ZF_Neuroectoderm	8
DEW046_GAGGACTTCC_ACCCATAT	2	neural plate - anterior	ZF_Neuroectoderm	8
DEW046_AAAACCTCC_GTCCAAAG	22	tailbud - spinal cord	ZF_Tailbud	8
DEW046_GCTTTGGC_CCTCGTCT	22	tailbud - spinal cord	ZF_Tailbud	8
DEW046_AATGCGGAT_TTGATCTA	14	epidermal	ZF_Non-neural ectoderm	8
DEW046_CGGCACAT_CCGCAACT	14	tailbud - spinal cord	ZF_Tailbud	8
DEW046_GACTTCTTCG_CTCAGAAT	2	apoptotic-like	ZF_Apoptotic-like	8
DEW046_CCCATCTG_GGTCCCTT	14	epidermal	ZF_Non-neural ectoderm	8
DEW046_GATTGATCTA_ACTGAGTT	14	epidermal	ZF_Non-neural ectoderm	8
DEW046_GACAAGAGGG_TTAAGCGT	22	tailbud - spinal cord	ZF_Tailbud	8
DEW046_TGATGTGGCTA_GGTGGGAT	2	neural plate - anterior	ZF_Neuroectoderm	8
DEW046_TGATCCCGTAG_ACTGAGTT	2	neural plate - anterior	ZF_Neuroectoderm	8
DEW046_TGATCGACGGT_AGTGATGC	22	neural plate - posterior	ZF_Neuroectoderm	8
DEW046_TTATAGCC_TTCCGCTC	2	neural plate - anterior	ZF_Neuroectoderm	8
DEW046_AAAACCTCC_TTAGGACC	63	mesoderm - lateral plate	ZF_Intermediate mesoderm	8
DEW046_TGACCAGT_CTACTTGT	22	tailbud - spinal cord	ZF_Tailbud	8
DEW046_AGCAAAGCC_GTCTCTCT	22	tailbud - spinal cord	ZF_Tailbud	8
DEW046_AGCCTCTTT_CGAGATGT	14	epidermal	ZF_Non-neural ectoderm	8
DEW046_TGAAAATGTCG_CTTTCTTT	65	endoderm	ZF_Endoderm	8
DEW046_TGAGGCGGTTT_TGGCCTGT	63	prechordal plate	ZF_Dorsal organizer	8
DEW046_TGAATGACTTT_ATGACTTT	2	neural plate - anterior	ZF_Neuroectoderm	8
DEW046_GCAGCATG_AGCGCCTT	2	neural plate - anterior	ZF_Neuroectoderm	8
DEW046_TGATCCCGTAG_GTGGAGCT	22	neural plate - posterior	ZF_Neuroectoderm	8
DEW046_TGAGGAATAGA_GGGAACGA	14	tailbud - spinal cord	ZF_Tailbud	8
DEW046_TGACACAACAG_AGAAGTTA	2	neural plate - anterior	ZF_Neuroectoderm	8
DEW046_TGACTGTTCTT_TGACCAGT	2	neural plate - anterior	ZF_Neuroectoderm	8
DEW046_TGAGCCGGATT_TGAAATGA	22	tailbud - spinal cord	ZF_Tailbud	8
DEW046_TGATCGACACC_TTGCACGC	14	epidermal	ZF_Non-neural ectoderm	8
DEW046_AGTGGATGG_TCACCGAG	14	tailbud - spinal cord	ZF_Tailbud	8
DEW046_TGACTCAGAAT_ATACTCTT	14	epidermal	ZF_Non-neural ectoderm	8
DEW046_GACTTACTCC_TTGCATAT	2	neural plate - anterior	ZF_Neuroectoderm	8
DEW046_GGCATGCT_CCCAAGCA	22	neural plate - posterior	ZF_Neuroectoderm	8
DEW046_AGTTTACGT_AGCGAAGT	22	neural plate - posterior	ZF_Neuroectoderm	8
DEW046_AATGTTTG_GTTACGAT	14	epidermal	ZF_Non-neural ectoderm	8
DEW046_ATTGATTCT_GGGAAGGT	63	prechordal plate	ZF_Dorsal organizer	8
DEW046_GACGGGCTTT_ACTGAGTT	2	neural plate - anterior	ZF_Neuroectoderm	8
DEW046_TGCCTCAC_ATTCAGTA	14	tailbud - spinal cord	ZF_Tailbud	8
DEW046_GACGGGCTTT_CGTATCGG	14	epidermal	ZF_Non-neural ectoderm	8
DEW046_GATACCAGGC_TAGTGTTT	2	neural plate - anterior	ZF_Neuroectoderm	8
DEW046_ACTTAGGTA_AAGATTGT	11	tailbud - PSM	ZF_Presomitic mesoderm	8
DEW046_GATGTGCTCA_TTCCGCTC	2	neural plate - anterior	ZF_Neuroectoderm	8
DEW046_TGATCGACACC_ATGACCGA	14	epidermal	ZF_Non-neural ectoderm	8
DEW046_TGACTTCTGGA_TTGCATAT	22	neural plate - posterior	ZF_Neuroectoderm	8
DEW046_ATCTAGCAG_CTTTAATC	2	neural plate - anterior	ZF_Neuroectoderm	8
DEW046_TGACGGGTAGT_TACAGCCG	11	mesoderm - lateral plate	ZF_Intermediate mesoderm	8
DEW046_ACGTATAC_GTACACTC	11	tailbud - PSM	ZF_Presomitic mesoderm	8
DEW046_TTATAGCC_AACAATCC	11	mesoderm - lateral plate	ZF_Intermediate mesoderm	8
DEW046_ACAGATTAC_GTTACCGC	22	neural plate - posterior	ZF_Neuroectoderm	8
DEW046_GACTTCTTCG_CTTTCTTT	11	mesoderm - lateral plate	ZF_Intermediate mesoderm	8
DEW046_AAAATCGTT_CACGGACT	11	tailbud - PSM	ZF_Presomitic mesoderm	8
DEW046_GACCCGAATG_GGGTTGGT	11	apoptotic-like 2	ZF_Apoptotic-like 2	8
DEW046_AGGGAACGA_TCTAGCAG	11	tailbud - PSM	ZF_Presomitic mesoderm	8
DEW046_TGACGAGTCTG_AATGTTTG	11	tailbud - spinal cord	ZF_Tailbud	8
DEW046_AGCCAAGAT_ACTGCCGT	2	neural plate - anterior	ZF_Neuroectoderm	8
DEW046_TCCTTATT_GATGTGAG	65	endoderm	ZF_Endoderm	8
DEW046_GAGAGAGTAT_GGGAAATC	63	prechordal plate	ZF_Dorsal organizer	8
DEW046_GACGAGATGT_ACTGCCGT	14	epidermal	ZF_Non-neural ectoderm	8
DEW046_TGATCGACACC_TTCGGCCT	65	endoderm	ZF_Endoderm	8
DEW046_ACTGCGTTG_CTAGATTG	2	tailbud - spinal cord	ZF_Tailbud	8
DEW046_TAAATAGG_GGAATAGA	11	tailbud - PSM	ZF_Presomitic mesoderm	8
DEW046_GACGGGCTTT_TGACCCTC	11	mesoderm - lateral plate	ZF_Intermediate mesoderm	8
DEW046_ATGTGTCCT_AGAAGTCC	14	epidermal	ZF_Non-neural ectoderm	8
DEW046_GGATAAAG_ATTTCCGG	14	epidermal	ZF_Non-neural ectoderm	8
DEW046_TGAAAATGTCG_TAACCCGT	2	neural plate - posterior	ZF_Neuroectoderm	8
DEW046_ACTTAGGTA_ACTTCAAT	11	mesoderm - adaxial cells	ZF_Presomitic mesoderm	8
DEW046_GGTGGGAT_ACTAGGAT	2	neural plate - anterior	ZF_Neuroectoderm	8
DEW046_GATACCAGGC_AGTGATGC	11	mesoderm - lateral plate	ZF_Intermediate mesoderm	8
DEW046_TCCAGGGA_TTGGCGTT	2	neural plate - anterior	ZF_Neuroectoderm	8
DEW046_CGCTAATA_GCAAGGAC	2	neural plate - anterior	ZF_Neuroectoderm	8
DEW046_GAACTAGGAT_CCGTGTTT	2	neural plate - anterior	ZF_Neuroectoderm	8
DEW046_TGAGACAAAGG_TCGGTTCG	2	neural plate - anterior	ZF_Neuroectoderm	8
DEW046_ACCGCAACT_CCCGAATG	22	apoptotic-like	ZF_Apoptotic-like	8
DEW046_ACTCCGCAT_TTAAACTG	22	tailbud - spinal cord	ZF_Tailbud	8
DEW046_TGACACAACAG_ATTGGGCC	14	tailbud - spinal cord	ZF_Tailbud	8
DEW046_GACCCATAGC_TTAGGACC	2	neural plate - anterior	ZF_Neuroectoderm	8
DEW046_CCAACCGT_TTCGTTCC	2	neural plate - posterior	ZF_Neuroectoderm	8
DEW046_GACTGTCTGG_GATTGCGA	14	tailbud - spinal cord	ZF_Tailbud	8
DEW046_ACAACGTGG_ACTTCAAT	11	tailbud - PSM	ZF_Presomitic mesoderm	8
DEW046_GATGTACACG_TACAAACT	2	neural plate - anterior	ZF_Neuroectoderm	8
DEW046_ATTTATCAC_GAAGCACT	2	neural plate - anterior	ZF_Neuroectoderm	8
DEW046_GACCTACTAG_AAACGCCT	63	prechordal plate	ZF_Dorsal organizer	8
DEW046_CGAACGTA_TCGGTTCG	14	epidermal	ZF_Non-neural ectoderm	8
DEW046_GACATCTCCC_GTCAATAC	22	tailbud - spinal cord	ZF_Tailbud	8
DEW046_AAGTGAAAG_CTCGATGC	2	neural plate - anterior	ZF_Neuroectoderm	8
DEW046_TGAATGACCGA_CGAGTCTG	2	neural plate - anterior	ZF_Neuroectoderm	8
DEW046_TGACTCAGAAT_CCATTACT	14	tailbud - spinal cord	ZF_Tailbud	8
DEW046_TGCGTATC_CACAACAG	11	tailbud - PSM	ZF_Presomitic mesoderm	8
DEW046_TGATTGTTTAC_CCTGACAC	2	neural plate - anterior	ZF_Neuroectoderm	8
DEW046_ACACTCCTC_CGGCTTAC	63	prechordal plate	ZF_Dorsal organizer	8
DEW046_GTTACGAT_TAAATAGG	14	tailbud - spinal cord	ZF_Tailbud	8
DEW046_ATTTGGGAG_TTCCGCTC	14	epidermal	ZF_Non-neural ectoderm	8
DEW046_TCGAAGCT_AATGAATG	2	tailbud - spinal cord	ZF_Tailbud	8
DEW046_GCATGGGT_CTACCGTT	2	neural plate - anterior	ZF_Neuroectoderm	8
DEW046_TGACTCGCGTA_GAACGATT	22	tailbud - spinal cord	ZF_Tailbud	8
DEW046_TGATATTGCCT_ACCCACGA	14	neural plate - anterior	ZF_Neuroectoderm	8
DEW046_TGACACTTTCT_GAAGTGCC	2	neural plate - anterior	ZF_Neuroectoderm	8
DEW046_TGATTGTCGCC_CGGGTAGT	22	tailbud - spinal cord	ZF_Tailbud	8
DEW046_GACACGGACT_GAATACGC	11	tailbud - PSM	ZF_Presomitic mesoderm	8
DEW046_TCCTTATT_TGACCCTC	2	neural plate - anterior	ZF_Neuroectoderm	8
DEW046_GAGAATACGC_CTTCTGGA	14	epidermal	ZF_Non-neural ectoderm	8
DEW046_CGGCTTAC_ACACTAAG	14	epidermal	ZF_Non-neural ectoderm	8
DEW046_GATGCCATCG_CCAGCAGT	11	tailbud - PSM	ZF_Presomitic mesoderm	8
DEW046_GAGGCGTTAG_CCGCAACT	11	tailbud - PSM	ZF_Presomitic mesoderm	8
DEW046_GAAAGATTGT_ATTCAGTA	14	epidermal	ZF_Non-neural ectoderm	8
DEW046_ACCTTGCC_ACTGAGTT	11	apoptotic-like	ZF_Apoptotic-like	8
DEW046_AATTCAGTA_GTGTCGGA	14	epidermal	ZF_Non-neural ectoderm	8
DEW046_GATGAAATGA_ACTTCAAT	2	neural plate - anterior	ZF_Neuroectoderm	8
DEW046_GAGAAAGACC_GAAGCACT	14	epidermal	ZF_Non-neural ectoderm	8
DEW046_GAGAATACGC_TGTGTCCT	2	neural plate - anterior	ZF_Neuroectoderm	8
DEW046_GAAAGCGTAC_GCCAAGAT	14	epidermal	ZF_Non-neural ectoderm	8
DEW046_GATTGGCGTT_TTAGTCCG	65	endoderm	ZF_Endoderm	8
DEW046_TGATTGCACGC_ATCAAGTG	2	neural plate - anterior	ZF_Neuroectoderm	8
DEW046_GACCACATTA_ACTTCAAT	2	neural plate - anterior	ZF_Neuroectoderm	8
DEW046_TGATCGACGGT_GTACCTTG	65	endoderm	ZF_Endoderm	8
DEW046_AATGTTGGC_TACTTGTG	63	prechordal plate	ZF_Dorsal organizer	8
DEW046_ACGGACAAC_CTCAGAAT	14	tailbud - spinal cord	ZF_Tailbud	8
DEW046_CCCAAGCA_AAGATTGT	2	neural plate - anterior	ZF_Neuroectoderm	8
DEW046_TGATACGTGCT_CCTGACAC	2	neural plate - anterior	ZF_Neuroectoderm	8
DEW046_GATGTGAG_CTCCGCAT	65	endoderm	ZF_Endoderm	8
DEW046_AAAGGTAAT_CTTACTCC	22	neural plate - posterior	ZF_Neuroectoderm	8
DEW046_AGAAGTGCC_GTGGATGG	63	notocord	ZF_Notochord	8
DEW046_TGAGCCGGATT_ATACTCTT	11	tailbud - PSM	ZF_Presomitic mesoderm	8
DEW046_TGACGGGTAGT_ACTAGCCA	11	tailbud - PSM	ZF_Presomitic mesoderm	8
DEW046_GAGATCTCGG_AAACTGGT	2	neural plate - anterior	ZF_Neuroectoderm	8
DEW046_GATGTGCTCA_CTTTAATC	63	prechordal plate	ZF_Dorsal organizer	8
DEW046_ATTCGTTCC_ACGGTAGC	22	tailbud - spinal cord	ZF_Tailbud	8
DEW046_GAACGCCATT_CTACGAGC	2	neural plate - anterior	ZF_Neuroectoderm	8
DEW046_TGAATGAAGCA_TCACCGAG	11	tailbud - PSM	ZF_Presomitic mesoderm	8
DEW046_GACCCATAGC_ACTGAGTT	2	neural plate - anterior	ZF_Neuroectoderm	8
DEW046_GATCGGTACG_ACTTCAAT	11	mesoderm - lateral plate	ZF_Intermediate mesoderm	8
DEW046_TGAATGCATGG_CAGTCCCT	11	tailbud - PSM	ZF_Presomitic mesoderm	8
DEW046_ATTCGTTCC_GATTTACC	22	neural plate - posterior	ZF_Neuroectoderm	8
DEW046_TGATAGAAATG_CTCGATGC	19	nanog-high	ZF_Nanog-high	8
DEW046_TGAAAATGTCG_GGGTGTAT	11	endoderm	ZF_Endoderm	8
DEW046_GAAGGAAGAC_ATGACCGA	11	tailbud - PSM	ZF_Presomitic mesoderm	8
DEW046_TGAAAATGTCG_CTTACGGG	11	mesoderm - lateral plate	ZF_Intermediate mesoderm	8
DEW046_ATTTGGGAG_AATGTTTG	2	neural plate - anterior	ZF_Neuroectoderm	8
DEW046_GAAGGCAGTT_CGGCACAT	22	neural plate - posterior	ZF_Neuroectoderm	8
DEW046_AGTGGATGG_TTAGGACC	74	neural plate - anterior	ZF_Neuroectoderm	8
DEW046_AAAATCGTT_TTATAGCC	2	neural plate - anterior	ZF_Neuroectoderm	8
DEW046_GACCTATTCA_TTTGTGTC	63	prechordal plate	ZF_Dorsal organizer	8
DEW046_CTTTAATC_ACGCAGAG	11	tailbud - PSM	ZF_Presomitic mesoderm	8
DEW046_GAATTCCTTG_GCAGGGTA	11	tailbud - PSM	ZF_Presomitic mesoderm	8
DEW046_GATGGTTTCT_AAACTGGT	2	neural plate - anterior	ZF_Neuroectoderm	8
DEW046_AAGCTTCT_GGCCCTTA	11	tailbud - PSM	ZF_Presomitic mesoderm	8
DEW046_CTTACGGG_AGCGCGAT	63	prechordal plate	ZF_Dorsal organizer	8
DEW046_TTCCGCTC_CCCATCTG	14	epidermal	ZF_Non-neural ectoderm	8
DEW046_ATCATGAGG_AATTCCCA	2	neural plate - anterior	ZF_Neuroectoderm	8
DEW046_GACAATTAGT_ACTGCCGT	11	tailbud - PSM	ZF_Presomitic mesoderm	8
DEW046_TAGCCTCG_ATGGATTA	22	tailbud - spinal cord	ZF_Tailbud	8
DEW046_ATTTGGGAG_CACAACAG	22	tailbud - spinal cord	ZF_Tailbud	8
DEW046_GATGGGATTC_CCTGTTAT	2	neural plate - anterior	ZF_Neuroectoderm	8
DEW046_AGAGGTGG_ACCACGCT	14	tailbud - spinal cord	ZF_Tailbud	8
DEW046_GATGGGATTC_TTTACCCT	11	mesoderm - lateral plate	ZF_Intermediate mesoderm	8
DEW046_CCCATCTG_AATGACCC	22	neural plate - posterior	ZF_Neuroectoderm	8
DEW046_ATATGCAT_TTTAACAG	2	neural plate - anterior	ZF_Neuroectoderm	8
DEW046_GAGGGAGGTA_TGAGGTCT	56	nanog-high	ZF_Nanog-high	8
DEW046_GATAACCATC_ACGAAACG	2	neural plate - anterior	ZF_Neuroectoderm	8
DEW046_TGACACAGTTT_TGCTCCGT	74	neural plate - anterior	ZF_Neuroectoderm	8
DEW046_TGAAAATGTCG_AGAGGTGG	14	epidermal	ZF_Non-neural ectoderm	8
DEW046_ACCATTTGA_GCCTCTTT	11	tailbud - PSM	ZF_Presomitic mesoderm	8
DEW046_AGGTCACAG_AGCTACGG	14	apoptotic-like	ZF_Apoptotic-like	8
DEW046_TGATTGCACGC_GTTCAACT	14	epidermal	ZF_Non-neural ectoderm	8
DEW046_ATCTTTGT_GCATGGGT	14	tailbud - spinal cord	ZF_Tailbud	8
DEW046_GATGTGCTCA_GGCTACTA	2	neural plate - anterior	ZF_Neuroectoderm	8
DEW046_TGATCCCGTAG_AGGATTCA	22	neural plate - posterior	ZF_Neuroectoderm	8
DEW046_TGACCATTACT_CTACCGTT	14	epidermal	ZF_Non-neural ectoderm	8
DEW046_GATGCCATCG_CACGGACT	2	neural plate - anterior	ZF_Neuroectoderm	8
DEW046_GACGTACCTA_TGTAAAGG	14	apoptotic-like	ZF_Apoptotic-like	8
DEW046_AGATGTATT_ACGCAGAG	11	tailbud - PSM	ZF_Presomitic mesoderm	8
DEW046_TGAGCAGGGTA_CTAGTAAC	14	epidermal	ZF_Non-neural ectoderm	8
DEW046_TGATTGTTTAC_TCGAAGCT	2	neural plate - anterior	ZF_Neuroectoderm	8
DEW046_AGATGTATT_TCGTCATG	2	neural plate - anterior	ZF_Neuroectoderm	8
DEW046_TGACCTGTTAT_AAAGTCGG	2	neural plate - anterior	ZF_Neuroectoderm	8
DEW046_AGTGGATGG_GTGGATGG	2	neural plate - anterior	ZF_Neuroectoderm	8
DEW046_GATCGTTT_TTCGTTCC	14	neural plate - anterior	ZF_Neuroectoderm	8
DEW046_GGCCCTTA_TGGTATGA	11	mesoderm - lateral plate	ZF_Intermediate mesoderm	8
DEW046_ATTTCCGG_TCGACGGT	74	neural plate - posterior	ZF_Neuroectoderm	8
DEW046_TGAGACAAAGG_TACTTGTG	2	neural plate - anterior	ZF_Neuroectoderm	8
DEW046_GACCTACTAG_TGCAAGGG	2	neural plate - anterior	ZF_Neuroectoderm	8
DEW046_AGCCTCTTT_CAATTAGT	11	tailbud - PSM	ZF_Presomitic mesoderm	8
DEW046_ACCCTAACC_AACCCTTG	2	neural plate - anterior	ZF_Neuroectoderm	8
DEW046_ATGTGTCCT_TCGGTACG	22	tailbud - spinal cord	ZF_Tailbud	8
DEW046_TGAATGCATGG_GTCAATAC	14	tailbud - spinal cord	ZF_Tailbud	8
DEW046_GACTGTCTGG_CCACATTA	11	mesoderm - lateral plate	ZF_Intermediate mesoderm	8
DEW046_GACGCCTTGA_GTAATCCC	2	tailbud - spinal cord	ZF_Tailbud	8
DEW046_TGACACAGTTT_ATATACCT	11	tailbud - PSM	ZF_Presomitic mesoderm	8
DEW046_ATCTAGCAG_TCGGTTCG	22	tailbud - spinal cord	ZF_Tailbud	8
DEW046_GCATGGGT_ATTGGGCC	19	nanog-high	ZF_Nanog-high	8
DEW046_ACTGAGTGC_GGTTAGTG	2	neural plate - anterior	ZF_Neuroectoderm	8
DEW046_TGACTTCGCAC_AAACTGGT	22	tailbud - spinal cord	ZF_Tailbud	8
DEW046_GACGAGATGT_GTCATATT	14	tailbud - spinal cord	ZF_Tailbud	8
DEW046_AAGCTTCT_TCCCTGAT	2	neural plate - anterior	ZF_Neuroectoderm	8
DEW046_AAAACCTCC_CTGTCTGG	2	neural plate - anterior	ZF_Neuroectoderm	8
DEW046_GACGTACCTA_CGATTGAT	2	neural plate - anterior	ZF_Neuroectoderm	8
DEW046_AGGGTGTAT_TGTTTGAG	11	mesoderm - lateral plate	ZF_Intermediate mesoderm	8
DEW046_AAGCTACGG_AACAATCC	2	tailbud - spinal cord	ZF_Tailbud	8
DEW046_GATTGAGGGT_GATTAGAC	14	tailbud - spinal cord	ZF_Tailbud	8
DEW046_TGATTGCACGC_GGTGGGAT	63	prechordal plate	ZF_Dorsal organizer	8
DEW046_CGACGTCA_AGAAGTCC	11	mesoderm - lateral plate	ZF_Intermediate mesoderm	8
DEW046_TTGCATAT_CGAGTCTG	14	epidermal	ZF_Non-neural ectoderm	8
DEW046_GACGCCTTGA_TCCCTGAT	2	neural plate - anterior	ZF_Neuroectoderm	8
DEW046_GACAATTAGT_TCGACGGT	11	mesoderm - lateral plate	ZF_Intermediate mesoderm	8
DEW046_ATAGTGGAC_CTTACGGG	11	tailbud - PSM	ZF_Presomitic mesoderm	8
DEW046_ATCATGAGG_ACGTATAC	65	endoderm	ZF_Endoderm	8
DEW046_ACGTGGATA_TGACCCTC	65	endoderm	ZF_Endoderm	8
DEW046_AAAACGCCT_TGGTATGA	14	tailbud - spinal cord	ZF_Tailbud	8
DEW046_ACCGCAACT_ACAGCGGA	2	neural plate - anterior	ZF_Neuroectoderm	8
DEW046_ACTGAGTGC_CGTATTTC	2	neural plate - anterior	ZF_Neuroectoderm	8
DEW046_AGGGTGTAT_AATCGGGT	22	tailbud - spinal cord	ZF_Tailbud	8
DEW046_GTACCTTG_GACAACTT	2	neural plate - posterior	ZF_Neuroectoderm	8
DEW046_CTTCAGGT_CCTCGTCT	22	tailbud - spinal cord	ZF_Tailbud	8
DEW046_CGCTAATA_CAAGAGGG	22	tailbud - spinal cord	ZF_Tailbud	8
DEW046_TGAGTTCTGTT_TCCGTCCA	14	neural plate - anterior	ZF_Neuroectoderm	8
DEW046_GATGTACACG_CCCTTCAG	14	tailbud - spinal cord	ZF_Tailbud	8
DEW046_ATCAGCGC_AGTGATGC	2	neural plate - anterior	ZF_Neuroectoderm	8
DEW046_GATAACCATC_TACCGGCA	2	neural plate - anterior	ZF_Neuroectoderm	8
DEW046_GAGAAAGACC_ATATACCT	2	neural plate - anterior	ZF_Neuroectoderm	8
DEW046_ACCCTTGGT_ATTCAGTA	65	endoderm	ZF_Endoderm	8
DEW046_AAAGGTAAT_GATGTATT	11	tailbud - PSM	ZF_Presomitic mesoderm	8
DEW046_ATGGCCTGT_CCCGACTT	14	tailbud - spinal cord	ZF_Tailbud	8
DEW046_ACGTATAC_CTTCGATT	11	tailbud - PSM	ZF_Presomitic mesoderm	8
DEW046_GTCTCTCT_TCCCGTAG	2	neural plate - anterior	ZF_Neuroectoderm	8
DEW046_AGCACCTCT_GAAGTGCC	22	tailbud - spinal cord	ZF_Tailbud	8
DEW046_TGACGTAGAAG_GAGTTTCG	2	neural plate - anterior	ZF_Neuroectoderm	8
DEW046_GAGTCCAAAG_AAAGTCGG	11	mesoderm - lateral plate	ZF_Intermediate mesoderm	8
DEW046_TGATCACCGAG_TTCCGAGT	14	neural plate - anterior	ZF_Neuroectoderm	8
DEW046_ACCCTAACC_TGACCCTC	14	tailbud - spinal cord	ZF_Tailbud	8
DEW046_TTCGGCCT_CATCTCCC	11	mesoderm - lateral plate	ZF_Intermediate mesoderm	8
DEW046_GAAGTGATGC_TTCGGCCT	11	tailbud - PSM	ZF_Presomitic mesoderm	8
DEW046_CCAACCGT_CAGACCAT	63	notocord	ZF_Notochord	8
DEW046_TGACTGGTGCA_GGAGAAGC	63	notocord	ZF_Notochord	8
DEW046_AGGGTGTAT_CAACAAAT	65	endoderm	ZF_Endoderm	8
DEW046_GAGGACTTCC_AATTCCCA	63	notocord	ZF_Notochord	8
DEW046_GTAACGTT_CCTATTCA	22	tailbud - spinal cord	ZF_Tailbud	8
DEW046_AGATGTATT_TCTGTGGT	14	epidermal	ZF_Non-neural ectoderm	8
DEW046_TGATCACCGAG_CTACTTGT	11	tailbud - PSM	ZF_Presomitic mesoderm	8
DEW046_TGCCTCAC_CTACCGTT	11	mesoderm - lateral plate	ZF_Intermediate mesoderm	8
DEW046_TGATCGACGGT_GTTTACGT	22	tailbud - spinal cord	ZF_Tailbud	8
DEW046_ACTACTTGT_TGCTCCGT	14	tailbud - spinal cord	ZF_Tailbud	8
DEW046_TGACAATACTT_GAAGCACT	22	tailbud - spinal cord	ZF_Tailbud	8
DEW046_TGAGGTTTCTC_TTCCGAGT	63	prechordal plate	ZF_Dorsal organizer	8
DEW046_GGAAACAG_ATCAGCGC	11	tailbud - PSM	ZF_Presomitic mesoderm	8
DEW046_ATGCTCCGT_GCCACATC	65	endoderm	ZF_Endoderm	8
DEW046_GTAACGTT_GACAGATA	2	neural plate - anterior	ZF_Neuroectoderm	8
DEW046_TGAATGCATGG_AAGCGTAC	2	tailbud - spinal cord	ZF_Tailbud	8
DEW046_TGATTGTTTAC_CCTGTTAT	2	neural plate - anterior	ZF_Neuroectoderm	8
DEW046_AAAAGCCTA_TGGCCTGT	2	neural plate - anterior	ZF_Neuroectoderm	8
DEW046_TGAGACAACTT_TCGTCATG	2	neural plate - anterior	ZF_Neuroectoderm	8
DEW046_AGTTACCGC_GATGTGAG	22	tailbud - spinal cord	ZF_Tailbud	8
DEW046_TGACTTCGCAC_AACAATCC	2	neural plate - posterior	ZF_Neuroectoderm	8
DEW046_TGAAGAAGTTA_ATCAAGTG	2	neural plate - posterior	ZF_Neuroectoderm	8
DEW046_GACTTCTTCG_TCACCGAG	2	neural plate - anterior	ZF_Neuroectoderm	8
DEW046_TGATCACCGAG_ACGTATAC	11	tailbud - PSM	ZF_Presomitic mesoderm	8
DEW046_TGAATACCCAG_TCCAGGGA	2	neural plate - anterior	ZF_Neuroectoderm	8
DEW046_GAGAAAGACC_TCTCAACC	11	tailbud - PSM	ZF_Presomitic mesoderm	8
DEW046_GATTGGCGTT_GGCATGCT	14	epidermal	ZF_Non-neural ectoderm	8
DEW046_TGACTAGTAAC_TTTAACAG	22	neural plate - posterior	ZF_Neuroectoderm	8
DEW046_TGAGACAACTT_GGCGGTTT	2	neural plate - anterior	ZF_Neuroectoderm	8
DEW046_GATGTACACG_GGCGGTTT	11	apoptotic-like 2	ZF_Apoptotic-like 2	8
DEW046_AGGCCTAAG_AAATCAGA	63	prechordal plate	ZF_Dorsal organizer	8
DEW046_AGGTCACAG_GACGATGG	2	neural plate - anterior	ZF_Neuroectoderm	8
DEW046_TTAAGCGT_GGCATGCT	63	notocord	ZF_Notochord	8
DEW046_ACGTGCTAG_TTAAGCGT	11	mesoderm - lateral plate	ZF_Intermediate mesoderm	8
DEW046_TGAAACAATCC_ACTCACCG	11	tailbud - PSM	ZF_Presomitic mesoderm	8
DEW046_TGAACATCTAT_CCCGAATG	14	neural plate - anterior	ZF_Neuroectoderm	8
DEW046_GAACACTAAG_CTTCGCAC	14	epidermal	ZF_Non-neural ectoderm	8
DEW046_AAGACACCA_CGTATTTC	2	neural plate - anterior	ZF_Neuroectoderm	8
DEW046_TTATCTGT_GAATACGC	22	tailbud - spinal cord	ZF_Tailbud	8
DEW046_TGACACAAGGC_CATTTGTT	65	endoderm	ZF_Endoderm	8
DEW046_TGATGTGGCTA_CAAGAGGG	2	neural plate - anterior	ZF_Neuroectoderm	8
DEW046_AGTCAATAC_ACGCTCAG	2	tailbud - spinal cord	ZF_Tailbud	8
DEW046_GACAATTAGT_CGGGCTTT	2	tailbud - spinal cord	ZF_Tailbud	8
DEW046_TGCGACAG_GTCAAAGA	22	tailbud - spinal cord	ZF_Tailbud	8
DEW046_TGCGACAG_AGGCAACG	14	epidermal	ZF_Non-neural ectoderm	8
DEW046_GATTGAGGGT_TGGCCTGT	2	neural plate - anterior	ZF_Neuroectoderm	8
DEW046_TGACTTGGTGT_TTTGTGTC	2	neural plate - anterior	ZF_Neuroectoderm	8
DEW046_TGACACAGTTT_CCCAAGCA	14	epidermal	ZF_Non-neural ectoderm	8
DEW046_AGCACCTCT_ATTCCTTG	11	tailbud - PSM	ZF_Presomitic mesoderm	8
DEW046_AGCAGAAC_ATCTTTGT	22	tailbud - spinal cord	ZF_Tailbud	8
DEW046_TCATATGG_GTTCAACT	2	neural plate - anterior	ZF_Neuroectoderm	8
DEW046_TGATAACCCGT_CACTCCTC	2	neural plate - anterior	ZF_Neuroectoderm	8
DEW046_AGCCAAGAT_GTCCAAAG	11	tailbud - PSM	ZF_Presomitic mesoderm	8
DEW046_GAGCGGTA_TTGCATAT	22	tailbud - spinal cord	ZF_Tailbud	8
DEW046_GTACCTTG_CAATTAGT	11	tailbud - PSM	ZF_Presomitic mesoderm	8
DEW046_GATGTTCCAG_TCGGTACG	22	tailbud - PSM	ZF_Presomitic mesoderm	8
DEW046_ACCCGACTT_GGGAACGA	2	apoptotic-like	ZF_Apoptotic-like	8
DEW046_GAGCGTTGCT_ATGGAAAT	22	tailbud - spinal cord	ZF_Tailbud	8
DEW046_ATCCGCTA_CTTCTTCG	14	neural plate - anterior	ZF_Neuroectoderm	8
DEW046_GATGTGAG_AGGCAACG	14	epidermal	ZF_Non-neural ectoderm	8
DEW046_GTGTAACC_AGCTACGG	2	neural plate - anterior	ZF_Neuroectoderm	8
DEW046_AAGACACCA_TCGGTTCG	2	neural plate - anterior	ZF_Neuroectoderm	8
DEW046_TGAATGACTTT_TTGGCGTT	14	epidermal	ZF_Non-neural ectoderm	8
DEW046_AGATGTATT_GCATGGGT	11	tailbud - PSM	ZF_Presomitic mesoderm	8
DEW046_ACCCACGA_ATTTCCGG	22	neural plate - posterior	ZF_Neuroectoderm	8
DEW046_TGAGACAAAGG_GATGTATT	2	tailbud - spinal cord	ZF_Tailbud	8
DEW046_GTAACGTT_GGAGAAGC	11	mesoderm - adaxial cells	ZF_Presomitic mesoderm	8
DEW046_ACTTCAAT_GCAGCATG	11	mesoderm - lateral plate	ZF_Intermediate mesoderm	8
DEW046_GACAGTCCCT_GGCCTAAG	2	neural plate - anterior	ZF_Neuroectoderm	8
DEW046_ATTAGGACC_GTATGAGT	63	prechordal plate	ZF_Dorsal organizer	8
DEW046_ACGTGCTAG_CGTCAGCA	65	endoderm	ZF_Endoderm	8
DEW046_AGTATGAGT_AGAGACTA	2	neural plate - anterior	ZF_Neuroectoderm	8
DEW046_TGACACAACAG_AATGTTTG	2	neural plate - anterior	ZF_Neuroectoderm	8
DEW046_TGATGATAACA_GGGTTGGT	2	tailbud - spinal cord	ZF_Tailbud	8
DEW046_AAGTGAAAG_CTGGTGCA	14	tailbud - spinal cord	ZF_Tailbud	8
DEW046_GACGCTAGTC_AGGTTGTG	2	neural plate - anterior	ZF_Neuroectoderm	8
DEW046_CTTTCTTT_AGCTACGG	22	neural plate - posterior	ZF_Neuroectoderm	8
DEW046_TGAGGTTTCTC_ATCTTTGT	2	neural plate - anterior	ZF_Neuroectoderm	8
DEW046_GAAGGCAGTT_TAAATAGG	11	mesoderm - lateral plate	ZF_Intermediate mesoderm	8
DEW046_GATCGGTTTA_GGCATGCT	14	neural plate - anterior	ZF_Neuroectoderm	8
DEW046_TGACATACATT_CCAACCGT	2	neural plate - anterior	ZF_Neuroectoderm	8
DEW046_TTTGTGTC_GAATACGC	14	epidermal	ZF_Non-neural ectoderm	8
DEW046_TGACTCAGAAT_ATTCGACG	14	tailbud - spinal cord	ZF_Tailbud	8
DEW046_TGAAACACACG_GAAGCACT	2	neural plate - posterior	ZF_Neuroectoderm	8
DEW046_GGGTTGGT_GGAATAGA	65	endoderm	ZF_Endoderm	8
DEW046_AGTGGATGG_TGCAAGGG	11	mesoderm - lateral plate	ZF_Intermediate mesoderm	8
DEW046_GATGACCCTC_AGGAAGAC	14	tailbud - spinal cord	ZF_Tailbud	8
DEW046_CTTTCTTT_TTATAGCC	2	neural plate - anterior	ZF_Neuroectoderm	8
DEW046_GGAAACAG_AGTGAAAG	11	mesoderm - lateral plate	ZF_Intermediate mesoderm	8
DEW046_AACTTAGC_ACACTAAG	2	neural plate - anterior	ZF_Neuroectoderm	8
DEW046_TTAAGCGT_TCATATGG	2	apoptotic-like	ZF_Apoptotic-like	8
DEW046_AATGCGGAT_ATTCCTTG	22	tailbud - spinal cord	ZF_Tailbud	8
DEW046_TGAGGCGGTTT_TGACCCTC	14	epidermal	ZF_Non-neural ectoderm	8
DEW046_GAGAGAATTG_CCACATTA	2	neural plate - anterior	ZF_Neuroectoderm	8
DEW046_GATTGGCGTT_CTCTTGAC	2	neural plate - anterior	ZF_Neuroectoderm	8
DEW046_ACCATTTGA_CAGATTAC	2	neural plate - anterior	ZF_Neuroectoderm	8
DEW046_ACTACTTGT_TTATCTGT	14	tailbud - spinal cord	ZF_Tailbud	8
DEW046_TGATGTGGCTA_GAGCGGTA	2	neural plate - posterior	ZF_Neuroectoderm	8
DEW046_GAGGGAGGTA_CGACGTCA	2	neural plate - anterior	ZF_Neuroectoderm	8
DEW046_TGAGCGCATTC_TTCGGCCT	22	tailbud - spinal cord	ZF_Tailbud	8
DEW046_AGGTCACAG_TTGGACTT	63	notocord	ZF_Notochord	8
DEW046_TGACACAACAG_CTTTAATC	14	apoptotic-like	ZF_Apoptotic-like	8
DEW046_ACCCACGA_TCTCACTT	14	epidermal	ZF_Non-neural ectoderm	8
DEW046_ATGCTCCGT_GGCCTAAG	63	notocord	ZF_Notochord	8
DEW046_ATCTAGCAG_CATCGCAG	63	mesoderm - lateral plate	ZF_Intermediate mesoderm	8
DEW046_TGATTAGTCCG_GCAGGGTA	22	neural plate - posterior	ZF_Neuroectoderm	8
DEW046_GTAACGTT_ACCTTCTT	22	tailbud - spinal cord	ZF_Tailbud	8
DEW046_TGACACAGTTT_CCGCAACT	14	epidermal	ZF_Non-neural ectoderm	8
DEW046_CTTTAATC_TAACTACT	11	tailbud - PSM	ZF_Presomitic mesoderm	8
DEW046_TGAGACAACTT_AATTCCCA	22	neural plate - posterior	ZF_Neuroectoderm	8
DEW046_TGAGAGGCTGA_AGAGGTGG	74	neural plate - anterior	ZF_Neuroectoderm	8
DEW046_GACTGTCTGG_TCATCCTT	2	neural plate - anterior	ZF_Neuroectoderm	8
DEW046_TGAGGCGGTTT_CAACAAAT	2	neural plate - anterior	ZF_Neuroectoderm	8
DEW046_TGACAACAAAT_GGCGGTTT	2	neural plate - anterior	ZF_Neuroectoderm	8
DEW046_GATGAGGTCT_AAGATTGT	22	tailbud - spinal cord	ZF_Tailbud	8
DEW046_TGACCTGTTAT_AGCGAAGT	2	neural plate - anterior	ZF_Neuroectoderm	8
DEW046_CGCTAATA_AAGATTGT	11	mesoderm - lateral plate	ZF_Intermediate mesoderm	8
DEW046_ATTTGGGAG_ACTTCAAT	11	mesoderm - adaxial cells	ZF_Presomitic mesoderm	8
DEW046_AAGCTATGA_GGGCCAAT	2	neural plate - posterior	ZF_Neuroectoderm	8
DEW046_TGACACTTTCT_GCATGGGT	2	neural plate - anterior	ZF_Neuroectoderm	8
DEW046_TGACAACAAAT_GGAGAAGC	22	tailbud - spinal cord	ZF_Tailbud	8
DEW046_CGACGTCA_TGGTTTCT	2	tailbud - spinal cord	ZF_Tailbud	8
DEW046_GACCTGACAC_CTATAGAG	22	tailbud - spinal cord	ZF_Tailbud	8
DEW046_TGAAACACACG_GGTGGGAT	2	neural plate - anterior	ZF_Neuroectoderm	8
DEW046_GATGACCCTC_ACTCACCG	11	mesoderm - lateral plate	ZF_Intermediate mesoderm	8
DEW046_TGCGACAG_TTGATTCT	22	neural plate - posterior	ZF_Neuroectoderm	8
DEW046_TGAGTACACTC_TGGAGGAG	63	prechordal plate	ZF_Dorsal organizer	8
DEW046_GATCTCAACC_ACCACGCT	14	tailbud - spinal cord	ZF_Tailbud	8
DEW046_GACAATTAGT_CAGTTTGC	22	tailbud - spinal cord	ZF_Tailbud	8
DEW046_GAACACTAAG_GGGAAATC	2	neural plate - anterior	ZF_Neuroectoderm	8
DEW046_TGAGCCACATC_GTTTACGT	11	tailbud - PSM	ZF_Presomitic mesoderm	8
DEW046_ATCACGTTT_GGGAAATC	11	mesoderm - lateral plate	ZF_Intermediate mesoderm	8
DEW046_CAGTTTGC_GGTGACAC	11	mesoderm - lateral plate	ZF_Intermediate mesoderm	8
DEW046_TGACCAGCAGT_TTAAGCGT	11	mesoderm - adaxial cells	ZF_Presomitic mesoderm	8
DEW046_GACTTACTCC_ATTCAGTA	2	neural plate - anterior	ZF_Neuroectoderm	8
DEW046_TGAAACACACG_GCAGCATG	22	neural plate - posterior	ZF_Neuroectoderm	8
DEW046_AGCCTCTTT_GGCCTAAG	2	neural plate - posterior	ZF_Neuroectoderm	8
DEW046_GATAGTGTTT_CTGTTCTT	22	neural plate - posterior	ZF_Neuroectoderm	8
DEW046_AGGTCACAG_CGACTCCT	2	neural plate - anterior	ZF_Neuroectoderm	8
DEW046_AGTTACCGC_GGTTAGTG	2	neural plate - posterior	ZF_Neuroectoderm	8
DEW046_ACCTTCTT_TGTCTTTC	11	tailbud - PSM	ZF_Presomitic mesoderm	8
DEW046_TGAAGGTTGTG_CTATAGAG	14	epidermal	ZF_Non-neural ectoderm	8
DEW046_ACCCGACTT_AGGAAGAC	11	mesoderm - lateral plate	ZF_Intermediate mesoderm	8
DEW046_ATTGTGACT_GACAACTT	22	neural plate - posterior	ZF_Neuroectoderm	8
DEW046_TGATACGTGCT_AGCGAAGT	2	tailbud - spinal cord	ZF_Tailbud	8
DEW046_TGAGTAATCCC_TCATATGG	2	neural plate - anterior	ZF_Neuroectoderm	8
DEW046_GATCTCACTT_GACAAAGG	2	neural plate - anterior	ZF_Neuroectoderm	8
DEW046_GACAAGAGGG_AGGATTCA	2	neural plate - anterior	ZF_Neuroectoderm	8
DEW046_ATTGATTCT_GATTTACC	22	neural plate - posterior	ZF_Neuroectoderm	8
DEW046_GCTTTGGC_AATTCCCA	2	apoptotic-like	ZF_Apoptotic-like	8
DEW046_ACTAGATTG_ATATAGGA	54	neural plate - posterior	ZF_Neuroectoderm	8
DEW046_AGGTTAGTG_AAAGCCTA	14	epidermal	ZF_Non-neural ectoderm	8
DEW046_TGAGGCGGTTT_CTTCTTCG	2	neural plate - anterior	ZF_Neuroectoderm	8
DEW046_GCTTTGGC_CTTCAGGT	11	mesoderm - lateral plate	ZF_Intermediate mesoderm	8
DEW046_TGAGCCACATC_GAGTTTCG	2	apoptotic-like	ZF_Apoptotic-like	8
DEW046_CGGCACAT_TGATAACA	22	mesoderm - adaxial cells	ZF_Presomitic mesoderm	8
DEW046_TGATTTACCCT_GTCCATGT	14	epidermal	ZF_Non-neural ectoderm	8
DEW046_TGACCTGTTAT_ACTTCAAT	11	tailbud - PSM	ZF_Presomitic mesoderm	8
DEW046_GATGTGCTCA_TTTGGGAG	22	tailbud - spinal cord	ZF_Tailbud	8
DEW046_GATGACGGAC_TACTTGTG	14	epidermal	ZF_Non-neural ectoderm	8
DEW046_GAACTAGGAT_GTTAACCA	11	mesoderm - lateral plate	ZF_Intermediate mesoderm	8
DEW046_TGACCATTACT_CTAGACCC	22	tailbud - spinal cord	ZF_Tailbud	8
DEW046_GAAGGCAGTT_CCCGAATG	11	mesoderm - lateral plate	ZF_Intermediate mesoderm	8
DEW046_AGGGTGTAT_CCCTTCAG	11	tailbud - PSM	ZF_Presomitic mesoderm	8
DEW046_GTTACGAT_ATCTTTGT	14	neural plate - anterior	ZF_Neuroectoderm	8
DEW046_AGCAAAGCC_TTCGCTGG	14	tailbud - spinal cord	ZF_Tailbud	8
DEW046_GAGAGAATTG_ATCCGCTA	11	tailbud - PSM	ZF_Presomitic mesoderm	8
DEW046_GACGCCTTGA_TTGGACTT	22	tailbud - spinal cord	ZF_Tailbud	8
DEW046_GAGCGGTA_CTTACGGG	2	neural plate - anterior	ZF_Neuroectoderm	8
DEW046_TGCGTATC_GCCACATC	2	neural plate - anterior	ZF_Neuroectoderm	8
DEW046_TGAGCAGGGTA_ACGCTCAG	22	tailbud - spinal cord	ZF_Tailbud	8
DEW046_GATGAGGTCT_GTTCAACT	11	tailbud - PSM	ZF_Presomitic mesoderm	8
DEW046_TGACACAACAG_CAACGTGG	14	epidermal	ZF_Non-neural ectoderm	8
DEW046_ATGGCCTGT_ATTGGGCC	2	neural plate - anterior	ZF_Neuroectoderm	8
DEW046_TGACTAGTAAC_TTTATCAC	65	endoderm	ZF_Endoderm	8
DEW046_TGAATGACCGA_TTTACCCT	65	endoderm	ZF_Endoderm	8
DEW046_GACCCATAGC_GCAAAGCC	11	tailbud - PSM	ZF_Presomitic mesoderm	8
DEW046_TGAGGTTTCTC_GTAACGTT	2	neural plate - posterior	ZF_Neuroectoderm	8
DEW046_ATCAGCGC_TGCTCCGT	2	tailbud - spinal cord	ZF_Tailbud	8
DEW046_TGCGTATC_CCCTAACC	11	mesoderm - adaxial cells	ZF_Presomitic mesoderm	8
DEW046_TGAAGAAGTTA_GGCCCTTA	22	apoptotic-like	ZF_Apoptotic-like	8
DEW046_GAATGGAAAT_ACTAGCCA	14	epidermal	ZF_Non-neural ectoderm	8
DEW046_AGGCCTAAG_GCCTCTTT	65	endoderm	ZF_Endoderm	8
DEW046_GATTGGCGTT_TCATGAGG	2	neural plate - anterior	ZF_Neuroectoderm	8
DEW046_TGAAAACTGGT_CCAACCGT	65	endoderm	ZF_Endoderm	8
DEW046_GATTTAACAG_ACGCTCAG	14	epidermal	ZF_Non-neural ectoderm	8
DEW046_GACCTATTCA_TCTAGCAG	14	epidermal	ZF_Non-neural ectoderm	8
DEW046_TGAGTAATCCC_AACACACG	14	tailbud - spinal cord	ZF_Tailbud	8
DEW046_TGACCATTACT_TTCGCTGG	14	epidermal	ZF_Non-neural ectoderm	8
DEW046_TTCGGCCT_TAGCTTAT	22	neural plate - posterior	ZF_Neuroectoderm	8
DEW046_ACCGTGTTT_ACCCATAT	11	tailbud - PSM	ZF_Presomitic mesoderm	8
DEW046_TGACGGGTAGT_CAGTTTGC	22	tailbud - spinal cord	ZF_Tailbud	8
DEW046_TGACTGGTGCA_CACTTTCT	14	epidermal	ZF_Non-neural ectoderm	8
DEW046_TGAAACACACG_ATCAAGTG	2	neural plate - anterior	ZF_Neuroectoderm	8
DEW046_ATGGCCTGT_CAAGTCAT	22	tailbud - spinal cord	ZF_Tailbud	8
DEW046_GACCTGACAC_CAGATTAC	11	tailbud - PSM	ZF_Presomitic mesoderm	8
DEW046_AGCCTCTTT_AGGCAACG	11	tailbud - PSM	ZF_Presomitic mesoderm	8
DEW046_TGATGCCC_TTGGCGTT	63	prechordal plate	ZF_Dorsal organizer	8
DEW046_AGCACCTCT_CATTTGTT	2	tailbud - spinal cord	ZF_Tailbud	8
DEW046_ATGCTCCGT_TTAAGCGT	14	neural plate - anterior	ZF_Neuroectoderm	8
DEW046_ACGCTCTCA_ACCTTCTT	11	tailbud - PSM	ZF_Presomitic mesoderm	8
DEW046_ATGTGTCCT_TGCCATCG	2	neural plate - anterior	ZF_Neuroectoderm	8
DEW046_GATGGTTTCT_TGCAAGGG	14	epidermal	ZF_Non-neural ectoderm	8
DEW046_GACGAGATGT_GGCCCTTA	22	tailbud - spinal cord	ZF_Tailbud	8
DEW046_TGATTGCACGC_TTGGCGTT	65	endoderm	ZF_Endoderm	8
DEW046_ACTGCGTTG_CTCAGAAT	65	endoderm	ZF_Endoderm	8
DEW046_GACTGTCTGG_TAGCCTCG	2	neural plate - anterior	ZF_Neuroectoderm	8
DEW046_GAAAGCGTAC_TTGGACTT	11	tailbud - spinal cord	ZF_Tailbud	8
DEW046_CTTTAATC_TCCCGTAG	2	neural plate - anterior	ZF_Neuroectoderm	8
DEW046_TACCGGCA_GAAGCACT	14	epidermal	ZF_Non-neural ectoderm	8
DEW046_ACGCTCTCA_CTGGTGCA	2	tailbud - spinal cord	ZF_Tailbud	8
DEW046_TGCCTCAC_CCCGACTT	22	tailbud - PSM	ZF_Presomitic mesoderm	8
DEW046_GCAGTCGA_GACAACTT	11	tailbud - PSM	ZF_Presomitic mesoderm	8
DEW046_ATCTAGCAG_GTATGAGT	14	epidermal	ZF_Non-neural ectoderm	8
DEW046_TGATCGACACC_CTTAGGTA	14	tailbud - spinal cord	ZF_Tailbud	8
DEW046_GATTTAACAG_GTTGTCAT	22	neural plate - posterior	ZF_Neuroectoderm	8
DEW046_TGAGGTCTGAC_AAATGTCG	14	epidermal	ZF_Non-neural ectoderm	8
DEW046_GCATGGGT_CCATTACT	2	neural plate - anterior	ZF_Neuroectoderm	8
DEW046_ATCCGCTA_GTTCTGTT	74	neural plate - anterior	ZF_Neuroectoderm	8
DEW046_ATTAGGACC_ACGTATAC	14	epidermal	ZF_Non-neural ectoderm	8
DEW046_GAGAATTCGT_AGCGCCTT	63	prechordal plate	ZF_Dorsal organizer	8
DEW046_GACCTGACAC_GAAGGCTT	22	tailbud - spinal cord	ZF_Tailbud	8
DEW046_AGAACGATT_CCCGACTT	11	tailbud - PSM	ZF_Presomitic mesoderm	8
DEW046_AACCCATAT_ATGACCGA	22	neural plate - posterior	ZF_Neuroectoderm	8
DEW046_TGAATGCATGG_TTGGCGTT	22	tailbud - spinal cord	ZF_Tailbud	8
DEW046_GCATGGGT_TGCTCCGT	14	epidermal	ZF_Non-neural ectoderm	8
DEW046_AGCAGAAC_TGCGTATC	11	tailbud - PSM	ZF_Presomitic mesoderm	8
DEW046_TGAGACAACTT_AAGATTGT	11	tailbud - PSM	ZF_Presomitic mesoderm	8
DEW046_GACCTATTCA_CCAGCAGT	11	tailbud - PSM	ZF_Presomitic mesoderm	8
DEW046_AAAACGCCT_GATTTACC	14	epidermal	ZF_Non-neural ectoderm	8
DEW046_GATCTCACTT_CGAACGTA	2	neural plate - anterior	ZF_Neuroectoderm	8
DEW046_GAGCGGTA_AGCGAAGT	11	tailbud - PSM	ZF_Presomitic mesoderm	8
DEW046_GACTTCTTCG_CCGTGTTT	63	prechordal plate	ZF_Dorsal organizer	8
DEW046_TGACGGGTAGT_TCGAAGCT	22	neural plate - posterior	ZF_Neuroectoderm	8
DEW046_GATCCGTCCA_ATGACTTT	22	tailbud - spinal cord	ZF_Tailbud	8
DEW046_GAGAAAGACC_AGGATTCA	22	tailbud - spinal cord	ZF_Tailbud	8
DEW046_GGAGAAGC_CAATACTT	22	neural plate - posterior	ZF_Neuroectoderm	8
DEW046_ACCATTTGA_AATGAATG	11	tailbud - PSM	ZF_Presomitic mesoderm	8
DEW046_TGACGAGTCTG_GGAGAAGC	63	notocord	ZF_Notochord	8
DEW046_AGCTTTCCA_TGCTCCGT	2	neural plate - posterior	ZF_Neuroectoderm	8
DEW046_GATGAGGTCT_TGGCTACC	63	prechordal plate	ZF_Dorsal organizer	8
DEW046_ATGTGTCCT_ATCTTTGT	14	apoptotic-like	ZF_Apoptotic-like	8
DEW046_TCCTTATT_GTCGTCGT	63	prechordal plate	ZF_Dorsal organizer	8
DEW046_ATAGTGGAC_ACCTTGCC	11	tailbud - PSM	ZF_Presomitic mesoderm	8
DEW046_GATCTCACTT_GAAGCACT	2	neural plate - anterior	ZF_Neuroectoderm	8
DEW046_AGGTGACAC_CCAACCGT	14	epidermal	ZF_Non-neural ectoderm	8
DEW046_ATCTGCATC_GTAACGTT	22	apoptotic-like	ZF_Apoptotic-like	8
DEW046_GATCCCAATC_GCAGTCGA	63	notocord	ZF_Notochord	8
DEW046_GATACCAGGC_GGGAAATC	22	tailbud - spinal cord	ZF_Tailbud	8
DEW046_GATGAGGTCT_TCTCAACC	2	neural plate - posterior	ZF_Neuroectoderm	8
DEW046_AGTGGATGG_GAAGTGCC	22	tailbud - spinal cord	ZF_Tailbud	8
DEW046_ATGGCCTGT_ATTCAGTA	14	tailbud - spinal cord	ZF_Tailbud	8
DEW046_TGACAGACCAT_GTTACCGC	14	neural plate - anterior	ZF_Neuroectoderm	8
DEW046_TGATTCACATA_GAAGCACT	2	tailbud - spinal cord	ZF_Tailbud	8
DEW046_GATACCAGGC_AAATCGTT	14	epidermal	ZF_Non-neural ectoderm	8
DEW046_AAATGACCC_TTATAGCC	2	neural plate - anterior	ZF_Neuroectoderm	8
DEW046_TGAGGCGGTTT_TTGCACGC	11	tailbud - PSM	ZF_Presomitic mesoderm	8
DEW046_TGAAACCCTTG_GCCTCTTT	2	neural plate - anterior	ZF_Neuroectoderm	8
DEW046_TTAAGCGT_ATTGGGCC	14	epidermal	ZF_Non-neural ectoderm	8
DEW046_TGAGGCTACTA_AAACAGGG	11	tailbud - PSM	ZF_Presomitic mesoderm	8
DEW046_AGCAACCTG_TTGATTCT	2	neural plate - anterior	ZF_Neuroectoderm	8
DEW046_GCAGCATG_CTGTTCTT	14	epidermal	ZF_Non-neural ectoderm	8
DEW046_TCCTTATT_TCGGTTTA	63	prechordal plate	ZF_Dorsal organizer	8
DEW046_GAGGCGTTAG_GCCACATC	2	neural plate - posterior	ZF_Neuroectoderm	8
DEW046_GACCACATTA_GATCTCGG	14	neural plate - anterior	ZF_Neuroectoderm	8
DEW047_AATGCGGAT_AAAGTCGG	11	tailbud - PSM	ZF_Presomitic mesoderm	8
DEW047_AATTCAGTA_CTTGGTGT	22	neural plate - posterior	ZF_Neuroectoderm	8
DEW047_TGAGGGAAATC_TCGACGGT	14	neural plate - anterior	ZF_Neuroectoderm	8
DEW047_GATTGAGGGT_CCCGAATG	2	neural plate - posterior	ZF_Neuroectoderm	8
DEW047_GATAAGACGG_ATGAAGCA	2	neural plate - anterior	ZF_Neuroectoderm	8
DEW047_ACCATTTGA_TCTAGCAG	2	neural plate - anterior	ZF_Neuroectoderm	8
DEW047_ATTGGATCG_GTCCAAAG	22	neural plate - posterior	ZF_Neuroectoderm	8
DEW047_GATGAAATGA_TGGGATTC	65	endoderm	ZF_Endoderm	8
DEW047_GAAAGATTGT_AACTTAGC	2	neural plate - anterior	ZF_Neuroectoderm	8
DEW047_TGCCTCAC_GGCGGTTT	22	tailbud - spinal cord	ZF_Tailbud	8
DEW047_ATTGGATCG_GCAGGGTA	22	tailbud - spinal cord	ZF_Tailbud	8
DEW047_TGATCGTCATG_CGGACAAC	65	endoderm	ZF_Endoderm	8
DEW047_ATAGTGGAC_CGGGCTTT	22	tailbud - spinal cord	ZF_Tailbud	8
DEW047_GAGAATTCGT_TCGGTACG	22	apoptotic-like	ZF_Apoptotic-like	8
DEW047_ATTGGATCG_AAGCTTCT	2	neural plate - anterior	ZF_Neuroectoderm	8
DEW047_AATACTCTT_TGTACACG	11	mesoderm - lateral plate	ZF_Intermediate mesoderm	8
DEW047_AAAGTAATC_AGCGTAGG	22	tailbud - spinal cord	ZF_Tailbud	8
DEW047_TGACTTCGCAC_CCATTACT	11	mesoderm - adaxial cells	ZF_Presomitic mesoderm	8
DEW047_TGAGTACACTC_GGCGTTAG	2	neural plate - anterior	ZF_Neuroectoderm	8
DEW047_GAACACTAAG_ATGGATTA	14	tailbud - spinal cord	ZF_Tailbud	8
DEW047_AGTCAAAGA_TGTAAAGG	2	neural plate - anterior	ZF_Neuroectoderm	8
DEW047_AGGCCTAAG_CGTACCTA	2	neural plate - anterior	ZF_Neuroectoderm	8
DEW047_TGAGTAATCCC_ATGACCGA	14	tailbud - spinal cord	ZF_Tailbud	8
DEW047_AGTTTACGT_TTCGGCCT	14	apoptotic-like	ZF_Apoptotic-like	8
DEW047_AACGCAGAG_GGGAACGA	2	neural plate - anterior	ZF_Neuroectoderm	8
DEW047_ACTCCGCAT_TCGACACC	14	epidermal	ZF_Non-neural ectoderm	8
DEW047_GAGTTTCG_GACAAAGG	14	tailbud - spinal cord	ZF_Tailbud	8
DEW047_AATTCCCA_CTAGACCC	63	mesoderm - lateral plate	ZF_Intermediate mesoderm	8
DEW047_ACTTAGGTA_CGTATCGG	2	neural plate - anterior	ZF_Neuroectoderm	8
DEW047_GACCTATTCA_TCCAGGGA	2	neural plate - anterior	ZF_Neuroectoderm	8
DEW047_AACGGTAGC_TCCCTGAT	2	neural plate - anterior	ZF_Neuroectoderm	8
DEW047_CTTACGGG_GTGTCGGA	14	epidermal	ZF_Non-neural ectoderm	8
DEW047_TGAAAATGTCG_TCCCGTAG	22	tailbud - spinal cord	ZF_Tailbud	8
DEW047_GACCTGACAC_CTCTTGAC	11	mesoderm - lateral plate	ZF_Intermediate mesoderm	8
DEW047_TGCGTATC_TGACCAGT	14	tailbud - spinal cord	ZF_Tailbud	8
DEW047_ACCTTGCC_TGTAAAGG	74	neural plate - anterior	ZF_Neuroectoderm	8
DEW047_TGATTAGTCCG_GCAAGGAC	11	tailbud - PSM	ZF_Presomitic mesoderm	8
DEW047_ATCTGCATC_CCCTTCAG	22	neural plate - posterior	ZF_Neuroectoderm	8
DEW047_TGACTTCTGGA_TGTACACG	14	epidermal	ZF_Non-neural ectoderm	8
DEW047_AGAAGTCC_TGATGCCC	65	endoderm	ZF_Endoderm	8
DEW047_TGAAACCCTTG_GTTACGAT	65	neural plate - anterior	ZF_Neuroectoderm	8
DEW047_ACTCCGCAT_CGCCTTGA	2	neural plate - anterior	ZF_Neuroectoderm	8
DEW047_AACCTGAC_AGTGAAAG	2	neural plate - anterior	ZF_Neuroectoderm	8
DEW047_AACGCAGAG_ACTAGGAT	2	apoptotic-like	ZF_Apoptotic-like	8
DEW047_ATTTGGGAG_CGGGTAGT	63	notocord	ZF_Notochord	8
DEW047_ACCTTCTT_CGGCTTAC	2	neural plate - anterior	ZF_Neuroectoderm	8
DEW047_TGAGGAATAGA_AAATCGTT	63	prechordal plate	ZF_Dorsal organizer	8
DEW047_TGACATACATT_AAATCGTT	14	epidermal	ZF_Non-neural ectoderm	8
DEW047_TGATCACCGAG_GTTACGAT	11	tailbud - PSM	ZF_Presomitic mesoderm	8
DEW047_GAGCGTTGCT_ACCACGCT	22	neural plate - posterior	ZF_Neuroectoderm	8
DEW047_AGAAGTGCC_GCATGGGT	14	epidermal	ZF_Non-neural ectoderm	8
DEW047_ACGCTCTCA_TCTGTGGT	14	neural plate - anterior	ZF_Neuroectoderm	8
DEW047_TGAATTCGACG_TGAGGTCT	11	tailbud - PSM	ZF_Presomitic mesoderm	8
DEW047_GATGTGCTCA_CAAGAGGG	22	tailbud - spinal cord	ZF_Tailbud	8
DEW047_AAAATCGTT_CGCTAGTC	2	neural plate - anterior	ZF_Neuroectoderm	8
DEW047_AGCAACCTG_TGCAAGGG	11	mesoderm - lateral plate	ZF_Intermediate mesoderm	8
DEW047_AATCCCACG_CGGGTAGT	2	neural plate - anterior	ZF_Neuroectoderm	8
DEW047_GAGATTGCGA_TTGGCGTT	2	neural plate - anterior	ZF_Neuroectoderm	8
DEW047_TGATCGACGGT_TCGACGGT	22	tailbud - spinal cord	ZF_Tailbud	8
DEW047_GAAGGCAGTT_GTTTACGT	14	epidermal	ZF_Non-neural ectoderm	8
DEW047_ATCTTTGT_AAAGCCTA	2	neural plate - anterior	ZF_Neuroectoderm	8
DEW047_CGAACGTA_ACGCCATT	2	neural plate - anterior	ZF_Neuroectoderm	8
DEW047_TGATCGACGGT_CGCCTTGA	2	neural plate - anterior	ZF_Neuroectoderm	8
DEW047_TGCCTCAC_TTGAGGGT	11	tailbud - PSM	ZF_Presomitic mesoderm	8
DEW047_GATCGTTT_TTATAGCC	2	neural plate - anterior	ZF_Neuroectoderm	8
DEW047_TTCCGCTC_TCATCCTT	22	neural plate - posterior	ZF_Neuroectoderm	8
DEW047_AACGCAGAG_ACTGCCGT	65	endoderm	ZF_Endoderm	8
DEW047_TGAACGCTCAG_AAACTCGA	11	mesoderm - lateral plate	ZF_Intermediate mesoderm	8
DEW047_AACGAAACG_CCCGACTT	11	tailbud - PSM	ZF_Presomitic mesoderm	8
DEW047_GAGGCGTTAG_TAACCATC	2	neural plate - anterior	ZF_Neuroectoderm	8
DEW047_AACTGAGTT_GAATACGC	2	neural plate - anterior	ZF_Neuroectoderm	8
DEW047_GACAATTAGT_AATGAATG	2	neural plate - anterior	ZF_Neuroectoderm	8
DEW047_TGATGATAACA_CTTCAGGT	22	tailbud - spinal cord	ZF_Tailbud	8
DEW047_ATCTGCATC_CATACATT	65	endoderm	ZF_Endoderm	8
DEW047_TCCAGGGA_CTACCGTT	14	epidermal	ZF_Non-neural ectoderm	8
DEW047_AGTCAATAC_ACATCTAT	11	tailbud - PSM	ZF_Presomitic mesoderm	8
DEW047_AGTGTCGGA_CTTACGGG	22	neural plate - posterior	ZF_Neuroectoderm	8
DEW047_CATCGCAG_AAATCGTT	11	mesoderm - lateral plate	ZF_Intermediate mesoderm	8
DEW047_TGCGTATC_AGGAGCTT	22	apoptotic-like	ZF_Apoptotic-like	8
DEW047_AGTGGATGG_ACTCACCG	2	neural plate - anterior	ZF_Neuroectoderm	8
DEW047_AAATCAGA_ACACTAAG	14	epidermal	ZF_Non-neural ectoderm	8
DEW047_AAGCGCCTT_AGTTTAGA	65	endoderm	ZF_Endoderm	8
DEW047_AACGGTAGC_CAAGAGGG	2	neural plate - anterior	ZF_Neuroectoderm	8
DEW047_GATGGTTTCT_TCATATGG	22	tailbud - spinal cord	ZF_Tailbud	8
DEW047_ATCACGTTT_TCGACACC	2	neural plate - anterior	ZF_Neuroectoderm	8
DEW047_TGACTACCGTT_GAAGTGCC	14	tailbud - spinal cord	ZF_Tailbud	8
DEW047_GACACGGACT_ATATCTTC	14	epidermal	ZF_Non-neural ectoderm	8
DEW047_GAATTCCTTG_GAATACGC	11	tailbud - PSM	ZF_Presomitic mesoderm	8
DEW047_ATTTGGGAG_CTTCAGGT	2	neural plate - anterior	ZF_Neuroectoderm	8
DEW047_AGAGGTGG_GTTCAACT	63	prechordal plate	ZF_Dorsal organizer	8
DEW047_TGACTCGCGTA_AGCTACGG	22	tailbud - spinal cord	ZF_Tailbud	8
DEW047_TGAGTACACTC_ACTTCAAT	74	neural plate - posterior	ZF_Neuroectoderm	8
DEW047_AGGGAACGA_GAGTTTCG	2	neural plate - posterior	ZF_Neuroectoderm	8
DEW047_GACGACTCCT_CTGCGTTG	14	epidermal	ZF_Non-neural ectoderm	8
DEW047_ATTCCAGAC_GGAGAAGC	2	neural plate - anterior	ZF_Neuroectoderm	8
DEW047_AGTGTCGGA_TGGTTTCT	11	mesoderm - lateral plate	ZF_Intermediate mesoderm	8
DEW047_TGACTCGCGTA_CCTGTTAT	2	neural plate - anterior	ZF_Neuroectoderm	8
DEW047_ATATGCAT_AGCACCAC	2	neural plate - anterior	ZF_Neuroectoderm	8
DEW047_TTATCTGT_CATACATT	2	neural plate - anterior	ZF_Neuroectoderm	8
DEW047_TAAATAGG_CGCTCTCA	11	apoptotic-like 2	ZF_Apoptotic-like 2	8
DEW047_AAATGAATG_CAACGTGG	14	epidermal	ZF_Non-neural ectoderm	8
DEW047_TGACACTTTCT_GGGAACCT	14	epidermal	ZF_Non-neural ectoderm	8
DEW047_AATGTTTG_GGCATGCT	22	neural plate - posterior	ZF_Neuroectoderm	8
DEW047_TGGCTACC_GACAAAGG	14	epidermal	ZF_Non-neural ectoderm	8
DEW047_GATCGTTT_GGCGTTAG	2	neural plate - anterior	ZF_Neuroectoderm	8
DEW047_TACCGGCA_ATCAAGTG	65	endoderm	ZF_Endoderm	8
DEW047_GATTGATCTA_TCCAGTCC	22	neural plate - posterior	ZF_Neuroectoderm	8
DEW047_TGAATGACTTT_AAACAGGG	11	tailbud - PSM	ZF_Presomitic mesoderm	8
DEW047_GAGGGAACCT_GGTCACAG	14	epidermal	ZF_Non-neural ectoderm	8
DEW047_TGAGCGCATTC_AAGATTGT	11	tailbud - PSM	ZF_Presomitic mesoderm	8
DEW047_GATTTAACAG_GGCCTAAG	14	epidermal	ZF_Non-neural ectoderm	8
DEW047_GACCCATAGC_TTTATCAC	63	notocord	ZF_Notochord	8
DEW047_AGAAGTGCC_CAAGTCAT	65	endoderm	ZF_Endoderm	8
DEW047_GAGAAAGACC_CTAGACCC	2	neural plate - anterior	ZF_Neuroectoderm	8
DEW047_GAGACAGATA_GTTTACGT	14	neural plate - anterior	ZF_Neuroectoderm	8
DEW047_TGATTGTTTAC_GTTACGAT	2	neural plate - posterior	ZF_Neuroectoderm	8
DEW047_ACGGAATTT_AAGGTAAT	14	epidermal	ZF_Non-neural ectoderm	8
DEW047_GATGTAGTTT_CTTTCTTT	14	epidermal	ZF_Non-neural ectoderm	8
DEW047_AAGTGAAAG_ATACCCAG	2	neural plate - anterior	ZF_Neuroectoderm	8
DEW047_TGCCTCAC_GATTGCGA	2	neural plate - anterior	ZF_Neuroectoderm	8
DEW047_GAACAGCGGA_ATATCTTC	14	epidermal	ZF_Non-neural ectoderm	8
DEW047_TCATATGG_AGACACCA	2	neural plate - anterior	ZF_Neuroectoderm	8
DEW047_TTATCTGT_CGACTCCT	2	neural plate - posterior	ZF_Neuroectoderm	8
DEW047_TTCCGCTC_GTTTGTTT	22	neural plate - posterior	ZF_Neuroectoderm	8
DEW047_AAGCTATGA_GGAAACAG	2	neural plate - anterior	ZF_Neuroectoderm	8
DEW047_TGAAGAAGTTA_GATGTGAG	22	neural plate - posterior	ZF_Neuroectoderm	8
DEW047_AGTCAAAGA_ATATAGGA	2	apoptotic-like	ZF_Apoptotic-like	8
DEW047_GAGACAGATA_CCCTAACC	22	tailbud - spinal cord	ZF_Tailbud	8
DEW047_GAAAGATTGT_AATCGGGT	2	neural plate - anterior	ZF_Neuroectoderm	8
DEW047_GATGTACACG_CTTCGATT	2	neural plate - anterior	ZF_Neuroectoderm	8
DEW047_TGATTAGTCCG_AGGAAGAC	65	endoderm	ZF_Endoderm	8
DEW047_TGCGACAG_GTCCAAAG	22	tailbud - spinal cord	ZF_Tailbud	8
DEW047_CGAACGTA_GCAACCTG	2	neural plate - anterior	ZF_Neuroectoderm	8
DEW047_GATGAGGTCT_AGCGCGAT	11	tailbud - PSM	ZF_Presomitic mesoderm	8
DEW047_AAAGGTAAT_CATCGCAG	22	tailbud - spinal cord	ZF_Tailbud	8
DEW047_ATCTGCATC_CAAGAGGG	2	neural plate - anterior	ZF_Neuroectoderm	8
DEW047_TGAAGAAGTTA_GCCGGATT	14	epidermal	ZF_Non-neural ectoderm	8
DEW047_GAAGGCAGTT_TTGCATAT	2	neural plate - anterior	ZF_Neuroectoderm	8
DEW047_CTATAGAG_GGGAAATC	14	epidermal	ZF_Non-neural ectoderm	8
DEW047_GAAAGCGTAC_AAGTAATC	2	neural plate - anterior	ZF_Neuroectoderm	8
DEW047_AACGCAGAG_TGTTTGAG	14	tailbud - spinal cord	ZF_Tailbud	8
DEW047_TGAAGCGCGAT_GGCTACTA	2	neural plate - anterior	ZF_Neuroectoderm	8
DEW047_GATGTACACG_ATCAAGTG	2	neural plate - posterior	ZF_Neuroectoderm	8
DEW047_TAGCTTAT_GTGTAACC	22	tailbud - spinal cord	ZF_Tailbud	8
DEW047_TGAGGTCTGAC_GTTGCACG	14	epidermal	ZF_Non-neural ectoderm	8
DEW047_TGACTTCGCAC_AGCGAAGT	11	tailbud - PSM	ZF_Presomitic mesoderm	8
DEW047_ACGTATAC_GGGAAATC	2	apoptotic-like	ZF_Apoptotic-like	8
DEW047_AGTCAATAC_TGCTCCGT	2	neural plate - anterior	ZF_Neuroectoderm	8
DEW047_TGAGGGAAATC_AAACGCCT	14	tailbud - spinal cord	ZF_Tailbud	8
DEW047_ATGGCCTGT_AGCGCCTT	22	tailbud - spinal cord	ZF_Tailbud	8
DEW047_ATCGGTTCG_CTTTCTTT	14	epidermal	ZF_Non-neural ectoderm	8
DEW047_TGATCGTCATG_TGATGCCC	65	endoderm	ZF_Endoderm	8
DEW047_ATCGGTTCG_GACAACTT	2	neural plate - anterior	ZF_Neuroectoderm	8
DEW047_GGCATGCT_AATGTTTG	63	notocord	ZF_Notochord	8
DEW047_AAAAGTCGG_TGGTTTCT	14	tailbud - spinal cord	ZF_Tailbud	8
DEW047_GACCTGACAC_AGCGTAGG	2	neural plate - anterior	ZF_Neuroectoderm	8
DEW047_ACAACGTGG_TAAGACGG	11	tailbud - PSM	ZF_Presomitic mesoderm	8
DEW047_TGAGTAATCCC_AGATGGCT	2	neural plate - anterior	ZF_Neuroectoderm	8
DEW047_GATTGATCTA_GGCATGCT	2	neural plate - anterior	ZF_Neuroectoderm	8
DEW047_TGATGTCTTTC_ATGTTGGC	22	tailbud - spinal cord	ZF_Tailbud	8
DEW047_ACCCACGA_AACACACG	14	epidermal	ZF_Non-neural ectoderm	8
DEW047_GACTAGACCC_TCATGAGG	2	neural plate - anterior	ZF_Neuroectoderm	8
DEW047_ATAGTGGAC_GGGAACCT	14	epidermal	ZF_Non-neural ectoderm	8
DEW047_CCCAAGCA_TTGGCGTT	11	mesoderm - lateral plate	ZF_Intermediate mesoderm	8
DEW047_ACAACGTGG_GGGAAATC	14	epidermal	ZF_Non-neural ectoderm	8
DEW047_CGCTAATA_TGATAACA	14	neural plate - anterior	ZF_Neuroectoderm	8
DEW047_TGACTTCTGGA_AATGAATG	2	neural plate - anterior	ZF_Neuroectoderm	8
DEW047_ACGGAATTT_CCTGACAC	2	neural plate - anterior	ZF_Neuroectoderm	8
DEW047_TGATATTGCCT_TCCAGGGA	63	mesoderm - lateral plate	ZF_Intermediate mesoderm	8
DEW047_GATCCCAATC_AAGCGTAC	2	neural plate - anterior	ZF_Neuroectoderm	8
DEW047_TGATCGACACC_AGAACGGG	22	neural plate - posterior	ZF_Neuroectoderm	8
DEW047_GAGGCGTTAG_AGCGCGAT	63	notocord	ZF_Notochord	8
DEW047_AAGATGGCT_GCCAAGAT	2	neural plate - anterior	ZF_Neuroectoderm	8
DEW047_GAGAAAGACC_GCAACCTG	2	tailbud - spinal cord	ZF_Tailbud	8
DEW047_GAGACAGATA_CAGACCAT	22	tailbud - spinal cord	ZF_Tailbud	8
DEW047_CCGCTGTT_AACAATCC	14	epidermal	ZF_Non-neural ectoderm	8
DEW047_GATCCCAATC_GAGTTTCG	22	neural plate - posterior	ZF_Neuroectoderm	8
DEW047_AGCCAAGAT_GTTACCGC	11	tailbud - PSM	ZF_Presomitic mesoderm	8
DEW047_GAGAATTCGT_GGGAAGGT	14	epidermal	ZF_Non-neural ectoderm	8
DEW047_TGACACAACAG_CTAGACCC	2	tailbud - spinal cord	ZF_Tailbud	8
DEW047_CTTCGATT_CGAATAAT	2	neural plate - anterior	ZF_Neuroectoderm	8
DEW047_GTACCTTG_TGTGTCCT	14	tailbud - spinal cord	ZF_Tailbud	8
DEW047_TAGCCTCG_ATTGGGCC	22	tailbud - spinal cord	ZF_Tailbud	8
DEW047_ACAGGTGTC_TTTACCCT	14	epidermal	ZF_Non-neural ectoderm	8
DEW047_GATCGGTTTA_CAAGTCAT	11	tailbud - PSM	ZF_Presomitic mesoderm	8
DEW047_AACGCAGAG_ACCCATAT	2	neural plate - posterior	ZF_Neuroectoderm	8
DEW047_TGACGTATCGG_GCTTTCCA	2	neural plate - anterior	ZF_Neuroectoderm	8
DEW047_GACCACATTA_GCCACATC	22	tailbud - spinal cord	ZF_Tailbud	8
DEW047_TCATATGG_CGCTAGTC	2	neural plate - anterior	ZF_Neuroectoderm	8
DEW047_AGTGTCGGA_CACAAGGC	22	tailbud - spinal cord	ZF_Tailbud	8
DEW047_GAAAGATTGT_GTACACTC	2	neural plate - anterior	ZF_Neuroectoderm	8
DEW047_CTTCAGGT_GCCGGATT	11	mesoderm - lateral plate	ZF_Intermediate mesoderm	8
DEW047_ATTGTGACT_AAACTGGT	22	tailbud - spinal cord	ZF_Tailbud	8
DEW047_ATTCGTTCC_TTTATCAC	63	notocord	ZF_Notochord	8
DEW047_GAAAGATTGT_ACCTTGCC	2	neural plate - anterior	ZF_Neuroectoderm	8
DEW047_CCGCTGTT_GTTGTCAT	22	tailbud - spinal cord	ZF_Tailbud	8
DEW047_CAGTTTGC_CTCCGCAT	22	tailbud - spinal cord	ZF_Tailbud	8
DEW047_GACGACTCCT_GCAAGGAC	2	neural plate - anterior	ZF_Neuroectoderm	8
DEW047_GAAGGCAGTT_AAACAGGG	2	neural plate - anterior	ZF_Neuroectoderm	8
DEW047_GACGCCTTGA_GTACACTC	2	neural plate - anterior	ZF_Neuroectoderm	8
DEW047_TGAATATAGGA_ATCCCACG	14	epidermal	ZF_Non-neural ectoderm	8
DEW047_GACGAGATGT_CATCTCCC	11	apoptotic-like 2	ZF_Apoptotic-like 2	8
DEW047_GACAAGAGGG_AAAGCCTA	11	tailbud - PSM	ZF_Presomitic mesoderm	8
DEW047_GAATGGAAAT_GAGGCTGA	14	epidermal	ZF_Non-neural ectoderm	8
DEW047_ATTTGGGAG_GTACACTC	14	tailbud - spinal cord	ZF_Tailbud	8
DEW047_AGTCAATAC_AGGAGCTT	14	epidermal	ZF_Non-neural ectoderm	8
DEW047_TGAATTCGACG_GTGGAGCT	11	tailbud - PSM	ZF_Presomitic mesoderm	8
DEW047_GATGTTCCAG_CTGAGTGC	22	tailbud - spinal cord	ZF_Tailbud	8
DEW047_TTTGTGTC_GTTGCACG	2	neural plate - anterior	ZF_Neuroectoderm	8
DEW047_ACAGATTAC_TGGCTACC	22	tailbud - spinal cord	ZF_Tailbud	8
DEW047_ACGTATAC_CGCTAATA	2	neural plate - anterior	ZF_Neuroectoderm	8
DEW047_ATTCGTTCC_GATGTGAG	22	neural plate - posterior	ZF_Neuroectoderm	8
DEW047_GATGAGGTCT_AAGTAATC	2	apoptotic-like	ZF_Apoptotic-like	8
DEW047_TGAACATCTAT_CGAATAAT	2	neural plate - anterior	ZF_Neuroectoderm	8
DEW047_TGAGCCGGATT_TCGGTTTA	2	neural plate - anterior	ZF_Neuroectoderm	8
DEW047_TGACTACGAGC_CTACGAGC	11	mesoderm - lateral plate	ZF_Intermediate mesoderm	8
DEW047_TAAATAGG_CGGGCTTT	11	apoptotic-like 2	ZF_Apoptotic-like 2	8
DEW047_GAATTCCTTG_CAACGTGG	11	tailbud - PSM	ZF_Presomitic mesoderm	8
DEW047_TGAAAACTGGT_ACGGTAGC	11	tailbud - PSM	ZF_Presomitic mesoderm	8
DEW047_AGATGTATT_TGCGTATC	11	tailbud - PSM	ZF_Presomitic mesoderm	8
DEW047_TGAACATCTAT_GGGCCAAT	2	neural plate - anterior	ZF_Neuroectoderm	8
DEW047_GATCTCAACC_GTTACCGC	11	tailbud - PSM	ZF_Presomitic mesoderm	8
DEW047_GAGAATACGC_TTCCAGAC	22	neural plate - posterior	ZF_Neuroectoderm	8
DEW047_TTGGACTT_GGAATAGA	11	mesoderm - lateral plate	ZF_Intermediate mesoderm	8
DEW047_TGAGTAATCCC_ATGAAGCA	11	mesoderm - adaxial cells	ZF_Presomitic mesoderm	8
DEW047_GAATCAAGTG_TGACGGAC	11	tailbud - PSM	ZF_Presomitic mesoderm	8
DEW047_ATTTGGGAG_AAATCGTT	22	tailbud - spinal cord	ZF_Tailbud	8
DEW047_TGAGGCGGTTT_TGCCTCAC	2	neural plate - anterior	ZF_Neuroectoderm	8
DEW047_ATTTATCAC_TGACCCTC	22	neural plate - anterior	ZF_Neuroectoderm	8
DEW047_TTCCGCTC_TCACGTTT	2	neural plate - anterior	ZF_Neuroectoderm	8
DEW047_AGTTTACGT_GAGCGGTA	11	tailbud - PSM	ZF_Presomitic mesoderm	8
DEW047_ATGTGTCCT_ACCCATAT	14	tailbud - spinal cord	ZF_Tailbud	8
DEW047_GAAGGCAGTT_ACTGAGTT	2	neural plate - posterior	ZF_Neuroectoderm	8
DEW047_ACCCGACTT_AGGAGCTT	22	tailbud - spinal cord	ZF_Tailbud	8
DEW047_GGAAACAG_ACGCAGAG	63	notocord	ZF_Notochord	8
DEW047_TGAGCAGGGTA_ACTGAGTT	11	apoptotic-like 2	ZF_Apoptotic-like 2	8
DEW047_TGAGTTCTGTT_TGGTTTCT	2	neural plate - anterior	ZF_Neuroectoderm	8
DEW047_AGTATGAGT_ACATCTAT	2	apoptotic-like	ZF_Apoptotic-like	8
DEW047_TGGTATGA_TAGTGTTT	2	apoptotic-like	ZF_Apoptotic-like	8
DEW047_AGGTGACAC_TCCCAATC	22	neural plate - posterior	ZF_Neuroectoderm	8
DEW047_ACTGCGTTG_TTGATTCT	2	neural plate - anterior	ZF_Neuroectoderm	8
DEW047_TGAGCAAGGAC_CTCAGAAT	2	neural plate - anterior	ZF_Neuroectoderm	8
DEW047_TGATCGACGGT_CTTCTTCG	14	epidermal	ZF_Non-neural ectoderm	8
DEW047_AATATACCT_GTTAACCA	2	neural plate - anterior	ZF_Neuroectoderm	8
DEW047_ATTCGTTCC_GATGTATT	2	neural plate - anterior	ZF_Neuroectoderm	8
DEW047_ACTGAGTGC_TCACCGAG	22	neural plate - posterior	ZF_Neuroectoderm	8
DEW047_AGTTTACGT_GAAGGCTT	11	tailbud - PSM	ZF_Presomitic mesoderm	8
DEW047_GACCCTTCAG_CCATTACT	2	neural plate - anterior	ZF_Neuroectoderm	8
DEW047_TGAAACACACG_TGCAAGGG	14	epidermal	ZF_Non-neural ectoderm	8
DEW047_TGATAACCCGT_CATCGCAG	65	endoderm	ZF_Endoderm	8
DEW047_AAGTGAAAG_AGGAGCTT	22	tailbud - spinal cord	ZF_Tailbud	8
DEW047_TGATGCCC_GATCGTTT	65	endoderm	ZF_Endoderm	8
DEW047_TGAGGGAAATC_ATATCTTC	14	epidermal	ZF_Non-neural ectoderm	8
DEW047_CCCAAGCA_GATCGTTT	2	neural plate - anterior	ZF_Neuroectoderm	8
DEW047_ATCTAGCAG_ACTAGGAT	63	notocord	ZF_Notochord	8
DEW047_GATGGTTTCT_GACAAAGG	22	tailbud - spinal cord	ZF_Tailbud	8
DEW047_TGAAAACAGGG_ACGGTAGC	2	neural plate - anterior	ZF_Neuroectoderm	8
DEW047_AAAACCTCC_ACACTAAG	2	neural plate - anterior	ZF_Neuroectoderm	8
DEW047_GAGGGAGGTA_CAACGTGG	22	tailbud - spinal cord	ZF_Tailbud	8
DEW047_AACTTAGC_GTTTGTTT	2	neural plate - anterior	ZF_Neuroectoderm	8
DEW047_AGAACGATT_GTAACGTT	2	neural plate - anterior	ZF_Neuroectoderm	8
DEW047_TGAGAGTTCAC_CGAGTCTG	22	tailbud - spinal cord	ZF_Tailbud	8
DEW047_ATCTTTGT_GCTTTGGC	14	epidermal	ZF_Non-neural ectoderm	8
DEW047_GATGACCCTC_CTTCGCAC	22	tailbud - spinal cord	ZF_Tailbud	8
DEW047_AGAAGTGCC_AAACAGGG	11	tailbud - PSM	ZF_Presomitic mesoderm	8
DEW047_AAAACCTCC_GGGTGTAT	2	neural plate - anterior	ZF_Neuroectoderm	8
DEW047_AGTCAAAGA_GATTGCGA	11	tailbud - PSM	ZF_Presomitic mesoderm	8
DEW047_TGAACATCTAT_ATGGATTA	22	tailbud - spinal cord	ZF_Tailbud	8
DEW047_TGAGCCGGATT_CTGTCTGG	2	neural plate - anterior	ZF_Neuroectoderm	8
DEW047_TGAGTAATCCC_CTCCGCAT	22	neural plate - posterior	ZF_Neuroectoderm	8
DEW047_TGACTTCGCAC_CGTAGAAG	22	neural plate - posterior	ZF_Neuroectoderm	8
DEW047_ACCCTAACC_GATGTGAG	2	neural plate - anterior	ZF_Neuroectoderm	8
DEW047_AAAACTCGA_CAAGTCAT	14	tailbud - spinal cord	ZF_Tailbud	8
DEW047_TGAGGTTTCTC_ACTCACCG	14	epidermal	ZF_Non-neural ectoderm	8
DEW047_GAAGGAAGAC_GAGTTTCG	65	endoderm	ZF_Endoderm	8
DEW047_TCATCCTT_AAACCTCC	14	epidermal	ZF_Non-neural ectoderm	8
DEW047_AGGTGACAC_GTCAAAGA	2	neural plate - anterior	ZF_Neuroectoderm	8
DEW047_AATATACCT_GATTTACC	2	neural plate - posterior	ZF_Neuroectoderm	8
DEW047_GTTCAACT_CTGAGTGC	14	neural plate - anterior	ZF_Neuroectoderm	8
DEW047_CGAACGTA_CGCTCTCA	2	neural plate - anterior	ZF_Neuroectoderm	8
DEW047_GATAAGACGG_CCTACTAG	11	apoptotic-like 2	ZF_Apoptotic-like 2	8
DEW047_TGAACGCTCAG_ACCCACGA	22	tailbud - spinal cord	ZF_Tailbud	8
DEW047_AGGTGACAC_TTGGATCG	2	neural plate - anterior	ZF_Neuroectoderm	8
DEW047_GACCCATAGC_GGGAAGGT	2	apoptotic-like	ZF_Apoptotic-like	8
DEW047_TGATTGTCGCC_CTTACGGG	2	neural plate - anterior	ZF_Neuroectoderm	8
DEW047_TGACACAGTTT_ACCTTCTT	2	neural plate - posterior	ZF_Neuroectoderm	8
DEW047_TGAAGGATTCA_GACAACTT	2	neural plate - anterior	ZF_Neuroectoderm	8
DEW047_ACTGCGTTG_GCAAGGAC	2	tailbud - spinal cord	ZF_Tailbud	8
DEW047_GATTAGAC_TGCAAGGG	2	neural plate - anterior	ZF_Neuroectoderm	8
DEW047_TGACTTCGCAC_CTTCAGGT	22	neural plate - posterior	ZF_Neuroectoderm	8
DEW047_TGACCAGCAGT_CCTCGTCT	2	neural plate - anterior	ZF_Neuroectoderm	8
DEW047_TGATTCACATA_TGGTTTCT	2	neural plate - anterior	ZF_Neuroectoderm	8
DEW047_AAGCTACGG_TCACCGAG	2	neural plate - anterior	ZF_Neuroectoderm	8
DEW047_TGAGAGGCTGA_GGTTTCTC	2	neural plate - posterior	ZF_Neuroectoderm	8
DEW047_TGATCCCGTAG_GGCGTTAG	14	epidermal	ZF_Non-neural ectoderm	8
DEW047_GTCTCTCT_CCCGAATG	2	neural plate - anterior	ZF_Neuroectoderm	8
DEW047_ACTCCGCAT_TGTTCCAG	11	mesoderm - lateral plate	ZF_Intermediate mesoderm	8
DEW047_GAAGTGATGC_ATGCATGG	11	tailbud - PSM	ZF_Presomitic mesoderm	8
DEW047_AATACTCTT_TCGGTTCG	11	tailbud - PSM	ZF_Presomitic mesoderm	8
DEW047_GAATTCCTTG_ATATACCT	11	tailbud - PSM	ZF_Presomitic mesoderm	8
DEW047_AGTATGAGT_CTGTCTGG	14	epidermal	ZF_Non-neural ectoderm	8
DEW047_ACTGAGTGC_CCCTTGGT	11	tailbud - PSM	ZF_Presomitic mesoderm	8
DEW047_TGACTTGGTGT_AGCGCGAT	65	endoderm	ZF_Endoderm	8
DEW047_AACGAAACG_ATGACTTT	14	epidermal	ZF_Non-neural ectoderm	8
DEW047_TGAAACCCTTG_TCATATGG	22	tailbud - spinal cord	ZF_Tailbud	8
DEW047_TGAGCGCATTC_GGACTTCC	2	neural plate - anterior	ZF_Neuroectoderm	8
DEW047_GACCCTTCAG_GGTCCCTT	14	epidermal	ZF_Non-neural ectoderm	8
DEW047_GGAAACAG_TGGGATTC	2	tailbud - spinal cord	ZF_Tailbud	8
DEW047_AATGCGGAT_CTAGATTG	74	neural plate - anterior	ZF_Neuroectoderm	8
DEW047_GATTAGAC_AACACACG	11	tailbud - PSM	ZF_Presomitic mesoderm	8
DEW047_TGATTAGTCCG_CTATAGAG	2	neural plate - anterior	ZF_Neuroectoderm	8
DEW047_CCGCTGTT_GGTGACAC	2	neural plate - posterior	ZF_Neuroectoderm	8
DEW047_AGTATGAGT_TGGTTTCT	2	tailbud - spinal cord	ZF_Tailbud	8
DEW047_TGAGGGAAATC_TAACCCGT	14	epidermal	ZF_Non-neural ectoderm	8
DEW047_ACTCCGCAT_AAGCTTCT	2	neural plate - anterior	ZF_Neuroectoderm	8
DEW047_TGAGGAATAGA_CCGTGTTT	2	neural plate - anterior	ZF_Neuroectoderm	8
DEW047_GATTCCGAGT_GGTCCCTT	65	endoderm	ZF_Endoderm	8
DEW047_GAACACTAAG_TGCAAGGG	11	mesoderm - lateral plate	ZF_Intermediate mesoderm	8
DEW047_TGACTCGCGTA_TGCTATTT	14	epidermal	ZF_Non-neural ectoderm	8
DEW047_AAATGACCC_CGCTAATA	63	prechordal plate	ZF_Dorsal organizer	8
DEW047_AGCACCTCT_AGCGCGAT	2	neural plate - anterior	ZF_Neuroectoderm	8
DEW047_GAGAAGGCTT_CTTCTTCG	2	neural plate - anterior	ZF_Neuroectoderm	8
DEW047_TGACAATACTT_CAACAAAT	11	mesoderm - lateral plate	ZF_Intermediate mesoderm	8
DEW047_ATTAGGACC_TTGTTTAC	2	neural plate - anterior	ZF_Neuroectoderm	8
DEW047_AGATGTATT_CGTACCTA	2	neural plate - posterior	ZF_Neuroectoderm	8
DEW047_GACGACTCCT_GTTACCGC	2	neural plate - anterior	ZF_Neuroectoderm	8
DEW047_GAGCGGTA_GGTGACAC	2	neural plate - anterior	ZF_Neuroectoderm	8
DEW047_TGAAAACTGGT_TAGTGTTT	2	neural plate - anterior	ZF_Neuroectoderm	8
DEW047_GACCACATTA_GGAATAGA	22	tailbud - spinal cord	ZF_Tailbud	8
DEW047_TGAGGTTTCTC_CGTGGATA	2	neural plate - posterior	ZF_Neuroectoderm	8
DEW047_ATCTAGCAG_CGGCTTAC	11	mesoderm - lateral plate	ZF_Intermediate mesoderm	8
DEW047_TGATATTGCCT_CCTACTAG	11	tailbud - PSM	ZF_Presomitic mesoderm	8
DEW047_GAGGGAACCT_GCAAGGAC	14	tailbud - spinal cord	ZF_Tailbud	8
DEW047_ACCCTAACC_CTGAGTGC	14	epidermal	ZF_Non-neural ectoderm	8
DEW047_GATCGGTACG_GGTCCCTT	2	neural plate - posterior	ZF_Neuroectoderm	8
DEW047_TGACAGACCAT_AGACACCA	14	tailbud - spinal cord	ZF_Tailbud	8
DEW047_AACTTAGC_AGGAGCTT	11	tailbud - PSM	ZF_Presomitic mesoderm	8
DEW047_GATACAAACT_CCCATCTG	11	mesoderm - adaxial cells	ZF_Presomitic mesoderm	8
DEW047_TGATCGACGGT_ATATCTTC	2	neural plate - posterior	ZF_Neuroectoderm	8
DEW047_ACGCTCTCA_CTATAGAG	14	epidermal	ZF_Non-neural ectoderm	8
DEW047_TGAATGAAGCA_CGATTGAT	11	mesoderm - lateral plate	ZF_Intermediate mesoderm	8
DEW047_TGAGGCTACTA_GATTGCGA	2	neural plate - anterior	ZF_Neuroectoderm	8
DEW047_ACTAGATTG_GGTCACAG	2	neural plate - anterior	ZF_Neuroectoderm	8
DEW047_TGACTCGATGC_CTATAGAG	2	tailbud - spinal cord	ZF_Tailbud	8
DEW047_TGCTATTT_TTAAGCGT	2	neural plate - anterior	ZF_Neuroectoderm	8
DEW047_GCTCTAGT_CGTCAGCA	2	neural plate - anterior	ZF_Neuroectoderm	8
DEW047_TTCGGCCT_CGTATCGG	11	tailbud - PSM	ZF_Presomitic mesoderm	8
DEW047_GATCCCAATC_CCGCAACT	63	notocord	ZF_Notochord	8
DEW047_GAACGCCATT_CGTAGAAG	63	notocord	ZF_Notochord	8
DEW047_GACCCTTCAG_CATCTCCC	63	prechordal plate	ZF_Dorsal organizer	8
DEW047_GATGAAATGA_ATGAAGCA	11	tailbud - PSM	ZF_Presomitic mesoderm	8
DEW047_TGGCTACC_CAAGTCAT	11	apoptotic-like 2	ZF_Apoptotic-like 2	8
DEW047_ACTTAGGTA_ACAGCGGA	14	tailbud - spinal cord	ZF_Tailbud	8
DEW047_TGAATACCCAG_ATATCTTC	11	mesoderm - lateral plate	ZF_Intermediate mesoderm	8
DEW047_ATCGGTTCG_TCCCGTAG	63	prechordal plate	ZF_Dorsal organizer	8
DEW047_AGGCCTAAG_AACACACG	22	tailbud - spinal cord	ZF_Tailbud	8
DEW047_ACAGGTGTC_CCCATCTG	2	neural plate - anterior	ZF_Neuroectoderm	8
DEW047_TTAAGCGT_CTTGGTGT	22	neural plate - posterior	ZF_Neuroectoderm	8
DEW047_TGATTAGTCCG_ATCTTTGT	14	epidermal	ZF_Non-neural ectoderm	8
DEW047_ATATGCAT_GCCACATC	22	neural plate - posterior	ZF_Neuroectoderm	8
DEW047_GCATGGGT_CTGGTGCA	63	notocord	ZF_Notochord	8
DEW047_TGCGACAG_ACTTCAAT	65	endoderm	ZF_Endoderm	8
DEW047_ATAGTGGAC_GTCAAAGA	63	notocord	ZF_Notochord	8
DEW047_CCAACCGT_CATACATT	14	tailbud - spinal cord	ZF_Tailbud	8
DEW047_GATGACGGAC_TTGGATCG	11	apoptotic-like 2	ZF_Apoptotic-like 2	8
DEW047_GGAAACAG_TTAAACTG	14	epidermal	ZF_Non-neural ectoderm	8
DEW047_AGTGTCGGA_ACACTAAG	2	neural plate - anterior	ZF_Neuroectoderm	8
DEW047_ACCCACGA_GACAACTT	14	epidermal	ZF_Non-neural ectoderm	8
DEW047_ATTAGGACC_TTGTCGCC	2	neural plate - anterior	ZF_Neuroectoderm	8
DEW047_GATCCCAATC_ACATCTAT	2	neural plate - anterior	ZF_Neuroectoderm	8
DEW047_TGACAACAAAT_TTTGTGTC	22	tailbud - spinal cord	ZF_Tailbud	8
DEW047_CGGCTTAC_AGCAGAAC	14	epidermal	ZF_Non-neural ectoderm	8
DEW047_GAATCAAGTG_GAGTTTCG	22	tailbud - spinal cord	ZF_Tailbud	8
DEW047_GTACCTTG_GGGTGTAT	11	mesoderm - lateral plate	ZF_Intermediate mesoderm	8
DEW047_TAGTCTAG_GAAGTGCC	22	neural plate - posterior	ZF_Neuroectoderm	8
DEW047_ACCTTCTT_GTTGTCAT	11	tailbud - PSM	ZF_Presomitic mesoderm	8
DEW047_GACGCCTTGA_TTGGCGTT	14	epidermal	ZF_Non-neural ectoderm	8
DEW047_ATTTATCAC_CACTTTCT	2	neural plate - anterior	ZF_Neuroectoderm	8
DEW047_GAGGACTTCC_CTCAGAAT	11	tailbud - PSM	ZF_Presomitic mesoderm	8
DEW047_TGATGCCC_GCTTTGGC	2	neural plate - anterior	ZF_Neuroectoderm	8
DEW047_TGGTATGA_AGGATTCA	14	epidermal	ZF_Non-neural ectoderm	8
DEW047_TGACTCGATGC_GCAACCTG	11	mesoderm - adaxial cells	ZF_Presomitic mesoderm	8
DEW047_GATCCCAATC_GAGAATTG	2	neural plate - anterior	ZF_Neuroectoderm	8
DEW047_GACATCTCCC_GTCGTCGT	11	tailbud - PSM	ZF_Presomitic mesoderm	8
DEW047_TGACAATACTT_GGCGTTAG	14	epidermal	ZF_Non-neural ectoderm	8
DEW047_TGATTTACCCT_ACCTTGCC	2	neural plate - anterior	ZF_Neuroectoderm	8
DEW047_TGAGCGCATTC_GGGAAATC	14	epidermal	ZF_Non-neural ectoderm	8
DEW047_GACCTGACAC_ACTAGGAT	65	endoderm	ZF_Endoderm	8
DEW047_GATGTAGTTT_CACTTTCT	63	notocord	ZF_Notochord	8
DEW047_TGAGTAATCCC_GTTTGTTT	2	neural plate - anterior	ZF_Neuroectoderm	8
DEW047_TGACACAACAG_CGAATAAT	2	neural plate - posterior	ZF_Neuroectoderm	8
DEW047_TGAATTCGACG_GTACCTTG	74	tailbud - spinal cord	ZF_Tailbud	8
DEW047_ATAGTCGCA_GTTAACCA	14	epidermal	ZF_Non-neural ectoderm	8
DEW047_TGACATACATT_AGCTATGA	14	tailbud - spinal cord	ZF_Tailbud	8
DEW047_TCGAAGCT_GCTCTAGT	2	neural plate - anterior	ZF_Neuroectoderm	8
DEW047_TGAAGGATTCA_CAAGAGGG	22	tailbud - spinal cord	ZF_Tailbud	8
DEW047_GGAAACAG_CGTACCTA	22	neural plate - posterior	ZF_Neuroectoderm	8
DEW047_TGAGATTTACC_CGCCTTGA	65	endoderm	ZF_Endoderm	8
DEW047_GAAGTGATGC_GGCGTTAG	14	tailbud - spinal cord	ZF_Tailbud	8
DEW047_GGTGGGAT_TCACGTTT	2	neural plate - anterior	ZF_Neuroectoderm	8
DEW047_TGAAGGTTGTG_GATTAGAC	2	neural plate - posterior	ZF_Neuroectoderm	8
DEW047_AAGCTACGG_AATGTTTG	2	neural plate - anterior	ZF_Neuroectoderm	8
DEW047_ACTGCGTTG_CGTAGAAG	2	neural plate - anterior	ZF_Neuroectoderm	8
DEW047_AGAAGTCC_GTCAAAGA	22	neural plate - posterior	ZF_Neuroectoderm	8
DEW047_TGACTTCGCAC_ATTCGACG	2	apoptotic-like	ZF_Apoptotic-like	8
DEW047_TGATCGACGGT_TGGTATGA	2	tailbud - spinal cord	ZF_Tailbud	8
DEW047_TGACCTCGTCT_AGCGCCTT	14	tailbud - spinal cord	ZF_Tailbud	8
DEW047_GAGGTCCCTT_TGCGTATC	65	endoderm	ZF_Endoderm	8
DEW047_TGAGTAATCCC_AAGCGTAC	22	tailbud - spinal cord	ZF_Tailbud	8
DEW047_TTCCGCTC_TGCAAGGG	11	tailbud - PSM	ZF_Presomitic mesoderm	8
DEW047_TGAAGAAGTTA_AGCTATGA	11	apoptotic-like 2	ZF_Apoptotic-like 2	8
DEW047_AACCCATAT_TTTGGGAG	2	tailbud - spinal cord	ZF_Tailbud	8
DEW047_TAAATAGG_TCCCAATC	14	tailbud - spinal cord	ZF_Tailbud	8
DEW047_GACGACTCCT_ATCCCACG	22	neural plate - posterior	ZF_Neuroectoderm	8
DEW047_TGATTAGTCCG_ATCCGCTA	2	neural plate - anterior	ZF_Neuroectoderm	8
DEW047_AACCCATAT_ATCCGCTA	14	epidermal	ZF_Non-neural ectoderm	8
DEW047_ATCTTTGT_TCACCGAG	65	endoderm	ZF_Endoderm	8
DEW047_GACGGGCTTT_GCAAAGCC	65	endoderm	ZF_Endoderm	8
DEW047_TGAGGAATAGA_CGGCACAT	2	neural plate - anterior	ZF_Neuroectoderm	8
DEW047_GATCGGTTTA_TATTGCCT	22	neural plate - posterior	ZF_Neuroectoderm	8
DEW047_TGAATACCCAG_GCCAAGAT	2	neural plate - anterior	ZF_Neuroectoderm	8
DEW047_GAGAAGGCTT_CGCTAGTC	22	neural plate - posterior	ZF_Neuroectoderm	8
DEW047_AATATCTTC_CACTTTCT	14	tailbud - spinal cord	ZF_Tailbud	8
DEW047_GCTTACCT_TCGAAGCT	11	tailbud - PSM	ZF_Presomitic mesoderm	8
DEW047_AATGCGGAT_ACTGCCGT	2	neural plate - anterior	ZF_Neuroectoderm	8
DEW047_AGCAACCTG_CCACATTA	11	mesoderm - adaxial cells	ZF_Presomitic mesoderm	8
DEW047_GAGGGAGGTA_AGTTTAGA	14	neural plate - anterior	ZF_Neuroectoderm	8
DEW047_TGACACAAGGC_TCCCTGAT	14	tailbud - spinal cord	ZF_Tailbud	8
DEW047_AACTGAGTT_TAAATAGG	14	epidermal	ZF_Non-neural ectoderm	8
DEW047_GCTCTAGT_TCCCGTAG	2	neural plate - anterior	ZF_Neuroectoderm	8
DEW047_TGACGTAGAAG_CTTGGTGT	14	tailbud - spinal cord	ZF_Tailbud	8
DEW047_TGACCTGTTAT_CTACGAGC	22	tailbud - spinal cord	ZF_Tailbud	8
DEW047_TGAATGCATGG_ATGAAGCA	2	neural plate - anterior	ZF_Neuroectoderm	8
DEW047_GACTTACTCC_AGCTACGG	2	neural plate - anterior	ZF_Neuroectoderm	8
DEW047_TGACTCGCGTA_GATGTGAG	2	neural plate - anterior	ZF_Neuroectoderm	8
DEW047_AAGCTTCT_TTAAACTG	63	prechordal plate	ZF_Dorsal organizer	8
DEW047_TGACTTGGTGT_GGGAACGA	14	epidermal	ZF_Non-neural ectoderm	8
DEW047_GACGGGCTTT_CAGACCAT	11	tailbud - PSM	ZF_Presomitic mesoderm	8
DEW047_AAATGACCC_CTAGTAAC	14	tailbud - spinal cord	ZF_Tailbud	8
DEW047_AGGGTGTAT_CGGCACAT	14	tailbud - spinal cord	ZF_Tailbud	8
DEW047_TGAGACAAAGG_TTGCACGC	2	neural plate - anterior	ZF_Neuroectoderm	8
DEW047_GACTTACTCC_CTCCGCAT	2	neural plate - anterior	ZF_Neuroectoderm	8
DEW047_TACCGGCA_TTAGTCCG	14	tailbud - spinal cord	ZF_Tailbud	8
DEW047_GACTAGACCC_ATATCTTC	2	tailbud - spinal cord	ZF_Tailbud	8
DEW047_GAATTCCTTG_CTTACTCC	14	apoptotic-like	ZF_Apoptotic-like	8
DEW047_TGCCTCAC_ATCCGCTA	14	neural plate - anterior	ZF_Neuroectoderm	8
DEW047_GATCGTTT_AATGACCC	65	endoderm	ZF_Endoderm	8
DEW047_GACACGGACT_CTTTCTTT	22	neural plate - posterior	ZF_Neuroectoderm	8
DEW047_TGATCGACGGT_CTGGTGCA	14	epidermal	ZF_Non-neural ectoderm	8
DEW047_TGAGCCACATC_GGCCCTTA	11	mesoderm - lateral plate	ZF_Intermediate mesoderm	8
DEW047_TGACTACCGTT_TATTGCCT	11	tailbud - PSM	ZF_Presomitic mesoderm	8
DEW047_TAGCTTAT_TTGTGACT	2	neural plate - anterior	ZF_Neuroectoderm	8
DEW047_TGATGTCTTTC_CCCAAGCA	2	neural plate - posterior	ZF_Neuroectoderm	8
DEW047_TGACCAGT_GTCAAAGA	2	neural plate - anterior	ZF_Neuroectoderm	8
DEW047_TGACACAACAG_AGCACCAC	63	prechordal plate	ZF_Dorsal organizer	8
DEW047_GATACAAACT_CTTAGGTA	2	neural plate - anterior	ZF_Neuroectoderm	8
DEW047_AGGTTAGTG_GCCTCTTT	22	tailbud - spinal cord	ZF_Tailbud	8
DEW047_CTTTAATC_ACCCACGA	2	tailbud - spinal cord	ZF_Tailbud	8
DEW047_TGATGTTTGAG_TCGGTACG	14	epidermal	ZF_Non-neural ectoderm	8
DEW047_AATATACCT_TGACCCTC	65	endoderm	ZF_Endoderm	8
DEW047_TGAGGTCTGAC_TGTTCCAG	2	neural plate - anterior	ZF_Neuroectoderm	8
DEW047_GAATTCCTTG_GTTGTCAT	22	tailbud - spinal cord	ZF_Tailbud	8
DEW047_GAGGCGTTAG_CTGTTCTT	2	neural plate - posterior	ZF_Neuroectoderm	8
DEW047_GACGGGCTTT_GTCTCTCT	11	tailbud - PSM	ZF_Presomitic mesoderm	8
DEW047_AAAAGCCTA_ACTCACCG	2	neural plate - posterior	ZF_Neuroectoderm	8
DEW047_ACACTCCTC_TAGTCGCA	22	tailbud - spinal cord	ZF_Tailbud	8
DEW047_TGAGTGGAGCT_ACCCACGA	81	germline	ZF_Germline	8
DEW047_TGATTGTTTAC_TTGTGACT	22	tailbud - spinal cord	ZF_Tailbud	8
DEW047_AGGTTAGTG_GCGCATTC	2	neural plate - anterior	ZF_Neuroectoderm	8
DEW047_GACCCTTCAG_GCAGGGTA	2	neural plate - anterior	ZF_Neuroectoderm	8
DEW047_GAGGGAGGTA_AGTGATGC	2	neural plate - posterior	ZF_Neuroectoderm	8
DEW047_TGACGAGTCTG_AGGCAGTT	22	tailbud - spinal cord	ZF_Tailbud	8
DEW047_GAGATTGCGA_GGGCCAAT	22	tailbud - spinal cord	ZF_Tailbud	8
DEW047_CTATAGAG_CTACCGTT	22	tailbud - spinal cord	ZF_Tailbud	8
DEW047_ACAGGTGTC_TGACCAGT	2	neural plate - anterior	ZF_Neuroectoderm	8
DEW047_TGAGGCGGTTT_ACTCACCG	11	tailbud - PSM	ZF_Presomitic mesoderm	8
DEW047_TGATGTGGCTA_GATCGTTT	2	neural plate - anterior	ZF_Neuroectoderm	8
DEW047_AAAAGCCTA_TTTGTGTC	11	mesoderm - lateral plate	ZF_Intermediate mesoderm	8
DEW047_TGATCGACACC_ATCCGCTA	2	neural plate - anterior	ZF_Neuroectoderm	8
DEW047_ACGTATAC_CGTATTTC	11	mesoderm - adaxial cells	ZF_Presomitic mesoderm	8
DEW047_TGAGTGGAGCT_ATTGGGCC	11	tailbud - PSM	ZF_Presomitic mesoderm	8
DEW047_TAACTACT_CCAGCAGT	2	neural plate - anterior	ZF_Neuroectoderm	8
DEW047_TGAAGGAGCTT_GGCATGCT	2	neural plate - anterior	ZF_Neuroectoderm	8
DEW047_AGCACCAC_ACAGCGGA	14	epidermal	ZF_Non-neural ectoderm	8
DEW047_TGAATGACTTT_CCCTTGGT	2	neural plate - anterior	ZF_Neuroectoderm	8
DEW047_GCTCTAGT_GAATACGC	14	tailbud - spinal cord	ZF_Tailbud	8
DEW047_TGGCTACC_CTTCTGGA	14	epidermal	ZF_Non-neural ectoderm	8
DEW047_AAGCTACGG_GGGAAGGT	2	neural plate - posterior	ZF_Neuroectoderm	8
DEW047_GAGAGAGTAT_TTCGGCCT	2	apoptotic-like	ZF_Apoptotic-like	8
DEW047_TGACACTTTCT_TGTGGCTA	11	tailbud - PSM	ZF_Presomitic mesoderm	8
DEW047_TGAATGCATGG_AAATGTCG	11	tailbud - PSM	ZF_Presomitic mesoderm	8
DEW047_GAGCGGTA_GGAATAGA	22	tailbud - spinal cord	ZF_Tailbud	8
DEW047_TGACTTCTGGA_ATCCCACG	14	epidermal	ZF_Non-neural ectoderm	8
DEW047_TCGAAGCT_TCTCACTT	11	tailbud - spinal cord	ZF_Tailbud	8
DEW047_AATGGATTA_AGGAGCTT	22	neural plate - posterior	ZF_Neuroectoderm	8
DEW047_CCGCTGTT_GCGTTGCT	65	endoderm	ZF_Endoderm	8
DEW047_AAATCAGA_CCTCGTCT	63	prechordal plate	ZF_Dorsal organizer	8
DEW047_TGACCAGCAGT_TTTATCAC	14	epidermal	ZF_Non-neural ectoderm	8
DEW047_GATAACCATC_AAACTGGT	2	neural plate - posterior	ZF_Neuroectoderm	8
DEW047_AGCCTCTTT_CGTATCGG	2	neural plate - anterior	ZF_Neuroectoderm	8
DEW047_TGATTCACATA_AGCGCGAT	14	tailbud - spinal cord	ZF_Tailbud	8
DEW047_TGATTAGTCCG_AGCGAAGT	2	neural plate - anterior	ZF_Neuroectoderm	8
DEW047_GAATGGGCAC_AGATGGCT	22	tailbud - spinal cord	ZF_Tailbud	8
DEW047_ACCCTAACC_AGAACGGG	2	neural plate - anterior	ZF_Neuroectoderm	8
DEW047_TGACAACAAAT_ACCACGCT	22	tailbud - spinal cord	ZF_Tailbud	8
DEW047_ACCTTCTT_TGCCATCG	22	neural plate - posterior	ZF_Neuroectoderm	8
DEW047_GGATAAAG_GCCACATC	63	prechordal plate	ZF_Dorsal organizer	8
DEW047_TCATCCTT_GGCATGCT	11	mesoderm - lateral plate	ZF_Intermediate mesoderm	8
DEW047_GAGAAGGCTT_CAAGAGGG	14	epidermal	ZF_Non-neural ectoderm	8
DEW047_ATATGCAT_ACGCCATT	14	tailbud - spinal cord	ZF_Tailbud	8
DEW047_GAATTCCTTG_CATCGCAG	2	neural plate - anterior	ZF_Neuroectoderm	8
DEW047_GTTGCACG_GACGATGG	2	neural plate - anterior	ZF_Neuroectoderm	8
DEW047_AGAACGATT_CTGTTCTT	2	neural plate - anterior	ZF_Neuroectoderm	8
DEW047_TGAGCGCATTC_CGCCTTGA	2	tailbud - spinal cord	ZF_Tailbud	8
DEW047_CTTCGATT_CTTCGCAC	14	epidermal	ZF_Non-neural ectoderm	8
DEW047_TGACTTGGTGT_TTGTCGCC	22	tailbud - spinal cord	ZF_Tailbud	8
DEW047_ACCCACGA_CTGCGTTG	63	notocord	ZF_Notochord	8
DEW047_TGATGCCC_CAGGTGTC	2	neural plate - anterior	ZF_Neuroectoderm	8
DEW047_GAATTCCTTG_CTTTAATC	11	tailbud - PSM	ZF_Presomitic mesoderm	8
DEW047_AGTGGATGG_GCGTTGCT	22	tailbud - spinal cord	ZF_Tailbud	8
DEW047_GATAGTGTTT_CGGGCTTT	14	epidermal	ZF_Non-neural ectoderm	8
DEW047_GACAATTAGT_CTTCTTCG	63	notocord	ZF_Notochord	8
DEW047_AGGTCACAG_TTGGATCG	14	tailbud - spinal cord	ZF_Tailbud	8
DEW047_ACCCACGA_TCGGTACG	74	neural plate - anterior	ZF_Neuroectoderm	8
DEW047_TGACGTAGAAG_TCGACACC	11	tailbud - PSM	ZF_Presomitic mesoderm	8
DEW047_ATCACGTTT_GAGCCCAT	11	mesoderm - lateral plate	ZF_Intermediate mesoderm	8
DEW047_TGAGGTTTCTC_GCCGGATT	11	mesoderm - lateral plate	ZF_Intermediate mesoderm	8
DEW047_GAGGGAGGTA_AATCGGGT	2	apoptotic-like	ZF_Apoptotic-like	8
DEW047_AAAGGTAAT_GTCTCTCT	11	apoptotic-like 2	ZF_Apoptotic-like 2	8
DEW047_TGAGCCACATC_TTGGCGTT	63	prechordal plate	ZF_Dorsal organizer	8
DEW047_TGACTCGCGTA_GATTTACC	2	neural plate - anterior	ZF_Neuroectoderm	8
DEW047_CGAACGTA_TCGACACC	2	neural plate - anterior	ZF_Neuroectoderm	8
DEW047_TGACCTCGTCT_GGTTTCTC	14	epidermal	ZF_Non-neural ectoderm	8
DEW047_GATCCGTCCA_GATTTACC	22	tailbud - spinal cord	ZF_Tailbud	8
DEW047_ATCCGCTA_ATACTCTT	2	neural plate - anterior	ZF_Neuroectoderm	8
DEW047_TAGCTTAT_GCCAAGAT	22	tailbud - spinal cord	ZF_Tailbud	8
DEW047_ACGTATAC_GTTACGAT	2	neural plate - anterior	ZF_Neuroectoderm	8
DEW047_GATCTCACTT_TGACCCTC	22	tailbud - spinal cord	ZF_Tailbud	8
DEW047_TTGCATAT_ACGAAACG	14	epidermal	ZF_Non-neural ectoderm	8
DEW047_ATGTGTCCT_ATGGATTA	14	epidermal	ZF_Non-neural ectoderm	8
DEW047_ACAGATTAC_TAAATAGG	2	neural plate - anterior	ZF_Neuroectoderm	8
DEW047_TCCAGGGA_ATACTCTT	2	neural plate - anterior	ZF_Neuroectoderm	8
DEW047_ATTAGGACC_TGCGTATC	22	tailbud - spinal cord	ZF_Tailbud	8
DEW047_GAGGTCCCTT_ACCTTCTT	14	epidermal	ZF_Non-neural ectoderm	8
DEW047_GACACGGACT_CGTATTTC	74	neural plate - anterior	ZF_Neuroectoderm	8
DEW047_ACTGCGTTG_GTATGAGT	22	neural plate - posterior	ZF_Neuroectoderm	8
DEW047_TGAAGGAGCTT_GTTACGAT	14	epidermal	ZF_Non-neural ectoderm	8
DEW047_GGAGAAGC_CGGACAAC	11	mesoderm - lateral plate	ZF_Intermediate mesoderm	8
DEW047_CTTTCTTT_ATATGCAT	11	tailbud - PSM	ZF_Presomitic mesoderm	8
DEW047_GAACCACGCT_CCCATAGC	2	neural plate - anterior	ZF_Neuroectoderm	8
DEW047_GAGACAGATA_TCCAGTCC	14	epidermal	ZF_Non-neural ectoderm	8
DEW047_TGAATGACTTT_GCACCTCT	65	endoderm	ZF_Endoderm	8
DEW047_TGAAACAATCC_AGGTTGTG	22	neural plate - posterior	ZF_Neuroectoderm	8
DEW047_TGAATACCCAG_ATGACTTT	14	epidermal	ZF_Non-neural ectoderm	8
DEW047_AAGATGGCT_CAGTTTGC	14	epidermal	ZF_Non-neural ectoderm	8
DEW047_TGATCCCGTAG_GAAGTGCC	11	tailbud - PSM	ZF_Presomitic mesoderm	8
DEW047_AATGGATTA_TGGCTACC	2	neural plate - anterior	ZF_Neuroectoderm	8
DEW047_TGACGGGTAGT_ATCCGCTA	11	tailbud - PSM	ZF_Presomitic mesoderm	8
DEW047_TGCTATTT_GACAACTT	11	tailbud - PSM	ZF_Presomitic mesoderm	8
DEW047_GACAGTCCCT_ATTGGGCC	11	mesoderm - lateral plate	ZF_Intermediate mesoderm	8
DEW047_AGCAGAAC_CGTGCTAG	2	neural plate - anterior	ZF_Neuroectoderm	8
DEW047_GCTTACCT_GTTTACGT	22	neural plate - posterior	ZF_Neuroectoderm	8
DEW047_TGAATATAGGA_ACTGAGTT	11	mesoderm - lateral plate	ZF_Intermediate mesoderm	8
DEW047_GAATTGGGCC_GTTGTCAT	11	mesoderm - lateral plate	ZF_Intermediate mesoderm	8
DEW047_AAAACTCGA_AAATGTCG	11	mesoderm - lateral plate	ZF_Intermediate mesoderm	8
DEW047_TGGCTACC_GTTAACCA	11	mesoderm - lateral plate	ZF_Intermediate mesoderm	8
DEW047_TGACGTAGAAG_CTTCGATT	11	tailbud - PSM	ZF_Presomitic mesoderm	8
DEW047_TTCCGCTC_AACAATCC	2	neural plate - anterior	ZF_Neuroectoderm	8
DEW047_GATTTAACAG_CCGCTGTT	2	neural plate - anterior	ZF_Neuroectoderm	8
DEW047_GATACCAGGC_ACGTATAC	22	tailbud - spinal cord	ZF_Tailbud	8
DEW047_GAAGGCAGTT_CGGGCTTT	14	tailbud - spinal cord	ZF_Tailbud	8
DEW047_GACGGGCTTT_GAATTCGT	14	epidermal	ZF_Non-neural ectoderm	8
DEW047_AGAGGTGG_ATGTTGGC	65	endoderm	ZF_Endoderm	8
DEW047_TGAAGCGTAGG_GATCGTTT	22	tailbud - spinal cord	ZF_Tailbud	8
DEW047_AGAACGATT_ACCCACGA	2	apoptotic-like	ZF_Apoptotic-like	8
DEW047_TGACTTCGCAC_CTACTTGT	22	tailbud - spinal cord	ZF_Tailbud	8
DEW047_TGACTCAGAAT_ATTTCCGG	11	tailbud - PSM	ZF_Presomitic mesoderm	8
DEW047_GTTCAACT_CCAACCGT	11	tailbud - PSM	ZF_Presomitic mesoderm	8
DEW047_TGAGTGGAGCT_ATATCTTC	14	epidermal	ZF_Non-neural ectoderm	8
DEW047_GATAACCATC_TAGTCGCA	2	neural plate - anterior	ZF_Neuroectoderm	8
DEW047_GAGACAGATA_GATCGTTT	2	neural plate - anterior	ZF_Neuroectoderm	8
DEW047_AAAACCTCC_CTCAGAAT	22	tailbud - spinal cord	ZF_Tailbud	8
DEW047_TGACTTCTGGA_GATCGTTT	22	tailbud - spinal cord	ZF_Tailbud	8
DEW047_AGTTACCGC_CACGGACT	2	neural plate - anterior	ZF_Neuroectoderm	8
DEW047_AAGAACGGG_CAAGAGGG	2	neural plate - anterior	ZF_Neuroectoderm	8
DEW047_ACCCTAACC_CGGCTTAC	11	tailbud - PSM	ZF_Presomitic mesoderm	8
DEW047_ACGTGCTAG_CTGCGTTG	2	neural plate - anterior	ZF_Neuroectoderm	8
DEW047_AGCACCAC_TTCGGCCT	11	mesoderm - adaxial cells	ZF_Presomitic mesoderm	8
DEW047_AGTCAAAGA_CCTGTTAT	22	tailbud - spinal cord	ZF_Tailbud	8
DEW047_TGATTTACCCT_GGAGAAGC	65	endoderm	ZF_Endoderm	8
DEW047_AGGTGACAC_GCAAGGAC	2	neural plate - posterior	ZF_Neuroectoderm	8
DEW047_TGATAGAAATG_AAGGTAAT	11	tailbud - PSM	ZF_Presomitic mesoderm	8
DEW047_TGAACTAGCCA_CGAACGTA	11	mesoderm - lateral plate	ZF_Intermediate mesoderm	8
DEW047_TGAAAACAGGG_CTTCGCAC	81	germline	ZF_Germline	8
DEW047_GACATCTCCC_AGGAAGAC	63	mesoderm - lateral plate	ZF_Intermediate mesoderm	8
DEW047_GGAAACAG_GTATGAGT	22	neural plate - posterior	ZF_Neuroectoderm	8
DEW047_AGGTCACAG_AGAGGTGG	2	neural plate - anterior	ZF_Neuroectoderm	8
DEW047_TGACACAACAG_GTTTACGT	2	neural plate - anterior	ZF_Neuroectoderm	8
DEW047_CTTTAATC_CAGTTTGC	2	neural plate - anterior	ZF_Neuroectoderm	8
DEW047_AAGCGCCTT_CTTCTTCG	63	notocord	ZF_Notochord	8
DEW047_GAATGGAAAT_GTCTCTCT	2	neural plate - anterior	ZF_Neuroectoderm	8
DEW047_GATTCCGAGT_CCCATCTG	14	tailbud - spinal cord	ZF_Tailbud	8
DEW047_ATTCGTTCC_GGTTAGTG	2	neural plate - anterior	ZF_Neuroectoderm	8
DEW047_GAGGCGTTAG_GTCTCTCT	22	neural plate - posterior	ZF_Neuroectoderm	8
DEW047_TGAGGTCTGAC_GCGCATTC	22	neural plate - posterior	ZF_Neuroectoderm	8
DEW047_AATATCTTC_CTTCGATT	11	apoptotic-like 2	ZF_Apoptotic-like 2	8
DEW047_TGACTCGATGC_ATGGATTA	2	neural plate - anterior	ZF_Neuroectoderm	8
DEW047_TGAGGTTTCTC_GTTGTCAT	11	tailbud - PSM	ZF_Presomitic mesoderm	8
DEW047_ACCTTCTT_GGTCACAG	22	neural plate - posterior	ZF_Neuroectoderm	8
DEW047_AGCAAAGCC_GCAGGGTA	14	epidermal	ZF_Non-neural ectoderm	8
DEW047_TGACTACGAGC_ACCTTGCC	22	tailbud - spinal cord	ZF_Tailbud	8
DEW047_AAGCTACGG_GGCTACTA	11	tailbud - PSM	ZF_Presomitic mesoderm	8
DEW047_GACGAGATGT_AATGAATG	2	neural plate - posterior	ZF_Neuroectoderm	8
DEW047_ACCGCAACT_AAACCTCC	22	neural plate - posterior	ZF_Neuroectoderm	8
DEW047_TGAGTACACTC_ATACTCTT	2	neural plate - anterior	ZF_Neuroectoderm	8
DEW047_AATTCAGTA_ATGGGCAC	2	tailbud - spinal cord	ZF_Tailbud	8
DEW047_TGATGTCTTTC_TCCTTATT	2	neural plate - anterior	ZF_Neuroectoderm	8
DEW047_GACCCGAATG_TGTTCCAG	65	endoderm	ZF_Endoderm	8
DEW047_GCTTTGGC_TGACGGAC	2	neural plate - anterior	ZF_Neuroectoderm	8
DEW047_TGAGAGTTCAC_ACATCTAT	2	neural plate - anterior	ZF_Neuroectoderm	8
DEW047_TGACTTCGCAC_CTATAGAG	14	epidermal	ZF_Non-neural ectoderm	8
DEW047_GACAGTCCCT_GAATTCGT	11	mesoderm - lateral plate	ZF_Intermediate mesoderm	8
DEW047_TGAATTCGACG_CTAGTAAC	4	tailbud - spinal cord	ZF_Tailbud	8
DEW047_GAACGCCATT_GCAGCATG	2	apoptotic-like	ZF_Apoptotic-like	8
DEW047_TGAGTTCTGTT_CTTCTTCG	65	endoderm	ZF_Endoderm	8
DEW047_GATCTCAACC_CACGGACT	11	tailbud - PSM	ZF_Presomitic mesoderm	8
DEW047_GAAGTGATGC_TCTGCATC	14	epidermal	ZF_Non-neural ectoderm	8
DEW047_ACCCTAACC_GTCCATGT	11	mesoderm - lateral plate	ZF_Intermediate mesoderm	8
DEW047_AGAGACTA_CCTCGTCT	14	epidermal	ZF_Non-neural ectoderm	8
DEW047_GAGGGAACCT_CTTAGGTA	14	epidermal	ZF_Non-neural ectoderm	8
DEW047_GGAGAAGC_CGTATCGG	11	tailbud - PSM	ZF_Presomitic mesoderm	8
DEW047_TGAGCAGGGTA_GTTTGTTT	65	endoderm	ZF_Endoderm	8
DEW047_GAGGGAGGTA_TCGAAGCT	22	tailbud - spinal cord	ZF_Tailbud	8
DEW047_ACCCGACTT_ATCTTTGT	11	tailbud - PSM	ZF_Presomitic mesoderm	8
DEW047_TGACTGTTCTT_TCCCGTAG	22	tailbud - spinal cord	ZF_Tailbud	8
DEW047_TGACTCGATGC_ACCTTGCC	22	apoptotic-like	ZF_Apoptotic-like	8
DEW047_TGAGAGTTCAC_AAGCGTAC	11	mesoderm - adaxial cells	ZF_Presomitic mesoderm	8
DEW047_GCTCTAGT_CTTGGTGT	11	tailbud - PSM	ZF_Presomitic mesoderm	8
DEW047_GAATTCCTTG_TAAATAGG	11	tailbud - spinal cord	ZF_Tailbud	8
DEW047_AGAAGTCC_GAATACGC	14	epidermal	ZF_Non-neural ectoderm	8
DEW047_GGTGGGAT_CGTGCTAG	22	apoptotic-like	ZF_Apoptotic-like	8
DEW047_ATATGCAT_TTGCACGC	22	apoptotic-like	ZF_Apoptotic-like	8
DEW047_CCAACCGT_TTGATTCT	11	tailbud - PSM	ZF_Presomitic mesoderm	8
DEW047_ATCAGCGC_CTGGTGCA	11	mesoderm - lateral plate	ZF_Intermediate mesoderm	8
DEW047_AGAGACTA_ATATAGGA	2	neural plate - anterior	ZF_Neuroectoderm	8
DEW047_CTTACGGG_GGCTACTA	63	prechordal plate	ZF_Dorsal organizer	8
DEW047_GACAATTAGT_AGATGGCT	14	epidermal	ZF_Non-neural ectoderm	8
DEW047_TCCTTATT_CCCATAGC	11	mesoderm - lateral plate	ZF_Intermediate mesoderm	8
DEW047_GAGAAGGCTT_AGCGAAGT	22	tailbud - spinal cord	ZF_Tailbud	8
DEW047_TGAAGCGCGAT_ACCCACGA	65	endoderm	ZF_Endoderm	8
DEW047_TGATCGACACC_GCCAAGAT	14	tailbud - spinal cord	ZF_Tailbud	8
DEW047_GAACGCCATT_TTGCATAT	22	tailbud - spinal cord	ZF_Tailbud	8
DEW047_AAGTGAAAG_TCACGTTT	22	tailbud - spinal cord	ZF_Tailbud	8
DEW047_TGATCCCTGAT_GAGAGTAT	22	tailbud - spinal cord	ZF_Tailbud	8
DEW047_GTAACGTT_CGGGTAGT	14	tailbud - spinal cord	ZF_Tailbud	8
DEW047_GGCATGCT_TGAGGTCT	11	tailbud - PSM	ZF_Presomitic mesoderm	8
DEW047_TGATCCCTGAT_GGAAACAG	2	neural plate - anterior	ZF_Neuroectoderm	8
DEW047_GACGAGATGT_TACCGGCA	65	endoderm	ZF_Endoderm	8
DEW047_GGAAACAG_ATCAGCGC	2	neural plate - posterior	ZF_Neuroectoderm	8
DEW047_ATGTGTCCT_GGGAAGGT	11	tailbud - PSM	ZF_Presomitic mesoderm	8
DEW047_TGAGTTCTGTT_CTACTTGT	14	epidermal	ZF_Non-neural ectoderm	8
DEW047_GTAACGTT_GTCCATGT	63	prechordal plate	ZF_Dorsal organizer	8
DEW047_GGTGGGAT_GAGCGGTA	14	tailbud - spinal cord	ZF_Tailbud	8
DEW047_ATCAGCGC_CTCGATGC	14	tailbud - spinal cord	ZF_Tailbud	8
DEW047_TGAGGCTACTA_GTTCTGTT	11	tailbud - PSM	ZF_Presomitic mesoderm	8
DEW047_ACACTCCTC_CGCTAGTC	11	tailbud - PSM	ZF_Presomitic mesoderm	8
DEW047_TGACATACATT_AATTCCCA	14	tailbud - spinal cord	ZF_Tailbud	8
DEW047_GACATCTCCC_CCCGAATG	2	neural plate - anterior	ZF_Neuroectoderm	8
DEW047_TGACTACCGTT_TGGGATTC	22	neural plate - posterior	ZF_Neuroectoderm	8
DEW047_CCCATCTG_GTCAAAGA	63	prechordal plate	ZF_Dorsal organizer	8
DEW047_GCAGCATG_TCCAGGGA	2	neural plate - posterior	ZF_Neuroectoderm	8
DEW047_ATAGTGGAC_AGGAGCTT	11	tailbud - PSM	ZF_Presomitic mesoderm	8
DEW047_ATTTGGGAG_GGGAAGGT	63	notocord	ZF_Notochord	8
DEW047_TGATATTGCCT_TTGATTCT	22	neural plate - posterior	ZF_Neuroectoderm	8
DEW047_TGAATGACTTT_CACAGTTT	22	tailbud - spinal cord	ZF_Tailbud	8
DEW047_AAAATCGTT_CAAGAGGG	14	epidermal	ZF_Non-neural ectoderm	8
DEW047_TGATGATAACA_CAATACTT	22	tailbud - spinal cord	ZF_Tailbud	8
DEW047_GATCGGTACG_TGTAAAGG	14	epidermal	ZF_Non-neural ectoderm	8
DEW047_AGAGGTGG_AGCGCCTT	11	mesoderm - lateral plate	ZF_Intermediate mesoderm	8
DEW047_TGACCTCGTCT_TGGGATTC	2	neural plate - posterior	ZF_Neuroectoderm	8
DEW047_GACGATTGAT_TGTGCTCA	63	prechordal plate	ZF_Dorsal organizer	8
DEW047_AGAGGTGG_ACCACGCT	14	tailbud - spinal cord	ZF_Tailbud	8
DEW047_TTATAGCC_GGCCTAAG	22	tailbud - spinal cord	ZF_Tailbud	8
DEW047_GACCCGAATG_CAGATTAC	2	neural plate - anterior	ZF_Neuroectoderm	8
DEW047_AATGTTGGC_CTTCAGGT	65	endoderm	ZF_Endoderm	8
DEW047_GACCCGAATG_CATACATT	11	tailbud - PSM	ZF_Presomitic mesoderm	8
DEW047_GATCTCAACC_AACTTAGC	2	neural plate - anterior	ZF_Neuroectoderm	8
DEW047_GACCCATAGC_TCCCTGAT	65	forerunner cells	ZF_Forerunner cells	8
DEW047_GTACCTTG_TGGTTTCT	2	neural plate - anterior	ZF_Neuroectoderm	8
DEW047_GTACCTTG_GGCCTAAG	2	neural plate - anterior	ZF_Neuroectoderm	8
DEW047_GATGACGGAC_AATGACCC	22	neural plate - posterior	ZF_Neuroectoderm	8
DEW047_GCAGCATG_GTTTGTTT	22	tailbud - spinal cord	ZF_Tailbud	8
DEW047_ACGTGGATA_GCACCTCT	11	mesoderm - lateral plate	ZF_Intermediate mesoderm	8
DEW047_TGACTTCTGGA_CGAGTCTG	2	neural plate - anterior	ZF_Neuroectoderm	8
DEW047_CGAACGTA_CCATTACT	22	tailbud - spinal cord	ZF_Tailbud	8
DEW047_ACGTGCTAG_TGGTATGA	22	neural plate - posterior	ZF_Neuroectoderm	8
DEW047_ATAGTCGCA_GGCGTTAG	63	prechordal plate	ZF_Dorsal organizer	8
DEW047_TGATCGACGGT_TAGTCGCA	11	tailbud - PSM	ZF_Presomitic mesoderm	8
DEW047_TGATGTCTTTC_CTTCTGGA	11	tailbud - PSM	ZF_Presomitic mesoderm	8
DEW047_GACAATTAGT_TTTATCAC	11	mesoderm - lateral plate	ZF_Intermediate mesoderm	8
DEW047_GAAGGCAGTT_TTTAACAG	22	tailbud - spinal cord	ZF_Tailbud	8
DEW047_GAGGGAACCT_TTGATTCT	22	tailbud - spinal cord	ZF_Tailbud	8
DEW047_AATTCCCA_TTTAACAG	11	mesoderm - lateral plate	ZF_Intermediate mesoderm	8
DEW047_GACGACTCCT_TTTACCCT	2	neural plate - anterior	ZF_Neuroectoderm	8
DEW047_GAATGGGCAC_AGCTACGG	14	tailbud - spinal cord	ZF_Tailbud	8
DEW047_GCATGGGT_TAGCCTCG	63	neural plate - anterior	ZF_Neuroectoderm	8
DEW047_TACCGGCA_ATATACCT	14	epidermal	ZF_Non-neural ectoderm	8
DEW047_TTATCTGT_CCGCTGTT	2	neural plate - anterior	ZF_Neuroectoderm	8
DEW047_GAAGGAAGAC_ACGCAGAG	14	apoptotic-like	ZF_Apoptotic-like	8
DEW047_ATGGCCTGT_GTGGAGCT	14	epidermal	ZF_Non-neural ectoderm	8
DEW047_CTTCAGGT_GTTCTGTT	2	neural plate - anterior	ZF_Neuroectoderm	8
DEW047_GTTGCACG_TACTTGTG	2	neural plate - anterior	ZF_Neuroectoderm	8
DEW047_ATCTGCATC_TTGTGACT	22	neural plate - posterior	ZF_Neuroectoderm	8
DEW047_TGAACTAGCCA_CTTACTCC	11	tailbud - PSM	ZF_Presomitic mesoderm	8
DEW047_TGACTGGTGCA_TCTAGCAG	14	epidermal	ZF_Non-neural ectoderm	8
DEW047_TGATAACCCGT_CGAGTCTG	14	neural plate - anterior	ZF_Neuroectoderm	8
DEW047_GACATTTGTT_TCACCGAG	11	mesoderm - lateral plate	ZF_Intermediate mesoderm	8
DEW047_GAGAAGGCTT_TTATAGCC	2	neural plate - anterior	ZF_Neuroectoderm	8
DEW047_ACTTAGGTA_AACACACG	11	tailbud - PSM	ZF_Presomitic mesoderm	8
DEW047_AACTGAGTT_CAAGTCAT	2	neural plate - anterior	ZF_Neuroectoderm	8
DEW047_GAATGGGCAC_ACTAGGAT	11	mesoderm - lateral plate	ZF_Intermediate mesoderm	8
DEW047_GCTTACCT_AAACCTCC	11	mesoderm - lateral plate	ZF_Intermediate mesoderm	8
DEW047_TGATGTCTTTC_AGCGAAGT	14	tailbud - spinal cord	ZF_Tailbud	8
DEW047_TGCCTCAC_CTAGACCC	14	epidermal	ZF_Non-neural ectoderm	8
DEW047_CAGTTTGC_GTCATATT	2	neural plate - anterior	ZF_Neuroectoderm	8
DEW047_CCCATCTG_AGGCAACG	22	tailbud - spinal cord	ZF_Tailbud	8
DEW047_ACCCGACTT_CGGGCTTT	2	apoptotic-like	ZF_Apoptotic-like	8
DEW047_TGAGGAATAGA_ATGTTGGC	65	endoderm	ZF_Endoderm	8
DEW047_GGAAACAG_AGACACCA	2	neural plate - anterior	ZF_Neuroectoderm	8
DEW047_ATGGCCTGT_CAGTCCCT	14	epidermal	ZF_Non-neural ectoderm	8
DEW047_AGGTCACAG_CTTGGTGT	11	tailbud - PSM	ZF_Presomitic mesoderm	8
DEW047_ACAGATTAC_CAGACCAT	22	tailbud - spinal cord	ZF_Tailbud	8
DEW047_TGAGAGTTCAC_ATCAGCGC	14	tailbud - spinal cord	ZF_Tailbud	8
DEW047_TGACCAGCAGT_GAACGATT	2	neural plate - anterior	ZF_Neuroectoderm	8
DEW047_AGCAGAAC_GGGTGTAT	2	neural plate - anterior	ZF_Neuroectoderm	8
DEW047_GACATCTCCC_GATCTCGG	11	mesoderm - lateral plate	ZF_Intermediate mesoderm	8
DEW047_TGATCGACACC_ATCAGCGC	2	neural plate - anterior	ZF_Neuroectoderm	8
DEW047_GAATGGGCAC_GCGTTGCT	2	neural plate - anterior	ZF_Neuroectoderm	8
DEW047_GATGTAAAGG_GCAGTCGA	14	tailbud - spinal cord	ZF_Tailbud	8
DEW047_GACCCTTCAG_CTAGATTG	14	epidermal	ZF_Non-neural ectoderm	8
DEW047_TGACAGACCAT_GGCGGTTT	22	neural plate - posterior	ZF_Neuroectoderm	8
DEW047_TGCCTCAC_GAATACGC	14	epidermal	ZF_Non-neural ectoderm	8
DEW047_TGACTTCTGGA_CACAGTTT	14	apoptotic-like	ZF_Apoptotic-like	8
DEW047_GACGTACCTA_CCGTGTTT	11	mesoderm - lateral plate	ZF_Intermediate mesoderm	8
DEW047_GGCATGCT_CGAACGTA	2	neural plate - anterior	ZF_Neuroectoderm	8
DEW047_TGACACAACAG_CCGCAACT	74	tailbud - spinal cord	ZF_Tailbud	8
DEW047_ACGCTCTCA_AGCGTAGG	2	neural plate - anterior	ZF_Neuroectoderm	8
DEW047_GATCTCAACC_GATTTACC	11	tailbud - PSM	ZF_Presomitic mesoderm	8
DEW047_ATCTAGCAG_CACAACAG	11	mesoderm - lateral plate	ZF_Intermediate mesoderm	8
DEW047_GACATCTCCC_AATGTTTG	2	tailbud - spinal cord	ZF_Tailbud	8
DEW047_TGAAGAAGTTA_TGTACACG	63	prechordal plate	ZF_Dorsal organizer	8
DEW047_ATCTGCATC_TCCCGTAG	2	neural plate - posterior	ZF_Neuroectoderm	8
DEW047_CGACGTCA_TCTCACTT	11	mesoderm - lateral plate	ZF_Intermediate mesoderm	8
DEW047_GAAGTGATGC_GGTGGGAT	2	neural plate - anterior	ZF_Neuroectoderm	8
DEW047_CATCGCAG_TGTCTTTC	63	notocord	ZF_Notochord	8
DEW047_TGATCCCGTAG_CTTTAATC	65	endoderm	ZF_Endoderm	8
DEW047_GATTCCGAGT_CCATTTGA	14	epidermal	ZF_Non-neural ectoderm	8
DEW047_TGGTATGA_GTTCTGTT	14	neural plate - anterior	ZF_Neuroectoderm	8
DEW047_GACAAGAGGG_ACCTTCTT	65	endoderm	ZF_Endoderm	8
DEW047_AAGCTATGA_GTATGAGT	22	tailbud - spinal cord	ZF_Tailbud	8
DEW047_GACGTCAGCA_ACGCTCAG	11	tailbud - PSM	ZF_Presomitic mesoderm	8
DEW047_AAATGACCC_TGCTATTT	2	neural plate - anterior	ZF_Neuroectoderm	8
DEW047_GATCTCAACC_ACTGAGTT	11	tailbud - spinal cord	ZF_Tailbud	8
DEW047_TGACCAGCAGT_CGGAATTT	22	apoptotic-like	ZF_Apoptotic-like	8
DEW047_TCATCCTT_CCCATCTG	14	neural plate - anterior	ZF_Neuroectoderm	8
DEW047_ATAGTCGCA_TTTAACAG	14	epidermal	ZF_Non-neural ectoderm	8
DEW047_AAGCGCCTT_GGGTTGGT	2	neural plate - anterior	ZF_Neuroectoderm	8
DEW047_TGATTGTTTAC_AACCTGAC	22	tailbud - spinal cord	ZF_Tailbud	8
DEW047_GACAATTAGT_GCACCTCT	22	tailbud - spinal cord	ZF_Tailbud	8
DEW047_TGATTCGCTGG_CAGGTGTC	65	endoderm	ZF_Endoderm	8
DEW047_AGAGACTA_ACAGCGGA	2	neural plate - anterior	ZF_Neuroectoderm	8
DEW047_GAAGGCAGTT_GGAGAAGC	63	prechordal plate	ZF_Dorsal organizer	8
DEW047_TGAACTAGCCA_CAACAAAT	2	neural plate - anterior	ZF_Neuroectoderm	8
DEW047_CGACGTCA_AATGTTTG	22	neural plate - posterior	ZF_Neuroectoderm	8
DEW047_AATCCCACG_CCTCGTCT	11	tailbud - PSM	ZF_Presomitic mesoderm	8
DEW047_CGCTAATA_TCGGTTCG	11	mesoderm - lateral plate	ZF_Intermediate mesoderm	8
DEW047_TGACACAACAG_TCGGTTTA	11	tailbud - PSM	ZF_Presomitic mesoderm	8
DEW047_TGAATGAAGCA_GTCTCTCT	11	mesoderm - lateral plate	ZF_Intermediate mesoderm	8
DEW047_GGCCCTTA_CTGGTGCA	11	tailbud - PSM	ZF_Presomitic mesoderm	8
DEW047_ATCAGCGC_GGATAAAG	14	epidermal	ZF_Non-neural ectoderm	8
DEW047_TGATTGCACGC_ATGCATGG	63	prechordal plate	ZF_Dorsal organizer	8
DEW047_CATCGCAG_AACAATCC	22	tailbud - spinal cord	ZF_Tailbud	8
DEW047_GACGTACCTA_AGGAGCTT	11	tailbud - PSM	ZF_Presomitic mesoderm	8
DEW047_TGGCTACC_GGCGTTAG	22	tailbud - spinal cord	ZF_Tailbud	8
DEW047_TGATCCCGTAG_CAGTCCCT	2	neural plate - posterior	ZF_Neuroectoderm	8
DEW047_TGAACGCTCAG_GGGAGGTA	14	epidermal	ZF_Non-neural ectoderm	8
DEW047_AGGGTGTAT_GTCATATT	2	neural plate - anterior	ZF_Neuroectoderm	8
DEW047_GACAATTAGT_GTTCTGTT	14	epidermal	ZF_Non-neural ectoderm	8
DEW047_TGACGGGTAGT_CCCATAGC	14	epidermal	ZF_Non-neural ectoderm	8
DEW047_GACCTGACAC_TAGTGGAC	14	tailbud - spinal cord	ZF_Tailbud	8
DEW047_AGTTTACGT_AGCAGAAC	11	tailbud - PSM	ZF_Presomitic mesoderm	8
DEW047_TGATTGTTTAC_GGGCCAAT	14	epidermal	ZF_Non-neural ectoderm	8
DEW047_ATCTAGCAG_CTGTCTGG	14	epidermal	ZF_Non-neural ectoderm	8
DEW047_GACCCATAGC_GGTGACAC	11	tailbud - spinal cord	ZF_Tailbud	8
DEW047_GATGTGCTCA_CCGCTGTT	14	tailbud - spinal cord	ZF_Tailbud	8
DEW047_GACCTATTCA_GTCATATT	2	neural plate - anterior	ZF_Neuroectoderm	8
DEW047_GATGACGGAC_ACCTTGCC	2	neural plate - anterior	ZF_Neuroectoderm	8
DEW047_ATCTAGCAG_AAGCTTCT	22	tailbud - spinal cord	ZF_Tailbud	8
DEW047_TGAGGCTACTA_CATCTCCC	2	neural plate - anterior	ZF_Neuroectoderm	8
DEW047_AGTTTACGT_ACCCACGA	11	tailbud - PSM	ZF_Presomitic mesoderm	8
DEW047_TGACCTCGTCT_ATATGCAT	2	neural plate - posterior	ZF_Neuroectoderm	8
DEW047_CTTCGATT_TGAGGTCT	63	mesoderm - lateral plate	ZF_Intermediate mesoderm	8
DEW047_CGAACGTA_TAAGACGG	2	neural plate - anterior	ZF_Neuroectoderm	8
DEW047_TGACTGTTCTT_CCCATCTG	14	epidermal	ZF_Non-neural ectoderm	8
DEW047_GAAGTGATGC_GCTCTAGT	65	endoderm	ZF_Endoderm	8
DEW047_TCCTTATT_CTGTCTGG	65	endoderm	ZF_Endoderm	8
DEW047_TGAAAACTGGT_GTAATCCC	14	epidermal	ZF_Non-neural ectoderm	8
DEW047_TGCAAGGG_TGCTATTT	2	neural plate - anterior	ZF_Neuroectoderm	8
DEW047_TGACTCGATGC_CTTCAGGT	65	endoderm	ZF_Endoderm	8
DEW047_ACAGATTAC_ATATGCAT	11	mesoderm - lateral plate	ZF_Intermediate mesoderm	8
DEW047_AAGCTATGA_AGTGATGC	14	apoptotic-like	ZF_Apoptotic-like	8
DEW047_AACGCAGAG_TCGTCATG	11	tailbud - spinal cord	ZF_Tailbud	8
DEW047_GTAACGTT_TGCGACAG	74	neural plate - anterior	ZF_Neuroectoderm	8
DEW047_GATCCCAATC_TCGGTACG	2	neural plate - anterior	ZF_Neuroectoderm	8
DEW047_TGATGCCC_CGTAGAAG	2	neural plate - anterior	ZF_Neuroectoderm	8
DEW047_TGAGGCTACTA_AACTTAGC	14	epidermal	ZF_Non-neural ectoderm	8
DEW047_CAGTTTGC_GCAGCATG	11	mesoderm - adaxial cells	ZF_Presomitic mesoderm	8
DEW047_GAGACAGATA_CGAGTCTG	22	tailbud - spinal cord	ZF_Tailbud	8
DEW047_AACCTGAC_AAATCAGA	11	mesoderm - adaxial cells	ZF_Presomitic mesoderm	8
DEW047_GTGTAACC_CTTAGGTA	22	tailbud - spinal cord	ZF_Tailbud	8
DEW047_GATTAAACTG_CTGGTGCA	2	neural plate - anterior	ZF_Neuroectoderm	8
DEW047_TCATATGG_CCTACTAG	2	neural plate - posterior	ZF_Neuroectoderm	8
DEW047_CTTTAATC_CGTCAGCA	2	neural plate - anterior	ZF_Neuroectoderm	8
DEW047_TGAATGACCGA_TGCAAGGG	14	epidermal	ZF_Non-neural ectoderm	8
DEW047_GAACGCCATT_ATGACTTT	11	tailbud - PSM	ZF_Presomitic mesoderm	8
DEW047_ACCCGACTT_TGCTATTT	2	neural plate - posterior	ZF_Neuroectoderm	8
DEW047_GGATAAAG_CCATTACT	22	neural plate - posterior	ZF_Neuroectoderm	8
DEW047_TTAAGCGT_TTAAACTG	2	neural plate - anterior	ZF_Neuroectoderm	8
DEW047_GATGTACACG_GATGTATT	14	epidermal	ZF_Non-neural ectoderm	8
DEW047_ACCCGACTT_AGCGCGAT	65	endoderm	ZF_Endoderm	8
DEW047_AAATCAGA_GAAGCACT	14	epidermal	ZF_Non-neural ectoderm	8
DEW047_AGTTTACGT_CCGTGTTT	22	neural plate - posterior	ZF_Neuroectoderm	8
DEW047_ATTTATCAC_TGGTTTCT	2	neural plate - anterior	ZF_Neuroectoderm	8
DEW047_AGAGACTA_CTTTAATC	2	apoptotic-like	ZF_Apoptotic-like	8
DEW047_TGGTATGA_CTTCTTCG	11	tailbud - PSM	ZF_Presomitic mesoderm	8
DEW047_GAGATTGCGA_GCCTCTTT	2	neural plate - anterior	ZF_Neuroectoderm	8
DEW047_GACGAATAAT_AATGACCC	2	neural plate - anterior	ZF_Neuroectoderm	8
DEW047_TGAACGCTCAG_CCCGAATG	11	tailbud - PSM	ZF_Presomitic mesoderm	8
DEW047_GATGTGAG_TTTAACAG	22	tailbud - spinal cord	ZF_Tailbud	8
DEW047_TGAGCCGGATT_CCATTACT	22	notocord	ZF_Notochord	8
DEW047_AGCCAAGAT_GAGCCCAT	11	mesoderm - adaxial cells	ZF_Presomitic mesoderm	8
DEW047_TGAGAGGCTGA_AGGCAGTT	2	neural plate - anterior	ZF_Neuroectoderm	8
DEW047_GAGATTGCGA_CTCCGCAT	14	tailbud - spinal cord	ZF_Tailbud	8
DEW047_ACAGGTGTC_ACCTTGCC	81	germline	ZF_Germline	8
DEW047_GAGTTGTCAT_CGTCAGCA	22	neural plate - anterior	ZF_Neuroectoderm	8
DEW047_TGATACGTGCT_ACCTTCTT	14	tailbud - spinal cord	ZF_Tailbud	8
DEW047_TGATCCCGTAG_GGTGGGAT	22	neural plate - posterior	ZF_Neuroectoderm	8
DEW047_ATCTTTGT_TGTAAAGG	2	tailbud - spinal cord	ZF_Tailbud	8
DEW047_ACTCCGCAT_AAATCGTT	22	tailbud - spinal cord	ZF_Tailbud	8
DEW047_AATGTTTG_TGCCATCG	14	tailbud - spinal cord	ZF_Tailbud	8
DEW047_AACGGTAGC_CTGCGTTG	2	neural plate - anterior	ZF_Neuroectoderm	8
DEW047_GACATTTGTT_AAGATTGT	2	neural plate - anterior	ZF_Neuroectoderm	8
DEW047_TGAGATTTACC_CAGATTAC	22	apoptotic-like	ZF_Apoptotic-like	8
DEW047_ATCAGCGC_CTTTAATC	63	notocord	ZF_Notochord	8
DEW047_GACATCTCCC_CTTCTTCG	2	neural plate - anterior	ZF_Neuroectoderm	8
DEW047_AACTTAGC_GATTTACC	22	apoptotic-like	ZF_Apoptotic-like	8
DEW047_ACGGACAAC_CTACGAGC	11	mesoderm - lateral plate	ZF_Intermediate mesoderm	8
DEW047_AACGGTAGC_AAATCGTT	14	apoptotic-like	ZF_Apoptotic-like	8
DEW047_TGAAGAAGTTA_ACGCAGAG	22	apoptotic-like	ZF_Apoptotic-like	8
DEW047_GACGTCAGCA_TTTGTGTC	22	neural plate - posterior	ZF_Neuroectoderm	8
DEW047_TGAGTAATCCC_CAATACTT	11	mesoderm - adaxial cells	ZF_Presomitic mesoderm	8
DEW047_AGGCAACG_TGACCAGT	65	endoderm	ZF_Endoderm	8
DEW047_GATGTTCCAG_ACGGTAGC	65	endoderm	ZF_Endoderm	8
DEW047_GACCTGACAC_CGGGTAGT	2	neural plate - anterior	ZF_Neuroectoderm	8
DEW047_AACTTAGC_GCATGGGT	2	neural plate - anterior	ZF_Neuroectoderm	8
DEW047_AGATGTATT_AGCTACGG	2	neural plate - anterior	ZF_Neuroectoderm	8
DEW047_GAAAGCGTAC_CTCGATGC	2	neural plate - anterior	ZF_Neuroectoderm	8
DEW047_AATATACCT_AGAAGTCC	14	tailbud - spinal cord	ZF_Tailbud	8
DEW047_TAGCTTAT_GGGAAGGT	14	epidermal	ZF_Non-neural ectoderm	8
DEW047_AACGGTAGC_GCCACATC	22	tailbud - spinal cord	ZF_Tailbud	8
DEW047_AGGTCACAG_TGATGCCC	11	tailbud - PSM	ZF_Presomitic mesoderm	8
DEW047_GACTAGACCC_TTGGACTT	11	tailbud - PSM	ZF_Presomitic mesoderm	8
DEW047_TGAACTAGCCA_GATCTCGG	14	tailbud - spinal cord	ZF_Tailbud	8
DEW047_CTTTCTTT_GTTAACCA	2	neural plate - anterior	ZF_Neuroectoderm	8
DEW047_GAGTTTCG_CTAGATTG	11	tailbud - PSM	ZF_Presomitic mesoderm	8
DEW047_ATGGCCTGT_TTCCGCTC	65	endoderm	ZF_Endoderm	8
DEW047_AAGCTTCT_GGTCACAG	22	tailbud - spinal cord	ZF_Tailbud	8
DEW047_TTCGGCCT_TGCCTCAC	2	neural plate - anterior	ZF_Neuroectoderm	8
DEW047_TGATAGAAATG_CGGCTTAC	11	mesoderm - adaxial cells	ZF_Presomitic mesoderm	8
DEW047_ACTACTTGT_TTGATCTA	22	neural plate - posterior	ZF_Neuroectoderm	8
DEW047_ATTTCCGG_ACGCAGAG	2	neural plate - anterior	ZF_Neuroectoderm	8
DEW047_TGCCTCAC_GATGTATT	22	neural plate - posterior	ZF_Neuroectoderm	8
DEW047_TGATTCACATA_CATCTCCC	11	tailbud - PSM	ZF_Presomitic mesoderm	8
DEW047_GATTGAGGGT_CGCTAGTC	11	tailbud - PSM	ZF_Presomitic mesoderm	8
DEW047_CCCAAGCA_CTTAGGTA	14	tailbud - spinal cord	ZF_Tailbud	8
DEW047_TGAATGACTTT_CTAGACCC	2	neural plate - anterior	ZF_Neuroectoderm	8
DEW047_TGAGGGAAATC_AGGTTGTG	2	neural plate - anterior	ZF_Neuroectoderm	8
DEW047_AAATGACCC_TGTCTTTC	11	tailbud - PSM	ZF_Presomitic mesoderm	8
DEW047_GAGGGAACCT_GAACGATT	2	neural plate - anterior	ZF_Neuroectoderm	8
DEW047_AACTTAGC_TTGATTCT	11	mesoderm - adaxial cells	ZF_Presomitic mesoderm	8
DEW047_TGACCAGT_CATTTGTT	14	epidermal	ZF_Non-neural ectoderm	8
DEW047_GATAACCATC_CGTATCGG	11	tailbud - PSM	ZF_Presomitic mesoderm	8
DEW047_ATATGCAT_TGATGCCC	2	neural plate - anterior	ZF_Neuroectoderm	8
DEW047_GATGTTCCAG_TGCAAGGG	22	tailbud - spinal cord	ZF_Tailbud	8
DEW047_TGAGTGGAGCT_AACAATCC	22	tailbud - spinal cord	ZF_Tailbud	8
DEW047_TGAAGAAGTTA_GATTGCGA	2	neural plate - anterior	ZF_Neuroectoderm	8
DEW047_TGATCGACACC_GCTTACCT	11	mesoderm - lateral plate	ZF_Intermediate mesoderm	8
DEW047_GATTGAGGGT_TTCCGCTC	11	tailbud - PSM	ZF_Presomitic mesoderm	8
DEW047_GGTGGGAT_TTGATTCT	2	neural plate - anterior	ZF_Neuroectoderm	8
DEW047_ATCAGCGC_ATCTTTGT	14	epidermal	ZF_Non-neural ectoderm	8
DEW047_GTTGCACG_GGGAGGTA	14	neural plate - anterior	ZF_Neuroectoderm	8
DEW047_GAGGGAGGTA_ACCTTCTT	65	endoderm	ZF_Endoderm	8
DEW047_GATGTGCTCA_ATGGAAAT	22	tailbud - spinal cord	ZF_Tailbud	8
DEW047_GAGAGAGTAT_CTCCGCAT	65	endoderm	ZF_Endoderm	8
DEW047_TGATACGTGCT_ATTCAGTA	2	neural plate - anterior	ZF_Neuroectoderm	8
DEW048_TGAGCCGGATT_AAATCGTT	22	tailbud - spinal cord	ZF_Tailbud	8
DEW048_TAGTCTAG_GGGTTGGT	2	neural plate - anterior	ZF_Neuroectoderm	8
DEW048_TTAAGCGT_CGGACAAC	14	neural plate - posterior	ZF_Neuroectoderm	8
DEW048_TGACGTATCGG_GTTGCACG	11	tailbud - PSM	ZF_Presomitic mesoderm	8
DEW048_GACTTCTTCG_TCTGCATC	2	neural plate - anterior	ZF_Neuroectoderm	8
DEW048_GATGACCCTC_TTGATTCT	65	notocord	ZF_Notochord	8
DEW048_ACCTTGCC_TTGCACGC	11	tailbud - spinal cord	ZF_Tailbud	8
DEW048_ATAGTCGCA_GGGCCAAT	2	neural plate - anterior	ZF_Neuroectoderm	8
DEW048_ATCCGCTA_AGACACCA	14	epidermal	ZF_Non-neural ectoderm	8
DEW048_GAGGGAACCT_ATCCCACG	14	epidermal	ZF_Non-neural ectoderm	8
DEW048_TGAATATAGGA_GTCATATT	2	neural plate - anterior	ZF_Neuroectoderm	8
DEW048_AGCACCTCT_ATGACTTT	11	tailbud - PSM	ZF_Presomitic mesoderm	8
DEW048_GATAAGACGG_CTTCGCAC	14	tailbud - spinal cord	ZF_Tailbud	8
DEW048_TGACTGTTCTT_GGGTGTAT	2	neural plate - anterior	ZF_Neuroectoderm	8
DEW048_TAGTCTAG_CAGTCCCT	11	mesoderm - lateral plate	ZF_Intermediate mesoderm	8
DEW048_CGAACGTA_TGCGTATC	14	epidermal	ZF_Non-neural ectoderm	8
DEW048_CTATAGAG_GATCGTTT	22	tailbud - spinal cord	ZF_Tailbud	8
DEW048_ACGTGGATA_CCCAAGCA	2	neural plate - anterior	ZF_Neuroectoderm	8
DEW048_GACCACATTA_TGAAATGA	63	prechordal plate	ZF_Dorsal organizer	8
DEW048_TGACTAGTAAC_GCCTCTTT	14	neural plate - anterior	ZF_Neuroectoderm	8
DEW048_AAATCGGGT_CTGGTGCA	14	epidermal	ZF_Non-neural ectoderm	8
DEW048_TCATCCTT_TTCCGAGT	11	mesoderm - lateral plate	ZF_Intermediate mesoderm	8
DEW048_CCCATCTG_CAGTTTGC	2	neural plate - posterior	ZF_Neuroectoderm	8
DEW048_GATCGGTTTA_GGCATGCT	22	tailbud - spinal cord	ZF_Tailbud	8
DEW048_AGCCAAGAT_AGATGGCT	65	endoderm	ZF_Endoderm	8
DEW048_GAGAGCCCAT_CTGTTCTT	2	neural plate - anterior	ZF_Neuroectoderm	8
DEW048_GAACTAGGAT_CATCGCAG	2	neural plate - anterior	ZF_Neuroectoderm	8
DEW048_ATTGTGACT_GTAACGTT	2	neural plate - anterior	ZF_Neuroectoderm	8
DEW048_ACTTCAAT_TACCGGCA	11	mesoderm - lateral plate	ZF_Intermediate mesoderm	8
DEW048_TCCAGGGA_TTGGACTT	22	tailbud - spinal cord	ZF_Tailbud	8
DEW048_TGACTCGATGC_GGACTTCC	2	neural plate - anterior	ZF_Neuroectoderm	8
DEW048_AGAACGATT_TAGTGGAC	11	tailbud - PSM	ZF_Presomitic mesoderm	8
DEW048_AGTTACCGC_GCTCTAGT	2	neural plate - anterior	ZF_Neuroectoderm	8
DEW048_GAATTCCTTG_ATGCGGAT	2	neural plate - posterior	ZF_Neuroectoderm	8
DEW048_TAGCTTAT_TGGCCTGT	11	tailbud - PSM	ZF_Presomitic mesoderm	8
DEW048_AGAAGTGCC_GAAAGACC	14	tailbud - spinal cord	ZF_Tailbud	8
DEW048_AATGTTTG_AAGATTGT	63	notocord	ZF_Notochord	8
DEW048_GATGTGAG_CTCCGCAT	74	tailbud - spinal cord	ZF_Tailbud	8
DEW048_ATCATGAGG_CACAAGGC	2	neural plate - anterior	ZF_Neuroectoderm	8
DEW048_TGAGGTCTGAC_TGTAAAGG	63	notocord	ZF_Notochord	8
DEW048_GAGAGCCCAT_CCACATTA	11	tailbud - PSM	ZF_Presomitic mesoderm	8
DEW048_GAGTTTCG_ATGACTTT	2	neural plate - anterior	ZF_Neuroectoderm	8
DEW048_ATTCGTTCC_CCCAAGCA	2	neural plate - anterior	ZF_Neuroectoderm	8
DEW048_CTTCGATT_GTCCAAAG	14	tailbud - spinal cord	ZF_Tailbud	8
DEW048_AAAGTAATC_AGCGCCTT	22	tailbud - spinal cord	ZF_Tailbud	8
DEW048_GTTGCACG_GTTGCACG	11	mesoderm - lateral plate	ZF_Intermediate mesoderm	8
DEW048_GACATCTCCC_CAGGTGTC	11	mesoderm - lateral plate	ZF_Intermediate mesoderm	8
DEW048_AAATCGGGT_GAATTCGT	11	mesoderm - lateral plate	ZF_Intermediate mesoderm	8
DEW048_ACGTGCTAG_CGGGTAGT	14	tailbud - spinal cord	ZF_Tailbud	8
DEW048_GAGGCGTTAG_CACGGACT	2	tailbud - spinal cord	ZF_Tailbud	8
DEW048_TCCAGGGA_GGCGTTAG	63	notocord	ZF_Notochord	8
DEW048_TGATGTCTTTC_AGGTTGTG	74	neural plate - anterior	ZF_Neuroectoderm	8
DEW048_AAAGTAATC_TTAGTCCG	2	neural plate - anterior	ZF_Neuroectoderm	8
DEW048_AAGTGAAAG_GCCGGATT	2	neural plate - anterior	ZF_Neuroectoderm	8
DEW048_AAAGTAATC_TTAAACTG	2	neural plate - anterior	ZF_Neuroectoderm	8
[truncated: 34,932 more rows]

## Sheet: Xenopus tropicalis
Cell name	Barcode name	Barcode sequence	Leiden cluster	Cell type (original)	Cell type (in this study)	Developmental stage
[truncated: 123,633 more rows]

[truncated: 1 more sheets: Mus musculus]
