# Supplementary material for: Mapping single-cell atlases throughout Metazoa unravels cell type evolution
Source: eLife. 2021 May 4;10:e66747. doi: 10.7554/eLife.66747 (PMC8139856; doi:10.7554/eLife.66747)
Supplement: Supplementary file 3. — The two highest-scoring partners are reported for each cell type in the original mapping and the mapping after its homolog was removed. The new mappings are categorized as being present in the original analysis, not present in the original analysis but connecting developmentally related cells, or neither. [file elife-66747-supp3.xlsx]

## Sheet: Dropout experiment
Removed cell type	Original mappings		Perturbed mappings		Category
Dr_Blastula	Xt_Blastula	NA	Xt_Endoderm	NA	Related	Category legend
Dr_Blood	Xt_Blood	NA	NA	NA		Related = The mapped cell types in the dropout experiment are developmentally related
Dr_Endoderm	Xt_Endoderm	NA	NA	NA		Present = The mapped cell types in the dropout experiment are present in the original analysis
Dr_Endothelial	Xt_Endothelial	NA	NA	NA		Neither = Neither present nor related
Dr_Epidermal progenitor	Xt_Epidermal progenitor	NA	Xt_Placodal area	NA	Related
Dr_Eye primordium	Xt_Eye primordium	Xt_Optic	Xt_Optic	NA	Present	Dr = Danio rerio
Dr_Hatching gland	Xt_Hatching gland	NA	NA	NA		Xt = Xenopus tropicalis
Dr_Forebrain/midbrain	Xt_Forebrain/midbrain	Xt_Hindbrain	Xt_Hindbrain	Xt_Eye primordium	Present	NA = No mapping
Dr_Hindbrain	Xt_Hindbrain	NA	Xt_Forebrain/midbrain	NA	Related
Dr_Intermediate mesoderm	Xt_Endothelial	Xt_Intermediate mesoderm	Xt_Endothelial	NA	Present
Dr_Involuting marginal zone	Xt_Involuting marginal zone	NA	Xt_Tailbud	Xt_Neuroectoderm	Related
Dr_Ionocyte	Xt_Ionocyte	NA	NA	NA
Dr_Lens	Xt_Lens	NA	NA	NA
Dr_Neural crest	Xt_Neural crest	NA	Xt_Otic placode	NA	Neither
Dr_Neuroectoderm	Xt_Neuroectoderm	Xt_Non-neural ectoderm	Xt_Non-neural ectoderm	NA	Present
Dr_Neuron	Xt_Neuron	NA	Xt_Rohon-beard neuron	NA	Related
Dr_Non-neural ectoderm	Xt_Non-neural ectoderm	NA	Xt_Neuroectoderm	Xt_Placodal area	Related
Dr_Notochord	Xt_Notochord	Xt_Spemann organizer	Xt_Involuting marginal zone	Xt_Spemann organizer	Present
Dr_Notoplate	Xt_Notoplate	NA	NA	NA
Dr_Optic	Xt_Optic	Xt_Eye primordium	Xt_Eye primordium	NA	Present
Dr_Dorsal organizer	Xt_Spemann organizer	NA	NA	NA
Dr_Otic placode	Xt_Otic placode	NA	NA	NA
Dr_Placodal area	Xt_Placodal area	Xt_Epidermal progenitor	Xt_Epidermal progenitor	NA	Present
Dr_Presomitic mesoderm	Xt_Presomitic mesoderm	Xt_Skeletal muscle	Xt_Skeletal muscle	Xt_Tailbud	Present
Dr_Rohon-beard neuron	Xt_Rohon-beard neuron	Xt_Neuron	Xt_Neuron	NA	Present
Dr_Skeletal muscle	Xt_Skeletal muscle	NA	NA	NA
Dr_Tailbud	Xt_Tailbud	Xt_Hindbrain	Xt_Presomitic mesoderm	Xt_Hindbrain	Present
Xt_Blastula	Dr_Blastula	NA	NA	NA
Xt_Blood	Dr_Blood	NA	NA	NA
Xt_Endoderm	Dr_Endoderm	NA	Dr_Blastula	NA	Related
Xt_Endothelial	Dr_Intermediate mesoderm	Dr_Endothelial	Dr_Intermediate mesoderm	NA	Present
Xt_Epidermal progenitor	Dr_Epidermal progenitor	Dr_Placodal area	Dr_Placodal area	NA	Related
Xt_Eye primordium	Dr_Eye primordium	Dr_Optic	Dr_Optic	Dr_Forebrain/midbrain	Present
Xt_Hatching gland	Dr_Hatching gland	NA	NA	NA
Xt_Forebrain/midbrain	Dr_Forebrain/midbrain	NA	Dr_Hindbrain	NA	Related
Xt_Hindbrain	Dr_Hindbrain	Dr_Forebrain/midbrain	Dr_Forebrain/midbrain	Dr_Tailbud	Present
Xt_Intermediate mesoderm	Dr_Intermediate mesoderm	NA	NA	NA
Xt_Involuting marginal zone	Dr_Involuting marginal zone	NA	Dr_Notochord	NA	Related
Xt_Ionocyte	Dr_Ionocyte	NA	NA	NA
Xt_Lens	Dr_Lens	NA	NA	NA
Xt_Neural crest	Dr_Neural crest	NA	NA	NA
Xt_Neuroectoderm	Dr_Neuroectoderm	NA	Dr_Non-neural ectoderm	Dr_Involuting marginal zone	Related
Xt_Neuron	Dr_Neuron	Dr_Rohon-beard neuron	Dr_Rohon-beard neuron	NA	Present
Xt_Non-neural ectoderm	Dr_Non-neural ectoderm	Dr_Neuroectoderm	Dr_Neuroectoderm	NA	Present
Xt_Notochord	Dr_Notochord	NA	NA	NA
Xt_Notoplate	Dr_Notoplate	NA	NA	NA
Xt_Optic	Dr_Optic	Dr_Eye primordium	Dr_Eye primordium	NA	Present
Xt_Spemann organizer	Dr_Dorsal organizer	Dr_Notochord	Dr_Notochord	NA	Present
Xt_Otic placode	Dr_Otic placode	NA	Dr_Neural crest	NA	Neither
Xt_Placodal area	Dr_Placodal area	NA	Dr_Epidermal progenitor	Dr_Non-neural ectoderm	Related
Xt_Presomitic mesoderm	Dr_Presomitic mesoderm	NA	Dr_Tailbud	Dr_Involuting marginal zone	Related
Xt_Pronephric mesenchyme	Dr_Forebrain/midbrain	NA	NA	NA
Xt_Rohon-beard neuron	Dr_Rohon-beard neuron	NA	Dr_Neuron	NA	Related
Xt_Skeletal muscle	Dr_Skeletal muscle	Dr_Presomitic mesoderm	Dr_Presomitic mesoderm	NA	Present
Xt_Tailbud	Dr_Tailbud	Dr_Presomitic mesoderm	Dr_Involuting marginal zone	Dr_Presomitic mesoderm	Present
