# Supplementary material for: Mapping single-cell atlases throughout Metazoa unravels cell type evolution
Source: eLife. 2021 May 4;10:e66747. doi: 10.7554/eLife.66747 (PMC8139856; doi:10.7554/eLife.66747)
Supplement: Supplementary file 4. — Each row contains a pair of vertebrate-orthologous genes and a corresponding pair of eukaryotic paralogs with higher correlation in expression compared to the orthologs, the expression correlations for ortholog and paralog pairs, the difference between their correlations, the paralogs’ last common ancestor, and the cell types in which the genes are enriched. Highlighted rows are shown in Figure 3A. [file elife-66747-supp4.xlsx]

## Sheet: paralog_substitutions
Ortholog pairs	Paralog pairs	Ortholog correlation	Paralog correlation	Correlation difference	Most recent common ancestor	Differentially expressing cell types (Danio rerio)	Differentially expressing cell types (Xenopus tropicalis)
Xt_klhl40;Dr_klhl40b	Xt_klhl40;Dr_klhl41b	0	0.931263	0.931263	Chordata	Dr_Skeletal muscle	Xt_Skeletal muscle
Xt_klhl40;Dr_klhl40a	Xt_klhl40;Dr_klhl41b	0	0.931263	0.931263	Chordata	Dr_Skeletal muscle	Xt_Skeletal muscle
Xt_ckm;Dr_ckbb	Xt_ckm;Dr_ckmb	0	0.889237	0.889237	Chordata	Dr_Skeletal muscle	Xt_Skeletal muscle
Xt_loxl2;Dr_loxl2a	Xt_loxl2;Dr_loxl3b	0	0.767235	0.767235	Chordata
Dr_loxl3b;Xt_LOC101733365	Dr_loxl3b;Xt_loxl2	0	0.767235	0.767235	Chordata
Xt_t;Dr_t	Xt_t;Dr_ta	0	0.741202	0.741202	Chordata	Dr_Dorsal organizer;Dr_Involuting marginal zone;Dr_Notochord;Dr_Presomitic mesoderm;Dr_Tailbud	Xt_Involuting marginal zone;Xt_Notochord;Xt_Presomitic mesoderm;Xt_Spemann organizer;Xt_Tailbud
Xt_Xetrov90007542m;Dr_zgc:152670	Xt_Xetrov90007542m;Dr_p4ha1b	0	0.680132	0.680132	Chordata	Dr_Epidermal progenitor;Dr_Notochord;Dr_Placodal area	Xt_Epidermal progenitor;Xt_Notochord
Xt_cldn4;Dr_LOC100147871	Xt_cldn4;Dr_cldne	0.0170067	0.669905	0.652898	Chordata	Dr_Endoderm;Dr_Ionocyte;Dr_Rare epidermal subtypes;Dr_Secretory epidermal	Xt_Cement gland primordium;Xt_Endoderm;Xt_Goblet cell;Xt_Hatching gland;Xt_Ionocyte;Xt_Small secretory cells
Xt_ckm;Dr_ckba	Xt_ckm;Dr_ckmb	0.244929	0.889237	0.644308	Chordata	Dr_Skeletal muscle	Xt_Skeletal muscle
Dr_p4ha1b;Xt_Xetrov90017956m	Dr_p4ha1b;Xt_Xetrov90007542m	0.0466849	0.680132	0.633447	Chordata	Dr_Epidermal progenitor;Dr_Notochord;Dr_Placodal area	Xt_Epidermal progenitor;Xt_Notochord
Dr_p4ha1b;Xt_p4ha1-like.2	Dr_p4ha1b;Xt_Xetrov90007542m	0.0727706	0.680132	0.607361	Chordata	Dr_Epidermal progenitor;Dr_Notochord;Dr_Placodal area	Xt_Epidermal progenitor;Xt_Notochord
Xt_syncrip;Dr_syncrip	Xt_syncrip;Dr_hnrnpr	0	0.598846	0.598846	Chordata	Dr_Dorsal organizer;Dr_Involuting marginal zone;Dr_Neuroectoderm;Dr_Non-neural ectoderm	Xt_Involuting marginal zone;Xt_Neuroectoderm;Xt_Non-neural ectoderm;Xt_Spemann organizer
Xt_cldn4;Dr_cldnd	Xt_cldn4;Dr_cldne	0.0812548	0.669905	0.58865	Chordata	Dr_Endoderm;Dr_Ionocyte;Dr_Rare epidermal subtypes;Dr_Secretory epidermal	Xt_Cement gland primordium;Xt_Endoderm;Xt_Goblet cell;Xt_Hatching gland;Xt_Ionocyte;Xt_Small secretory cells
Dr_hnrnpr;Xt_hnrnpr-like	Dr_hnrnpr;Xt_syncrip	0.0416191	0.598846	0.557226	Chordata	Dr_Dorsal organizer;Dr_Involuting marginal zone;Dr_Neuroectoderm;Dr_Non-neural ectoderm	Xt_Involuting marginal zone;Xt_Neuroectoderm;Xt_Non-neural ectoderm;Xt_Spemann organizer
Dr_p4ha2;Xt_LOC101734880	Dr_p4ha2;Xt_p4ha1-like.1	0	0.55535	0.55535	Chordata	Dr_Dorsal organizer;Dr_Notochord	Xt_Notochord;Xt_Spemann organizer
Xt_myl9;Dr_myl9a	Xt_myl9;Dr_myl12.1	0	0.553637	0.553637	Chordata	Dr_Endothelial;Dr_Epidermal progenitor;Dr_Intermediate mesoderm;Dr_Placodal area	Xt_Endothelial;Xt_Epidermal progenitor;Xt_Placodal area
Dr_pfklb;Xt_LOC101733741	Dr_pfklb;Xt_pfkp	0	0.546344	0.546344	Chordata	Dr_Epidermal progenitor;Dr_Skeletal muscle	Xt_Epidermal progenitor;Xt_Skeletal muscle
Xt_pfkp;Dr_pfkpb	Xt_pfkp;Dr_pfklb	0	0.546344	0.546344	Chordata	Dr_Epidermal progenitor;Dr_Skeletal muscle	Xt_Epidermal progenitor;Xt_Skeletal muscle
Xt_pfkp;Dr_pfkpa	Xt_pfkp;Dr_pfklb	0	0.546344	0.546344	Chordata	Dr_Epidermal progenitor;Dr_Skeletal muscle	Xt_Epidermal progenitor;Xt_Skeletal muscle
Xt_cldn6.1;Dr_cldna	Xt_cldn6.1;Dr_cldnd	0	0.54364	0.54364	Chordata	Dr_Blastula	Xt_Blastula
Dr_ccne2;Xt_ccne2	Dr_ccne2;Xt_ccne1	0.0356672	0.571029	0.535362	Chordata	Dr_Involuting marginal zone;Dr_Neuroectoderm;Dr_Non-neural ectoderm	Xt_Involuting marginal zone;Xt_Neuroectoderm;Xt_Non-neural ectoderm
Dr_six3a;Xt_six3	Dr_six3a;Xt_six6	0	0.517978	0.517978	Chordata	Dr_Eye primordium;Dr_Forebrain/midbrain;Dr_Optic	Xt_Eye primordium;Xt_Optic
Xt_smek2;Dr_LOC103911969	Xt_smek2;Dr_smek1	0.0184395	0.534885	0.516446	Chordata	Dr_Blastula;Dr_Involuting marginal zone;Dr_Neuroectoderm;Dr_Non-neural ectoderm;Dr_Tailbud	Xt_Blastula;Xt_Hindbrain;Xt_Involuting marginal zone;Xt_Neuroectoderm;Xt_Non-neural ectoderm
Dr_si:ch73-386h18.1;Xt_zfhx3	Dr_si:ch73-386h18.1;Xt_zfhx4	0	0.511945	0.511945	Chordata	Dr_Forebrain/midbrain;Dr_Hindbrain;Dr_Neuron	Xt_Forebrain/midbrain;Xt_Hindbrain;Xt_Neuron
Dr_tie1;Xt_tie1	Dr_tie1;Xt_tek	0.125216	0.635337	0.510121	Chordata
Xt_arvcf;Dr_arvcfb	Xt_arvcf;Dr_ctnnd1	0	0.509954	0.509954	Chordata	Dr_Endoderm;Dr_Epidermal progenitor;Dr_Involuting marginal zone;Dr_Neuroectoderm;Dr_Non-neural ectoderm;Dr_Placodal area	Xt_Endoderm;Xt_Epidermal progenitor;Xt_Involuting marginal zone;Xt_Neuroectoderm;Xt_Non-neural ectoderm;Xt_Placodal area;Xt_Small secretory cells
Xt_papola;Dr_papola	Xt_papola;Dr_papolg	0	0.500787	0.500787	Chordata	Dr_Blastula	Xt_Blastula
Dr_stab1;Xt_LOC100491533	Dr_stab1;Xt_stab2	0	0.497856	0.497856	Chordata
Xt_stab2;Dr_LOC101882428	Xt_stab2;Dr_stab1	0	0.497856	0.497856	Chordata
Xt_hnrnph3;Dr_hnrnph3	Xt_hnrnph3;Dr_hnrnph1l	0	0.49447	0.49447	Chordata	Dr_Eye primordium;Dr_Neuroectoderm;Dr_Non-neural ectoderm;Dr_Presomitic mesoderm;Dr_Tailbud	Xt_Eye primordium;Xt_Hindbrain;Xt_Neuroectoderm;Xt_Non-neural ectoderm;Xt_Optic;Xt_Tailbud
Xt_t2;Dr_t	Xt_t2;Dr_ta	0	0.482578	0.482578	Chordata	Dr_Involuting marginal zone;Dr_Notochord;Dr_Presomitic mesoderm;Dr_Tailbud	Xt_Involuting marginal zone;Xt_Notochord;Xt_Tailbud
Dr_grhl2a;Xt_grhl2	Dr_grhl2a;Xt_grhl1	0	0.481791	0.481791	Chordata	Dr_Hatching gland;Dr_Ionocyte;Dr_Rare epidermal subtypes;Dr_Secretory epidermal	Xt_Cement gland primordium;Xt_Goblet cell;Xt_Hatching gland;Xt_Ionocyte;Xt_Small secretory cells
Dr_zar1;Xt_zar1	Dr_zar1;Xt_LOC734032-like	0.035583	0.516498	0.480915	Chordata	Dr_Blastula	Xt_Blastula
Xt_six6;Dr_six6b	Xt_six6;Dr_six3a	0.0378118	0.517978	0.480166	Chordata	Dr_Eye primordium;Dr_Forebrain/midbrain;Dr_Optic	Xt_Eye primordium;Xt_Optic
Xt_six6;Dr_six6a	Xt_six6;Dr_six3a	0.0539919	0.517978	0.463986	Chordata	Dr_Eye primordium;Dr_Forebrain/midbrain;Dr_Optic	Xt_Eye primordium;Xt_Optic
Dr_plod3;Xt_plod3	Dr_plod3;Xt_Xetrov90018273m	0.0150868	0.478277	0.463191	Chordata	Dr_Dorsal organizer;Dr_Endothelial;Dr_Intermediate mesoderm;Dr_Notochord;Dr_Notoplate;Dr_Presomitic mesoderm	Xt_Endothelial;Xt_Notochord;Xt_Notoplate;Xt_Skeletal muscle;Xt_Spemann organizer
Dr_cldnd;Xt_cldn4	Dr_cldnd;Xt_cldn6.1	0.0812548	0.54364	0.462385	Chordata	Dr_Blastula	Xt_Blastula
Xt_p4ha1-like.1;Dr_p4ha1a	Xt_p4ha1-like.1;Dr_p4ha2	0.105144	0.55535	0.450205	Chordata	Dr_Dorsal organizer;Dr_Notochord	Xt_Notochord;Xt_Spemann organizer
Xt_srsf5;Dr_srsf5b	Xt_srsf5;Dr_srsf6a	0	0.442298	0.442298	Chordata	Dr_Dorsal organizer;Dr_Endoderm;Dr_Involuting marginal zone;Dr_Neuroectoderm;Dr_Non-neural ectoderm;Dr_Notochord	Xt_Endoderm;Xt_Involuting marginal zone;Xt_Neuroectoderm;Xt_Non-neural ectoderm;Xt_Spemann organizer
Xt_myl12b;Dr_myl12.2	Xt_myl12b;Dr_myl9b	0	0.441301	0.441301	Chordata	Dr_Endothelial;Dr_Epidermal progenitor;Dr_Intermediate mesoderm;Dr_Macrophage;Dr_Placodal area;Dr_Rare epidermal subtypes	Xt_Endothelial;Xt_Epidermal progenitor;Xt_Goblet cell;Xt_Hatching gland;Xt_Myeloid progenitors;Xt_Placodal area;Xt_Small secretory cells
Xt_actc1;Dr_acta2	Xt_actc1;Dr_actc1a	0.49768	0.935604	0.437925	Chordata	Dr_Intermediate mesoderm;Dr_Presomitic mesoderm;Dr_Skeletal muscle	Xt_Intermediate mesoderm;Xt_Presomitic mesoderm;Xt_Skeletal muscle
Xt_actc1;Dr_acta2	Xt_actc1;Dr_hm:zewp0073	0.49768	0.93548	0.437801	Chordata	Dr_Intermediate mesoderm;Dr_Presomitic mesoderm;Dr_Skeletal muscle	Xt_Intermediate mesoderm;Xt_Presomitic mesoderm;Xt_Skeletal muscle
Xt_srsf5;Dr_srsf5b	Xt_srsf5;Dr_srsf4	0	0.436267	0.436267	Chordata	Dr_Dorsal organizer;Dr_Endoderm;Dr_Involuting marginal zone;Dr_Neuroectoderm;Dr_Non-neural ectoderm;Dr_Notochord	Xt_Endoderm;Xt_Involuting marginal zone;Xt_Neuroectoderm;Xt_Non-neural ectoderm;Xt_Spemann organizer
Xt_tfap2e;Dr_tfap2e	Xt_tfap2e;Dr_tfap2a	0	0.430606	0.430606	Chordata	Dr_Neural crest	Xt_Neural crest
Xt_rbm27;Dr_rbm27	Xt_rbm27;Dr_rbm26	0.0165395	0.442276	0.425737	Chordata
Xt_pum2;Dr_pum2	Xt_pum2;Dr_pum1	0	0.417684	0.417684	Chordata	Dr_Dorsal organizer;Dr_Endoderm;Dr_Involuting marginal zone;Dr_Neuroectoderm;Dr_Non-neural ectoderm;Dr_Notochord	Xt_Endoderm;Xt_Involuting marginal zone;Xt_Neuroectoderm;Xt_Non-neural ectoderm;Xt_Notochord;Xt_Spemann organizer
Dr_zc3h12b;Xt_zc3h12b	Dr_zc3h12b;Xt_zc3h12c	0.00588191	0.417821	0.411939	Chordata	Dr_Eye primordium;Dr_Forebrain/midbrain;Dr_Hindbrain;Dr_Neuron;Dr_Tailbud	Xt_Forebrain/midbrain;Xt_Hindbrain;Xt_Neuron;Xt_Optic
Xt_LOC101734319;Dr_colgalt1	Xt_LOC101734319;Dr_cercam	0	0.402988	0.402988	Chordata	Dr_Notochord	Xt_Notochord
Xt_LOC101734319;Dr_colgalt2	Xt_LOC101734319;Dr_cercam	0	0.402988	0.402988	Chordata	Dr_Notochord	Xt_Notochord
Xt_LOC101734319;Dr_si:ch211-114l13.7	Xt_LOC101734319;Dr_cercam	0	0.402988	0.402988	Chordata	Dr_Notochord	Xt_Notochord
Xt_qki;Dr_qkib	Xt_qki;Dr_qkia	0.0170933	0.416066	0.398972	Chordata	Dr_Endothelial;Dr_Intermediate mesoderm;Dr_Notochord;Dr_Presomitic mesoderm;Dr_Skeletal muscle	Xt_Endothelial;Xt_Intermediate mesoderm;Xt_Notochord;Xt_Presomitic mesoderm;Xt_Skeletal muscle
Xt_wiz-like;Dr_si:ch211-194b1.1	Xt_wiz-like;Dr_si:dkey-217d24.6	0.00820496	0.380019	0.371814	Chordata	Dr_Blastula;Dr_Neuroectoderm	Xt_Blastula;Xt_Neuroectoderm;Xt_Non-neural ectoderm
Xt_arid3a;Dr_arid3a	Xt_arid3a;Dr_arid3b	0	0.371217	0.371217	Chordata	Dr_Endoderm;Dr_Epidermal progenitor;Dr_Ionocyte;Dr_Placodal area;Dr_Presomitic mesoderm;Dr_Rare epidermal subtypes;Dr_Rohon-beard neuron;Dr_Tailbud	Xt_Epidermal progenitor;Xt_Ionocyte;Xt_Placodal area;Xt_Presomitic mesoderm;Xt_Rohon-beard neuron;Xt_Skeletal muscle;Xt_Small secretory cells;Xt_Tailbud
Xt_arid3a;Dr_arid3c	Xt_arid3a;Dr_arid3b	0	0.371217	0.371217	Chordata	Dr_Endoderm;Dr_Epidermal progenitor;Dr_Ionocyte;Dr_Placodal area;Dr_Presomitic mesoderm;Dr_Rare epidermal subtypes;Dr_Rohon-beard neuron;Dr_Tailbud	Xt_Epidermal progenitor;Xt_Ionocyte;Xt_Placodal area;Xt_Presomitic mesoderm;Xt_Rohon-beard neuron;Xt_Skeletal muscle;Xt_Small secretory cells;Xt_Tailbud
Dr_zar1;Xt_zar1	Dr_zar1;Xt_LOC100486817-like	0.035583	0.396715	0.361132	Chordata	Dr_Blastula	Xt_Blastula
Xt_ube2e3;Dr_ube2e2	Xt_ube2e3;Dr_ube2e1	0	0.3609	0.3609	Chordata
Dr_arid3b;Xt_arid3b	Dr_arid3b;Xt_arid3a	0.0131863	0.371217	0.358031	Chordata	Dr_Endoderm;Dr_Epidermal progenitor;Dr_Ionocyte;Dr_Placodal area;Dr_Presomitic mesoderm;Dr_Rare epidermal subtypes;Dr_Rohon-beard neuron;Dr_Tailbud	Xt_Epidermal progenitor;Xt_Ionocyte;Xt_Placodal area;Xt_Presomitic mesoderm;Xt_Rohon-beard neuron;Xt_Skeletal muscle;Xt_Small secretory cells;Xt_Tailbud
Dr_hnrnpul1;Xt_hnrnpul1	Dr_hnrnpul1;Xt_hnrnpu	0.164378	0.519318	0.354941	Chordata	Dr_Dorsal organizer;Dr_Eye primordium;Dr_Forebrain/midbrain;Dr_Intermediate mesoderm;Dr_Neuroectoderm;Dr_Non-neural ectoderm;Dr_Presomitic mesoderm;Dr_Tailbud	Xt_Eye primordium;Xt_Forebrain/midbrain;Xt_Hindbrain;Xt_Neuroectoderm;Xt_Non-neural ectoderm;Xt_Presomitic mesoderm;Xt_Spemann organizer;Xt_Tailbud
Xt_srsf5;Dr_srsf5b	Xt_srsf5;Dr_srsf6b	0	0.353315	0.353315	Chordata
Dr_mknk2a;Xt_mknk2	Dr_mknk2a;Xt_LOC101733835	0	0.353289	0.353289	Chordata
Xt_ube2e3;Dr_ube2e3	Xt_ube2e3;Dr_ube2e1	0.00935975	0.3609	0.35154	Chordata
Dr_prdm16;Xt_prdm16	Dr_prdm16;Xt_mecom	0	0.347941	0.347941	Chordata
Dr_pygb;Xt_pygm	Dr_pygb;Xt_pygl	0	0.333712	0.333712	Chordata	Dr_Macrophage	Xt_Myeloid progenitors
Xt_pygl;Dr_pygl	Xt_pygl;Dr_pygb	0	0.333712	0.333712	Chordata	Dr_Macrophage	Xt_Myeloid progenitors
Dr_ribc2;Xt_ribc2	Dr_ribc2;Xt_ribc1	0.452756	0.782544	0.329788	Chordata	Dr_Notoplate	Xt_Notoplate
Xt_slc5a1.2;Dr_slc5a1	Xt_slc5a1.2;Dr_slc5a2	0	0.32906	0.32906	Chordata
Dr_slc5a2;Xt_slc5a2	Dr_slc5a2;Xt_slc5a1.2	0	0.32906	0.32906	Chordata
Dr_pygb;Xt_LOC100491051-like	Dr_pygb;Xt_pygl	0.00544345	0.333712	0.328269	Chordata	Dr_Macrophage	Xt_Myeloid progenitors
Dr_pou4f1;Xt_LOC100488759	Dr_pou4f1;Xt_pou4f1.2	0	0.326071	0.326071	Chordata	Dr_Rohon-beard neuron	Xt_Neuron;Xt_Rohon-beard neuron
Xt_pou4f1.2;Dr_pou4f3	Xt_pou4f1.2;Dr_pou4f1	0	0.326071	0.326071	Chordata	Dr_Rohon-beard neuron	Xt_Neuron;Xt_Rohon-beard neuron
Xt_LOC100489980-like;Dr_cyp26c1	Xt_LOC100489980-like;Dr_cyp26b1	0.332688	0.658564	0.325876	Chordata	Dr_Hindbrain	Xt_Hindbrain
Dr_srsf4;Xt_srsf4-like	Dr_srsf4;Xt_srsf6	0.298249	0.620807	0.322558	Chordata	Dr_Dorsal organizer;Dr_Endoderm;Dr_Involuting marginal zone;Dr_Neuroectoderm;Dr_Non-neural ectoderm;Dr_Notochord;Dr_Tailbud	Xt_Endoderm;Xt_Hindbrain;Xt_Involuting marginal zone;Xt_Neuroectoderm;Xt_Non-neural ectoderm;Xt_Spemann organizer
Xt_twf2;Dr_twf2b	Xt_twf2;Dr_twf1a	0	0.320277	0.320277	Chordata
Dr_ccnt1;Xt_ccnt1	Dr_ccnt1;Xt_ccnt2	0	0.319348	0.319348	Chordata
Xt_ccnt2;Dr_ccnt2a	Xt_ccnt2;Dr_ccnt1	0	0.319348	0.319348	Chordata
Xt_pfkfb3;Dr_pfkfb3	Xt_pfkfb3;Dr_pfkfb4l	0	0.319101	0.319101	Chordata	Dr_Involuting marginal zone;Dr_Neuroectoderm;Dr_Neuron;Dr_Non-neural ectoderm	Xt_Involuting marginal zone;Xt_Neuroectoderm;Xt_Neuron;Xt_Non-neural ectoderm
Xt_stag1;Dr_stag1a	Xt_stag1;Dr_stag2b	0.0238646	0.339126	0.315262	Chordata	Dr_Involuting marginal zone;Dr_Neuroectoderm;Dr_Non-neural ectoderm;Dr_Tailbud	Xt_Hindbrain;Xt_Involuting marginal zone;Xt_Neuroectoderm;Xt_Non-neural ectoderm
Xt_pim3;Dr_pim1	Xt_pim3;Dr_pim3	0	0.31404	0.31404	Chordata	Dr_Blastula;Dr_Rohon-beard neuron	Xt_Blastula;Xt_Neuron
Dr_kdm2a;Xt_kdm2a	Dr_kdm2a;Xt_Xetrov90003142m	0	0.312066	0.312066	Chordata
Xt_Xetrov90003142m;Dr_kdm2bb	Xt_Xetrov90003142m;Dr_kdm2a	0	0.312066	0.312066	Chordata
Xt_Xetrov90003142m;Dr_kdm2b	Xt_Xetrov90003142m;Dr_kdm2a	0	0.312066	0.312066	Chordata
Xt_kat7;Dr_kat7a	Xt_kat7;Dr_kat7b	0	0.311175	0.311175	Chordata
Xt_nrcam;Dr_LOC103909644	Xt_nrcam;Dr_chl1b	0	0.309875	0.309875	Chordata	Dr_Forebrain/midbrain;Dr_Hindbrain	Xt_Hindbrain
Dr_chl1b;Xt_LOC101735183	Dr_chl1b;Xt_nrcam	0	0.309875	0.309875	Chordata	Dr_Forebrain/midbrain;Dr_Hindbrain	Xt_Hindbrain
Dr_chl1b;Xt_Xetrov90029672m	Dr_chl1b;Xt_nrcam	0	0.309875	0.309875	Chordata	Dr_Forebrain/midbrain;Dr_Hindbrain	Xt_Hindbrain
Dr_chl1b;Xt_Xetrov90030664m	Dr_chl1b;Xt_nrcam	0	0.309875	0.309875	Chordata	Dr_Forebrain/midbrain;Dr_Hindbrain	Xt_Hindbrain
Xt_nrcam;Dr_nrcama	Xt_nrcam;Dr_chl1b	0	0.309875	0.309875	Chordata	Dr_Forebrain/midbrain;Dr_Hindbrain	Xt_Hindbrain
Xt_nrcam;Dr_nrcamb	Xt_nrcam;Dr_chl1b	0	0.309875	0.309875	Chordata	Dr_Forebrain/midbrain;Dr_Hindbrain	Xt_Hindbrain
Xt_rps6ka1;Dr_rps6ka1	Xt_rps6ka1;Dr_rps6ka3a	0	0.309799	0.309799	Chordata	Dr_Blastula;Dr_Involuting marginal zone;Dr_Macrophage	Xt_Blastula;Xt_Involuting marginal zone;Xt_Myeloid progenitors
Dr_rps6ka3a;Xt_LOC100496161	Dr_rps6ka3a;Xt_rps6ka1	0	0.309799	0.309799	Chordata	Dr_Blastula;Dr_Involuting marginal zone;Dr_Macrophage	Xt_Blastula;Xt_Involuting marginal zone;Xt_Myeloid progenitors
Xt_fxr1;Dr_fxr1	Xt_fxr1;Dr_fxr2	0.422893	0.73261	0.309717	Chordata	Dr_Dorsal organizer;Dr_Involuting marginal zone;Dr_Neuroectoderm;Dr_Non-neural ectoderm;Dr_Notochord;Dr_Presomitic mesoderm;Dr_Skeletal muscle	Xt_Involuting marginal zone;Xt_Neuroectoderm;Xt_Non-neural ectoderm;Xt_Presomitic mesoderm;Xt_Skeletal muscle;Xt_Spemann organizer
Xt_pfkfb3;Dr_pfkfb3	Xt_pfkfb3;Dr_pfkfb4b	0	0.308469	0.308469	Chordata	Dr_Involuting marginal zone;Dr_Neuroectoderm;Dr_Non-neural ectoderm	Xt_Involuting marginal zone;Xt_Neuroectoderm;Xt_Non-neural ectoderm
Xt_syncrip;Dr_syncripl	Xt_syncrip;Dr_hnrnpr	0.290544	0.598846	0.308301	Chordata	Dr_Dorsal organizer;Dr_Involuting marginal zone;Dr_Neuroectoderm;Dr_Non-neural ectoderm	Xt_Involuting marginal zone;Xt_Neuroectoderm;Xt_Non-neural ectoderm;Xt_Spemann organizer
Xt_actc1;Dr_acta2	Xt_actc1;Dr_actc1b	0.49768	0.803799	0.306119	Chordata	Dr_Presomitic mesoderm;Dr_Skeletal muscle	Xt_Presomitic mesoderm;Xt_Skeletal muscle
Xt_zcchc6;Dr_zcchc6	Xt_zcchc6;Dr_LOC795358	0.135158	0.439507	0.304349	Chordata	Dr_Blastula;Dr_Involuting marginal zone;Dr_Neuroectoderm;Dr_Non-neural ectoderm	Xt_Blastula;Xt_Involuting marginal zone;Xt_Neuroectoderm;Xt_Non-neural ectoderm
Dr_plod2;Xt_plod2-like	Dr_plod2;Xt_Xetrov90018273m	0.220513	0.524259	0.303745	Chordata	Dr_Notochord;Dr_Presomitic mesoderm	Xt_Notochord;Xt_Skeletal muscle;Xt_Spemann organizer
Xt_act3;Dr_acta2	Xt_act3;Dr_actc1b	0.640838	0.944169	0.303331	Chordata	Dr_Presomitic mesoderm;Dr_Skeletal muscle	Xt_Skeletal muscle
Dr_cyp26b1;Xt_cyp26b1	Dr_cyp26b1;Xt_LOC100489980-like	0.357086	0.658564	0.301478	Chordata	Dr_Hindbrain	Xt_Hindbrain
Xt_kdr;Dr_kdr	Xt_kdr;Dr_kdrl	0	0.301466	0.301466	Chordata
Dr_LOC103909603;Xt_Xetrov90013012m	Dr_LOC103909603;Xt_capn1-like.1	0	0.749932	0.749932	Bilateria	Dr_Epidermal progenitor;Dr_Ionocyte;Dr_Placodal area;Dr_Rare epidermal subtypes;Dr_Secretory epidermal	Xt_Cement gland primordium;Xt_Epidermal progenitor;Xt_Goblet cell;Xt_Hatching gland;Xt_Ionocyte;Xt_Small secretory cells
Xt_capn1-like.1;Dr_capn1a	Xt_capn1-like.1;Dr_LOC103909603	0	0.749932	0.749932	Bilateria	Dr_Epidermal progenitor;Dr_Ionocyte;Dr_Placodal area;Dr_Rare epidermal subtypes;Dr_Secretory epidermal	Xt_Cement gland primordium;Xt_Epidermal progenitor;Xt_Goblet cell;Xt_Hatching gland;Xt_Ionocyte;Xt_Small secretory cells
Dr_LOC103909603;Xt_capn2	Dr_LOC103909603;Xt_capn1-like.1	0	0.749932	0.749932	Bilateria	Dr_Epidermal progenitor;Dr_Ionocyte;Dr_Placodal area;Dr_Rare epidermal subtypes;Dr_Secretory epidermal	Xt_Cement gland primordium;Xt_Epidermal progenitor;Xt_Goblet cell;Xt_Hatching gland;Xt_Ionocyte;Xt_Small secretory cells
Xt_capn1-like.1;Dr_zgc:55262	Xt_capn1-like.1;Dr_LOC103909603	0	0.749932	0.749932	Bilateria	Dr_Epidermal progenitor;Dr_Ionocyte;Dr_Placodal area;Dr_Rare epidermal subtypes;Dr_Secretory epidermal	Xt_Cement gland primordium;Xt_Epidermal progenitor;Xt_Goblet cell;Xt_Hatching gland;Xt_Ionocyte;Xt_Small secretory cells
Dr_LOC103909603;Xt_capn8	Dr_LOC103909603;Xt_capn1-like.1	0	0.749932	0.749932	Bilateria	Dr_Epidermal progenitor;Dr_Ionocyte;Dr_Placodal area;Dr_Rare epidermal subtypes;Dr_Secretory epidermal	Xt_Cement gland primordium;Xt_Epidermal progenitor;Xt_Goblet cell;Xt_Hatching gland;Xt_Ionocyte;Xt_Small secretory cells
Dr_LOC103909603;Xt_LOC101730581	Dr_LOC103909603;Xt_capn1-like.1	0	0.749932	0.749932	Bilateria	Dr_Epidermal progenitor;Dr_Ionocyte;Dr_Placodal area;Dr_Rare epidermal subtypes;Dr_Secretory epidermal	Xt_Cement gland primordium;Xt_Epidermal progenitor;Xt_Goblet cell;Xt_Hatching gland;Xt_Ionocyte;Xt_Small secretory cells
Xt_capn1-like.1;Dr_si:dkeyp-50d11.2	Xt_capn1-like.1;Dr_LOC103909603	0	0.749932	0.749932	Bilateria	Dr_Epidermal progenitor;Dr_Ionocyte;Dr_Placodal area;Dr_Rare epidermal subtypes;Dr_Secretory epidermal	Xt_Cement gland primordium;Xt_Epidermal progenitor;Xt_Goblet cell;Xt_Hatching gland;Xt_Ionocyte;Xt_Small secretory cells
Dr_LOC103909603;Xt_LOC100497284-like	Dr_LOC103909603;Xt_capn1-like.1	0	0.749932	0.749932	Bilateria	Dr_Epidermal progenitor;Dr_Ionocyte;Dr_Placodal area;Dr_Rare epidermal subtypes;Dr_Secretory epidermal	Xt_Cement gland primordium;Xt_Epidermal progenitor;Xt_Goblet cell;Xt_Hatching gland;Xt_Ionocyte;Xt_Small secretory cells
Dr_LOC103909603;Xt_LOC101731595	Dr_LOC103909603;Xt_capn1-like.1	0	0.749932	0.749932	Bilateria	Dr_Epidermal progenitor;Dr_Ionocyte;Dr_Placodal area;Dr_Rare epidermal subtypes;Dr_Secretory epidermal	Xt_Cement gland primordium;Xt_Epidermal progenitor;Xt_Goblet cell;Xt_Hatching gland;Xt_Ionocyte;Xt_Small secretory cells
Dr_capn8;Xt_Xetrov90013012m	Dr_capn8;Xt_capn1-like.1	0	0.74473	0.74473	Bilateria	Dr_Epidermal progenitor;Dr_Hatching gland;Dr_Ionocyte;Dr_Placodal area;Dr_Rare epidermal subtypes;Dr_Secretory epidermal	Xt_Cement gland primordium;Xt_Epidermal progenitor;Xt_Goblet cell;Xt_Hatching gland;Xt_Ionocyte;Xt_Small secretory cells
Xt_capn1-like.1;Dr_zgc:55262	Xt_capn1-like.1;Dr_capn8	0	0.74473	0.74473	Bilateria	Dr_Epidermal progenitor;Dr_Hatching gland;Dr_Ionocyte;Dr_Placodal area;Dr_Rare epidermal subtypes;Dr_Secretory epidermal	Xt_Cement gland primordium;Xt_Epidermal progenitor;Xt_Goblet cell;Xt_Hatching gland;Xt_Ionocyte;Xt_Small secretory cells
Xt_capn1-like.1;Dr_si:dkeyp-50d11.2	Xt_capn1-like.1;Dr_capn8	0	0.74473	0.74473	Bilateria	Dr_Epidermal progenitor;Dr_Hatching gland;Dr_Ionocyte;Dr_Placodal area;Dr_Rare epidermal subtypes;Dr_Secretory epidermal	Xt_Cement gland primordium;Xt_Epidermal progenitor;Xt_Goblet cell;Xt_Hatching gland;Xt_Ionocyte;Xt_Small secretory cells
Dr_capn8;Xt_LOC100497284-like	Dr_capn8;Xt_capn1-like.1	0	0.74473	0.74473	Bilateria	Dr_Epidermal progenitor;Dr_Hatching gland;Dr_Ionocyte;Dr_Placodal area;Dr_Rare epidermal subtypes;Dr_Secretory epidermal	Xt_Cement gland primordium;Xt_Epidermal progenitor;Xt_Goblet cell;Xt_Hatching gland;Xt_Ionocyte;Xt_Small secretory cells
Dr_capn8;Xt_LOC101730581	Dr_capn8;Xt_capn1-like.1	0	0.74473	0.74473	Bilateria	Dr_Epidermal progenitor;Dr_Hatching gland;Dr_Ionocyte;Dr_Placodal area;Dr_Rare epidermal subtypes;Dr_Secretory epidermal	Xt_Cement gland primordium;Xt_Epidermal progenitor;Xt_Goblet cell;Xt_Hatching gland;Xt_Ionocyte;Xt_Small secretory cells
Xt_capn1-like.1;Dr_capn1a	Xt_capn1-like.1;Dr_capn8	0	0.74473	0.74473	Bilateria	Dr_Epidermal progenitor;Dr_Hatching gland;Dr_Ionocyte;Dr_Placodal area;Dr_Rare epidermal subtypes;Dr_Secretory epidermal	Xt_Cement gland primordium;Xt_Epidermal progenitor;Xt_Goblet cell;Xt_Hatching gland;Xt_Ionocyte;Xt_Small secretory cells
Dr_capn8;Xt_capn8	Dr_capn8;Xt_capn1-like.1	0	0.74473	0.74473	Bilateria	Dr_Epidermal progenitor;Dr_Hatching gland;Dr_Ionocyte;Dr_Placodal area;Dr_Rare epidermal subtypes;Dr_Secretory epidermal	Xt_Cement gland primordium;Xt_Epidermal progenitor;Xt_Goblet cell;Xt_Hatching gland;Xt_Ionocyte;Xt_Small secretory cells
Dr_capn8;Xt_LOC101731595	Dr_capn8;Xt_capn1-like.1	0	0.74473	0.74473	Bilateria	Dr_Epidermal progenitor;Dr_Hatching gland;Dr_Ionocyte;Dr_Placodal area;Dr_Rare epidermal subtypes;Dr_Secretory epidermal	Xt_Cement gland primordium;Xt_Epidermal progenitor;Xt_Goblet cell;Xt_Hatching gland;Xt_Ionocyte;Xt_Small secretory cells
Dr_capn8;Xt_capn2	Dr_capn8;Xt_capn1-like.1	0	0.74473	0.74473	Bilateria	Dr_Epidermal progenitor;Dr_Hatching gland;Dr_Ionocyte;Dr_Placodal area;Dr_Rare epidermal subtypes;Dr_Secretory epidermal	Xt_Cement gland primordium;Xt_Epidermal progenitor;Xt_Goblet cell;Xt_Hatching gland;Xt_Ionocyte;Xt_Small secretory cells
Dr_capn2l;Xt_capn2.2	Dr_capn2l;Xt_capn9	0	0.687932	0.687932	Bilateria	Dr_Ionocyte;Dr_Rare epidermal subtypes;Dr_Secretory epidermal	Xt_Cement gland primordium;Xt_Goblet cell;Xt_Hatching gland;Xt_Ionocyte
Dr_capn2l;Xt_LOC101733523	Dr_capn2l;Xt_capn9	0	0.687932	0.687932	Bilateria	Dr_Ionocyte;Dr_Rare epidermal subtypes;Dr_Secretory epidermal	Xt_Cement gland primordium;Xt_Goblet cell;Xt_Hatching gland;Xt_Ionocyte
Xt_nt5c2;Dr_nt5c2b	Xt_nt5c2;Dr_nt5c2l1	0	0.674852	0.674852	Bilateria	Dr_Blood	Xt_Blood
Xt_nt5c2;Dr_nt5c2a	Xt_nt5c2;Dr_nt5c2l1	0	0.674852	0.674852	Bilateria	Dr_Blood	Xt_Blood
Dr_nt5c2l1;Xt_LOC100496104	Dr_nt5c2l1;Xt_nt5c2	0	0.674852	0.674852	Bilateria	Dr_Blood	Xt_Blood
Xt_capn1-like.1;Dr_capn1b	Xt_capn1-like.1;Dr_LOC103909603	0.0874022	0.749932	0.662529	Bilateria	Dr_Epidermal progenitor;Dr_Ionocyte;Dr_Placodal area;Dr_Rare epidermal subtypes;Dr_Secretory epidermal	Xt_Cement gland primordium;Xt_Epidermal progenitor;Xt_Goblet cell;Xt_Hatching gland;Xt_Ionocyte;Xt_Small secretory cells
Xt_LOC100490289-like;Dr_si:ch73-199e17.1	Xt_LOC100490289-like;Dr_LOC795591	0	0.65856	0.65856	Bilateria
Xt_LOC100490289-like;Dr_tuba2	Xt_LOC100490289-like;Dr_LOC795591	0	0.65856	0.65856	Bilateria
Xt_LOC100490289-like;Dr_tuba7l	Xt_LOC100490289-like;Dr_LOC795591	0	0.65856	0.65856	Bilateria
Xt_LOC100490289-like;Dr_tuba8l4	Xt_LOC100490289-like;Dr_LOC795591	0	0.65856	0.65856	Bilateria
Xt_LOC100490289-like;Dr_tuba1b	Xt_LOC100490289-like;Dr_LOC795591	0	0.65856	0.65856	Bilateria
Xt_LOC100490289-like;Dr_tuba8l3	Xt_LOC100490289-like;Dr_LOC795591	0	0.65856	0.65856	Bilateria
Xt_capn1-like.1;Dr_capn1b	Xt_capn1-like.1;Dr_capn8	0.0874022	0.74473	0.657328	Bilateria	Dr_Epidermal progenitor;Dr_Hatching gland;Dr_Ionocyte;Dr_Placodal area;Dr_Rare epidermal subtypes;Dr_Secretory epidermal	Xt_Cement gland primordium;Xt_Epidermal progenitor;Xt_Goblet cell;Xt_Hatching gland;Xt_Ionocyte;Xt_Small secretory cells
Dr_smyhc1;Xt_myh6	Dr_smyhc1;Xt_myh4	0	0.650993	0.650993	Bilateria	Dr_Skeletal muscle	Xt_Skeletal muscle
Xt_myh4;Dr_wu:fd14a01	Xt_myh4;Dr_smyhc1	0	0.650993	0.650993	Bilateria	Dr_Skeletal muscle	Xt_Skeletal muscle
Xt_myh4;Dr_myhb	Xt_myh4;Dr_smyhc1	0	0.650993	0.650993	Bilateria	Dr_Skeletal muscle	Xt_Skeletal muscle
Xt_myh4;Dr_LOC100537594	Xt_myh4;Dr_smyhc1	0	0.650993	0.650993	Bilateria	Dr_Skeletal muscle	Xt_Skeletal muscle
Xt_myh4;Dr_zgc:66156	Xt_myh4;Dr_smyhc1	0	0.650993	0.650993	Bilateria	Dr_Skeletal muscle	Xt_Skeletal muscle
Dr_smyhc1;Xt_Xetrov90025695m	Dr_smyhc1;Xt_myh4	0	0.650993	0.650993	Bilateria	Dr_Skeletal muscle	Xt_Skeletal muscle
Dr_smyhc1;Xt_myh7	Dr_smyhc1;Xt_myh4	0	0.650993	0.650993	Bilateria	Dr_Skeletal muscle	Xt_Skeletal muscle
Xt_LOC100497157;Dr_tuba1b	Xt_LOC100497157;Dr_LOC795591	0	0.650625	0.650625	Bilateria
Xt_LOC100497157;Dr_tuba2	Xt_LOC100497157;Dr_LOC795591	0	0.650625	0.650625	Bilateria
Xt_LOC100497157;Dr_tuba8l4	Xt_LOC100497157;Dr_LOC795591	0	0.650625	0.650625	Bilateria
Xt_LOC100497157;Dr_si:ch73-199e17.1	Xt_LOC100497157;Dr_LOC795591	0	0.650625	0.650625	Bilateria
Xt_LOC100497157;Dr_tuba8l3	Xt_LOC100497157;Dr_LOC795591	0	0.650625	0.650625	Bilateria
Xt_LOC100497157;Dr_tuba7l	Xt_LOC100497157;Dr_LOC795591	0	0.650625	0.650625	Bilateria
Xt_Xetrov90024523m;Dr_tuba8l3	Xt_Xetrov90024523m;Dr_LOC795591	0	0.650598	0.650598	Bilateria
Xt_Xetrov90024523m;Dr_tuba8l4	Xt_Xetrov90024523m;Dr_LOC795591	0	0.650598	0.650598	Bilateria
Xt_Xetrov90024523m;Dr_tuba7l	Xt_Xetrov90024523m;Dr_LOC795591	0	0.650598	0.650598	Bilateria
Xt_Xetrov90024523m;Dr_tuba2	Xt_Xetrov90024523m;Dr_LOC795591	0	0.650598	0.650598	Bilateria
Xt_Xetrov90024523m;Dr_tuba1b	Xt_Xetrov90024523m;Dr_LOC795591	0	0.650598	0.650598	Bilateria
Xt_Xetrov90024523m;Dr_si:ch73-199e17.1	Xt_Xetrov90024523m;Dr_LOC795591	0	0.650598	0.650598	Bilateria
Xt_LOC100490289-like;Dr_tuba1c	Xt_LOC100490289-like;Dr_LOC795591	0.0165735	0.65856	0.641986	Bilateria
Xt_Xetrov90024523m;Dr_tuba1c	Xt_Xetrov90024523m;Dr_LOC795591	0.0113409	0.650598	0.639257	Bilateria
Xt_LOC100497157;Dr_tuba1c	Xt_LOC100497157;Dr_LOC795591	0.0156045	0.650625	0.63502	Bilateria
Xt_isl1;Dr_isl1l	Xt_isl1;Dr_isl2b	0	0.62776	0.62776	Bilateria	Dr_Rohon-beard neuron	Xt_Neuron;Xt_Rohon-beard neuron
Xt_LOC100497528;Dr_si:ch73-199e17.1	Xt_LOC100497528;Dr_LOC795591	0	0.617371	0.617371	Bilateria
Xt_LOC100497528;Dr_tuba8l3	Xt_LOC100497528;Dr_LOC795591	0	0.617371	0.617371	Bilateria
Xt_LOC100497528;Dr_tuba2	Xt_LOC100497528;Dr_LOC795591	0	0.617371	0.617371	Bilateria
Xt_LOC100497528;Dr_tuba7l	Xt_LOC100497528;Dr_LOC795591	0	0.617371	0.617371	Bilateria
Xt_LOC100497528;Dr_tuba8l4	Xt_LOC100497528;Dr_LOC795591	0	0.617371	0.617371	Bilateria
Xt_gnai1;Dr_gnai3	Xt_gnai1;Dr_gnaia	0	0.612877	0.612877	Bilateria	Dr_Dorsal organizer;Dr_Endoderm;Dr_Involuting marginal zone;Dr_Neuroectoderm;Dr_Non-neural ectoderm;Dr_Notochord;Dr_Presomitic mesoderm	Xt_Endoderm;Xt_Involuting marginal zone;Xt_Neuroectoderm;Xt_Non-neural ectoderm;Xt_Presomitic mesoderm;Xt_Spemann organizer
Dr_LOC103909603;Xt_Xetrov90013012m	Dr_LOC103909603;Xt_capn9	0	0.609339	0.609339	Bilateria	Dr_Ionocyte;Dr_Rare epidermal subtypes;Dr_Secretory epidermal	Xt_Cement gland primordium;Xt_Goblet cell;Xt_Hatching gland;Xt_Ionocyte
Dr_LOC103909603;Xt_LOC101731595	Dr_LOC103909603;Xt_capn9	0	0.609339	0.609339	Bilateria	Dr_Ionocyte;Dr_Rare epidermal subtypes;Dr_Secretory epidermal	Xt_Cement gland primordium;Xt_Goblet cell;Xt_Hatching gland;Xt_Ionocyte
Dr_LOC103909603;Xt_LOC100497284-like	Dr_LOC103909603;Xt_capn9	0	0.609339	0.609339	Bilateria	Dr_Ionocyte;Dr_Rare epidermal subtypes;Dr_Secretory epidermal	Xt_Cement gland primordium;Xt_Goblet cell;Xt_Hatching gland;Xt_Ionocyte
Dr_LOC103909603;Xt_capn2	Dr_LOC103909603;Xt_capn9	0	0.609339	0.609339	Bilateria	Dr_Ionocyte;Dr_Rare epidermal subtypes;Dr_Secretory epidermal	Xt_Cement gland primordium;Xt_Goblet cell;Xt_Hatching gland;Xt_Ionocyte
Dr_LOC103909603;Xt_LOC101730581	Dr_LOC103909603;Xt_capn9	0	0.609339	0.609339	Bilateria	Dr_Ionocyte;Dr_Rare epidermal subtypes;Dr_Secretory epidermal	Xt_Cement gland primordium;Xt_Goblet cell;Xt_Hatching gland;Xt_Ionocyte
Dr_LOC103909603;Xt_capn8	Dr_LOC103909603;Xt_capn9	0	0.609339	0.609339	Bilateria	Dr_Ionocyte;Dr_Rare epidermal subtypes;Dr_Secretory epidermal	Xt_Cement gland primordium;Xt_Goblet cell;Xt_Hatching gland;Xt_Ionocyte
Dr_srsf5a;Xt_krt5.1-like.2	Dr_srsf5a;Xt_srsf6	0	0.608072	0.608072	Bilateria	Dr_Dorsal organizer;Dr_Endoderm;Dr_Involuting marginal zone;Dr_Neuroectoderm;Dr_Non-neural ectoderm	Xt_Endoderm;Xt_Involuting marginal zone;Xt_Neuroectoderm;Xt_Non-neural ectoderm;Xt_Spemann organizer
Xt_gata2;Dr_gata2b	Xt_gata2;Dr_gata3	0	0.601593	0.601593	Bilateria	Dr_Epidermal progenitor;Dr_Ionocyte;Dr_Non-neural ectoderm;Dr_Placodal area;Dr_Rare epidermal subtypes;Dr_Secretory epidermal	Xt_Cement gland primordium;Xt_Epidermal progenitor;Xt_Goblet cell;Xt_Ionocyte;Xt_Non-neural ectoderm;Xt_Placodal area
Xt_LOC100490289-like;Dr_tuba1a	Xt_LOC100490289-like;Dr_LOC795591	0.0633228	0.65856	0.595237	Bilateria
Xt_myh8-like;Dr_LOC100537594	Xt_myh8-like;Dr_smyhc1	0	0.593599	0.593599	Bilateria	Dr_Skeletal muscle	Xt_Skeletal muscle
Xt_myh8-like;Dr_wu:fd14a01	Xt_myh8-like;Dr_smyhc1	0	0.593599	0.593599	Bilateria	Dr_Skeletal muscle	Xt_Skeletal muscle
Dr_smyhc1;Xt_myh7	Dr_smyhc1;Xt_myh8-like	0	0.593599	0.593599	Bilateria	Dr_Skeletal muscle	Xt_Skeletal muscle
Xt_myh8-like;Dr_zgc:66156	Xt_myh8-like;Dr_smyhc1	0	0.593599	0.593599	Bilateria	Dr_Skeletal muscle	Xt_Skeletal muscle
Xt_myh8-like;Dr_myhb	Xt_myh8-like;Dr_smyhc1	0	0.593599	0.593599	Bilateria	Dr_Skeletal muscle	Xt_Skeletal muscle
Dr_smyhc1;Xt_Xetrov90025695m	Dr_smyhc1;Xt_myh8-like	0	0.593599	0.593599	Bilateria	Dr_Skeletal muscle	Xt_Skeletal muscle
Dr_smyhc1;Xt_myh6	Dr_smyhc1;Xt_myh8-like	0	0.593599	0.593599	Bilateria	Dr_Skeletal muscle	Xt_Skeletal muscle
Xt_Xetrov90024523m;Dr_tuba1a	Xt_Xetrov90024523m;Dr_LOC795591	0.0570751	0.650598	0.593523	Bilateria
Xt_LOC100497157;Dr_tuba1a	Xt_LOC100497157;Dr_LOC795591	0.0623103	0.650625	0.588314	Bilateria
Xt_LOC100497528;Dr_tuba1b	Xt_LOC100497528;Dr_LOC795591	0.0299417	0.617371	0.587429	Bilateria
Dr_itga6b;Xt_itga6	Dr_itga6b;Xt_itga3	0.00364089	0.589873	0.586232	Bilateria	Dr_Epidermal progenitor;Dr_Placodal area	Xt_Epidermal progenitor;Xt_Placodal area
Dr_elovl1b;Xt_elovl1	Dr_elovl1b;Xt_elovl7	0	0.574335	0.574335	Bilateria	Dr_Endoderm;Dr_Ionocyte;Dr_Rare epidermal subtypes	Xt_Goblet cell;Xt_Hatching gland;Xt_Ionocyte;Xt_Small secretory cells
Xt_gnai1;Dr_gnai1	Xt_gnai1;Dr_gnaia	0.0415895	0.612877	0.571288	Bilateria	Dr_Dorsal organizer;Dr_Endoderm;Dr_Involuting marginal zone;Dr_Neuroectoderm;Dr_Non-neural ectoderm;Dr_Notochord;Dr_Presomitic mesoderm	Xt_Endoderm;Xt_Involuting marginal zone;Xt_Neuroectoderm;Xt_Non-neural ectoderm;Xt_Presomitic mesoderm;Xt_Spemann organizer
Xt_LOC100497528;Dr_tuba1c	Xt_LOC100497528;Dr_LOC795591	0.0470486	0.617371	0.570322	Bilateria
Xt_myh4;Dr_zgc:66156	Xt_myh4;Dr_LOC103909185	0	0.549171	0.549171	Bilateria
Dr_LOC103909185;Xt_myh7	Dr_LOC103909185;Xt_myh4	0	0.549171	0.549171	Bilateria
Dr_LOC103909185;Xt_myh6	Dr_LOC103909185;Xt_myh4	0	0.549171	0.549171	Bilateria
Xt_myh4;Dr_wu:fd14a01	Xt_myh4;Dr_LOC103909185	0	0.549171	0.549171	Bilateria
Dr_LOC103909185;Xt_Xetrov90025695m	Dr_LOC103909185;Xt_myh4	0	0.549171	0.549171	Bilateria
Xt_myh4;Dr_myhb	Xt_myh4;Dr_LOC103909185	0	0.549171	0.549171	Bilateria
Xt_myh4;Dr_LOC100537594	Xt_myh4;Dr_LOC103909185	0	0.549171	0.549171	Bilateria
Dr_smyhc2;Xt_myh7	Dr_smyhc2;Xt_myh4	0	0.544373	0.544373	Bilateria
Dr_smyhc2;Xt_Xetrov90025695m	Dr_smyhc2;Xt_myh4	0	0.544373	0.544373	Bilateria
Xt_myh4;Dr_LOC100537594	Xt_myh4;Dr_smyhc2	0	0.544373	0.544373	Bilateria
Xt_myh4;Dr_myhb	Xt_myh4;Dr_smyhc2	0	0.544373	0.544373	Bilateria
Xt_myh4;Dr_wu:fd14a01	Xt_myh4;Dr_smyhc2	0	0.544373	0.544373	Bilateria
Xt_myh4;Dr_zgc:66156	Xt_myh4;Dr_smyhc2	0	0.544373	0.544373	Bilateria
Dr_smyhc2;Xt_myh6	Dr_smyhc2;Xt_myh4	0	0.544373	0.544373	Bilateria
Xt_zic1;Dr_LOC103910057	Xt_zic1;Dr_zic2b	0	0.543995	0.543995	Bilateria	Dr_Neuroectoderm;Dr_Tailbud	Xt_Hindbrain;Xt_Neuroectoderm
Xt_capn1-like.1;Dr_si:dkeyp-50d11.2	Xt_capn1-like.1;Dr_capn2l	0	0.526804	0.526804	Bilateria	Dr_Ionocyte;Dr_Rare epidermal subtypes;Dr_Secretory epidermal	Xt_Cement gland primordium;Xt_Goblet cell;Xt_Hatching gland;Xt_Ionocyte;Xt_Small secretory cells
Dr_capn2l;Xt_LOC101733523	Dr_capn2l;Xt_capn1-like.1	0	0.526804	0.526804	Bilateria	Dr_Ionocyte;Dr_Rare epidermal subtypes;Dr_Secretory epidermal	Xt_Cement gland primordium;Xt_Goblet cell;Xt_Hatching gland;Xt_Ionocyte;Xt_Small secretory cells
Dr_capn2l;Xt_capn2.2	Dr_capn2l;Xt_capn1-like.1	0	0.526804	0.526804	Bilateria	Dr_Ionocyte;Dr_Rare epidermal subtypes;Dr_Secretory epidermal	Xt_Cement gland primordium;Xt_Goblet cell;Xt_Hatching gland;Xt_Ionocyte;Xt_Small secretory cells
Xt_capn1-like.1;Dr_capn1a	Xt_capn1-like.1;Dr_capn2l	0	0.526804	0.526804	Bilateria	Dr_Ionocyte;Dr_Rare epidermal subtypes;Dr_Secretory epidermal	Xt_Cement gland primordium;Xt_Goblet cell;Xt_Hatching gland;Xt_Ionocyte;Xt_Small secretory cells
Xt_capn1-like.1;Dr_zgc:55262	Xt_capn1-like.1;Dr_capn2l	0	0.526804	0.526804	Bilateria	Dr_Ionocyte;Dr_Rare epidermal subtypes;Dr_Secretory epidermal	Xt_Cement gland primordium;Xt_Goblet cell;Xt_Hatching gland;Xt_Ionocyte;Xt_Small secretory cells
Xt_LOC100497528;Dr_tuba1a	Xt_LOC100497528;Dr_LOC795591	0.0915847	0.617371	0.525786	Bilateria
Dr_gpm6aa;Xt_gpm6a	Dr_gpm6aa;Xt_gpm6b-like	0	0.506898	0.506898	Bilateria	Dr_Forebrain/midbrain;Dr_Hindbrain;Dr_Neuron;Dr_Optic	Xt_Eye primordium;Xt_Forebrain/midbrain;Xt_Hindbrain;Xt_Neuron;Xt_Optic
Xt_gpm6b-like;Dr_gpm6ba	Xt_gpm6b-like;Dr_gpm6aa	0	0.506898	0.506898	Bilateria	Dr_Forebrain/midbrain;Dr_Hindbrain;Dr_Neuron;Dr_Optic	Xt_Eye primordium;Xt_Forebrain/midbrain;Xt_Hindbrain;Xt_Neuron;Xt_Optic
Xt_gpm6b-like;Dr_gpm6bb	Xt_gpm6b-like;Dr_gpm6aa	0	0.506898	0.506898	Bilateria	Dr_Forebrain/midbrain;Dr_Hindbrain;Dr_Neuron;Dr_Optic	Xt_Eye primordium;Xt_Forebrain/midbrain;Xt_Hindbrain;Xt_Neuron;Xt_Optic
Dr_LOC103909185;Xt_myh7	Dr_LOC103909185;Xt_myh8-like	0	0.506759	0.506759	Bilateria
Xt_myh8-like;Dr_LOC100537594	Xt_myh8-like;Dr_LOC103909185	0	0.506759	0.506759	Bilateria
Xt_myh8-like;Dr_zgc:66156	Xt_myh8-like;Dr_LOC103909185	0	0.506759	0.506759	Bilateria
Xt_myh8-like;Dr_myhb	Xt_myh8-like;Dr_LOC103909185	0	0.506759	0.506759	Bilateria
Dr_LOC103909185;Xt_myh6	Dr_LOC103909185;Xt_myh8-like	0	0.506759	0.506759	Bilateria
Xt_myh8-like;Dr_wu:fd14a01	Xt_myh8-like;Dr_LOC103909185	0	0.506759	0.506759	Bilateria
Dr_LOC103909185;Xt_Xetrov90025695m	Dr_LOC103909185;Xt_myh8-like	0	0.506759	0.506759	Bilateria
Dr_vmhc;Xt_myh6	Dr_vmhc;Xt_LOC101734799	0	0.505598	0.505598	Bilateria
Dr_vmhc;Xt_Xetrov90025695m	Dr_vmhc;Xt_LOC101734799	0	0.505598	0.505598	Bilateria
Xt_LOC101734799;Dr_zgc:66156	Xt_LOC101734799;Dr_vmhc	0	0.505598	0.505598	Bilateria
Xt_LOC101734799;Dr_wu:fd14a01	Xt_LOC101734799;Dr_vmhc	0	0.505598	0.505598	Bilateria
Dr_vmhc;Xt_myh7	Dr_vmhc;Xt_LOC101734799	0	0.505598	0.505598	Bilateria
Xt_LOC101734799;Dr_myhb	Xt_LOC101734799;Dr_vmhc	0	0.505598	0.505598	Bilateria
Xt_LOC101734799;Dr_LOC100537594	Xt_LOC101734799;Dr_vmhc	0	0.505598	0.505598	Bilateria
Dr_map1aa;Xt_map1a-like.1	Dr_map1aa;Xt_map1b	0	0.505526	0.505526	Bilateria	Dr_Neuron;Dr_Rohon-beard neuron	Xt_Neuron;Xt_Rohon-beard neuron
Xt_myh8-like;Dr_wu:fd14a01	Xt_myh8-like;Dr_smyhc2	0	0.50353	0.50353	Bilateria
Xt_myh8-like;Dr_LOC100537594	Xt_myh8-like;Dr_smyhc2	0	0.50353	0.50353	Bilateria
Xt_myh8-like;Dr_zgc:66156	Xt_myh8-like;Dr_smyhc2	0	0.50353	0.50353	Bilateria
Xt_myh8-like;Dr_myhb	Xt_myh8-like;Dr_smyhc2	0	0.50353	0.50353	Bilateria
Dr_smyhc2;Xt_myh7	Dr_smyhc2;Xt_myh8-like	0	0.50353	0.50353	Bilateria
Dr_smyhc2;Xt_myh6	Dr_smyhc2;Xt_myh8-like	0	0.50353	0.50353	Bilateria
Dr_smyhc2;Xt_Xetrov90025695m	Dr_smyhc2;Xt_myh8-like	0	0.50353	0.50353	Bilateria
Dr_im:7154332;Xt_comp	Dr_im:7154332;Xt_LOC101732630	0	0.494538	0.494538	Bilateria	Dr_Skeletal muscle	Xt_Skeletal muscle
Dr_capn8;Xt_LOC100497284-like	Dr_capn8;Xt_capn9	0	0.489214	0.489214	Bilateria	Dr_Hatching gland;Dr_Ionocyte;Dr_Rare epidermal subtypes;Dr_Secretory epidermal	Xt_Cement gland primordium;Xt_Goblet cell;Xt_Hatching gland;Xt_Ionocyte
Dr_capn8;Xt_LOC101730581	Dr_capn8;Xt_capn9	0	0.489214	0.489214	Bilateria	Dr_Hatching gland;Dr_Ionocyte;Dr_Rare epidermal subtypes;Dr_Secretory epidermal	Xt_Cement gland primordium;Xt_Goblet cell;Xt_Hatching gland;Xt_Ionocyte
Dr_capn8;Xt_capn2	Dr_capn8;Xt_capn9	0	0.489214	0.489214	Bilateria	Dr_Hatching gland;Dr_Ionocyte;Dr_Rare epidermal subtypes;Dr_Secretory epidermal	Xt_Cement gland primordium;Xt_Goblet cell;Xt_Hatching gland;Xt_Ionocyte
Dr_capn8;Xt_LOC101731595	Dr_capn8;Xt_capn9	0	0.489214	0.489214	Bilateria	Dr_Hatching gland;Dr_Ionocyte;Dr_Rare epidermal subtypes;Dr_Secretory epidermal	Xt_Cement gland primordium;Xt_Goblet cell;Xt_Hatching gland;Xt_Ionocyte
Dr_capn8;Xt_capn8	Dr_capn8;Xt_capn9	0	0.489214	0.489214	Bilateria	Dr_Hatching gland;Dr_Ionocyte;Dr_Rare epidermal subtypes;Dr_Secretory epidermal	Xt_Cement gland primordium;Xt_Goblet cell;Xt_Hatching gland;Xt_Ionocyte
Dr_capn8;Xt_Xetrov90013012m	Dr_capn8;Xt_capn9	0	0.489214	0.489214	Bilateria	Dr_Hatching gland;Dr_Ionocyte;Dr_Rare epidermal subtypes;Dr_Secretory epidermal	Xt_Cement gland primordium;Xt_Goblet cell;Xt_Hatching gland;Xt_Ionocyte
Dr_capn2b;Xt_LOC101733523	Dr_capn2b;Xt_capn1-like.1	0	0.487105	0.487105	Bilateria	Dr_Epidermal progenitor;Dr_Hatching gland;Dr_Ionocyte;Dr_Rare epidermal subtypes;Dr_Secretory epidermal	Xt_Cement gland primordium;Xt_Epidermal progenitor;Xt_Goblet cell;Xt_Hatching gland;Xt_Ionocyte;Xt_Small secretory cells
Xt_capn1-like.1;Dr_zgc:55262	Xt_capn1-like.1;Dr_capn2b	0	0.487105	0.487105	Bilateria	Dr_Epidermal progenitor;Dr_Hatching gland;Dr_Ionocyte;Dr_Rare epidermal subtypes;Dr_Secretory epidermal	Xt_Cement gland primordium;Xt_Epidermal progenitor;Xt_Goblet cell;Xt_Hatching gland;Xt_Ionocyte;Xt_Small secretory cells
Xt_capn1-like.1;Dr_capn1a	Xt_capn1-like.1;Dr_capn2b	0	0.487105	0.487105	Bilateria	Dr_Epidermal progenitor;Dr_Hatching gland;Dr_Ionocyte;Dr_Rare epidermal subtypes;Dr_Secretory epidermal	Xt_Cement gland primordium;Xt_Epidermal progenitor;Xt_Goblet cell;Xt_Hatching gland;Xt_Ionocyte;Xt_Small secretory cells
Xt_capn1-like.1;Dr_si:dkeyp-50d11.2	Xt_capn1-like.1;Dr_capn2b	0	0.487105	0.487105	Bilateria	Dr_Epidermal progenitor;Dr_Hatching gland;Dr_Ionocyte;Dr_Rare epidermal subtypes;Dr_Secretory epidermal	Xt_Cement gland primordium;Xt_Epidermal progenitor;Xt_Goblet cell;Xt_Hatching gland;Xt_Ionocyte;Xt_Small secretory cells
Dr_tyrp1a;Xt_tyrp1	Dr_tyrp1a;Xt_dct	0	0.484809	0.484809	Bilateria
Dr_smyhc1;Xt_myh6	Dr_smyhc1;Xt_myh2	0	0.481107	0.481107	Bilateria	Dr_Skeletal muscle	Xt_Skeletal muscle
Dr_smyhc1;Xt_myh7	Dr_smyhc1;Xt_myh2	0	0.481107	0.481107	Bilateria	Dr_Skeletal muscle	Xt_Skeletal muscle
Xt_myh2;Dr_wu:fd14a01	Xt_myh2;Dr_smyhc1	0	0.481107	0.481107	Bilateria	Dr_Skeletal muscle	Xt_Skeletal muscle
Xt_myh2;Dr_LOC100537594	Xt_myh2;Dr_smyhc1	0	0.481107	0.481107	Bilateria	Dr_Skeletal muscle	Xt_Skeletal muscle
Dr_smyhc1;Xt_Xetrov90025695m	Dr_smyhc1;Xt_myh2	0	0.481107	0.481107	Bilateria	Dr_Skeletal muscle	Xt_Skeletal muscle
Xt_myh2;Dr_myhb	Xt_myh2;Dr_smyhc1	0	0.481107	0.481107	Bilateria	Dr_Skeletal muscle	Xt_Skeletal muscle
Xt_myh2;Dr_zgc:66156	Xt_myh2;Dr_smyhc1	0	0.481107	0.481107	Bilateria	Dr_Skeletal muscle	Xt_Skeletal muscle
Xt_ywhab;Dr_ywhabb	Xt_ywhab;Dr_ywhaqb	0	0.47793	0.47793	Bilateria	Dr_Endothelial;Dr_Epidermal progenitor;Dr_Eye primordium;Dr_Forebrain/midbrain;Dr_Hindbrain;Dr_Intermediate mesoderm;Dr_Ionocyte;Dr_Neural crest;Dr_Neuron;Dr_Placodal area;Dr_Presomitic mesoderm;Dr_Rohon-beard neuron;Dr_Tailbud	Xt_Endothelial;Xt_Epidermal progenitor;Xt_Eye primordium;Xt_Forebrain/midbrain;Xt_Hindbrain;Xt_Ionocyte;Xt_Neural crest;Xt_Neuron;Xt_Optic;Xt_Placodal area;Xt_Presomitic mesoderm;Xt_Rohon-beard neuron
Dr_srsf5a;Xt_krt5.1-like.2	Dr_srsf5a;Xt_srsf5	0	0.457057	0.457057	Bilateria	Dr_Dorsal organizer;Dr_Endoderm;Dr_Involuting marginal zone;Dr_Neuroectoderm;Dr_Non-neural ectoderm	Xt_Endoderm;Xt_Involuting marginal zone;Xt_Neuroectoderm;Xt_Non-neural ectoderm;Xt_Spemann organizer
Xt_srsf5;Dr_srsf5b	Xt_srsf5;Dr_srsf5a	0	0.457057	0.457057	Bilateria	Dr_Dorsal organizer;Dr_Endoderm;Dr_Involuting marginal zone;Dr_Neuroectoderm;Dr_Non-neural ectoderm	Xt_Endoderm;Xt_Involuting marginal zone;Xt_Neuroectoderm;Xt_Non-neural ectoderm;Xt_Spemann organizer
Xt_dnah3;Dr_si:dkey-161j23.4	Xt_dnah3;Dr_dnah12	0	0.456507	0.456507	Bilateria
Dr_si:ch211-165e15.1;Xt_LOC101733559	Dr_si:ch211-165e15.1;Xt_dst	0	0.452918	0.452918	Bilateria	Dr_Skeletal muscle	Xt_Skeletal muscle
Xt_dst;Dr_LOC103908631	Xt_dst;Dr_si:ch211-165e15.1	0	0.452918	0.452918	Bilateria	Dr_Skeletal muscle	Xt_Skeletal muscle
Xt_dst;Dr_dst	Xt_dst;Dr_si:ch211-165e15.1	0	0.452918	0.452918	Bilateria	Dr_Skeletal muscle	Xt_Skeletal muscle
Xt_elovl7;Dr_elovl7a	Xt_elovl7;Dr_elovl1b	0.122966	0.574335	0.451369	Bilateria	Dr_Endoderm;Dr_Ionocyte;Dr_Rare epidermal subtypes	Xt_Goblet cell;Xt_Hatching gland;Xt_Ionocyte;Xt_Small secretory cells
Dr_nono;Xt_nono	Dr_nono;Xt_sfpq	0.185485	0.636602	0.451117	Bilateria	Dr_Dorsal organizer;Dr_Endoderm;Dr_Involuting marginal zone;Dr_Neuroectoderm;Dr_Non-neural ectoderm;Dr_Notochord;Dr_Presomitic mesoderm;Dr_Tailbud	Xt_Endoderm;Xt_Hindbrain;Xt_Involuting marginal zone;Xt_Neuroectoderm;Xt_Non-neural ectoderm;Xt_Spemann organizer;Xt_Tailbud
Xt_capn1-like.1;Dr_capn1b	Xt_capn1-like.1;Dr_capn2l	0.0874022	0.526804	0.439402	Bilateria	Dr_Ionocyte;Dr_Rare epidermal subtypes;Dr_Secretory epidermal	Xt_Cement gland primordium;Xt_Goblet cell;Xt_Hatching gland;Xt_Ionocyte;Xt_Small secretory cells
Xt_capn1-like.1;Dr_capn1a	Xt_capn1-like.1;Dr_capn9	0	0.437913	0.437913	Bilateria	Dr_Ionocyte;Dr_Rare epidermal subtypes	Xt_Goblet cell;Xt_Hatching gland;Xt_Ionocyte;Xt_Small secretory cells
Xt_capn1-like.1;Dr_zgc:55262	Xt_capn1-like.1;Dr_capn9	0	0.437913	0.437913	Bilateria	Dr_Ionocyte;Dr_Rare epidermal subtypes	Xt_Goblet cell;Xt_Hatching gland;Xt_Ionocyte;Xt_Small secretory cells
Xt_capn1-like.1;Dr_si:dkeyp-50d11.2	Xt_capn1-like.1;Dr_capn9	0	0.437913	0.437913	Bilateria	Dr_Ionocyte;Dr_Rare epidermal subtypes	Xt_Goblet cell;Xt_Hatching gland;Xt_Ionocyte;Xt_Small secretory cells
Xt_zeb2;Dr_zeb2b	Xt_zeb2;Dr_zeb2a	0	0.43754	0.43754	Bilateria	Dr_Blood;Dr_Eye primordium;Dr_Forebrain/midbrain;Dr_Hindbrain;Dr_Macrophage;Dr_Neural crest;Dr_Neuron;Dr_Notoplate;Dr_Optic;Dr_Rohon-beard neuron;Dr_Tailbud	Xt_Blood;Xt_Eye primordium;Xt_Forebrain/midbrain;Xt_Hindbrain;Xt_Myeloid progenitors;Xt_Neural crest;Xt_Neuron;Xt_Notoplate;Xt_Optic;Xt_Tailbud
Xt_crmp1;Dr_crmp1	Xt_crmp1;Dr_dpysl2b	0	0.436386	0.436386	Bilateria	Dr_Neuron;Dr_Rohon-beard neuron	Xt_Neuron;Xt_Rohon-beard neuron
Xt_tfap2b;Dr_tfap2b	Xt_tfap2b;Dr_tfap2a	0.0355286	0.46884	0.433311	Bilateria	Dr_Neural crest;Dr_Placodal area	Xt_Neural crest;Xt_Placodal area
Dr_tuba8l4;Xt_LOC100497528	Dr_tuba8l4;Xt_tuba4b	0	0.432882	0.432882	Bilateria	Dr_Endothelial;Dr_Eye primordium;Dr_Forebrain/midbrain;Dr_Hindbrain;Dr_Intermediate mesoderm;Dr_Neural crest;Dr_Optic;Dr_Rare epidermal subtypes;Dr_Tailbud	Xt_Endothelial;Xt_Eye primordium;Xt_Forebrain/midbrain;Xt_Goblet cell;Xt_Hatching gland;Xt_Hindbrain;Xt_Neural crest;Xt_Optic;Xt_Small secretory cells
Dr_tuba8l4;Xt_LOC100497157	Dr_tuba8l4;Xt_tuba4b	0	0.432882	0.432882	Bilateria	Dr_Endothelial;Dr_Eye primordium;Dr_Forebrain/midbrain;Dr_Hindbrain;Dr_Intermediate mesoderm;Dr_Neural crest;Dr_Optic;Dr_Rare epidermal subtypes;Dr_Tailbud	Xt_Endothelial;Xt_Eye primordium;Xt_Forebrain/midbrain;Xt_Goblet cell;Xt_Hatching gland;Xt_Hindbrain;Xt_Neural crest;Xt_Optic;Xt_Small secretory cells
Dr_tuba8l4;Xt_Xetrov90024521m	Dr_tuba8l4;Xt_tuba4b	0	0.432882	0.432882	Bilateria	Dr_Endothelial;Dr_Eye primordium;Dr_Forebrain/midbrain;Dr_Hindbrain;Dr_Intermediate mesoderm;Dr_Neural crest;Dr_Optic;Dr_Rare epidermal subtypes;Dr_Tailbud	Xt_Endothelial;Xt_Eye primordium;Xt_Forebrain/midbrain;Xt_Goblet cell;Xt_Hatching gland;Xt_Hindbrain;Xt_Neural crest;Xt_Optic;Xt_Small secretory cells
Dr_tuba8l4;Xt_LOC100490289-like	Dr_tuba8l4;Xt_tuba4b	0	0.432882	0.432882	Bilateria	Dr_Endothelial;Dr_Eye primordium;Dr_Forebrain/midbrain;Dr_Hindbrain;Dr_Intermediate mesoderm;Dr_Neural crest;Dr_Optic;Dr_Rare epidermal subtypes;Dr_Tailbud	Xt_Endothelial;Xt_Eye primordium;Xt_Forebrain/midbrain;Xt_Goblet cell;Xt_Hatching gland;Xt_Hindbrain;Xt_Neural crest;Xt_Optic;Xt_Small secretory cells
Dr_tuba8l4;Xt_tuba1b	Dr_tuba8l4;Xt_tuba4b	0	0.432882	0.432882	Bilateria	Dr_Endothelial;Dr_Eye primordium;Dr_Forebrain/midbrain;Dr_Hindbrain;Dr_Intermediate mesoderm;Dr_Neural crest;Dr_Optic;Dr_Rare epidermal subtypes;Dr_Tailbud	Xt_Endothelial;Xt_Eye primordium;Xt_Forebrain/midbrain;Xt_Goblet cell;Xt_Hatching gland;Xt_Hindbrain;Xt_Neural crest;Xt_Optic;Xt_Small secretory cells
Dr_tuba8l4;Xt_Xetrov90024523m	Dr_tuba8l4;Xt_tuba4b	0	0.432882	0.432882	Bilateria	Dr_Endothelial;Dr_Eye primordium;Dr_Forebrain/midbrain;Dr_Hindbrain;Dr_Intermediate mesoderm;Dr_Neural crest;Dr_Optic;Dr_Rare epidermal subtypes;Dr_Tailbud	Xt_Endothelial;Xt_Eye primordium;Xt_Forebrain/midbrain;Xt_Goblet cell;Xt_Hatching gland;Xt_Hindbrain;Xt_Neural crest;Xt_Optic;Xt_Small secretory cells
Dr_tuba8l4;Xt_tubal3	Dr_tuba8l4;Xt_tuba4b	0	0.432882	0.432882	Bilateria	Dr_Endothelial;Dr_Eye primordium;Dr_Forebrain/midbrain;Dr_Hindbrain;Dr_Intermediate mesoderm;Dr_Neural crest;Dr_Optic;Dr_Rare epidermal subtypes;Dr_Tailbud	Xt_Endothelial;Xt_Eye primordium;Xt_Forebrain/midbrain;Xt_Goblet cell;Xt_Hatching gland;Xt_Hindbrain;Xt_Neural crest;Xt_Optic;Xt_Small secretory cells
Xt_coro1c;Dr_coro1cb	Xt_coro1c;Dr_coro1a	0	0.425939	0.425939	Bilateria	Dr_Macrophage	Xt_Myeloid progenitors
Dr_st18;Xt_st18	Dr_st18;Xt_myt1	0	0.420241	0.420241	Bilateria	Dr_Neuron	Xt_Neuron
Xt_dpysl2;Dr_dpysl2	Xt_dpysl2;Dr_dpysl3	0	0.415238	0.415238	Bilateria	Dr_Neuron;Dr_Rohon-beard neuron	Xt_Neuron;Xt_Rohon-beard neuron
Dr_zfand5a;Xt_zfand5	Dr_zfand5a;Xt_zfand6	0.0909136	0.505421	0.414507	Bilateria	Dr_Presomitic mesoderm;Dr_Skeletal muscle	Xt_Presomitic mesoderm;Xt_Skeletal muscle
Xt_vill;Dr_vill	Xt_vill;Dr_gsnb	0	0.412704	0.412704	Bilateria	Dr_Ionocyte;Dr_Rare epidermal subtypes;Dr_Secretory epidermal	Xt_Cement gland primordium;Xt_Goblet cell;Xt_Hatching gland;Xt_Ionocyte;Xt_Small secretory cells
Xt_vill;Dr_vil1	Xt_vill;Dr_gsnb	0	0.412704	0.412704	Bilateria	Dr_Ionocyte;Dr_Rare epidermal subtypes;Dr_Secretory epidermal	Xt_Cement gland primordium;Xt_Goblet cell;Xt_Hatching gland;Xt_Ionocyte;Xt_Small secretory cells
Dr_gsnb;Xt_gsn	Dr_gsnb;Xt_vill	0	0.412704	0.412704	Bilateria	Dr_Ionocyte;Dr_Rare epidermal subtypes;Dr_Secretory epidermal	Xt_Cement gland primordium;Xt_Goblet cell;Xt_Hatching gland;Xt_Ionocyte;Xt_Small secretory cells
Dr_gsnb;Xt_Xetrov90026042m	Dr_gsnb;Xt_vill	0	0.412704	0.412704	Bilateria	Dr_Ionocyte;Dr_Rare epidermal subtypes;Dr_Secretory epidermal	Xt_Cement gland primordium;Xt_Goblet cell;Xt_Hatching gland;Xt_Ionocyte;Xt_Small secretory cells
Xt_vill;Dr_avil	Xt_vill;Dr_gsnb	0	0.412704	0.412704	Bilateria	Dr_Ionocyte;Dr_Rare epidermal subtypes;Dr_Secretory epidermal	Xt_Cement gland primordium;Xt_Goblet cell;Xt_Hatching gland;Xt_Ionocyte;Xt_Small secretory cells
Xt_elovl7;Dr_elovl7b	Xt_elovl7;Dr_elovl1b	0.163556	0.574335	0.410779	Bilateria	Dr_Endoderm;Dr_Ionocyte;Dr_Rare epidermal subtypes	Xt_Goblet cell;Xt_Hatching gland;Xt_Ionocyte;Xt_Small secretory cells
Dr_LOC103909603;Xt_LOC100498169	Dr_LOC103909603;Xt_capn1-like.1	0.339528	0.749932	0.410404	Bilateria	Dr_Epidermal progenitor;Dr_Ionocyte;Dr_Placodal area;Dr_Rare epidermal subtypes;Dr_Secretory epidermal	Xt_Cement gland primordium;Xt_Epidermal progenitor;Xt_Goblet cell;Xt_Hatching gland;Xt_Ionocyte;Xt_Small secretory cells
Xt_Xetrov90028118m;Dr_LOC563561	Xt_Xetrov90028118m;Dr_bin1b	0.164667	0.5683	0.403633	Bilateria	Dr_Skeletal muscle	Xt_Skeletal muscle
Dr_pou3f3b;Xt_pou3f3	Dr_pou3f3b;Xt_pou3f2	0	0.400423	0.400423	Bilateria	Dr_Forebrain/midbrain;Dr_Hindbrain	Xt_Hindbrain
Dr_pou3f3b;Xt_pou3f3	Dr_pou3f3b;Xt_pou3f4	0	0.400415	0.400415	Bilateria	Dr_Forebrain/midbrain;Dr_Hindbrain	Xt_Hindbrain;Xt_Pronephric mesenchyme
Xt_capn1-like.1;Dr_capn1b	Xt_capn1-like.1;Dr_capn2b	0.0874022	0.487105	0.399703	Bilateria	Dr_Epidermal progenitor;Dr_Hatching gland;Dr_Ionocyte;Dr_Rare epidermal subtypes;Dr_Secretory epidermal	Xt_Cement gland primordium;Xt_Epidermal progenitor;Xt_Goblet cell;Xt_Hatching gland;Xt_Ionocyte;Xt_Small secretory cells
Dr_smyhc2;Xt_Xetrov90025695m	Dr_smyhc2;Xt_myh2	0	0.391664	0.391664	Bilateria
Xt_myh2;Dr_LOC100537594	Xt_myh2;Dr_smyhc2	0	0.391664	0.391664	Bilateria
Dr_smyhc2;Xt_myh6	Dr_smyhc2;Xt_myh2	0	0.391664	0.391664	Bilateria
Xt_myh2;Dr_wu:fd14a01	Xt_myh2;Dr_smyhc2	0	0.391664	0.391664	Bilateria
Xt_myh2;Dr_zgc:66156	Xt_myh2;Dr_smyhc2	0	0.391664	0.391664	Bilateria
Dr_smyhc2;Xt_myh7	Dr_smyhc2;Xt_myh2	0	0.391664	0.391664	Bilateria
Xt_myh2;Dr_myhb	Xt_myh2;Dr_smyhc2	0	0.391664	0.391664	Bilateria
Dr_LOC103909185;Xt_Xetrov90025695m	Dr_LOC103909185;Xt_myh2	0	0.391575	0.391575	Bilateria
Xt_myh2;Dr_zgc:66156	Xt_myh2;Dr_LOC103909185	0	0.391575	0.391575	Bilateria
Xt_myh2;Dr_wu:fd14a01	Xt_myh2;Dr_LOC103909185	0	0.391575	0.391575	Bilateria
Dr_LOC103909185;Xt_myh6	Dr_LOC103909185;Xt_myh2	0	0.391575	0.391575	Bilateria
Xt_myh2;Dr_myhb	Xt_myh2;Dr_LOC103909185	0	0.391575	0.391575	Bilateria
Xt_myh2;Dr_LOC100537594	Xt_myh2;Dr_LOC103909185	0	0.391575	0.391575	Bilateria
Dr_LOC103909185;Xt_myh7	Dr_LOC103909185;Xt_myh2	0	0.391575	0.391575	Bilateria
Xt_zic1;Dr_zic1	Xt_zic1;Dr_zic2b	0.153717	0.543995	0.390277	Bilateria	Dr_Neuroectoderm;Dr_Tailbud	Xt_Hindbrain;Xt_Neuroectoderm
Xt_dnah7;Dr_dnah7	Xt_dnah7;Dr_dnah12	0.0359341	0.423151	0.387217	Bilateria
Xt_pfkfb2;Dr_LOC564852	Xt_pfkfb2;Dr_pfkfb4l	0	0.380448	0.380448	Bilateria	Dr_Involuting marginal zone;Dr_Neuroectoderm;Dr_Non-neural ectoderm	Xt_Involuting marginal zone;Xt_Neuroectoderm;Xt_Non-neural ectoderm
Xt_zfand6;Dr_zfand6	Xt_zfand6;Dr_zfand5a	0.131986	0.505421	0.373435	Bilateria	Dr_Presomitic mesoderm;Dr_Skeletal muscle	Xt_Presomitic mesoderm;Xt_Skeletal muscle
Xt_pfkfb2;Dr_LOC564852	Xt_pfkfb2;Dr_pfkfb4b	0	0.363356	0.363356	Bilateria	Dr_Involuting marginal zone;Dr_Neuroectoderm;Dr_Non-neural ectoderm	Xt_Involuting marginal zone;Xt_Neuroectoderm;Xt_Non-neural ectoderm
Dr_pou3f1;Xt_pou3f1	Dr_pou3f1;Xt_pou3f2	0.0260652	0.38467	0.358605	Bilateria	Dr_Forebrain/midbrain;Dr_Hindbrain	Xt_Hindbrain
Xt_abhd17b;Dr_abhd17b	Xt_abhd17b;Dr_abhd17c	0	0.351881	0.351881	Bilateria	Dr_Blastula	Xt_Blastula
Xt_capn1-like.1;Dr_capn1b	Xt_capn1-like.1;Dr_capn9	0.0874022	0.437913	0.350511	Bilateria	Dr_Ionocyte;Dr_Rare epidermal subtypes	Xt_Goblet cell;Xt_Hatching gland;Xt_Ionocyte;Xt_Small secretory cells
Xt_ywhae;Dr_ywhae1	Xt_ywhae;Dr_ywhaqb	0	0.349562	0.349562	Bilateria	Dr_Endoderm;Dr_Epidermal progenitor;Dr_Eye primordium;Dr_Forebrain/midbrain;Dr_Hindbrain;Dr_Ionocyte;Dr_Neural crest;Dr_Neuron;Dr_Placodal area;Dr_Rare epidermal subtypes;Dr_Rohon-beard neuron;Dr_Tailbud	Xt_Epidermal progenitor;Xt_Eye primordium;Xt_Forebrain/midbrain;Xt_Goblet cell;Xt_Hatching gland;Xt_Hindbrain;Xt_Ionocyte;Xt_Neural crest;Xt_Neuron;Xt_Optic;Xt_Placodal area;Xt_Rohon-beard neuron;Xt_Small secretory cells
Xt_ywhae;Dr_ywhae2	Xt_ywhae;Dr_ywhaqb	0	0.349562	0.349562	Bilateria	Dr_Endoderm;Dr_Epidermal progenitor;Dr_Eye primordium;Dr_Forebrain/midbrain;Dr_Hindbrain;Dr_Ionocyte;Dr_Neural crest;Dr_Neuron;Dr_Placodal area;Dr_Rare epidermal subtypes;Dr_Rohon-beard neuron;Dr_Tailbud	Xt_Epidermal progenitor;Xt_Eye primordium;Xt_Forebrain/midbrain;Xt_Goblet cell;Xt_Hatching gland;Xt_Hindbrain;Xt_Ionocyte;Xt_Neural crest;Xt_Neuron;Xt_Optic;Xt_Placodal area;Xt_Rohon-beard neuron;Xt_Small secretory cells
Xt_myh4;Dr_zgc:66156	Xt_myh4;Dr_LOC101882018	0	0.349258	0.349258	Bilateria
Dr_LOC101882018;Xt_myh7b	Dr_LOC101882018;Xt_myh4	0	0.349258	0.349258	Bilateria
Xt_myh4;Dr_wu:fd14a01	Xt_myh4;Dr_LOC101882018	0	0.349258	0.349258	Bilateria
Xt_myh4;Dr_myhb	Xt_myh4;Dr_LOC101882018	0	0.349258	0.349258	Bilateria
Xt_myh4;Dr_LOC100537594	Xt_myh4;Dr_LOC101882018	0	0.349258	0.349258	Bilateria
Xt_crmp1;Dr_crmp1	Xt_crmp1;Dr_dpysl3	0	0.34538	0.34538	Bilateria	Dr_Neuron;Dr_Rohon-beard neuron	Xt_Neuron;Xt_Rohon-beard neuron
Xt_ralb;Dr_kras	Xt_ralb;Dr_zgc:55558	0.0474232	0.391409	0.343986	Bilateria	Dr_Blastula;Dr_Involuting marginal zone;Dr_Neuroectoderm	Xt_Blastula;Xt_Involuting marginal zone;Xt_Neuroectoderm;Xt_Non-neural ectoderm
Dr_snrpa;Xt_snrpa	Dr_snrpa;Xt_snrpb2	0.240251	0.583359	0.343108	Bilateria	Dr_Dorsal organizer;Dr_Endoderm;Dr_Involuting marginal zone;Dr_Neuroectoderm;Dr_Non-neural ectoderm;Dr_Notochord;Dr_Tailbud	Xt_Endoderm;Xt_Hindbrain;Xt_Involuting marginal zone;Xt_Neuroectoderm;Xt_Non-neural ectoderm;Xt_Spemann organizer;Xt_Tailbud
Dr_prkcda;Xt_Xetrov90023502m	Dr_prkcda;Xt_prkch	0	0.340288	0.340288	Bilateria	Dr_Blastula	Xt_Blastula
Dr_prkcda;Xt_Xetrov90002109m	Dr_prkcda;Xt_prkch	0	0.340288	0.340288	Bilateria	Dr_Blastula	Xt_Blastula
Dr_prkcda;Xt_Xetrov90019023m	Dr_prkcda;Xt_prkch	0	0.340288	0.340288	Bilateria	Dr_Blastula	Xt_Blastula
Dr_prkcda;Xt_Xetrov90023476m	Dr_prkcda;Xt_prkch	0	0.340288	0.340288	Bilateria	Dr_Blastula	Xt_Blastula
Dr_prkcda;Xt_Xetrov90023497m	Dr_prkcda;Xt_prkch	0	0.340288	0.340288	Bilateria	Dr_Blastula	Xt_Blastula
Dr_prkcda;Xt_Xetrov90005842m	Dr_prkcda;Xt_prkch	0	0.340288	0.340288	Bilateria	Dr_Blastula	Xt_Blastula
Dr_prkcda;Xt_Xetrov90002766m	Dr_prkcda;Xt_prkch	0	0.340288	0.340288	Bilateria	Dr_Blastula	Xt_Blastula
Dr_prkcda;Xt_Xetrov90004327m	Dr_prkcda;Xt_prkch	0	0.340288	0.340288	Bilateria	Dr_Blastula	Xt_Blastula
Dr_prkcda;Xt_Xetrov90004318m	Dr_prkcda;Xt_prkch	0	0.340288	0.340288	Bilateria	Dr_Blastula	Xt_Blastula
Dr_prkcda;Xt_Xetrov90004617m	Dr_prkcda;Xt_prkch	0	0.340288	0.340288	Bilateria	Dr_Blastula	Xt_Blastula
Dr_prkcda;Xt_LOC101732896	Dr_prkcda;Xt_prkch	0	0.340288	0.340288	Bilateria	Dr_Blastula	Xt_Blastula
Dr_prkcda;Xt_Xetrov90017868m	Dr_prkcda;Xt_prkch	0	0.340288	0.340288	Bilateria	Dr_Blastula	Xt_Blastula
Dr_prkcda;Xt_Xetrov90017710m	Dr_prkcda;Xt_prkch	0	0.340288	0.340288	Bilateria	Dr_Blastula	Xt_Blastula
Dr_prkcda;Xt_LOC101730567	Dr_prkcda;Xt_prkch	0	0.340288	0.340288	Bilateria	Dr_Blastula	Xt_Blastula
Dr_prkcda;Xt_Xetrov90010288m	Dr_prkcda;Xt_prkch	0	0.340288	0.340288	Bilateria	Dr_Blastula	Xt_Blastula
Dr_prkcda;Xt_Xetrov90007614m	Dr_prkcda;Xt_prkch	0	0.340288	0.340288	Bilateria	Dr_Blastula	Xt_Blastula
Dr_prkcda;Xt_Xetrov90000581m	Dr_prkcda;Xt_prkch	0	0.340288	0.340288	Bilateria	Dr_Blastula	Xt_Blastula
Dr_prkcda;Xt_Xetrov90000580m	Dr_prkcda;Xt_prkch	0	0.340288	0.340288	Bilateria	Dr_Blastula	Xt_Blastula
Dr_prkcda;Xt_LOC101735024	Dr_prkcda;Xt_prkch	0	0.340288	0.340288	Bilateria	Dr_Blastula	Xt_Blastula
Dr_prkcda;Xt_Xetrov90005900m	Dr_prkcda;Xt_prkch	0	0.340288	0.340288	Bilateria	Dr_Blastula	Xt_Blastula
Dr_prkcda;Xt_Xetrov90005898m	Dr_prkcda;Xt_prkch	0	0.340288	0.340288	Bilateria	Dr_Blastula	Xt_Blastula
Dr_prkcda;Xt_LOC101731094	Dr_prkcda;Xt_prkch	0	0.340288	0.340288	Bilateria	Dr_Blastula	Xt_Blastula
Dr_prkcda;Xt_LOC101731223	Dr_prkcda;Xt_prkch	0	0.340288	0.340288	Bilateria	Dr_Blastula	Xt_Blastula
Dr_prkcda;Xt_LOC101731335	Dr_prkcda;Xt_prkch	0	0.340288	0.340288	Bilateria	Dr_Blastula	Xt_Blastula
Dr_prkcda;Xt_LOC101731388	Dr_prkcda;Xt_prkch	0	0.340288	0.340288	Bilateria	Dr_Blastula	Xt_Blastula
Dr_prkcda;Xt_LOC101734963	Dr_prkcda;Xt_prkch	0	0.340288	0.340288	Bilateria	Dr_Blastula	Xt_Blastula
Dr_prkcda;Xt_LOC101734907	Dr_prkcda;Xt_prkch	0	0.340288	0.340288	Bilateria	Dr_Blastula	Xt_Blastula
Dr_prkcda;Xt_LOC101734839	Dr_prkcda;Xt_prkch	0	0.340288	0.340288	Bilateria	Dr_Blastula	Xt_Blastula
Dr_prkcda;Xt_LOC101731405	Dr_prkcda;Xt_prkch	0	0.340288	0.340288	Bilateria	Dr_Blastula	Xt_Blastula
Dr_prkcda;Xt_LOC101731442	Dr_prkcda;Xt_prkch	0	0.340288	0.340288	Bilateria	Dr_Blastula	Xt_Blastula
Dr_prkcda;Xt_LOC101734833	Dr_prkcda;Xt_prkch	0	0.340288	0.340288	Bilateria	Dr_Blastula	Xt_Blastula
Dr_prkcda;Xt_LOC101734681	Dr_prkcda;Xt_prkch	0	0.340288	0.340288	Bilateria	Dr_Blastula	Xt_Blastula
Dr_prkcda;Xt_LOC101731454	Dr_prkcda;Xt_prkch	0	0.340288	0.340288	Bilateria	Dr_Blastula	Xt_Blastula
Dr_prkcda;Xt_LOC101733236	Dr_prkcda;Xt_prkch	0	0.340288	0.340288	Bilateria	Dr_Blastula	Xt_Blastula
Dr_prkcda;Xt_LOC101732082	Dr_prkcda;Xt_prkch	0	0.340288	0.340288	Bilateria	Dr_Blastula	Xt_Blastula
Dr_prkcda;Xt_LOC101732914	Dr_prkcda;Xt_prkch	0	0.340288	0.340288	Bilateria	Dr_Blastula	Xt_Blastula
Dr_prkcda;Xt_Xetrov90000582m	Dr_prkcda;Xt_prkch	0	0.340288	0.340288	Bilateria	Dr_Blastula	Xt_Blastula
Dr_prkcda;Xt_prkcd	Dr_prkcda;Xt_prkch	0	0.340288	0.340288	Bilateria	Dr_Blastula	Xt_Blastula
Dr_prkcda;Xt_Xetrov90011811m	Dr_prkcda;Xt_prkch	0	0.340288	0.340288	Bilateria	Dr_Blastula	Xt_Blastula
Dr_prkcda;Xt_Xetrov90013280m	Dr_prkcda;Xt_prkch	0	0.340288	0.340288	Bilateria	Dr_Blastula	Xt_Blastula
Dr_prkcda;Xt_Xetrov90023562m	Dr_prkcda;Xt_prkch	0	0.340288	0.340288	Bilateria	Dr_Blastula	Xt_Blastula
Dr_prkcda;Xt_Xetrov90023564m	Dr_prkcda;Xt_prkch	0	0.340288	0.340288	Bilateria	Dr_Blastula	Xt_Blastula
Dr_prkcda;Xt_Xetrov90013473m	Dr_prkcda;Xt_prkch	0	0.340288	0.340288	Bilateria	Dr_Blastula	Xt_Blastula
Dr_prkcda;Xt_Xetrov90023618m	Dr_prkcda;Xt_prkch	0	0.340288	0.340288	Bilateria	Dr_Blastula	Xt_Blastula
Dr_prkcda;Xt_Xetrov90025913m	Dr_prkcda;Xt_prkch	0	0.340288	0.340288	Bilateria	Dr_Blastula	Xt_Blastula
Dr_prkcda;Xt_Xetrov90002011m	Dr_prkcda;Xt_prkch	0	0.340288	0.340288	Bilateria	Dr_Blastula	Xt_Blastula
Dr_prkcda;Xt_Xetrov90026184m	Dr_prkcda;Xt_prkch	0	0.340288	0.340288	Bilateria	Dr_Blastula	Xt_Blastula
Dr_prkcda;Xt_Xetrov90001988m	Dr_prkcda;Xt_prkch	0	0.340288	0.340288	Bilateria	Dr_Blastula	Xt_Blastula
Dr_prkcda;Xt_Xetrov90001985m	Dr_prkcda;Xt_prkch	0	0.340288	0.340288	Bilateria	Dr_Blastula	Xt_Blastula
Dr_prkcda;Xt_Xetrov90001965m	Dr_prkcda;Xt_prkch	0	0.340288	0.340288	Bilateria	Dr_Blastula	Xt_Blastula
Dr_prkcda;Xt_Xetrov90005860m	Dr_prkcda;Xt_prkch	0	0.340288	0.340288	Bilateria	Dr_Blastula	Xt_Blastula
Dr_prkcda;Xt_Xetrov90030508m	Dr_prkcda;Xt_prkch	0	0.340288	0.340288	Bilateria	Dr_Blastula	Xt_Blastula
Dr_prkcda;Xt_Xetrov90000717m	Dr_prkcda;Xt_prkch	0	0.340288	0.340288	Bilateria	Dr_Blastula	Xt_Blastula
Dr_prkcda;Xt_LOC100492960	Dr_prkcda;Xt_prkch	0	0.340288	0.340288	Bilateria	Dr_Blastula	Xt_Blastula
Dr_prkcda;Xt_LOC100494858	Dr_prkcda;Xt_prkch	0	0.340288	0.340288	Bilateria	Dr_Blastula	Xt_Blastula
Dr_prkcda;Xt_LOC100497432	Dr_prkcda;Xt_prkch	0	0.340288	0.340288	Bilateria	Dr_Blastula	Xt_Blastula
Dr_prkcda;Xt_Xetrov90027709m	Dr_prkcda;Xt_prkch	0	0.340288	0.340288	Bilateria	Dr_Blastula	Xt_Blastula
Xt_prkch;Dr_prkchb	Xt_prkch;Dr_prkcda	0	0.340288	0.340288	Bilateria	Dr_Blastula	Xt_Blastula
Dr_prkcda;Xt_LOC101730464	Dr_prkcda;Xt_prkch	0	0.340288	0.340288	Bilateria	Dr_Blastula	Xt_Blastula
Dr_prkcda;Xt_Xetrov90027715m	Dr_prkcda;Xt_prkch	0	0.340288	0.340288	Bilateria	Dr_Blastula	Xt_Blastula
Dr_prkcda;Xt_Xetrov90029917m	Dr_prkcda;Xt_prkch	0	0.340288	0.340288	Bilateria	Dr_Blastula	Xt_Blastula
Dr_prkcda;Xt_Xetrov90013261m	Dr_prkcda;Xt_prkch	0	0.340288	0.340288	Bilateria	Dr_Blastula	Xt_Blastula
Dr_prkcda;Xt_Xetrov90000601m	Dr_prkcda;Xt_prkch	0	0.340288	0.340288	Bilateria	Dr_Blastula	Xt_Blastula
Dr_prkcda;Xt_LOC101731023	Dr_prkcda;Xt_prkch	0	0.340288	0.340288	Bilateria	Dr_Blastula	Xt_Blastula
Dr_prkcda;Xt_Xetrov90023503m	Dr_prkcda;Xt_prkch	0.000150683	0.340288	0.340137	Bilateria	Dr_Blastula	Xt_Blastula
Dr_LOC100329748;Xt_myh6	Dr_LOC100329748;Xt_myh4	0	0.339029	0.339029	Bilateria
Dr_LOC100329748;Xt_myh7	Dr_LOC100329748;Xt_myh4	0	0.339029	0.339029	Bilateria
Xt_myh4;Dr_myhb	Xt_myh4;Dr_LOC100329748	0	0.339029	0.339029	Bilateria
Dr_LOC100329748;Xt_Xetrov90025695m	Dr_LOC100329748;Xt_myh4	0	0.339029	0.339029	Bilateria
Xt_myh4;Dr_wu:fd14a01	Xt_myh4;Dr_LOC100329748	0	0.339029	0.339029	Bilateria
Xt_myh4;Dr_zgc:66156	Xt_myh4;Dr_LOC100329748	0	0.339029	0.339029	Bilateria
Xt_myh4;Dr_LOC100537594	Xt_myh4;Dr_LOC100329748	0	0.339029	0.339029	Bilateria
Xt_esco1;Dr_esco1	Xt_esco1;Dr_esco2	0	0.338497	0.338497	Bilateria	Dr_Blastula;Dr_Involuting marginal zone;Dr_Neuroectoderm	Xt_Blastula;Xt_Involuting marginal zone;Xt_Neuroectoderm
Xt_Xetrov90026713m;Dr_wu:fd14a01	Xt_Xetrov90026713m;Dr_smyhc1	0	0.331156	0.331156	Bilateria	Dr_Skeletal muscle	Xt_Skeletal muscle
Xt_Xetrov90026713m;Dr_LOC100537594	Xt_Xetrov90026713m;Dr_smyhc1	0	0.331156	0.331156	Bilateria	Dr_Skeletal muscle	Xt_Skeletal muscle
Dr_smyhc1;Xt_Xetrov90025695m	Dr_smyhc1;Xt_Xetrov90026713m	0	0.331156	0.331156	Bilateria	Dr_Skeletal muscle	Xt_Skeletal muscle
Xt_Xetrov90026713m;Dr_myhb	Xt_Xetrov90026713m;Dr_smyhc1	0	0.331156	0.331156	Bilateria	Dr_Skeletal muscle	Xt_Skeletal muscle
Dr_smyhc1;Xt_myh6	Dr_smyhc1;Xt_Xetrov90026713m	0	0.331156	0.331156	Bilateria	Dr_Skeletal muscle	Xt_Skeletal muscle
Xt_Xetrov90026713m;Dr_zgc:66156	Xt_Xetrov90026713m;Dr_smyhc1	0	0.331156	0.331156	Bilateria	Dr_Skeletal muscle	Xt_Skeletal muscle
Dr_smyhc1;Xt_myh7	Dr_smyhc1;Xt_Xetrov90026713m	0	0.331156	0.331156	Bilateria	Dr_Skeletal muscle	Xt_Skeletal muscle
Dr_postnb;Xt_postn	Dr_postnb;Xt_LOC101733581	0	0.327155	0.327155	Bilateria
Dr_six2a;Xt_six2	Dr_six2a;Xt_six1	0	0.324166	0.324166	Bilateria	Dr_Intermediate mesoderm;Dr_Otic placode;Dr_Placodal area	Xt_Endothelial;Xt_Otic placode;Xt_Placodal area
Xt_lamp1;Dr_lamp1	Xt_lamp1;Dr_LOC563328	0	0.321127	0.321127	Bilateria	Dr_Blastula;Dr_Notochord	Xt_Blastula;Xt_Notochord;Xt_Spemann organizer
Dr_pou3f1;Xt_pou3f1	Dr_pou3f1;Xt_pou3f4	0.0260652	0.345692	0.319627	Bilateria	Dr_Forebrain/midbrain;Dr_Hindbrain	Xt_Hindbrain;Xt_Pronephric mesenchyme
Dr_pfkfb4l;Xt_LOC100488795-like	Dr_pfkfb4l;Xt_pfkfb2	0.0610711	0.380448	0.319377	Bilateria	Dr_Involuting marginal zone;Dr_Neuroectoderm;Dr_Non-neural ectoderm	Xt_Involuting marginal zone;Xt_Neuroectoderm;Xt_Non-neural ectoderm
Xt_calr;Dr_LOC101883687	Xt_calr;Dr_calr	0.0851388	0.404009	0.31887	Bilateria	Dr_Dorsal organizer;Dr_Epidermal progenitor;Dr_Hatching gland;Dr_Intermediate mesoderm;Dr_Macrophage;Dr_Neuron;Dr_Notochord;Dr_Notoplate;Dr_Placodal area;Dr_Rohon-beard neuron;Dr_Secretory epidermal	Xt_Cement gland primordium;Xt_Epidermal progenitor;Xt_Hatching gland;Xt_Myeloid progenitors;Xt_Neuron;Xt_Notochord;Xt_Notoplate;Xt_Placodal area;Xt_Rohon-beard neuron;Xt_Spemann organizer
Dr_LOC101882018;Xt_myh7b	Dr_LOC101882018;Xt_myh8-like	0	0.317665	0.317665	Bilateria
Xt_myh8-like;Dr_zgc:66156	Xt_myh8-like;Dr_LOC101882018	0	0.317665	0.317665	Bilateria
Xt_myh8-like;Dr_wu:fd14a01	Xt_myh8-like;Dr_LOC101882018	0	0.317665	0.317665	Bilateria
Xt_myh8-like;Dr_myhb	Xt_myh8-like;Dr_LOC101882018	0	0.317665	0.317665	Bilateria
Xt_myh8-like;Dr_LOC100537594	Xt_myh8-like;Dr_LOC101882018	0	0.317665	0.317665	Bilateria
Xt_eml1;Dr_eml2	Xt_eml1;Dr_eml4	0	0.317645	0.317645	Bilateria	Dr_Involuting marginal zone;Dr_Neuroectoderm;Dr_Non-neural ectoderm	Xt_Involuting marginal zone;Xt_Neuroectoderm;Xt_Non-neural ectoderm
Xt_LOC101733581;Dr_tgfbi	Xt_LOC101733581;Dr_postnb	0.0101244	0.327155	0.31703	Bilateria
Xt_myh8-like;Dr_LOC100537594	Xt_myh8-like;Dr_LOC100329748	0	0.31592	0.31592	Bilateria
Dr_LOC100329748;Xt_myh7	Dr_LOC100329748;Xt_myh8-like	0	0.31592	0.31592	Bilateria
Xt_myh8-like;Dr_zgc:66156	Xt_myh8-like;Dr_LOC100329748	0	0.31592	0.31592	Bilateria
Xt_myh8-like;Dr_wu:fd14a01	Xt_myh8-like;Dr_LOC100329748	0	0.31592	0.31592	Bilateria
Xt_myh8-like;Dr_myhb	Xt_myh8-like;Dr_LOC100329748	0	0.31592	0.31592	Bilateria
Dr_LOC100329748;Xt_myh6	Dr_LOC100329748;Xt_myh8-like	0	0.31592	0.31592	Bilateria
Dr_LOC100329748;Xt_Xetrov90025695m	Dr_LOC100329748;Xt_myh8-like	0	0.31592	0.31592	Bilateria
Dr_pfkfb4b;Xt_LOC100488795-like	Dr_pfkfb4b;Xt_pfkfb2	0.0479214	0.363356	0.315435	Bilateria	Dr_Involuting marginal zone;Dr_Neuroectoderm;Dr_Non-neural ectoderm	Xt_Involuting marginal zone;Xt_Neuroectoderm;Xt_Non-neural ectoderm
Dr_arf5;Xt_arf4	Dr_arf5;Xt_arf5	0	0.313294	0.313294	Bilateria	Dr_Epidermal progenitor;Dr_Neuroectoderm;Dr_Non-neural ectoderm	Xt_Epidermal progenitor;Xt_Neuroectoderm;Xt_Non-neural ectoderm
Xt_ywhab;Dr_ywhaba	Xt_ywhab;Dr_ywhaqb	0.167929	0.47793	0.310001	Bilateria	Dr_Endothelial;Dr_Epidermal progenitor;Dr_Eye primordium;Dr_Forebrain/midbrain;Dr_Hindbrain;Dr_Intermediate mesoderm;Dr_Ionocyte;Dr_Neural crest;Dr_Neuron;Dr_Placodal area;Dr_Presomitic mesoderm;Dr_Rohon-beard neuron;Dr_Tailbud	Xt_Endothelial;Xt_Epidermal progenitor;Xt_Eye primordium;Xt_Forebrain/midbrain;Xt_Hindbrain;Xt_Ionocyte;Xt_Neural crest;Xt_Neuron;Xt_Optic;Xt_Placodal area;Xt_Presomitic mesoderm;Xt_Rohon-beard neuron
Xt_scaf8;Dr_LOC103909092	Xt_scaf8;Dr_scaf4a	0	0.309843	0.309843	Bilateria
Dr_isl2b;Xt_isl2	Dr_isl2b;Xt_isl1	0.323476	0.62776	0.304284	Bilateria	Dr_Rohon-beard neuron	Xt_Neuron;Xt_Rohon-beard neuron
Xt_LOC101734799;Dr_wu:fd14a01	Xt_LOC101734799;Dr_vmhcl	0	0.302494	0.302494	Bilateria
Xt_LOC101734799;Dr_LOC100537594	Xt_LOC101734799;Dr_vmhcl	0	0.302494	0.302494	Bilateria
Dr_vmhcl;Xt_Xetrov90025695m	Dr_vmhcl;Xt_LOC101734799	0	0.302494	0.302494	Bilateria
Dr_vmhcl;Xt_myh7	Dr_vmhcl;Xt_LOC101734799	0	0.302494	0.302494	Bilateria
Xt_LOC101734799;Dr_myhb	Xt_LOC101734799;Dr_vmhcl	0	0.302494	0.302494	Bilateria
Xt_LOC101734799;Dr_zgc:66156	Xt_LOC101734799;Dr_vmhcl	0	0.302494	0.302494	Bilateria
Dr_vmhcl;Xt_myh6	Dr_vmhcl;Xt_LOC101734799	0	0.302494	0.302494	Bilateria
Xt_six6;Dr_six6b	Xt_six6;Dr_six3b	0.0378118	0.65071	0.612898	Metazoa	Dr_Eye primordium;Dr_Forebrain/midbrain;Dr_Optic	Xt_Eye primordium;Xt_Optic
Dr_vsx2;Xt_vsx2	Dr_vsx2;Xt_vsx1	0	0.611403	0.611403	Metazoa	Dr_Eye primordium;Dr_Optic	Xt_Eye primordium;Xt_Optic
Xt_six6;Dr_six6a	Xt_six6;Dr_six3b	0.0539919	0.65071	0.596718	Metazoa	Dr_Eye primordium;Dr_Forebrain/midbrain;Dr_Optic	Xt_Eye primordium;Xt_Optic
Xt_vsx1;Dr_vsx1	Xt_vsx1;Dr_vsx2	0.0330863	0.611403	0.578317	Metazoa	Dr_Eye primordium;Dr_Optic	Xt_Eye primordium;Xt_Optic
Dr_foxf2b;Xt_foxf2	Dr_foxf2b;Xt_foxf1	0	0.526004	0.526004	Metazoa
Xt_myh4;Dr_LOC100537594	Xt_myh4;Dr_myh7bb	0	0.510919	0.510919	Metazoa
Xt_myh4;Dr_zgc:66156	Xt_myh4;Dr_myh7bb	0	0.510919	0.510919	Metazoa
Xt_myh4;Dr_myhb	Xt_myh4;Dr_myh7bb	0	0.510919	0.510919	Metazoa
Xt_myh4;Dr_wu:fd14a01	Xt_myh4;Dr_myh7bb	0	0.510919	0.510919	Metazoa
Xt_matn2;Dr_matn4	Xt_matn2;Dr_zgc:158328	0	0.488733	0.488733	Metazoa	Dr_Notochord	Xt_Notochord
Xt_hmgb2;Dr_hmgb2a	Xt_hmgb2;Dr_hmgb1b	0	0.480663	0.480663	Metazoa	Dr_Eye primordium;Dr_Forebrain/midbrain;Dr_Hindbrain;Dr_Intermediate mesoderm;Dr_Optic;Dr_Tailbud	Xt_Endothelial;Xt_Eye primordium;Xt_Forebrain/midbrain;Xt_Hindbrain;Xt_Intermediate mesoderm;Xt_Optic;Xt_Pronephric mesenchyme;Xt_Tailbud
Xt_myh8-like;Dr_wu:fd14a01	Xt_myh8-like;Dr_myh7bb	0	0.45753	0.45753	Metazoa
Xt_myh8-like;Dr_LOC100537594	Xt_myh8-like;Dr_myh7bb	0	0.45753	0.45753	Metazoa
Xt_myh8-like;Dr_myhb	Xt_myh8-like;Dr_myh7bb	0	0.45753	0.45753	Metazoa
Xt_myh8-like;Dr_zgc:66156	Xt_myh8-like;Dr_myh7bb	0	0.45753	0.45753	Metazoa
Xt_cdx1;Dr_cdx1b	Xt_cdx1;Dr_cdx4	0	0.43807	0.43807	Metazoa	Dr_Endoderm;Dr_Involuting marginal zone;Dr_Presomitic mesoderm;Dr_Tailbud	Xt_Endoderm;Xt_Involuting marginal zone;Xt_Tailbud
Xt_tekt3;Dr_tekt3	Xt_tekt3;Dr_tekt1	0	0.402116	0.402116	Metazoa
Xt_tgfbr1;Dr_tgfbr1b	Xt_tgfbr1;Dr_acvr1l	0	0.362952	0.362952	Metazoa	Dr_Dorsal organizer;Dr_Endoderm;Dr_Involuting marginal zone;Dr_Neuroectoderm;Dr_Non-neural ectoderm;Dr_Notochord	Xt_Endoderm;Xt_Involuting marginal zone;Xt_Neuroectoderm;Xt_Non-neural ectoderm;Xt_Notochord;Xt_Spemann organizer
Xt_tgfbr1;Dr_tgfbr1a	Xt_tgfbr1;Dr_acvr1l	0	0.362952	0.362952	Metazoa	Dr_Dorsal organizer;Dr_Endoderm;Dr_Involuting marginal zone;Dr_Neuroectoderm;Dr_Non-neural ectoderm;Dr_Notochord	Xt_Endoderm;Xt_Involuting marginal zone;Xt_Neuroectoderm;Xt_Non-neural ectoderm;Xt_Notochord;Xt_Spemann organizer
Xt_nkx2-1;Dr_nkx2.1	Xt_nkx2-1;Dr_nkx2.4b	0.333604	0.675932	0.342328	Metazoa
Xt_myh2;Dr_wu:fd14a01	Xt_myh2;Dr_myh7bb	0	0.341243	0.341243	Metazoa
Xt_myh2;Dr_LOC100537594	Xt_myh2;Dr_myh7bb	0	0.341243	0.341243	Metazoa
Xt_myh2;Dr_myhb	Xt_myh2;Dr_myh7bb	0	0.341243	0.341243	Metazoa
Xt_myh2;Dr_zgc:66156	Xt_myh2;Dr_myh7bb	0	0.341243	0.341243	Metazoa
Xt_vill;Dr_vil1	Xt_vill;Dr_scinla	0	0.332806	0.332806	Metazoa	Dr_Ionocyte;Dr_Rare epidermal subtypes	Xt_Goblet cell;Xt_Hatching gland;Xt_Ionocyte;Xt_Small secretory cells
Xt_vill;Dr_vill	Xt_vill;Dr_scinla	0	0.332806	0.332806	Metazoa	Dr_Ionocyte;Dr_Rare epidermal subtypes	Xt_Goblet cell;Xt_Hatching gland;Xt_Ionocyte;Xt_Small secretory cells
Xt_vill;Dr_avil	Xt_vill;Dr_scinla	0	0.332806	0.332806	Metazoa	Dr_Ionocyte;Dr_Rare epidermal subtypes	Xt_Goblet cell;Xt_Hatching gland;Xt_Ionocyte;Xt_Small secretory cells
Dr_scinla;Xt_scin	Dr_scinla;Xt_vill	0	0.332806	0.332806	Metazoa	Dr_Ionocyte;Dr_Rare epidermal subtypes	Xt_Goblet cell;Xt_Hatching gland;Xt_Ionocyte;Xt_Small secretory cells
Dr_anp32a;Xt_anp32a	Dr_anp32a;Xt_anp32b	0.113147	0.435861	0.322714	Metazoa	Dr_Forebrain/midbrain;Dr_Hindbrain;Dr_Intermediate mesoderm;Dr_Neuroectoderm;Dr_Non-neural ectoderm;Dr_Optic;Dr_Tailbud	Xt_Endothelial;Xt_Eye primordium;Xt_Forebrain/midbrain;Xt_Hindbrain;Xt_Intermediate mesoderm;Xt_Neuroectoderm;Xt_Non-neural ectoderm;Xt_Optic;Xt_Pronephric mesenchyme;Xt_Spemann organizer
Dr_zgc:92027;Xt_gca	Dr_zgc:92027;Xt_sri	0.0618035	0.363158	0.301354	Metazoa	Dr_Endothelial;Dr_Epidermal progenitor;Dr_Ionocyte;Dr_Macrophage;Dr_Placodal area	Xt_Endothelial;Xt_Epidermal progenitor;Xt_Ionocyte;Xt_Myeloid progenitors;Xt_Placodal area
Dr_scinlb;Xt_scin	Dr_scinlb;Xt_vill	0	0.300072	0.300072	Metazoa	Dr_Hatching gland	Xt_Hatching gland
Xt_vill;Dr_vill	Xt_vill;Dr_scinlb	0	0.300072	0.300072	Metazoa	Dr_Hatching gland	Xt_Hatching gland
Xt_vill;Dr_avil	Xt_vill;Dr_scinlb	0	0.300072	0.300072	Metazoa	Dr_Hatching gland	Xt_Hatching gland
Xt_vill;Dr_vil1	Xt_vill;Dr_scinlb	0	0.300072	0.300072	Metazoa	Dr_Hatching gland	Xt_Hatching gland
Xt_Xetrov90000734m;Dr_pdlim3b	Xt_Xetrov90000734m;Dr_ldb3b	0	0.859965	0.859965	Opisthokonta	Dr_Skeletal muscle	Xt_Skeletal muscle
Xt_Xetrov90000734m;Dr_pdlim3a	Xt_Xetrov90000734m;Dr_ldb3b	0	0.859965	0.859965	Opisthokonta	Dr_Skeletal muscle	Xt_Skeletal muscle
Xt_myh9;Dr_myh10	Xt_myh9;Dr_myh9a	0	0.792457	0.792457	Opisthokonta	Dr_Epidermal progenitor;Dr_Placodal area;Dr_Rare epidermal subtypes	Xt_Epidermal progenitor;Xt_Placodal area;Xt_Small secretory cells
Xt_myh9;Dr_myh9b	Xt_myh9;Dr_myh9a	0.0202206	0.792457	0.772237	Opisthokonta	Dr_Epidermal progenitor;Dr_Placodal area;Dr_Rare epidermal subtypes	Xt_Epidermal progenitor;Xt_Placodal area;Xt_Small secretory cells
Xt_myh9;Dr_LOC101884494	Xt_myh9;Dr_myh9a	0.066025	0.792457	0.726432	Opisthokonta	Dr_Epidermal progenitor;Dr_Placodal area;Dr_Rare epidermal subtypes	Xt_Epidermal progenitor;Xt_Placodal area;Xt_Small secretory cells
Dr_foxl1;Xt_foxl1	Dr_foxl1;Xt_foxf1	0	0.634358	0.634358	Opisthokonta	Dr_Intermediate mesoderm	Xt_Intermediate mesoderm
Xt_top1.2;Dr_top1	Xt_top1.2;Dr_zgc:173742	0	0.558974	0.558974	Opisthokonta	Dr_Blastula	Xt_Blastula
Xt_kpna7;Dr_kpna2	Xt_kpna7;Dr_kpna4	0	0.533089	0.533089	Opisthokonta	Dr_Blastula;Dr_Dorsal organizer;Dr_Involuting marginal zone;Dr_Neuroectoderm;Dr_Non-neural ectoderm	Xt_Blastula;Xt_Involuting marginal zone;Xt_Neuroectoderm;Xt_Non-neural ectoderm;Xt_Spemann organizer
Dr_tuba8l4;Xt_tubal3	Dr_tuba8l4;Xt_tuba3c	0	0.499142	0.499142	Opisthokonta	Dr_Blood;Dr_Endothelial;Dr_Eye primordium;Dr_Forebrain/midbrain;Dr_Hindbrain;Dr_Intermediate mesoderm;Dr_Neural crest;Dr_Optic;Dr_Rare epidermal subtypes;Dr_Tailbud	Xt_Blood;Xt_Endothelial;Xt_Eye primordium;Xt_Forebrain/midbrain;Xt_Hindbrain;Xt_Intermediate mesoderm;Xt_Neural crest;Xt_Optic;Xt_Pronephric mesenchyme;Xt_Small secretory cells
Dr_tuba8l4;Xt_LOC100497157	Dr_tuba8l4;Xt_tuba3c	0	0.499142	0.499142	Opisthokonta	Dr_Blood;Dr_Endothelial;Dr_Eye primordium;Dr_Forebrain/midbrain;Dr_Hindbrain;Dr_Intermediate mesoderm;Dr_Neural crest;Dr_Optic;Dr_Rare epidermal subtypes;Dr_Tailbud	Xt_Blood;Xt_Endothelial;Xt_Eye primordium;Xt_Forebrain/midbrain;Xt_Hindbrain;Xt_Intermediate mesoderm;Xt_Neural crest;Xt_Optic;Xt_Pronephric mesenchyme;Xt_Small secretory cells
Dr_tuba8l4;Xt_tuba1b	Dr_tuba8l4;Xt_tuba3c	0	0.499142	0.499142	Opisthokonta	Dr_Blood;Dr_Endothelial;Dr_Eye primordium;Dr_Forebrain/midbrain;Dr_Hindbrain;Dr_Intermediate mesoderm;Dr_Neural crest;Dr_Optic;Dr_Rare epidermal subtypes;Dr_Tailbud	Xt_Blood;Xt_Endothelial;Xt_Eye primordium;Xt_Forebrain/midbrain;Xt_Hindbrain;Xt_Intermediate mesoderm;Xt_Neural crest;Xt_Optic;Xt_Pronephric mesenchyme;Xt_Small secretory cells
Dr_tuba8l4;Xt_Xetrov90024523m	Dr_tuba8l4;Xt_tuba3c	0	0.499142	0.499142	Opisthokonta	Dr_Blood;Dr_Endothelial;Dr_Eye primordium;Dr_Forebrain/midbrain;Dr_Hindbrain;Dr_Intermediate mesoderm;Dr_Neural crest;Dr_Optic;Dr_Rare epidermal subtypes;Dr_Tailbud	Xt_Blood;Xt_Endothelial;Xt_Eye primordium;Xt_Forebrain/midbrain;Xt_Hindbrain;Xt_Intermediate mesoderm;Xt_Neural crest;Xt_Optic;Xt_Pronephric mesenchyme;Xt_Small secretory cells
Dr_tuba8l4;Xt_LOC100490289-like	Dr_tuba8l4;Xt_tuba3c	0	0.499142	0.499142	Opisthokonta	Dr_Blood;Dr_Endothelial;Dr_Eye primordium;Dr_Forebrain/midbrain;Dr_Hindbrain;Dr_Intermediate mesoderm;Dr_Neural crest;Dr_Optic;Dr_Rare epidermal subtypes;Dr_Tailbud	Xt_Blood;Xt_Endothelial;Xt_Eye primordium;Xt_Forebrain/midbrain;Xt_Hindbrain;Xt_Intermediate mesoderm;Xt_Neural crest;Xt_Optic;Xt_Pronephric mesenchyme;Xt_Small secretory cells
Dr_tuba8l4;Xt_Xetrov90024521m	Dr_tuba8l4;Xt_tuba3c	0	0.499142	0.499142	Opisthokonta	Dr_Blood;Dr_Endothelial;Dr_Eye primordium;Dr_Forebrain/midbrain;Dr_Hindbrain;Dr_Intermediate mesoderm;Dr_Neural crest;Dr_Optic;Dr_Rare epidermal subtypes;Dr_Tailbud	Xt_Blood;Xt_Endothelial;Xt_Eye primordium;Xt_Forebrain/midbrain;Xt_Hindbrain;Xt_Intermediate mesoderm;Xt_Neural crest;Xt_Optic;Xt_Pronephric mesenchyme;Xt_Small secretory cells
Dr_tuba8l4;Xt_LOC100497528	Dr_tuba8l4;Xt_tuba3c	0	0.499142	0.499142	Opisthokonta	Dr_Blood;Dr_Endothelial;Dr_Eye primordium;Dr_Forebrain/midbrain;Dr_Hindbrain;Dr_Intermediate mesoderm;Dr_Neural crest;Dr_Optic;Dr_Rare epidermal subtypes;Dr_Tailbud	Xt_Blood;Xt_Endothelial;Xt_Eye primordium;Xt_Forebrain/midbrain;Xt_Hindbrain;Xt_Intermediate mesoderm;Xt_Neural crest;Xt_Optic;Xt_Pronephric mesenchyme;Xt_Small secretory cells
Dr_LOC565454;Xt_Xetrov90020242m	Dr_LOC565454;Xt_Xetrov90020358m	0.134483	0.631414	0.496931	Opisthokonta
Xt_mef2a;Dr_mef2aa	Xt_mef2a;Dr_mef2d	0	0.489455	0.489455	Opisthokonta
Xt_mef2a;Dr_mef2a	Xt_mef2a;Dr_mef2d	0	0.489455	0.489455	Opisthokonta
Dr_tra2b;Xt_tra2b	Dr_tra2b;Xt_tra2a	0	0.449158	0.449158	Opisthokonta	Dr_Involuting marginal zone;Dr_Neuroectoderm;Dr_Non-neural ectoderm	Xt_Involuting marginal zone;Xt_Neuroectoderm;Xt_Non-neural ectoderm
Xt_tubb2b;Dr_zgc:55461	Xt_tubb2b;Dr_tubb2	0	0.446243	0.446243	Opisthokonta	Dr_Neuron;Dr_Rohon-beard neuron	Xt_Neuron;Xt_Rohon-beard neuron
Dr_zgc:65894;Xt_tubb4b	Dr_zgc:65894;Xt_tubb3	0.0595039	0.497419	0.437915	Opisthokonta	Dr_Neuron;Dr_Rohon-beard neuron	Xt_Neuron;Xt_Rohon-beard neuron
Dr_arhgdia;Xt_arhgdia	Dr_arhgdia;Xt_arhgdig	0	0.42229	0.42229	Opisthokonta	Dr_Blood;Dr_Endothelial;Dr_Epidermal progenitor;Dr_Macrophage;Dr_Placodal area;Dr_Rare epidermal subtypes;Dr_Secretory epidermal	Xt_Blood;Xt_Cement gland primordium;Xt_Endothelial;Xt_Epidermal progenitor;Xt_Goblet cell;Xt_Hatching gland;Xt_Myeloid progenitors;Xt_Placodal area;Xt_Small secretory cells
Xt_top1mt-like;Dr_top1	Xt_top1mt-like;Dr_zgc:173742	0	0.416542	0.416542	Opisthokonta
Xt_top1.2;Dr_top1l	Xt_top1.2;Dr_zgc:173742	0.143577	0.558974	0.415397	Opisthokonta	Dr_Blastula	Xt_Blastula
Xt_zic1;Dr_LOC103910057	Xt_zic1;Dr_zic3	0	0.409634	0.409634	Opisthokonta	Dr_Neuroectoderm;Dr_Presomitic mesoderm;Dr_Tailbud	Xt_Hindbrain;Xt_Neuroectoderm;Xt_Skeletal muscle
Xt_pias1;Dr_LOC564496	Xt_pias1;Dr_pias4b	0	0.391168	0.391168	Opisthokonta	Dr_Blastula	Xt_Blastula
Dr_cdc25b;Xt_cdc25b	Dr_cdc25b;Xt_cdc25c	0.0355684	0.421678	0.38611	Opisthokonta	Dr_Blastula;Dr_Involuting marginal zone;Dr_Neuroectoderm	Xt_Blastula;Xt_Involuting marginal zone;Xt_Neuroectoderm
Dr_zgc:153426;Xt_tubb4b	Dr_zgc:153426;Xt_tubb3	0.107396	0.493485	0.386089	Opisthokonta	Dr_Neuron;Dr_Rohon-beard neuron	Xt_Neuron;Xt_Rohon-beard neuron
Dr_pitx3;Xt_pitx3	Dr_pitx3;Xt_pitx1	0.0478851	0.43032	0.382435	Opisthokonta	Dr_Lens;Dr_Placodal area	Xt_Lens;Xt_Placodal area
Dr_nipa2;Xt_nipa2	Dr_nipa2;Xt_nipal4	0.0638953	0.433328	0.369432	Opisthokonta	Dr_Blastula	Xt_Blastula
Dr_zgc:65894;Xt_tubb	Dr_zgc:65894;Xt_tubb3	0.128667	0.497419	0.368752	Opisthokonta	Dr_Neuron;Dr_Rohon-beard neuron	Xt_Neuron;Xt_Rohon-beard neuron
Xt_hmgb3;Dr_hmgb3a	Xt_hmgb3;Dr_hmgb2b	0.103835	0.470024	0.36619	Opisthokonta	Dr_Eye primordium;Dr_Forebrain/midbrain;Dr_Hindbrain;Dr_Intermediate mesoderm;Dr_Optic;Dr_Presomitic mesoderm;Dr_Tailbud	Xt_Eye primordium;Xt_Forebrain/midbrain;Xt_Hindbrain;Xt_Optic;Xt_Spemann organizer;Xt_Tailbud
Xt_Xetrov90022616m;Dr_LOC100333322	Xt_Xetrov90022616m;Dr_LOC100329560	0	0.3654	0.3654	Opisthokonta
Xt_Xetrov90022616m;Dr_hist2h2l	Xt_Xetrov90022616m;Dr_LOC100329560	0	0.3654	0.3654	Opisthokonta
Xt_Xetrov90022616m;Dr_si:ch211-113a14.15	Xt_Xetrov90022616m;Dr_LOC100329560	0	0.3654	0.3654	Opisthokonta
Xt_Xetrov90022616m;Dr_LOC100332744	Xt_Xetrov90022616m;Dr_LOC100329560	0	0.3654	0.3654	Opisthokonta
Xt_Xetrov90022616m;Dr_zgc:112234	Xt_Xetrov90022616m;Dr_LOC100329560	0	0.3654	0.3654	Opisthokonta
Xt_Xetrov90028256m;Dr_LOC100330556	Xt_Xetrov90028256m;Dr_LOC100329560	0	0.365181	0.365181	Opisthokonta
Xt_Xetrov90028256m;Dr_LOC563490	Xt_Xetrov90028256m;Dr_LOC100329560	0	0.365181	0.365181	Opisthokonta
Xt_Xetrov90028256m;Dr_LOC103911340	Xt_Xetrov90028256m;Dr_LOC100329560	0	0.365181	0.365181	Opisthokonta
Xt_Xetrov90028256m;Dr_si:ch211-113a14.29	Xt_Xetrov90028256m;Dr_LOC100329560	0	0.365181	0.365181	Opisthokonta
Xt_Xetrov90028256m;Dr_LOC100538106	Xt_Xetrov90028256m;Dr_LOC100329560	0	0.365181	0.365181	Opisthokonta
Xt_Xetrov90028256m;Dr_LOC564421	Xt_Xetrov90028256m;Dr_LOC100329560	0	0.365181	0.365181	Opisthokonta
Xt_Xetrov90028256m;Dr_si:ch211-113a14.15	Xt_Xetrov90028256m;Dr_LOC100329560	0	0.365181	0.365181	Opisthokonta
Xt_Xetrov90028256m;Dr_LOC100333322	Xt_Xetrov90028256m;Dr_LOC100329560	0	0.365181	0.365181	Opisthokonta
Xt_Xetrov90028256m;Dr_LOC100004810	Xt_Xetrov90028256m;Dr_LOC100329560	0	0.365181	0.365181	Opisthokonta
Xt_Xetrov90028256m;Dr_LOC560748	Xt_Xetrov90028256m;Dr_LOC100329560	0	0.365181	0.365181	Opisthokonta
Xt_Xetrov90028256m;Dr_LOC100332744	Xt_Xetrov90028256m;Dr_LOC100329560	0	0.365181	0.365181	Opisthokonta
Xt_Xetrov90028256m;Dr_LOC100149997	Xt_Xetrov90028256m;Dr_LOC100329560	0	0.365181	0.365181	Opisthokonta
Xt_Xetrov90028256m;Dr_zgc:112234	Xt_Xetrov90028256m;Dr_LOC100329560	0	0.365181	0.365181	Opisthokonta
Xt_Xetrov90028256m;Dr_hist2h2l	Xt_Xetrov90028256m;Dr_LOC100329560	0	0.365181	0.365181	Opisthokonta
Xt_Xetrov90028256m;Dr_LOC100536401	Xt_Xetrov90028256m;Dr_LOC100329560	0	0.365181	0.365181	Opisthokonta
Xt_Xetrov90022616m;Dr_LOC100538106	Xt_Xetrov90022616m;Dr_LOC100329560	0.00123123	0.3654	0.364169	Opisthokonta
Xt_Xetrov90028256m;Dr_LOC100000857	Xt_Xetrov90028256m;Dr_LOC100329560	0.00368082	0.365181	0.3615	Opisthokonta
Xt_myo5b;Dr_myo5b	Xt_myo5b;Dr_si:dkey-110c1.10	0	0.358925	0.358925	Opisthokonta
Dr_copz2;Xt_copz2	Dr_copz2;Xt_copz1	0	0.356721	0.356721	Opisthokonta	Dr_Epidermal progenitor;Dr_Hatching gland;Dr_Notochord;Dr_Placodal area	Xt_Epidermal progenitor;Xt_Hatching gland;Xt_Notochord
Xt_Xetrov90028256m;Dr_LOC101884412	Xt_Xetrov90028256m;Dr_LOC100329560	0.0104566	0.365181	0.354725	Opisthokonta
Xt_nabp2;Dr_LOC101882738	Xt_nabp2;Dr_nabp1b	0	0.351979	0.351979	Opisthokonta	Dr_Blastula;Dr_Involuting marginal zone;Dr_Neuroectoderm;Dr_Non-neural ectoderm	Xt_Blastula;Xt_Involuting marginal zone;Xt_Neuroectoderm;Xt_Non-neural ectoderm
Xt_tuba1c;Dr_tuba2	Xt_tuba1c;Dr_tuba8l	0	0.349009	0.349009	Opisthokonta	Dr_Eye primordium;Dr_Forebrain/midbrain;Dr_Hindbrain;Dr_Macrophage;Dr_Neural crest;Dr_Optic;Dr_Placodal area;Dr_Tailbud	Xt_Eye primordium;Xt_Forebrain/midbrain;Xt_Hindbrain;Xt_Myeloid progenitors;Xt_Neural crest;Xt_Optic;Xt_Placodal area;Xt_Tailbud
Xt_Xetrov90022616m;Dr_LOC100004810	Xt_Xetrov90022616m;Dr_LOC100329560	0.0179469	0.3654	0.347453	Opisthokonta
Xt_Xetrov90022616m;Dr_LOC563490	Xt_Xetrov90022616m;Dr_LOC100329560	0.022014	0.3654	0.343386	Opisthokonta
Xt_Xetrov90022616m;Dr_LOC100330556	Xt_Xetrov90022616m;Dr_LOC100329560	0.0221583	0.3654	0.343242	Opisthokonta
Dr_tuba1b;Xt_Xetrov90024523m	Dr_tuba1b;Xt_tuba3c	0	0.342878	0.342878	Opisthokonta	Dr_Endothelial;Dr_Forebrain/midbrain;Dr_Hindbrain;Dr_Intermediate mesoderm;Dr_Macrophage;Dr_Neural crest;Dr_Optic	Xt_Endothelial;Xt_Eye primordium;Xt_Forebrain/midbrain;Xt_Hindbrain;Xt_Intermediate mesoderm;Xt_Myeloid progenitors;Xt_Neural crest;Xt_Optic;Xt_Pronephric mesenchyme
Dr_tuba1b;Xt_Xetrov90024521m	Dr_tuba1b;Xt_tuba3c	0	0.342878	0.342878	Opisthokonta	Dr_Endothelial;Dr_Forebrain/midbrain;Dr_Hindbrain;Dr_Intermediate mesoderm;Dr_Macrophage;Dr_Neural crest;Dr_Optic	Xt_Endothelial;Xt_Eye primordium;Xt_Forebrain/midbrain;Xt_Hindbrain;Xt_Intermediate mesoderm;Xt_Myeloid progenitors;Xt_Neural crest;Xt_Optic;Xt_Pronephric mesenchyme
Dr_tuba1b;Xt_LOC100497157	Dr_tuba1b;Xt_tuba3c	0	0.342878	0.342878	Opisthokonta	Dr_Endothelial;Dr_Forebrain/midbrain;Dr_Hindbrain;Dr_Intermediate mesoderm;Dr_Macrophage;Dr_Neural crest;Dr_Optic	Xt_Endothelial;Xt_Eye primordium;Xt_Forebrain/midbrain;Xt_Hindbrain;Xt_Intermediate mesoderm;Xt_Myeloid progenitors;Xt_Neural crest;Xt_Optic;Xt_Pronephric mesenchyme
Dr_tuba1b;Xt_LOC100490289-like	Dr_tuba1b;Xt_tuba3c	0	0.342878	0.342878	Opisthokonta	Dr_Endothelial;Dr_Forebrain/midbrain;Dr_Hindbrain;Dr_Intermediate mesoderm;Dr_Macrophage;Dr_Neural crest;Dr_Optic	Xt_Endothelial;Xt_Eye primordium;Xt_Forebrain/midbrain;Xt_Hindbrain;Xt_Intermediate mesoderm;Xt_Myeloid progenitors;Xt_Neural crest;Xt_Optic;Xt_Pronephric mesenchyme
Dr_tuba1b;Xt_tubal3	Dr_tuba1b;Xt_tuba3c	0	0.342878	0.342878	Opisthokonta	Dr_Endothelial;Dr_Forebrain/midbrain;Dr_Hindbrain;Dr_Intermediate mesoderm;Dr_Macrophage;Dr_Neural crest;Dr_Optic	Xt_Endothelial;Xt_Eye primordium;Xt_Forebrain/midbrain;Xt_Hindbrain;Xt_Intermediate mesoderm;Xt_Myeloid progenitors;Xt_Neural crest;Xt_Optic;Xt_Pronephric mesenchyme
Xt_Xetrov90028256m;Dr_LOC564549	Xt_Xetrov90028256m;Dr_LOC100329560	0.0223781	0.365181	0.342803	Opisthokonta
Xt_Xetrov90022616m;Dr_LOC564421	Xt_Xetrov90022616m;Dr_LOC100329560	0.0240114	0.3654	0.341389	Opisthokonta
Dr_mef2d;Xt_Xetrov90022298m	Dr_mef2d;Xt_mef2a	0.148741	0.489455	0.340713	Opisthokonta
Xt_Xetrov90022616m;Dr_LOC103911340	Xt_Xetrov90022616m;Dr_LOC100329560	0.0256936	0.3654	0.339706	Opisthokonta
Xt_tuba1c;Dr_tuba7l	Xt_tuba1c;Dr_tuba8l	0.0105499	0.349009	0.338459	Opisthokonta	Dr_Eye primordium;Dr_Forebrain/midbrain;Dr_Hindbrain;Dr_Macrophage;Dr_Neural crest;Dr_Optic;Dr_Placodal area;Dr_Tailbud	Xt_Eye primordium;Xt_Forebrain/midbrain;Xt_Hindbrain;Xt_Myeloid progenitors;Xt_Neural crest;Xt_Optic;Xt_Placodal area;Xt_Tailbud
Xt_nipal4;Dr_nipal4	Xt_nipal4;Dr_nipa2	0.0973194	0.433328	0.336008	Opisthokonta	Dr_Blastula	Xt_Blastula
Xt_tuba1c;Dr_tuba8l3	Xt_tuba1c;Dr_tuba8l	0.0137455	0.349009	0.335264	Opisthokonta	Dr_Eye primordium;Dr_Forebrain/midbrain;Dr_Hindbrain;Dr_Macrophage;Dr_Neural crest;Dr_Optic;Dr_Placodal area;Dr_Tailbud	Xt_Eye primordium;Xt_Forebrain/midbrain;Xt_Hindbrain;Xt_Myeloid progenitors;Xt_Neural crest;Xt_Optic;Xt_Placodal area;Xt_Tailbud
Xt_Xetrov90022616m;Dr_LOC560748	Xt_Xetrov90022616m;Dr_LOC100329560	0.0374297	0.3654	0.32797	Opisthokonta
Dr_LOC565454;Xt_LOC100497952-like.1	Dr_LOC565454;Xt_Xetrov90020358m	0.307809	0.631414	0.323605	Opisthokonta
Xt_pias1;Dr_pias1b	Xt_pias1;Dr_pias4b	0.0679319	0.391168	0.323236	Opisthokonta	Dr_Blastula	Xt_Blastula
Xt_pitx1;Dr_pitx1	Xt_pitx1;Dr_pitx3	0.112655	0.43032	0.317666	Opisthokonta	Dr_Lens;Dr_Placodal area	Xt_Lens;Xt_Placodal area
Xt_top1mt-like;Dr_top1l	Xt_top1mt-like;Dr_zgc:173742	0.099658	0.416542	0.316884	Opisthokonta
Xt_tuba1c;Dr_si:ch73-199e17.1	Xt_tuba1c;Dr_tuba8l	0.0337337	0.349009	0.315275	Opisthokonta	Dr_Eye primordium;Dr_Forebrain/midbrain;Dr_Hindbrain;Dr_Macrophage;Dr_Neural crest;Dr_Optic;Dr_Placodal area;Dr_Tailbud	Xt_Eye primordium;Xt_Forebrain/midbrain;Xt_Hindbrain;Xt_Myeloid progenitors;Xt_Neural crest;Xt_Optic;Xt_Placodal area;Xt_Tailbud
Xt_ppp1r3c.2;Dr_ppp1r3ca	Xt_ppp1r3c.2;Dr_zgc:77112	0.195658	0.509092	0.313434	Opisthokonta	Dr_Blastula	Xt_Blastula
Dr_tuba1b;Xt_LOC100497528	Dr_tuba1b;Xt_tuba3c	0.0299417	0.342878	0.312936	Opisthokonta	Dr_Endothelial;Dr_Forebrain/midbrain;Dr_Hindbrain;Dr_Intermediate mesoderm;Dr_Macrophage;Dr_Neural crest;Dr_Optic	Xt_Endothelial;Xt_Eye primordium;Xt_Forebrain/midbrain;Xt_Hindbrain;Xt_Intermediate mesoderm;Xt_Myeloid progenitors;Xt_Neural crest;Xt_Optic;Xt_Pronephric mesenchyme
Dr_zgc:113983;Xt_Xetrov90022557m	Dr_zgc:113983;Xt_Xetrov90025560m	0	0.309777	0.309777	Opisthokonta
Dr_zgc:113983;Xt_Xetrov90022572m	Dr_zgc:113983;Xt_Xetrov90025560m	0	0.309777	0.309777	Opisthokonta
Dr_zgc:113983;Xt_Xetrov90022539m	Dr_zgc:113983;Xt_Xetrov90025560m	0	0.309777	0.309777	Opisthokonta
Dr_zgc:113983;Xt_Xetrov90022581m	Dr_zgc:113983;Xt_Xetrov90025560m	0	0.309777	0.309777	Opisthokonta
Dr_zgc:113983;Xt_Xetrov90009609m	Dr_zgc:113983;Xt_Xetrov90025560m	0	0.309777	0.309777	Opisthokonta
Dr_zgc:113983;Xt_Xetrov90022578m	Dr_zgc:113983;Xt_Xetrov90025560m	0	0.309777	0.309777	Opisthokonta
Xt_Xetrov90025560m;Dr_h3f3c	Xt_Xetrov90025560m;Dr_zgc:113983	0	0.309777	0.309777	Opisthokonta
Dr_zgc:113983;Xt_Xetrov90022586m	Dr_zgc:113983;Xt_Xetrov90025560m	0	0.309777	0.309777	Opisthokonta
Dr_zgc:113983;Xt_Xetrov90022590m	Dr_zgc:113983;Xt_Xetrov90025560m	0	0.309777	0.309777	Opisthokonta
Dr_zgc:113983;Xt_Xetrov90028677m	Dr_zgc:113983;Xt_Xetrov90025560m	0	0.309777	0.309777	Opisthokonta
Dr_zgc:113983;Xt_Xetrov90022605m	Dr_zgc:113983;Xt_Xetrov90025560m	0	0.309777	0.309777	Opisthokonta
Dr_zgc:113983;Xt_Xetrov90022608m	Dr_zgc:113983;Xt_Xetrov90025560m	0	0.309777	0.309777	Opisthokonta
Dr_zgc:113983;Xt_Xetrov90022526m	Dr_zgc:113983;Xt_Xetrov90025560m	0	0.309777	0.309777	Opisthokonta
Xt_Xetrov90025560m;Dr_h3f3a	Xt_Xetrov90025560m;Dr_zgc:113983	0	0.309777	0.309777	Opisthokonta
Dr_zgc:113983;Xt_Xetrov90022518m	Dr_zgc:113983;Xt_Xetrov90025560m	0	0.309777	0.309777	Opisthokonta
Dr_zgc:113983;Xt_Xetrov90022514m	Dr_zgc:113983;Xt_Xetrov90025560m	0	0.309777	0.309777	Opisthokonta
Dr_zgc:113983;Xt_Xetrov90028257m	Dr_zgc:113983;Xt_Xetrov90025560m	0	0.309777	0.309777	Opisthokonta
Dr_zgc:113983;Xt_Xetrov90009606m	Dr_zgc:113983;Xt_Xetrov90025560m	0	0.309777	0.309777	Opisthokonta
Dr_zgc:113983;Xt_Xetrov90028258m	Dr_zgc:113983;Xt_Xetrov90025560m	0	0.309777	0.309777	Opisthokonta
Dr_zgc:113983;Xt_Xetrov90028252m	Dr_zgc:113983;Xt_Xetrov90025560m	0	0.309777	0.309777	Opisthokonta
Dr_zgc:113983;Xt_Xetrov90015423m	Dr_zgc:113983;Xt_Xetrov90025560m	0	0.309777	0.309777	Opisthokonta
Dr_zgc:113983;Xt_Xetrov90015432m	Dr_zgc:113983;Xt_Xetrov90025560m	0	0.309777	0.309777	Opisthokonta
Dr_zgc:113983;Xt_Xetrov90015441m	Dr_zgc:113983;Xt_Xetrov90025560m	0	0.309777	0.309777	Opisthokonta
Dr_zgc:113983;Xt_Xetrov90022502m	Dr_zgc:113983;Xt_Xetrov90025560m	0	0.309777	0.309777	Opisthokonta
Dr_zgc:113983;Xt_Xetrov90009639m	Dr_zgc:113983;Xt_Xetrov90025560m	0	0.309777	0.309777	Opisthokonta
Dr_zgc:113983;Xt_Xetrov90009630m	Dr_zgc:113983;Xt_Xetrov90025560m	0	0.309777	0.309777	Opisthokonta
Xt_Xetrov90025560m;Dr_h3f3b.1	Xt_Xetrov90025560m;Dr_zgc:113983	0	0.309777	0.309777	Opisthokonta
Dr_zgc:113983;Xt_Xetrov90009627m	Dr_zgc:113983;Xt_Xetrov90025560m	0	0.309777	0.309777	Opisthokonta
Dr_zgc:113983;Xt_Xetrov90022509m	Dr_zgc:113983;Xt_Xetrov90025560m	0	0.309777	0.309777	Opisthokonta
Xt_Xetrov90025560m;Dr_h3f3d	Xt_Xetrov90025560m;Dr_zgc:113983	0	0.309777	0.309777	Opisthokonta
Dr_zgc:113983;Xt_Xetrov90022510m	Dr_zgc:113983;Xt_Xetrov90025560m	0	0.309777	0.309777	Opisthokonta
Dr_zgc:113983;Xt_Xetrov90009622m	Dr_zgc:113983;Xt_Xetrov90025560m	0	0.309777	0.309777	Opisthokonta
Dr_zgc:113983;Xt_Xetrov90009616m	Dr_zgc:113983;Xt_Xetrov90025560m	0	0.309777	0.309777	Opisthokonta
Dr_zgc:113983;Xt_Xetrov90015404m	Dr_zgc:113983;Xt_Xetrov90025560m	0	0.309777	0.309777	Opisthokonta
Dr_zgc:113983;Xt_Xetrov90009615m	Dr_zgc:113983;Xt_Xetrov90025560m	0	0.309777	0.309777	Opisthokonta
Dr_zgc:113983;Xt_Xetrov90028674m	Dr_zgc:113983;Xt_Xetrov90025560m	0	0.309777	0.309777	Opisthokonta
Dr_zgc:113983;Xt_Xetrov90006490m	Dr_zgc:113983;Xt_Xetrov90025560m	0	0.309777	0.309777	Opisthokonta
Dr_zgc:113983;Xt_Xetrov90029514m	Dr_zgc:113983;Xt_Xetrov90025560m	0	0.309777	0.309777	Opisthokonta
Dr_zgc:113983;Xt_Xetrov90029350m	Dr_zgc:113983;Xt_Xetrov90025560m	0	0.309777	0.309777	Opisthokonta
Dr_zgc:113983;Xt_hist2h3c	Dr_zgc:113983;Xt_Xetrov90025560m	0	0.309777	0.309777	Opisthokonta
Dr_zgc:113983;Xt_hist1h3g	Dr_zgc:113983;Xt_Xetrov90025560m	0	0.309777	0.309777	Opisthokonta
Xt_Xetrov90025560m;Dr_si:ch1073-429i10.3	Xt_Xetrov90025560m;Dr_zgc:113983	0	0.309777	0.309777	Opisthokonta
Dr_zgc:113983;Xt_Xetrov90029539m	Dr_zgc:113983;Xt_Xetrov90025560m	0	0.309777	0.309777	Opisthokonta
Dr_zgc:113983;Xt_Xetrov90029537m	Dr_zgc:113983;Xt_Xetrov90025560m	0	0.309777	0.309777	Opisthokonta
Dr_zgc:113983;Xt_Xetrov90029535m	Dr_zgc:113983;Xt_Xetrov90025560m	0	0.309777	0.309777	Opisthokonta
Dr_zgc:113983;Xt_Xetrov90009585m	Dr_zgc:113983;Xt_Xetrov90025560m	0	0.309777	0.309777	Opisthokonta
Dr_zgc:113983;Xt_Xetrov90029510m	Dr_zgc:113983;Xt_Xetrov90025560m	0	0.309777	0.309777	Opisthokonta
Dr_zgc:113983;Xt_Xetrov90029508m	Dr_zgc:113983;Xt_Xetrov90025560m	0	0.309777	0.309777	Opisthokonta
Dr_zgc:113983;Xt_LOC100487130	Dr_zgc:113983;Xt_Xetrov90025560m	0	0.309777	0.309777	Opisthokonta
Dr_zgc:113983;Xt_LOC101732683	Dr_zgc:113983;Xt_Xetrov90025560m	0	0.309777	0.309777	Opisthokonta
Dr_zgc:113983;Xt_LOC101733986	Dr_zgc:113983;Xt_Xetrov90025560m	0	0.309777	0.309777	Opisthokonta
Dr_zgc:113983;Xt_Xetrov90022610m	Dr_zgc:113983;Xt_Xetrov90025560m	0	0.309777	0.309777	Opisthokonta
Dr_zgc:113983;Xt_Xetrov90029324m	Dr_zgc:113983;Xt_Xetrov90025560m	0	0.309777	0.309777	Opisthokonta
Dr_zgc:113983;Xt_Xetrov90022614m	Dr_zgc:113983;Xt_Xetrov90025560m	0	0.309777	0.309777	Opisthokonta
Dr_zgc:113983;Xt_Xetrov90009580m	Dr_zgc:113983;Xt_Xetrov90025560m	0	0.309777	0.309777	Opisthokonta
Dr_zgc:113983;Xt_Xetrov90006495m	Dr_zgc:113983;Xt_Xetrov90025560m	0	0.309777	0.309777	Opisthokonta
Xt_Xetrov90022616m;Dr_si:ch211-113a14.29	Xt_Xetrov90022616m;Dr_LOC100329560	0.0575287	0.3654	0.307871	Opisthokonta
Dr_cebpa;Xt_cebpa	Dr_cebpa;Xt_cebpb	0	0.307468	0.307468	Opisthokonta	Dr_Macrophage	Xt_Myeloid progenitors
Xt_Xetrov90022616m;Dr_LOC100149997	Xt_Xetrov90022616m;Dr_LOC100329560	0.0602348	0.3654	0.305165	Opisthokonta
Xt_Xetrov90022616m;Dr_LOC100536401	Xt_Xetrov90022616m;Dr_LOC100329560	0.0614073	0.3654	0.303993	Opisthokonta
Xt_hba3;Dr_si:ch211-5k11.6	Xt_hba3;Dr_hbbe3	0	0.954636	0.954636	Eukaryota	Dr_Blood	Xt_Blood
Xt_tnni1.2;Dr_zgc:112242	Xt_tnni1.2;Dr_tnni2b.1	0	0.950824	0.950824	Eukaryota	Dr_Presomitic mesoderm;Dr_Skeletal muscle	Xt_Skeletal muscle
Xt_tnni2;Dr_tnni2a.1	Xt_tnni2;Dr_tnni2b.1	0	0.926745	0.926745	Eukaryota	Dr_Presomitic mesoderm;Dr_Skeletal muscle	Xt_Skeletal muscle
Xt_emilin3;Dr_emilin3	Xt_emilin3;Dr_emilin3a	0	0.922747	0.922747	Eukaryota	Dr_Notochord	Xt_Notochord
Xt_LOC100495470;Dr_LOC100536949	Xt_LOC100495470;Dr_si:dkey-65b12.6	0	0.904417	0.904417	Eukaryota	Dr_Secretory epidermal	Xt_Cement gland primordium
Xt_LOC100495470;Dr_LOC101886317	Xt_LOC100495470;Dr_si:dkey-65b12.6	0	0.904417	0.904417	Eukaryota	Dr_Secretory epidermal	Xt_Cement gland primordium
Dr_si:dkey-65b12.6;Xt_LOC101732634	Dr_si:dkey-65b12.6;Xt_LOC100495470	0	0.904417	0.904417	Eukaryota	Dr_Secretory epidermal	Xt_Cement gland primordium
Dr_si:dkey-65b12.6;Xt_LOC100495886	Dr_si:dkey-65b12.6;Xt_LOC100495470	0	0.904417	0.904417	Eukaryota	Dr_Secretory epidermal	Xt_Cement gland primordium
Xt_LOC100495470;Dr_LOC103909815	Xt_LOC100495470;Dr_si:dkey-65b12.6	0	0.904417	0.904417	Eukaryota	Dr_Secretory epidermal	Xt_Cement gland primordium
Dr_si:dkey-65b12.6;Xt_LOC100489882	Dr_si:dkey-65b12.6;Xt_LOC100495470	0	0.904417	0.904417	Eukaryota	Dr_Secretory epidermal	Xt_Cement gland primordium
Xt_LOC100495470;Dr_muc2	Xt_LOC100495470;Dr_si:dkey-65b12.6	0	0.904417	0.904417	Eukaryota	Dr_Secretory epidermal	Xt_Cement gland primordium
Xt_LOC100495470;Dr_LOC100332798	Xt_LOC100495470;Dr_si:dkey-65b12.6	0	0.904417	0.904417	Eukaryota	Dr_Secretory epidermal	Xt_Cement gland primordium
Dr_si:dkey-65b12.6;Xt_LOC101735028	Dr_si:dkey-65b12.6;Xt_LOC100495470	0	0.904417	0.904417	Eukaryota	Dr_Secretory epidermal	Xt_Cement gland primordium
Dr_si:dkey-65b12.6;Xt_fcgbp	Dr_si:dkey-65b12.6;Xt_LOC100495470	0	0.904417	0.904417	Eukaryota	Dr_Secretory epidermal	Xt_Cement gland primordium
Xt_LOC100495470;Dr_LOC101885726	Xt_LOC100495470;Dr_si:dkey-65b12.6	0	0.904417	0.904417	Eukaryota	Dr_Secretory epidermal	Xt_Cement gland primordium
Xt_LOC100495470;Dr_LOC100149773	Xt_LOC100495470;Dr_si:dkey-65b12.6	0	0.904417	0.904417	Eukaryota	Dr_Secretory epidermal	Xt_Cement gland primordium
Dr_si:dkey-65b12.6;Xt_Xetrov90019631m	Dr_si:dkey-65b12.6;Xt_LOC100495470	0	0.904417	0.904417	Eukaryota	Dr_Secretory epidermal	Xt_Cement gland primordium
Xt_LOC100495470;Dr_muc5b	Xt_LOC100495470;Dr_si:dkey-65b12.6	0	0.904417	0.904417	Eukaryota	Dr_Secretory epidermal	Xt_Cement gland primordium
Xt_LOC100495470;Dr_LOC101885543	Xt_LOC100495470;Dr_si:dkey-65b12.6	0	0.904417	0.904417	Eukaryota	Dr_Secretory epidermal	Xt_Cement gland primordium
Xt_LOC100495470;Dr_LOC100334291	Xt_LOC100495470;Dr_si:dkey-65b12.6	0	0.904417	0.904417	Eukaryota	Dr_Secretory epidermal	Xt_Cement gland primordium
Dr_si:dkey-65b12.6;Xt_LOC100493184	Dr_si:dkey-65b12.6;Xt_LOC100495470	0	0.904417	0.904417	Eukaryota	Dr_Secretory epidermal	Xt_Cement gland primordium
Dr_si:dkey-65b12.6;Xt_Xetrov90019630m	Dr_si:dkey-65b12.6;Xt_LOC100495470	0	0.904417	0.904417	Eukaryota	Dr_Secretory epidermal	Xt_Cement gland primordium
Xt_LOC100495470;Dr_LOC101884713	Xt_LOC100495470;Dr_si:dkey-65b12.6	0	0.904417	0.904417	Eukaryota	Dr_Secretory epidermal	Xt_Cement gland primordium
Dr_si:dkey-65b12.6;Xt_LOC100492852	Dr_si:dkey-65b12.6;Xt_LOC100495470	0	0.904417	0.904417	Eukaryota	Dr_Secretory epidermal	Xt_Cement gland primordium
Xt_hba3;Dr_si:ch211-5k11.6	Xt_hba3;Dr_zgc:163057	0	0.898187	0.898187	Eukaryota	Dr_Blood	Xt_Blood
Dr_mmp13a;Xt_LOC100489571	Dr_mmp13a;Xt_mmp7	0	0.878098	0.878098	Eukaryota	Dr_Macrophage	Xt_Myeloid progenitors
Dr_mmp13a;Xt_LOC100489735	Dr_mmp13a;Xt_mmp7	0	0.878098	0.878098	Eukaryota	Dr_Macrophage	Xt_Myeloid progenitors
Dr_mmp13a;Xt_LOC100491214	Dr_mmp13a;Xt_mmp7	0	0.878098	0.878098	Eukaryota	Dr_Macrophage	Xt_Myeloid progenitors
Dr_mmp13a;Xt_LOC100491547	Dr_mmp13a;Xt_mmp7	0	0.878098	0.878098	Eukaryota	Dr_Macrophage	Xt_Myeloid progenitors
Dr_mmp13a;Xt_LOC100494588	Dr_mmp13a;Xt_mmp7	0	0.878098	0.878098	Eukaryota	Dr_Macrophage	Xt_Myeloid progenitors
Dr_mmp13a;Xt_mmp1	Dr_mmp13a;Xt_mmp7	0	0.878098	0.878098	Eukaryota	Dr_Macrophage	Xt_Myeloid progenitors
Xt_tekt3;Dr_tekt3	Xt_tekt3;Dr_tekt4	0	0.877008	0.877008	Eukaryota
Xt_hba-l5;Dr_si:ch211-5k11.6	Xt_hba-l5;Dr_MGC173646	0	0.849482	0.849482	Eukaryota	Dr_Blood	Xt_Blood
Dr_zgc:173915;Xt_LOC101731491	Dr_zgc:173915;Xt_MGC107908	0	0.843469	0.843469	Eukaryota
Dr_zgc:173915;Xt_LOC100488644	Dr_zgc:173915;Xt_MGC107908	0	0.843469	0.843469	Eukaryota
Dr_zgc:173915;Xt_LOC100488329	Dr_zgc:173915;Xt_MGC107908	0	0.843469	0.843469	Eukaryota
Xt_hba-l5;Dr_si:ch211-5k11.6	Xt_hba-l5;Dr_si:ch211-5k11.12	0	0.843407	0.843407	Eukaryota	Dr_Blood	Xt_Blood
Dr_LOC100536659;Xt_chrne	Dr_LOC100536659;Xt_chrna1.2	0	0.842128	0.842128	Eukaryota	Dr_Skeletal muscle	Xt_Skeletal muscle
Xt_hba-l5;Dr_si:ch211-5k11.6	Xt_hba-l5;Dr_hbbe3	0	0.837907	0.837907	Eukaryota	Dr_Blood	Xt_Blood
Dr_LOC100536659;Xt_chrne	Dr_LOC100536659;Xt_chrnd	0	0.836266	0.836266	Eukaryota	Dr_Skeletal muscle	Xt_Skeletal muscle
Dr_spi1b;Xt_spi1	Dr_spi1b;Xt_spib	0	0.834172	0.834172	Eukaryota	Dr_Macrophage	Xt_Myeloid progenitors
Xt_hba-l5;Dr_si:ch211-5k11.6	Xt_hba-l5;Dr_hbbe2	0	0.833071	0.833071	Eukaryota	Dr_Blood	Xt_Blood
Dr_col9a1b;Xt_Xetrov90014310m	Dr_col9a1b;Xt_col9a3	0	0.830542	0.830542	Eukaryota	Dr_Notochord	Xt_Notochord
Dr_col9a1b;Xt_LOC101731071	Dr_col9a1b;Xt_col9a3	0	0.830542	0.830542	Eukaryota	Dr_Notochord	Xt_Notochord
Xt_smyd1;Dr_smyd1a	Xt_smyd1;Dr_smyd2b	0	0.827438	0.827438	Eukaryota	Dr_Presomitic mesoderm;Dr_Skeletal muscle	Xt_Skeletal muscle
Dr_pdlim5b;Xt_pdlim5	Dr_pdlim5b;Xt_Xetrov90000734m	0	0.824967	0.824967	Eukaryota
Xt_Xetrov90000734m;Dr_pdlim3a	Xt_Xetrov90000734m;Dr_pdlim5b	0	0.824967	0.824967	Eukaryota
Xt_Xetrov90000734m;Dr_pdlim3b	Xt_Xetrov90000734m;Dr_pdlim5b	0	0.824967	0.824967	Eukaryota
Xt_rac2;Dr_si:ch211-1f22.2	Xt_rac2;Dr_rhogb	0	0.821167	0.821167	Eukaryota	Dr_Macrophage	Xt_Myeloid progenitors
Dr_rhogb;Xt_rhog-like.2	Dr_rhogb;Xt_rac2	0	0.821167	0.821167	Eukaryota	Dr_Macrophage	Xt_Myeloid progenitors
Dr_rhogb;Xt_rhog-like.1	Dr_rhogb;Xt_rac2	0	0.821167	0.821167	Eukaryota	Dr_Macrophage	Xt_Myeloid progenitors
Xt_rac2;Dr_rac3b	Xt_rac2;Dr_rhogb	0	0.821167	0.821167	Eukaryota	Dr_Macrophage	Xt_Myeloid progenitors
Xt_rac2;Dr_rac1b	Xt_rac2;Dr_rhogb	0	0.821167	0.821167	Eukaryota	Dr_Macrophage	Xt_Myeloid progenitors
Xt_rac2;Dr_rac1a	Xt_rac2;Dr_rhogb	0	0.821167	0.821167	Eukaryota	Dr_Macrophage	Xt_Myeloid progenitors
Xt_rac2;Dr_rac3a	Xt_rac2;Dr_rhogb	0	0.821167	0.821167	Eukaryota	Dr_Macrophage	Xt_Myeloid progenitors
Xt_rac2;Dr_rac1l	Xt_rac2;Dr_rhogb	0	0.821167	0.821167	Eukaryota	Dr_Macrophage	Xt_Myeloid progenitors
Xt_rac2;Dr_LOC100537765	Xt_rac2;Dr_rhogb	0	0.821167	0.821167	Eukaryota	Dr_Macrophage	Xt_Myeloid progenitors
Xt_rac2;Dr_si:ch211-1f22.1	Xt_rac2;Dr_rhogb	0	0.821167	0.821167	Eukaryota	Dr_Macrophage	Xt_Myeloid progenitors
Xt_hbz;Dr_si:ch211-5k11.6	Xt_hbz;Dr_hbbe3	0	0.810858	0.810858	Eukaryota	Dr_Blood	Xt_Blood
Xt_hba-l5;Dr_si:ch211-5k11.6	Xt_hba-l5;Dr_hbbe1.1	0	0.807584	0.807584	Eukaryota	Dr_Blood	Xt_Blood
Xt_hbz;Dr_si:ch211-5k11.6	Xt_hbz;Dr_MGC173646	0	0.803561	0.803561	Eukaryota	Dr_Blood	Xt_Blood
Xt_myh4;Dr_myhb	Xt_myh4;Dr_myhz2	0	0.800452	0.800452	Eukaryota	Dr_Skeletal muscle	Xt_Skeletal muscle
Xt_myh4;Dr_LOC100537594	Xt_myh4;Dr_myhz2	0	0.800452	0.800452	Eukaryota	Dr_Skeletal muscle	Xt_Skeletal muscle
Xt_myh4;Dr_zgc:66156	Xt_myh4;Dr_myhz2	0	0.800452	0.800452	Eukaryota	Dr_Skeletal muscle	Xt_Skeletal muscle
Xt_myh4;Dr_wu:fd14a01	Xt_myh4;Dr_myhz2	0	0.800452	0.800452	Eukaryota	Dr_Skeletal muscle	Xt_Skeletal muscle
Xt_myl4;Dr_myl4	Xt_myl4;Dr_myl13	0	0.799145	0.799145	Eukaryota	Dr_Skeletal muscle	Xt_Skeletal muscle
Dr_samsn1a;Xt_samsn1	Dr_samsn1a;Xt_sash3	0	0.798606	0.798606	Eukaryota	Dr_Macrophage	Xt_Myeloid progenitors
Xt_sash3;Dr_sash3	Xt_sash3;Dr_samsn1a	0	0.798606	0.798606	Eukaryota	Dr_Macrophage	Xt_Myeloid progenitors
Dr_mmp13a;Xt_LOC100489735	Dr_mmp13a;Xt_mmp9	0	0.793725	0.793725	Eukaryota	Dr_Macrophage	Xt_Myeloid progenitors
Dr_mmp13a;Xt_LOC100494588	Dr_mmp13a;Xt_mmp9	0	0.793725	0.793725	Eukaryota	Dr_Macrophage	Xt_Myeloid progenitors
Dr_mmp13a;Xt_LOC100491547	Dr_mmp13a;Xt_mmp9	0	0.793725	0.793725	Eukaryota	Dr_Macrophage	Xt_Myeloid progenitors
Dr_mmp13a;Xt_mmp1	Dr_mmp13a;Xt_mmp9	0	0.793725	0.793725	Eukaryota	Dr_Macrophage	Xt_Myeloid progenitors
Dr_mmp13a;Xt_LOC100491214	Dr_mmp13a;Xt_mmp9	0	0.793725	0.793725	Eukaryota	Dr_Macrophage	Xt_Myeloid progenitors
Dr_mmp13a;Xt_LOC100489571	Dr_mmp13a;Xt_mmp9	0	0.793725	0.793725	Eukaryota	Dr_Macrophage	Xt_Myeloid progenitors
Xt_mmp9;Dr_mmp9	Xt_mmp9;Dr_mmp13a	0	0.793725	0.793725	Eukaryota	Dr_Macrophage	Xt_Myeloid progenitors
Xt_ca2;Dr_cahz	Xt_ca2;Dr_ca15a	0	0.789999	0.789999	Eukaryota	Dr_Ionocyte	Xt_Ionocyte
Xt_ldb3-like.2;Dr_ldb3a	Xt_ldb3-like.2;Dr_LOC103910026	0	0.788454	0.788454	Eukaryota	Dr_Skeletal muscle	Xt_Skeletal muscle
Dr_LOC103910026;Xt_pdlim7	Dr_LOC103910026;Xt_ldb3-like.2	0	0.788454	0.788454	Eukaryota	Dr_Skeletal muscle	Xt_Skeletal muscle
Xt_hbz;Dr_si:ch211-5k11.6	Xt_hbz;Dr_hbbe2	0	0.784656	0.784656	Eukaryota	Dr_Blood	Xt_Blood
Xt_hbz;Dr_si:ch211-5k11.6	Xt_hbz;Dr_hbbe1.1	0	0.782569	0.782569	Eukaryota	Dr_Blood	Xt_Blood
Dr_col9a1b;Xt_LOC101731071	Dr_col9a1b;Xt_col5a1-like	0	0.775621	0.775621	Eukaryota	Dr_Notochord;Dr_Notoplate	Xt_Notochord;Xt_Notoplate
Dr_col9a1b;Xt_Xetrov90014310m	Dr_col9a1b;Xt_col5a1-like	0	0.775621	0.775621	Eukaryota	Dr_Notochord;Dr_Notoplate	Xt_Notochord;Xt_Notoplate
Xt_hba-l5;Dr_si:ch211-5k11.6	Xt_hba-l5;Dr_zgc:163057	0	0.765059	0.765059	Eukaryota	Dr_Blood	Xt_Blood
Xt_ca12;Dr_ca12	Xt_ca12;Dr_zgc:153760	0	0.764155	0.764155	Eukaryota	Dr_Ionocyte	Xt_Ionocyte
Xt_ca12;Dr_ca12	Xt_ca12;Dr_ca15a	0	0.762746	0.762746	Eukaryota	Dr_Ionocyte	Xt_Ionocyte
Xt_ca2;Dr_cahz	Xt_ca2;Dr_zgc:153760	0	0.760813	0.760813	Eukaryota	Dr_Ionocyte	Xt_Ionocyte
Xt_myh8-like;Dr_LOC100537594	Xt_myh8-like;Dr_myhz2	0	0.757705	0.757705	Eukaryota	Dr_Skeletal muscle	Xt_Skeletal muscle
Xt_myh8-like;Dr_zgc:66156	Xt_myh8-like;Dr_myhz2	0	0.757705	0.757705	Eukaryota	Dr_Skeletal muscle	Xt_Skeletal muscle
Xt_myh8-like;Dr_wu:fd14a01	Xt_myh8-like;Dr_myhz2	0	0.757705	0.757705	Eukaryota	Dr_Skeletal muscle	Xt_Skeletal muscle
Xt_myh8-like;Dr_myhb	Xt_myh8-like;Dr_myhz2	0	0.757705	0.757705	Eukaryota	Dr_Skeletal muscle	Xt_Skeletal muscle
Xt_tll1-like.2;Dr_tll1	Xt_tll1-like.2;Dr_he1b	0	0.7572	0.7572	Eukaryota	Dr_Hatching gland	Xt_Hatching gland
Dr_col9a1b;Xt_LOC101731071	Dr_col9a1b;Xt_col5a3-like	0	0.756808	0.756808	Eukaryota	Dr_Notochord;Dr_Notoplate	Xt_Notochord;Xt_Notoplate
Dr_col9a1b;Xt_Xetrov90014310m	Dr_col9a1b;Xt_col5a3-like	0	0.756808	0.756808	Eukaryota	Dr_Notochord;Dr_Notoplate	Xt_Notochord;Xt_Notoplate
Xt_ldb3-like.2;Dr_ldb3a	Xt_ldb3-like.2;Dr_synpo2lb	0	0.755786	0.755786	Eukaryota	Dr_Skeletal muscle	Xt_Skeletal muscle
Dr_actn3b;Xt_actn2	Dr_actn3b;Xt_ehbp1l1-like	0	0.755476	0.755476	Eukaryota	Dr_Skeletal muscle	Xt_Skeletal muscle
Xt_ehbp1l1-like;Dr_ehbp1l1b	Xt_ehbp1l1-like;Dr_actn3b	0	0.755476	0.755476	Eukaryota	Dr_Skeletal muscle	Xt_Skeletal muscle
Xt_tekt2;Dr_tekt2	Xt_tekt2;Dr_tekt4	0	0.752784	0.752784	Eukaryota
Dr_pdlim5b;Xt_pdlim5	Dr_pdlim5b;Xt_ldb3-like.2	0	0.75051	0.75051	Eukaryota
Xt_ldb3-like.2;Dr_ldb3a	Xt_ldb3-like.2;Dr_pdlim5b	0	0.75051	0.75051	Eukaryota
Xt_tll1-like.2;Dr_tll1	Xt_tll1-like.2;Dr_he1a	0	0.749793	0.749793	Eukaryota	Dr_Hatching gland	Xt_Hatching gland
Xt_tnni2;Dr_tnni2a.1	Xt_tnni2;Dr_tnni1c	0	0.74503	0.74503	Eukaryota	Dr_Skeletal muscle	Xt_Skeletal muscle
Dr_mfap4;Xt_LOC101731491	Dr_mfap4;Xt_MGC107908	0	0.742758	0.742758	Eukaryota
Dr_mfap4;Xt_LOC100488644	Dr_mfap4;Xt_MGC107908	0	0.742758	0.742758	Eukaryota
Dr_mfap4;Xt_LOC100488329	Dr_mfap4;Xt_MGC107908	0	0.742758	0.742758	Eukaryota
Dr_hbae1;Xt_hba-l3	Dr_hbae1;Xt_hbd	0.072172	0.813204	0.741032	Eukaryota	Dr_Blood	Xt_Blood
Xt_tnnt3;Dr_tnnt3b	Xt_tnnt3;Dr_tnnt1	0.0377091	0.77762	0.73991	Eukaryota	Dr_Skeletal muscle	Xt_Skeletal muscle
Dr_hmx4;Xt_soho1	Dr_hmx4;Xt_hmx1	0	0.737276	0.737276	Eukaryota	Dr_Eye primordium;Dr_Lens;Dr_Optic	Xt_Lens;Xt_Optic
Xt_hbz;Dr_si:ch211-5k11.6	Xt_hbz;Dr_zgc:163057	0	0.731305	0.731305	Eukaryota	Dr_Blood	Xt_Blood
Dr_hbae1;Xt_hba-l4	Dr_hbae1;Xt_hbd	0.0831047	0.813204	0.7301	Eukaryota	Dr_Blood	Xt_Blood
Xt_dnah1;Dr_LOC103911853	Xt_dnah1;Dr_dnah2	0	0.725814	0.725814	Eukaryota
Xt_dnah1;Dr_dnah1	Xt_dnah1;Dr_dnah2	0	0.725814	0.725814	Eukaryota
Dr_dnah2;Xt_Xetrov90027922m	Dr_dnah2;Xt_dnah1	0	0.725814	0.725814	Eukaryota
Xt_dnah1;Dr_LOC103911854	Xt_dnah1;Dr_dnah2	0	0.725814	0.725814	Eukaryota
Dr_si:ch211-5k11.2;Xt_hba-l4	Dr_si:ch211-5k11.2;Xt_hbd	0.0939991	0.812802	0.718803	Eukaryota	Dr_Blood	Xt_Blood
Xt_ehbp1l1-like;Dr_ehbp1l1b	Xt_ehbp1l1-like;Dr_actn3a	0	0.716793	0.716793	Eukaryota	Dr_Skeletal muscle	Xt_Skeletal muscle
Dr_actn3a;Xt_actn2	Dr_actn3a;Xt_ehbp1l1-like	0	0.716793	0.716793	Eukaryota	Dr_Skeletal muscle	Xt_Skeletal muscle
Xt_sox8;Dr_sox8a	Xt_sox8;Dr_sox10	0	0.715032	0.715032	Eukaryota	Dr_Neural crest	Xt_Neural crest
Xt_sox8;Dr_sox8b	Xt_sox8;Dr_sox10	0	0.715032	0.715032	Eukaryota	Dr_Neural crest	Xt_Neural crest
Xt_Xetrov90000734m;Dr_pdlim3a	Xt_Xetrov90000734m;Dr_synpo2lb	0	0.714786	0.714786	Eukaryota	Dr_Skeletal muscle	Xt_Skeletal muscle
Xt_Xetrov90000734m;Dr_pdlim3b	Xt_Xetrov90000734m;Dr_synpo2lb	0	0.714786	0.714786	Eukaryota	Dr_Skeletal muscle	Xt_Skeletal muscle
Dr_LOC100334599;Xt_hba-l4	Dr_LOC100334599;Xt_hbd	0.0934624	0.807997	0.714535	Eukaryota	Dr_Blood	Xt_Blood
Xt_LOC101734297-like;Dr_tll1	Xt_LOC101734297-like;Dr_he1b	0	0.711485	0.711485	Eukaryota	Dr_Hatching gland	Xt_Hatching gland
Xt_smyd1;Dr_smyd1a	Xt_smyd1;Dr_smyd2a	0	0.705759	0.705759	Eukaryota	Dr_Skeletal muscle	Xt_Skeletal muscle
Xt_LOC101734297-like;Dr_tll1	Xt_LOC101734297-like;Dr_he1a	0	0.704944	0.704944	Eukaryota	Dr_Hatching gland	Xt_Hatching gland
Dr_si:ch211-5k11.2;Xt_hba-l3	Dr_si:ch211-5k11.2;Xt_hbd	0.112317	0.812802	0.700486	Eukaryota	Dr_Blood	Xt_Blood
Xt_hba-l2;Dr_si:ch211-5k11.6	Xt_hba-l2;Dr_hbbe3	0	0.699084	0.699084	Eukaryota	Dr_Blood	Xt_Blood
Dr_LOC100334599;Xt_hba-l3	Dr_LOC100334599;Xt_hbd	0.115467	0.807997	0.69253	Eukaryota	Dr_Blood	Xt_Blood
Xt_hba3;Dr_hbaa1	Xt_hba3;Dr_hbbe3	0.263071	0.954636	0.691565	Eukaryota	Dr_Blood	Xt_Blood
Dr_LOC100006216;Xt_LOC100495499	Dr_LOC100006216;Xt_sp5l	0	0.691103	0.691103	Eukaryota	Dr_Dorsal organizer;Dr_Endoderm;Dr_Intermediate mesoderm;Dr_Involuting marginal zone;Dr_Notochord;Dr_Presomitic mesoderm	Xt_Endoderm;Xt_Involuting marginal zone;Xt_Notochord;Xt_Presomitic mesoderm;Xt_Spemann organizer;Xt_Tailbud
Dr_LOC100006216;Xt_LOC100496561	Dr_LOC100006216;Xt_sp5l	0	0.691103	0.691103	Eukaryota	Dr_Dorsal organizer;Dr_Endoderm;Dr_Intermediate mesoderm;Dr_Involuting marginal zone;Dr_Notochord;Dr_Presomitic mesoderm	Xt_Endoderm;Xt_Involuting marginal zone;Xt_Notochord;Xt_Presomitic mesoderm;Xt_Spemann organizer;Xt_Tailbud
Dr_LOC100006216;Xt_znf329	Dr_LOC100006216;Xt_sp5l	0	0.691103	0.691103	Eukaryota	Dr_Dorsal organizer;Dr_Endoderm;Dr_Intermediate mesoderm;Dr_Involuting marginal zone;Dr_Notochord;Dr_Presomitic mesoderm	Xt_Endoderm;Xt_Involuting marginal zone;Xt_Notochord;Xt_Presomitic mesoderm;Xt_Spemann organizer;Xt_Tailbud
Dr_LOC100006216;Xt_Xetrov90015419m	Dr_LOC100006216;Xt_sp5l	0	0.691103	0.691103	Eukaryota	Dr_Dorsal organizer;Dr_Endoderm;Dr_Intermediate mesoderm;Dr_Involuting marginal zone;Dr_Notochord;Dr_Presomitic mesoderm	Xt_Endoderm;Xt_Involuting marginal zone;Xt_Notochord;Xt_Presomitic mesoderm;Xt_Spemann organizer;Xt_Tailbud
Dr_LOC100006216;Xt_Xetrov90008367m	Dr_LOC100006216;Xt_sp5l	0	0.691103	0.691103	Eukaryota	Dr_Dorsal organizer;Dr_Endoderm;Dr_Intermediate mesoderm;Dr_Involuting marginal zone;Dr_Notochord;Dr_Presomitic mesoderm	Xt_Endoderm;Xt_Involuting marginal zone;Xt_Notochord;Xt_Presomitic mesoderm;Xt_Spemann organizer;Xt_Tailbud
Dr_LOC100006216;Xt_LOC100493966	Dr_LOC100006216;Xt_sp5l	0	0.691103	0.691103	Eukaryota	Dr_Dorsal organizer;Dr_Endoderm;Dr_Intermediate mesoderm;Dr_Involuting marginal zone;Dr_Notochord;Dr_Presomitic mesoderm	Xt_Endoderm;Xt_Involuting marginal zone;Xt_Notochord;Xt_Presomitic mesoderm;Xt_Spemann organizer;Xt_Tailbud
Dr_LOC100006216;Xt_LOC100497179-like	Dr_LOC100006216;Xt_sp5l	0	0.691103	0.691103	Eukaryota	Dr_Dorsal organizer;Dr_Endoderm;Dr_Intermediate mesoderm;Dr_Involuting marginal zone;Dr_Notochord;Dr_Presomitic mesoderm	Xt_Endoderm;Xt_Involuting marginal zone;Xt_Notochord;Xt_Presomitic mesoderm;Xt_Spemann organizer;Xt_Tailbud
Dr_LOC100006216;Xt_LOC100496403-like	Dr_LOC100006216;Xt_sp5l	0.000339647	0.691103	0.690764	Eukaryota	Dr_Dorsal organizer;Dr_Endoderm;Dr_Intermediate mesoderm;Dr_Involuting marginal zone;Dr_Notochord;Dr_Presomitic mesoderm	Xt_Endoderm;Xt_Involuting marginal zone;Xt_Notochord;Xt_Presomitic mesoderm;Xt_Spemann organizer;Xt_Tailbud
Dr_LOC100006216;Xt_Xetrov90001667m	Dr_LOC100006216;Xt_sp5l	0.00144481	0.691103	0.689659	Eukaryota	Dr_Dorsal organizer;Dr_Endoderm;Dr_Intermediate mesoderm;Dr_Involuting marginal zone;Dr_Notochord;Dr_Presomitic mesoderm	Xt_Endoderm;Xt_Involuting marginal zone;Xt_Notochord;Xt_Presomitic mesoderm;Xt_Spemann organizer;Xt_Tailbud
Dr_LOC100006216;Xt_znf250	Dr_LOC100006216;Xt_sp5l	0.00174912	0.691103	0.689354	Eukaryota	Dr_Dorsal organizer;Dr_Endoderm;Dr_Intermediate mesoderm;Dr_Involuting marginal zone;Dr_Notochord;Dr_Presomitic mesoderm	Xt_Endoderm;Xt_Involuting marginal zone;Xt_Notochord;Xt_Presomitic mesoderm;Xt_Spemann organizer;Xt_Tailbud
Dr_hbae1;Xt_hba2	Dr_hbae1;Xt_hbd	0.125083	0.813204	0.688121	Eukaryota	Dr_Blood	Xt_Blood
Dr_hbae3;Xt_hba-l4	Dr_hbae3;Xt_hbd	0.0893917	0.777392	0.688001	Eukaryota	Dr_Blood	Xt_Blood
Dr_LOC570015;Xt_LOC100497179-like	Dr_LOC570015;Xt_ctcf	0	0.687706	0.687706	Eukaryota	Dr_Dorsal organizer;Dr_Endoderm;Dr_Involuting marginal zone;Dr_Neuroectoderm;Dr_Non-neural ectoderm;Dr_Notochord	Xt_Endoderm;Xt_Involuting marginal zone;Xt_Neuroectoderm;Xt_Non-neural ectoderm;Xt_Spemann organizer
Dr_LOC570015;Xt_Xetrov90029323m	Dr_LOC570015;Xt_ctcf	0	0.687706	0.687706	Eukaryota	Dr_Dorsal organizer;Dr_Endoderm;Dr_Involuting marginal zone;Dr_Neuroectoderm;Dr_Non-neural ectoderm;Dr_Notochord	Xt_Endoderm;Xt_Involuting marginal zone;Xt_Neuroectoderm;Xt_Non-neural ectoderm;Xt_Spemann organizer
Dr_LOC570015;Xt_Xetrov90015419m	Dr_LOC570015;Xt_ctcf	0	0.687706	0.687706	Eukaryota	Dr_Dorsal organizer;Dr_Endoderm;Dr_Involuting marginal zone;Dr_Neuroectoderm;Dr_Non-neural ectoderm;Dr_Notochord	Xt_Endoderm;Xt_Involuting marginal zone;Xt_Neuroectoderm;Xt_Non-neural ectoderm;Xt_Spemann organizer
Dr_LOC570015;Xt_LOC100495499	Dr_LOC570015;Xt_ctcf	0	0.687706	0.687706	Eukaryota	Dr_Dorsal organizer;Dr_Endoderm;Dr_Involuting marginal zone;Dr_Neuroectoderm;Dr_Non-neural ectoderm;Dr_Notochord	Xt_Endoderm;Xt_Involuting marginal zone;Xt_Neuroectoderm;Xt_Non-neural ectoderm;Xt_Spemann organizer
Dr_LOC570015;Xt_Xetrov90001667m	Dr_LOC570015;Xt_ctcf	0	0.687706	0.687706	Eukaryota	Dr_Dorsal organizer;Dr_Endoderm;Dr_Involuting marginal zone;Dr_Neuroectoderm;Dr_Non-neural ectoderm;Dr_Notochord	Xt_Endoderm;Xt_Involuting marginal zone;Xt_Neuroectoderm;Xt_Non-neural ectoderm;Xt_Spemann organizer
Dr_LOC570015;Xt_LOC101735121-like	Dr_LOC570015;Xt_ctcf	0	0.687706	0.687706	Eukaryota	Dr_Dorsal organizer;Dr_Endoderm;Dr_Involuting marginal zone;Dr_Neuroectoderm;Dr_Non-neural ectoderm;Dr_Notochord	Xt_Endoderm;Xt_Involuting marginal zone;Xt_Neuroectoderm;Xt_Non-neural ectoderm;Xt_Spemann organizer
Dr_LOC570015;Xt_znf383	Dr_LOC570015;Xt_ctcf	0	0.687706	0.687706	Eukaryota	Dr_Dorsal organizer;Dr_Endoderm;Dr_Involuting marginal zone;Dr_Neuroectoderm;Dr_Non-neural ectoderm;Dr_Notochord	Xt_Endoderm;Xt_Involuting marginal zone;Xt_Neuroectoderm;Xt_Non-neural ectoderm;Xt_Spemann organizer
Dr_LOC570015;Xt_znf329	Dr_LOC570015;Xt_ctcf	0	0.687706	0.687706	Eukaryota	Dr_Dorsal organizer;Dr_Endoderm;Dr_Involuting marginal zone;Dr_Neuroectoderm;Dr_Non-neural ectoderm;Dr_Notochord	Xt_Endoderm;Xt_Involuting marginal zone;Xt_Neuroectoderm;Xt_Non-neural ectoderm;Xt_Spemann organizer
Dr_LOC570015;Xt_LOC100496561	Dr_LOC570015;Xt_ctcf	0	0.687706	0.687706	Eukaryota	Dr_Dorsal organizer;Dr_Endoderm;Dr_Involuting marginal zone;Dr_Neuroectoderm;Dr_Non-neural ectoderm;Dr_Notochord	Xt_Endoderm;Xt_Involuting marginal zone;Xt_Neuroectoderm;Xt_Non-neural ectoderm;Xt_Spemann organizer
Dr_LOC570015;Xt_znf250	Dr_LOC570015;Xt_ctcf	0	0.687706	0.687706	Eukaryota	Dr_Dorsal organizer;Dr_Endoderm;Dr_Involuting marginal zone;Dr_Neuroectoderm;Dr_Non-neural ectoderm;Dr_Notochord	Xt_Endoderm;Xt_Involuting marginal zone;Xt_Neuroectoderm;Xt_Non-neural ectoderm;Xt_Spemann organizer
Dr_LOC570015;Xt_LOC100496403-like	Dr_LOC570015;Xt_ctcf	0	0.687706	0.687706	Eukaryota	Dr_Dorsal organizer;Dr_Endoderm;Dr_Involuting marginal zone;Dr_Neuroectoderm;Dr_Non-neural ectoderm;Dr_Notochord	Xt_Endoderm;Xt_Involuting marginal zone;Xt_Neuroectoderm;Xt_Non-neural ectoderm;Xt_Spemann organizer
Dr_LOC570015;Xt_Xetrov90008367m	Dr_LOC570015;Xt_ctcf	0	0.687706	0.687706	Eukaryota	Dr_Dorsal organizer;Dr_Endoderm;Dr_Involuting marginal zone;Dr_Neuroectoderm;Dr_Non-neural ectoderm;Dr_Notochord	Xt_Endoderm;Xt_Involuting marginal zone;Xt_Neuroectoderm;Xt_Non-neural ectoderm;Xt_Spemann organizer
Dr_LOC570015;Xt_LOC100493966	Dr_LOC570015;Xt_ctcf	0	0.687706	0.687706	Eukaryota	Dr_Dorsal organizer;Dr_Endoderm;Dr_Involuting marginal zone;Dr_Neuroectoderm;Dr_Non-neural ectoderm;Dr_Notochord	Xt_Endoderm;Xt_Involuting marginal zone;Xt_Neuroectoderm;Xt_Non-neural ectoderm;Xt_Spemann organizer
Dr_LOC570015;Xt_Xetrov90015421m	Dr_LOC570015;Xt_ctcf	0	0.687706	0.687706	Eukaryota	Dr_Dorsal organizer;Dr_Endoderm;Dr_Involuting marginal zone;Dr_Neuroectoderm;Dr_Non-neural ectoderm;Dr_Notochord	Xt_Endoderm;Xt_Involuting marginal zone;Xt_Neuroectoderm;Xt_Non-neural ectoderm;Xt_Spemann organizer
Dr_LOC570015;Xt_LOC101734394	Dr_LOC570015;Xt_ctcf	0.00262063	0.687706	0.685086	Eukaryota	Dr_Dorsal organizer;Dr_Endoderm;Dr_Involuting marginal zone;Dr_Neuroectoderm;Dr_Non-neural ectoderm;Dr_Notochord	Xt_Endoderm;Xt_Involuting marginal zone;Xt_Neuroectoderm;Xt_Non-neural ectoderm;Xt_Spemann organizer
Dr_col9a1b;Xt_LOC101731071	Dr_col9a1b;Xt_Xetrov90016548m	0	0.684078	0.684078	Eukaryota	Dr_Notochord	Xt_Notochord
Dr_col9a1b;Xt_Xetrov90014310m	Dr_col9a1b;Xt_Xetrov90016548m	0	0.684078	0.684078	Eukaryota	Dr_Notochord	Xt_Notochord
Xt_hba-l2;Dr_si:ch211-5k11.6	Xt_hba-l2;Dr_MGC173646	0	0.684031	0.684031	Eukaryota	Dr_Blood	Xt_Blood
Dr_LOC100006216;Xt_Xetrov90029323m	Dr_LOC100006216;Xt_sp5l	0.00717816	0.691103	0.683925	Eukaryota	Dr_Dorsal organizer;Dr_Endoderm;Dr_Intermediate mesoderm;Dr_Involuting marginal zone;Dr_Notochord;Dr_Presomitic mesoderm	Xt_Endoderm;Xt_Involuting marginal zone;Xt_Notochord;Xt_Presomitic mesoderm;Xt_Spemann organizer;Xt_Tailbud
Dr_LOC100006216;Xt_LOC101734394	Dr_LOC100006216;Xt_sp5l	0.00719094	0.691103	0.683912	Eukaryota	Dr_Dorsal organizer;Dr_Endoderm;Dr_Intermediate mesoderm;Dr_Involuting marginal zone;Dr_Notochord;Dr_Presomitic mesoderm	Xt_Endoderm;Xt_Involuting marginal zone;Xt_Notochord;Xt_Presomitic mesoderm;Xt_Spemann organizer;Xt_Tailbud
Dr_LOC100006216;Xt_LOC101735121-like	Dr_LOC100006216;Xt_sp5l	0.00899431	0.691103	0.682109	Eukaryota	Dr_Dorsal organizer;Dr_Endoderm;Dr_Intermediate mesoderm;Dr_Involuting marginal zone;Dr_Notochord;Dr_Presomitic mesoderm	Xt_Endoderm;Xt_Involuting marginal zone;Xt_Notochord;Xt_Presomitic mesoderm;Xt_Spemann organizer;Xt_Tailbud
Xt_atp1b2;Dr_atp1b2a	Xt_atp1b2;Dr_atp1b1b	0	0.67595	0.67595	Eukaryota	Dr_Ionocyte;Dr_Rare epidermal subtypes	Xt_Goblet cell;Xt_Hatching gland;Xt_Ionocyte
Xt_atp1b2;Dr_atp1b2b	Xt_atp1b2;Dr_atp1b1b	0	0.67595	0.67595	Eukaryota	Dr_Ionocyte;Dr_Rare epidermal subtypes	Xt_Goblet cell;Xt_Hatching gland;Xt_Ionocyte
Dr_atp1b1b;Xt_atp1b1	Dr_atp1b1b;Xt_atp1b2	0.00188355	0.67595	0.674066	Eukaryota	Dr_Ionocyte;Dr_Rare epidermal subtypes	Xt_Goblet cell;Xt_Hatching gland;Xt_Ionocyte
Xt_hba-l2;Dr_si:ch211-5k11.6	Xt_hba-l2;Dr_hbbe1.1	0	0.673547	0.673547	Eukaryota	Dr_Blood	Xt_Blood
Dr_LOC100006216;Xt_znf383	Dr_LOC100006216;Xt_sp5l	0.0178327	0.691103	0.673271	Eukaryota	Dr_Dorsal organizer;Dr_Endoderm;Dr_Intermediate mesoderm;Dr_Involuting marginal zone;Dr_Notochord;Dr_Presomitic mesoderm	Xt_Endoderm;Xt_Involuting marginal zone;Xt_Notochord;Xt_Presomitic mesoderm;Xt_Spemann organizer;Xt_Tailbud
Dr_si:zfos-2330d3.3;Xt_LOC100488644	Dr_si:zfos-2330d3.3;Xt_MGC107908	0	0.669024	0.669024	Eukaryota
Dr_si:zfos-2330d3.3;Xt_LOC100488329	Dr_si:zfos-2330d3.3;Xt_MGC107908	0	0.669024	0.669024	Eukaryota
Dr_si:zfos-2330d3.3;Xt_LOC101731491	Dr_si:zfos-2330d3.3;Xt_MGC107908	0	0.669024	0.669024	Eukaryota
Dr_dmrt3a;Xt_dmrt3	Dr_dmrt3a;Xt_dmrta1	0	0.66671	0.66671	Eukaryota
Xt_myh2;Dr_LOC100537594	Xt_myh2;Dr_myhz2	0	0.665437	0.665437	Eukaryota	Dr_Skeletal muscle	Xt_Skeletal muscle
Xt_myh2;Dr_wu:fd14a01	Xt_myh2;Dr_myhz2	0	0.665437	0.665437	Eukaryota	Dr_Skeletal muscle	Xt_Skeletal muscle
Xt_myh2;Dr_zgc:66156	Xt_myh2;Dr_myhz2	0	0.665437	0.665437	Eukaryota	Dr_Skeletal muscle	Xt_Skeletal muscle
Xt_myh2;Dr_myhb	Xt_myh2;Dr_myhz2	0	0.665437	0.665437	Eukaryota	Dr_Skeletal muscle	Xt_Skeletal muscle
Dr_hbae3;Xt_hba-l3	Dr_hbae3;Xt_hbd	0.112611	0.777392	0.664781	Eukaryota	Dr_Blood	Xt_Blood
Dr_dnah2;Xt_Xetrov90027922m	Dr_dnah2;Xt_dnah7	0	0.659825	0.659825	Eukaryota
Dr_im:6909388;Xt_LOC100489385	Dr_im:6909388;Xt_morn5	0	0.657258	0.657258	Eukaryota
Xt_hba-l2;Dr_si:ch211-5k11.6	Xt_hba-l2;Dr_hbbe2	0	0.655404	0.655404	Eukaryota	Dr_Blood	Xt_Blood
Dr_zgc:171687;Xt_LOC100488644	Dr_zgc:171687;Xt_MGC107908	0	0.651663	0.651663	Eukaryota
Dr_zgc:171687;Xt_LOC101731491	Dr_zgc:171687;Xt_MGC107908	0	0.651663	0.651663	Eukaryota
Dr_zgc:171687;Xt_LOC100488329	Dr_zgc:171687;Xt_MGC107908	0	0.651663	0.651663	Eukaryota
Xt_LOC100486063;Dr_col6a6	Xt_LOC100486063;Dr_col14a1a	0	0.651051	0.651051	Eukaryota	Dr_Epidermal progenitor;Dr_Lens;Dr_Placodal area	Xt_Epidermal progenitor;Xt_Lens;Xt_Placodal area
Dr_col14a1a;Xt_col12a1	Dr_col14a1a;Xt_LOC100486063	0	0.651051	0.651051	Eukaryota	Dr_Epidermal progenitor;Dr_Lens;Dr_Placodal area	Xt_Epidermal progenitor;Xt_Lens;Xt_Placodal area
Xt_LOC100486063;Dr_LOC100535278	Xt_LOC100486063;Dr_col14a1a	0	0.651051	0.651051	Eukaryota	Dr_Epidermal progenitor;Dr_Lens;Dr_Placodal area	Xt_Epidermal progenitor;Xt_Lens;Xt_Placodal area
Xt_hba1;Dr_hbaa1	Xt_hba1;Dr_hbbe3	0	0.649916	0.649916	Eukaryota	Dr_Blood	Xt_Blood
Xt_hba1;Dr_si:ch211-5k11.6	Xt_hba1;Dr_hbbe3	0	0.649916	0.649916	Eukaryota	Dr_Blood	Xt_Blood
Dr_chrna1;Xt_chrna1	Dr_chrna1;Xt_chrng	0.252387	0.899923	0.647536	Eukaryota	Dr_Skeletal muscle	Xt_Skeletal muscle
Xt_col6a1;Dr_col6a1	Xt_col6a1;Dr_col7a1	0	0.647209	0.647209	Eukaryota	Dr_Epidermal progenitor;Dr_Placodal area	Xt_Epidermal progenitor
Dr_col7a1;Xt_Xetrov90012753m	Dr_col7a1;Xt_col6a1	0	0.647209	0.647209	Eukaryota	Dr_Epidermal progenitor;Dr_Placodal area	Xt_Epidermal progenitor
Dr_col7a1;Xt_Xetrov90012754m	Dr_col7a1;Xt_col6a1	0	0.647209	0.647209	Eukaryota	Dr_Epidermal progenitor;Dr_Placodal area	Xt_Epidermal progenitor
Dr_dlx5a;Xt_dlx5	Dr_dlx5a;Xt_dlx2	0	0.641791	0.641791	Eukaryota
Dr_chrna1;Xt_chrna1	Dr_chrna1;Xt_chrnd	0.252387	0.891403	0.639017	Eukaryota	Dr_Skeletal muscle	Xt_Skeletal muscle
Dr_im:6909388;Xt_LOC100489385	Dr_im:6909388;Xt_rsph10b-like	0	0.636739	0.636739	Eukaryota
Xt_chrng;Dr_chrne	Xt_chrng;Dr_chrna1	0.263603	0.899923	0.63632	Eukaryota	Dr_Skeletal muscle	Xt_Skeletal muscle
Dr_wu:fj11g02;Xt_LOC100488644	Dr_wu:fj11g02;Xt_MGC107908	0	0.636169	0.636169	Eukaryota
Dr_wu:fj11g02;Xt_LOC101731491	Dr_wu:fj11g02;Xt_MGC107908	0	0.636169	0.636169	Eukaryota
Dr_wu:fj11g02;Xt_LOC100488329	Dr_wu:fj11g02;Xt_MGC107908	0	0.636169	0.636169	Eukaryota
Xt_hba3;Dr_hbaa1	Xt_hba3;Dr_zgc:163057	0.263071	0.898187	0.635116	Eukaryota	Dr_Blood	Xt_Blood
Dr_LOC100334652;Xt_Xetrov90015421m	Dr_LOC100334652;Xt_sp5l	0	0.634089	0.634089	Eukaryota	Dr_Dorsal organizer;Dr_Endoderm;Dr_Intermediate mesoderm;Dr_Involuting marginal zone;Dr_Notochord;Dr_Presomitic mesoderm	Xt_Endoderm;Xt_Involuting marginal zone;Xt_Notochord;Xt_Presomitic mesoderm;Xt_Spemann organizer;Xt_Tailbud
Dr_LOC100334652;Xt_znf329	Dr_LOC100334652;Xt_sp5l	0	0.634089	0.634089	Eukaryota	Dr_Dorsal organizer;Dr_Endoderm;Dr_Intermediate mesoderm;Dr_Involuting marginal zone;Dr_Notochord;Dr_Presomitic mesoderm	Xt_Endoderm;Xt_Involuting marginal zone;Xt_Notochord;Xt_Presomitic mesoderm;Xt_Spemann organizer;Xt_Tailbud
Dr_LOC100334652;Xt_LOC100496561	Dr_LOC100334652;Xt_sp5l	0	0.634089	0.634089	Eukaryota	Dr_Dorsal organizer;Dr_Endoderm;Dr_Intermediate mesoderm;Dr_Involuting marginal zone;Dr_Notochord;Dr_Presomitic mesoderm	Xt_Endoderm;Xt_Involuting marginal zone;Xt_Notochord;Xt_Presomitic mesoderm;Xt_Spemann organizer;Xt_Tailbud
Dr_LOC100334652;Xt_LOC101735121-like	Dr_LOC100334652;Xt_sp5l	0	0.634089	0.634089	Eukaryota	Dr_Dorsal organizer;Dr_Endoderm;Dr_Intermediate mesoderm;Dr_Involuting marginal zone;Dr_Notochord;Dr_Presomitic mesoderm	Xt_Endoderm;Xt_Involuting marginal zone;Xt_Notochord;Xt_Presomitic mesoderm;Xt_Spemann organizer;Xt_Tailbud
Dr_LOC100334652;Xt_znf383	Dr_LOC100334652;Xt_sp5l	0	0.634089	0.634089	Eukaryota	Dr_Dorsal organizer;Dr_Endoderm;Dr_Intermediate mesoderm;Dr_Involuting marginal zone;Dr_Notochord;Dr_Presomitic mesoderm	Xt_Endoderm;Xt_Involuting marginal zone;Xt_Notochord;Xt_Presomitic mesoderm;Xt_Spemann organizer;Xt_Tailbud
Dr_LOC100334652;Xt_Xetrov90015419m	Dr_LOC100334652;Xt_sp5l	0	0.634089	0.634089	Eukaryota	Dr_Dorsal organizer;Dr_Endoderm;Dr_Intermediate mesoderm;Dr_Involuting marginal zone;Dr_Notochord;Dr_Presomitic mesoderm	Xt_Endoderm;Xt_Involuting marginal zone;Xt_Notochord;Xt_Presomitic mesoderm;Xt_Spemann organizer;Xt_Tailbud
Dr_LOC100334652;Xt_LOC100497179-like	Dr_LOC100334652;Xt_sp5l	0	0.634089	0.634089	Eukaryota	Dr_Dorsal organizer;Dr_Endoderm;Dr_Intermediate mesoderm;Dr_Involuting marginal zone;Dr_Notochord;Dr_Presomitic mesoderm	Xt_Endoderm;Xt_Involuting marginal zone;Xt_Notochord;Xt_Presomitic mesoderm;Xt_Spemann organizer;Xt_Tailbud
Dr_LOC100334652;Xt_znf250	Dr_LOC100334652;Xt_sp5l	0	0.634089	0.634089	Eukaryota	Dr_Dorsal organizer;Dr_Endoderm;Dr_Intermediate mesoderm;Dr_Involuting marginal zone;Dr_Notochord;Dr_Presomitic mesoderm	Xt_Endoderm;Xt_Involuting marginal zone;Xt_Notochord;Xt_Presomitic mesoderm;Xt_Spemann organizer;Xt_Tailbud
Dr_LOC100334652;Xt_Xetrov90029323m	Dr_LOC100334652;Xt_sp5l	0	0.634089	0.634089	Eukaryota	Dr_Dorsal organizer;Dr_Endoderm;Dr_Intermediate mesoderm;Dr_Involuting marginal zone;Dr_Notochord;Dr_Presomitic mesoderm	Xt_Endoderm;Xt_Involuting marginal zone;Xt_Notochord;Xt_Presomitic mesoderm;Xt_Spemann organizer;Xt_Tailbud
Dr_LOC100334652;Xt_LOC100496403-like	Dr_LOC100334652;Xt_sp5l	0	0.634089	0.634089	Eukaryota	Dr_Dorsal organizer;Dr_Endoderm;Dr_Intermediate mesoderm;Dr_Involuting marginal zone;Dr_Notochord;Dr_Presomitic mesoderm	Xt_Endoderm;Xt_Involuting marginal zone;Xt_Notochord;Xt_Presomitic mesoderm;Xt_Spemann organizer;Xt_Tailbud
Dr_LOC100334652;Xt_Xetrov90001667m	Dr_LOC100334652;Xt_sp5l	0	0.634089	0.634089	Eukaryota	Dr_Dorsal organizer;Dr_Endoderm;Dr_Intermediate mesoderm;Dr_Involuting marginal zone;Dr_Notochord;Dr_Presomitic mesoderm	Xt_Endoderm;Xt_Involuting marginal zone;Xt_Notochord;Xt_Presomitic mesoderm;Xt_Spemann organizer;Xt_Tailbud
Dr_LOC100334652;Xt_LOC100493966	Dr_LOC100334652;Xt_sp5l	0	0.634089	0.634089	Eukaryota	Dr_Dorsal organizer;Dr_Endoderm;Dr_Intermediate mesoderm;Dr_Involuting marginal zone;Dr_Notochord;Dr_Presomitic mesoderm	Xt_Endoderm;Xt_Involuting marginal zone;Xt_Notochord;Xt_Presomitic mesoderm;Xt_Spemann organizer;Xt_Tailbud
Dr_LOC100334652;Xt_Xetrov90008367m	Dr_LOC100334652;Xt_sp5l	0	0.634089	0.634089	Eukaryota	Dr_Dorsal organizer;Dr_Endoderm;Dr_Intermediate mesoderm;Dr_Involuting marginal zone;Dr_Notochord;Dr_Presomitic mesoderm	Xt_Endoderm;Xt_Involuting marginal zone;Xt_Notochord;Xt_Presomitic mesoderm;Xt_Spemann organizer;Xt_Tailbud
Dr_LOC100334652;Xt_LOC100495499	Dr_LOC100334652;Xt_sp5l	0	0.634089	0.634089	Eukaryota	Dr_Dorsal organizer;Dr_Endoderm;Dr_Intermediate mesoderm;Dr_Involuting marginal zone;Dr_Notochord;Dr_Presomitic mesoderm	Xt_Endoderm;Xt_Involuting marginal zone;Xt_Notochord;Xt_Presomitic mesoderm;Xt_Spemann organizer;Xt_Tailbud
Dr_LOC100334652;Xt_LOC101734394	Dr_LOC100334652;Xt_sp5l	0	0.634089	0.634089	Eukaryota	Dr_Dorsal organizer;Dr_Endoderm;Dr_Intermediate mesoderm;Dr_Involuting marginal zone;Dr_Notochord;Dr_Presomitic mesoderm	Xt_Endoderm;Xt_Involuting marginal zone;Xt_Notochord;Xt_Presomitic mesoderm;Xt_Spemann organizer;Xt_Tailbud
Xt_hba1;Dr_hbaa1	Xt_hba1;Dr_hbbe1.1	0	0.633576	0.633576	Eukaryota	Dr_Blood	Xt_Blood
Xt_hba1;Dr_si:ch211-5k11.6	Xt_hba1;Dr_hbbe1.1	0	0.633576	0.633576	Eukaryota	Dr_Blood	Xt_Blood
Xt_synpo2l;Dr_synpo2la	Xt_synpo2l;Dr_pdlim5b	0	0.63207	0.63207	Eukaryota
Dr_pdlim5b;Xt_pdlim5	Dr_pdlim5b;Xt_synpo2l	0	0.63207	0.63207	Eukaryota
Dr_col9a1b;Xt_Xetrov90014310m	Dr_col9a1b;Xt_LOC100497103	0	0.630911	0.630911	Eukaryota	Dr_Notochord	Xt_Notochord
Dr_col9a1b;Xt_LOC101731071	Dr_col9a1b;Xt_LOC100497103	0	0.630911	0.630911	Eukaryota	Dr_Notochord	Xt_Notochord
Xt_hba1;Dr_si:ch211-5k11.6	Xt_hba1;Dr_si:ch211-5k11.12	0	0.628301	0.628301	Eukaryota	Dr_Blood	Xt_Blood
Xt_hba1;Dr_hbaa1	Xt_hba1;Dr_si:ch211-5k11.12	0	0.628301	0.628301	Eukaryota	Dr_Blood	Xt_Blood
Xt_myf6;Dr_myf6	Xt_myf6;Dr_myod1	0	0.62608	0.62608	Eukaryota	Dr_Presomitic mesoderm;Dr_Skeletal muscle	Xt_Skeletal muscle
Dr_pax2a;Xt_pax5	Dr_pax2a;Xt_pax8	0	0.624296	0.624296	Eukaryota	Dr_Forebrain/midbrain;Dr_Otic placode;Dr_Placodal area	Xt_Otic placode;Xt_Placodal area;Xt_Pronephric mesenchyme
Dr_pax2a;Xt_pax2	Dr_pax2a;Xt_pax8	0	0.624296	0.624296	Eukaryota	Dr_Forebrain/midbrain;Dr_Otic placode;Dr_Placodal area	Xt_Otic placode;Xt_Placodal area;Xt_Pronephric mesenchyme
Xt_pax8;Dr_pax8	Xt_pax8;Dr_pax2a	0	0.624296	0.624296	Eukaryota	Dr_Forebrain/midbrain;Dr_Otic placode;Dr_Placodal area	Xt_Otic placode;Xt_Placodal area;Xt_Pronephric mesenchyme
Xt_dnah7;Dr_dnah7	Xt_dnah7;Dr_dnah2	0.0359341	0.659825	0.623891	Eukaryota
Dr_si:ch211-5k11.2;Xt_hba-l4	Dr_si:ch211-5k11.2;Xt_hbe1	0.0939991	0.716318	0.622319	Eukaryota	Dr_Blood	Xt_Blood
Dr_zgc:173915;Xt_LOC100488329	Dr_zgc:173915;Xt_fgl2	0	0.622257	0.622257	Eukaryota
Xt_fgl2;Dr_si:ch211-236c15.2	Xt_fgl2;Dr_zgc:173915	0	0.622257	0.622257	Eukaryota
Xt_fgl2;Dr_fgl2a	Xt_fgl2;Dr_zgc:173915	0	0.622257	0.622257	Eukaryota
Dr_zgc:173915;Xt_LOC101731491	Dr_zgc:173915;Xt_fgl2	0	0.622257	0.622257	Eukaryota
Dr_zgc:173915;Xt_LOC100488644	Dr_zgc:173915;Xt_fgl2	0	0.622257	0.622257	Eukaryota
Xt_dnah1;Dr_LOC103911852	Xt_dnah1;Dr_dnah2	0.104767	0.725814	0.621047	Eukaryota
Xt_fgl2;Dr_fgl2a	Xt_fgl2;Dr_mfap4	0	0.620639	0.620639	Eukaryota
Dr_mfap4;Xt_LOC101731491	Dr_mfap4;Xt_fgl2	0	0.620639	0.620639	Eukaryota
Dr_mfap4;Xt_LOC100488329	Dr_mfap4;Xt_fgl2	0	0.620639	0.620639	Eukaryota
Dr_mfap4;Xt_LOC100488644	Dr_mfap4;Xt_fgl2	0	0.620639	0.620639	Eukaryota
Xt_fgl2;Dr_si:ch211-236c15.2	Xt_fgl2;Dr_mfap4	0	0.620639	0.620639	Eukaryota
Dr_LOC100334599;Xt_hba-l4	Dr_LOC100334599;Xt_hbe1	0.0934624	0.713889	0.620426	Eukaryota	Dr_Blood	Xt_Blood
Dr_hbae1;Xt_hba-l3	Dr_hbae1;Xt_hbe1	0.072172	0.692286	0.620114	Eukaryota	Dr_Blood	Xt_Blood
Xt_dnah1;Dr_LOC103911854	Xt_dnah1;Dr_dnah5	0	0.617816	0.617816	Eukaryota
Xt_dnah1;Dr_dnah1	Xt_dnah1;Dr_dnah5	0	0.617816	0.617816	Eukaryota
Dr_dnah5;Xt_Xetrov90026166m	Dr_dnah5;Xt_dnah1	0	0.617816	0.617816	Eukaryota
Xt_dnah1;Dr_LOC103911853	Xt_dnah1;Dr_dnah5	0	0.617816	0.617816	Eukaryota
Dr_LOC557268;Xt_LOC100493966	Dr_LOC557268;Xt_sp5l	0	0.616497	0.616497	Eukaryota	Dr_Dorsal organizer;Dr_Endoderm;Dr_Intermediate mesoderm;Dr_Involuting marginal zone;Dr_Notochord;Dr_Presomitic mesoderm	Xt_Endoderm;Xt_Involuting marginal zone;Xt_Notochord;Xt_Presomitic mesoderm;Xt_Spemann organizer;Xt_Tailbud
Dr_LOC557268;Xt_Xetrov90015421m	Dr_LOC557268;Xt_sp5l	0	0.616497	0.616497	Eukaryota	Dr_Dorsal organizer;Dr_Endoderm;Dr_Intermediate mesoderm;Dr_Involuting marginal zone;Dr_Notochord;Dr_Presomitic mesoderm	Xt_Endoderm;Xt_Involuting marginal zone;Xt_Notochord;Xt_Presomitic mesoderm;Xt_Spemann organizer;Xt_Tailbud
Dr_LOC557268;Xt_Xetrov90015419m	Dr_LOC557268;Xt_sp5l	0	0.616497	0.616497	Eukaryota	Dr_Dorsal organizer;Dr_Endoderm;Dr_Intermediate mesoderm;Dr_Involuting marginal zone;Dr_Notochord;Dr_Presomitic mesoderm	Xt_Endoderm;Xt_Involuting marginal zone;Xt_Notochord;Xt_Presomitic mesoderm;Xt_Spemann organizer;Xt_Tailbud
Dr_LOC557268;Xt_znf383	Dr_LOC557268;Xt_sp5l	0	0.616497	0.616497	Eukaryota	Dr_Dorsal organizer;Dr_Endoderm;Dr_Intermediate mesoderm;Dr_Involuting marginal zone;Dr_Notochord;Dr_Presomitic mesoderm	Xt_Endoderm;Xt_Involuting marginal zone;Xt_Notochord;Xt_Presomitic mesoderm;Xt_Spemann organizer;Xt_Tailbud
Dr_LOC557268;Xt_Xetrov90008367m	Dr_LOC557268;Xt_sp5l	0	0.616497	0.616497	Eukaryota	Dr_Dorsal organizer;Dr_Endoderm;Dr_Intermediate mesoderm;Dr_Involuting marginal zone;Dr_Notochord;Dr_Presomitic mesoderm	Xt_Endoderm;Xt_Involuting marginal zone;Xt_Notochord;Xt_Presomitic mesoderm;Xt_Spemann organizer;Xt_Tailbud
Dr_LOC557268;Xt_LOC100496561	Dr_LOC557268;Xt_sp5l	0	0.616497	0.616497	Eukaryota	Dr_Dorsal organizer;Dr_Endoderm;Dr_Intermediate mesoderm;Dr_Involuting marginal zone;Dr_Notochord;Dr_Presomitic mesoderm	Xt_Endoderm;Xt_Involuting marginal zone;Xt_Notochord;Xt_Presomitic mesoderm;Xt_Spemann organizer;Xt_Tailbud
Dr_LOC557268;Xt_Xetrov90029323m	Dr_LOC557268;Xt_sp5l	0	0.616497	0.616497	Eukaryota	Dr_Dorsal organizer;Dr_Endoderm;Dr_Intermediate mesoderm;Dr_Involuting marginal zone;Dr_Notochord;Dr_Presomitic mesoderm	Xt_Endoderm;Xt_Involuting marginal zone;Xt_Notochord;Xt_Presomitic mesoderm;Xt_Spemann organizer;Xt_Tailbud
Dr_LOC557268;Xt_LOC100495499	Dr_LOC557268;Xt_sp5l	0	0.616497	0.616497	Eukaryota	Dr_Dorsal organizer;Dr_Endoderm;Dr_Intermediate mesoderm;Dr_Involuting marginal zone;Dr_Notochord;Dr_Presomitic mesoderm	Xt_Endoderm;Xt_Involuting marginal zone;Xt_Notochord;Xt_Presomitic mesoderm;Xt_Spemann organizer;Xt_Tailbud
Dr_LOC557268;Xt_LOC101734394	Dr_LOC557268;Xt_sp5l	0	0.616497	0.616497	Eukaryota	Dr_Dorsal organizer;Dr_Endoderm;Dr_Intermediate mesoderm;Dr_Involuting marginal zone;Dr_Notochord;Dr_Presomitic mesoderm	Xt_Endoderm;Xt_Involuting marginal zone;Xt_Notochord;Xt_Presomitic mesoderm;Xt_Spemann organizer;Xt_Tailbud
Dr_LOC557268;Xt_LOC100497179-like	Dr_LOC557268;Xt_sp5l	0	0.616497	0.616497	Eukaryota	Dr_Dorsal organizer;Dr_Endoderm;Dr_Intermediate mesoderm;Dr_Involuting marginal zone;Dr_Notochord;Dr_Presomitic mesoderm	Xt_Endoderm;Xt_Involuting marginal zone;Xt_Notochord;Xt_Presomitic mesoderm;Xt_Spemann organizer;Xt_Tailbud
Dr_LOC557268;Xt_znf329	Dr_LOC557268;Xt_sp5l	0	0.616497	0.616497	Eukaryota	Dr_Dorsal organizer;Dr_Endoderm;Dr_Intermediate mesoderm;Dr_Involuting marginal zone;Dr_Notochord;Dr_Presomitic mesoderm	Xt_Endoderm;Xt_Involuting marginal zone;Xt_Notochord;Xt_Presomitic mesoderm;Xt_Spemann organizer;Xt_Tailbud
Dr_LOC557268;Xt_Xetrov90001667m	Dr_LOC557268;Xt_sp5l	0	0.616497	0.616497	Eukaryota	Dr_Dorsal organizer;Dr_Endoderm;Dr_Intermediate mesoderm;Dr_Involuting marginal zone;Dr_Notochord;Dr_Presomitic mesoderm	Xt_Endoderm;Xt_Involuting marginal zone;Xt_Notochord;Xt_Presomitic mesoderm;Xt_Spemann organizer;Xt_Tailbud
Dr_LOC557268;Xt_znf250	Dr_LOC557268;Xt_sp5l	0	0.616497	0.616497	Eukaryota	Dr_Dorsal organizer;Dr_Endoderm;Dr_Intermediate mesoderm;Dr_Involuting marginal zone;Dr_Notochord;Dr_Presomitic mesoderm	Xt_Endoderm;Xt_Involuting marginal zone;Xt_Notochord;Xt_Presomitic mesoderm;Xt_Spemann organizer;Xt_Tailbud
Dr_LOC557268;Xt_LOC101735121-like	Dr_LOC557268;Xt_sp5l	0	0.616497	0.616497	Eukaryota	Dr_Dorsal organizer;Dr_Endoderm;Dr_Intermediate mesoderm;Dr_Involuting marginal zone;Dr_Notochord;Dr_Presomitic mesoderm	Xt_Endoderm;Xt_Involuting marginal zone;Xt_Notochord;Xt_Presomitic mesoderm;Xt_Spemann organizer;Xt_Tailbud
Dr_LOC557268;Xt_LOC100496403-like	Dr_LOC557268;Xt_sp5l	0	0.616497	0.616497	Eukaryota	Dr_Dorsal organizer;Dr_Endoderm;Dr_Intermediate mesoderm;Dr_Involuting marginal zone;Dr_Notochord;Dr_Presomitic mesoderm	Xt_Endoderm;Xt_Involuting marginal zone;Xt_Notochord;Xt_Presomitic mesoderm;Xt_Spemann organizer;Xt_Tailbud
Xt_fkbp10;Dr_fkbp10a	Xt_fkbp10;Dr_fkbp9	0	0.61631	0.61631	Eukaryota	Dr_Endothelial;Dr_Epidermal progenitor;Dr_Intermediate mesoderm;Dr_Notochord;Dr_Notoplate;Dr_Placodal area;Dr_Presomitic mesoderm	Xt_Endothelial;Xt_Epidermal progenitor;Xt_Intermediate mesoderm;Xt_Notochord;Xt_Notoplate;Xt_Presomitic mesoderm;Xt_Skeletal muscle
Xt_dnah1;Dr_LOC103911853	Xt_dnah1;Dr_dnah6	0	0.615417	0.615417	Eukaryota
Xt_dnah1;Dr_LOC103911854	Xt_dnah1;Dr_dnah6	0	0.615417	0.615417	Eukaryota
Xt_dnah1;Dr_dnah1	Xt_dnah1;Dr_dnah6	0	0.615417	0.615417	Eukaryota
Xt_hba-l5;Dr_hbaa1	Xt_hba-l5;Dr_MGC173646	0.237681	0.849482	0.611801	Eukaryota	Dr_Blood	Xt_Blood
Dr_hbae1;Xt_hba-l4	Dr_hbae1;Xt_hbe1	0.0831047	0.692286	0.609181	Eukaryota	Dr_Blood	Xt_Blood
Xt_bmp7.2;Dr_bmp7a	Xt_bmp7.2;Dr_gdf3	0	0.607541	0.607541	Eukaryota	Dr_Blastula;Dr_Involuting marginal zone;Dr_Neuroectoderm;Dr_Non-neural ectoderm	Xt_Blastula;Xt_Involuting marginal zone;Xt_Neuroectoderm;Xt_Non-neural ectoderm
Xt_bmp7.2;Dr_bmp7b	Xt_bmp7.2;Dr_gdf3	0	0.607541	0.607541	Eukaryota	Dr_Blastula;Dr_Involuting marginal zone;Dr_Neuroectoderm;Dr_Non-neural ectoderm	Xt_Blastula;Xt_Involuting marginal zone;Xt_Neuroectoderm;Xt_Non-neural ectoderm
Xt_hba-l5;Dr_hbaa1	Xt_hba-l5;Dr_si:ch211-5k11.12	0.237681	0.843407	0.605726	Eukaryota	Dr_Blood	Xt_Blood
Dr_si:ch211-5k11.2;Xt_hba-l3	Dr_si:ch211-5k11.2;Xt_hbe1	0.112317	0.716318	0.604001	Eukaryota	Dr_Blood	Xt_Blood
Dr_fzd8b;Xt_fzd5	Dr_fzd8b;Xt_frzb2	0	0.601966	0.601966	Eukaryota	Dr_Dorsal organizer;Dr_Forebrain/midbrain	Xt_Pronephric mesenchyme;Xt_Spemann organizer
Xt_frzb2;Dr_LOC101884738	Xt_frzb2;Dr_fzd8b	0	0.601966	0.601966	Eukaryota	Dr_Dorsal organizer;Dr_Forebrain/midbrain	Xt_Pronephric mesenchyme;Xt_Spemann organizer
Dr_pax5;Xt_pax2	Dr_pax5;Xt_pax8	0	0.600921	0.600921	Eukaryota	Dr_Forebrain/midbrain	Xt_Pronephric mesenchyme
Dr_pax5;Xt_pax5	Dr_pax5;Xt_pax8	0	0.600921	0.600921	Eukaryota	Dr_Forebrain/midbrain	Xt_Pronephric mesenchyme
Xt_pax8;Dr_pax8	Xt_pax8;Dr_pax5	0	0.600921	0.600921	Eukaryota	Dr_Forebrain/midbrain	Xt_Pronephric mesenchyme
Xt_hba-l5;Dr_hbaa1	Xt_hba-l5;Dr_hbbe3	0.237681	0.837907	0.600226	Eukaryota	Dr_Blood	Xt_Blood
Dr_si:ch211-5k11.2;Xt_hba2	Dr_si:ch211-5k11.2;Xt_hbd	0.213684	0.812802	0.599119	Eukaryota	Dr_Blood	Xt_Blood
Dr_LOC100334599;Xt_hba-l3	Dr_LOC100334599;Xt_hbe1	0.115467	0.713889	0.598422	Eukaryota	Dr_Blood	Xt_Blood
Xt_hba1;Dr_hbaa1	Xt_hba1;Dr_MGC173646	0	0.59729	0.59729	Eukaryota	Dr_Blood	Xt_Blood
Xt_hba1;Dr_si:ch211-5k11.6	Xt_hba1;Dr_MGC173646	0	0.59729	0.59729	Eukaryota	Dr_Blood	Xt_Blood
Dr_hbae3;Xt_hba-l4	Dr_hbae3;Xt_hbe1	0.0893917	0.686507	0.597115	Eukaryota	Dr_Blood	Xt_Blood
Xt_hba-l5;Dr_hbaa1	Xt_hba-l5;Dr_hbbe2	0.237681	0.833071	0.59539	Eukaryota	Dr_Blood	Xt_Blood
Xt_fkbp10;Dr_fkbp10a	Xt_fkbp10;Dr_fkbp7	0	0.594776	0.594776	Eukaryota	Dr_Epidermal progenitor;Dr_Intermediate mesoderm;Dr_Notochord;Dr_Placodal area;Dr_Presomitic mesoderm	Xt_Endothelial;Xt_Epidermal progenitor;Xt_Intermediate mesoderm;Xt_Notochord;Xt_Presomitic mesoderm;Xt_Skeletal muscle
Xt_hbz;Dr_hbaa1	Xt_hbz;Dr_hbbe3	0.217074	0.810858	0.593784	Eukaryota	Dr_Blood	Xt_Blood
Xt_dpysl4;Dr_dpysl4	Xt_dpysl4;Dr_dpysl3	0	0.593735	0.593735	Eukaryota	Dr_Neuron;Dr_Rohon-beard neuron	Xt_Neuron;Xt_Rohon-beard neuron
Dr_zgc:113886;Xt_LOC101734394	Dr_zgc:113886;Xt_znf518b	0	0.593618	0.593618	Eukaryota	Dr_Blastula	Xt_Blastula
Dr_zgc:113886;Xt_znf383	Dr_zgc:113886;Xt_znf518b	0	0.593618	0.593618	Eukaryota	Dr_Blastula	Xt_Blastula
Dr_zgc:113886;Xt_znf250	Dr_zgc:113886;Xt_znf518b	0	0.593618	0.593618	Eukaryota	Dr_Blastula	Xt_Blastula
Dr_zgc:113886;Xt_Xetrov90008367m	Dr_zgc:113886;Xt_znf518b	0	0.593618	0.593618	Eukaryota	Dr_Blastula	Xt_Blastula
Dr_zgc:113886;Xt_LOC100493966	Dr_zgc:113886;Xt_znf518b	0	0.593618	0.593618	Eukaryota	Dr_Blastula	Xt_Blastula
Dr_zgc:113886;Xt_Xetrov90029323m	Dr_zgc:113886;Xt_znf518b	0	0.593618	0.593618	Eukaryota	Dr_Blastula	Xt_Blastula
Dr_zgc:113886;Xt_LOC101735121-like	Dr_zgc:113886;Xt_znf518b	0	0.593618	0.593618	Eukaryota	Dr_Blastula	Xt_Blastula
Dr_zgc:113886;Xt_Xetrov90015421m	Dr_zgc:113886;Xt_znf518b	0	0.593618	0.593618	Eukaryota	Dr_Blastula	Xt_Blastula
Dr_zgc:113886;Xt_znf329	Dr_zgc:113886;Xt_znf518b	0	0.593618	0.593618	Eukaryota	Dr_Blastula	Xt_Blastula
Dr_zgc:113886;Xt_Xetrov90001667m	Dr_zgc:113886;Xt_znf518b	0	0.593618	0.593618	Eukaryota	Dr_Blastula	Xt_Blastula
Dr_zgc:113886;Xt_LOC100496403-like	Dr_zgc:113886;Xt_znf518b	0	0.593618	0.593618	Eukaryota	Dr_Blastula	Xt_Blastula
Dr_zgc:113886;Xt_LOC100496561	Dr_zgc:113886;Xt_znf518b	0	0.593618	0.593618	Eukaryota	Dr_Blastula	Xt_Blastula
Dr_col7a1;Xt_Xetrov90012754m	Dr_col7a1;Xt_LOC100486063	0	0.593488	0.593488	Eukaryota	Dr_Epidermal progenitor;Dr_Placodal area	Xt_Epidermal progenitor;Xt_Placodal area
Dr_col7a1;Xt_Xetrov90012753m	Dr_col7a1;Xt_LOC100486063	0	0.593488	0.593488	Eukaryota	Dr_Epidermal progenitor;Dr_Placodal area	Xt_Epidermal progenitor;Xt_Placodal area
Xt_LOC100486063;Dr_LOC100535278	Xt_LOC100486063;Dr_col7a1	0	0.593488	0.593488	Eukaryota	Dr_Epidermal progenitor;Dr_Placodal area	Xt_Epidermal progenitor;Xt_Placodal area
Xt_LOC100486063;Dr_col6a6	Xt_LOC100486063;Dr_col7a1	0	0.593488	0.593488	Eukaryota	Dr_Epidermal progenitor;Dr_Placodal area	Xt_Epidermal progenitor;Xt_Placodal area
Dr_dpysl5a;Xt_dpysl5	Dr_dpysl5a;Xt_dpysl3	0	0.593108	0.593108	Eukaryota	Dr_Forebrain/midbrain;Dr_Hindbrain;Dr_Neuron;Dr_Rohon-beard neuron	Xt_Eye primordium;Xt_Forebrain/midbrain;Xt_Hindbrain;Xt_Neuron;Xt_Rohon-beard neuron
Dr_hoxb9a;Xt_hoxb9	Dr_hoxb9a;Xt_hoxc10	0.0703406	0.663438	0.593097	Eukaryota	Dr_Presomitic mesoderm;Dr_Tailbud	Xt_Presomitic mesoderm;Xt_Skeletal muscle;Xt_Tailbud
Dr_LOC100538028;Xt_LOC100488644	Dr_LOC100538028;Xt_MGC107908	0	0.591465	0.591465	Eukaryota
Dr_LOC100538028;Xt_LOC100488329	Dr_LOC100538028;Xt_MGC107908	0	0.591465	0.591465	Eukaryota
Dr_LOC100538028;Xt_LOC101731491	Dr_LOC100538028;Xt_MGC107908	0	0.591465	0.591465	Eukaryota
Dr_foxh1;Xt_foxh1.2	Dr_foxh1;Xt_foxi4.2	0	0.591096	0.591096	Eukaryota	Dr_Neuroectoderm;Dr_Non-neural ectoderm	Xt_Neuroectoderm;Xt_Non-neural ectoderm
Xt_anxa2;Dr_anxa2b	Xt_anxa2;Dr_anxa11b	0.0975184	0.68745	0.589931	Eukaryota	Dr_Endoderm;Dr_Epidermal progenitor;Dr_Ionocyte;Dr_Lens;Dr_Otic placode;Dr_Placodal area;Dr_Rare epidermal subtypes;Dr_Secretory epidermal	Xt_Cement gland primordium;Xt_Epidermal progenitor;Xt_Goblet cell;Xt_Hatching gland;Xt_Ionocyte;Xt_Lens;Xt_Otic placode;Xt_Placodal area;Xt_Small secretory cells
Dr_myod1;Xt_myod1	Dr_myod1;Xt_myog	0.056464	0.645687	0.589223	Eukaryota	Dr_Presomitic mesoderm;Dr_Skeletal muscle	Xt_Skeletal muscle
Dr_zgc:113886;Xt_LOC100496561	Dr_zgc:113886;Xt_bcl6	0	0.589105	0.589105	Eukaryota	Dr_Blastula	Xt_Blastula
Dr_zgc:113886;Xt_LOC101734394	Dr_zgc:113886;Xt_bcl6	0	0.589105	0.589105	Eukaryota	Dr_Blastula	Xt_Blastula
Dr_zgc:113886;Xt_LOC100496403-like	Dr_zgc:113886;Xt_bcl6	0	0.589105	0.589105	Eukaryota	Dr_Blastula	Xt_Blastula
Dr_zgc:113886;Xt_Xetrov90029323m	Dr_zgc:113886;Xt_bcl6	0	0.589105	0.589105	Eukaryota	Dr_Blastula	Xt_Blastula
Dr_zgc:113886;Xt_Xetrov90008367m	Dr_zgc:113886;Xt_bcl6	0	0.589105	0.589105	Eukaryota	Dr_Blastula	Xt_Blastula
Dr_zgc:113886;Xt_LOC101735121-like	Dr_zgc:113886;Xt_bcl6	0	0.589105	0.589105	Eukaryota	Dr_Blastula	Xt_Blastula
Dr_zgc:113886;Xt_znf250	Dr_zgc:113886;Xt_bcl6	0	0.589105	0.589105	Eukaryota	Dr_Blastula	Xt_Blastula
Dr_zgc:113886;Xt_znf383	Dr_zgc:113886;Xt_bcl6	0	0.589105	0.589105	Eukaryota	Dr_Blastula	Xt_Blastula
Dr_zgc:113886;Xt_znf329	Dr_zgc:113886;Xt_bcl6	0	0.589105	0.589105	Eukaryota	Dr_Blastula	Xt_Blastula
Dr_zgc:113886;Xt_Xetrov90001667m	Dr_zgc:113886;Xt_bcl6	0	0.589105	0.589105	Eukaryota	Dr_Blastula	Xt_Blastula
Dr_zgc:113886;Xt_Xetrov90015421m	Dr_zgc:113886;Xt_bcl6	0	0.589105	0.589105	Eukaryota	Dr_Blastula	Xt_Blastula
Dr_zgc:113886;Xt_LOC100493966	Dr_zgc:113886;Xt_bcl6	0	0.589105	0.589105	Eukaryota	Dr_Blastula	Xt_Blastula
Xt_bcl6;Dr_bcl6a	Xt_bcl6;Dr_zgc:113886	0	0.589105	0.589105	Eukaryota	Dr_Blastula	Xt_Blastula
Dr_LOC100334599;Xt_hba2	Dr_LOC100334599;Xt_hbd	0.219352	0.807997	0.588644	Eukaryota	Dr_Blood	Xt_Blood
Xt_klhl30;Dr_klhl30	Xt_klhl30;Dr_klhl41b	0	0.588628	0.588628	Eukaryota	Dr_Skeletal muscle	Xt_Skeletal muscle
Dr_hbae1;Xt_hba-l3	Dr_hbae1;Xt_LOC100216007	0.072172	0.659718	0.587546	Eukaryota	Dr_Blood	Xt_Blood
Dr_LOC103909603;Xt_LOC100497284-like	Dr_LOC103909603;Xt_capn13	0	0.587167	0.587167	Eukaryota	Dr_Epidermal progenitor;Dr_Ionocyte;Dr_Placodal area;Dr_Rare epidermal subtypes;Dr_Secretory epidermal	Xt_Cement gland primordium;Xt_Epidermal progenitor;Xt_Goblet cell;Xt_Hatching gland;Xt_Ionocyte;Xt_Placodal area;Xt_Small secretory cells
Dr_LOC103909603;Xt_LOC101730581	Dr_LOC103909603;Xt_capn13	0	0.587167	0.587167	Eukaryota	Dr_Epidermal progenitor;Dr_Ionocyte;Dr_Placodal area;Dr_Rare epidermal subtypes;Dr_Secretory epidermal	Xt_Cement gland primordium;Xt_Epidermal progenitor;Xt_Goblet cell;Xt_Hatching gland;Xt_Ionocyte;Xt_Placodal area;Xt_Small secretory cells
Dr_LOC103909603;Xt_Xetrov90013012m	Dr_LOC103909603;Xt_capn13	0	0.587167	0.587167	Eukaryota	Dr_Epidermal progenitor;Dr_Ionocyte;Dr_Placodal area;Dr_Rare epidermal subtypes;Dr_Secretory epidermal	Xt_Cement gland primordium;Xt_Epidermal progenitor;Xt_Goblet cell;Xt_Hatching gland;Xt_Ionocyte;Xt_Placodal area;Xt_Small secretory cells
Dr_LOC103909603;Xt_LOC101731595	Dr_LOC103909603;Xt_capn13	0	0.587167	0.587167	Eukaryota	Dr_Epidermal progenitor;Dr_Ionocyte;Dr_Placodal area;Dr_Rare epidermal subtypes;Dr_Secretory epidermal	Xt_Cement gland primordium;Xt_Epidermal progenitor;Xt_Goblet cell;Xt_Hatching gland;Xt_Ionocyte;Xt_Placodal area;Xt_Small secretory cells
Dr_LOC103909603;Xt_capn2	Dr_LOC103909603;Xt_capn13	0	0.587167	0.587167	Eukaryota	Dr_Epidermal progenitor;Dr_Ionocyte;Dr_Placodal area;Dr_Rare epidermal subtypes;Dr_Secretory epidermal	Xt_Cement gland primordium;Xt_Epidermal progenitor;Xt_Goblet cell;Xt_Hatching gland;Xt_Ionocyte;Xt_Placodal area;Xt_Small secretory cells
Dr_LOC103909603;Xt_capn8	Dr_LOC103909603;Xt_capn13	0	0.587167	0.587167	Eukaryota	Dr_Epidermal progenitor;Dr_Ionocyte;Dr_Placodal area;Dr_Rare epidermal subtypes;Dr_Secretory epidermal	Xt_Cement gland primordium;Xt_Epidermal progenitor;Xt_Goblet cell;Xt_Hatching gland;Xt_Ionocyte;Xt_Placodal area;Xt_Small secretory cells
Xt_hbz;Dr_hbaa1	Xt_hbz;Dr_MGC173646	0.217074	0.803561	0.586487	Eukaryota	Dr_Blood	Xt_Blood
Xt_myh4;Dr_zgc:66156	Xt_myh4;Dr_myhz1.2	0	0.585475	0.585475	Eukaryota
Xt_myh4;Dr_LOC100537594	Xt_myh4;Dr_myhz1.2	0	0.585475	0.585475	Eukaryota
Xt_myh4;Dr_myhb	Xt_myh4;Dr_myhz1.2	0	0.585475	0.585475	Eukaryota
Xt_myh4;Dr_wu:fd14a01	Xt_myh4;Dr_myhz1.2	0	0.585475	0.585475	Eukaryota
Xt_tnni1.2;Dr_zgc:112242	Xt_tnni1.2;Dr_tnni1c	0	0.584494	0.584494	Eukaryota	Dr_Skeletal muscle	Xt_Skeletal muscle
Xt_lamp1;Dr_lamp1	Xt_lamp1;Dr_lamp2	0	0.581469	0.581469	Eukaryota	Dr_Blastula;Dr_Dorsal organizer;Dr_Involuting marginal zone;Dr_Neuroectoderm;Dr_Notochord	Xt_Blastula;Xt_Involuting marginal zone;Xt_Neuroectoderm;Xt_Non-neural ectoderm;Xt_Notochord;Xt_Spemann organizer
Xt_synpo2l;Dr_synpo2la	Xt_synpo2l;Dr_ldb3b	0	0.580076	0.580076	Eukaryota	Dr_Skeletal muscle	Xt_Skeletal muscle
Xt_tnni2;Dr_tnni2a.1	Xt_tnni2;Dr_tnni1al	0	0.578175	0.578175	Eukaryota
Dr_hbae1;Xt_hba-l4	Dr_hbae1;Xt_LOC100216007	0.0831047	0.659718	0.576613	Eukaryota	Dr_Blood	Xt_Blood
Dr_fzd8b;Xt_fzd5	Dr_fzd8b;Xt_frzb	0	0.575897	0.575897	Eukaryota	Dr_Dorsal organizer	Xt_Spemann organizer
Dr_hbae3;Xt_hba-l3	Dr_hbae3;Xt_hbe1	0.112611	0.686507	0.573895	Eukaryota	Dr_Blood	Xt_Blood
Xt_myh8-like;Dr_wu:fd14a01	Xt_myh8-like;Dr_myhz1.2	0	0.572046	0.572046	Eukaryota
Xt_myh8-like;Dr_zgc:66156	Xt_myh8-like;Dr_myhz1.2	0	0.572046	0.572046	Eukaryota
Xt_myh8-like;Dr_myhb	Xt_myh8-like;Dr_myhz1.2	0	0.572046	0.572046	Eukaryota
Xt_myh8-like;Dr_LOC100537594	Xt_myh8-like;Dr_myhz1.2	0	0.572046	0.572046	Eukaryota
Xt_hba1;Dr_si:xx-by187g17.1	Xt_hba1;Dr_hbbe3	0.0781391	0.649916	0.571777	Eukaryota	Dr_Blood	Xt_Blood
Xt_anxa2;Dr_anxa2b	Xt_anxa2;Dr_LOC103908630	0.0975184	0.66881	0.571291	Eukaryota	Dr_Endoderm;Dr_Epidermal progenitor;Dr_Ionocyte;Dr_Lens;Dr_Otic placode;Dr_Placodal area;Dr_Rare epidermal subtypes;Dr_Secretory epidermal	Xt_Cement gland primordium;Xt_Epidermal progenitor;Xt_Goblet cell;Xt_Hatching gland;Xt_Ionocyte;Xt_Lens;Xt_Otic placode;Xt_Placodal area;Xt_Small secretory cells
Xt_hba1;Dr_hbaa1	Xt_hba1;Dr_hbbe2	0	0.570562	0.570562	Eukaryota	Dr_Blood	Xt_Blood
Xt_hba1;Dr_si:ch211-5k11.6	Xt_hba1;Dr_hbbe2	0	0.570562	0.570562	Eukaryota	Dr_Blood	Xt_Blood
Dr_hoxa13a;Xt_hoxa13	Dr_hoxa13a;Xt_hoxc10	0	0.570099	0.570099	Eukaryota	Dr_Presomitic mesoderm	Xt_Presomitic mesoderm;Xt_Skeletal muscle;Xt_Tailbud
Xt_hba-l5;Dr_hbaa1	Xt_hba-l5;Dr_hbbe1.1	0.237681	0.807584	0.569903	Eukaryota	Dr_Blood	Xt_Blood
Dr_myod1;Xt_myod1	Dr_myod1;Xt_myf6	0.056464	0.62608	0.569616	Eukaryota	Dr_Presomitic mesoderm;Dr_Skeletal muscle	Xt_Skeletal muscle
Dr_LOC100334599;Xt_hba-l4	Dr_LOC100334599;Xt_LOC100216007	0.0934624	0.661779	0.568317	Eukaryota	Dr_Blood	Xt_Blood
Xt_rasip1-like;Dr_radil	Xt_rasip1-like;Dr_rasip1	0	0.568216	0.568216	Eukaryota
Xt_rasip1-like;Dr_si:ch73-281f12.4	Xt_rasip1-like;Dr_rasip1	0	0.568216	0.568216	Eukaryota
Xt_rasip1-like;Dr_LOC572157	Xt_rasip1-like;Dr_rasip1	0	0.568216	0.568216	Eukaryota
Xt_hbz;Dr_hbaa1	Xt_hbz;Dr_hbbe2	0.217074	0.784656	0.567582	Eukaryota	Dr_Blood	Xt_Blood
Dr_si:ch211-5k11.2;Xt_hba-l4	Dr_si:ch211-5k11.2;Xt_LOC100216007	0.0939991	0.661375	0.567376	Eukaryota	Dr_Blood	Xt_Blood
Dr_hbae1;Xt_hba2	Dr_hbae1;Xt_hbe1	0.125083	0.692286	0.567202	Eukaryota	Dr_Blood	Xt_Blood
Dr_LOC100334599;Xt_hba-l4	Dr_LOC100334599;Xt_LOC100037901	0.0934624	0.659554	0.566092	Eukaryota	Dr_Blood	Xt_Blood
Xt_hbz;Dr_hbaa1	Xt_hbz;Dr_hbbe1.1	0.217074	0.782569	0.565495	Eukaryota	Dr_Blood	Xt_Blood
Dr_si:dkeyp-87a6.1;Xt_Xetrov90026166m	Dr_si:dkeyp-87a6.1;Xt_dnah1	0	0.564583	0.564583	Eukaryota
Xt_dnah1;Dr_dnah1	Xt_dnah1;Dr_si:dkeyp-87a6.1	0	0.564583	0.564583	Eukaryota
Xt_dnah1;Dr_LOC103911854	Xt_dnah1;Dr_si:dkeyp-87a6.1	0	0.564583	0.564583	Eukaryota
Xt_dnah1;Dr_LOC103911853	Xt_dnah1;Dr_si:dkeyp-87a6.1	0	0.564583	0.564583	Eukaryota
Dr_si:ch211-5k11.2;Xt_hba-l4	Dr_si:ch211-5k11.2;Xt_LOC100037901	0.0939991	0.658469	0.56447	Eukaryota	Dr_Blood	Xt_Blood
Dr_hbae3;Xt_hba2	Dr_hbae3;Xt_hbd	0.213042	0.777392	0.56435	Eukaryota	Dr_Blood	Xt_Blood
Xt_hba-l2;Dr_si:ch211-5k11.6	Xt_hba-l2;Dr_zgc:163057	0	0.563567	0.563567	Eukaryota	Dr_Blood	Xt_Blood
Xt_col5a1-like;Dr_col5a1	Xt_col5a1-like;Dr_col9a3	0.224044	0.784772	0.560728	Eukaryota	Dr_Intermediate mesoderm;Dr_Notochord;Dr_Notoplate	Xt_Endothelial;Xt_Notochord;Xt_Notoplate
Xt_LOC733709;Dr_her5	Xt_LOC733709;Dr_hes6	0	0.560528	0.560528	Eukaryota	Dr_Presomitic mesoderm;Dr_Tailbud	Xt_Presomitic mesoderm;Xt_Tailbud
Xt_t;Dr_t	Xt_t;Dr_tbx16	0	0.559862	0.559862	Eukaryota	Dr_Dorsal organizer;Dr_Involuting marginal zone;Dr_Notochord;Dr_Presomitic mesoderm	Xt_Involuting marginal zone;Xt_Notochord;Xt_Presomitic mesoderm;Xt_Spemann organizer;Xt_Tailbud
Xt_dpysl4;Dr_dpysl4	Xt_dpysl4;Dr_dpysl2b	0	0.559767	0.559767	Eukaryota	Dr_Forebrain/midbrain;Dr_Hindbrain;Dr_Neuron;Dr_Rohon-beard neuron;Dr_Tailbud	Xt_Eye primordium;Xt_Forebrain/midbrain;Xt_Hindbrain;Xt_Neuron;Xt_Rohon-beard neuron
Xt_hnrnpa2b1;Dr_hnrnpa3	Xt_hnrnpa2b1;Dr_hnrnpa0a	0	0.55856	0.55856	Eukaryota	Dr_Dorsal organizer;Dr_Endoderm;Dr_Forebrain/midbrain;Dr_Hindbrain;Dr_Intermediate mesoderm;Dr_Involuting marginal zone;Dr_Neuroectoderm;Dr_Neuron;Dr_Non-neural ectoderm;Dr_Notochord;Dr_Presomitic mesoderm;Dr_Rohon-beard neuron;Dr_Tailbud	Xt_Endoderm;Xt_Eye primordium;Xt_Forebrain/midbrain;Xt_Hindbrain;Xt_Involuting marginal zone;Xt_Neuroectoderm;Xt_Neuron;Xt_Non-neural ectoderm;Xt_Rohon-beard neuron;Xt_Spemann organizer;Xt_Tailbud
Xt_hnrnpa2b1;Dr_hnrnpa1b	Xt_hnrnpa2b1;Dr_hnrnpa0a	0	0.55856	0.55856	Eukaryota	Dr_Dorsal organizer;Dr_Endoderm;Dr_Forebrain/midbrain;Dr_Hindbrain;Dr_Intermediate mesoderm;Dr_Involuting marginal zone;Dr_Neuroectoderm;Dr_Neuron;Dr_Non-neural ectoderm;Dr_Notochord;Dr_Presomitic mesoderm;Dr_Rohon-beard neuron;Dr_Tailbud	Xt_Endoderm;Xt_Eye primordium;Xt_Forebrain/midbrain;Xt_Hindbrain;Xt_Involuting marginal zone;Xt_Neuroectoderm;Xt_Neuron;Xt_Non-neural ectoderm;Xt_Rohon-beard neuron;Xt_Spemann organizer;Xt_Tailbud
Xt_hba1;Dr_si:xx-by187g17.1	Xt_hba1;Dr_hbbe1.1	0.0781391	0.633576	0.555437	Eukaryota	Dr_Blood	Xt_Blood
Xt_col6a1;Dr_col6a1	Xt_col6a1;Dr_col12a1	0	0.553795	0.553795	Eukaryota	Dr_Epidermal progenitor;Dr_Placodal area	Xt_Epidermal progenitor
Xt_hba-l2;Dr_hbaa1	Xt_hba-l2;Dr_hbbe3	0.145475	0.699084	0.553608	Eukaryota	Dr_Blood	Xt_Blood
Xt_morn5;Dr_morn5	Xt_morn5;Dr_im:6909388	0.104862	0.657258	0.552396	Eukaryota
Xt_col5a1-like;Dr_col5a1	Xt_col5a1-like;Dr_col9a1b	0.224044	0.775621	0.551577	Eukaryota	Dr_Notochord;Dr_Notoplate	Xt_Notochord;Xt_Notoplate
Xt_hes7.2;Dr_her5	Xt_hes7.2;Dr_her1	0	0.550561	0.550561	Eukaryota	Dr_Involuting marginal zone;Dr_Presomitic mesoderm	Xt_Involuting marginal zone;Xt_Presomitic mesoderm;Xt_Skeletal muscle;Xt_Tailbud
Xt_hba1;Dr_si:xx-by187g17.1	Xt_hba1;Dr_si:ch211-5k11.12	0.0781391	0.628301	0.550161	Eukaryota	Dr_Blood	Xt_Blood
Dr_capn8;Xt_LOC100497284-like	Dr_capn8;Xt_capn13	0	0.549678	0.549678	Eukaryota	Dr_Epidermal progenitor;Dr_Hatching gland;Dr_Ionocyte;Dr_Placodal area;Dr_Rare epidermal subtypes;Dr_Secretory epidermal	Xt_Cement gland primordium;Xt_Epidermal progenitor;Xt_Goblet cell;Xt_Hatching gland;Xt_Ionocyte;Xt_Placodal area;Xt_Small secretory cells
Dr_capn8;Xt_capn8	Dr_capn8;Xt_capn13	0	0.549678	0.549678	Eukaryota	Dr_Epidermal progenitor;Dr_Hatching gland;Dr_Ionocyte;Dr_Placodal area;Dr_Rare epidermal subtypes;Dr_Secretory epidermal	Xt_Cement gland primordium;Xt_Epidermal progenitor;Xt_Goblet cell;Xt_Hatching gland;Xt_Ionocyte;Xt_Placodal area;Xt_Small secretory cells
Dr_capn8;Xt_LOC101730581	Dr_capn8;Xt_capn13	0	0.549678	0.549678	Eukaryota	Dr_Epidermal progenitor;Dr_Hatching gland;Dr_Ionocyte;Dr_Placodal area;Dr_Rare epidermal subtypes;Dr_Secretory epidermal	Xt_Cement gland primordium;Xt_Epidermal progenitor;Xt_Goblet cell;Xt_Hatching gland;Xt_Ionocyte;Xt_Placodal area;Xt_Small secretory cells
Dr_capn8;Xt_LOC101731595	Dr_capn8;Xt_capn13	0	0.549678	0.549678	Eukaryota	Dr_Epidermal progenitor;Dr_Hatching gland;Dr_Ionocyte;Dr_Placodal area;Dr_Rare epidermal subtypes;Dr_Secretory epidermal	Xt_Cement gland primordium;Xt_Epidermal progenitor;Xt_Goblet cell;Xt_Hatching gland;Xt_Ionocyte;Xt_Placodal area;Xt_Small secretory cells
Dr_capn8;Xt_capn2	Dr_capn8;Xt_capn13	0	0.549678	0.549678	Eukaryota	Dr_Epidermal progenitor;Dr_Hatching gland;Dr_Ionocyte;Dr_Placodal area;Dr_Rare epidermal subtypes;Dr_Secretory epidermal	Xt_Cement gland primordium;Xt_Epidermal progenitor;Xt_Goblet cell;Xt_Hatching gland;Xt_Ionocyte;Xt_Placodal area;Xt_Small secretory cells
Dr_capn8;Xt_Xetrov90013012m	Dr_capn8;Xt_capn13	0	0.549678	0.549678	Eukaryota	Dr_Epidermal progenitor;Dr_Hatching gland;Dr_Ionocyte;Dr_Placodal area;Dr_Rare epidermal subtypes;Dr_Secretory epidermal	Xt_Cement gland primordium;Xt_Epidermal progenitor;Xt_Goblet cell;Xt_Hatching gland;Xt_Ionocyte;Xt_Placodal area;Xt_Small secretory cells
Dr_si:ch211-5k11.2;Xt_hba-l3	Dr_si:ch211-5k11.2;Xt_LOC100216007	0.112317	0.661375	0.549058	Eukaryota	Dr_Blood	Xt_Blood
Dr_LOC103908654;Xt_LOC100493966	Dr_LOC103908654;Xt_ctcf	0	0.548299	0.548299	Eukaryota	Dr_Blastula;Dr_Involuting marginal zone;Dr_Neuroectoderm;Dr_Non-neural ectoderm	Xt_Blastula;Xt_Involuting marginal zone;Xt_Neuroectoderm;Xt_Non-neural ectoderm
Dr_LOC103908654;Xt_znf250	Dr_LOC103908654;Xt_ctcf	0	0.548299	0.548299	Eukaryota	Dr_Blastula;Dr_Involuting marginal zone;Dr_Neuroectoderm;Dr_Non-neural ectoderm	Xt_Blastula;Xt_Involuting marginal zone;Xt_Neuroectoderm;Xt_Non-neural ectoderm
Dr_LOC103908654;Xt_Xetrov90015421m	Dr_LOC103908654;Xt_ctcf	0	0.548299	0.548299	Eukaryota	Dr_Blastula;Dr_Involuting marginal zone;Dr_Neuroectoderm;Dr_Non-neural ectoderm	Xt_Blastula;Xt_Involuting marginal zone;Xt_Neuroectoderm;Xt_Non-neural ectoderm
Dr_LOC103908654;Xt_LOC100496561	Dr_LOC103908654;Xt_ctcf	0	0.548299	0.548299	Eukaryota	Dr_Blastula;Dr_Involuting marginal zone;Dr_Neuroectoderm;Dr_Non-neural ectoderm	Xt_Blastula;Xt_Involuting marginal zone;Xt_Neuroectoderm;Xt_Non-neural ectoderm
Dr_LOC103908654;Xt_Xetrov90001667m	Dr_LOC103908654;Xt_ctcf	0	0.548299	0.548299	Eukaryota	Dr_Blastula;Dr_Involuting marginal zone;Dr_Neuroectoderm;Dr_Non-neural ectoderm	Xt_Blastula;Xt_Involuting marginal zone;Xt_Neuroectoderm;Xt_Non-neural ectoderm
Dr_LOC103908654;Xt_LOC101735121-like	Dr_LOC103908654;Xt_ctcf	0	0.548299	0.548299	Eukaryota	Dr_Blastula;Dr_Involuting marginal zone;Dr_Neuroectoderm;Dr_Non-neural ectoderm	Xt_Blastula;Xt_Involuting marginal zone;Xt_Neuroectoderm;Xt_Non-neural ectoderm
Dr_LOC103908654;Xt_znf383	Dr_LOC103908654;Xt_ctcf	0	0.548299	0.548299	Eukaryota	Dr_Blastula;Dr_Involuting marginal zone;Dr_Neuroectoderm;Dr_Non-neural ectoderm	Xt_Blastula;Xt_Involuting marginal zone;Xt_Neuroectoderm;Xt_Non-neural ectoderm
Dr_LOC103908654;Xt_Xetrov90008367m	Dr_LOC103908654;Xt_ctcf	0	0.548299	0.548299	Eukaryota	Dr_Blastula;Dr_Involuting marginal zone;Dr_Neuroectoderm;Dr_Non-neural ectoderm	Xt_Blastula;Xt_Involuting marginal zone;Xt_Neuroectoderm;Xt_Non-neural ectoderm
Dr_LOC103908654;Xt_znf329	Dr_LOC103908654;Xt_ctcf	0	0.548299	0.548299	Eukaryota	Dr_Blastula;Dr_Involuting marginal zone;Dr_Neuroectoderm;Dr_Non-neural ectoderm	Xt_Blastula;Xt_Involuting marginal zone;Xt_Neuroectoderm;Xt_Non-neural ectoderm
Dr_LOC103908654;Xt_LOC101734394	Dr_LOC103908654;Xt_ctcf	0	0.548299	0.548299	Eukaryota	Dr_Blastula;Dr_Involuting marginal zone;Dr_Neuroectoderm;Dr_Non-neural ectoderm	Xt_Blastula;Xt_Involuting marginal zone;Xt_Neuroectoderm;Xt_Non-neural ectoderm
Xt_tbpl1;Dr_tbpl1	Xt_tbpl1;Dr_tbp	0.0465789	0.594644	0.548065	Eukaryota	Dr_Blastula	Xt_Blastula
Dr_LOC100538070;Xt_LOC101731491	Dr_LOC100538070;Xt_MGC107908	0	0.547743	0.547743	Eukaryota
Dr_LOC100538070;Xt_LOC100488644	Dr_LOC100538070;Xt_MGC107908	0	0.547743	0.547743	Eukaryota
Dr_LOC100538070;Xt_LOC100488329	Dr_LOC100538070;Xt_MGC107908	0	0.547743	0.547743	Eukaryota
Xt_foxa4;Dr_foxa1	Xt_foxa4;Dr_foxa3	0	0.547162	0.547162	Eukaryota	Dr_Dorsal organizer;Dr_Endoderm;Dr_Involuting marginal zone;Dr_Notochord	Xt_Endoderm;Xt_Involuting marginal zone;Xt_Notochord;Xt_Spemann organizer
Dr_hbae3;Xt_hba-l4	Dr_hbae3;Xt_LOC100216007	0.0893917	0.635942	0.54655	Eukaryota	Dr_Blood	Xt_Blood
Dr_LOC100334599;Xt_hba-l3	Dr_LOC100334599;Xt_LOC100216007	0.115467	0.661779	0.546312	Eukaryota	Dr_Blood	Xt_Blood
Dr_si:ch211-5k11.2;Xt_hba-l3	Dr_si:ch211-5k11.2;Xt_LOC100037901	0.112317	0.658469	0.546153	Eukaryota	Dr_Blood	Xt_Blood
Dr_hbae3;Xt_hba-l4	Dr_hbae3;Xt_LOC100037901	0.0893917	0.635339	0.545947	Eukaryota	Dr_Blood	Xt_Blood
Dr_si:dkey-261e22.1;Xt_nuak1	Dr_si:dkey-261e22.1;Xt_LOC100485259	0	0.54579	0.54579	Eukaryota	Dr_Endothelial;Dr_Epidermal progenitor;Dr_Intermediate mesoderm;Dr_Placodal area	Xt_Endothelial;Xt_Epidermal progenitor;Xt_Placodal area
Xt_LOC100485259;Dr_LOC101885029	Xt_LOC100485259;Dr_si:dkey-261e22.1	0	0.54579	0.54579	Eukaryota	Dr_Endothelial;Dr_Epidermal progenitor;Dr_Intermediate mesoderm;Dr_Placodal area	Xt_Endothelial;Xt_Epidermal progenitor;Xt_Placodal area
Xt_tnni2;Dr_tnni2a.1	Xt_tnni2;Dr_tnni2a.4	0	0.54542	0.54542	Eukaryota
Dr_LOC100538028;Xt_LOC101731491	Dr_LOC100538028;Xt_fgl2	0	0.544936	0.544936	Eukaryota
Xt_fgl2;Dr_fgl2a	Xt_fgl2;Dr_LOC100538028	0	0.544936	0.544936	Eukaryota
Dr_LOC100538028;Xt_LOC100488329	Dr_LOC100538028;Xt_fgl2	0	0.544936	0.544936	Eukaryota
Xt_fgl2;Dr_si:ch211-236c15.2	Xt_fgl2;Dr_LOC100538028	0	0.544936	0.544936	Eukaryota
Dr_LOC100538028;Xt_LOC100488644	Dr_LOC100538028;Xt_fgl2	0	0.544936	0.544936	Eukaryota
Dr_znf1137;Xt_znf329	Dr_znf1137;Xt_znf281	0	0.544638	0.544638	Eukaryota	Dr_Blastula;Dr_Involuting marginal zone;Dr_Neuroectoderm;Dr_Non-neural ectoderm	Xt_Blastula;Xt_Involuting marginal zone;Xt_Neuroectoderm;Xt_Non-neural ectoderm
Dr_znf1137;Xt_LOC100493966	Dr_znf1137;Xt_znf281	0	0.544638	0.544638	Eukaryota	Dr_Blastula;Dr_Involuting marginal zone;Dr_Neuroectoderm;Dr_Non-neural ectoderm	Xt_Blastula;Xt_Involuting marginal zone;Xt_Neuroectoderm;Xt_Non-neural ectoderm
Xt_znf281;Dr_LOC100005963	Xt_znf281;Dr_znf1137	0	0.544638	0.544638	Eukaryota	Dr_Blastula;Dr_Involuting marginal zone;Dr_Neuroectoderm;Dr_Non-neural ectoderm	Xt_Blastula;Xt_Involuting marginal zone;Xt_Neuroectoderm;Xt_Non-neural ectoderm
Dr_znf1137;Xt_znf250	Dr_znf1137;Xt_znf281	0	0.544638	0.544638	Eukaryota	Dr_Blastula;Dr_Involuting marginal zone;Dr_Neuroectoderm;Dr_Non-neural ectoderm	Xt_Blastula;Xt_Involuting marginal zone;Xt_Neuroectoderm;Xt_Non-neural ectoderm
Dr_LOC100334599;Xt_hba-l3	Dr_LOC100334599;Xt_LOC100037901	0.115467	0.659554	0.544087	Eukaryota	Dr_Blood	Xt_Blood
Dr_hoxc9a;Xt_hoxc9	Dr_hoxc9a;Xt_hoxc10	0.145358	0.688025	0.542666	Eukaryota	Dr_Presomitic mesoderm;Dr_Tailbud	Xt_Presomitic mesoderm;Xt_Skeletal muscle;Xt_Tailbud
Dr_LOC100006216;Xt_Xetrov90015421m	Dr_LOC100006216;Xt_sp5l	0.148956	0.691103	0.542147	Eukaryota	Dr_Dorsal organizer;Dr_Endoderm;Dr_Intermediate mesoderm;Dr_Involuting marginal zone;Dr_Notochord;Dr_Presomitic mesoderm	Xt_Endoderm;Xt_Involuting marginal zone;Xt_Notochord;Xt_Presomitic mesoderm;Xt_Spemann organizer;Xt_Tailbud
Dr_hoxd13a;Xt_hoxd13	Dr_hoxd13a;Xt_hoxc10	0	0.541642	0.541642	Eukaryota	Dr_Presomitic mesoderm	Xt_Presomitic mesoderm;Xt_Skeletal muscle;Xt_Tailbud
Dr_capn2l;Xt_LOC101733523	Dr_capn2l;Xt_capn13	0	0.541462	0.541462	Eukaryota	Dr_Ionocyte;Dr_Rare epidermal subtypes;Dr_Secretory epidermal	Xt_Cement gland primordium;Xt_Goblet cell;Xt_Hatching gland;Xt_Ionocyte;Xt_Small secretory cells
Dr_capn2l;Xt_capn2.2	Dr_capn2l;Xt_capn13	0	0.541462	0.541462	Eukaryota	Dr_Ionocyte;Dr_Rare epidermal subtypes;Dr_Secretory epidermal	Xt_Cement gland primordium;Xt_Goblet cell;Xt_Hatching gland;Xt_Ionocyte;Xt_Small secretory cells
Dr_hbae1;Xt_hba-l3	Dr_hbae1;Xt_LOC100037901	0.072172	0.612721	0.540549	Eukaryota	Dr_Blood	Xt_Blood
Dr_hoxa10b;Xt_hoxa10	Dr_hoxa10b;Xt_hoxc10	0.183478	0.723527	0.540049	Eukaryota	Dr_Presomitic mesoderm;Dr_Tailbud	Xt_Presomitic mesoderm;Xt_Skeletal muscle;Xt_Tailbud
Xt_hoxa11;Dr_hoxa11b	Xt_hoxa11;Dr_hoxb10a	0	0.539691	0.539691	Eukaryota	Dr_Presomitic mesoderm	Xt_Presomitic mesoderm
Xt_myh4;Dr_wu:fd14a01	Xt_myh4;Dr_ns:zf-e68	0	0.539421	0.539421	Eukaryota	Dr_Skeletal muscle	Xt_Skeletal muscle
Xt_myh4;Dr_LOC100537594	Xt_myh4;Dr_ns:zf-e68	0	0.539421	0.539421	Eukaryota	Dr_Skeletal muscle	Xt_Skeletal muscle
Xt_myh4;Dr_zgc:66156	Xt_myh4;Dr_ns:zf-e68	0	0.539421	0.539421	Eukaryota	Dr_Skeletal muscle	Xt_Skeletal muscle
Xt_myh4;Dr_myhb	Xt_myh4;Dr_ns:zf-e68	0	0.539421	0.539421	Eukaryota	Dr_Skeletal muscle	Xt_Skeletal muscle
Xt_LOC100486063;Dr_LOC100535278	Xt_LOC100486063;Dr_col12a1	0	0.539364	0.539364	Eukaryota	Dr_Epidermal progenitor;Dr_Placodal area	Xt_Epidermal progenitor;Xt_Placodal area
Xt_LOC100486063;Dr_col6a6	Xt_LOC100486063;Dr_col12a1	0	0.539364	0.539364	Eukaryota	Dr_Epidermal progenitor;Dr_Placodal area	Xt_Epidermal progenitor;Xt_Placodal area
Xt_t2;Dr_t	Xt_t2;Dr_LOC100334188	0	0.539155	0.539155	Eukaryota	Dr_Notochord	Xt_Notochord
Dr_znf1137;Xt_LOC100496561	Dr_znf1137;Xt_znf281	0.00565628	0.544638	0.538981	Eukaryota	Dr_Blastula;Dr_Involuting marginal zone;Dr_Neuroectoderm;Dr_Non-neural ectoderm	Xt_Blastula;Xt_Involuting marginal zone;Xt_Neuroectoderm;Xt_Non-neural ectoderm
Xt_fgl2;Dr_fgl2a	Xt_fgl2;Dr_si:ch1073-110a20.1	0	0.538663	0.538663	Eukaryota
Xt_fgl2;Dr_si:ch211-236c15.2	Xt_fgl2;Dr_si:ch1073-110a20.1	0	0.538663	0.538663	Eukaryota
Xt_hba-l2;Dr_hbaa1	Xt_hba-l2;Dr_MGC173646	0.145475	0.684031	0.538555	Eukaryota	Dr_Blood	Xt_Blood
Xt_sall1;Dr_LOC100149526	Xt_sall1;Dr_sall4	0	0.538022	0.538022	Eukaryota	Dr_Dorsal organizer;Dr_Endoderm;Dr_Involuting marginal zone;Dr_Neuroectoderm;Dr_Non-neural ectoderm;Dr_Notochord;Dr_Presomitic mesoderm;Dr_Tailbud	Xt_Endoderm;Xt_Involuting marginal zone;Xt_Neuroectoderm;Xt_Non-neural ectoderm;Xt_Notochord;Xt_Presomitic mesoderm;Xt_Spemann organizer;Xt_Tailbud
Dr_cetn2;Xt_cetn1	Dr_cetn2;Xt_cetn3	0	0.536507	0.536507	Eukaryota
Dr_hbae1;Xt_hba2	Dr_hbae1;Xt_LOC100216007	0.125083	0.659718	0.534635	Eukaryota	Dr_Blood	Xt_Blood
Dr_zgc:174275;Xt_znf329	Dr_zgc:174275;Xt_znf281	0	0.533807	0.533807	Eukaryota	Dr_Blastula;Dr_Involuting marginal zone;Dr_Neuroectoderm;Dr_Non-neural ectoderm	Xt_Blastula;Xt_Involuting marginal zone;Xt_Neuroectoderm;Xt_Non-neural ectoderm
Xt_znf281;Dr_LOC100005963	Xt_znf281;Dr_zgc:174275	0	0.533807	0.533807	Eukaryota	Dr_Blastula;Dr_Involuting marginal zone;Dr_Neuroectoderm;Dr_Non-neural ectoderm	Xt_Blastula;Xt_Involuting marginal zone;Xt_Neuroectoderm;Xt_Non-neural ectoderm
Dr_zgc:174275;Xt_LOC100493966	Dr_zgc:174275;Xt_znf281	0	0.533807	0.533807	Eukaryota	Dr_Blastula;Dr_Involuting marginal zone;Dr_Neuroectoderm;Dr_Non-neural ectoderm	Xt_Blastula;Xt_Involuting marginal zone;Xt_Neuroectoderm;Xt_Non-neural ectoderm
Dr_znf1137;Xt_LOC101735121-like	Dr_znf1137;Xt_znf281	0.0108699	0.544638	0.533768	Eukaryota	Dr_Blastula;Dr_Involuting marginal zone;Dr_Neuroectoderm;Dr_Non-neural ectoderm	Xt_Blastula;Xt_Involuting marginal zone;Xt_Neuroectoderm;Xt_Non-neural ectoderm
Dr_mmp13a;Xt_mmp1	Dr_mmp13a;Xt_mmp13	0	0.533595	0.533595	Eukaryota
Dr_mmp13a;Xt_LOC100491214	Dr_mmp13a;Xt_mmp13	0	0.533595	0.533595	Eukaryota
Dr_mmp13a;Xt_LOC100494588	Dr_mmp13a;Xt_mmp13	0	0.533595	0.533595	Eukaryota
Dr_mmp13a;Xt_LOC100489735	Dr_mmp13a;Xt_mmp13	0	0.533595	0.533595	Eukaryota
Dr_mmp13a;Xt_LOC100491547	Dr_mmp13a;Xt_mmp13	0	0.533595	0.533595	Eukaryota
Dr_mmp13a;Xt_LOC100489571	Dr_mmp13a;Xt_mmp13	0	0.533595	0.533595	Eukaryota
Dr_zgc:174275;Xt_LOC101735121-like	Dr_zgc:174275;Xt_znf281	0.000658014	0.533807	0.533149	Eukaryota	Dr_Blastula;Dr_Involuting marginal zone;Dr_Neuroectoderm;Dr_Non-neural ectoderm	Xt_Blastula;Xt_Involuting marginal zone;Xt_Neuroectoderm;Xt_Non-neural ectoderm
Xt_tnni1.2;Dr_zgc:112242	Xt_tnni1.2;Dr_tnni2b.2	0	0.532905	0.532905	Eukaryota
Dr_zgc:113886;Xt_LOC100495499	Dr_zgc:113886;Xt_znf518b	0.0608232	0.593618	0.532794	Eukaryota	Dr_Blastula	Xt_Blastula
Dr_si:zfos-2330d3.1;Xt_LOC100488329	Dr_si:zfos-2330d3.1;Xt_MGC107908	0	0.531938	0.531938	Eukaryota
Dr_si:zfos-2330d3.1;Xt_LOC101731491	Dr_si:zfos-2330d3.1;Xt_MGC107908	0	0.531938	0.531938	Eukaryota
Dr_si:zfos-2330d3.1;Xt_LOC100488644	Dr_si:zfos-2330d3.1;Xt_MGC107908	0	0.531938	0.531938	Eukaryota
Dr_LOC103908654;Xt_Xetrov90029323m	Dr_LOC103908654;Xt_ctcf	0.016767	0.548299	0.531532	Eukaryota	Dr_Blastula;Dr_Involuting marginal zone;Dr_Neuroectoderm;Dr_Non-neural ectoderm	Xt_Blastula;Xt_Involuting marginal zone;Xt_Neuroectoderm;Xt_Non-neural ectoderm
Dr_LOC100334599;Xt_hba-l4	Dr_LOC100334599;Xt_LOC101735171	0.0934624	0.624512	0.531049	Eukaryota	Dr_Blood	Xt_Blood
Xt_hba3;Dr_si:xx-by187g17.1	Xt_hba3;Dr_hbbe3	0.423908	0.954636	0.530728	Eukaryota	Dr_Blood	Xt_Blood
Xt_anxa2;Dr_anxa2a	Xt_anxa2;Dr_anxa11b	0.157147	0.68745	0.530303	Eukaryota	Dr_Endoderm;Dr_Epidermal progenitor;Dr_Ionocyte;Dr_Lens;Dr_Otic placode;Dr_Placodal area;Dr_Rare epidermal subtypes;Dr_Secretory epidermal	Xt_Cement gland primordium;Xt_Epidermal progenitor;Xt_Goblet cell;Xt_Hatching gland;Xt_Ionocyte;Xt_Lens;Xt_Otic placode;Xt_Placodal area;Xt_Small secretory cells
Dr_LOC100334599;Xt_hba-l4	Dr_LOC100334599;Xt_LOC100145107	0.0934624	0.62356	0.530097	Eukaryota	Dr_Blood	Xt_Blood
Xt_dnah3;Dr_si:dkey-161j23.4	Xt_dnah3;Dr_dnah6	0	0.529866	0.529866	Eukaryota
Dr_hbae1;Xt_hba-l4	Dr_hbae1;Xt_LOC100037901	0.0831047	0.612721	0.529617	Eukaryota	Dr_Blood	Xt_Blood
Dr_si:ch211-5k11.2;Xt_hba-l4	Dr_si:ch211-5k11.2;Xt_LOC100145107	0.0939991	0.623609	0.52961	Eukaryota	Dr_Blood	Xt_Blood
Dr_si:ch211-5k11.2;Xt_hba-l4	Dr_si:ch211-5k11.2;Xt_LOC101735171	0.0939991	0.623607	0.529608	Eukaryota	Dr_Blood	Xt_Blood
Dr_znf1137;Xt_Xetrov90001667m	Dr_znf1137;Xt_znf281	0.0158436	0.544638	0.528794	Eukaryota	Dr_Blastula;Dr_Involuting marginal zone;Dr_Neuroectoderm;Dr_Non-neural ectoderm	Xt_Blastula;Xt_Involuting marginal zone;Xt_Neuroectoderm;Xt_Non-neural ectoderm
Dr_zgc:113886;Xt_LOC100495499	Dr_zgc:113886;Xt_bcl6	0.0608232	0.589105	0.528282	Eukaryota	Dr_Blastula	Xt_Blastula
Xt_hba-l2;Dr_hbaa1	Xt_hba-l2;Dr_hbbe1.1	0.145475	0.673547	0.528071	Eukaryota	Dr_Blood	Xt_Blood
Xt_fgl2;Dr_si:ch211-236c15.2	Xt_fgl2;Dr_LOC100538070	0	0.527726	0.527726	Eukaryota
Dr_LOC100538070;Xt_LOC100488329	Dr_LOC100538070;Xt_fgl2	0	0.527726	0.527726	Eukaryota
Xt_fgl2;Dr_fgl2a	Xt_fgl2;Dr_LOC100538070	0	0.527726	0.527726	Eukaryota
Dr_LOC100538070;Xt_LOC101731491	Dr_LOC100538070;Xt_fgl2	0	0.527726	0.527726	Eukaryota
Dr_LOC100538070;Xt_LOC100488644	Dr_LOC100538070;Xt_fgl2	0	0.527726	0.527726	Eukaryota
Xt_gsx2;Dr_gsx2	Xt_gsx2;Dr_gsx1	0.0398137	0.567512	0.527698	Eukaryota
Xt_hba-l5;Dr_hbaa1	Xt_hba-l5;Dr_zgc:163057	0.237681	0.765059	0.527378	Eukaryota	Dr_Blood	Xt_Blood
Dr_hbae3;Xt_hba-l3	Dr_hbae3;Xt_LOC100216007	0.112611	0.635942	0.52333	Eukaryota	Dr_Blood	Xt_Blood
Dr_ubtf;Xt_ubtf.2	Dr_ubtf;Xt_hmgb3	0.0347645	0.558048	0.523284	Eukaryota	Dr_Dorsal organizer;Dr_Involuting marginal zone;Dr_Neuroectoderm;Dr_Non-neural ectoderm;Dr_Presomitic mesoderm;Dr_Tailbud	Xt_Hindbrain;Xt_Involuting marginal zone;Xt_Neuroectoderm;Xt_Non-neural ectoderm;Xt_Spemann organizer;Xt_Tailbud
Dr_hbae3;Xt_hba-l3	Dr_hbae3;Xt_LOC100037901	0.112611	0.635339	0.522727	Eukaryota	Dr_Blood	Xt_Blood
Xt_nme7;Dr_nme7	Xt_nme7;Dr_LOC103911697	0.143495	0.665951	0.522456	Eukaryota
Dr_hoxa13b;Xt_hoxa13	Dr_hoxa13b;Xt_hoxc10	0	0.52245	0.52245	Eukaryota
Xt_dnah7;Dr_dnah7	Xt_dnah7;Dr_dnah6	0.0359341	0.55783	0.521896	Eukaryota
Dr_zgc:174275;Xt_LOC100496561	Dr_zgc:174275;Xt_znf281	0.0119995	0.533807	0.521807	Eukaryota	Dr_Blastula;Dr_Involuting marginal zone;Dr_Neuroectoderm;Dr_Non-neural ectoderm	Xt_Blastula;Xt_Involuting marginal zone;Xt_Neuroectoderm;Xt_Non-neural ectoderm
Xt_tctex1d2;Dr_tctex1d2	Xt_tctex1d2;Dr_tctex1d1	0.120394	0.642063	0.521669	Eukaryota
Dr_LOC103908654;Xt_LOC100496403-like	Dr_LOC103908654;Xt_ctcf	0.0275308	0.548299	0.520768	Eukaryota	Dr_Blastula;Dr_Involuting marginal zone;Dr_Neuroectoderm;Dr_Non-neural ectoderm	Xt_Blastula;Xt_Involuting marginal zone;Xt_Neuroectoderm;Xt_Non-neural ectoderm
Xt_tekt1;Dr_tekt1	Xt_tekt1;Dr_tekt4	0.266522	0.786656	0.520133	Eukaryota
Dr_zgc:174275;Xt_Xetrov90001667m	Dr_zgc:174275;Xt_znf281	0.0136898	0.533807	0.520117	Eukaryota	Dr_Blastula;Dr_Involuting marginal zone;Dr_Neuroectoderm;Dr_Non-neural ectoderm	Xt_Blastula;Xt_Involuting marginal zone;Xt_Neuroectoderm;Xt_Non-neural ectoderm
Xt_hba1;Dr_si:xx-by187g17.1	Xt_hba1;Dr_MGC173646	0.0781391	0.59729	0.519151	Eukaryota	Dr_Blood	Xt_Blood
Xt_hmgb2;Dr_hmgb2a	Xt_hmgb2;Dr_hmgb2b	0	0.518543	0.518543	Eukaryota	Dr_Eye primordium;Dr_Forebrain/midbrain;Dr_Hindbrain;Dr_Intermediate mesoderm;Dr_Neural crest;Dr_Optic;Dr_Presomitic mesoderm;Dr_Tailbud	Xt_Endothelial;Xt_Eye primordium;Xt_Forebrain/midbrain;Xt_Hindbrain;Xt_Intermediate mesoderm;Xt_Neural crest;Xt_Optic;Xt_Presomitic mesoderm;Xt_Pronephric mesenchyme;Xt_Tailbud
Xt_tnni1.2;Dr_tnni1al	Xt_tnni1.2;Dr_tnni2b.1	0.432484	0.950824	0.518341	Eukaryota	Dr_Presomitic mesoderm;Dr_Skeletal muscle	Xt_Skeletal muscle
Dr_znf1137;Xt_LOC101734394	Dr_znf1137;Xt_znf281	0.0267137	0.544638	0.517924	Eukaryota	Dr_Blastula;Dr_Involuting marginal zone;Dr_Neuroectoderm;Dr_Non-neural ectoderm	Xt_Blastula;Xt_Involuting marginal zone;Xt_Neuroectoderm;Xt_Non-neural ectoderm
Xt_myh8-like;Dr_myhb	Xt_myh8-like;Dr_ns:zf-e68	0	0.517639	0.517639	Eukaryota	Dr_Skeletal muscle	Xt_Skeletal muscle
Xt_myh8-like;Dr_wu:fd14a01	Xt_myh8-like;Dr_ns:zf-e68	0	0.517639	0.517639	Eukaryota	Dr_Skeletal muscle	Xt_Skeletal muscle
Xt_myh8-like;Dr_zgc:66156	Xt_myh8-like;Dr_ns:zf-e68	0	0.517639	0.517639	Eukaryota	Dr_Skeletal muscle	Xt_Skeletal muscle
Xt_myh8-like;Dr_LOC100537594	Xt_myh8-like;Dr_ns:zf-e68	0	0.517639	0.517639	Eukaryota	Dr_Skeletal muscle	Xt_Skeletal muscle
Xt_col5a1-like;Dr_col5a1	Xt_col5a1-like;Dr_LOC100333762	0.224044	0.738747	0.514703	Eukaryota	Dr_Notochord	Xt_Notochord
Dr_LOC103909095;Xt_LOC100496561	Dr_LOC103909095;Xt_ctcf	0	0.514363	0.514363	Eukaryota	Dr_Blastula;Dr_Dorsal organizer;Dr_Involuting marginal zone;Dr_Neuroectoderm;Dr_Non-neural ectoderm	Xt_Blastula;Xt_Involuting marginal zone;Xt_Neuroectoderm;Xt_Non-neural ectoderm;Xt_Spemann organizer
Dr_LOC103909095;Xt_Xetrov90015421m	Dr_LOC103909095;Xt_ctcf	0	0.514363	0.514363	Eukaryota	Dr_Blastula;Dr_Dorsal organizer;Dr_Involuting marginal zone;Dr_Neuroectoderm;Dr_Non-neural ectoderm	Xt_Blastula;Xt_Involuting marginal zone;Xt_Neuroectoderm;Xt_Non-neural ectoderm;Xt_Spemann organizer
Dr_LOC103909095;Xt_LOC100497179-like	Dr_LOC103909095;Xt_ctcf	0	0.514363	0.514363	Eukaryota	Dr_Blastula;Dr_Dorsal organizer;Dr_Involuting marginal zone;Dr_Neuroectoderm;Dr_Non-neural ectoderm	Xt_Blastula;Xt_Involuting marginal zone;Xt_Neuroectoderm;Xt_Non-neural ectoderm;Xt_Spemann organizer
Dr_LOC103909095;Xt_LOC100493966	Dr_LOC103909095;Xt_ctcf	0	0.514363	0.514363	Eukaryota	Dr_Blastula;Dr_Dorsal organizer;Dr_Involuting marginal zone;Dr_Neuroectoderm;Dr_Non-neural ectoderm	Xt_Blastula;Xt_Involuting marginal zone;Xt_Neuroectoderm;Xt_Non-neural ectoderm;Xt_Spemann organizer
Dr_LOC103909095;Xt_Xetrov90001667m	Dr_LOC103909095;Xt_ctcf	0	0.514363	0.514363	Eukaryota	Dr_Blastula;Dr_Dorsal organizer;Dr_Involuting marginal zone;Dr_Neuroectoderm;Dr_Non-neural ectoderm	Xt_Blastula;Xt_Involuting marginal zone;Xt_Neuroectoderm;Xt_Non-neural ectoderm;Xt_Spemann organizer
Dr_LOC103909095;Xt_Xetrov90029323m	Dr_LOC103909095;Xt_ctcf	0	0.514363	0.514363	Eukaryota	Dr_Blastula;Dr_Dorsal organizer;Dr_Involuting marginal zone;Dr_Neuroectoderm;Dr_Non-neural ectoderm	Xt_Blastula;Xt_Involuting marginal zone;Xt_Neuroectoderm;Xt_Non-neural ectoderm;Xt_Spemann organizer
Dr_LOC103909095;Xt_znf329	Dr_LOC103909095;Xt_ctcf	0	0.514363	0.514363	Eukaryota	Dr_Blastula;Dr_Dorsal organizer;Dr_Involuting marginal zone;Dr_Neuroectoderm;Dr_Non-neural ectoderm	Xt_Blastula;Xt_Involuting marginal zone;Xt_Neuroectoderm;Xt_Non-neural ectoderm;Xt_Spemann organizer
Dr_LOC103909095;Xt_znf250	Dr_LOC103909095;Xt_ctcf	0	0.514363	0.514363	Eukaryota	Dr_Blastula;Dr_Dorsal organizer;Dr_Involuting marginal zone;Dr_Neuroectoderm;Dr_Non-neural ectoderm	Xt_Blastula;Xt_Involuting marginal zone;Xt_Neuroectoderm;Xt_Non-neural ectoderm;Xt_Spemann organizer
Dr_LOC103909095;Xt_LOC100496403-like	Dr_LOC103909095;Xt_ctcf	0	0.514363	0.514363	Eukaryota	Dr_Blastula;Dr_Dorsal organizer;Dr_Involuting marginal zone;Dr_Neuroectoderm;Dr_Non-neural ectoderm	Xt_Blastula;Xt_Involuting marginal zone;Xt_Neuroectoderm;Xt_Non-neural ectoderm;Xt_Spemann organizer
Dr_LOC103909095;Xt_Xetrov90015419m	Dr_LOC103909095;Xt_ctcf	0	0.514363	0.514363	Eukaryota	Dr_Blastula;Dr_Dorsal organizer;Dr_Involuting marginal zone;Dr_Neuroectoderm;Dr_Non-neural ectoderm	Xt_Blastula;Xt_Involuting marginal zone;Xt_Neuroectoderm;Xt_Non-neural ectoderm;Xt_Spemann organizer
Dr_LOC103909095;Xt_LOC101734394	Dr_LOC103909095;Xt_ctcf	0	0.514363	0.514363	Eukaryota	Dr_Blastula;Dr_Dorsal organizer;Dr_Involuting marginal zone;Dr_Neuroectoderm;Dr_Non-neural ectoderm	Xt_Blastula;Xt_Involuting marginal zone;Xt_Neuroectoderm;Xt_Non-neural ectoderm;Xt_Spemann organizer
Dr_LOC103909095;Xt_LOC100495499	Dr_LOC103909095;Xt_ctcf	0	0.514363	0.514363	Eukaryota	Dr_Blastula;Dr_Dorsal organizer;Dr_Involuting marginal zone;Dr_Neuroectoderm;Dr_Non-neural ectoderm	Xt_Blastula;Xt_Involuting marginal zone;Xt_Neuroectoderm;Xt_Non-neural ectoderm;Xt_Spemann organizer
Dr_LOC103909095;Xt_znf383	Dr_LOC103909095;Xt_ctcf	0	0.514363	0.514363	Eukaryota	Dr_Blastula;Dr_Dorsal organizer;Dr_Involuting marginal zone;Dr_Neuroectoderm;Dr_Non-neural ectoderm	Xt_Blastula;Xt_Involuting marginal zone;Xt_Neuroectoderm;Xt_Non-neural ectoderm;Xt_Spemann organizer
Dr_LOC103909095;Xt_LOC101735121-like	Dr_LOC103909095;Xt_ctcf	0	0.514363	0.514363	Eukaryota	Dr_Blastula;Dr_Dorsal organizer;Dr_Involuting marginal zone;Dr_Neuroectoderm;Dr_Non-neural ectoderm	Xt_Blastula;Xt_Involuting marginal zone;Xt_Neuroectoderm;Xt_Non-neural ectoderm;Xt_Spemann organizer
Dr_LOC103909095;Xt_Xetrov90008367m	Dr_LOC103909095;Xt_ctcf	0	0.514363	0.514363	Eukaryota	Dr_Blastula;Dr_Dorsal organizer;Dr_Involuting marginal zone;Dr_Neuroectoderm;Dr_Non-neural ectoderm	Xt_Blastula;Xt_Involuting marginal zone;Xt_Neuroectoderm;Xt_Non-neural ectoderm;Xt_Spemann organizer
Xt_hbz;Dr_hbaa1	Xt_hbz;Dr_zgc:163057	0.217074	0.731305	0.514231	Eukaryota	Dr_Blood	Xt_Blood
Dr_hbae1;Xt_hba-l3	Dr_hbae1;Xt_LOC100145107	0.072172	0.585398	0.513226	Eukaryota	Dr_Blood	Xt_Blood
Xt_dnah1;Dr_LOC103911852	Xt_dnah1;Dr_dnah5	0.104767	0.617816	0.513049	Eukaryota
Xt_nme7;Dr_nme7	Xt_nme7;Dr_nme8	0.143495	0.656222	0.512727	Eukaryota
Dr_znf1137;Xt_LOC100496403-like	Dr_znf1137;Xt_znf281	0.0324707	0.544638	0.512167	Eukaryota	Dr_Blastula;Dr_Involuting marginal zone;Dr_Neuroectoderm;Dr_Non-neural ectoderm	Xt_Blastula;Xt_Involuting marginal zone;Xt_Neuroectoderm;Xt_Non-neural ectoderm
Xt_anxa2;Dr_anxa2a	Xt_anxa2;Dr_LOC103908630	0.157147	0.66881	0.511663	Eukaryota	Dr_Endoderm;Dr_Epidermal progenitor;Dr_Ionocyte;Dr_Lens;Dr_Otic placode;Dr_Placodal area;Dr_Rare epidermal subtypes;Dr_Secretory epidermal	Xt_Cement gland primordium;Xt_Epidermal progenitor;Xt_Goblet cell;Xt_Hatching gland;Xt_Ionocyte;Xt_Lens;Xt_Otic placode;Xt_Placodal area;Xt_Small secretory cells
Dr_si:ch211-5k11.2;Xt_hba-l3	Dr_si:ch211-5k11.2;Xt_LOC100145107	0.112317	0.623609	0.511292	Eukaryota	Dr_Blood	Xt_Blood
Dr_si:ch211-5k11.2;Xt_hba-l3	Dr_si:ch211-5k11.2;Xt_LOC101735171	0.112317	0.623607	0.51129	Eukaryota	Dr_Blood	Xt_Blood
Xt_myh2;Dr_zgc:66156	Xt_myh2;Dr_myhz1.2	0	0.511148	0.511148	Eukaryota
Xt_myh2;Dr_LOC100537594	Xt_myh2;Dr_myhz1.2	0	0.511148	0.511148	Eukaryota
Xt_myh2;Dr_myhb	Xt_myh2;Dr_myhz1.2	0	0.511148	0.511148	Eukaryota
Xt_myh2;Dr_wu:fd14a01	Xt_myh2;Dr_myhz1.2	0	0.511148	0.511148	Eukaryota
Dr_hbae3;Xt_hba-l4	Dr_hbae3;Xt_LOC101735171	0.0893917	0.600071	0.510679	Eukaryota	Dr_Blood	Xt_Blood
Xt_dnah1;Dr_LOC103911852	Xt_dnah1;Dr_dnah6	0.104767	0.615417	0.51065	Eukaryota
Dr_zgc:174275;Xt_LOC101734394	Dr_zgc:174275;Xt_znf281	0.0234848	0.533807	0.510322	Eukaryota	Dr_Blastula;Dr_Involuting marginal zone;Dr_Neuroectoderm;Dr_Non-neural ectoderm	Xt_Blastula;Xt_Involuting marginal zone;Xt_Neuroectoderm;Xt_Non-neural ectoderm
Dr_LOC570015;Xt_znf329	Dr_LOC570015;Xt_sp3	0	0.510005	0.510005	Eukaryota	Dr_Involuting marginal zone;Dr_Neuroectoderm;Dr_Non-neural ectoderm	Xt_Involuting marginal zone;Xt_Neuroectoderm;Xt_Non-neural ectoderm
Dr_LOC570015;Xt_Xetrov90015421m	Dr_LOC570015;Xt_sp3	0	0.510005	0.510005	Eukaryota	Dr_Involuting marginal zone;Dr_Neuroectoderm;Dr_Non-neural ectoderm	Xt_Involuting marginal zone;Xt_Neuroectoderm;Xt_Non-neural ectoderm
Dr_LOC570015;Xt_LOC100497179-like	Dr_LOC570015;Xt_sp3	0	0.510005	0.510005	Eukaryota	Dr_Involuting marginal zone;Dr_Neuroectoderm;Dr_Non-neural ectoderm	Xt_Involuting marginal zone;Xt_Neuroectoderm;Xt_Non-neural ectoderm
Dr_LOC570015;Xt_znf383	Dr_LOC570015;Xt_sp3	0	0.510005	0.510005	Eukaryota	Dr_Involuting marginal zone;Dr_Neuroectoderm;Dr_Non-neural ectoderm	Xt_Involuting marginal zone;Xt_Neuroectoderm;Xt_Non-neural ectoderm
Dr_LOC570015;Xt_Xetrov90015419m	Dr_LOC570015;Xt_sp3	0	0.510005	0.510005	Eukaryota	Dr_Involuting marginal zone;Dr_Neuroectoderm;Dr_Non-neural ectoderm	Xt_Involuting marginal zone;Xt_Neuroectoderm;Xt_Non-neural ectoderm
Dr_LOC570015;Xt_Xetrov90029323m	Dr_LOC570015;Xt_sp3	0	0.510005	0.510005	Eukaryota	Dr_Involuting marginal zone;Dr_Neuroectoderm;Dr_Non-neural ectoderm	Xt_Involuting marginal zone;Xt_Neuroectoderm;Xt_Non-neural ectoderm
Dr_LOC570015;Xt_LOC101735121-like	Dr_LOC570015;Xt_sp3	0	0.510005	0.510005	Eukaryota	Dr_Involuting marginal zone;Dr_Neuroectoderm;Dr_Non-neural ectoderm	Xt_Involuting marginal zone;Xt_Neuroectoderm;Xt_Non-neural ectoderm
Dr_LOC570015;Xt_LOC100496403-like	Dr_LOC570015;Xt_sp3	0	0.510005	0.510005	Eukaryota	Dr_Involuting marginal zone;Dr_Neuroectoderm;Dr_Non-neural ectoderm	Xt_Involuting marginal zone;Xt_Neuroectoderm;Xt_Non-neural ectoderm
Dr_LOC570015;Xt_LOC100495499	Dr_LOC570015;Xt_sp3	0	0.510005	0.510005	Eukaryota	Dr_Involuting marginal zone;Dr_Neuroectoderm;Dr_Non-neural ectoderm	Xt_Involuting marginal zone;Xt_Neuroectoderm;Xt_Non-neural ectoderm
Dr_LOC570015;Xt_LOC100496561	Dr_LOC570015;Xt_sp3	0	0.510005	0.510005	Eukaryota	Dr_Involuting marginal zone;Dr_Neuroectoderm;Dr_Non-neural ectoderm	Xt_Involuting marginal zone;Xt_Neuroectoderm;Xt_Non-neural ectoderm
Dr_LOC570015;Xt_Xetrov90001667m	Dr_LOC570015;Xt_sp3	0	0.510005	0.510005	Eukaryota	Dr_Involuting marginal zone;Dr_Neuroectoderm;Dr_Non-neural ectoderm	Xt_Involuting marginal zone;Xt_Neuroectoderm;Xt_Non-neural ectoderm
Dr_LOC570015;Xt_znf250	Dr_LOC570015;Xt_sp3	0	0.510005	0.510005	Eukaryota	Dr_Involuting marginal zone;Dr_Neuroectoderm;Dr_Non-neural ectoderm	Xt_Involuting marginal zone;Xt_Neuroectoderm;Xt_Non-neural ectoderm
Dr_LOC570015;Xt_Xetrov90008367m	Dr_LOC570015;Xt_sp3	0	0.510005	0.510005	Eukaryota	Dr_Involuting marginal zone;Dr_Neuroectoderm;Dr_Non-neural ectoderm	Xt_Involuting marginal zone;Xt_Neuroectoderm;Xt_Non-neural ectoderm
Dr_LOC570015;Xt_LOC100493966	Dr_LOC570015;Xt_sp3	0	0.510005	0.510005	Eukaryota	Dr_Involuting marginal zone;Dr_Neuroectoderm;Dr_Non-neural ectoderm	Xt_Involuting marginal zone;Xt_Neuroectoderm;Xt_Non-neural ectoderm
Xt_hba-l2;Dr_hbaa1	Xt_hba-l2;Dr_hbbe2	0.145475	0.655404	0.509929	Eukaryota	Dr_Blood	Xt_Blood
Dr_hbae3;Xt_hba-l4	Dr_hbae3;Xt_LOC100145107	0.0893917	0.599135	0.509743	Eukaryota	Dr_Blood	Xt_Blood
Dr_zgc:174275;Xt_LOC100496403-like	Dr_zgc:174275;Xt_znf281	0.0243658	0.533807	0.509441	Eukaryota	Dr_Blastula;Dr_Involuting marginal zone;Dr_Neuroectoderm;Dr_Non-neural ectoderm	Xt_Blastula;Xt_Involuting marginal zone;Xt_Neuroectoderm;Xt_Non-neural ectoderm
Dr_LOC100334599;Xt_hba-l3	Dr_LOC100334599;Xt_LOC101735171	0.115467	0.624512	0.509045	Eukaryota	Dr_Blood	Xt_Blood
Dr_LOC100334599;Xt_hba-l3	Dr_LOC100334599;Xt_LOC100145107	0.115467	0.62356	0.508093	Eukaryota	Dr_Blood	Xt_Blood
Dr_LOC570015;Xt_LOC101734394	Dr_LOC570015;Xt_sp3	0.00262063	0.510005	0.507385	Eukaryota	Dr_Involuting marginal zone;Dr_Neuroectoderm;Dr_Non-neural ectoderm	Xt_Involuting marginal zone;Xt_Neuroectoderm;Xt_Non-neural ectoderm
Xt_znf276;Dr_zgc:158366	Xt_znf276;Dr_znf653	0	0.505833	0.505833	Eukaryota
Dr_znf653;Xt_Xetrov90009750m	Dr_znf653;Xt_znf276	0	0.505833	0.505833	Eukaryota
Dr_si:zfos-2330d3.1;Xt_LOC100488329	Dr_si:zfos-2330d3.1;Xt_fgl2	0	0.50508	0.50508	Eukaryota
Xt_fgl2;Dr_si:ch211-236c15.2	Xt_fgl2;Dr_si:zfos-2330d3.1	0	0.50508	0.50508	Eukaryota
Dr_si:zfos-2330d3.1;Xt_LOC100488644	Dr_si:zfos-2330d3.1;Xt_fgl2	0	0.50508	0.50508	Eukaryota
Dr_si:zfos-2330d3.1;Xt_LOC101731491	Dr_si:zfos-2330d3.1;Xt_fgl2	0	0.50508	0.50508	Eukaryota
Xt_fgl2;Dr_fgl2a	Xt_fgl2;Dr_si:zfos-2330d3.1	0	0.50508	0.50508	Eukaryota
Xt_hba4;Dr_si:ch211-5k11.6	Xt_hba4;Dr_hbbe3	0	0.504607	0.504607	Eukaryota
Dr_zgc:174624;Xt_LOC101735121-like	Dr_zgc:174624;Xt_znf281	0	0.504249	0.504249	Eukaryota	Dr_Blastula;Dr_Involuting marginal zone;Dr_Neuroectoderm;Dr_Non-neural ectoderm	Xt_Blastula;Xt_Involuting marginal zone;Xt_Neuroectoderm;Xt_Non-neural ectoderm
Dr_zgc:174624;Xt_znf329	Dr_zgc:174624;Xt_znf281	0	0.504249	0.504249	Eukaryota	Dr_Blastula;Dr_Involuting marginal zone;Dr_Neuroectoderm;Dr_Non-neural ectoderm	Xt_Blastula;Xt_Involuting marginal zone;Xt_Neuroectoderm;Xt_Non-neural ectoderm
Dr_zgc:174624;Xt_LOC100493966	Dr_zgc:174624;Xt_znf281	0	0.504249	0.504249	Eukaryota	Dr_Blastula;Dr_Involuting marginal zone;Dr_Neuroectoderm;Dr_Non-neural ectoderm	Xt_Blastula;Xt_Involuting marginal zone;Xt_Neuroectoderm;Xt_Non-neural ectoderm
Xt_znf281;Dr_LOC100005963	Xt_znf281;Dr_zgc:174624	0	0.504249	0.504249	Eukaryota	Dr_Blastula;Dr_Involuting marginal zone;Dr_Neuroectoderm;Dr_Non-neural ectoderm	Xt_Blastula;Xt_Involuting marginal zone;Xt_Neuroectoderm;Xt_Non-neural ectoderm
Dr_si:zfos-2330d3.3;Xt_LOC100488329	Dr_si:zfos-2330d3.3;Xt_fgl2	0	0.504044	0.504044	Eukaryota
Dr_si:zfos-2330d3.3;Xt_LOC101731491	Dr_si:zfos-2330d3.3;Xt_fgl2	0	0.504044	0.504044	Eukaryota
Xt_fgl2;Dr_fgl2a	Xt_fgl2;Dr_si:zfos-2330d3.3	0	0.504044	0.504044	Eukaryota
Xt_fgl2;Dr_si:ch211-236c15.2	Xt_fgl2;Dr_si:zfos-2330d3.3	0	0.504044	0.504044	Eukaryota
Dr_si:zfos-2330d3.3;Xt_LOC100488644	Dr_si:zfos-2330d3.3;Xt_fgl2	0	0.504044	0.504044	Eukaryota
Dr_fkbp7;Xt_fkbp7	Dr_fkbp7;Xt_fkbp10	0.0914633	0.594776	0.503313	Eukaryota	Dr_Epidermal progenitor;Dr_Intermediate mesoderm;Dr_Notochord;Dr_Placodal area;Dr_Presomitic mesoderm	Xt_Endothelial;Xt_Epidermal progenitor;Xt_Intermediate mesoderm;Xt_Notochord;Xt_Presomitic mesoderm;Xt_Skeletal muscle
Dr_si:ch211-5k11.2;Xt_hba2	Dr_si:ch211-5k11.2;Xt_hbe1	0.213684	0.716318	0.502634	Eukaryota	Dr_Blood	Xt_Blood
Dr_hbae1;Xt_hba-l4	Dr_hbae1;Xt_LOC100145107	0.0831047	0.585398	0.502293	Eukaryota	Dr_Blood	Xt_Blood
Xt_ak7;Dr_ak7b	Xt_ak7;Dr_ak8	0.167806	0.669542	0.501735	Eukaryota
Dr_gdf3;Xt_gdf3	Dr_gdf3;Xt_bmp7.2	0.106503	0.607541	0.501038	Eukaryota	Dr_Blastula;Dr_Involuting marginal zone;Dr_Neuroectoderm;Dr_Non-neural ectoderm	Xt_Blastula;Xt_Involuting marginal zone;Xt_Neuroectoderm;Xt_Non-neural ectoderm
Xt_meox2;Dr_meox2	Xt_meox2;Dr_meox1	0	0.500282	0.500282	Eukaryota	Dr_Presomitic mesoderm	Xt_Presomitic mesoderm
Xt_hnrnpa0;Dr_hnrnpa0l	Xt_hnrnpa0;Dr_hnrnpa1a	0	0.499881	0.499881	Eukaryota	Dr_Dorsal organizer;Dr_Involuting marginal zone;Dr_Neuroectoderm;Dr_Non-neural ectoderm;Dr_Tailbud	Xt_Hindbrain;Xt_Involuting marginal zone;Xt_Neuroectoderm;Xt_Non-neural ectoderm;Xt_Spemann organizer;Xt_Tailbud
Xt_hnrnpa0;Dr_hnrnpa0b	Xt_hnrnpa0;Dr_hnrnpa1a	0	0.499881	0.499881	Eukaryota	Dr_Dorsal organizer;Dr_Involuting marginal zone;Dr_Neuroectoderm;Dr_Non-neural ectoderm;Dr_Tailbud	Xt_Hindbrain;Xt_Involuting marginal zone;Xt_Neuroectoderm;Xt_Non-neural ectoderm;Xt_Spemann organizer;Xt_Tailbud
Dr_hnrnpa1a;Xt_hnrnpa3	Dr_hnrnpa1a;Xt_hnrnpa0	0	0.499881	0.499881	Eukaryota	Dr_Dorsal organizer;Dr_Involuting marginal zone;Dr_Neuroectoderm;Dr_Non-neural ectoderm;Dr_Tailbud	Xt_Hindbrain;Xt_Involuting marginal zone;Xt_Neuroectoderm;Xt_Non-neural ectoderm;Xt_Spemann organizer;Xt_Tailbud
Dr_hbae1;Xt_hba-l3	Dr_hbae1;Xt_LOC101735171	0.072172	0.571591	0.49942	Eukaryota	Dr_Blood	Xt_Blood
Dr_zgc:113886;Xt_LOC100497179-like	Dr_zgc:113886;Xt_znf518b	0.095128	0.593618	0.498489	Eukaryota	Dr_Blastula	Xt_Blastula
Dr_zgc:174624;Xt_Xetrov90001667m	Dr_zgc:174624;Xt_znf281	0.00607913	0.504249	0.49817	Eukaryota	Dr_Blastula;Dr_Involuting marginal zone;Dr_Neuroectoderm;Dr_Non-neural ectoderm	Xt_Blastula;Xt_Involuting marginal zone;Xt_Neuroectoderm;Xt_Non-neural ectoderm
Dr_cbx1a;Xt_cbx1	Dr_cbx1a;Xt_cbx3	0.139992	0.63776	0.497767	Eukaryota	Dr_Dorsal organizer;Dr_Endoderm;Dr_Involuting marginal zone;Dr_Neuroectoderm;Dr_Non-neural ectoderm;Dr_Tailbud	Xt_Endoderm;Xt_Hindbrain;Xt_Involuting marginal zone;Xt_Neuroectoderm;Xt_Non-neural ectoderm;Xt_Spemann organizer;Xt_Tailbud
Dr_LOC100334599;Xt_hba2	Dr_LOC100334599;Xt_hbe1	0.219352	0.713889	0.494536	Eukaryota	Dr_Blood	Xt_Blood
Dr_hoxb9a;Xt_hoxb9	Dr_hoxb9a;Xt_hoxd10	0.0703406	0.564644	0.494304	Eukaryota	Dr_Presomitic mesoderm;Dr_Tailbud	Xt_Presomitic mesoderm;Xt_Tailbud
Dr_zgc:113886;Xt_LOC100497179-like	Dr_zgc:113886;Xt_bcl6	0.095128	0.589105	0.493977	Eukaryota	Dr_Blastula	Xt_Blastula
Xt_rsph10b-like;Dr_rsph10b	Xt_rsph10b-like;Dr_im:6909388	0.142821	0.636739	0.493918	Eukaryota
Xt_hba4;Dr_si:ch211-5k11.6	Xt_hba4;Dr_MGC173646	0	0.493758	0.493758	Eukaryota
Dr_zgc:174624;Xt_LOC100496561	Dr_zgc:174624;Xt_znf281	0.0105979	0.504249	0.493651	Eukaryota	Dr_Blastula;Dr_Involuting marginal zone;Dr_Neuroectoderm;Dr_Non-neural ectoderm	Xt_Blastula;Xt_Involuting marginal zone;Xt_Neuroectoderm;Xt_Non-neural ectoderm
Xt_dnah1;Dr_dnah1	Xt_dnah1;Dr_dnah12	0	0.492831	0.492831	Eukaryota
Xt_dnah1;Dr_LOC103911854	Xt_dnah1;Dr_dnah12	0	0.492831	0.492831	Eukaryota
Xt_dnah1;Dr_LOC103911853	Xt_dnah1;Dr_dnah12	0	0.492831	0.492831	Eukaryota
Xt_hba1;Dr_si:xx-by187g17.1	Xt_hba1;Dr_hbbe2	0.0781391	0.570562	0.492423	Eukaryota	Dr_Blood	Xt_Blood
Xt_znf276;Dr_zgc:158366	Xt_znf276;Dr_LOC100329742	0	0.492286	0.492286	Eukaryota
Dr_LOC100329742;Xt_Xetrov90009750m	Dr_LOC100329742;Xt_znf276	0	0.492286	0.492286	Eukaryota
Xt_myf6;Dr_myf6	Xt_myf6;Dr_myog	0	0.489231	0.489231	Eukaryota	Dr_Skeletal muscle	Xt_Skeletal muscle
Dr_zgc:174624;Xt_LOC101734394	Dr_zgc:174624;Xt_znf281	0.015279	0.504249	0.48897	Eukaryota	Dr_Blastula;Dr_Involuting marginal zone;Dr_Neuroectoderm;Dr_Non-neural ectoderm	Xt_Blastula;Xt_Involuting marginal zone;Xt_Neuroectoderm;Xt_Non-neural ectoderm
Dr_hbae1;Xt_hba-l4	Dr_hbae1;Xt_LOC101735171	0.0831047	0.571591	0.488487	Eukaryota	Dr_Blood	Xt_Blood
Dr_LOC103910469;Xt_znf383	Dr_LOC103910469;Xt_bcl6	0	0.487935	0.487935	Eukaryota	Dr_Blastula	Xt_Blastula
Dr_LOC103910469;Xt_znf329	Dr_LOC103910469;Xt_bcl6	0	0.487935	0.487935	Eukaryota	Dr_Blastula	Xt_Blastula
Dr_LOC103910469;Xt_znf250	Dr_LOC103910469;Xt_bcl6	0	0.487935	0.487935	Eukaryota	Dr_Blastula	Xt_Blastula
Dr_LOC103910469;Xt_Xetrov90029323m	Dr_LOC103910469;Xt_bcl6	0	0.487935	0.487935	Eukaryota	Dr_Blastula	Xt_Blastula
Dr_LOC103910469;Xt_LOC100496561	Dr_LOC103910469;Xt_bcl6	0	0.487935	0.487935	Eukaryota	Dr_Blastula	Xt_Blastula
Dr_LOC103910469;Xt_Xetrov90001667m	Dr_LOC103910469;Xt_bcl6	0	0.487935	0.487935	Eukaryota	Dr_Blastula	Xt_Blastula
Dr_LOC103910469;Xt_LOC100493966	Dr_LOC103910469;Xt_bcl6	0	0.487935	0.487935	Eukaryota	Dr_Blastula	Xt_Blastula
Dr_LOC103910469;Xt_LOC101735121-like	Dr_LOC103910469;Xt_bcl6	0	0.487935	0.487935	Eukaryota	Dr_Blastula	Xt_Blastula
Dr_LOC103910469;Xt_LOC101734394	Dr_LOC103910469;Xt_bcl6	0	0.487935	0.487935	Eukaryota	Dr_Blastula	Xt_Blastula
Xt_bcl6;Dr_bcl6a	Xt_bcl6;Dr_LOC103910469	0	0.487935	0.487935	Eukaryota	Dr_Blastula	Xt_Blastula
Dr_hbae1;Xt_hba2	Dr_hbae1;Xt_LOC100037901	0.125083	0.612721	0.487638	Eukaryota	Dr_Blood	Xt_Blood
Dr_hbae3;Xt_hba-l3	Dr_hbae3;Xt_LOC101735171	0.112611	0.600071	0.487459	Eukaryota	Dr_Blood	Xt_Blood
Dr_LOC103908654;Xt_LOC100497179-like	Dr_LOC103908654;Xt_ctcf	0.0608449	0.548299	0.487454	Eukaryota	Dr_Blastula;Dr_Involuting marginal zone;Dr_Neuroectoderm;Dr_Non-neural ectoderm	Xt_Blastula;Xt_Involuting marginal zone;Xt_Neuroectoderm;Xt_Non-neural ectoderm
Xt_leprel4;Dr_leprel4	Xt_leprel4;Dr_crtap	0	0.48678	0.48678	Eukaryota	Dr_Notochord;Dr_Presomitic mesoderm;Dr_Skeletal muscle	Xt_Notochord;Xt_Skeletal muscle
Xt_leprel4;Dr_p3h4	Xt_leprel4;Dr_crtap	0	0.48678	0.48678	Eukaryota	Dr_Notochord;Dr_Presomitic mesoderm;Dr_Skeletal muscle	Xt_Notochord;Xt_Skeletal muscle
Xt_hba4;Dr_si:ch211-5k11.6	Xt_hba4;Dr_hbbe1.1	0	0.486727	0.486727	Eukaryota
Dr_hbae3;Xt_hba-l3	Dr_hbae3;Xt_LOC100145107	0.112611	0.599135	0.486523	Eukaryota	Dr_Blood	Xt_Blood
Dr_eya1;Xt_eya1	Dr_eya1;Xt_eya2	0	0.486311	0.486311	Eukaryota	Dr_Intermediate mesoderm;Dr_Otic placode;Dr_Placodal area;Dr_Skeletal muscle	Xt_Endothelial;Xt_Otic placode;Xt_Placodal area;Xt_Skeletal muscle
Dr_rap1aa;Xt_rap1b	Dr_rap1aa;Xt_rhebl1	0.0203458	0.506274	0.485928	Eukaryota	Dr_Involuting marginal zone;Dr_Neuroectoderm;Dr_Non-neural ectoderm	Xt_Involuting marginal zone;Xt_Neuroectoderm;Xt_Non-neural ectoderm
Dr_cebpa;Xt_cebpa	Dr_cebpa;Xt_cebpd	0	0.485336	0.485336	Eukaryota	Dr_Blood;Dr_Macrophage	Xt_Blood;Xt_Myeloid progenitors
Xt_cebpd;Dr_cebpd	Xt_cebpd;Dr_cebpa	0	0.485336	0.485336	Eukaryota	Dr_Blood;Dr_Macrophage	Xt_Blood;Xt_Myeloid progenitors
Xt_hoxc4;Dr_hoxc4a	Xt_hoxc4;Dr_hoxc6b	0	0.48514	0.48514	Eukaryota	Dr_Intermediate mesoderm;Dr_Presomitic mesoderm;Dr_Tailbud	Xt_Intermediate mesoderm;Xt_Presomitic mesoderm;Xt_Skeletal muscle;Xt_Tailbud
Dr_wu:fj11g02;Xt_LOC100488329	Dr_wu:fj11g02;Xt_fgl2	0	0.483107	0.483107	Eukaryota
Dr_wu:fj11g02;Xt_LOC100488644	Dr_wu:fj11g02;Xt_fgl2	0	0.483107	0.483107	Eukaryota
Xt_fgl2;Dr_si:ch211-236c15.2	Xt_fgl2;Dr_wu:fj11g02	0	0.483107	0.483107	Eukaryota
Dr_wu:fj11g02;Xt_LOC101731491	Dr_wu:fj11g02;Xt_fgl2	0	0.483107	0.483107	Eukaryota
Xt_fgl2;Dr_fgl2a	Xt_fgl2;Dr_wu:fj11g02	0	0.483107	0.483107	Eukaryota
Dr_zgc:174624;Xt_LOC100496403-like	Dr_zgc:174624;Xt_znf281	0.0211449	0.504249	0.483104	Eukaryota	Dr_Blastula;Dr_Involuting marginal zone;Dr_Neuroectoderm;Dr_Non-neural ectoderm	Xt_Blastula;Xt_Involuting marginal zone;Xt_Neuroectoderm;Xt_Non-neural ectoderm
Dr_rap1aa;Xt_rap1a	Dr_rap1aa;Xt_rhebl1	0.0236008	0.506274	0.482673	Eukaryota	Dr_Involuting marginal zone;Dr_Neuroectoderm;Dr_Non-neural ectoderm	Xt_Involuting marginal zone;Xt_Neuroectoderm;Xt_Non-neural ectoderm
Xt_tnni2;Dr_tnni2a.1	Xt_tnni2;Dr_tnni2b.2	0	0.482438	0.482438	Eukaryota
Xt_hoxc4;Dr_hoxc4a	Xt_hoxc4;Dr_hoxc3a	0	0.480748	0.480748	Eukaryota	Dr_Intermediate mesoderm;Dr_Presomitic mesoderm;Dr_Skeletal muscle;Dr_Tailbud	Xt_Intermediate mesoderm;Xt_Presomitic mesoderm;Xt_Skeletal muscle;Xt_Tailbud
Dr_plp1a;Xt_plp1	Dr_plp1a;Xt_gpm6b-like	0	0.476446	0.476446	Eukaryota	Dr_Forebrain/midbrain;Dr_Hindbrain;Dr_Neuron	Xt_Eye primordium;Xt_Forebrain/midbrain;Xt_Hindbrain;Xt_Neuron
Xt_gpm6b-like;Dr_gpm6bb	Xt_gpm6b-like;Dr_plp1a	0	0.476446	0.476446	Eukaryota	Dr_Forebrain/midbrain;Dr_Hindbrain;Dr_Neuron	Xt_Eye primordium;Xt_Forebrain/midbrain;Xt_Hindbrain;Xt_Neuron
Xt_gpm6b-like;Dr_gpm6ba	Xt_gpm6b-like;Dr_plp1a	0	0.476446	0.476446	Eukaryota	Dr_Forebrain/midbrain;Dr_Hindbrain;Dr_Neuron	Xt_Eye primordium;Xt_Forebrain/midbrain;Xt_Hindbrain;Xt_Neuron
Xt_anxa2;Dr_LOC100006250	Xt_anxa2;Dr_anxa11b	0.211087	0.68745	0.476363	Eukaryota	Dr_Endoderm;Dr_Epidermal progenitor;Dr_Ionocyte;Dr_Lens;Dr_Otic placode;Dr_Placodal area;Dr_Rare epidermal subtypes;Dr_Secretory epidermal	Xt_Cement gland primordium;Xt_Epidermal progenitor;Xt_Goblet cell;Xt_Hatching gland;Xt_Ionocyte;Xt_Lens;Xt_Otic placode;Xt_Placodal area;Xt_Small secretory cells
Dr_zgc:163073;Xt_myl3	Dr_zgc:163073;Xt_myl1	0	0.475841	0.475841	Eukaryota
Xt_gata4;Dr_gata4	Xt_gata4;Dr_gata6	0	0.475699	0.475699	Eukaryota	Dr_Dorsal organizer;Dr_Endoderm;Dr_Involuting marginal zone	Xt_Endoderm;Xt_Involuting marginal zone;Xt_Spemann organizer
Dr_gata6;Xt_gata6	Dr_gata6;Xt_gata4	0	0.475699	0.475699	Eukaryota	Dr_Dorsal organizer;Dr_Endoderm;Dr_Involuting marginal zone	Xt_Endoderm;Xt_Involuting marginal zone;Xt_Spemann organizer
Dr_nanos3;Xt_LOC101733512-like	Dr_nanos3;Xt_nanos1	0	0.474394	0.474394	Eukaryota
Xt_col6a1;Dr_col6a1	Xt_col6a1;Dr_col7a1l	0	0.47436	0.47436	Eukaryota	Dr_Epidermal progenitor	Xt_Epidermal progenitor
Xt_hba3;Dr_si:xx-by187g17.1	Xt_hba3;Dr_zgc:163057	0.423908	0.898187	0.474279	Eukaryota	Dr_Blood	Xt_Blood
Xt_LOC100486063;Dr_LOC100535278	Xt_LOC100486063;Dr_col7a1l	0	0.474152	0.474152	Eukaryota	Dr_Epidermal progenitor	Xt_Epidermal progenitor
Xt_LOC100486063;Dr_col6a6	Xt_LOC100486063;Dr_col7a1l	0	0.474152	0.474152	Eukaryota	Dr_Epidermal progenitor	Xt_Epidermal progenitor
Dr_hbae3;Xt_hba2	Dr_hbae3;Xt_hbe1	0.213042	0.686507	0.473464	Eukaryota	Dr_Blood	Xt_Blood
Xt_myh2;Dr_myhb	Xt_myh2;Dr_ns:zf-e68	0	0.47333	0.47333	Eukaryota	Dr_Skeletal muscle	Xt_Skeletal muscle
Xt_myh2;Dr_wu:fd14a01	Xt_myh2;Dr_ns:zf-e68	0	0.47333	0.47333	Eukaryota	Dr_Skeletal muscle	Xt_Skeletal muscle
Xt_myh2;Dr_zgc:66156	Xt_myh2;Dr_ns:zf-e68	0	0.47333	0.47333	Eukaryota	Dr_Skeletal muscle	Xt_Skeletal muscle
Xt_myh2;Dr_LOC100537594	Xt_myh2;Dr_ns:zf-e68	0	0.47333	0.47333	Eukaryota	Dr_Skeletal muscle	Xt_Skeletal muscle
Xt_etv1;Dr_etv1	Xt_etv1;Dr_etv4	0	0.472336	0.472336	Eukaryota	Dr_Endoderm;Dr_Involuting marginal zone;Dr_Neuroectoderm;Dr_Otic placode;Dr_Presomitic mesoderm;Dr_Tailbud	Xt_Endoderm;Xt_Involuting marginal zone;Xt_Neuroectoderm;Xt_Otic placode;Xt_Presomitic mesoderm;Xt_Tailbud
Dr_LOC103910469;Xt_LOC100496403-like	Dr_LOC103910469;Xt_bcl6	0.0164114	0.487935	0.471524	Eukaryota	Dr_Blastula	Xt_Blastula
Dr_tbx15;Xt_tbx15	Dr_tbx15;Xt_tbx1	0	0.471249	0.471249	Eukaryota	Dr_Intermediate mesoderm	Xt_Endothelial;Xt_Intermediate mesoderm;Xt_Spemann organizer
Xt_yy1;Dr_yy1a	Xt_yy1;Dr_zic2b	0.151543	0.621946	0.470403	Eukaryota	Dr_Dorsal organizer;Dr_Involuting marginal zone;Dr_Neuroectoderm;Dr_Non-neural ectoderm	Xt_Involuting marginal zone;Xt_Neuroectoderm;Xt_Non-neural ectoderm;Xt_Spemann organizer
Xt_chrng;Dr_chrne	Xt_chrng;Dr_chrnd	0.263603	0.733555	0.469951	Eukaryota	Dr_Skeletal muscle	Xt_Skeletal muscle
Xt_rundc3a;Dr_LOC100148117	Xt_rundc3a;Dr_rufy3	0	0.467723	0.467723	Eukaryota	Dr_Neuron;Dr_Rohon-beard neuron	Xt_Neuron;Xt_Rohon-beard neuron
Xt_zbtb10;Dr_zbtb10	Xt_zbtb10;Dr_LOC797788	0.0152839	0.482907	0.467623	Eukaryota
Dr_etv4;Xt_etv4	Dr_etv4;Xt_etv1	0.00492824	0.472336	0.467408	Eukaryota	Dr_Endoderm;Dr_Involuting marginal zone;Dr_Neuroectoderm;Dr_Otic placode;Dr_Presomitic mesoderm;Dr_Tailbud	Xt_Endoderm;Xt_Involuting marginal zone;Xt_Neuroectoderm;Xt_Otic placode;Xt_Presomitic mesoderm;Xt_Tailbud
Xt_hba4;Dr_si:ch211-5k11.6	Xt_hba4;Dr_hbbe2	0	0.467165	0.467165	Eukaryota
Xt_hoxa11;Dr_hoxa11b	Xt_hoxa11;Dr_hoxd12a	0	0.46683	0.46683	Eukaryota	Dr_Presomitic mesoderm	Xt_Presomitic mesoderm
Xt_klhl30;Dr_klhl30	Xt_klhl30;Dr_klhl31	0	0.464482	0.464482	Eukaryota	Dr_Skeletal muscle	Xt_Skeletal muscle
Dr_LOC100149066;Xt_hes8	Dr_LOC100149066;Xt_hes6.2	0	0.46321	0.46321	Eukaryota	Dr_Forebrain/midbrain	Xt_Forebrain/midbrain
Xt_hes6.2;Dr_her8.2	Xt_hes6.2;Dr_LOC100149066	0	0.46321	0.46321	Eukaryota	Dr_Forebrain/midbrain	Xt_Forebrain/midbrain
Dr_LOC103908654;Xt_Xetrov90015419m	Dr_LOC103908654;Xt_ctcf	0.0864905	0.548299	0.461809	Eukaryota	Dr_Blastula;Dr_Involuting marginal zone;Dr_Neuroectoderm;Dr_Non-neural ectoderm	Xt_Blastula;Xt_Involuting marginal zone;Xt_Neuroectoderm;Xt_Non-neural ectoderm
Xt_hnrnpa0;Dr_hnrnpa0b	Xt_hnrnpa0;Dr_hnrpdl	0	0.460729	0.460729	Eukaryota
Xt_hnrnpa0;Dr_hnrnpa0l	Xt_hnrnpa0;Dr_hnrpdl	0	0.460729	0.460729	Eukaryota
Dr_capn2b;Xt_LOC101733523	Dr_capn2b;Xt_capn13	0	0.460599	0.460599	Eukaryota	Dr_Epidermal progenitor;Dr_Hatching gland;Dr_Ionocyte;Dr_Rare epidermal subtypes;Dr_Secretory epidermal	Xt_Cement gland primordium;Xt_Epidermal progenitor;Xt_Goblet cell;Xt_Hatching gland;Xt_Ionocyte;Xt_Small secretory cells
Dr_hbae1;Xt_hba2	Dr_hbae1;Xt_LOC100145107	0.125083	0.585398	0.460314	Eukaryota	Dr_Blood	Xt_Blood
Dr_tagln2;Xt_tagln	Dr_tagln2;Xt_tagln2	0	0.459922	0.459922	Eukaryota	Dr_Endoderm;Dr_Endothelial;Dr_Epidermal progenitor;Dr_Hatching gland;Dr_Ionocyte;Dr_Notoplate;Dr_Placodal area;Dr_Rare epidermal subtypes	Xt_Endothelial;Xt_Epidermal progenitor;Xt_Hatching gland;Xt_Ionocyte;Xt_Notoplate;Xt_Placodal area;Xt_Small secretory cells
Dr_cetn2;Xt_cetn1	Dr_cetn2;Xt_LOC100493285	0	0.459904	0.459904	Eukaryota
Xt_dnah1;Dr_LOC103911852	Xt_dnah1;Dr_si:dkeyp-87a6.1	0.104767	0.564583	0.459815	Eukaryota
Dr_LOC103908654;Xt_LOC100495499	Dr_LOC103908654;Xt_ctcf	0.088723	0.548299	0.459576	Eukaryota	Dr_Blastula;Dr_Involuting marginal zone;Dr_Neuroectoderm;Dr_Non-neural ectoderm	Xt_Blastula;Xt_Involuting marginal zone;Xt_Neuroectoderm;Xt_Non-neural ectoderm
Dr_foxh1;Xt_foxh1	Dr_foxh1;Xt_foxi4.2	0.131915	0.591096	0.459182	Eukaryota	Dr_Neuroectoderm;Dr_Non-neural ectoderm	Xt_Neuroectoderm;Xt_Non-neural ectoderm
Dr_dpysl5a;Xt_dpysl5	Dr_dpysl5a;Xt_dpysl4	0	0.458092	0.458092	Eukaryota	Dr_Forebrain/midbrain;Dr_Hindbrain;Dr_Neuron;Dr_Rohon-beard neuron	Xt_Eye primordium;Xt_Forebrain/midbrain;Xt_Hindbrain;Xt_Neuron;Xt_Rohon-beard neuron
Xt_dpysl4;Dr_dpysl4	Xt_dpysl4;Dr_dpysl5a	0	0.458092	0.458092	Eukaryota	Dr_Forebrain/midbrain;Dr_Hindbrain;Dr_Neuron;Dr_Rohon-beard neuron	Xt_Eye primordium;Xt_Forebrain/midbrain;Xt_Hindbrain;Xt_Neuron;Xt_Rohon-beard neuron
Dr_zgc:174702;Xt_znf250	Dr_zgc:174702;Xt_ctcf	0	0.458005	0.458005	Eukaryota
Dr_zgc:174702;Xt_Xetrov90029323m	Dr_zgc:174702;Xt_ctcf	0	0.458005	0.458005	Eukaryota
Dr_zgc:174702;Xt_znf383	Dr_zgc:174702;Xt_ctcf	0	0.458005	0.458005	Eukaryota
Dr_zgc:174702;Xt_Xetrov90015421m	Dr_zgc:174702;Xt_ctcf	0	0.458005	0.458005	Eukaryota
Dr_zgc:174702;Xt_Xetrov90015419m	Dr_zgc:174702;Xt_ctcf	0	0.458005	0.458005	Eukaryota
Dr_zgc:174702;Xt_Xetrov90008367m	Dr_zgc:174702;Xt_ctcf	0	0.458005	0.458005	Eukaryota
Dr_zgc:174702;Xt_LOC100493966	Dr_zgc:174702;Xt_ctcf	0	0.458005	0.458005	Eukaryota
Dr_zgc:174702;Xt_znf329	Dr_zgc:174702;Xt_ctcf	0	0.458005	0.458005	Eukaryota
Dr_zgc:174702;Xt_LOC101735121-like	Dr_zgc:174702;Xt_ctcf	0	0.458005	0.458005	Eukaryota
Dr_zgc:174702;Xt_LOC101734394	Dr_zgc:174702;Xt_ctcf	0	0.458005	0.458005	Eukaryota
Dr_zgc:174702;Xt_LOC100497179-like	Dr_zgc:174702;Xt_ctcf	0	0.458005	0.458005	Eukaryota
Dr_zgc:174702;Xt_LOC100496561	Dr_zgc:174702;Xt_ctcf	0	0.458005	0.458005	Eukaryota
Dr_zgc:174702;Xt_LOC100496403-like	Dr_zgc:174702;Xt_ctcf	0	0.458005	0.458005	Eukaryota
Dr_zgc:174702;Xt_LOC100495499	Dr_zgc:174702;Xt_ctcf	0	0.458005	0.458005	Eukaryota
Dr_zgc:174702;Xt_Xetrov90001667m	Dr_zgc:174702;Xt_ctcf	0	0.458005	0.458005	Eukaryota
Xt_anxa2;Dr_LOC100006250	Xt_anxa2;Dr_LOC103908630	0.211087	0.66881	0.457722	Eukaryota	Dr_Endoderm;Dr_Epidermal progenitor;Dr_Ionocyte;Dr_Lens;Dr_Otic placode;Dr_Placodal area;Dr_Rare epidermal subtypes;Dr_Secretory epidermal	Xt_Cement gland primordium;Xt_Epidermal progenitor;Xt_Goblet cell;Xt_Hatching gland;Xt_Ionocyte;Xt_Lens;Xt_Otic placode;Xt_Placodal area;Xt_Small secretory cells
Xt_hbz;Dr_si:xx-by187g17.1	Xt_hbz;Dr_hbbe3	0.353392	0.810858	0.457466	Eukaryota	Dr_Blood	Xt_Blood
Xt_hba1;Dr_hbaa1	Xt_hba1;Dr_zgc:163057	0	0.455607	0.455607	Eukaryota	Dr_Blood	Xt_Blood
Xt_hba1;Dr_si:ch211-5k11.6	Xt_hba1;Dr_zgc:163057	0	0.455607	0.455607	Eukaryota	Dr_Blood	Xt_Blood
Dr_hoxd13a;Xt_hoxd13	Dr_hoxd13a;Xt_hoxd10	0	0.455528	0.455528	Eukaryota	Dr_Presomitic mesoderm	Xt_Presomitic mesoderm;Xt_Tailbud
Xt_cetn3;Dr_cetn3	Xt_cetn3;Dr_cetn2	0.0810077	0.536507	0.455499	Eukaryota
Dr_LOC103910469;Xt_Xetrov90008367m	Dr_LOC103910469;Xt_bcl6	0.0329031	0.487935	0.455032	Eukaryota	Dr_Blastula	Xt_Blastula
Xt_hmgb3;Dr_hmgb3a	Xt_hmgb3;Dr_ubtf	0.103835	0.558048	0.454214	Eukaryota	Dr_Dorsal organizer;Dr_Involuting marginal zone;Dr_Neuroectoderm;Dr_Non-neural ectoderm;Dr_Presomitic mesoderm;Dr_Tailbud	Xt_Hindbrain;Xt_Involuting marginal zone;Xt_Neuroectoderm;Xt_Non-neural ectoderm;Xt_Spemann organizer;Xt_Tailbud
Xt_tnni1.2;Dr_zgc:112242	Xt_tnni1.2;Dr_tnni2a.4	0	0.454184	0.454184	Eukaryota
Dr_tox;Xt_tox	Dr_tox;Xt_tox2	0.0906675	0.544291	0.453624	Eukaryota	Dr_Eye primordium;Dr_Forebrain/midbrain;Dr_Hindbrain;Dr_Neuron;Dr_Optic;Dr_Tailbud	Xt_Eye primordium;Xt_Forebrain/midbrain;Xt_Hindbrain;Xt_Neuron;Xt_Optic
Dr_col7a1l;Xt_Xetrov90008423m	Dr_col7a1l;Xt_col6a1	0.0210717	0.47436	0.453288	Eukaryota	Dr_Epidermal progenitor	Xt_Epidermal progenitor
Dr_fmoda;Xt_fmod	Dr_fmoda;Xt_bgn	0	0.453098	0.453098	Eukaryota	Dr_Intermediate mesoderm	Xt_Endothelial;Xt_Intermediate mesoderm
Xt_bgn;Dr_bgnb	Xt_bgn;Dr_fmoda	0	0.453098	0.453098	Eukaryota	Dr_Intermediate mesoderm	Xt_Endothelial;Xt_Intermediate mesoderm
Xt_bgn;Dr_bgna	Xt_bgn;Dr_fmoda	0	0.453098	0.453098	Eukaryota	Dr_Intermediate mesoderm	Xt_Endothelial;Xt_Intermediate mesoderm
Dr_col7a1l;Xt_Xetrov90008423m	Dr_col7a1l;Xt_LOC100486063	0.0210717	0.474152	0.45308	Eukaryota	Dr_Epidermal progenitor	Xt_Epidermal progenitor
Dr_znf1137;Xt_znf383	Dr_znf1137;Xt_znf281	0.0917356	0.544638	0.452902	Eukaryota	Dr_Blastula;Dr_Involuting marginal zone;Dr_Neuroectoderm;Dr_Non-neural ectoderm	Xt_Blastula;Xt_Involuting marginal zone;Xt_Neuroectoderm;Xt_Non-neural ectoderm
Dr_zgc:113886;Xt_Xetrov90015419m	Dr_zgc:113886;Xt_znf518b	0.141539	0.593618	0.452078	Eukaryota	Dr_Blastula	Xt_Blastula
Xt_znf281;Dr_LOC100005963	Xt_znf281;Dr_si:ch211-198a12.6	0	0.451679	0.451679	Eukaryota	Dr_Involuting marginal zone;Dr_Neuroectoderm;Dr_Non-neural ectoderm	Xt_Involuting marginal zone;Xt_Neuroectoderm;Xt_Non-neural ectoderm
Dr_si:ch211-241b2.1;Xt_LOC100496561	Dr_si:ch211-241b2.1;Xt_zbtb10	0	0.450998	0.450998	Eukaryota
Dr_si:ch211-241b2.1;Xt_znf383	Dr_si:ch211-241b2.1;Xt_zbtb10	0	0.450998	0.450998	Eukaryota
Dr_si:ch211-241b2.1;Xt_LOC100496403-like	Dr_si:ch211-241b2.1;Xt_zbtb10	0	0.450998	0.450998	Eukaryota
Dr_si:ch211-241b2.1;Xt_znf329	Dr_si:ch211-241b2.1;Xt_zbtb10	0	0.450998	0.450998	Eukaryota
Dr_si:ch211-241b2.1;Xt_LOC100497179-like	Dr_si:ch211-241b2.1;Xt_zbtb10	0	0.450998	0.450998	Eukaryota
Dr_si:ch211-241b2.1;Xt_znf250	Dr_si:ch211-241b2.1;Xt_zbtb10	0	0.450998	0.450998	Eukaryota
Dr_si:ch211-241b2.1;Xt_Xetrov90008367m	Dr_si:ch211-241b2.1;Xt_zbtb10	0	0.450998	0.450998	Eukaryota
Dr_si:ch211-241b2.1;Xt_Xetrov90029323m	Dr_si:ch211-241b2.1;Xt_zbtb10	0	0.450998	0.450998	Eukaryota
Dr_si:ch211-241b2.1;Xt_Xetrov90015421m	Dr_si:ch211-241b2.1;Xt_zbtb10	0	0.450998	0.450998	Eukaryota
Dr_si:ch211-241b2.1;Xt_LOC100493966	Dr_si:ch211-241b2.1;Xt_zbtb10	0	0.450998	0.450998	Eukaryota
Dr_si:ch211-241b2.1;Xt_Xetrov90015419m	Dr_si:ch211-241b2.1;Xt_zbtb10	0	0.450998	0.450998	Eukaryota
Dr_si:ch211-241b2.1;Xt_Xetrov90001667m	Dr_si:ch211-241b2.1;Xt_zbtb10	0	0.450998	0.450998	Eukaryota
Dr_si:ch211-241b2.1;Xt_LOC101734394	Dr_si:ch211-241b2.1;Xt_zbtb10	0	0.450998	0.450998	Eukaryota
Dr_si:ch211-241b2.1;Xt_LOC101735121-like	Dr_si:ch211-241b2.1;Xt_zbtb10	0	0.450998	0.450998	Eukaryota
Dr_si:ch211-241b2.1;Xt_LOC100495499	Dr_si:ch211-241b2.1;Xt_zbtb10	0	0.450998	0.450998	Eukaryota
Dr_cbx5;Xt_cbx5-like	Dr_cbx5;Xt_cbx3	0.107567	0.558002	0.450434	Eukaryota
Xt_hbz;Dr_si:xx-by187g17.1	Xt_hbz;Dr_MGC173646	0.353392	0.803561	0.450169	Eukaryota	Dr_Blood	Xt_Blood
Dr_hoxa13b;Xt_hoxa13	Dr_hoxa13b;Xt_hoxd10	0	0.449483	0.449483	Eukaryota
Xt_myh4;Dr_LOC100537594	Xt_myh4;Dr_myhz1.1	0	0.44902	0.44902	Eukaryota
Xt_myh4;Dr_myhb	Xt_myh4;Dr_myhz1.1	0	0.44902	0.44902	Eukaryota
Xt_myh4;Dr_wu:fd14a01	Xt_myh4;Dr_myhz1.1	0	0.44902	0.44902	Eukaryota
Xt_myh4;Dr_zgc:66156	Xt_myh4;Dr_myhz1.1	0	0.44902	0.44902	Eukaryota
Dr_LOC570015;Xt_Xetrov90029323m	Dr_LOC570015;Xt_vezf1	0	0.44885	0.44885	Eukaryota	Dr_Dorsal organizer;Dr_Involuting marginal zone;Dr_Neuroectoderm;Dr_Non-neural ectoderm;Dr_Notochord;Dr_Tailbud	Xt_Involuting marginal zone;Xt_Neuroectoderm;Xt_Non-neural ectoderm;Xt_Spemann organizer;Xt_Tailbud
Dr_LOC570015;Xt_LOC100497179-like	Dr_LOC570015;Xt_vezf1	0	0.44885	0.44885	Eukaryota	Dr_Dorsal organizer;Dr_Involuting marginal zone;Dr_Neuroectoderm;Dr_Non-neural ectoderm;Dr_Notochord;Dr_Tailbud	Xt_Involuting marginal zone;Xt_Neuroectoderm;Xt_Non-neural ectoderm;Xt_Spemann organizer;Xt_Tailbud
Dr_LOC570015;Xt_znf329	Dr_LOC570015;Xt_vezf1	0	0.44885	0.44885	Eukaryota	Dr_Dorsal organizer;Dr_Involuting marginal zone;Dr_Neuroectoderm;Dr_Non-neural ectoderm;Dr_Notochord;Dr_Tailbud	Xt_Involuting marginal zone;Xt_Neuroectoderm;Xt_Non-neural ectoderm;Xt_Spemann organizer;Xt_Tailbud
Dr_LOC570015;Xt_znf250	Dr_LOC570015;Xt_vezf1	0	0.44885	0.44885	Eukaryota	Dr_Dorsal organizer;Dr_Involuting marginal zone;Dr_Neuroectoderm;Dr_Non-neural ectoderm;Dr_Notochord;Dr_Tailbud	Xt_Involuting marginal zone;Xt_Neuroectoderm;Xt_Non-neural ectoderm;Xt_Spemann organizer;Xt_Tailbud
Dr_LOC570015;Xt_Xetrov90001667m	Dr_LOC570015;Xt_vezf1	0	0.44885	0.44885	Eukaryota	Dr_Dorsal organizer;Dr_Involuting marginal zone;Dr_Neuroectoderm;Dr_Non-neural ectoderm;Dr_Notochord;Dr_Tailbud	Xt_Involuting marginal zone;Xt_Neuroectoderm;Xt_Non-neural ectoderm;Xt_Spemann organizer;Xt_Tailbud
Dr_LOC570015;Xt_LOC100496561	Dr_LOC570015;Xt_vezf1	0	0.44885	0.44885	Eukaryota	Dr_Dorsal organizer;Dr_Involuting marginal zone;Dr_Neuroectoderm;Dr_Non-neural ectoderm;Dr_Notochord;Dr_Tailbud	Xt_Involuting marginal zone;Xt_Neuroectoderm;Xt_Non-neural ectoderm;Xt_Spemann organizer;Xt_Tailbud
Dr_LOC570015;Xt_znf383	Dr_LOC570015;Xt_vezf1	0	0.44885	0.44885	Eukaryota	Dr_Dorsal organizer;Dr_Involuting marginal zone;Dr_Neuroectoderm;Dr_Non-neural ectoderm;Dr_Notochord;Dr_Tailbud	Xt_Involuting marginal zone;Xt_Neuroectoderm;Xt_Non-neural ectoderm;Xt_Spemann organizer;Xt_Tailbud
Dr_LOC570015;Xt_LOC100496403-like	Dr_LOC570015;Xt_vezf1	0	0.44885	0.44885	Eukaryota	Dr_Dorsal organizer;Dr_Involuting marginal zone;Dr_Neuroectoderm;Dr_Non-neural ectoderm;Dr_Notochord;Dr_Tailbud	Xt_Involuting marginal zone;Xt_Neuroectoderm;Xt_Non-neural ectoderm;Xt_Spemann organizer;Xt_Tailbud
Dr_LOC570015;Xt_Xetrov90008367m	Dr_LOC570015;Xt_vezf1	0	0.44885	0.44885	Eukaryota	Dr_Dorsal organizer;Dr_Involuting marginal zone;Dr_Neuroectoderm;Dr_Non-neural ectoderm;Dr_Notochord;Dr_Tailbud	Xt_Involuting marginal zone;Xt_Neuroectoderm;Xt_Non-neural ectoderm;Xt_Spemann organizer;Xt_Tailbud
Dr_LOC570015;Xt_LOC100493966	Dr_LOC570015;Xt_vezf1	0	0.44885	0.44885	Eukaryota	Dr_Dorsal organizer;Dr_Involuting marginal zone;Dr_Neuroectoderm;Dr_Non-neural ectoderm;Dr_Notochord;Dr_Tailbud	Xt_Involuting marginal zone;Xt_Neuroectoderm;Xt_Non-neural ectoderm;Xt_Spemann organizer;Xt_Tailbud
Dr_LOC570015;Xt_Xetrov90015419m	Dr_LOC570015;Xt_vezf1	0	0.44885	0.44885	Eukaryota	Dr_Dorsal organizer;Dr_Involuting marginal zone;Dr_Neuroectoderm;Dr_Non-neural ectoderm;Dr_Notochord;Dr_Tailbud	Xt_Involuting marginal zone;Xt_Neuroectoderm;Xt_Non-neural ectoderm;Xt_Spemann organizer;Xt_Tailbud
Dr_LOC570015;Xt_LOC100495499	Dr_LOC570015;Xt_vezf1	0	0.44885	0.44885	Eukaryota	Dr_Dorsal organizer;Dr_Involuting marginal zone;Dr_Neuroectoderm;Dr_Non-neural ectoderm;Dr_Notochord;Dr_Tailbud	Xt_Involuting marginal zone;Xt_Neuroectoderm;Xt_Non-neural ectoderm;Xt_Spemann organizer;Xt_Tailbud
Dr_LOC570015;Xt_Xetrov90015421m	Dr_LOC570015;Xt_vezf1	0	0.44885	0.44885	Eukaryota	Dr_Dorsal organizer;Dr_Involuting marginal zone;Dr_Neuroectoderm;Dr_Non-neural ectoderm;Dr_Notochord;Dr_Tailbud	Xt_Involuting marginal zone;Xt_Neuroectoderm;Xt_Non-neural ectoderm;Xt_Spemann organizer;Xt_Tailbud
Dr_LOC570015;Xt_LOC101735121-like	Dr_LOC570015;Xt_vezf1	0	0.44885	0.44885	Eukaryota	Dr_Dorsal organizer;Dr_Involuting marginal zone;Dr_Neuroectoderm;Dr_Non-neural ectoderm;Dr_Notochord;Dr_Tailbud	Xt_Involuting marginal zone;Xt_Neuroectoderm;Xt_Non-neural ectoderm;Xt_Spemann organizer;Xt_Tailbud
Dr_ccnb3;Xt_ccnb3	Dr_ccnb3;Xt_ccnb1.2	0.178002	0.626045	0.448043	Eukaryota	Dr_Involuting marginal zone;Dr_Neuroectoderm;Dr_Non-neural ectoderm	Xt_Involuting marginal zone;Xt_Neuroectoderm;Xt_Non-neural ectoderm
Dr_hoxc9a;Xt_hoxc9	Dr_hoxc9a;Xt_hoxd10	0.145358	0.593134	0.447775	Eukaryota	Dr_Presomitic mesoderm;Dr_Tailbud	Xt_Presomitic mesoderm;Xt_Tailbud
Dr_si:ch211-5k11.2;Xt_hba2	Dr_si:ch211-5k11.2;Xt_LOC100216007	0.213684	0.661375	0.447691	Eukaryota	Dr_Blood	Xt_Blood
Dr_zgc:113886;Xt_Xetrov90015419m	Dr_zgc:113886;Xt_bcl6	0.141539	0.589105	0.447566	Eukaryota	Dr_Blastula	Xt_Blastula
Dr_hbae1;Xt_hba2	Dr_hbae1;Xt_LOC101735171	0.125083	0.571591	0.446508	Eukaryota	Dr_Blood	Xt_Blood
Dr_LOC570015;Xt_LOC101734394	Dr_LOC570015;Xt_vezf1	0.00262063	0.44885	0.446229	Eukaryota	Dr_Dorsal organizer;Dr_Involuting marginal zone;Dr_Neuroectoderm;Dr_Non-neural ectoderm;Dr_Notochord;Dr_Tailbud	Xt_Involuting marginal zone;Xt_Neuroectoderm;Xt_Non-neural ectoderm;Xt_Spemann organizer;Xt_Tailbud
Xt_hes6.2;Dr_her8.2	Xt_hes6.2;Dr_her4.2	0	0.446027	0.446027	Eukaryota	Dr_Forebrain/midbrain;Dr_Neuron	Xt_Forebrain/midbrain;Xt_Neuron
Dr_her4.2;Xt_hes8	Dr_her4.2;Xt_hes6.2	0	0.446027	0.446027	Eukaryota	Dr_Forebrain/midbrain;Dr_Neuron	Xt_Forebrain/midbrain;Xt_Neuron
Dr_rpl22l1;Xt_rpl22l1	Dr_rpl22l1;Xt_rpl22	0.332752	0.778778	0.446026	Eukaryota	Dr_Blood;Dr_Endothelial;Dr_Eye primordium;Dr_Forebrain/midbrain;Dr_Hindbrain;Dr_Intermediate mesoderm;Dr_Lens;Dr_Macrophage;Dr_Neural crest;Dr_Optic;Dr_Otic placode;Dr_Placodal area;Dr_Presomitic mesoderm;Dr_Rare epidermal subtypes;Dr_Skeletal muscle	Xt_Blood;Xt_Endothelial;Xt_Eye primordium;Xt_Forebrain/midbrain;Xt_Hindbrain;Xt_Intermediate mesoderm;Xt_Lens;Xt_Myeloid progenitors;Xt_Neural crest;Xt_Optic;Xt_Otic placode;Xt_Placodal area;Xt_Presomitic mesoderm;Xt_Pronephric mesenchyme;Xt_Skeletal muscle;Xt_Small secretory cells
Dr_odc1;Xt_LOC100498594	Dr_odc1;Xt_azin1	0.00917722	0.454926	0.445749	Eukaryota	Dr_Dorsal organizer;Dr_Eye primordium;Dr_Neuroectoderm;Dr_Non-neural ectoderm;Dr_Notochord;Dr_Tailbud	Xt_Eye primordium;Xt_Hindbrain;Xt_Neuroectoderm;Xt_Non-neural ectoderm;Xt_Spemann organizer;Xt_Tailbud
Dr_zgc:174275;Xt_Xetrov90008367m	Dr_zgc:174275;Xt_znf281	0.0885381	0.533807	0.445269	Eukaryota	Dr_Blastula;Dr_Involuting marginal zone;Dr_Neuroectoderm;Dr_Non-neural ectoderm	Xt_Blastula;Xt_Involuting marginal zone;Xt_Neuroectoderm;Xt_Non-neural ectoderm
Dr_zgc:171687;Xt_LOC100488329	Dr_zgc:171687;Xt_fgl2	0	0.445188	0.445188	Eukaryota
Xt_fgl2;Dr_si:ch211-236c15.2	Xt_fgl2;Dr_zgc:171687	0	0.445188	0.445188	Eukaryota
Dr_zgc:171687;Xt_LOC100488644	Dr_zgc:171687;Xt_fgl2	0	0.445188	0.445188	Eukaryota
Dr_zgc:171687;Xt_LOC101731491	Dr_zgc:171687;Xt_fgl2	0	0.445188	0.445188	Eukaryota
Xt_fgl2;Dr_fgl2a	Xt_fgl2;Dr_zgc:171687	0	0.445188	0.445188	Eukaryota
Dr_zgc:173619;Xt_znf329	Dr_zgc:173619;Xt_sp3	0	0.445146	0.445146	Eukaryota	Dr_Involuting marginal zone;Dr_Neuroectoderm;Dr_Non-neural ectoderm	Xt_Involuting marginal zone;Xt_Neuroectoderm;Xt_Non-neural ectoderm
Dr_zgc:173619;Xt_Xetrov90029323m	Dr_zgc:173619;Xt_sp3	0	0.445146	0.445146	Eukaryota	Dr_Involuting marginal zone;Dr_Neuroectoderm;Dr_Non-neural ectoderm	Xt_Involuting marginal zone;Xt_Neuroectoderm;Xt_Non-neural ectoderm
Dr_zgc:173619;Xt_Xetrov90015419m	Dr_zgc:173619;Xt_sp3	0	0.445146	0.445146	Eukaryota	Dr_Involuting marginal zone;Dr_Neuroectoderm;Dr_Non-neural ectoderm	Xt_Involuting marginal zone;Xt_Neuroectoderm;Xt_Non-neural ectoderm
Dr_zgc:173619;Xt_LOC101735121-like	Dr_zgc:173619;Xt_sp3	0	0.445146	0.445146	Eukaryota	Dr_Involuting marginal zone;Dr_Neuroectoderm;Dr_Non-neural ectoderm	Xt_Involuting marginal zone;Xt_Neuroectoderm;Xt_Non-neural ectoderm
Dr_zgc:173619;Xt_Xetrov90008367m	Dr_zgc:173619;Xt_sp3	0	0.445146	0.445146	Eukaryota	Dr_Involuting marginal zone;Dr_Neuroectoderm;Dr_Non-neural ectoderm	Xt_Involuting marginal zone;Xt_Neuroectoderm;Xt_Non-neural ectoderm
Dr_zgc:173619;Xt_LOC100496561	Dr_zgc:173619;Xt_sp3	0	0.445146	0.445146	Eukaryota	Dr_Involuting marginal zone;Dr_Neuroectoderm;Dr_Non-neural ectoderm	Xt_Involuting marginal zone;Xt_Neuroectoderm;Xt_Non-neural ectoderm
Dr_zgc:173619;Xt_Xetrov90015421m	Dr_zgc:173619;Xt_sp3	0	0.445146	0.445146	Eukaryota	Dr_Involuting marginal zone;Dr_Neuroectoderm;Dr_Non-neural ectoderm	Xt_Involuting marginal zone;Xt_Neuroectoderm;Xt_Non-neural ectoderm
Dr_zgc:173619;Xt_LOC100496403-like	Dr_zgc:173619;Xt_sp3	0	0.445146	0.445146	Eukaryota	Dr_Involuting marginal zone;Dr_Neuroectoderm;Dr_Non-neural ectoderm	Xt_Involuting marginal zone;Xt_Neuroectoderm;Xt_Non-neural ectoderm
Dr_zgc:173619;Xt_Xetrov90001667m	Dr_zgc:173619;Xt_sp3	0	0.445146	0.445146	Eukaryota	Dr_Involuting marginal zone;Dr_Neuroectoderm;Dr_Non-neural ectoderm	Xt_Involuting marginal zone;Xt_Neuroectoderm;Xt_Non-neural ectoderm
Dr_zgc:173619;Xt_znf250	Dr_zgc:173619;Xt_sp3	0	0.445146	0.445146	Eukaryota	Dr_Involuting marginal zone;Dr_Neuroectoderm;Dr_Non-neural ectoderm	Xt_Involuting marginal zone;Xt_Neuroectoderm;Xt_Non-neural ectoderm
Dr_zgc:173619;Xt_LOC101734394	Dr_zgc:173619;Xt_sp3	0	0.445146	0.445146	Eukaryota	Dr_Involuting marginal zone;Dr_Neuroectoderm;Dr_Non-neural ectoderm	Xt_Involuting marginal zone;Xt_Neuroectoderm;Xt_Non-neural ectoderm
Dr_zgc:173619;Xt_LOC100497179-like	Dr_zgc:173619;Xt_sp3	0	0.445146	0.445146	Eukaryota	Dr_Involuting marginal zone;Dr_Neuroectoderm;Dr_Non-neural ectoderm	Xt_Involuting marginal zone;Xt_Neuroectoderm;Xt_Non-neural ectoderm
Dr_zgc:173619;Xt_LOC100493966	Dr_zgc:173619;Xt_sp3	0	0.445146	0.445146	Eukaryota	Dr_Involuting marginal zone;Dr_Neuroectoderm;Dr_Non-neural ectoderm	Xt_Involuting marginal zone;Xt_Neuroectoderm;Xt_Non-neural ectoderm
Dr_znf1137;Xt_Xetrov90008367m	Dr_znf1137;Xt_znf281	0.0995665	0.544638	0.445071	Eukaryota	Dr_Blastula;Dr_Involuting marginal zone;Dr_Neuroectoderm;Dr_Non-neural ectoderm	Xt_Blastula;Xt_Involuting marginal zone;Xt_Neuroectoderm;Xt_Non-neural ectoderm
Xt_hba-l2;Dr_si:xx-by187g17.1	Xt_hba-l2;Dr_hbbe3	0.25417	0.699084	0.444913	Eukaryota	Dr_Blood	Xt_Blood
Dr_si:ch211-5k11.2;Xt_hba2	Dr_si:ch211-5k11.2;Xt_LOC100037901	0.213684	0.658469	0.444786	Eukaryota	Dr_Blood	Xt_Blood
Dr_LOC100148329;Xt_hes8	Dr_LOC100148329;Xt_hes6.2	0	0.444714	0.444714	Eukaryota	Dr_Forebrain/midbrain	Xt_Forebrain/midbrain
Xt_hes6.2;Dr_her8.2	Xt_hes6.2;Dr_LOC100148329	0	0.444714	0.444714	Eukaryota	Dr_Forebrain/midbrain	Xt_Forebrain/midbrain
Dr_zgc:174275;Xt_Xetrov90029323m	Dr_zgc:174275;Xt_znf281	0.0892534	0.533807	0.444553	Eukaryota	Dr_Blastula;Dr_Involuting marginal zone;Dr_Neuroectoderm;Dr_Non-neural ectoderm	Xt_Blastula;Xt_Involuting marginal zone;Xt_Neuroectoderm;Xt_Non-neural ectoderm
Xt_hba-l5;Dr_si:xx-by187g17.1	Xt_hba-l5;Dr_MGC173646	0.405273	0.849482	0.444209	Eukaryota	Dr_Blood	Xt_Blood
Dr_znf1137;Xt_Xetrov90029323m	Dr_znf1137;Xt_znf281	0.101205	0.544638	0.443433	Eukaryota	Dr_Blastula;Dr_Involuting marginal zone;Dr_Neuroectoderm;Dr_Non-neural ectoderm	Xt_Blastula;Xt_Involuting marginal zone;Xt_Neuroectoderm;Xt_Non-neural ectoderm
Xt_Xetrov90012559m;Dr_rbm5	Xt_Xetrov90012559m;Dr_LOC567058	0	0.442621	0.442621	Eukaryota	Dr_Dorsal organizer;Dr_Involuting marginal zone;Dr_Neuroectoderm;Dr_Non-neural ectoderm;Dr_Notochord;Dr_Tailbud	Xt_Involuting marginal zone;Xt_Neuroectoderm;Xt_Non-neural ectoderm;Xt_Spemann organizer;Xt_Tailbud
Dr_LOC100334599;Xt_hba2	Dr_LOC100334599;Xt_LOC100216007	0.219352	0.661779	0.442427	Eukaryota	Dr_Blood	Xt_Blood
Xt_rnf5;Dr_rnf5	Xt_rnf5;Dr_rnf185	0	0.442384	0.442384	Eukaryota	Dr_Blastula;Dr_Involuting marginal zone;Dr_Neuroectoderm	Xt_Blastula;Xt_Involuting marginal zone;Xt_Neuroectoderm
Xt_bcl6;Dr_bcl6a	Xt_bcl6;Dr_LOC103908671	0	0.44169	0.44169	Eukaryota	Dr_Blastula	Xt_Blastula
Dr_znf1137;Xt_znf250	Dr_znf1137;Xt_sp1	0	0.441441	0.441441	Eukaryota
Dr_znf1137;Xt_znf329	Dr_znf1137;Xt_sp1	0	0.441441	0.441441	Eukaryota
Dr_znf1137;Xt_LOC100493966	Dr_znf1137;Xt_sp1	0	0.441441	0.441441	Eukaryota
Dr_LOC103909095;Xt_znf250	Dr_LOC103909095;Xt_znf281	0	0.441323	0.441323	Eukaryota	Dr_Blastula;Dr_Dorsal organizer;Dr_Involuting marginal zone;Dr_Neuroectoderm	Xt_Blastula;Xt_Involuting marginal zone;Xt_Neuroectoderm;Xt_Non-neural ectoderm;Xt_Spemann organizer
Dr_LOC103909095;Xt_LOC101734394	Dr_LOC103909095;Xt_znf281	0	0.441323	0.441323	Eukaryota	Dr_Blastula;Dr_Dorsal organizer;Dr_Involuting marginal zone;Dr_Neuroectoderm	Xt_Blastula;Xt_Involuting marginal zone;Xt_Neuroectoderm;Xt_Non-neural ectoderm;Xt_Spemann organizer
Dr_LOC103909095;Xt_LOC100493966	Dr_LOC103909095;Xt_znf281	0	0.441323	0.441323	Eukaryota	Dr_Blastula;Dr_Dorsal organizer;Dr_Involuting marginal zone;Dr_Neuroectoderm	Xt_Blastula;Xt_Involuting marginal zone;Xt_Neuroectoderm;Xt_Non-neural ectoderm;Xt_Spemann organizer
Dr_LOC103909095;Xt_Xetrov90001667m	Dr_LOC103909095;Xt_znf281	0	0.441323	0.441323	Eukaryota	Dr_Blastula;Dr_Dorsal organizer;Dr_Involuting marginal zone;Dr_Neuroectoderm	Xt_Blastula;Xt_Involuting marginal zone;Xt_Neuroectoderm;Xt_Non-neural ectoderm;Xt_Spemann organizer
Dr_LOC103909095;Xt_LOC101735121-like	Dr_LOC103909095;Xt_znf281	0	0.441323	0.441323	Eukaryota	Dr_Blastula;Dr_Dorsal organizer;Dr_Involuting marginal zone;Dr_Neuroectoderm	Xt_Blastula;Xt_Involuting marginal zone;Xt_Neuroectoderm;Xt_Non-neural ectoderm;Xt_Spemann organizer
Dr_LOC103909095;Xt_znf383	Dr_LOC103909095;Xt_znf281	0	0.441323	0.441323	Eukaryota	Dr_Blastula;Dr_Dorsal organizer;Dr_Involuting marginal zone;Dr_Neuroectoderm	Xt_Blastula;Xt_Involuting marginal zone;Xt_Neuroectoderm;Xt_Non-neural ectoderm;Xt_Spemann organizer
Xt_znf281;Dr_LOC100005963	Xt_znf281;Dr_LOC103909095	0	0.441323	0.441323	Eukaryota	Dr_Blastula;Dr_Dorsal organizer;Dr_Involuting marginal zone;Dr_Neuroectoderm	Xt_Blastula;Xt_Involuting marginal zone;Xt_Neuroectoderm;Xt_Non-neural ectoderm;Xt_Spemann organizer
Dr_LOC103909095;Xt_LOC100496403-like	Dr_LOC103909095;Xt_znf281	0	0.441323	0.441323	Eukaryota	Dr_Blastula;Dr_Dorsal organizer;Dr_Involuting marginal zone;Dr_Neuroectoderm	Xt_Blastula;Xt_Involuting marginal zone;Xt_Neuroectoderm;Xt_Non-neural ectoderm;Xt_Spemann organizer
Dr_LOC103909095;Xt_Xetrov90008367m	Dr_LOC103909095;Xt_znf281	0	0.441323	0.441323	Eukaryota	Dr_Blastula;Dr_Dorsal organizer;Dr_Involuting marginal zone;Dr_Neuroectoderm	Xt_Blastula;Xt_Involuting marginal zone;Xt_Neuroectoderm;Xt_Non-neural ectoderm;Xt_Spemann organizer
Dr_LOC103909095;Xt_LOC100495499	Dr_LOC103909095;Xt_znf281	0	0.441323	0.441323	Eukaryota	Dr_Blastula;Dr_Dorsal organizer;Dr_Involuting marginal zone;Dr_Neuroectoderm	Xt_Blastula;Xt_Involuting marginal zone;Xt_Neuroectoderm;Xt_Non-neural ectoderm;Xt_Spemann organizer
Dr_LOC103909095;Xt_LOC100497179-like	Dr_LOC103909095;Xt_znf281	0	0.441323	0.441323	Eukaryota	Dr_Blastula;Dr_Dorsal organizer;Dr_Involuting marginal zone;Dr_Neuroectoderm	Xt_Blastula;Xt_Involuting marginal zone;Xt_Neuroectoderm;Xt_Non-neural ectoderm;Xt_Spemann organizer
Dr_LOC103909095;Xt_znf329	Dr_LOC103909095;Xt_znf281	0	0.441323	0.441323	Eukaryota	Dr_Blastula;Dr_Dorsal organizer;Dr_Involuting marginal zone;Dr_Neuroectoderm	Xt_Blastula;Xt_Involuting marginal zone;Xt_Neuroectoderm;Xt_Non-neural ectoderm;Xt_Spemann organizer
Dr_LOC103909095;Xt_Xetrov90029323m	Dr_LOC103909095;Xt_znf281	0	0.441323	0.441323	Eukaryota	Dr_Blastula;Dr_Dorsal organizer;Dr_Involuting marginal zone;Dr_Neuroectoderm	Xt_Blastula;Xt_Involuting marginal zone;Xt_Neuroectoderm;Xt_Non-neural ectoderm;Xt_Spemann organizer
Dr_LOC103909095;Xt_LOC100496561	Dr_LOC103909095;Xt_znf281	0	0.441323	0.441323	Eukaryota	Dr_Blastula;Dr_Dorsal organizer;Dr_Involuting marginal zone;Dr_Neuroectoderm	Xt_Blastula;Xt_Involuting marginal zone;Xt_Neuroectoderm;Xt_Non-neural ectoderm;Xt_Spemann organizer
Dr_LOC103909095;Xt_Xetrov90015419m	Dr_LOC103909095;Xt_znf281	0	0.441323	0.441323	Eukaryota	Dr_Blastula;Dr_Dorsal organizer;Dr_Involuting marginal zone;Dr_Neuroectoderm	Xt_Blastula;Xt_Involuting marginal zone;Xt_Neuroectoderm;Xt_Non-neural ectoderm;Xt_Spemann organizer
Dr_LOC103909095;Xt_Xetrov90015421m	Dr_LOC103909095;Xt_znf281	0	0.441323	0.441323	Eukaryota	Dr_Blastula;Dr_Dorsal organizer;Dr_Involuting marginal zone;Dr_Neuroectoderm	Xt_Blastula;Xt_Involuting marginal zone;Xt_Neuroectoderm;Xt_Non-neural ectoderm;Xt_Spemann organizer
Xt_myh8-like;Dr_LOC100537594	Xt_myh8-like;Dr_myhz1.1	0	0.44098	0.44098	Eukaryota
Xt_myh8-like;Dr_wu:fd14a01	Xt_myh8-like;Dr_myhz1.1	0	0.44098	0.44098	Eukaryota
Xt_myh8-like;Dr_zgc:66156	Xt_myh8-like;Dr_myhz1.1	0	0.44098	0.44098	Eukaryota
Xt_myh8-like;Dr_myhb	Xt_myh8-like;Dr_myhz1.1	0	0.44098	0.44098	Eukaryota
Dr_zgc:174275;Xt_znf383	Dr_zgc:174275;Xt_znf281	0.0930339	0.533807	0.440773	Eukaryota	Dr_Blastula;Dr_Involuting marginal zone;Dr_Neuroectoderm;Dr_Non-neural ectoderm	Xt_Blastula;Xt_Involuting marginal zone;Xt_Neuroectoderm;Xt_Non-neural ectoderm
Dr_LOC100334599;Xt_hba2	Dr_LOC100334599;Xt_LOC100037901	0.219352	0.659554	0.440202	Eukaryota	Dr_Blood	Xt_Blood
Dr_rnf185;Xt_Xetrov90002881m	Dr_rnf185;Xt_rnf5	0.00241528	0.442384	0.439969	Eukaryota	Dr_Blastula;Dr_Involuting marginal zone;Dr_Neuroectoderm	Xt_Blastula;Xt_Involuting marginal zone;Xt_Neuroectoderm
Dr_zgc:173619;Xt_LOC100495499	Dr_zgc:173619;Xt_sp3	0.00571592	0.445146	0.43943	Eukaryota	Dr_Involuting marginal zone;Dr_Neuroectoderm;Dr_Non-neural ectoderm	Xt_Involuting marginal zone;Xt_Neuroectoderm;Xt_Non-neural ectoderm
Dr_gb:am422109;Xt_znf250	Dr_gb:am422109;Xt_bcl6	0	0.439111	0.439111	Eukaryota	Dr_Blastula	Xt_Blastula
Dr_gb:am422109;Xt_LOC100496561	Dr_gb:am422109;Xt_bcl6	0	0.439111	0.439111	Eukaryota	Dr_Blastula	Xt_Blastula
Xt_bcl6;Dr_bcl6a	Xt_bcl6;Dr_gb:am422109	0	0.439111	0.439111	Eukaryota	Dr_Blastula	Xt_Blastula
Dr_gb:am422109;Xt_LOC100493966	Dr_gb:am422109;Xt_bcl6	0	0.439111	0.439111	Eukaryota	Dr_Blastula	Xt_Blastula
Dr_gb:am422109;Xt_Xetrov90001667m	Dr_gb:am422109;Xt_bcl6	0	0.439111	0.439111	Eukaryota	Dr_Blastula	Xt_Blastula
Dr_gb:am422109;Xt_LOC101734394	Dr_gb:am422109;Xt_bcl6	0	0.439111	0.439111	Eukaryota	Dr_Blastula	Xt_Blastula
Dr_gb:am422109;Xt_LOC101735121-like	Dr_gb:am422109;Xt_bcl6	0	0.439111	0.439111	Eukaryota	Dr_Blastula	Xt_Blastula
Dr_gb:am422109;Xt_znf329	Dr_gb:am422109;Xt_bcl6	0	0.439111	0.439111	Eukaryota	Dr_Blastula	Xt_Blastula
Xt_sox17b.1;Dr_sox17	Xt_sox17b.1;Dr_sox32	0.0390975	0.478014	0.438917	Eukaryota	Dr_Endoderm	Xt_Endoderm
Xt_ventx2.1;Dr_vent	Xt_ventx2.1;Dr_ved	0	0.43855	0.43855	Eukaryota	Dr_Endoderm;Dr_Involuting marginal zone;Dr_Non-neural ectoderm;Dr_Presomitic mesoderm	Xt_Endoderm;Xt_Involuting marginal zone;Xt_Non-neural ectoderm;Xt_Presomitic mesoderm;Xt_Tailbud
Xt_hoxa11;Dr_hoxa11b	Xt_hoxa11;Dr_hoxb9a	0	0.438349	0.438349	Eukaryota	Dr_Presomitic mesoderm	Xt_Presomitic mesoderm
Xt_hba-l5;Dr_si:xx-by187g17.1	Xt_hba-l5;Dr_si:ch211-5k11.12	0.405273	0.843407	0.438134	Eukaryota	Dr_Blood	Xt_Blood
Dr_LOC103910469;Xt_Xetrov90015421m	Dr_LOC103910469;Xt_bcl6	0.0500195	0.487935	0.437916	Eukaryota	Dr_Blastula	Xt_Blastula
Dr_hoxd9a;Xt_hoxd9	Dr_hoxd9a;Xt_hoxc10	0	0.437003	0.437003	Eukaryota	Dr_Presomitic mesoderm;Dr_Tailbud	Xt_Presomitic mesoderm;Xt_Skeletal muscle;Xt_Tailbud
Xt_hnrnpa2b1;Dr_hnrnpa3	Xt_hnrnpa2b1;Dr_hnrpdl	0	0.436647	0.436647	Eukaryota
Xt_hnrnpa2b1;Dr_hnrnpa1b	Xt_hnrnpa2b1;Dr_hnrpdl	0	0.436647	0.436647	Eukaryota
Dr_znf1137;Xt_LOC100496561	Dr_znf1137;Xt_sp1	0.00565628	0.441441	0.435784	Eukaryota
Xt_zbtb10;Dr_zbtb10	Xt_zbtb10;Dr_si:ch211-241b2.1	0.0152839	0.450998	0.435714	Eukaryota
Dr_zgc:174275;Xt_znf329	Dr_zgc:174275;Xt_sp5l	0	0.435584	0.435584	Eukaryota	Dr_Blastula;Dr_Involuting marginal zone;Dr_Neuroectoderm	Xt_Blastula;Xt_Involuting marginal zone;Xt_Neuroectoderm
Dr_zgc:174275;Xt_LOC100493966	Dr_zgc:174275;Xt_sp5l	0	0.435584	0.435584	Eukaryota	Dr_Blastula;Dr_Involuting marginal zone;Dr_Neuroectoderm	Xt_Blastula;Xt_Involuting marginal zone;Xt_Neuroectoderm
Xt_hba4;Dr_hbaa1	Xt_hba4;Dr_hbbe3	0.0692819	0.504607	0.435325	Eukaryota
Dr_zgc:174275;Xt_LOC101735121-like	Dr_zgc:174275;Xt_sp5l	0.000658014	0.435584	0.434926	Eukaryota	Dr_Blastula;Dr_Involuting marginal zone;Dr_Neuroectoderm	Xt_Blastula;Xt_Involuting marginal zone;Xt_Neuroectoderm
Dr_her4.3;Xt_hes8	Dr_her4.3;Xt_hes6.2	0	0.434548	0.434548	Eukaryota	Dr_Forebrain/midbrain	Xt_Forebrain/midbrain
Xt_hes6.2;Dr_her8.2	Xt_hes6.2;Dr_her4.3	0	0.434548	0.434548	Eukaryota	Dr_Forebrain/midbrain	Xt_Forebrain/midbrain
Dr_pkp4;Xt_pkp4-like.1	Dr_pkp4;Xt_ctnnd1	0	0.434259	0.434259	Eukaryota	Dr_Dorsal organizer;Dr_Endoderm;Dr_Epidermal progenitor;Dr_Involuting marginal zone;Dr_Neuroectoderm;Dr_Non-neural ectoderm;Dr_Placodal area	Xt_Endoderm;Xt_Epidermal progenitor;Xt_Involuting marginal zone;Xt_Neuroectoderm;Xt_Non-neural ectoderm;Xt_Spemann organizer
Dr_dmrt3a;Xt_dmrt3	Dr_dmrt3a;Xt_dmrta2	0	0.434069	0.434069	Eukaryota
Dr_ltbp3;Xt_ltbp3	Dr_ltbp3;Xt_matn2	0	0.4337	0.4337	Eukaryota
Xt_matn2;Dr_matn4	Xt_matn2;Dr_ltbp3	0	0.4337	0.4337	Eukaryota
Dr_trim63b;Xt_trim63	Dr_trim63b;Xt_trim72	0.202904	0.635954	0.43305	Eukaryota	Dr_Skeletal muscle	Xt_Skeletal muscle
Xt_col5a1-like;Dr_col5a1	Xt_col5a1-like;Dr_col5a3a	0.224044	0.656848	0.432805	Eukaryota	Dr_Notochord	Xt_Notochord
Xt_hba-l5;Dr_si:xx-by187g17.1	Xt_hba-l5;Dr_hbbe3	0.405273	0.837907	0.432634	Eukaryota	Dr_Blood	Xt_Blood
Dr_zgc:174275;Xt_Xetrov90015419m	Dr_zgc:174275;Xt_znf281	0.10176	0.533807	0.432047	Eukaryota	Dr_Blastula;Dr_Involuting marginal zone;Dr_Neuroectoderm;Dr_Non-neural ectoderm	Xt_Blastula;Xt_Involuting marginal zone;Xt_Neuroectoderm;Xt_Non-neural ectoderm
Dr_dlx4b;Xt_dlx4	Dr_dlx4b;Xt_dlx2	0	0.431435	0.431435	Eukaryota	Dr_Otic placode	Xt_Otic placode
Xt_hbz;Dr_si:xx-by187g17.1	Xt_hbz;Dr_hbbe2	0.353392	0.784656	0.431264	Eukaryota	Dr_Blood	Xt_Blood
Dr_znf1137;Xt_LOC101735121-like	Dr_znf1137;Xt_sp1	0.0108699	0.441441	0.430571	Eukaryota
Xt_crx;Dr_otx5	Xt_crx;Dr_otx1a	0	0.430413	0.430413	Eukaryota	Dr_Dorsal organizer;Dr_Endoderm;Dr_Neuroectoderm	Xt_Endoderm;Xt_Neuroectoderm;Xt_Non-neural ectoderm;Xt_Spemann organizer
Xt_hba-l2;Dr_si:xx-by187g17.1	Xt_hba-l2;Dr_MGC173646	0.25417	0.684031	0.42986	Eukaryota	Dr_Blood	Xt_Blood
Dr_zgc:174624;Xt_znf383	Dr_zgc:174624;Xt_znf281	0.0746702	0.504249	0.429579	Eukaryota	Dr_Blastula;Dr_Involuting marginal zone;Dr_Neuroectoderm;Dr_Non-neural ectoderm	Xt_Blastula;Xt_Involuting marginal zone;Xt_Neuroectoderm;Xt_Non-neural ectoderm
Dr_sumo3b;Xt_sumo2	Dr_sumo3b;Xt_sumo1	0.0324746	0.461691	0.429217	Eukaryota	Dr_Dorsal organizer;Dr_Endoderm;Dr_Intermediate mesoderm;Dr_Involuting marginal zone;Dr_Neuroectoderm;Dr_Non-neural ectoderm;Dr_Tailbud	Xt_Endoderm;Xt_Hindbrain;Xt_Involuting marginal zone;Xt_Neuroectoderm;Xt_Non-neural ectoderm;Xt_Spemann organizer;Xt_Tailbud
Xt_hbz;Dr_si:xx-by187g17.1	Xt_hbz;Dr_hbbe1.1	0.353392	0.782569	0.429177	Eukaryota	Dr_Blood	Xt_Blood
Xt_LOC100486063;Dr_col6a6	Xt_LOC100486063;Dr_si:dkey-117n7.5	0	0.429069	0.429069	Eukaryota	Dr_Epidermal progenitor	Xt_Epidermal progenitor
Xt_LOC100486063;Dr_LOC100535278	Xt_LOC100486063;Dr_si:dkey-117n7.5	0	0.429069	0.429069	Eukaryota	Dr_Epidermal progenitor	Xt_Epidermal progenitor
Dr_cmlc1;Xt_myl3	Dr_cmlc1;Xt_myl1	0	0.428852	0.428852	Eukaryota	Dr_Skeletal muscle	Xt_Skeletal muscle
Xt_hba-l5;Dr_si:xx-by187g17.1	Xt_hba-l5;Dr_hbbe2	0.405273	0.833071	0.427798	Eukaryota	Dr_Blood	Xt_Blood
Xt_gata4;Dr_gata4	Xt_gata4;Dr_gata5	0	0.427304	0.427304	Eukaryota	Dr_Dorsal organizer;Dr_Endoderm;Dr_Intermediate mesoderm;Dr_Involuting marginal zone	Xt_Endoderm;Xt_Involuting marginal zone;Xt_Spemann organizer
Dr_zgc:174624;Xt_Xetrov90029323m	Dr_zgc:174624;Xt_znf281	0.0780955	0.504249	0.426154	Eukaryota	Dr_Blastula;Dr_Involuting marginal zone;Dr_Neuroectoderm;Dr_Non-neural ectoderm	Xt_Blastula;Xt_Involuting marginal zone;Xt_Neuroectoderm;Xt_Non-neural ectoderm
Dr_znf1137;Xt_Xetrov90001667m	Dr_znf1137;Xt_sp1	0.0158436	0.441441	0.425597	Eukaryota
Dr_fev;Xt_fev	Dr_fev;Xt_gabpa	0.0325775	0.458083	0.425506	Eukaryota	Dr_Blastula;Dr_Dorsal organizer;Dr_Involuting marginal zone;Dr_Neuroectoderm;Dr_Non-neural ectoderm;Dr_Notochord	Xt_Blastula;Xt_Involuting marginal zone;Xt_Neuroectoderm;Xt_Non-neural ectoderm;Xt_Spemann organizer
Dr_rasl11b;Xt_rasl11b	Dr_rasl11b;Xt_rhebl1	0	0.425171	0.425171	Eukaryota	Dr_Involuting marginal zone;Dr_Neuroectoderm;Dr_Non-neural ectoderm	Xt_Involuting marginal zone;Xt_Neuroectoderm;Xt_Non-neural ectoderm
Dr_nkx2.2b;Xt_nkx2-2	Dr_nkx2.2b;Xt_nkx2-1	0.326025	0.751075	0.42505	Eukaryota	Dr_Forebrain/midbrain	Xt_Forebrain/midbrain
Xt_znf281;Dr_LOC100005963	Xt_znf281;Dr_zgc:113886	0	0.424943	0.424943	Eukaryota	Dr_Blastula	Xt_Blastula
Dr_zgc:113886;Xt_Xetrov90015421m	Dr_zgc:113886;Xt_znf281	0	0.424943	0.424943	Eukaryota	Dr_Blastula	Xt_Blastula
Dr_zgc:113886;Xt_Xetrov90001667m	Dr_zgc:113886;Xt_znf281	0	0.424943	0.424943	Eukaryota	Dr_Blastula	Xt_Blastula
Dr_zgc:113886;Xt_znf329	Dr_zgc:113886;Xt_znf281	0	0.424943	0.424943	Eukaryota	Dr_Blastula	Xt_Blastula
Dr_zgc:113886;Xt_Xetrov90008367m	Dr_zgc:113886;Xt_znf281	0	0.424943	0.424943	Eukaryota	Dr_Blastula	Xt_Blastula
Dr_zgc:113886;Xt_Xetrov90029323m	Dr_zgc:113886;Xt_znf281	0	0.424943	0.424943	Eukaryota	Dr_Blastula	Xt_Blastula
Dr_zgc:113886;Xt_LOC100493966	Dr_zgc:113886;Xt_znf281	0	0.424943	0.424943	Eukaryota	Dr_Blastula	Xt_Blastula
Dr_zgc:113886;Xt_LOC101735121-like	Dr_zgc:113886;Xt_znf281	0	0.424943	0.424943	Eukaryota	Dr_Blastula	Xt_Blastula
Dr_zgc:113886;Xt_znf383	Dr_zgc:113886;Xt_znf281	0	0.424943	0.424943	Eukaryota	Dr_Blastula	Xt_Blastula
Dr_zgc:113886;Xt_znf250	Dr_zgc:113886;Xt_znf281	0	0.424943	0.424943	Eukaryota	Dr_Blastula	Xt_Blastula
Dr_zgc:113886;Xt_LOC100496403-like	Dr_zgc:113886;Xt_znf281	0	0.424943	0.424943	Eukaryota	Dr_Blastula	Xt_Blastula
Dr_zgc:113886;Xt_LOC100496561	Dr_zgc:113886;Xt_znf281	0	0.424943	0.424943	Eukaryota	Dr_Blastula	Xt_Blastula
Dr_zgc:113886;Xt_LOC101734394	Dr_zgc:113886;Xt_znf281	0	0.424943	0.424943	Eukaryota	Dr_Blastula	Xt_Blastula
Xt_hba4;Dr_hbaa1	Xt_hba4;Dr_MGC173646	0.0692819	0.493758	0.424476	Eukaryota
Xt_taf15;Dr_taf15	Xt_taf15;Dr_ewsr1b	0	0.424242	0.424242	Eukaryota	Dr_Involuting marginal zone;Dr_Neuroectoderm;Dr_Non-neural ectoderm;Dr_Presomitic mesoderm;Dr_Tailbud	Xt_Hindbrain;Xt_Involuting marginal zone;Xt_Neuroectoderm;Xt_Non-neural ectoderm;Xt_Tailbud
Dr_zgc:174275;Xt_LOC100496561	Dr_zgc:174275;Xt_sp5l	0.0119995	0.435584	0.423585	Eukaryota	Dr_Blastula;Dr_Involuting marginal zone;Dr_Neuroectoderm	Xt_Blastula;Xt_Involuting marginal zone;Xt_Neuroectoderm
Dr_hbae3;Xt_hba2	Dr_hbae3;Xt_LOC100216007	0.213042	0.635942	0.422899	Eukaryota	Dr_Blood	Xt_Blood
Dr_zgc:174275;Xt_LOC100497179-like	Dr_zgc:174275;Xt_znf281	0.110944	0.533807	0.422862	Eukaryota	Dr_Blastula;Dr_Involuting marginal zone;Dr_Neuroectoderm;Dr_Non-neural ectoderm	Xt_Blastula;Xt_Involuting marginal zone;Xt_Neuroectoderm;Xt_Non-neural ectoderm
Dr_zgc:173619;Xt_znf383	Dr_zgc:173619;Xt_sp3	0.022655	0.445146	0.422491	Eukaryota	Dr_Involuting marginal zone;Dr_Neuroectoderm;Dr_Non-neural ectoderm	Xt_Involuting marginal zone;Xt_Neuroectoderm;Xt_Non-neural ectoderm
Dr_fkbp11;Xt_fkbp11	Dr_fkbp11;Xt_fkbp10	0	0.42248	0.42248	Eukaryota	Dr_Epidermal progenitor;Dr_Intermediate mesoderm;Dr_Notochord	Xt_Endothelial;Xt_Epidermal progenitor;Xt_Intermediate mesoderm;Xt_Notochord
Xt_fkbp10;Dr_fkbp10a	Xt_fkbp10;Dr_fkbp11	0	0.42248	0.42248	Eukaryota	Dr_Epidermal progenitor;Dr_Intermediate mesoderm;Dr_Notochord	Xt_Endothelial;Xt_Epidermal progenitor;Xt_Intermediate mesoderm;Xt_Notochord
Dr_hbae3;Xt_hba2	Dr_hbae3;Xt_LOC100037901	0.213042	0.635339	0.422296	Eukaryota	Dr_Blood	Xt_Blood
Dr_zgc:174275;Xt_Xetrov90001667m	Dr_zgc:174275;Xt_sp5l	0.0136898	0.435584	0.421895	Eukaryota	Dr_Blastula;Dr_Involuting marginal zone;Dr_Neuroectoderm	Xt_Blastula;Xt_Involuting marginal zone;Xt_Neuroectoderm
Dr_znf1137;Xt_znf250	Dr_znf1137;Xt_sp5l	0	0.420722	0.420722	Eukaryota	Dr_Blastula;Dr_Involuting marginal zone;Dr_Neuroectoderm	Xt_Blastula;Xt_Involuting marginal zone;Xt_Neuroectoderm
Dr_znf1137;Xt_LOC100493966	Dr_znf1137;Xt_sp5l	0	0.420722	0.420722	Eukaryota	Dr_Blastula;Dr_Involuting marginal zone;Dr_Neuroectoderm	Xt_Blastula;Xt_Involuting marginal zone;Xt_Neuroectoderm
Dr_znf1137;Xt_znf329	Dr_znf1137;Xt_sp5l	0	0.420722	0.420722	Eukaryota	Dr_Blastula;Dr_Involuting marginal zone;Dr_Neuroectoderm	Xt_Blastula;Xt_Involuting marginal zone;Xt_Neuroectoderm
Dr_zgc:174624;Xt_Xetrov90008367m	Dr_zgc:174624;Xt_znf281	0.0836861	0.504249	0.420563	Eukaryota	Dr_Blastula;Dr_Involuting marginal zone;Dr_Neuroectoderm;Dr_Non-neural ectoderm	Xt_Blastula;Xt_Involuting marginal zone;Xt_Neuroectoderm;Xt_Non-neural ectoderm
Xt_nme7;Dr_nme7	Xt_nme7;Dr_nme5	0.143495	0.563814	0.420319	Eukaryota
Dr_foxi1;Xt_foxi2	Dr_foxi1;Xt_foxi4.2	0	0.419836	0.419836	Eukaryota	Dr_Non-neural ectoderm;Dr_Placodal area	Xt_Non-neural ectoderm;Xt_Placodal area
Dr_rheb;Xt_rheb	Dr_rheb;Xt_rhebl1	0	0.419698	0.419698	Eukaryota	Dr_Involuting marginal zone;Dr_Neuroectoderm;Dr_Non-neural ectoderm	Xt_Involuting marginal zone;Xt_Neuroectoderm;Xt_Non-neural ectoderm
Xt_hba-l2;Dr_si:xx-by187g17.1	Xt_hba-l2;Dr_hbbe1.1	0.25417	0.673547	0.419377	Eukaryota	Dr_Blood	Xt_Blood
Xt_vezf1;Dr_vezf1a	Xt_vezf1;Dr_si:ch211-198a12.6	0.0320253	0.451069	0.419043	Eukaryota	Dr_Involuting marginal zone;Dr_Neuroectoderm;Dr_Non-neural ectoderm	Xt_Involuting marginal zone;Xt_Neuroectoderm;Xt_Non-neural ectoderm
Xt_hba-l2;Dr_hbaa1	Xt_hba-l2;Dr_zgc:163057	0.145475	0.563567	0.418091	Eukaryota	Dr_Blood	Xt_Blood
Xt_nkx2-1;Dr_nkx2.1	Xt_nkx2-1;Dr_nkx2.2b	0.333604	0.751075	0.417471	Eukaryota	Dr_Forebrain/midbrain	Xt_Forebrain/midbrain
Xt_hba4;Dr_hbaa1	Xt_hba4;Dr_hbbe1.1	0.0692819	0.486727	0.417445	Eukaryota
Dr_znf1137;Xt_Xetrov90015419m	Dr_znf1137;Xt_znf281	0.127324	0.544638	0.417313	Eukaryota	Dr_Blastula;Dr_Involuting marginal zone;Dr_Neuroectoderm;Dr_Non-neural ectoderm	Xt_Blastula;Xt_Involuting marginal zone;Xt_Neuroectoderm;Xt_Non-neural ectoderm
Xt_vezf1;Dr_vezf1a	Xt_vezf1;Dr_LOC570015	0.0320253	0.44885	0.416825	Eukaryota	Dr_Dorsal organizer;Dr_Involuting marginal zone;Dr_Neuroectoderm;Dr_Non-neural ectoderm;Dr_Notochord;Dr_Tailbud	Xt_Involuting marginal zone;Xt_Neuroectoderm;Xt_Non-neural ectoderm;Xt_Spemann organizer;Xt_Tailbud
Xt_foxi2;Dr_foxi1	Xt_foxi2;Dr_foxn2b	0	0.416811	0.416811	Eukaryota	Dr_Blastula	Xt_Blastula
Dr_fkbp11;Xt_fkbp11	Dr_fkbp11;Xt_fkbp9	0	0.415869	0.415869	Eukaryota	Dr_Epidermal progenitor;Dr_Intermediate mesoderm;Dr_Notochord	Xt_Endothelial;Xt_Epidermal progenitor;Xt_Intermediate mesoderm;Xt_Notochord;Xt_Spemann organizer
Dr_hoxa10b;Xt_hoxa10	Dr_hoxa10b;Xt_hoxd10	0.183478	0.598946	0.415468	Eukaryota	Dr_Presomitic mesoderm;Dr_Tailbud	Xt_Presomitic mesoderm;Xt_Tailbud
Dr_hoxd13a;Xt_hoxd13	Dr_hoxd13a;Xt_hoxc11	0	0.415194	0.415194	Eukaryota	Dr_Presomitic mesoderm	Xt_Presomitic mesoderm;Xt_Tailbud
Dr_znf1137;Xt_LOC100496561	Dr_znf1137;Xt_sp5l	0.00565628	0.420722	0.415066	Eukaryota	Dr_Blastula;Dr_Involuting marginal zone;Dr_Neuroectoderm	Xt_Blastula;Xt_Involuting marginal zone;Xt_Neuroectoderm
Dr_znf1137;Xt_LOC101734394	Dr_znf1137;Xt_sp1	0.0267137	0.441441	0.414727	Eukaryota
Dr_zgc:174624;Xt_Xetrov90015419m	Dr_zgc:174624;Xt_znf281	0.0900177	0.504249	0.414231	Eukaryota	Dr_Blastula;Dr_Involuting marginal zone;Dr_Neuroectoderm;Dr_Non-neural ectoderm	Xt_Blastula;Xt_Involuting marginal zone;Xt_Neuroectoderm;Xt_Non-neural ectoderm
Dr_hoxb9a;Xt_hoxb9	Dr_hoxb9a;Xt_hoxd11	0.0703406	0.484177	0.413836	Eukaryota	Dr_Presomitic mesoderm;Dr_Tailbud	Xt_Presomitic mesoderm;Xt_Tailbud
Xt_znf281;Dr_LOC100005963	Xt_znf281;Dr_LOC103908671	0	0.41383	0.41383	Eukaryota	Dr_Blastula	Xt_Blastula
Dr_znf1137;Xt_LOC100497179-like	Dr_znf1137;Xt_znf281	0.130994	0.544638	0.413643	Eukaryota	Dr_Blastula;Dr_Involuting marginal zone;Dr_Neuroectoderm;Dr_Non-neural ectoderm	Xt_Blastula;Xt_Involuting marginal zone;Xt_Neuroectoderm;Xt_Non-neural ectoderm
Dr_erg;Xt_erg	Dr_erg;Xt_elk3	0.0429576	0.456597	0.413639	Eukaryota
Xt_znf281;Dr_LOC100005963	Xt_znf281;Dr_zgc:100951	0	0.413333	0.413333	Eukaryota	Dr_Blastula	Xt_Blastula
Dr_zgc:174275;Xt_LOC100493966	Dr_zgc:174275;Xt_sp1	0	0.413265	0.413265	Eukaryota
Dr_zgc:174275;Xt_znf329	Dr_zgc:174275;Xt_sp1	0	0.413265	0.413265	Eukaryota
Xt_h3f3b;Dr_h3f3a	Xt_h3f3b;Dr_cenpa	0	0.412679	0.412679	Eukaryota	Dr_Eye primordium;Dr_Forebrain/midbrain;Dr_Hindbrain;Dr_Intermediate mesoderm;Dr_Neural crest;Dr_Optic;Dr_Presomitic mesoderm;Dr_Tailbud	Xt_Endothelial;Xt_Eye primordium;Xt_Forebrain/midbrain;Xt_Hindbrain;Xt_Intermediate mesoderm;Xt_Neural crest;Xt_Optic;Xt_Skeletal muscle
Xt_h3f3b;Dr_h3f3d	Xt_h3f3b;Dr_cenpa	0	0.412679	0.412679	Eukaryota	Dr_Eye primordium;Dr_Forebrain/midbrain;Dr_Hindbrain;Dr_Intermediate mesoderm;Dr_Neural crest;Dr_Optic;Dr_Presomitic mesoderm;Dr_Tailbud	Xt_Endothelial;Xt_Eye primordium;Xt_Forebrain/midbrain;Xt_Hindbrain;Xt_Intermediate mesoderm;Xt_Neural crest;Xt_Optic;Xt_Skeletal muscle
Dr_cenpa;Xt_cenpa	Dr_cenpa;Xt_h3f3b	0	0.412679	0.412679	Eukaryota	Dr_Eye primordium;Dr_Forebrain/midbrain;Dr_Hindbrain;Dr_Intermediate mesoderm;Dr_Neural crest;Dr_Optic;Dr_Presomitic mesoderm;Dr_Tailbud	Xt_Endothelial;Xt_Eye primordium;Xt_Forebrain/midbrain;Xt_Hindbrain;Xt_Intermediate mesoderm;Xt_Neural crest;Xt_Optic;Xt_Skeletal muscle
Dr_zgc:174275;Xt_LOC101735121-like	Dr_zgc:174275;Xt_sp1	0.000658014	0.413265	0.412607	Eukaryota
Dr_LOC103910469;Xt_LOC100495499	Dr_LOC103910469;Xt_bcl6	0.0753864	0.487935	0.412549	Eukaryota	Dr_Blastula	Xt_Blastula
Dr_hbz;Xt_hba2	Dr_hbz;Xt_hbd	0	0.412372	0.412372	Eukaryota	Dr_Blood	Xt_Blood
Dr_hbz;Xt_hba-l3	Dr_hbz;Xt_hbd	0	0.412372	0.412372	Eukaryota	Dr_Blood	Xt_Blood
Dr_zgc:174275;Xt_LOC101734394	Dr_zgc:174275;Xt_sp5l	0.0234848	0.435584	0.4121	Eukaryota	Dr_Blastula;Dr_Involuting marginal zone;Dr_Neuroectoderm	Xt_Blastula;Xt_Involuting marginal zone;Xt_Neuroectoderm
Dr_si:ch211-132b12.8;Xt_cntd2	Dr_si:ch211-132b12.8;Xt_ccnb1	0.336913	0.748899	0.411986	Eukaryota	Dr_Blastula	Xt_Blastula
Dr_zgc:174624;Xt_znf250	Dr_zgc:174624;Xt_znf281	0.0928963	0.504249	0.411353	Eukaryota	Dr_Blastula;Dr_Involuting marginal zone;Dr_Neuroectoderm;Dr_Non-neural ectoderm	Xt_Blastula;Xt_Involuting marginal zone;Xt_Neuroectoderm;Xt_Non-neural ectoderm
Dr_zgc:174275;Xt_LOC100496403-like	Dr_zgc:174275;Xt_sp5l	0.0243658	0.435584	0.411219	Eukaryota	Dr_Blastula;Dr_Involuting marginal zone;Dr_Neuroectoderm	Xt_Blastula;Xt_Involuting marginal zone;Xt_Neuroectoderm
Xt_lamp1;Dr_zgc:64072	Xt_lamp1;Dr_lamp2	0.170279	0.581469	0.41119	Eukaryota	Dr_Blastula;Dr_Dorsal organizer;Dr_Involuting marginal zone;Dr_Neuroectoderm;Dr_Notochord	Xt_Blastula;Xt_Involuting marginal zone;Xt_Neuroectoderm;Xt_Non-neural ectoderm;Xt_Notochord;Xt_Spemann organizer
Xt_tox2;Dr_tox2	Xt_tox2;Dr_tox	0.133864	0.544291	0.410427	Eukaryota	Dr_Eye primordium;Dr_Forebrain/midbrain;Dr_Hindbrain;Dr_Neuron;Dr_Optic;Dr_Tailbud	Xt_Eye primordium;Xt_Forebrain/midbrain;Xt_Hindbrain;Xt_Neuron;Xt_Optic
Dr_si:ch211-5k11.2;Xt_hba2	Dr_si:ch211-5k11.2;Xt_LOC100145107	0.213684	0.623609	0.409925	Eukaryota	Dr_Blood	Xt_Blood
Dr_si:ch211-5k11.2;Xt_hba2	Dr_si:ch211-5k11.2;Xt_LOC101735171	0.213684	0.623607	0.409923	Eukaryota	Dr_Blood	Xt_Blood
Dr_znf1137;Xt_LOC101735121-like	Dr_znf1137;Xt_sp5l	0.0108699	0.420722	0.409852	Eukaryota	Dr_Blastula;Dr_Involuting marginal zone;Dr_Neuroectoderm	Xt_Blastula;Xt_Involuting marginal zone;Xt_Neuroectoderm
Xt_hoxa11;Dr_hoxa11b	Xt_hoxa11;Dr_hoxa10b	0	0.409658	0.409658	Eukaryota	Dr_Presomitic mesoderm	Xt_Presomitic mesoderm
Dr_znf1137;Xt_LOC100496403-like	Dr_znf1137;Xt_sp1	0.0324707	0.441441	0.40897	Eukaryota
Dr_rap1aa;Xt_rap1b	Dr_rap1aa;Xt_ralb	0.0203458	0.429049	0.408703	Eukaryota	Dr_Dorsal organizer;Dr_Endoderm;Dr_Involuting marginal zone;Dr_Neuroectoderm;Dr_Non-neural ectoderm;Dr_Notochord	Xt_Endoderm;Xt_Involuting marginal zone;Xt_Neuroectoderm;Xt_Non-neural ectoderm;Xt_Small secretory cells;Xt_Spemann organizer
Dr_si:dkey-57k17.1;Xt_znf329	Dr_si:dkey-57k17.1;Xt_znf281	0	0.408622	0.408622	Eukaryota	Dr_Involuting marginal zone;Dr_Neuroectoderm;Dr_Non-neural ectoderm	Xt_Involuting marginal zone;Xt_Neuroectoderm;Xt_Non-neural ectoderm
Dr_si:dkey-57k17.1;Xt_LOC100493966	Dr_si:dkey-57k17.1;Xt_znf281	0	0.408622	0.408622	Eukaryota	Dr_Involuting marginal zone;Dr_Neuroectoderm;Dr_Non-neural ectoderm	Xt_Involuting marginal zone;Xt_Neuroectoderm;Xt_Non-neural ectoderm
Dr_si:dkey-57k17.1;Xt_LOC101735121-like	Dr_si:dkey-57k17.1;Xt_znf281	0	0.408622	0.408622	Eukaryota	Dr_Involuting marginal zone;Dr_Neuroectoderm;Dr_Non-neural ectoderm	Xt_Involuting marginal zone;Xt_Neuroectoderm;Xt_Non-neural ectoderm
Dr_si:dkey-57k17.1;Xt_Xetrov90001667m	Dr_si:dkey-57k17.1;Xt_znf281	0	0.408622	0.408622	Eukaryota	Dr_Involuting marginal zone;Dr_Neuroectoderm;Dr_Non-neural ectoderm	Xt_Involuting marginal zone;Xt_Neuroectoderm;Xt_Non-neural ectoderm
Xt_znf281;Dr_LOC100005963	Xt_znf281;Dr_si:dkey-57k17.1	0	0.408622	0.408622	Eukaryota	Dr_Involuting marginal zone;Dr_Neuroectoderm;Dr_Non-neural ectoderm	Xt_Involuting marginal zone;Xt_Neuroectoderm;Xt_Non-neural ectoderm
Dr_LOC103908654;Xt_Xetrov90001667m	Dr_LOC103908654;Xt_zfat	0	0.408338	0.408338	Eukaryota	Dr_Blastula;Dr_Involuting marginal zone;Dr_Neuroectoderm;Dr_Non-neural ectoderm	Xt_Blastula;Xt_Involuting marginal zone;Xt_Neuroectoderm;Xt_Non-neural ectoderm
Dr_LOC103908654;Xt_LOC100496561	Dr_LOC103908654;Xt_zfat	0	0.408338	0.408338	Eukaryota	Dr_Blastula;Dr_Involuting marginal zone;Dr_Neuroectoderm;Dr_Non-neural ectoderm	Xt_Blastula;Xt_Involuting marginal zone;Xt_Neuroectoderm;Xt_Non-neural ectoderm
Dr_LOC103908654;Xt_znf383	Dr_LOC103908654;Xt_zfat	0	0.408338	0.408338	Eukaryota	Dr_Blastula;Dr_Involuting marginal zone;Dr_Neuroectoderm;Dr_Non-neural ectoderm	Xt_Blastula;Xt_Involuting marginal zone;Xt_Neuroectoderm;Xt_Non-neural ectoderm
Dr_LOC103908654;Xt_LOC101734394	Dr_LOC103908654;Xt_zfat	0	0.408338	0.408338	Eukaryota	Dr_Blastula;Dr_Involuting marginal zone;Dr_Neuroectoderm;Dr_Non-neural ectoderm	Xt_Blastula;Xt_Involuting marginal zone;Xt_Neuroectoderm;Xt_Non-neural ectoderm
Xt_zfat;Dr_zfat	Xt_zfat;Dr_LOC103908654	0	0.408338	0.408338	Eukaryota	Dr_Blastula;Dr_Involuting marginal zone;Dr_Neuroectoderm;Dr_Non-neural ectoderm	Xt_Blastula;Xt_Involuting marginal zone;Xt_Neuroectoderm;Xt_Non-neural ectoderm
Dr_LOC103908654;Xt_Xetrov90015421m	Dr_LOC103908654;Xt_zfat	0	0.408338	0.408338	Eukaryota	Dr_Blastula;Dr_Involuting marginal zone;Dr_Neuroectoderm;Dr_Non-neural ectoderm	Xt_Blastula;Xt_Involuting marginal zone;Xt_Neuroectoderm;Xt_Non-neural ectoderm
Dr_LOC103908654;Xt_LOC100493966	Dr_LOC103908654;Xt_zfat	0	0.408338	0.408338	Eukaryota	Dr_Blastula;Dr_Involuting marginal zone;Dr_Neuroectoderm;Dr_Non-neural ectoderm	Xt_Blastula;Xt_Involuting marginal zone;Xt_Neuroectoderm;Xt_Non-neural ectoderm
Dr_LOC103908654;Xt_znf250	Dr_LOC103908654;Xt_zfat	0	0.408338	0.408338	Eukaryota	Dr_Blastula;Dr_Involuting marginal zone;Dr_Neuroectoderm;Dr_Non-neural ectoderm	Xt_Blastula;Xt_Involuting marginal zone;Xt_Neuroectoderm;Xt_Non-neural ectoderm
Dr_LOC103908654;Xt_Xetrov90008367m	Dr_LOC103908654;Xt_zfat	0	0.408338	0.408338	Eukaryota	Dr_Blastula;Dr_Involuting marginal zone;Dr_Neuroectoderm;Dr_Non-neural ectoderm	Xt_Blastula;Xt_Involuting marginal zone;Xt_Neuroectoderm;Xt_Non-neural ectoderm
Dr_LOC103908654;Xt_znf329	Dr_LOC103908654;Xt_zfat	0	0.408338	0.408338	Eukaryota	Dr_Blastula;Dr_Involuting marginal zone;Dr_Neuroectoderm;Dr_Non-neural ectoderm	Xt_Blastula;Xt_Involuting marginal zone;Xt_Neuroectoderm;Xt_Non-neural ectoderm
Dr_LOC103908654;Xt_LOC101735121-like	Dr_LOC103908654;Xt_zfat	0	0.408338	0.408338	Eukaryota	Dr_Blastula;Dr_Involuting marginal zone;Dr_Neuroectoderm;Dr_Non-neural ectoderm	Xt_Blastula;Xt_Involuting marginal zone;Xt_Neuroectoderm;Xt_Non-neural ectoderm
Dr_kdelr2b;Xt_kdelr2	Dr_kdelr2b;Xt_kdelr3	0	0.406669	0.406669	Eukaryota	Dr_Notochord;Dr_Secretory epidermal	Xt_Cement gland primordium;Xt_Notochord
Dr_zgc:173703;Xt_znf383	Dr_zgc:173703;Xt_znf518b	0	0.406179	0.406179	Eukaryota	Dr_Blastula	Xt_Blastula
Dr_zgc:173703;Xt_Xetrov90001667m	Dr_zgc:173703;Xt_znf518b	0	0.406179	0.406179	Eukaryota	Dr_Blastula	Xt_Blastula
Dr_zgc:173703;Xt_znf329	Dr_zgc:173703;Xt_znf518b	0	0.406179	0.406179	Eukaryota	Dr_Blastula	Xt_Blastula
Dr_zgc:173703;Xt_znf250	Dr_zgc:173703;Xt_znf518b	0	0.406179	0.406179	Eukaryota	Dr_Blastula	Xt_Blastula
Dr_zgc:173703;Xt_Xetrov90029323m	Dr_zgc:173703;Xt_znf518b	0	0.406179	0.406179	Eukaryota	Dr_Blastula	Xt_Blastula
Dr_zgc:173703;Xt_LOC101734394	Dr_zgc:173703;Xt_znf518b	0	0.406179	0.406179	Eukaryota	Dr_Blastula	Xt_Blastula
Dr_zgc:173703;Xt_LOC100493966	Dr_zgc:173703;Xt_znf518b	0	0.406179	0.406179	Eukaryota	Dr_Blastula	Xt_Blastula
Dr_zgc:173703;Xt_LOC100496561	Dr_zgc:173703;Xt_znf518b	0	0.406179	0.406179	Eukaryota	Dr_Blastula	Xt_Blastula
Dr_zgc:173703;Xt_LOC101735121-like	Dr_zgc:173703;Xt_znf518b	0	0.406179	0.406179	Eukaryota	Dr_Blastula	Xt_Blastula
Dr_zgc:174275;Xt_znf250	Dr_zgc:174275;Xt_znf281	0.127652	0.533807	0.406154	Eukaryota	Dr_Blastula;Dr_Involuting marginal zone;Dr_Neuroectoderm;Dr_Non-neural ectoderm	Xt_Blastula;Xt_Involuting marginal zone;Xt_Neuroectoderm;Xt_Non-neural ectoderm
Xt_taf15;Dr_taf15	Xt_taf15;Dr_zranb2	0	0.406092	0.406092	Eukaryota	Dr_Involuting marginal zone;Dr_Neuroectoderm;Dr_Non-neural ectoderm;Dr_Tailbud	Xt_Hindbrain;Xt_Involuting marginal zone;Xt_Neuroectoderm;Xt_Non-neural ectoderm;Xt_Tailbud
Dr_zranb2;Xt_zranb2	Dr_zranb2;Xt_taf15	0	0.406092	0.406092	Eukaryota	Dr_Involuting marginal zone;Dr_Neuroectoderm;Dr_Non-neural ectoderm;Dr_Tailbud	Xt_Hindbrain;Xt_Involuting marginal zone;Xt_Neuroectoderm;Xt_Non-neural ectoderm;Xt_Tailbud
Xt_hoxa11;Dr_hoxa11b	Xt_hoxa11;Dr_hoxc9a	0	0.405776	0.405776	Eukaryota	Dr_Presomitic mesoderm	Xt_Presomitic mesoderm
Dr_rap1aa;Xt_rap1a	Dr_rap1aa;Xt_ralb	0.0236008	0.429049	0.405448	Eukaryota	Dr_Dorsal organizer;Dr_Endoderm;Dr_Involuting marginal zone;Dr_Neuroectoderm;Dr_Non-neural ectoderm;Dr_Notochord	Xt_Endoderm;Xt_Involuting marginal zone;Xt_Neuroectoderm;Xt_Non-neural ectoderm;Xt_Small secretory cells;Xt_Spemann organizer
Dr_LOC100334599;Xt_hba2	Dr_LOC100334599;Xt_LOC101735171	0.219352	0.624512	0.405159	Eukaryota	Dr_Blood	Xt_Blood
Xt_LOC101733226;Dr_eppk1	Xt_LOC101733226;Dr_dspa	0.114733	0.519848	0.405115	Eukaryota	Dr_Endoderm;Dr_Epidermal progenitor;Dr_Ionocyte;Dr_Non-neural ectoderm;Dr_Placodal area;Dr_Rare epidermal subtypes;Dr_Secretory epidermal	Xt_Cement gland primordium;Xt_Epidermal progenitor;Xt_Goblet cell;Xt_Hatching gland;Xt_Ionocyte;Xt_Non-neural ectoderm;Xt_Small secretory cells
Xt_fus;Dr_fus	Xt_fus;Dr_ewsr1b	0.106331	0.511213	0.404881	Eukaryota	Dr_Dorsal organizer;Dr_Endoderm;Dr_Involuting marginal zone;Dr_Neuroectoderm;Dr_Non-neural ectoderm;Dr_Notochord;Dr_Presomitic mesoderm;Dr_Tailbud	Xt_Endoderm;Xt_Hindbrain;Xt_Involuting marginal zone;Xt_Neuroectoderm;Xt_Non-neural ectoderm;Xt_Spemann organizer;Xt_Tailbud
Dr_znf1137;Xt_Xetrov90001667m	Dr_znf1137;Xt_sp5l	0.0158436	0.420722	0.404878	Eukaryota	Dr_Blastula;Dr_Involuting marginal zone;Dr_Neuroectoderm	Xt_Blastula;Xt_Involuting marginal zone;Xt_Neuroectoderm
Dr_rgs2;Xt_rgs2	Dr_rgs2;Xt_rgs1	0	0.404681	0.404681	Eukaryota	Dr_Macrophage	Xt_Myeloid progenitors
Xt_rhoc;Dr_zgc:153713	Xt_rhoc;Dr_rhogc	0	0.404556	0.404556	Eukaryota	Dr_Blastula;Dr_Neuroectoderm;Dr_Non-neural ectoderm	Xt_Blastula;Xt_Neuroectoderm;Xt_Non-neural ectoderm
Dr_zgc:173703;Xt_znf383	Dr_zgc:173703;Xt_znf281	0	0.404482	0.404482	Eukaryota	Dr_Blastula;Dr_Neuroectoderm	Xt_Blastula;Xt_Neuroectoderm;Xt_Non-neural ectoderm
Dr_zgc:173703;Xt_LOC100496561	Dr_zgc:173703;Xt_znf281	0	0.404482	0.404482	Eukaryota	Dr_Blastula;Dr_Neuroectoderm	Xt_Blastula;Xt_Neuroectoderm;Xt_Non-neural ectoderm
Dr_zgc:173703;Xt_Xetrov90029323m	Dr_zgc:173703;Xt_znf281	0	0.404482	0.404482	Eukaryota	Dr_Blastula;Dr_Neuroectoderm	Xt_Blastula;Xt_Neuroectoderm;Xt_Non-neural ectoderm
Dr_zgc:173703;Xt_znf250	Dr_zgc:173703;Xt_znf281	0	0.404482	0.404482	Eukaryota	Dr_Blastula;Dr_Neuroectoderm	Xt_Blastula;Xt_Neuroectoderm;Xt_Non-neural ectoderm
Dr_zgc:173703;Xt_Xetrov90001667m	Dr_zgc:173703;Xt_znf281	0	0.404482	0.404482	Eukaryota	Dr_Blastula;Dr_Neuroectoderm	Xt_Blastula;Xt_Neuroectoderm;Xt_Non-neural ectoderm
Xt_znf281;Dr_LOC100005963	Xt_znf281;Dr_zgc:173703	0	0.404482	0.404482	Eukaryota	Dr_Blastula;Dr_Neuroectoderm	Xt_Blastula;Xt_Neuroectoderm;Xt_Non-neural ectoderm
Dr_zgc:173703;Xt_LOC101734394	Dr_zgc:173703;Xt_znf281	0	0.404482	0.404482	Eukaryota	Dr_Blastula;Dr_Neuroectoderm	Xt_Blastula;Xt_Neuroectoderm;Xt_Non-neural ectoderm
Dr_zgc:173703;Xt_LOC101735121-like	Dr_zgc:173703;Xt_znf281	0	0.404482	0.404482	Eukaryota	Dr_Blastula;Dr_Neuroectoderm	Xt_Blastula;Xt_Neuroectoderm;Xt_Non-neural ectoderm
Dr_zgc:173703;Xt_LOC100493966	Dr_zgc:173703;Xt_znf281	0	0.404482	0.404482	Eukaryota	Dr_Blastula;Dr_Neuroectoderm	Xt_Blastula;Xt_Neuroectoderm;Xt_Non-neural ectoderm
Dr_zgc:173703;Xt_znf329	Dr_zgc:173703;Xt_znf281	0	0.404482	0.404482	Eukaryota	Dr_Blastula;Dr_Neuroectoderm	Xt_Blastula;Xt_Neuroectoderm;Xt_Non-neural ectoderm
Dr_si:dkey-57k17.1;Xt_LOC100496561	Dr_si:dkey-57k17.1;Xt_znf281	0.00428836	0.408622	0.404333	Eukaryota	Dr_Involuting marginal zone;Dr_Neuroectoderm;Dr_Non-neural ectoderm	Xt_Involuting marginal zone;Xt_Neuroectoderm;Xt_Non-neural ectoderm
Xt_myh2;Dr_myhb	Xt_myh2;Dr_myhz1.1	0	0.404248	0.404248	Eukaryota
Xt_myh2;Dr_zgc:66156	Xt_myh2;Dr_myhz1.1	0	0.404248	0.404248	Eukaryota
Xt_myh2;Dr_wu:fd14a01	Xt_myh2;Dr_myhz1.1	0	0.404248	0.404248	Eukaryota
Xt_myh2;Dr_LOC100537594	Xt_myh2;Dr_myhz1.1	0	0.404248	0.404248	Eukaryota
Dr_LOC100334599;Xt_hba2	Dr_LOC100334599;Xt_LOC100145107	0.219352	0.62356	0.404207	Eukaryota	Dr_Blood	Xt_Blood
Dr_srpk3;Xt_srpk3	Dr_srpk3;Xt_LOC100144966	0	0.404063	0.404063	Eukaryota
Dr_srpk3;Xt_srpk1	Dr_srpk3;Xt_LOC100144966	0	0.404063	0.404063	Eukaryota
Xt_LOC100144966;Dr_si:ch211-220i18.4	Xt_LOC100144966;Dr_srpk3	0	0.404063	0.404063	Eukaryota
Dr_ubtf;Xt_ubtf	Dr_ubtf;Xt_hmgb3	0.15508	0.558048	0.402969	Eukaryota	Dr_Dorsal organizer;Dr_Involuting marginal zone;Dr_Neuroectoderm;Dr_Non-neural ectoderm;Dr_Presomitic mesoderm;Dr_Tailbud	Xt_Hindbrain;Xt_Involuting marginal zone;Xt_Neuroectoderm;Xt_Non-neural ectoderm;Xt_Spemann organizer;Xt_Tailbud
Xt_hba3;Dr_hbz	Xt_hba3;Dr_hbbe3	0.551778	0.954636	0.402858	Eukaryota	Dr_Blood	Xt_Blood
Dr_gb:am422109;Xt_LOC100496403-like	Dr_gb:am422109;Xt_bcl6	0.0363686	0.439111	0.402742	Eukaryota	Dr_Blastula	Xt_Blastula
Dr_zgc:174624;Xt_LOC100497179-like	Dr_zgc:174624;Xt_znf281	0.101719	0.504249	0.40253	Eukaryota	Dr_Blastula;Dr_Involuting marginal zone;Dr_Neuroectoderm;Dr_Non-neural ectoderm	Xt_Blastula;Xt_Involuting marginal zone;Xt_Neuroectoderm;Xt_Non-neural ectoderm
Xt_crmp1;Dr_crmp1	Xt_crmp1;Dr_dpysl5a	0	0.402526	0.402526	Eukaryota	Dr_Neuron;Dr_Rohon-beard neuron	Xt_Neuron;Xt_Rohon-beard neuron
Dr_dpysl5a;Xt_dpysl5	Dr_dpysl5a;Xt_crmp1	0	0.402526	0.402526	Eukaryota	Dr_Neuron;Dr_Rohon-beard neuron	Xt_Neuron;Xt_Rohon-beard neuron
Xt_hba-l5;Dr_si:xx-by187g17.1	Xt_hba-l5;Dr_hbbe1.1	0.405273	0.807584	0.402311	Eukaryota	Dr_Blood	Xt_Blood
Dr_sfrs3b;Xt_Xetrov90009871m	Dr_sfrs3b;Xt_srsf7	0	0.401378	0.401378	Eukaryota	Dr_Dorsal organizer;Dr_Endoderm;Dr_Involuting marginal zone;Dr_Neuroectoderm;Dr_Non-neural ectoderm;Dr_Notochord;Dr_Tailbud	Xt_Endoderm;Xt_Hindbrain;Xt_Involuting marginal zone;Xt_Neuroectoderm;Xt_Non-neural ectoderm;Xt_Spemann organizer
Xt_srsf7;Dr_srsf7b	Xt_srsf7;Dr_sfrs3b	0	0.401378	0.401378	Eukaryota	Dr_Dorsal organizer;Dr_Endoderm;Dr_Involuting marginal zone;Dr_Neuroectoderm;Dr_Non-neural ectoderm;Dr_Notochord;Dr_Tailbud	Xt_Endoderm;Xt_Hindbrain;Xt_Involuting marginal zone;Xt_Neuroectoderm;Xt_Non-neural ectoderm;Xt_Spemann organizer
Xt_etv1;Dr_etv1	Xt_etv1;Dr_etv5b	0	0.401365	0.401365	Eukaryota	Dr_Endoderm;Dr_Forebrain/midbrain;Dr_Involuting marginal zone;Dr_Neuroectoderm;Dr_Presomitic mesoderm;Dr_Tailbud	Xt_Endoderm;Xt_Involuting marginal zone;Xt_Neuroectoderm;Xt_Presomitic mesoderm;Xt_Pronephric mesenchyme;Xt_Tailbud
Dr_zgc:174275;Xt_LOC100496561	Dr_zgc:174275;Xt_sp1	0.0119995	0.413265	0.401266	Eukaryota
Xt_hba-l2;Dr_si:xx-by187g17.1	Xt_hba-l2;Dr_hbbe2	0.25417	0.655404	0.401234	Eukaryota	Dr_Blood	Xt_Blood
Dr_syt9a;Xt_Xetrov90010371m	Dr_syt9a;Xt_syt4	0	0.401149	0.401149	Eukaryota
Xt_hba1;Dr_hbz	Xt_hba1;Dr_hbbe3	0.2494	0.649916	0.400516	Eukaryota	Dr_Blood	Xt_Blood
Dr_zgc:173703;Xt_LOC100496403-like	Dr_zgc:173703;Xt_znf518b	0.00604062	0.406179	0.400138	Eukaryota	Dr_Blastula	Xt_Blastula
Dr_si:dkey-57k17.1;Xt_LOC100496403-like	Dr_si:dkey-57k17.1;Xt_znf281	0.00895905	0.408622	0.399662	Eukaryota	Dr_Involuting marginal zone;Dr_Neuroectoderm;Dr_Non-neural ectoderm	Xt_Involuting marginal zone;Xt_Neuroectoderm;Xt_Non-neural ectoderm
Dr_zgc:174275;Xt_Xetrov90001667m	Dr_zgc:174275;Xt_sp1	0.0136898	0.413265	0.399576	Eukaryota
Xt_yy1;Dr_yy1b	Xt_yy1;Dr_zic2b	0.222577	0.621946	0.399369	Eukaryota	Dr_Dorsal organizer;Dr_Involuting marginal zone;Dr_Neuroectoderm;Dr_Non-neural ectoderm	Xt_Involuting marginal zone;Xt_Neuroectoderm;Xt_Non-neural ectoderm;Xt_Spemann organizer
Dr_gli2b;Xt_gli2	Dr_gli2b;Xt_yy1	0	0.399227	0.399227	Eukaryota
Dr_gb:am422109;Xt_LOC100496561	Dr_gb:am422109;Xt_znf217	0	0.399207	0.399207	Eukaryota	Dr_Blastula;Dr_Neuroectoderm;Dr_Non-neural ectoderm	Xt_Blastula;Xt_Neuroectoderm;Xt_Non-neural ectoderm
Dr_gb:am422109;Xt_LOC100493966	Dr_gb:am422109;Xt_znf217	0	0.399207	0.399207	Eukaryota	Dr_Blastula;Dr_Neuroectoderm;Dr_Non-neural ectoderm	Xt_Blastula;Xt_Neuroectoderm;Xt_Non-neural ectoderm
Dr_gb:am422109;Xt_znf250	Dr_gb:am422109;Xt_znf217	0	0.399207	0.399207	Eukaryota	Dr_Blastula;Dr_Neuroectoderm;Dr_Non-neural ectoderm	Xt_Blastula;Xt_Neuroectoderm;Xt_Non-neural ectoderm
Dr_gb:am422109;Xt_Xetrov90001667m	Dr_gb:am422109;Xt_znf217	0	0.399207	0.399207	Eukaryota	Dr_Blastula;Dr_Neuroectoderm;Dr_Non-neural ectoderm	Xt_Blastula;Xt_Neuroectoderm;Xt_Non-neural ectoderm
Dr_gb:am422109;Xt_LOC101735121-like	Dr_gb:am422109;Xt_znf217	0	0.399207	0.399207	Eukaryota	Dr_Blastula;Dr_Neuroectoderm;Dr_Non-neural ectoderm	Xt_Blastula;Xt_Neuroectoderm;Xt_Non-neural ectoderm
Dr_gb:am422109;Xt_LOC101734394	Dr_gb:am422109;Xt_znf217	0	0.399207	0.399207	Eukaryota	Dr_Blastula;Dr_Neuroectoderm;Dr_Non-neural ectoderm	Xt_Blastula;Xt_Neuroectoderm;Xt_Non-neural ectoderm
Dr_gb:am422109;Xt_znf329	Dr_gb:am422109;Xt_znf217	0	0.399207	0.399207	Eukaryota	Dr_Blastula;Dr_Neuroectoderm;Dr_Non-neural ectoderm	Xt_Blastula;Xt_Neuroectoderm;Xt_Non-neural ectoderm
Dr_zgc:174624;Xt_LOC100493966	Dr_zgc:174624;Xt_sp5l	0	0.398689	0.398689	Eukaryota	Dr_Blastula;Dr_Involuting marginal zone;Dr_Neuroectoderm	Xt_Blastula;Xt_Involuting marginal zone;Xt_Neuroectoderm
Dr_zgc:174624;Xt_LOC101735121-like	Dr_zgc:174624;Xt_sp5l	0	0.398689	0.398689	Eukaryota	Dr_Blastula;Dr_Involuting marginal zone;Dr_Neuroectoderm	Xt_Blastula;Xt_Involuting marginal zone;Xt_Neuroectoderm
Dr_zgc:174624;Xt_znf329	Dr_zgc:174624;Xt_sp5l	0	0.398689	0.398689	Eukaryota	Dr_Blastula;Dr_Involuting marginal zone;Dr_Neuroectoderm	Xt_Blastula;Xt_Involuting marginal zone;Xt_Neuroectoderm
Dr_hoxb9a;Xt_hoxb9	Dr_hoxb9a;Xt_hoxc11	0.0703406	0.468829	0.398488	Eukaryota	Dr_Presomitic mesoderm;Dr_Tailbud	Xt_Presomitic mesoderm;Xt_Tailbud
Xt_zbtb10;Dr_zbtb10	Xt_zbtb10;Dr_LOC101885018	0.0152839	0.413733	0.398449	Eukaryota
Dr_zgc:173703;Xt_LOC100496403-like	Dr_zgc:173703;Xt_znf281	0.00604062	0.404482	0.398441	Eukaryota	Dr_Blastula;Dr_Neuroectoderm	Xt_Blastula;Xt_Neuroectoderm;Xt_Non-neural ectoderm
Dr_gb:am422109;Xt_znf383	Dr_gb:am422109;Xt_bcl6	0.0408303	0.439111	0.39828	Eukaryota	Dr_Blastula	Xt_Blastula
Xt_t;Dr_t	Xt_t;Dr_tbx6	0	0.398005	0.398005	Eukaryota	Dr_Involuting marginal zone;Dr_Presomitic mesoderm	Xt_Involuting marginal zone;Xt_Presomitic mesoderm;Xt_Tailbud
Dr_si:dkey-57k17.1;Xt_LOC101734394	Dr_si:dkey-57k17.1;Xt_znf281	0.0107355	0.408622	0.397886	Eukaryota	Dr_Involuting marginal zone;Dr_Neuroectoderm;Dr_Non-neural ectoderm	Xt_Involuting marginal zone;Xt_Neuroectoderm;Xt_Non-neural ectoderm
Xt_hba4;Dr_hbaa1	Xt_hba4;Dr_hbbe2	0.0692819	0.467165	0.397883	Eukaryota
Dr_LOC570015;Xt_znf250	Dr_LOC570015;Xt_zfat	0	0.396941	0.396941	Eukaryota	Dr_Dorsal organizer;Dr_Involuting marginal zone;Dr_Neuroectoderm;Dr_Non-neural ectoderm;Dr_Notochord	Xt_Involuting marginal zone;Xt_Neuroectoderm;Xt_Non-neural ectoderm;Xt_Spemann organizer
Dr_LOC570015;Xt_znf329	Dr_LOC570015;Xt_zfat	0	0.396941	0.396941	Eukaryota	Dr_Dorsal organizer;Dr_Involuting marginal zone;Dr_Neuroectoderm;Dr_Non-neural ectoderm;Dr_Notochord	Xt_Involuting marginal zone;Xt_Neuroectoderm;Xt_Non-neural ectoderm;Xt_Spemann organizer
Dr_LOC570015;Xt_LOC100496403-like	Dr_LOC570015;Xt_zfat	0	0.396941	0.396941	Eukaryota	Dr_Dorsal organizer;Dr_Involuting marginal zone;Dr_Neuroectoderm;Dr_Non-neural ectoderm;Dr_Notochord	Xt_Involuting marginal zone;Xt_Neuroectoderm;Xt_Non-neural ectoderm;Xt_Spemann organizer
Dr_LOC570015;Xt_Xetrov90015419m	Dr_LOC570015;Xt_zfat	0	0.396941	0.396941	Eukaryota	Dr_Dorsal organizer;Dr_Involuting marginal zone;Dr_Neuroectoderm;Dr_Non-neural ectoderm;Dr_Notochord	Xt_Involuting marginal zone;Xt_Neuroectoderm;Xt_Non-neural ectoderm;Xt_Spemann organizer
Xt_zfat;Dr_zfat	Xt_zfat;Dr_LOC570015	0	0.396941	0.396941	Eukaryota	Dr_Dorsal organizer;Dr_Involuting marginal zone;Dr_Neuroectoderm;Dr_Non-neural ectoderm;Dr_Notochord	Xt_Involuting marginal zone;Xt_Neuroectoderm;Xt_Non-neural ectoderm;Xt_Spemann organizer
Dr_LOC570015;Xt_LOC101735121-like	Dr_LOC570015;Xt_zfat	0	0.396941	0.396941	Eukaryota	Dr_Dorsal organizer;Dr_Involuting marginal zone;Dr_Neuroectoderm;Dr_Non-neural ectoderm;Dr_Notochord	Xt_Involuting marginal zone;Xt_Neuroectoderm;Xt_Non-neural ectoderm;Xt_Spemann organizer
Dr_LOC570015;Xt_LOC100497179-like	Dr_LOC570015;Xt_zfat	0	0.396941	0.396941	Eukaryota	Dr_Dorsal organizer;Dr_Involuting marginal zone;Dr_Neuroectoderm;Dr_Non-neural ectoderm;Dr_Notochord	Xt_Involuting marginal zone;Xt_Neuroectoderm;Xt_Non-neural ectoderm;Xt_Spemann organizer
Dr_LOC570015;Xt_Xetrov90001667m	Dr_LOC570015;Xt_zfat	0	0.396941	0.396941	Eukaryota	Dr_Dorsal organizer;Dr_Involuting marginal zone;Dr_Neuroectoderm;Dr_Non-neural ectoderm;Dr_Notochord	Xt_Involuting marginal zone;Xt_Neuroectoderm;Xt_Non-neural ectoderm;Xt_Spemann organizer
Dr_LOC570015;Xt_Xetrov90015421m	Dr_LOC570015;Xt_zfat	0	0.396941	0.396941	Eukaryota	Dr_Dorsal organizer;Dr_Involuting marginal zone;Dr_Neuroectoderm;Dr_Non-neural ectoderm;Dr_Notochord	Xt_Involuting marginal zone;Xt_Neuroectoderm;Xt_Non-neural ectoderm;Xt_Spemann organizer
Dr_LOC570015;Xt_LOC100493966	Dr_LOC570015;Xt_zfat	0	0.396941	0.396941	Eukaryota	Dr_Dorsal organizer;Dr_Involuting marginal zone;Dr_Neuroectoderm;Dr_Non-neural ectoderm;Dr_Notochord	Xt_Involuting marginal zone;Xt_Neuroectoderm;Xt_Non-neural ectoderm;Xt_Spemann organizer
Dr_LOC570015;Xt_Xetrov90029323m	Dr_LOC570015;Xt_zfat	0	0.396941	0.396941	Eukaryota	Dr_Dorsal organizer;Dr_Involuting marginal zone;Dr_Neuroectoderm;Dr_Non-neural ectoderm;Dr_Notochord	Xt_Involuting marginal zone;Xt_Neuroectoderm;Xt_Non-neural ectoderm;Xt_Spemann organizer
Dr_LOC570015;Xt_Xetrov90008367m	Dr_LOC570015;Xt_zfat	0	0.396941	0.396941	Eukaryota	Dr_Dorsal organizer;Dr_Involuting marginal zone;Dr_Neuroectoderm;Dr_Non-neural ectoderm;Dr_Notochord	Xt_Involuting marginal zone;Xt_Neuroectoderm;Xt_Non-neural ectoderm;Xt_Spemann organizer
Dr_LOC570015;Xt_LOC100496561	Dr_LOC570015;Xt_zfat	0	0.396941	0.396941	Eukaryota	Dr_Dorsal organizer;Dr_Involuting marginal zone;Dr_Neuroectoderm;Dr_Non-neural ectoderm;Dr_Notochord	Xt_Involuting marginal zone;Xt_Neuroectoderm;Xt_Non-neural ectoderm;Xt_Spemann organizer
Dr_LOC570015;Xt_znf383	Dr_LOC570015;Xt_zfat	0	0.396941	0.396941	Eukaryota	Dr_Dorsal organizer;Dr_Involuting marginal zone;Dr_Neuroectoderm;Dr_Non-neural ectoderm;Dr_Notochord	Xt_Involuting marginal zone;Xt_Neuroectoderm;Xt_Non-neural ectoderm;Xt_Spemann organizer
Dr_LOC570015;Xt_LOC100495499	Dr_LOC570015;Xt_zfat	0	0.396941	0.396941	Eukaryota	Dr_Dorsal organizer;Dr_Involuting marginal zone;Dr_Neuroectoderm;Dr_Non-neural ectoderm;Dr_Notochord	Xt_Involuting marginal zone;Xt_Neuroectoderm;Xt_Non-neural ectoderm;Xt_Spemann organizer
Dr_hoxd9a;Xt_hoxd9	Dr_hoxd9a;Xt_hoxd10	0	0.396796	0.396796	Eukaryota	Dr_Presomitic mesoderm;Dr_Tailbud	Xt_Presomitic mesoderm;Xt_Tailbud
Dr_zgc:174624;Xt_LOC101735121-like	Dr_zgc:174624;Xt_sp1	0	0.395999	0.395999	Eukaryota
Dr_zgc:174624;Xt_LOC100493966	Dr_zgc:174624;Xt_sp1	0	0.395999	0.395999	Eukaryota
Dr_zgc:174624;Xt_znf329	Dr_zgc:174624;Xt_sp1	0	0.395999	0.395999	Eukaryota
Xt_col6a1;Dr_col6a1	Xt_col6a1;Dr_col11a1a	0	0.395425	0.395425	Eukaryota	Dr_Epidermal progenitor;Dr_Placodal area	Xt_Epidermal progenitor
Xt_hmgb3;Dr_hmgb3a	Xt_hmgb3;Dr_hmgb1a	0.103835	0.498827	0.394993	Eukaryota	Dr_Forebrain/midbrain;Dr_Hindbrain;Dr_Intermediate mesoderm;Dr_Neuroectoderm;Dr_Non-neural ectoderm;Dr_Tailbud	Xt_Eye primordium;Xt_Forebrain/midbrain;Xt_Hindbrain;Xt_Neuroectoderm;Xt_Non-neural ectoderm;Xt_Spemann organizer;Xt_Tailbud
Dr_zgc:174275;Xt_LOC100495499	Dr_zgc:174275;Xt_znf281	0.139446	0.533807	0.39436	Eukaryota	Dr_Blastula;Dr_Involuting marginal zone;Dr_Neuroectoderm;Dr_Non-neural ectoderm	Xt_Blastula;Xt_Involuting marginal zone;Xt_Neuroectoderm;Xt_Non-neural ectoderm
Dr_LOC570015;Xt_LOC101734394	Dr_LOC570015;Xt_zfat	0.00262063	0.396941	0.39432	Eukaryota	Dr_Dorsal organizer;Dr_Involuting marginal zone;Dr_Neuroectoderm;Dr_Non-neural ectoderm;Dr_Notochord	Xt_Involuting marginal zone;Xt_Neuroectoderm;Xt_Non-neural ectoderm;Xt_Spemann organizer
Xt_kctd12;Dr_kctd12.1	Xt_kctd12;Dr_kctd12.2	0	0.394303	0.394303	Eukaryota	Dr_Macrophage	Xt_Myeloid progenitors
Dr_znf1137;Xt_LOC101734394	Dr_znf1137;Xt_sp5l	0.0267137	0.420722	0.394008	Eukaryota	Dr_Blastula;Dr_Involuting marginal zone;Dr_Neuroectoderm	Xt_Blastula;Xt_Involuting marginal zone;Xt_Neuroectoderm
Dr_zgc:173713;Xt_znf250	Dr_zgc:173713;Xt_znf518b	0	0.39368	0.39368	Eukaryota	Dr_Blastula	Xt_Blastula
Dr_zgc:173713;Xt_LOC100496561	Dr_zgc:173713;Xt_znf518b	0	0.39368	0.39368	Eukaryota	Dr_Blastula	Xt_Blastula
Dr_zgc:173713;Xt_Xetrov90029323m	Dr_zgc:173713;Xt_znf518b	0	0.39368	0.39368	Eukaryota	Dr_Blastula	Xt_Blastula
Dr_zgc:173713;Xt_znf383	Dr_zgc:173713;Xt_znf518b	0	0.39368	0.39368	Eukaryota	Dr_Blastula	Xt_Blastula
Dr_zgc:173713;Xt_Xetrov90008367m	Dr_zgc:173713;Xt_znf518b	0	0.39368	0.39368	Eukaryota	Dr_Blastula	Xt_Blastula
Dr_zgc:173713;Xt_LOC101735121-like	Dr_zgc:173713;Xt_znf518b	0	0.39368	0.39368	Eukaryota	Dr_Blastula	Xt_Blastula
Dr_zgc:173713;Xt_znf329	Dr_zgc:173713;Xt_znf518b	0	0.39368	0.39368	Eukaryota	Dr_Blastula	Xt_Blastula
Dr_zgc:173713;Xt_LOC101734394	Dr_zgc:173713;Xt_znf518b	0	0.39368	0.39368	Eukaryota	Dr_Blastula	Xt_Blastula
Dr_zgc:173713;Xt_LOC100493966	Dr_zgc:173713;Xt_znf518b	0	0.39368	0.39368	Eukaryota	Dr_Blastula	Xt_Blastula
Dr_zgc:173713;Xt_Xetrov90001667m	Dr_zgc:173713;Xt_znf518b	0	0.39368	0.39368	Eukaryota	Dr_Blastula	Xt_Blastula
Xt_azin1;Dr_azin1a	Xt_azin1;Dr_odc1	0.0613912	0.454926	0.393535	Eukaryota	Dr_Dorsal organizer;Dr_Eye primordium;Dr_Neuroectoderm;Dr_Non-neural ectoderm;Dr_Notochord;Dr_Tailbud	Xt_Eye primordium;Xt_Hindbrain;Xt_Neuroectoderm;Xt_Non-neural ectoderm;Xt_Spemann organizer;Xt_Tailbud
Dr_zgc:174624;Xt_Xetrov90001667m	Dr_zgc:174624;Xt_sp5l	0.00607913	0.398689	0.39261	Eukaryota	Dr_Blastula;Dr_Involuting marginal zone;Dr_Neuroectoderm	Xt_Blastula;Xt_Involuting marginal zone;Xt_Neuroectoderm
Dr_LOC103908654;Xt_Xetrov90029323m	Dr_LOC103908654;Xt_zfat	0.016767	0.408338	0.391571	Eukaryota	Dr_Blastula;Dr_Involuting marginal zone;Dr_Neuroectoderm;Dr_Non-neural ectoderm	Xt_Blastula;Xt_Involuting marginal zone;Xt_Neuroectoderm;Xt_Non-neural ectoderm
Dr_erf;Xt_erf	Dr_erf;Xt_gabpa	0.022236	0.413559	0.391323	Eukaryota	Dr_Dorsal organizer;Dr_Endoderm;Dr_Intermediate mesoderm;Dr_Involuting marginal zone;Dr_Neuroectoderm;Dr_Non-neural ectoderm	Xt_Endoderm;Xt_Involuting marginal zone;Xt_Neuroectoderm;Xt_Non-neural ectoderm;Xt_Spemann organizer
Dr_hoxa13a;Xt_hoxa13	Dr_hoxa13a;Xt_hoxd10	0	0.391023	0.391023	Eukaryota	Dr_Presomitic mesoderm	Xt_Presomitic mesoderm;Xt_Tailbud
Xt_LOC733709;Dr_her5	Xt_LOC733709;Dr_her1	0	0.391006	0.391006	Eukaryota	Dr_Presomitic mesoderm	Xt_Presomitic mesoderm;Xt_Tailbud
Dr_sfrs3b;Xt_LOC101732133	Dr_sfrs3b;Xt_srsf7	0.0108706	0.401378	0.390507	Eukaryota	Dr_Dorsal organizer;Dr_Endoderm;Dr_Involuting marginal zone;Dr_Neuroectoderm;Dr_Non-neural ectoderm;Dr_Notochord;Dr_Tailbud	Xt_Endoderm;Xt_Hindbrain;Xt_Involuting marginal zone;Xt_Neuroectoderm;Xt_Non-neural ectoderm;Xt_Spemann organizer
Xt_vezf1;Dr_vezf1b	Xt_vezf1;Dr_si:ch211-198a12.6	0.0609945	0.451069	0.390074	Eukaryota	Dr_Involuting marginal zone;Dr_Neuroectoderm;Dr_Non-neural ectoderm	Xt_Involuting marginal zone;Xt_Neuroectoderm;Xt_Non-neural ectoderm
Dr_zgc:174624;Xt_Xetrov90001667m	Dr_zgc:174624;Xt_sp1	0.00607913	0.395999	0.38992	Eukaryota
Dr_zgc:174275;Xt_LOC101734394	Dr_zgc:174275;Xt_sp1	0.0234848	0.413265	0.389781	Eukaryota
Dr_zgc:174275;Xt_LOC100496403-like	Dr_zgc:174275;Xt_sp1	0.0243658	0.413265	0.3889	Eukaryota
Dr_b3gnt7l;Xt_LOC100489267	Dr_b3gnt7l;Xt_b3gnt7	0	0.388855	0.388855	Eukaryota	Dr_Notochord	Xt_Notochord
Xt_b3gnt7;Dr_b3gnt7	Xt_b3gnt7;Dr_b3gnt7l	0	0.388855	0.388855	Eukaryota	Dr_Notochord	Xt_Notochord
Xt_hba-l5;Dr_hbz	Xt_hba-l5;Dr_MGC173646	0.461048	0.849482	0.388434	Eukaryota	Dr_Blood	Xt_Blood
Dr_ddx4;Xt_ddx4	Dr_ddx4;Xt_ddx3x	0.0231646	0.411536	0.388371	Eukaryota	Dr_Blastula;Dr_Dorsal organizer;Dr_Involuting marginal zone;Dr_Neuroectoderm;Dr_Non-neural ectoderm;Dr_Notochord	Xt_Blastula;Xt_Involuting marginal zone;Xt_Neuroectoderm;Xt_Non-neural ectoderm;Xt_Spemann organizer
Dr_znf1137;Xt_LOC100496403-like	Dr_znf1137;Xt_sp5l	0.0324707	0.420722	0.388251	Eukaryota	Dr_Blastula;Dr_Involuting marginal zone;Dr_Neuroectoderm	Xt_Blastula;Xt_Involuting marginal zone;Xt_Neuroectoderm
Dr_zgc:174624;Xt_LOC100496561	Dr_zgc:174624;Xt_sp5l	0.0105979	0.398689	0.388091	Eukaryota	Dr_Blastula;Dr_Involuting marginal zone;Dr_Neuroectoderm	Xt_Blastula;Xt_Involuting marginal zone;Xt_Neuroectoderm
Xt_dnah1;Dr_LOC103911852	Xt_dnah1;Dr_dnah12	0.104767	0.492831	0.388064	Eukaryota
Xt_vezf1;Dr_vezf1b	Xt_vezf1;Dr_LOC570015	0.0609945	0.44885	0.387855	Eukaryota	Dr_Dorsal organizer;Dr_Involuting marginal zone;Dr_Neuroectoderm;Dr_Non-neural ectoderm;Dr_Notochord;Dr_Tailbud	Xt_Involuting marginal zone;Xt_Neuroectoderm;Xt_Non-neural ectoderm;Xt_Spemann organizer;Xt_Tailbud
Dr_zgc:173713;Xt_LOC100496403-like	Dr_zgc:173713;Xt_znf518b	0.00586018	0.39368	0.38782	Eukaryota	Dr_Blastula	Xt_Blastula
Dr_hbae3;Xt_hba2	Dr_hbae3;Xt_LOC101735171	0.213042	0.600071	0.387028	Eukaryota	Dr_Blood	Xt_Blood
Dr_rhogc;Xt_rhog-like.2	Dr_rhogc;Xt_rhoc	0.0175708	0.404556	0.386985	Eukaryota	Dr_Blastula;Dr_Neuroectoderm;Dr_Non-neural ectoderm	Xt_Blastula;Xt_Neuroectoderm;Xt_Non-neural ectoderm
Dr_hbae3;Xt_hba2	Dr_hbae3;Xt_LOC100145107	0.213042	0.599135	0.386092	Eukaryota	Dr_Blood	Xt_Blood
Dr_zgc:174624;Xt_LOC100496561	Dr_zgc:174624;Xt_sp1	0.0105979	0.395999	0.385401	Eukaryota
Xt_hbz;Dr_hbz	Xt_hbz;Dr_hbbe3	0.425578	0.810858	0.38528	Eukaryota	Dr_Blood	Xt_Blood
Dr_LOC100003496;Xt_LOC101735121-like	Dr_LOC100003496;Xt_ctcf	0	0.384477	0.384477	Eukaryota
Dr_LOC100003496;Xt_LOC101734394	Dr_LOC100003496;Xt_ctcf	0	0.384477	0.384477	Eukaryota
Dr_LOC100003496;Xt_LOC100495499	Dr_LOC100003496;Xt_ctcf	0	0.384477	0.384477	Eukaryota
Dr_LOC100003496;Xt_Xetrov90008367m	Dr_LOC100003496;Xt_ctcf	0	0.384477	0.384477	Eukaryota
Dr_LOC100003496;Xt_Xetrov90015419m	Dr_LOC100003496;Xt_ctcf	0	0.384477	0.384477	Eukaryota
Dr_LOC100003496;Xt_znf250	Dr_LOC100003496;Xt_ctcf	0	0.384477	0.384477	Eukaryota
Dr_LOC100003496;Xt_Xetrov90015421m	Dr_LOC100003496;Xt_ctcf	0	0.384477	0.384477	Eukaryota
Dr_LOC100003496;Xt_znf329	Dr_LOC100003496;Xt_ctcf	0	0.384477	0.384477	Eukaryota
Dr_LOC100003496;Xt_LOC100493966	Dr_LOC100003496;Xt_ctcf	0	0.384477	0.384477	Eukaryota
Dr_LOC100003496;Xt_znf383	Dr_LOC100003496;Xt_ctcf	0	0.384477	0.384477	Eukaryota
Dr_LOC100003496;Xt_Xetrov90029323m	Dr_LOC100003496;Xt_ctcf	0	0.384477	0.384477	Eukaryota
Dr_LOC100003496;Xt_Xetrov90001667m	Dr_LOC100003496;Xt_ctcf	0	0.384477	0.384477	Eukaryota
Dr_LOC100003496;Xt_LOC100496403-like	Dr_LOC100003496;Xt_ctcf	0	0.384477	0.384477	Eukaryota
Dr_LOC100003496;Xt_LOC100497179-like	Dr_LOC100003496;Xt_ctcf	0	0.384477	0.384477	Eukaryota
Dr_LOC100003496;Xt_LOC100496561	Dr_LOC100003496;Xt_ctcf	0	0.384477	0.384477	Eukaryota
Xt_hba1;Dr_hbz	Xt_hba1;Dr_hbbe1.1	0.2494	0.633576	0.384176	Eukaryota	Dr_Blood	Xt_Blood
Xt_hoxc4;Dr_hoxc4a	Xt_hoxc4;Dr_hoxb7a	0	0.383666	0.383666	Eukaryota	Dr_Presomitic mesoderm;Dr_Tailbud	Xt_Presomitic mesoderm;Xt_Skeletal muscle;Xt_Tailbud
Dr_hbz;Xt_hba-l4	Dr_hbz;Xt_hbd	0.0287401	0.412372	0.383632	Eukaryota	Dr_Blood	Xt_Blood
Xt_rbp1;Dr_si:ch211-119o8.7	Xt_rbp1;Dr_fabp7a	0	0.383427	0.383427	Eukaryota	Dr_Forebrain/midbrain;Dr_Hindbrain;Dr_Optic	Xt_Eye primordium;Xt_Forebrain/midbrain;Xt_Hindbrain;Xt_Optic
Xt_rbp1;Dr_rbp1	Xt_rbp1;Dr_fabp7a	0	0.383427	0.383427	Eukaryota	Dr_Forebrain/midbrain;Dr_Hindbrain;Dr_Optic	Xt_Eye primordium;Xt_Forebrain/midbrain;Xt_Hindbrain;Xt_Optic
Dr_fabp7a;Xt_LOC100495473	Dr_fabp7a;Xt_rbp1	0	0.383427	0.383427	Eukaryota	Dr_Forebrain/midbrain;Dr_Hindbrain;Dr_Optic	Xt_Eye primordium;Xt_Forebrain/midbrain;Xt_Hindbrain;Xt_Optic
Dr_zgc:174624;Xt_LOC101734394	Dr_zgc:174624;Xt_sp5l	0.015279	0.398689	0.38341	Eukaryota	Dr_Blastula;Dr_Involuting marginal zone;Dr_Neuroectoderm	Xt_Blastula;Xt_Involuting marginal zone;Xt_Neuroectoderm
Dr_zgc:171551;Xt_znf250	Dr_zgc:171551;Xt_ctcf	0	0.382989	0.382989	Eukaryota	Dr_Involuting marginal zone;Dr_Neuroectoderm;Dr_Non-neural ectoderm;Dr_Notochord	Xt_Involuting marginal zone;Xt_Neuroectoderm;Xt_Non-neural ectoderm;Xt_Spemann organizer
Dr_zgc:171551;Xt_Xetrov90015419m	Dr_zgc:171551;Xt_ctcf	0	0.382989	0.382989	Eukaryota	Dr_Involuting marginal zone;Dr_Neuroectoderm;Dr_Non-neural ectoderm;Dr_Notochord	Xt_Involuting marginal zone;Xt_Neuroectoderm;Xt_Non-neural ectoderm;Xt_Spemann organizer
Dr_zgc:171551;Xt_LOC100497179-like	Dr_zgc:171551;Xt_ctcf	0	0.382989	0.382989	Eukaryota	Dr_Involuting marginal zone;Dr_Neuroectoderm;Dr_Non-neural ectoderm;Dr_Notochord	Xt_Involuting marginal zone;Xt_Neuroectoderm;Xt_Non-neural ectoderm;Xt_Spemann organizer
Dr_zgc:171551;Xt_LOC101734394	Dr_zgc:171551;Xt_ctcf	0	0.382989	0.382989	Eukaryota	Dr_Involuting marginal zone;Dr_Neuroectoderm;Dr_Non-neural ectoderm;Dr_Notochord	Xt_Involuting marginal zone;Xt_Neuroectoderm;Xt_Non-neural ectoderm;Xt_Spemann organizer
Dr_zgc:171551;Xt_LOC100495499	Dr_zgc:171551;Xt_ctcf	0	0.382989	0.382989	Eukaryota	Dr_Involuting marginal zone;Dr_Neuroectoderm;Dr_Non-neural ectoderm;Dr_Notochord	Xt_Involuting marginal zone;Xt_Neuroectoderm;Xt_Non-neural ectoderm;Xt_Spemann organizer
Dr_zgc:171551;Xt_LOC101735121-like	Dr_zgc:171551;Xt_ctcf	0	0.382989	0.382989	Eukaryota	Dr_Involuting marginal zone;Dr_Neuroectoderm;Dr_Non-neural ectoderm;Dr_Notochord	Xt_Involuting marginal zone;Xt_Neuroectoderm;Xt_Non-neural ectoderm;Xt_Spemann organizer
Dr_zgc:171551;Xt_znf329	Dr_zgc:171551;Xt_ctcf	0	0.382989	0.382989	Eukaryota	Dr_Involuting marginal zone;Dr_Neuroectoderm;Dr_Non-neural ectoderm;Dr_Notochord	Xt_Involuting marginal zone;Xt_Neuroectoderm;Xt_Non-neural ectoderm;Xt_Spemann organizer
Dr_zgc:171551;Xt_LOC100496561	Dr_zgc:171551;Xt_ctcf	0	0.382989	0.382989	Eukaryota	Dr_Involuting marginal zone;Dr_Neuroectoderm;Dr_Non-neural ectoderm;Dr_Notochord	Xt_Involuting marginal zone;Xt_Neuroectoderm;Xt_Non-neural ectoderm;Xt_Spemann organizer
Dr_zgc:171551;Xt_Xetrov90008367m	Dr_zgc:171551;Xt_ctcf	0	0.382989	0.382989	Eukaryota	Dr_Involuting marginal zone;Dr_Neuroectoderm;Dr_Non-neural ectoderm;Dr_Notochord	Xt_Involuting marginal zone;Xt_Neuroectoderm;Xt_Non-neural ectoderm;Xt_Spemann organizer
Dr_zgc:171551;Xt_Xetrov90001667m	Dr_zgc:171551;Xt_ctcf	0	0.382989	0.382989	Eukaryota	Dr_Involuting marginal zone;Dr_Neuroectoderm;Dr_Non-neural ectoderm;Dr_Notochord	Xt_Involuting marginal zone;Xt_Neuroectoderm;Xt_Non-neural ectoderm;Xt_Spemann organizer
Dr_zgc:171551;Xt_LOC100496403-like	Dr_zgc:171551;Xt_ctcf	0	0.382989	0.382989	Eukaryota	Dr_Involuting marginal zone;Dr_Neuroectoderm;Dr_Non-neural ectoderm;Dr_Notochord	Xt_Involuting marginal zone;Xt_Neuroectoderm;Xt_Non-neural ectoderm;Xt_Spemann organizer
Dr_zgc:171551;Xt_Xetrov90029323m	Dr_zgc:171551;Xt_ctcf	0	0.382989	0.382989	Eukaryota	Dr_Involuting marginal zone;Dr_Neuroectoderm;Dr_Non-neural ectoderm;Dr_Notochord	Xt_Involuting marginal zone;Xt_Neuroectoderm;Xt_Non-neural ectoderm;Xt_Spemann organizer
Dr_zgc:171551;Xt_LOC100493966	Dr_zgc:171551;Xt_ctcf	0	0.382989	0.382989	Eukaryota	Dr_Involuting marginal zone;Dr_Neuroectoderm;Dr_Non-neural ectoderm;Dr_Notochord	Xt_Involuting marginal zone;Xt_Neuroectoderm;Xt_Non-neural ectoderm;Xt_Spemann organizer
Xt_hnrnpa1;Dr_hnrnpa3	Xt_hnrnpa1;Dr_hnrnpa0a	0	0.382447	0.382447	Eukaryota
Xt_hnrnpa1;Dr_hnrnpa1b	Xt_hnrnpa1;Dr_hnrnpa0a	0	0.382447	0.382447	Eukaryota
Xt_hba-l5;Dr_hbz	Xt_hba-l5;Dr_si:ch211-5k11.12	0.461048	0.843407	0.382359	Eukaryota	Dr_Blood	Xt_Blood
Dr_LOC101886587;Xt_galnt5-like	Dr_LOC101886587;Xt_galnt4	0	0.381976	0.381976	Eukaryota	Dr_Secretory epidermal	Xt_Cement gland primordium
Xt_ralb;Dr_kras	Xt_ralb;Dr_rap1aa	0.0474232	0.429049	0.381625	Eukaryota	Dr_Dorsal organizer;Dr_Endoderm;Dr_Involuting marginal zone;Dr_Neuroectoderm;Dr_Non-neural ectoderm;Dr_Notochord	Xt_Endoderm;Xt_Involuting marginal zone;Xt_Neuroectoderm;Xt_Non-neural ectoderm;Xt_Small secretory cells;Xt_Spemann organizer
Xt_irx5;Dr_irx5b	Xt_irx5;Dr_irx3a	0	0.381594	0.381594	Eukaryota	Dr_Notochord	Xt_Notochord
Xt_ca2;Dr_cahz	Xt_ca2;Dr_ca15c	0	0.3809	0.3809	Eukaryota
Dr_LOC103908654;Xt_LOC100496403-like	Dr_LOC103908654;Xt_zfat	0.0275308	0.408338	0.380807	Eukaryota	Dr_Blastula;Dr_Involuting marginal zone;Dr_Neuroectoderm;Dr_Non-neural ectoderm	Xt_Blastula;Xt_Involuting marginal zone;Xt_Neuroectoderm;Xt_Non-neural ectoderm
Dr_zgc:174624;Xt_LOC101734394	Dr_zgc:174624;Xt_sp1	0.015279	0.395999	0.38072	Eukaryota
Dr_si:dkey-238o14.9;Xt_Xetrov90001667m	Dr_si:dkey-238o14.9;Xt_sp5l	0	0.380414	0.380414	Eukaryota	Dr_Endoderm;Dr_Involuting marginal zone;Dr_Neuroectoderm;Dr_Tailbud	Xt_Endoderm;Xt_Involuting marginal zone;Xt_Neuroectoderm;Xt_Tailbud
Dr_si:dkey-238o14.9;Xt_znf250	Dr_si:dkey-238o14.9;Xt_sp5l	0	0.380414	0.380414	Eukaryota	Dr_Endoderm;Dr_Involuting marginal zone;Dr_Neuroectoderm;Dr_Tailbud	Xt_Endoderm;Xt_Involuting marginal zone;Xt_Neuroectoderm;Xt_Tailbud
Dr_si:dkey-238o14.9;Xt_LOC100493966	Dr_si:dkey-238o14.9;Xt_sp5l	0	0.380414	0.380414	Eukaryota	Dr_Endoderm;Dr_Involuting marginal zone;Dr_Neuroectoderm;Dr_Tailbud	Xt_Endoderm;Xt_Involuting marginal zone;Xt_Neuroectoderm;Xt_Tailbud
Dr_si:dkey-238o14.9;Xt_LOC100496403-like	Dr_si:dkey-238o14.9;Xt_sp5l	0	0.380414	0.380414	Eukaryota	Dr_Endoderm;Dr_Involuting marginal zone;Dr_Neuroectoderm;Dr_Tailbud	Xt_Endoderm;Xt_Involuting marginal zone;Xt_Neuroectoderm;Xt_Tailbud
Dr_si:dkey-238o14.9;Xt_LOC100497179-like	Dr_si:dkey-238o14.9;Xt_sp5l	0	0.380414	0.380414	Eukaryota	Dr_Endoderm;Dr_Involuting marginal zone;Dr_Neuroectoderm;Dr_Tailbud	Xt_Endoderm;Xt_Involuting marginal zone;Xt_Neuroectoderm;Xt_Tailbud
Dr_znf1137;Xt_LOC100495499	Dr_znf1137;Xt_znf281	0.164972	0.544638	0.379665	Eukaryota	Dr_Blastula;Dr_Involuting marginal zone;Dr_Neuroectoderm;Dr_Non-neural ectoderm	Xt_Blastula;Xt_Involuting marginal zone;Xt_Neuroectoderm;Xt_Non-neural ectoderm
Dr_rufy3;Xt_rufy3	Dr_rufy3;Xt_rundc3a	0.0880667	0.467723	0.379656	Eukaryota	Dr_Neuron;Dr_Rohon-beard neuron	Xt_Neuron;Xt_Rohon-beard neuron
Xt_rabgap1l;Dr_rabgap1l	Xt_rabgap1l;Dr_rabgap1l2	0.111042	0.4906	0.379558	Eukaryota
Xt_tfec;Dr_tfec	Xt_tfec;Dr_mitfa	0	0.379022	0.379022	Eukaryota
Dr_si:dkey-238o14.9;Xt_LOC100496561	Dr_si:dkey-238o14.9;Xt_sp5l	0.00140431	0.380414	0.37901	Eukaryota	Dr_Endoderm;Dr_Involuting marginal zone;Dr_Neuroectoderm;Dr_Tailbud	Xt_Endoderm;Xt_Involuting marginal zone;Xt_Neuroectoderm;Xt_Tailbud
Xt_hba1;Dr_hbz	Xt_hba1;Dr_si:ch211-5k11.12	0.2494	0.628301	0.378901	Eukaryota	Dr_Blood	Xt_Blood
Dr_LOC103910469;Xt_Xetrov90015419m	Dr_LOC103910469;Xt_bcl6	0.109248	0.487935	0.378687	Eukaryota	Dr_Blastula	Xt_Blastula
Dr_si:xx-by187g17.1;Xt_hba2	Dr_si:xx-by187g17.1;Xt_hbd	0	0.378529	0.378529	Eukaryota
Dr_si:xx-by187g17.1;Xt_hba-l3	Dr_si:xx-by187g17.1;Xt_hbd	0	0.378529	0.378529	Eukaryota
Dr_zgc:174624;Xt_LOC101735121-like	Dr_zgc:174624;Xt_znf217	0	0.378357	0.378357	Eukaryota	Dr_Blastula;Dr_Neuroectoderm;Dr_Non-neural ectoderm	Xt_Blastula;Xt_Neuroectoderm;Xt_Non-neural ectoderm
Dr_zgc:174624;Xt_znf329	Dr_zgc:174624;Xt_znf217	0	0.378357	0.378357	Eukaryota	Dr_Blastula;Dr_Neuroectoderm;Dr_Non-neural ectoderm	Xt_Blastula;Xt_Neuroectoderm;Xt_Non-neural ectoderm
Dr_zgc:174624;Xt_LOC100493966	Dr_zgc:174624;Xt_znf217	0	0.378357	0.378357	Eukaryota	Dr_Blastula;Dr_Neuroectoderm;Dr_Non-neural ectoderm	Xt_Blastula;Xt_Neuroectoderm;Xt_Non-neural ectoderm
Xt_LOC100496216;Dr_LOC569206	Xt_LOC100496216;Dr_fhdc3	0	0.378003	0.378003	Eukaryota	Dr_Blastula	Xt_Blastula
Xt_hbz;Dr_hbz	Xt_hbz;Dr_MGC173646	0.425578	0.803561	0.377983	Eukaryota	Dr_Blood	Xt_Blood
Xt_hbz;Dr_si:xx-by187g17.1	Xt_hbz;Dr_zgc:163057	0.353392	0.731305	0.377912	Eukaryota	Dr_Blood	Xt_Blood
Dr_zgc:174624;Xt_LOC100495499	Dr_zgc:174624;Xt_znf281	0.126663	0.504249	0.377586	Eukaryota	Dr_Blastula;Dr_Involuting marginal zone;Dr_Neuroectoderm;Dr_Non-neural ectoderm	Xt_Blastula;Xt_Involuting marginal zone;Xt_Neuroectoderm;Xt_Non-neural ectoderm
Dr_zgc:174624;Xt_LOC100496403-like	Dr_zgc:174624;Xt_sp5l	0.0211449	0.398689	0.377544	Eukaryota	Dr_Blastula;Dr_Involuting marginal zone;Dr_Neuroectoderm	Xt_Blastula;Xt_Involuting marginal zone;Xt_Neuroectoderm
Xt_hba1;Dr_si:xx-by187g17.1	Xt_hba1;Dr_zgc:163057	0.0781391	0.455607	0.377468	Eukaryota	Dr_Blood	Xt_Blood
Xt_hba-l5;Dr_hbz	Xt_hba-l5;Dr_hbbe3	0.461048	0.837907	0.376859	Eukaryota	Dr_Blood	Xt_Blood
Dr_LOC100001080;Xt_Xetrov90015419m	Dr_LOC100001080;Xt_ctcf	0	0.375595	0.375595	Eukaryota
Dr_LOC100001080;Xt_znf329	Dr_LOC100001080;Xt_ctcf	0	0.375595	0.375595	Eukaryota
Dr_LOC100001080;Xt_znf250	Dr_LOC100001080;Xt_ctcf	0	0.375595	0.375595	Eukaryota
Dr_LOC100001080;Xt_znf383	Dr_LOC100001080;Xt_ctcf	0	0.375595	0.375595	Eukaryota
Dr_LOC100001080;Xt_Xetrov90029323m	Dr_LOC100001080;Xt_ctcf	0	0.375595	0.375595	Eukaryota
Dr_LOC100001080;Xt_LOC101734394	Dr_LOC100001080;Xt_ctcf	0	0.375595	0.375595	Eukaryota
Dr_LOC100001080;Xt_LOC100497179-like	Dr_LOC100001080;Xt_ctcf	0	0.375595	0.375595	Eukaryota
Dr_LOC100001080;Xt_Xetrov90015421m	Dr_LOC100001080;Xt_ctcf	0	0.375595	0.375595	Eukaryota
Dr_LOC100001080;Xt_LOC100493966	Dr_LOC100001080;Xt_ctcf	0	0.375595	0.375595	Eukaryota
Dr_LOC100001080;Xt_LOC100495499	Dr_LOC100001080;Xt_ctcf	0	0.375595	0.375595	Eukaryota
Dr_LOC100001080;Xt_LOC100496403-like	Dr_LOC100001080;Xt_ctcf	0	0.375595	0.375595	Eukaryota
Dr_LOC100001080;Xt_LOC100496561	Dr_LOC100001080;Xt_ctcf	0	0.375595	0.375595	Eukaryota
Dr_LOC100001080;Xt_Xetrov90008367m	Dr_LOC100001080;Xt_ctcf	0	0.375595	0.375595	Eukaryota
Dr_LOC100001080;Xt_Xetrov90001667m	Dr_LOC100001080;Xt_ctcf	0	0.375595	0.375595	Eukaryota
Dr_LOC100001080;Xt_LOC101735121-like	Dr_LOC100001080;Xt_ctcf	0	0.375595	0.375595	Eukaryota
Dr_si:dkey-57k17.1;Xt_LOC100497179-like	Dr_si:dkey-57k17.1;Xt_znf281	0.0336142	0.408622	0.375007	Eukaryota	Dr_Involuting marginal zone;Dr_Neuroectoderm;Dr_Non-neural ectoderm	Xt_Involuting marginal zone;Xt_Neuroectoderm;Xt_Non-neural ectoderm
Dr_zgc:174624;Xt_LOC100496403-like	Dr_zgc:174624;Xt_sp1	0.0211449	0.395999	0.374855	Eukaryota
Xt_ca12;Dr_ca12	Xt_ca12;Dr_ca15c	0	0.374851	0.374851	Eukaryota
Dr_col14a1a;Xt_col14a1	Dr_col14a1a;Xt_LOC100486063	0.276236	0.651051	0.374815	Eukaryota	Dr_Epidermal progenitor;Dr_Lens;Dr_Placodal area	Xt_Epidermal progenitor;Xt_Lens;Xt_Placodal area
Xt_rras;Dr_rras2	Xt_rras;Dr_rap1b	0	0.374039	0.374039	Eukaryota	Dr_Endothelial;Dr_Epidermal progenitor;Dr_Intermediate mesoderm;Dr_Placodal area	Xt_Endothelial;Xt_Epidermal progenitor;Xt_Placodal area
Dr_zgc:173703;Xt_Xetrov90008367m	Dr_zgc:173703;Xt_znf518b	0.0322744	0.406179	0.373904	Eukaryota	Dr_Blastula	Xt_Blastula
Xt_LOC100486867-like;Dr_si:ch211-197n1.2	Xt_LOC100486867-like;Dr_LOC103909842	0	0.373902	0.373902	Eukaryota
Dr_ugt1b7;Xt_LOC100489505-like	Dr_ugt1b7;Xt_LOC100488176-like	0	0.373807	0.373807	Eukaryota
Dr_ugt1b7;Xt_LOC101734295	Dr_ugt1b7;Xt_LOC100488176-like	0	0.373807	0.373807	Eukaryota
Dr_ugt1b7;Xt_Xetrov90024081m	Dr_ugt1b7;Xt_LOC100488176-like	0	0.373807	0.373807	Eukaryota
Xt_LOC101730842;Dr_sptbn1	Xt_LOC101730842;Dr_LOC100149084	0	0.373669	0.373669	Eukaryota	Dr_Skeletal muscle	Xt_Skeletal muscle
Dr_LOC100149084;Xt_LOC100494783	Dr_LOC100149084;Xt_LOC101730842	0	0.373669	0.373669	Eukaryota	Dr_Skeletal muscle	Xt_Skeletal muscle
Dr_LOC100330526;Xt_Xetrov90015419m	Dr_LOC100330526;Xt_ctcf	0	0.373479	0.373479	Eukaryota
Dr_LOC100330526;Xt_LOC100496403-like	Dr_LOC100330526;Xt_ctcf	0	0.373479	0.373479	Eukaryota
Dr_LOC100330526;Xt_Xetrov90008367m	Dr_LOC100330526;Xt_ctcf	0	0.373479	0.373479	Eukaryota
Dr_LOC100330526;Xt_LOC100495499	Dr_LOC100330526;Xt_ctcf	0	0.373479	0.373479	Eukaryota
Dr_LOC100330526;Xt_LOC100496561	Dr_LOC100330526;Xt_ctcf	0	0.373479	0.373479	Eukaryota
Dr_LOC100330526;Xt_Xetrov90015421m	Dr_LOC100330526;Xt_ctcf	0	0.373479	0.373479	Eukaryota
Dr_LOC100330526;Xt_LOC101735121-like	Dr_LOC100330526;Xt_ctcf	0	0.373479	0.373479	Eukaryota
Dr_LOC100330526;Xt_znf383	Dr_LOC100330526;Xt_ctcf	0	0.373479	0.373479	Eukaryota
Dr_LOC100330526;Xt_znf250	Dr_LOC100330526;Xt_ctcf	0	0.373479	0.373479	Eukaryota
Dr_LOC100330526;Xt_znf329	Dr_LOC100330526;Xt_ctcf	0	0.373479	0.373479	Eukaryota
Dr_LOC100330526;Xt_LOC100493966	Dr_LOC100330526;Xt_ctcf	0	0.373479	0.373479	Eukaryota
Dr_LOC100330526;Xt_Xetrov90029323m	Dr_LOC100330526;Xt_ctcf	0	0.373479	0.373479	Eukaryota
Dr_LOC100330526;Xt_LOC100497179-like	Dr_LOC100330526;Xt_ctcf	0	0.373479	0.373479	Eukaryota
Dr_LOC100330526;Xt_Xetrov90001667m	Dr_LOC100330526;Xt_ctcf	0	0.373479	0.373479	Eukaryota
Dr_LOC100330526;Xt_LOC101734394	Dr_LOC100330526;Xt_ctcf	0	0.373479	0.373479	Eukaryota
Dr_zgc:174624;Xt_Xetrov90001667m	Dr_zgc:174624;Xt_znf217	0.00607913	0.378357	0.372278	Eukaryota	Dr_Blastula;Dr_Neuroectoderm;Dr_Non-neural ectoderm	Xt_Blastula;Xt_Neuroectoderm;Xt_Non-neural ectoderm
Dr_zgc:173703;Xt_Xetrov90008367m	Dr_zgc:173703;Xt_znf281	0.0322744	0.404482	0.372208	Eukaryota	Dr_Blastula;Dr_Neuroectoderm	Xt_Blastula;Xt_Neuroectoderm;Xt_Non-neural ectoderm
Xt_hba-l5;Dr_hbz	Xt_hba-l5;Dr_hbbe2	0.461048	0.833071	0.372023	Eukaryota	Dr_Blood	Xt_Blood
Xt_znf281;Dr_LOC100005963	Xt_znf281;Dr_znf740a	0	0.37191	0.37191	Eukaryota	Dr_Blastula	Xt_Blastula
Dr_LOC103908654;Xt_LOC101735121-like	Dr_LOC103908654;Xt_znf518b	0	0.371628	0.371628	Eukaryota	Dr_Blastula;Dr_Involuting marginal zone	Xt_Blastula;Xt_Involuting marginal zone
Dr_LOC103908654;Xt_Xetrov90001667m	Dr_LOC103908654;Xt_znf518b	0	0.371628	0.371628	Eukaryota	Dr_Blastula;Dr_Involuting marginal zone	Xt_Blastula;Xt_Involuting marginal zone
Dr_LOC103908654;Xt_LOC100496561	Dr_LOC103908654;Xt_znf518b	0	0.371628	0.371628	Eukaryota	Dr_Blastula;Dr_Involuting marginal zone	Xt_Blastula;Xt_Involuting marginal zone
Dr_LOC103908654;Xt_LOC101734394	Dr_LOC103908654;Xt_znf518b	0	0.371628	0.371628	Eukaryota	Dr_Blastula;Dr_Involuting marginal zone	Xt_Blastula;Xt_Involuting marginal zone
Dr_LOC103908654;Xt_znf329	Dr_LOC103908654;Xt_znf518b	0	0.371628	0.371628	Eukaryota	Dr_Blastula;Dr_Involuting marginal zone	Xt_Blastula;Xt_Involuting marginal zone
Dr_LOC103908654;Xt_LOC100493966	Dr_LOC103908654;Xt_znf518b	0	0.371628	0.371628	Eukaryota	Dr_Blastula;Dr_Involuting marginal zone	Xt_Blastula;Xt_Involuting marginal zone
Dr_LOC103908654;Xt_Xetrov90015421m	Dr_LOC103908654;Xt_znf518b	0	0.371628	0.371628	Eukaryota	Dr_Blastula;Dr_Involuting marginal zone	Xt_Blastula;Xt_Involuting marginal zone
Dr_LOC103908654;Xt_znf383	Dr_LOC103908654;Xt_znf518b	0	0.371628	0.371628	Eukaryota	Dr_Blastula;Dr_Involuting marginal zone	Xt_Blastula;Xt_Involuting marginal zone
Dr_LOC103908654;Xt_znf250	Dr_LOC103908654;Xt_znf518b	0	0.371628	0.371628	Eukaryota	Dr_Blastula;Dr_Involuting marginal zone	Xt_Blastula;Xt_Involuting marginal zone
Dr_LOC103908654;Xt_Xetrov90008367m	Dr_LOC103908654;Xt_znf518b	0	0.371628	0.371628	Eukaryota	Dr_Blastula;Dr_Involuting marginal zone	Xt_Blastula;Xt_Involuting marginal zone
Dr_pkp2;Xt_pkp2	Dr_pkp2;Xt_pkp3	0	0.371518	0.371518	Eukaryota	Dr_Epidermal progenitor;Dr_Ionocyte;Dr_Placodal area;Dr_Rare epidermal subtypes	Xt_Epidermal progenitor;Xt_Goblet cell;Xt_Hatching gland;Xt_Ionocyte;Xt_Small secretory cells
Xt_pkp3;Dr_LOC100330353	Xt_pkp3;Dr_pkp2	0	0.371518	0.371518	Eukaryota	Dr_Epidermal progenitor;Dr_Ionocyte;Dr_Placodal area;Dr_Rare epidermal subtypes	Xt_Epidermal progenitor;Xt_Goblet cell;Xt_Hatching gland;Xt_Ionocyte;Xt_Small secretory cells
Xt_hmgb3;Dr_hmgb3a	Xt_hmgb3;Dr_tox4	0.103835	0.475221	0.371386	Eukaryota
Xt_ak7;Dr_ak7a	Xt_ak7;Dr_ak8	0.299432	0.669542	0.37011	Eukaryota
Dr_gb:am422109;Xt_Xetrov90029323m	Dr_gb:am422109;Xt_bcl6	0.0697469	0.439111	0.369364	Eukaryota	Dr_Blastula	Xt_Blastula
Dr_LOC103910469;Xt_LOC100497179-like	Dr_LOC103910469;Xt_bcl6	0.119253	0.487935	0.368682	Eukaryota	Dr_Blastula	Xt_Blastula
Dr_zgc:173915;Xt_LOC101731491	Dr_zgc:173915;Xt_Xetrov90030286m	0	0.368549	0.368549	Eukaryota
Dr_zgc:173915;Xt_LOC100488644	Dr_zgc:173915;Xt_Xetrov90030286m	0	0.368549	0.368549	Eukaryota
Dr_zgc:173915;Xt_LOC100488329	Dr_zgc:173915;Xt_Xetrov90030286m	0	0.368549	0.368549	Eukaryota
Dr_hoxa13b;Xt_hoxa13	Dr_hoxa13b;Xt_hoxc11	0	0.368486	0.368486	Eukaryota
Dr_hoxb9a;Xt_hoxb9	Dr_hoxb9a;Xt_hoxa11	0.0703406	0.438349	0.368008	Eukaryota	Dr_Presomitic mesoderm	Xt_Presomitic mesoderm
Xt_hoxc6;Dr_hoxc6a	Xt_hoxc6;Dr_hoxc3a	0	0.367972	0.367972	Eukaryota	Dr_Intermediate mesoderm;Dr_Presomitic mesoderm;Dr_Tailbud	Xt_Intermediate mesoderm;Xt_Presomitic mesoderm;Xt_Tailbud
Dr_zgc:174624;Xt_LOC100496561	Dr_zgc:174624;Xt_znf217	0.0105979	0.378357	0.367759	Eukaryota	Dr_Blastula;Dr_Neuroectoderm;Dr_Non-neural ectoderm	Xt_Blastula;Xt_Neuroectoderm;Xt_Non-neural ectoderm
Xt_nkx2-1;Dr_nkx2.1	Xt_nkx2-1;Dr_nkx2.2a	0.333604	0.70094	0.367337	Eukaryota	Dr_Forebrain/midbrain	Xt_Forebrain/midbrain
Dr_tbpl2;Xt_tbpl2	Dr_tbpl2;Xt_tbpl1	0	0.366832	0.366832	Eukaryota
Xt_rhoc;Dr_zgc:153713	Xt_rhoc;Dr_rac1a	0	0.366631	0.366631	Eukaryota	Dr_Blastula;Dr_Endoderm;Dr_Involuting marginal zone;Dr_Neuroectoderm;Dr_Non-neural ectoderm	Xt_Blastula;Xt_Endoderm;Xt_Involuting marginal zone;Xt_Neuroectoderm;Xt_Non-neural ectoderm
Dr_rac1a;Xt_rac2	Dr_rac1a;Xt_rhoc	0	0.366631	0.366631	Eukaryota	Dr_Blastula;Dr_Endoderm;Dr_Involuting marginal zone;Dr_Neuroectoderm;Dr_Non-neural ectoderm	Xt_Blastula;Xt_Endoderm;Xt_Involuting marginal zone;Xt_Neuroectoderm;Xt_Non-neural ectoderm
Xt_rhog-like.1;Dr_rhogb	Xt_rhog-like.1;Dr_rac1a	0	0.36661	0.36661	Eukaryota	Dr_Blastula;Dr_Involuting marginal zone	Xt_Blastula;Xt_Involuting marginal zone
Xt_rhog-like.1;Dr_rhogd	Xt_rhog-like.1;Dr_rac1a	0	0.36661	0.36661	Eukaryota	Dr_Blastula;Dr_Involuting marginal zone	Xt_Blastula;Xt_Involuting marginal zone
Xt_rhog-like.1;Dr_rhoga	Xt_rhog-like.1;Dr_rac1a	0	0.36661	0.36661	Eukaryota	Dr_Blastula;Dr_Involuting marginal zone	Xt_Blastula;Xt_Involuting marginal zone
Dr_rac1a;Xt_rac2	Dr_rac1a;Xt_rhog-like.1	0	0.36661	0.36661	Eukaryota	Dr_Blastula;Dr_Involuting marginal zone	Xt_Blastula;Xt_Involuting marginal zone
Xt_hnrnpa1;Dr_hnrnpa1b	Xt_hnrnpa1;Dr_hnrnpaba	0	0.366455	0.366455	Eukaryota
Xt_hnrnpa1;Dr_hnrnpa3	Xt_hnrnpa1;Dr_hnrnpaba	0	0.366455	0.366455	Eukaryota
Dr_si:ch211-202f3.3;Xt_capn14	Dr_si:ch211-202f3.3;Xt_LOC100498169	0	0.365554	0.365554	Eukaryota	Dr_Epidermal progenitor	Xt_Epidermal progenitor
Dr_znf1137;Xt_znf329	Dr_znf1137;Xt_bcl6	0	0.365453	0.365453	Eukaryota	Dr_Blastula	Xt_Blastula
Xt_bcl6;Dr_bcl6a	Xt_bcl6;Dr_znf1137	0	0.365453	0.365453	Eukaryota	Dr_Blastula	Xt_Blastula
Dr_znf1137;Xt_LOC100493966	Dr_znf1137;Xt_bcl6	0	0.365453	0.365453	Eukaryota	Dr_Blastula	Xt_Blastula
Dr_znf1137;Xt_znf250	Dr_znf1137;Xt_bcl6	0	0.365453	0.365453	Eukaryota	Dr_Blastula	Xt_Blastula
Xt_col5a1-like;Dr_col5a1	Xt_col5a1-like;Dr_zgc:113232	0.224044	0.589481	0.365437	Eukaryota
Dr_si:dkey-238o14.9;Xt_Xetrov90001667m	Dr_si:dkey-238o14.9;Xt_znf281	0	0.365165	0.365165	Eukaryota	Dr_Endoderm;Dr_Involuting marginal zone;Dr_Neuroectoderm;Dr_Non-neural ectoderm	Xt_Endoderm;Xt_Involuting marginal zone;Xt_Neuroectoderm;Xt_Non-neural ectoderm
Dr_si:dkey-238o14.9;Xt_LOC100497179-like	Dr_si:dkey-238o14.9;Xt_znf281	0	0.365165	0.365165	Eukaryota	Dr_Endoderm;Dr_Involuting marginal zone;Dr_Neuroectoderm;Dr_Non-neural ectoderm	Xt_Endoderm;Xt_Involuting marginal zone;Xt_Neuroectoderm;Xt_Non-neural ectoderm
Dr_si:dkey-238o14.9;Xt_znf250	Dr_si:dkey-238o14.9;Xt_znf281	0	0.365165	0.365165	Eukaryota	Dr_Endoderm;Dr_Involuting marginal zone;Dr_Neuroectoderm;Dr_Non-neural ectoderm	Xt_Endoderm;Xt_Involuting marginal zone;Xt_Neuroectoderm;Xt_Non-neural ectoderm
Dr_si:dkey-238o14.9;Xt_LOC100493966	Dr_si:dkey-238o14.9;Xt_znf281	0	0.365165	0.365165	Eukaryota	Dr_Endoderm;Dr_Involuting marginal zone;Dr_Neuroectoderm;Dr_Non-neural ectoderm	Xt_Endoderm;Xt_Involuting marginal zone;Xt_Neuroectoderm;Xt_Non-neural ectoderm
Xt_znf281;Dr_LOC100005963	Xt_znf281;Dr_si:dkey-238o14.9	0	0.365165	0.365165	Eukaryota	Dr_Endoderm;Dr_Involuting marginal zone;Dr_Neuroectoderm;Dr_Non-neural ectoderm	Xt_Endoderm;Xt_Involuting marginal zone;Xt_Neuroectoderm;Xt_Non-neural ectoderm
Dr_si:dkey-238o14.9;Xt_LOC100496403-like	Dr_si:dkey-238o14.9;Xt_znf281	0	0.365165	0.365165	Eukaryota	Dr_Endoderm;Dr_Involuting marginal zone;Dr_Neuroectoderm;Dr_Non-neural ectoderm	Xt_Endoderm;Xt_Involuting marginal zone;Xt_Neuroectoderm;Xt_Non-neural ectoderm
Dr_hoxa10b;Xt_hoxa10	Dr_hoxa10b;Xt_hoxc11	0.183478	0.548456	0.364978	Eukaryota	Dr_Presomitic mesoderm;Dr_Tailbud	Xt_Presomitic mesoderm;Xt_Tailbud
Dr_zgc:113886;Xt_LOC100495499	Dr_zgc:113886;Xt_znf281	0.0608232	0.424943	0.36412	Eukaryota	Dr_Blastula	Xt_Blastula
Dr_si:dkey-238o14.9;Xt_LOC100496561	Dr_si:dkey-238o14.9;Xt_znf281	0.00140431	0.365165	0.36376	Eukaryota	Dr_Endoderm;Dr_Involuting marginal zone;Dr_Neuroectoderm;Dr_Non-neural ectoderm	Xt_Endoderm;Xt_Involuting marginal zone;Xt_Neuroectoderm;Xt_Non-neural ectoderm
Dr_zgc:174624;Xt_LOC101734394	Dr_zgc:174624;Xt_znf217	0.015279	0.378357	0.363078	Eukaryota	Dr_Blastula;Dr_Neuroectoderm;Dr_Non-neural ectoderm	Xt_Blastula;Xt_Neuroectoderm;Xt_Non-neural ectoderm
Dr_gb:am422109;Xt_LOC100496403-like	Dr_gb:am422109;Xt_znf217	0.0363686	0.399207	0.362838	Eukaryota	Dr_Blastula;Dr_Neuroectoderm;Dr_Non-neural ectoderm	Xt_Blastula;Xt_Neuroectoderm;Xt_Non-neural ectoderm
Xt_LOC100486063;Dr_col6a6	Xt_LOC100486063;Dr_col5a3b	0	0.362731	0.362731	Eukaryota	Dr_Epidermal progenitor;Dr_Placodal area	Xt_Epidermal progenitor;Xt_Placodal area
Xt_LOC100486063;Dr_LOC100535278	Xt_LOC100486063;Dr_col5a3b	0	0.362731	0.362731	Eukaryota	Dr_Epidermal progenitor;Dr_Placodal area	Xt_Epidermal progenitor;Xt_Placodal area
Dr_zgc:171551;Xt_znf383	Dr_zgc:171551;Xt_ctcf	0.0207115	0.382989	0.362277	Eukaryota	Dr_Involuting marginal zone;Dr_Neuroectoderm;Dr_Non-neural ectoderm;Dr_Notochord	Xt_Involuting marginal zone;Xt_Neuroectoderm;Xt_Non-neural ectoderm;Xt_Spemann organizer
Dr_si:dkey-20l4.2;Xt_Xetrov90029323m	Dr_si:dkey-20l4.2;Xt_wiz-like	0	0.362039	0.362039	Eukaryota	Dr_Blastula	Xt_Blastula
Dr_si:dkey-20l4.2;Xt_LOC100495499	Dr_si:dkey-20l4.2;Xt_wiz-like	0	0.362039	0.362039	Eukaryota	Dr_Blastula	Xt_Blastula
Dr_si:dkey-20l4.2;Xt_Xetrov90008367m	Dr_si:dkey-20l4.2;Xt_wiz-like	0	0.362039	0.362039	Eukaryota	Dr_Blastula	Xt_Blastula
Dr_si:dkey-20l4.2;Xt_LOC101735121-like	Dr_si:dkey-20l4.2;Xt_wiz-like	0	0.362039	0.362039	Eukaryota	Dr_Blastula	Xt_Blastula
Dr_si:dkey-20l4.2;Xt_LOC100496561	Dr_si:dkey-20l4.2;Xt_wiz-like	0	0.362039	0.362039	Eukaryota	Dr_Blastula	Xt_Blastula
Dr_si:dkey-20l4.2;Xt_LOC100497179-like	Dr_si:dkey-20l4.2;Xt_wiz-like	0	0.362039	0.362039	Eukaryota	Dr_Blastula	Xt_Blastula
Dr_si:dkey-20l4.2;Xt_Xetrov90015421m	Dr_si:dkey-20l4.2;Xt_wiz-like	0	0.362039	0.362039	Eukaryota	Dr_Blastula	Xt_Blastula
Dr_si:dkey-20l4.2;Xt_LOC100496403-like	Dr_si:dkey-20l4.2;Xt_wiz-like	0	0.362039	0.362039	Eukaryota	Dr_Blastula	Xt_Blastula
Dr_si:dkey-20l4.2;Xt_Xetrov90015419m	Dr_si:dkey-20l4.2;Xt_wiz-like	0	0.362039	0.362039	Eukaryota	Dr_Blastula	Xt_Blastula
Dr_si:dkey-20l4.2;Xt_LOC100493966	Dr_si:dkey-20l4.2;Xt_wiz-like	0	0.362039	0.362039	Eukaryota	Dr_Blastula	Xt_Blastula
Dr_si:dkey-20l4.2;Xt_znf383	Dr_si:dkey-20l4.2;Xt_wiz-like	0	0.362039	0.362039	Eukaryota	Dr_Blastula	Xt_Blastula
Dr_si:dkey-20l4.2;Xt_znf329	Dr_si:dkey-20l4.2;Xt_wiz-like	0	0.362039	0.362039	Eukaryota	Dr_Blastula	Xt_Blastula
Dr_si:dkey-20l4.2;Xt_LOC101734394	Dr_si:dkey-20l4.2;Xt_wiz-like	0	0.362039	0.362039	Eukaryota	Dr_Blastula	Xt_Blastula
Dr_si:dkey-20l4.2;Xt_Xetrov90001667m	Dr_si:dkey-20l4.2;Xt_wiz-like	0	0.362039	0.362039	Eukaryota	Dr_Blastula	Xt_Blastula
Dr_si:dkey-20l4.2;Xt_znf250	Dr_si:dkey-20l4.2;Xt_wiz-like	0	0.362039	0.362039	Eukaryota	Dr_Blastula	Xt_Blastula
Xt_sox9;Dr_sox9b	Xt_sox9;Dr_sox10	0	0.361968	0.361968	Eukaryota	Dr_Neural crest;Dr_Otic placode	Xt_Neural crest;Xt_Otic placode
Xt_sox9;Dr_sox9a	Xt_sox9;Dr_sox10	0	0.361968	0.361968	Eukaryota	Dr_Neural crest;Dr_Otic placode	Xt_Neural crest;Xt_Otic placode
Dr_alx4a;Xt_alx4	Dr_alx4a;Xt_sebox	0	0.361745	0.361745	Eukaryota	Dr_Dorsal organizer;Dr_Intermediate mesoderm;Dr_Involuting marginal zone;Dr_Notochord	Xt_Involuting marginal zone;Xt_Spemann organizer
Xt_stx19;Dr_stx19	Xt_stx19;Dr_stx4	0	0.361273	0.361273	Eukaryota	Dr_Dorsal organizer;Dr_Neuroectoderm;Dr_Non-neural ectoderm;Dr_Notochord	Xt_Neuroectoderm;Xt_Non-neural ectoderm;Xt_Spemann organizer
Dr_LOC100330116;Xt_znf250	Dr_LOC100330116;Xt_sp5l	0	0.361259	0.361259	Eukaryota	Dr_Blastula;Dr_Dorsal organizer;Dr_Involuting marginal zone;Dr_Neuroectoderm	Xt_Blastula;Xt_Involuting marginal zone;Xt_Neuroectoderm;Xt_Spemann organizer
Dr_LOC100330116;Xt_LOC100496561	Dr_LOC100330116;Xt_sp5l	0	0.361259	0.361259	Eukaryota	Dr_Blastula;Dr_Dorsal organizer;Dr_Involuting marginal zone;Dr_Neuroectoderm	Xt_Blastula;Xt_Involuting marginal zone;Xt_Neuroectoderm;Xt_Spemann organizer
Dr_LOC100330116;Xt_Xetrov90001667m	Dr_LOC100330116;Xt_sp5l	0	0.361259	0.361259	Eukaryota	Dr_Blastula;Dr_Dorsal organizer;Dr_Involuting marginal zone;Dr_Neuroectoderm	Xt_Blastula;Xt_Involuting marginal zone;Xt_Neuroectoderm;Xt_Spemann organizer
Dr_LOC100330116;Xt_LOC100493966	Dr_LOC100330116;Xt_sp5l	0	0.361259	0.361259	Eukaryota	Dr_Blastula;Dr_Dorsal organizer;Dr_Involuting marginal zone;Dr_Neuroectoderm	Xt_Blastula;Xt_Involuting marginal zone;Xt_Neuroectoderm;Xt_Spemann organizer
Dr_LOC100330116;Xt_LOC101735121-like	Dr_LOC100330116;Xt_sp5l	0	0.361259	0.361259	Eukaryota	Dr_Blastula;Dr_Dorsal organizer;Dr_Involuting marginal zone;Dr_Neuroectoderm	Xt_Blastula;Xt_Involuting marginal zone;Xt_Neuroectoderm;Xt_Spemann organizer
Dr_LOC100330116;Xt_LOC101734394	Dr_LOC100330116;Xt_sp5l	0	0.361259	0.361259	Eukaryota	Dr_Blastula;Dr_Dorsal organizer;Dr_Involuting marginal zone;Dr_Neuroectoderm	Xt_Blastula;Xt_Involuting marginal zone;Xt_Neuroectoderm;Xt_Spemann organizer
Dr_LOC100330116;Xt_znf329	Dr_LOC100330116;Xt_sp5l	0	0.361259	0.361259	Eukaryota	Dr_Blastula;Dr_Dorsal organizer;Dr_Involuting marginal zone;Dr_Neuroectoderm	Xt_Blastula;Xt_Involuting marginal zone;Xt_Neuroectoderm;Xt_Spemann organizer
Dr_hoxa13a;Xt_hoxa13	Dr_hoxa13a;Xt_hoxc11	0	0.360985	0.360985	Eukaryota	Dr_Presomitic mesoderm	Xt_Presomitic mesoderm;Xt_Tailbud
Dr_si:dkey-57k17.1;Xt_Xetrov90015419m	Dr_si:dkey-57k17.1;Xt_znf281	0.0480457	0.408622	0.360576	Eukaryota	Dr_Involuting marginal zone;Dr_Neuroectoderm;Dr_Non-neural ectoderm	Xt_Involuting marginal zone;Xt_Neuroectoderm;Xt_Non-neural ectoderm
Xt_onecut1;Dr_LOC100536103	Xt_onecut1;Dr_onecutl	0	0.359809	0.359809	Eukaryota
Dr_znf1137;Xt_LOC100496561	Dr_znf1137;Xt_bcl6	0.00565628	0.365453	0.359797	Eukaryota	Dr_Blastula	Xt_Blastula
Xt_hba-l5;Dr_si:xx-by187g17.1	Xt_hba-l5;Dr_zgc:163057	0.405273	0.765059	0.359786	Eukaryota	Dr_Blood	Xt_Blood
Dr_si:dkey-238o14.9;Xt_LOC101734394	Dr_si:dkey-238o14.9;Xt_sp5l	0.0210317	0.380414	0.359382	Eukaryota	Dr_Endoderm;Dr_Involuting marginal zone;Dr_Neuroectoderm;Dr_Tailbud	Xt_Endoderm;Xt_Involuting marginal zone;Xt_Neuroectoderm;Xt_Tailbud
Xt_hbz;Dr_hbz	Xt_hbz;Dr_hbbe2	0.425578	0.784656	0.359078	Eukaryota	Dr_Blood	Xt_Blood
Dr_pkp1b;Xt_pkp1	Dr_pkp1b;Xt_pkp3	0	0.359028	0.359028	Eukaryota	Dr_Hatching gland;Dr_Ionocyte;Dr_Rare epidermal subtypes	Xt_Goblet cell;Xt_Hatching gland;Xt_Ionocyte;Xt_Small secretory cells
Xt_pkp3;Dr_LOC100330353	Xt_pkp3;Dr_pkp1b	0	0.359028	0.359028	Eukaryota	Dr_Hatching gland;Dr_Ionocyte;Dr_Rare epidermal subtypes	Xt_Goblet cell;Xt_Hatching gland;Xt_Ionocyte;Xt_Small secretory cells
Xt_sash3;Dr_sash3	Xt_sash3;Dr_samsn1b	0	0.358975	0.358975	Eukaryota
Dr_samsn1b;Xt_samsn1	Dr_samsn1b;Xt_sash3	0	0.358975	0.358975	Eukaryota
Dr_hbae1;Xt_hba4	Dr_hbae1;Xt_hbd	0.454242	0.813204	0.358962	Eukaryota	Dr_Blood	Xt_Blood
Dr_si:dkey-57k17.1;Xt_Xetrov90029323m	Dr_si:dkey-57k17.1;Xt_znf281	0.0497615	0.408622	0.35886	Eukaryota	Dr_Involuting marginal zone;Dr_Neuroectoderm;Dr_Non-neural ectoderm	Xt_Involuting marginal zone;Xt_Neuroectoderm;Xt_Non-neural ectoderm
Xt_LOC100487093-like;Dr_si:ch211-197n1.2	Xt_LOC100487093-like;Dr_LOC103909842	0	0.35877	0.35877	Eukaryota
Dr_si:dkey-57k17.1;Xt_Xetrov90008367m	Dr_si:dkey-57k17.1;Xt_znf281	0.0498584	0.408622	0.358763	Eukaryota	Dr_Involuting marginal zone;Dr_Neuroectoderm;Dr_Non-neural ectoderm	Xt_Involuting marginal zone;Xt_Neuroectoderm;Xt_Non-neural ectoderm
Dr_gb:am422109;Xt_znf383	Dr_gb:am422109;Xt_znf217	0.0408303	0.399207	0.358377	Eukaryota	Dr_Blastula;Dr_Neuroectoderm;Dr_Non-neural ectoderm	Xt_Blastula;Xt_Neuroectoderm;Xt_Non-neural ectoderm
Xt_zbtb10;Dr_zbtb10	Xt_zbtb10;Dr_si:rp71-1g18.1	0.0152839	0.373363	0.358079	Eukaryota	Dr_Blastula;Dr_Neuroectoderm	Xt_Blastula;Xt_Non-neural ectoderm
Dr_LOC100330116;Xt_LOC100496403-like	Dr_LOC100330116;Xt_sp5l	0.00376473	0.361259	0.357494	Eukaryota	Dr_Blastula;Dr_Dorsal organizer;Dr_Involuting marginal zone;Dr_Neuroectoderm	Xt_Blastula;Xt_Involuting marginal zone;Xt_Neuroectoderm;Xt_Spemann organizer
Dr_zgc:174624;Xt_LOC100496403-like	Dr_zgc:174624;Xt_znf217	0.0211449	0.378357	0.357212	Eukaryota	Dr_Blastula;Dr_Neuroectoderm;Dr_Non-neural ectoderm	Xt_Blastula;Xt_Neuroectoderm;Xt_Non-neural ectoderm
Dr_si:dkey-238o14.9;Xt_LOC101735121-like	Dr_si:dkey-238o14.9;Xt_sp5l	0.0232382	0.380414	0.357176	Eukaryota	Dr_Endoderm;Dr_Involuting marginal zone;Dr_Neuroectoderm;Dr_Tailbud	Xt_Endoderm;Xt_Involuting marginal zone;Xt_Neuroectoderm;Xt_Tailbud
Xt_hbz;Dr_hbz	Xt_hbz;Dr_hbbe1.1	0.425578	0.782569	0.356991	Eukaryota	Dr_Blood	Xt_Blood
Dr_tagln2;Xt_tagln	Dr_tagln2;Xt_cnn1	0	0.356712	0.356712	Eukaryota	Dr_Endothelial;Dr_Epidermal progenitor;Dr_Ionocyte;Dr_Non-neural ectoderm;Dr_Notoplate;Dr_Placodal area;Dr_Rare epidermal subtypes	Xt_Endothelial;Xt_Epidermal progenitor;Xt_Goblet cell;Xt_Ionocyte;Xt_Non-neural ectoderm;Xt_Notoplate;Xt_Placodal area
Dr_hoxc9a;Xt_hoxc9	Dr_hoxc9a;Xt_hoxc11	0.145358	0.50199	0.356631	Eukaryota	Dr_Presomitic mesoderm;Dr_Tailbud	Xt_Presomitic mesoderm;Xt_Tailbud
Xt_meox2;Dr_meox2	Xt_meox2;Dr_hoxc6b	0	0.355983	0.355983	Eukaryota	Dr_Presomitic mesoderm	Xt_Presomitic mesoderm
Xt_zic1;Dr_LOC103910057	Xt_zic1;Dr_zgc:153115	0	0.355681	0.355681	Eukaryota	Dr_Neuroectoderm;Dr_Tailbud	Xt_Hindbrain;Xt_Neuroectoderm
Dr_ube2na;Xt_ube2n	Dr_ube2na;Xt_ube2e3	0	0.35554	0.35554	Eukaryota
Xt_ube2e3;Dr_ube2e2	Xt_ube2e3;Dr_ube2na	0	0.35554	0.35554	Eukaryota
Dr_sumo3a;Xt_sumo2	Dr_sumo3a;Xt_sumo1	0.1266	0.481988	0.355388	Eukaryota	Dr_Dorsal organizer;Dr_Endoderm;Dr_Involuting marginal zone;Dr_Neuroectoderm;Dr_Non-neural ectoderm;Dr_Notochord;Dr_Tailbud	Xt_Endoderm;Xt_Hindbrain;Xt_Involuting marginal zone;Xt_Neuroectoderm;Xt_Non-neural ectoderm;Xt_Spemann organizer;Xt_Tailbud
Xt_rap2c;Dr_rap2ab	Xt_rap2c;Dr_rras	0	0.355013	0.355013	Eukaryota
Dr_LOC103908654;Xt_Xetrov90029323m	Dr_LOC103908654;Xt_znf518b	0.016767	0.371628	0.354861	Eukaryota	Dr_Blastula;Dr_Involuting marginal zone	Xt_Blastula;Xt_Involuting marginal zone
Xt_rala;Dr_ralaa	Xt_rala;Dr_rras	0	0.354853	0.354853	Eukaryota
Xt_rala;Dr_ralab	Xt_rala;Dr_rras	0	0.354853	0.354853	Eukaryota
Dr_znf1137;Xt_LOC101735121-like	Dr_znf1137;Xt_bcl6	0.0108699	0.365453	0.354584	Eukaryota	Dr_Blastula	Xt_Blastula
Dr_si:ch211-208m1.2;Xt_klf8	Dr_si:ch211-208m1.2;Xt_sp3	0.0199356	0.374227	0.354291	Eukaryota
Dr_LOC100330116;Xt_Xetrov90029323m	Dr_LOC100330116;Xt_sp5l	0.00699935	0.361259	0.35426	Eukaryota	Dr_Blastula;Dr_Dorsal organizer;Dr_Involuting marginal zone;Dr_Neuroectoderm	Xt_Blastula;Xt_Involuting marginal zone;Xt_Neuroectoderm;Xt_Spemann organizer
Dr_zgc:173703;Xt_LOC100497179-like	Dr_zgc:173703;Xt_znf518b	0.0520524	0.406179	0.354126	Eukaryota	Dr_Blastula	Xt_Blastula
Xt_rap2c;Dr_rap2ab	Xt_rap2c;Dr_nras	0	0.354052	0.354052	Eukaryota
Xt_wiz-like;Dr_si:ch211-194b1.1	Xt_wiz-like;Dr_si:dkey-20l4.2	0.00820496	0.362039	0.353834	Eukaryota	Dr_Blastula	Xt_Blastula
Xt_fzd8;Dr_fzd5	Xt_fzd8;Dr_frzb	0	0.353015	0.353015	Eukaryota	Dr_Dorsal organizer;Dr_Notochord	Xt_Spemann organizer
Dr_frzb;Xt_sfrp4	Dr_frzb;Xt_fzd8	0	0.353015	0.353015	Eukaryota	Dr_Dorsal organizer;Dr_Notochord	Xt_Spemann organizer
Dr_zgc:173703;Xt_LOC100497179-like	Dr_zgc:173703;Xt_znf281	0.0520524	0.404482	0.35243	Eukaryota	Dr_Blastula;Dr_Neuroectoderm	Xt_Blastula;Xt_Neuroectoderm;Xt_Non-neural ectoderm
Dr_vdac3;Xt_vdac3	Dr_vdac3;Xt_vdac1	0.0727722	0.425174	0.352402	Eukaryota	Dr_Neuron;Dr_Optic;Dr_Presomitic mesoderm;Dr_Rohon-beard neuron;Dr_Skeletal muscle	Xt_Neuron;Xt_Optic;Xt_Rohon-beard neuron;Xt_Skeletal muscle
Dr_hoxc13b;Xt_hoxc13	Dr_hoxc13b;Xt_hoxc10	0.225133	0.577513	0.352379	Eukaryota	Dr_Presomitic mesoderm	Xt_Presomitic mesoderm;Xt_Skeletal muscle;Xt_Tailbud
Dr_hoxc9a;Xt_hoxc9	Dr_hoxc9a;Xt_hoxd11	0.145358	0.497485	0.352127	Eukaryota	Dr_Presomitic mesoderm;Dr_Tailbud	Xt_Presomitic mesoderm;Xt_Tailbud
Dr_si:xx-by187g17.1;Xt_hba-l4	Dr_si:xx-by187g17.1;Xt_hbd	0.0264801	0.378529	0.352049	Eukaryota
Xt_cygb;Dr_cygb2	Xt_cygb;Dr_si:ch211-5k11.2	0	0.351424	0.351424	Eukaryota	Dr_Blood	Xt_Blood
Dr_LOC103909555;Xt_LOC101731491	Dr_LOC103909555;Xt_fgl2	0	0.351223	0.351223	Eukaryota
Xt_fgl2;Dr_si:ch211-236c15.2	Xt_fgl2;Dr_LOC103909555	0	0.351223	0.351223	Eukaryota
Dr_LOC103909555;Xt_LOC100488644	Dr_LOC103909555;Xt_fgl2	0	0.351223	0.351223	Eukaryota
Xt_fgl2;Dr_fgl2a	Xt_fgl2;Dr_LOC103909555	0	0.351223	0.351223	Eukaryota
Dr_LOC103909555;Xt_LOC100488329	Dr_LOC103909555;Xt_fgl2	0	0.351223	0.351223	Eukaryota
Xt_hba-l2;Dr_hbz	Xt_hba-l2;Dr_hbbe3	0.347894	0.699084	0.351189	Eukaryota	Dr_Blood	Xt_Blood
Dr_foxd5;Xt_foxd4l1.2	Dr_foxd5;Xt_foxi4.2	0	0.350936	0.350936	Eukaryota	Dr_Neuroectoderm;Dr_Non-neural ectoderm	Xt_Neuroectoderm;Xt_Non-neural ectoderm
Xt_col6a1;Dr_col6a1	Xt_col6a1;Dr_col5a1	0	0.35087	0.35087	Eukaryota	Dr_Epidermal progenitor;Dr_Placodal area	Xt_Epidermal progenitor
Dr_si:dkey-238o14.9;Xt_LOC100495499	Dr_si:dkey-238o14.9;Xt_sp5l	0.0296847	0.380414	0.350729	Eukaryota	Dr_Endoderm;Dr_Involuting marginal zone;Dr_Neuroectoderm;Dr_Tailbud	Xt_Endoderm;Xt_Involuting marginal zone;Xt_Neuroectoderm;Xt_Tailbud
Dr_znf1137;Xt_znf383	Dr_znf1137;Xt_sp1	0.0917356	0.441441	0.349705	Eukaryota
Dr_znf1137;Xt_Xetrov90001667m	Dr_znf1137;Xt_bcl6	0.0158436	0.365453	0.34961	Eukaryota	Dr_Blastula	Xt_Blastula
Dr_gb:am422109;Xt_LOC100493966	Dr_gb:am422109;Xt_sp5l	0	0.349435	0.349435	Eukaryota	Dr_Blastula;Dr_Involuting marginal zone;Dr_Neuroectoderm	Xt_Blastula;Xt_Involuting marginal zone;Xt_Neuroectoderm
Dr_gb:am422109;Xt_znf329	Dr_gb:am422109;Xt_sp5l	0	0.349435	0.349435	Eukaryota	Dr_Blastula;Dr_Involuting marginal zone;Dr_Neuroectoderm	Xt_Blastula;Xt_Involuting marginal zone;Xt_Neuroectoderm
Dr_gb:am422109;Xt_LOC100496561	Dr_gb:am422109;Xt_sp5l	0	0.349435	0.349435	Eukaryota	Dr_Blastula;Dr_Involuting marginal zone;Dr_Neuroectoderm	Xt_Blastula;Xt_Involuting marginal zone;Xt_Neuroectoderm
Dr_gb:am422109;Xt_LOC101735121-like	Dr_gb:am422109;Xt_sp5l	0	0.349435	0.349435	Eukaryota	Dr_Blastula;Dr_Involuting marginal zone;Dr_Neuroectoderm	Xt_Blastula;Xt_Involuting marginal zone;Xt_Neuroectoderm
Dr_gb:am422109;Xt_LOC101734394	Dr_gb:am422109;Xt_sp5l	0	0.349435	0.349435	Eukaryota	Dr_Blastula;Dr_Involuting marginal zone;Dr_Neuroectoderm	Xt_Blastula;Xt_Involuting marginal zone;Xt_Neuroectoderm
Dr_gb:am422109;Xt_znf250	Dr_gb:am422109;Xt_sp5l	0	0.349435	0.349435	Eukaryota	Dr_Blastula;Dr_Involuting marginal zone;Dr_Neuroectoderm	Xt_Blastula;Xt_Involuting marginal zone;Xt_Neuroectoderm
Dr_gb:am422109;Xt_Xetrov90001667m	Dr_gb:am422109;Xt_sp5l	0	0.349435	0.349435	Eukaryota	Dr_Blastula;Dr_Involuting marginal zone;Dr_Neuroectoderm	Xt_Blastula;Xt_Involuting marginal zone;Xt_Neuroectoderm
Xt_cygb;Dr_cygb2	Xt_cygb;Dr_LOC100334599	0	0.349283	0.349283	Eukaryota	Dr_Blood	Xt_Blood
Dr_LOC100330116;Xt_LOC100497179-like	Dr_LOC100330116;Xt_sp5l	0.0120257	0.361259	0.349233	Eukaryota	Dr_Blastula;Dr_Dorsal organizer;Dr_Involuting marginal zone;Dr_Neuroectoderm	Xt_Blastula;Xt_Involuting marginal zone;Xt_Neuroectoderm;Xt_Spemann organizer
Dr_LOC100330116;Xt_znf383	Dr_LOC100330116;Xt_sp5l	0.0127809	0.361259	0.348478	Eukaryota	Dr_Blastula;Dr_Dorsal organizer;Dr_Involuting marginal zone;Dr_Neuroectoderm	Xt_Blastula;Xt_Involuting marginal zone;Xt_Neuroectoderm;Xt_Spemann organizer
Dr_fzd8a;Xt_fzd5	Dr_fzd8a;Xt_frzb2	0	0.348357	0.348357	Eukaryota	Dr_Dorsal organizer;Dr_Endoderm;Dr_Forebrain/midbrain;Dr_Intermediate mesoderm	Xt_Endoderm;Xt_Endothelial;Xt_Pronephric mesenchyme;Xt_Spemann organizer
Xt_frzb2;Dr_LOC101884738	Xt_frzb2;Dr_fzd8a	0	0.348357	0.348357	Eukaryota	Dr_Dorsal organizer;Dr_Endoderm;Dr_Forebrain/midbrain;Dr_Intermediate mesoderm	Xt_Endoderm;Xt_Endothelial;Xt_Pronephric mesenchyme;Xt_Spemann organizer
Dr_cxcr3.2;Xt_cxcr3	Dr_cxcr3.2;Xt_gpr65	0.0488739	0.397083	0.348209	Eukaryota
Xt_hba1;Dr_hbz	Xt_hba1;Dr_MGC173646	0.2494	0.59729	0.34789	Eukaryota	Dr_Blood	Xt_Blood
Dr_foxd1;Xt_foxd2	Dr_foxd1;Xt_foxd1	0	0.347695	0.347695	Eukaryota	Dr_Intermediate mesoderm	Xt_Endothelial
Dr_si:dkey-57k17.1;Xt_Xetrov90001667m	Dr_si:dkey-57k17.1;Xt_sp5l	0	0.347692	0.347692	Eukaryota	Dr_Involuting marginal zone;Dr_Neuroectoderm	Xt_Involuting marginal zone;Xt_Neuroectoderm
Dr_si:dkey-57k17.1;Xt_znf329	Dr_si:dkey-57k17.1;Xt_sp5l	0	0.347692	0.347692	Eukaryota	Dr_Involuting marginal zone;Dr_Neuroectoderm	Xt_Involuting marginal zone;Xt_Neuroectoderm
Dr_si:dkey-57k17.1;Xt_LOC100493966	Dr_si:dkey-57k17.1;Xt_sp5l	0	0.347692	0.347692	Eukaryota	Dr_Involuting marginal zone;Dr_Neuroectoderm	Xt_Involuting marginal zone;Xt_Neuroectoderm
Dr_si:dkey-57k17.1;Xt_LOC101735121-like	Dr_si:dkey-57k17.1;Xt_sp5l	0	0.347692	0.347692	Eukaryota	Dr_Involuting marginal zone;Dr_Neuroectoderm	Xt_Involuting marginal zone;Xt_Neuroectoderm
Dr_si:dkey-57k17.1;Xt_znf383	Dr_si:dkey-57k17.1;Xt_znf281	0.060951	0.408622	0.347671	Eukaryota	Dr_Involuting marginal zone;Dr_Neuroectoderm;Dr_Non-neural ectoderm	Xt_Involuting marginal zone;Xt_Neuroectoderm;Xt_Non-neural ectoderm
Dr_LOC103908654;Xt_LOC100497179-like	Dr_LOC103908654;Xt_zfat	0.0608449	0.408338	0.347493	Eukaryota	Dr_Blastula;Dr_Involuting marginal zone;Dr_Neuroectoderm;Dr_Non-neural ectoderm	Xt_Blastula;Xt_Involuting marginal zone;Xt_Neuroectoderm;Xt_Non-neural ectoderm
Dr_zgc:174275;Xt_Xetrov90008367m	Dr_zgc:174275;Xt_sp5l	0.0885381	0.435584	0.347046	Eukaryota	Dr_Blastula;Dr_Involuting marginal zone;Dr_Neuroectoderm	Xt_Blastula;Xt_Involuting marginal zone;Xt_Neuroectoderm
Dr_fzd8a;Xt_fzd5	Dr_fzd8a;Xt_frzb	0	0.34678	0.34678	Eukaryota	Dr_Dorsal organizer;Dr_Endoderm;Dr_Intermediate mesoderm	Xt_Endoderm;Xt_Spemann organizer
Dr_si:dkey-57k17.1;Xt_LOC100495499	Dr_si:dkey-57k17.1;Xt_znf281	0.0619004	0.408622	0.346721	Eukaryota	Dr_Involuting marginal zone;Dr_Neuroectoderm;Dr_Non-neural ectoderm	Xt_Involuting marginal zone;Xt_Neuroectoderm;Xt_Non-neural ectoderm
Xt_hba-l5;Dr_hbz	Xt_hba-l5;Dr_hbbe1.1	0.461048	0.807584	0.346536	Eukaryota	Dr_Blood	Xt_Blood
Xt_hba3;Dr_hbz	Xt_hba3;Dr_zgc:163057	0.551778	0.898187	0.346409	Eukaryota	Dr_Blood	Xt_Blood
Dr_zgc:174275;Xt_Xetrov90029323m	Dr_zgc:174275;Xt_sp5l	0.0892534	0.435584	0.346331	Eukaryota	Dr_Blastula;Dr_Involuting marginal zone;Dr_Neuroectoderm	Xt_Blastula;Xt_Involuting marginal zone;Xt_Neuroectoderm
Xt_ube2e3;Dr_ube2e3	Xt_ube2e3;Dr_ube2na	0.00935975	0.35554	0.34618	Eukaryota
Dr_si:ch211-132b12.8;Xt_cntd2	Dr_si:ch211-132b12.8;Xt_ccnb2	0.336913	0.682838	0.345925	Eukaryota	Dr_Blastula	Xt_Blastula
Xt_rala;Dr_ralab	Xt_rala;Dr_nras	0	0.345861	0.345861	Eukaryota
Xt_rala;Dr_ralaa	Xt_rala;Dr_nras	0	0.345861	0.345861	Eukaryota
Xt_tspan1;Dr_LOC103911252	Xt_tspan1;Dr_cd82b	0	0.345841	0.345841	Eukaryota	Dr_Blastula	Xt_Blastula
Xt_tspan1;Dr_tspan1	Xt_tspan1;Dr_cd82b	0	0.345841	0.345841	Eukaryota	Dr_Blastula	Xt_Blastula
Xt_tspan1;Dr_tspan35	Xt_tspan1;Dr_cd82b	0	0.345841	0.345841	Eukaryota	Dr_Blastula	Xt_Blastula
Dr_si:dkeyp-87a6.1;Xt_Xetrov90014133m	Dr_si:dkeyp-87a6.1;Xt_dnah1	0.219003	0.564583	0.34558	Eukaryota
Dr_LOC103910469;Xt_LOC101734394	Dr_LOC103910469;Xt_znf281	0	0.345506	0.345506	Eukaryota	Dr_Blastula	Xt_Blastula
Dr_LOC103910469;Xt_znf250	Dr_LOC103910469;Xt_znf281	0	0.345506	0.345506	Eukaryota	Dr_Blastula	Xt_Blastula
Dr_LOC103910469;Xt_znf329	Dr_LOC103910469;Xt_znf281	0	0.345506	0.345506	Eukaryota	Dr_Blastula	Xt_Blastula
Dr_LOC103910469;Xt_Xetrov90029323m	Dr_LOC103910469;Xt_znf281	0	0.345506	0.345506	Eukaryota	Dr_Blastula	Xt_Blastula
Xt_znf281;Dr_LOC100005963	Xt_znf281;Dr_LOC103910469	0	0.345506	0.345506	Eukaryota	Dr_Blastula	Xt_Blastula
Dr_LOC103910469;Xt_LOC101735121-like	Dr_LOC103910469;Xt_znf281	0	0.345506	0.345506	Eukaryota	Dr_Blastula	Xt_Blastula
Dr_LOC103910469;Xt_Xetrov90001667m	Dr_LOC103910469;Xt_znf281	0	0.345506	0.345506	Eukaryota	Dr_Blastula	Xt_Blastula
Dr_LOC103910469;Xt_LOC100493966	Dr_LOC103910469;Xt_znf281	0	0.345506	0.345506	Eukaryota	Dr_Blastula	Xt_Blastula
Dr_LOC103910469;Xt_znf383	Dr_LOC103910469;Xt_znf281	0	0.345506	0.345506	Eukaryota	Dr_Blastula	Xt_Blastula
Dr_LOC103910469;Xt_LOC100496561	Dr_LOC103910469;Xt_znf281	0	0.345506	0.345506	Eukaryota	Dr_Blastula	Xt_Blastula
Dr_her5;Xt_LOC733709	Dr_her5;Xt_hes7.1	0	0.345395	0.345395	Eukaryota	Dr_Blastula	Xt_Blastula
Dr_her5;Xt_hes7.2	Dr_her5;Xt_hes7.1	0	0.345395	0.345395	Eukaryota	Dr_Blastula	Xt_Blastula
Xt_hes7.1;Dr_her7	Xt_hes7.1;Dr_her5	0	0.345395	0.345395	Eukaryota	Dr_Blastula	Xt_Blastula
Dr_sfrs3a;Xt_Xetrov90009871m	Dr_sfrs3a;Xt_srsf7	0	0.34539	0.34539	Eukaryota	Dr_Dorsal organizer;Dr_Endoderm;Dr_Intermediate mesoderm;Dr_Involuting marginal zone;Dr_Neuroectoderm;Dr_Non-neural ectoderm;Dr_Notochord;Dr_Tailbud	Xt_Endoderm;Xt_Hindbrain;Xt_Involuting marginal zone;Xt_Neuroectoderm;Xt_Non-neural ectoderm;Xt_Spemann organizer
Xt_srsf7;Dr_srsf7b	Xt_srsf7;Dr_sfrs3a	0	0.34539	0.34539	Eukaryota	Dr_Dorsal organizer;Dr_Endoderm;Dr_Intermediate mesoderm;Dr_Involuting marginal zone;Dr_Neuroectoderm;Dr_Non-neural ectoderm;Dr_Notochord;Dr_Tailbud	Xt_Endoderm;Xt_Hindbrain;Xt_Involuting marginal zone;Xt_Neuroectoderm;Xt_Non-neural ectoderm;Xt_Spemann organizer
Dr_sfrs3a;Xt_LOC101732133	Dr_sfrs3a;Xt_srsf7	0	0.34539	0.34539	Eukaryota	Dr_Dorsal organizer;Dr_Endoderm;Dr_Intermediate mesoderm;Dr_Involuting marginal zone;Dr_Neuroectoderm;Dr_Non-neural ectoderm;Dr_Notochord;Dr_Tailbud	Xt_Endoderm;Xt_Hindbrain;Xt_Involuting marginal zone;Xt_Neuroectoderm;Xt_Non-neural ectoderm;Xt_Spemann organizer
Xt_LOC100486063;Dr_LOC100535278	Xt_LOC100486063;Dr_col5a1	0	0.345267	0.345267	Eukaryota	Dr_Epidermal progenitor;Dr_Placodal area	Xt_Epidermal progenitor;Xt_Placodal area
Xt_LOC100486063;Dr_col6a6	Xt_LOC100486063;Dr_col5a1	0	0.345267	0.345267	Eukaryota	Dr_Epidermal progenitor;Dr_Placodal area	Xt_Epidermal progenitor;Xt_Placodal area
Dr_gb:am422109;Xt_Xetrov90008367m	Dr_gb:am422109;Xt_bcl6	0.0940096	0.439111	0.345101	Eukaryota	Dr_Blastula	Xt_Blastula
Dr_dlx6a;Xt_dlx6	Dr_dlx6a;Xt_dlx2	0	0.344933	0.344933	Eukaryota
Dr_anxa1a;Xt_anxa1-like.2	Dr_anxa1a;Xt_anxa2	0	0.34489	0.34489	Eukaryota	Dr_Epidermal progenitor;Dr_Placodal area	Xt_Epidermal progenitor;Xt_Placodal area
Dr_anxa1a;Xt_anxa8	Dr_anxa1a;Xt_anxa2	0	0.34489	0.34489	Eukaryota	Dr_Epidermal progenitor;Dr_Placodal area	Xt_Epidermal progenitor;Xt_Placodal area
Xt_hba4;Dr_si:xx-by187g17.1	Xt_hba4;Dr_hbbe3	0.159909	0.504607	0.344698	Eukaryota
Xt_hoxc4;Dr_hoxc4a	Xt_hoxc4;Dr_meox1	0	0.344595	0.344595	Eukaryota	Dr_Intermediate mesoderm;Dr_Presomitic mesoderm	Xt_Intermediate mesoderm;Xt_Presomitic mesoderm;Xt_Skeletal muscle;Xt_Tailbud
Xt_hba4;Dr_si:ch211-5k11.6	Xt_hba4;Dr_zgc:163057	0	0.34448	0.34448	Eukaryota
Dr_si:dkey-238o14.9;Xt_LOC101734394	Dr_si:dkey-238o14.9;Xt_znf281	0.0210317	0.365165	0.344133	Eukaryota	Dr_Endoderm;Dr_Involuting marginal zone;Dr_Neuroectoderm;Dr_Non-neural ectoderm	Xt_Endoderm;Xt_Involuting marginal zone;Xt_Neuroectoderm;Xt_Non-neural ectoderm
Dr_LOC103908654;Xt_LOC100496403-like	Dr_LOC103908654;Xt_znf518b	0.0275308	0.371628	0.344098	Eukaryota	Dr_Blastula;Dr_Involuting marginal zone	Xt_Blastula;Xt_Involuting marginal zone
Dr_srsf3a;Xt_Xetrov90009871m	Dr_srsf3a;Xt_srsf7	0	0.343587	0.343587	Eukaryota	Dr_Dorsal organizer;Dr_Endoderm;Dr_Intermediate mesoderm;Dr_Involuting marginal zone;Dr_Neuroectoderm;Dr_Non-neural ectoderm;Dr_Notochord;Dr_Tailbud	Xt_Endoderm;Xt_Hindbrain;Xt_Involuting marginal zone;Xt_Neuroectoderm;Xt_Non-neural ectoderm;Xt_Spemann organizer
Xt_srsf7;Dr_srsf7b	Xt_srsf7;Dr_srsf3a	0	0.343587	0.343587	Eukaryota	Dr_Dorsal organizer;Dr_Endoderm;Dr_Intermediate mesoderm;Dr_Involuting marginal zone;Dr_Neuroectoderm;Dr_Non-neural ectoderm;Dr_Notochord;Dr_Tailbud	Xt_Endoderm;Xt_Hindbrain;Xt_Involuting marginal zone;Xt_Neuroectoderm;Xt_Non-neural ectoderm;Xt_Spemann organizer
Dr_srsf3a;Xt_LOC101732133	Dr_srsf3a;Xt_srsf7	0	0.343587	0.343587	Eukaryota	Dr_Dorsal organizer;Dr_Endoderm;Dr_Intermediate mesoderm;Dr_Involuting marginal zone;Dr_Neuroectoderm;Dr_Non-neural ectoderm;Dr_Notochord;Dr_Tailbud	Xt_Endoderm;Xt_Hindbrain;Xt_Involuting marginal zone;Xt_Neuroectoderm;Xt_Non-neural ectoderm;Xt_Spemann organizer
Dr_si:dkey-238o14.9;Xt_Xetrov90015419m	Dr_si:dkey-238o14.9;Xt_sp5l	0.0369914	0.380414	0.343423	Eukaryota	Dr_Endoderm;Dr_Involuting marginal zone;Dr_Neuroectoderm;Dr_Tailbud	Xt_Endoderm;Xt_Involuting marginal zone;Xt_Neuroectoderm;Xt_Tailbud
Dr_si:dkey-57k17.1;Xt_LOC100496561	Dr_si:dkey-57k17.1;Xt_sp5l	0.00428836	0.347692	0.343404	Eukaryota	Dr_Involuting marginal zone;Dr_Neuroectoderm	Xt_Involuting marginal zone;Xt_Neuroectoderm
Dr_nkx2.2a;Xt_nkx2-2	Dr_nkx2.2a;Xt_nkx2-1	0.357602	0.70094	0.343338	Eukaryota	Dr_Forebrain/midbrain	Xt_Forebrain/midbrain
Dr_zgc:173703;Xt_LOC100495499	Dr_zgc:173703;Xt_znf518b	0.0628476	0.406179	0.343331	Eukaryota	Dr_Blastula	Xt_Blastula
[truncated: 560 more rows]
