# Supplementary material for: Mapping single-cell atlases throughout Metazoa unravels cell type evolution
Source: eLife. 2021 May 4;10:e66747. doi: 10.7554/eLife.66747 (PMC8139856; doi:10.7554/eLife.66747)
Supplement: Supplementary file 6. [file elife-66747-supp6.xlsx]

## Sheet: gene_names
	sox	klf	ssrp1	sub1	kat7
Sl	c102752-g3	c102282-g1	c101547-g1	c60684-g1	c103906-g1
Hv	t15393aep	t7220aep	t12457aep	t37634aep	t8820aep
Sm	dd_Smed_v4_7227_0_1	dd_Smed_v4_2118_0_1	dd_Smed_v4_3904_0_1	dd_Smed_v4_976_0_1	dd_Smed_v4_14326_0_1
Sa	Smp_076600	Smp_122370	Smp_148930	Smp_084620	Smp_198670
