# Supplementary material for: Mapping single-cell atlases throughout Metazoa unravels cell type evolution
Source: eLife. 2021 May 4;10:e66747. doi: 10.7554/eLife.66747 (PMC8139856; doi:10.7554/eLife.66747)
Supplement: Supplementary file 7. — For the schistosome cell types, we annotate two neural clusters, both of which express the neural marker complexin (Li et al., 2021). One of the clusters expresses the antigen SmKK7, so we label the clusters ‘Neural’ and ‘Neural_KK7’, respectively. The ‘Muscle’ population contains non-stem cells expressing troponin. The ‘Tegument_prog’ and ‘Tegument’ populations consist of cells expressing tegument progenitor and differentiated marker genes, respectively, as reported in a previous study (Wendt et al., 2018). [file elife-66747-supp7.xlsx]

## Sheet: Figure 4C Legend
	Neurons	Muscles / Contractile cells	Stem cells	Species key legend
1	Sl_Apopylar Cells	Sl_Myopeptidocytes	Sl_Archeocytes	Sl = Spongilla lacustris
2	Sl_Choanocytes	Sl_Basopinacocytes	Hv_i_SC	Hv = Hydra vulgaris
3	Hv_i_nc_gc_prog	Sl_Apendopinacocytes	Sm_Neoblast: 0	Sm = Schmidtea mediterranea
4	Hv_i_nc_prog	Sl_Incurrent Pinacocytes2	Sm_Neoblast: 5	Sa = Schistosoma mansoni
5	Hv_i_nc1	Hv_enEp_head	Sm_Neoblast: 22	Dr = Danio rerio
6	Hv_i_nc2	Hv_enEp_tent	Sa_Neoblast	Xt = Xenopus tropicalis
7	Hv_i_nc3	Hv_enEp_foot		Mm = Mus musculus
8	Hv_i_nc4	Hv_ecEp_SC2
9	Hv_i_nc5	Hv_ecEp_SC3
10	Hv_i_nc6	Hv_ecEp_head
11	Hv_i_nc7	Hv_ecEp_bat1(mp)
12	Hv_i_nem	Hv_ecEp_bat2(mp)
13	Sm_Neural: 32	Sm_Muscle: 7
14	Sm_Neural: 21	Sm_Muscle: 13
15	Sm_Neural: 1	Sm_Muscle: 14
16	Sm_Neural: 23	Sm_Muscle: 16
17	Sm_Neural: 20	Sa_Muscle
18	Sm_Neural: 9	Dr_Presomitic mesoderm
19	Sm_Neural: 8	Dr_Skeletal muscle
20	Sm_Neural: 36	Dr_Heart
21	Sm_Neural: 18	Xt_Presomitic mesoderm
22	Sm_Neural: 33	Xt_Skeletal muscle
23	Sa_Neural	Mm_Cardiomyocytes
24	Dr_Hindbrain	Mm_Somitic mesoderm
25	Dr_Forebrain/midbrain	Mm_Paraxial mesoderm
26	Dr_Neuron
27	Dr_Rohon-beard neuron
28	Xt_Notoplate
29	Xt_Forebrain/midbrain
30	Xt_Hindbrain
31	Xt_Neuron
32	Xt_Rohon-beard neuron
33	Mm_Spinal cord
34	Mm_Rostral neurectoderm
35	Mm_Forebrain/Midbrain/Hindbrain
