# Supplementary figures and images for: Mapping single-cell atlases throughout Metazoa unravels cell type evolution
Source: eLife journal article supplement (doi:10.7554/elife.66747), 2021-05-04

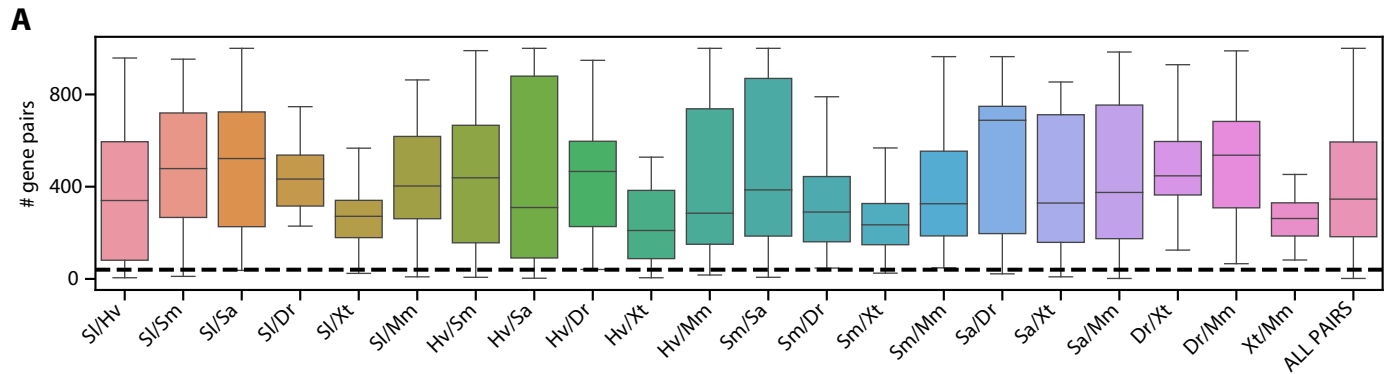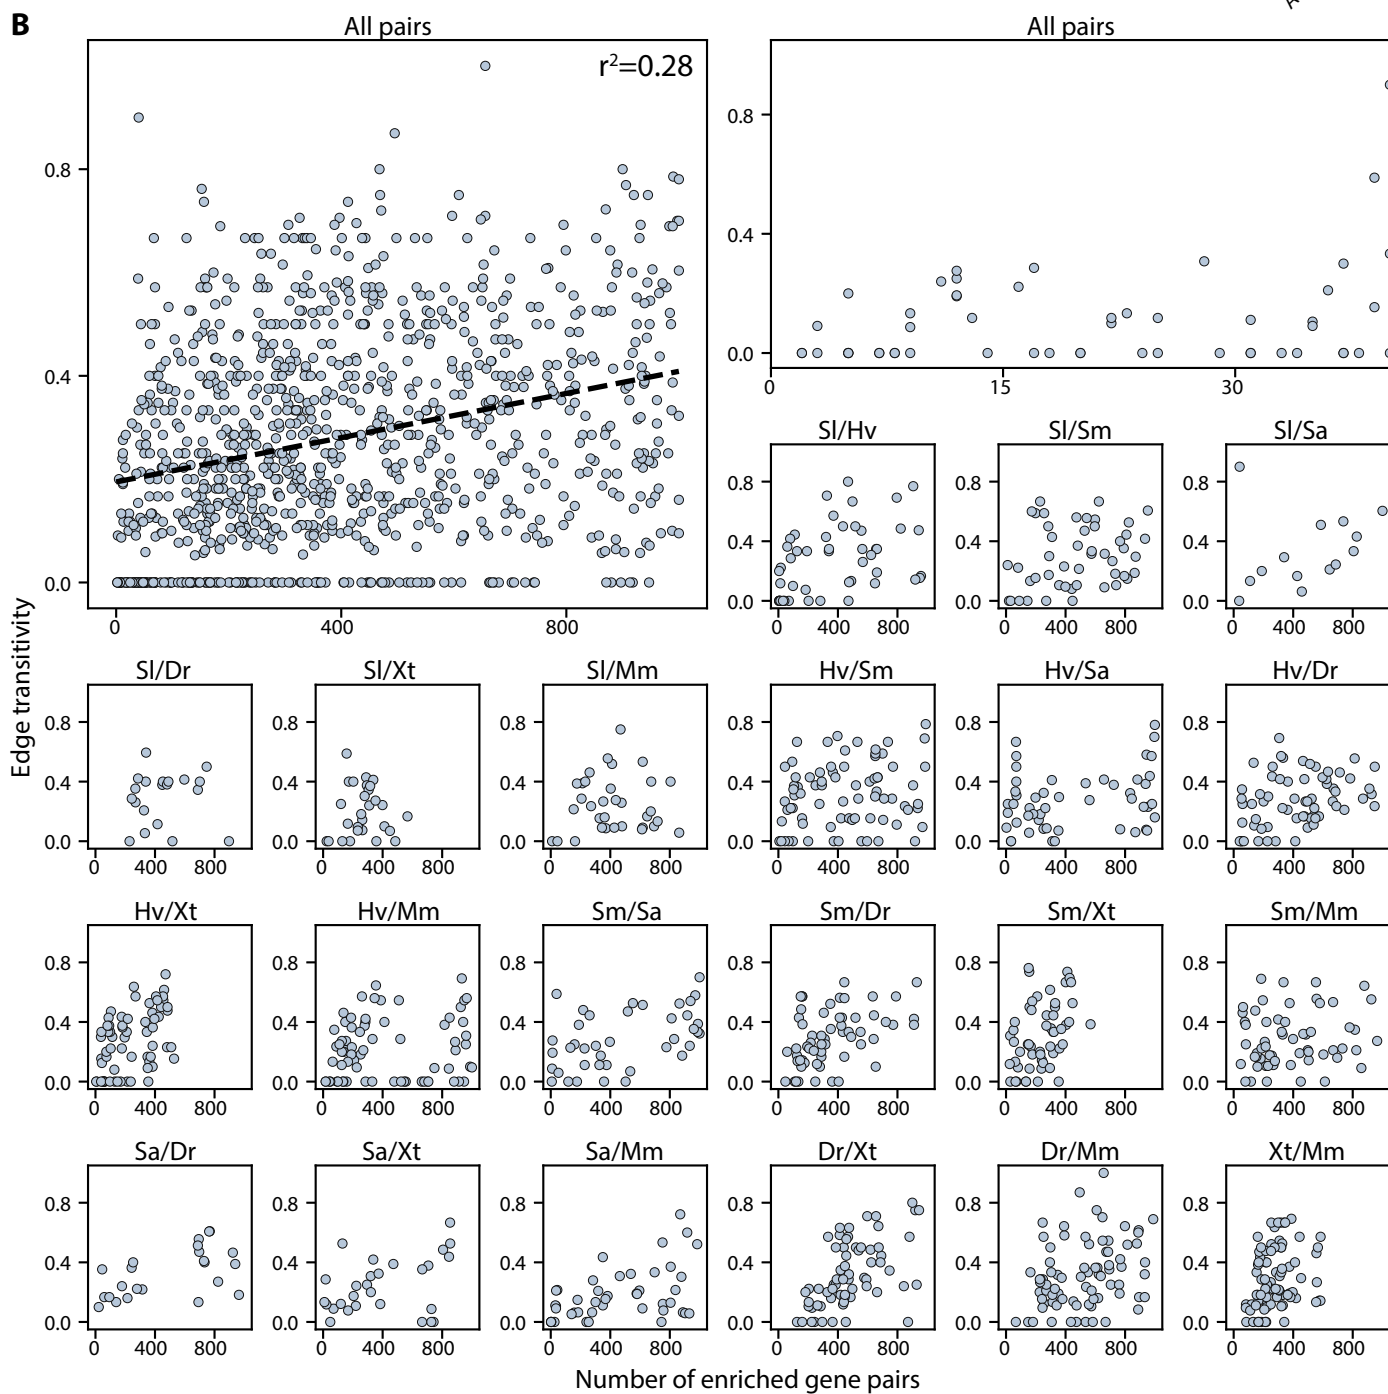

Supplement: supp [file elife-66747-supp-v1.zip]

*myod1* (Smp\_167400)

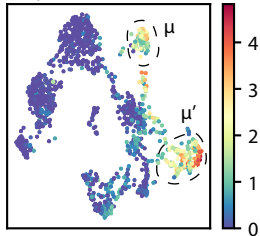

*cabp* (Smp\_340130)

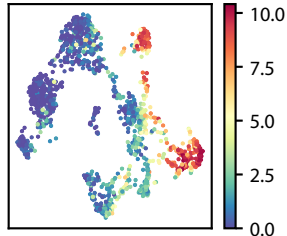

*tcf15* (Smp\_015670)

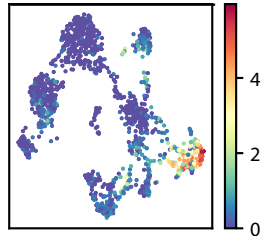

*myh* (Smp\_085540)

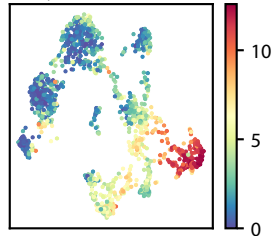

*collagen* (Smp\_343740)

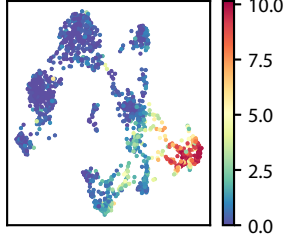

*myl* (Smp\_045220)

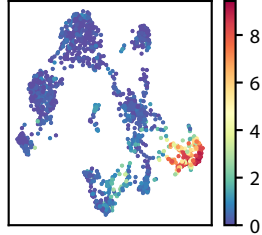

*tropomyosin* (Smp\_031770)

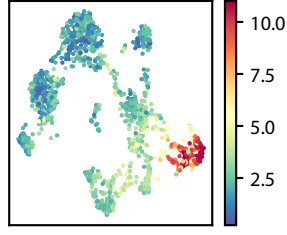

*troponin* (Smp\_018250)

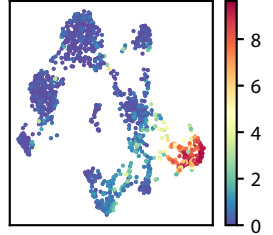

Supplement: supp [file elife-66747-supp-v1.zip]

**A**

Tree scale: 0.1

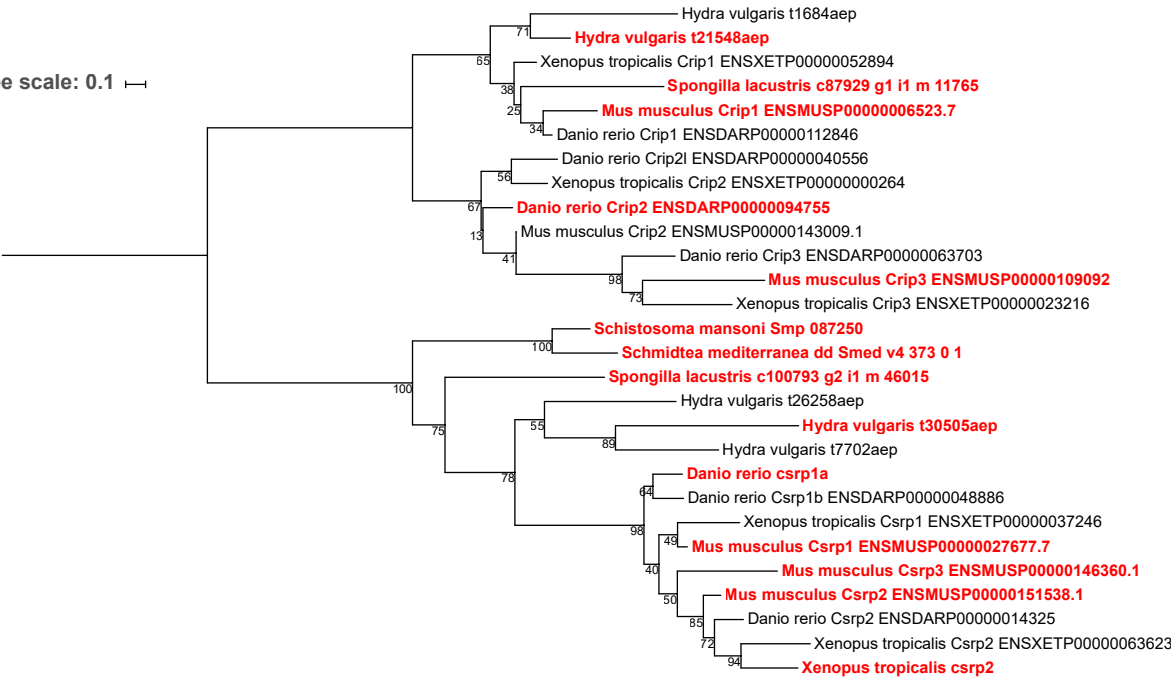

**B**

Tree scale: 0.1

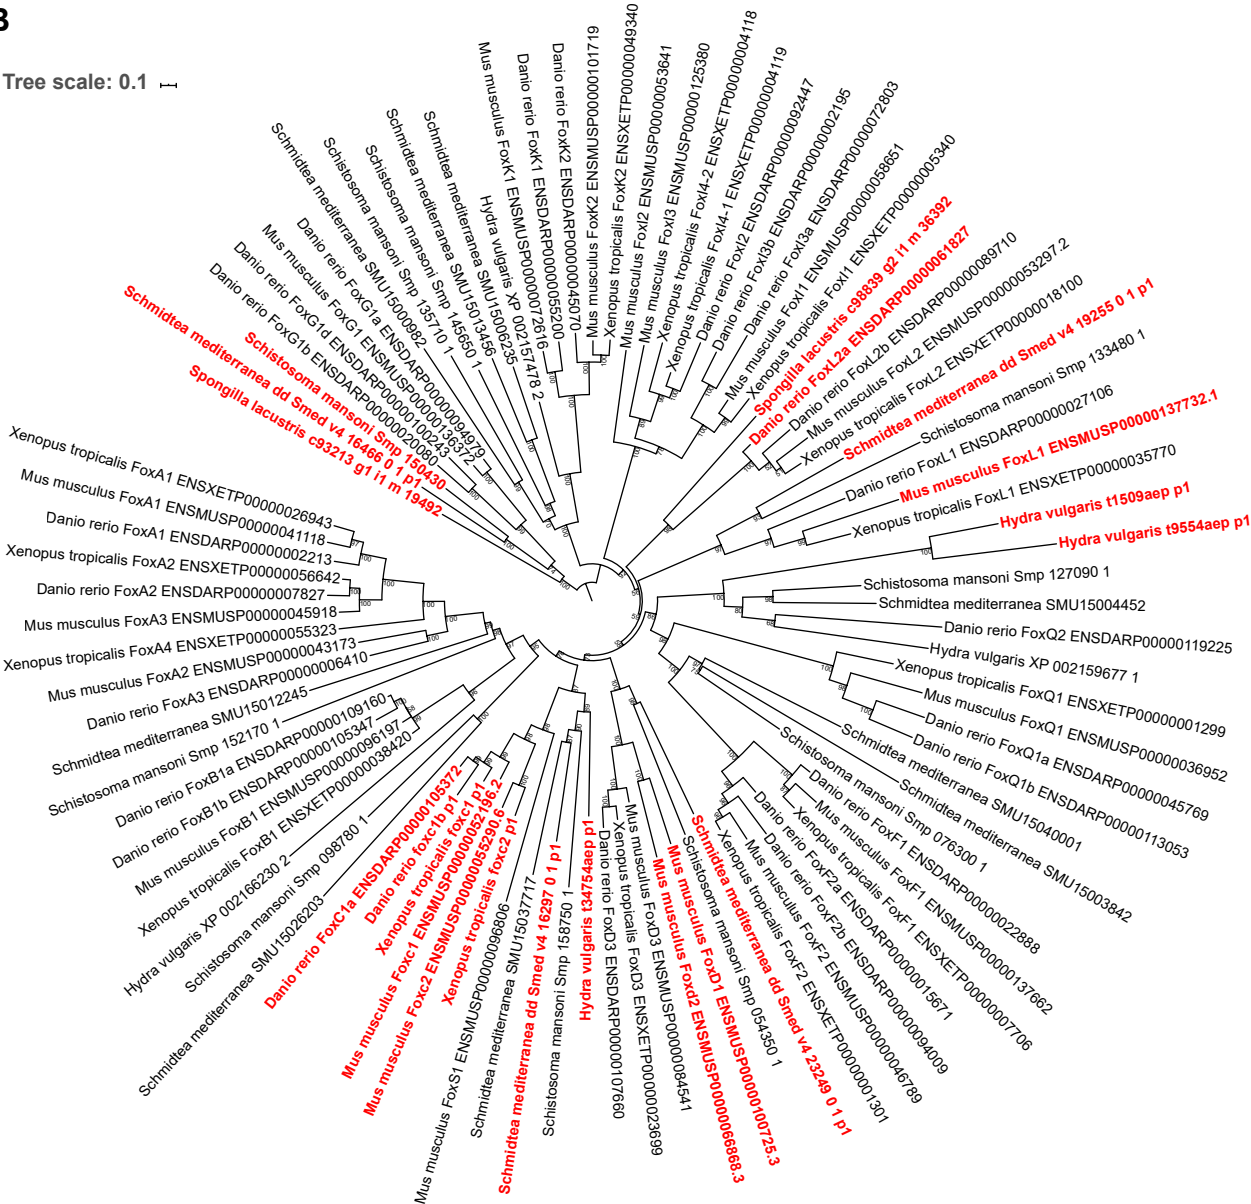

Supplement: supp [file elife-66747-supp-v1.zip]

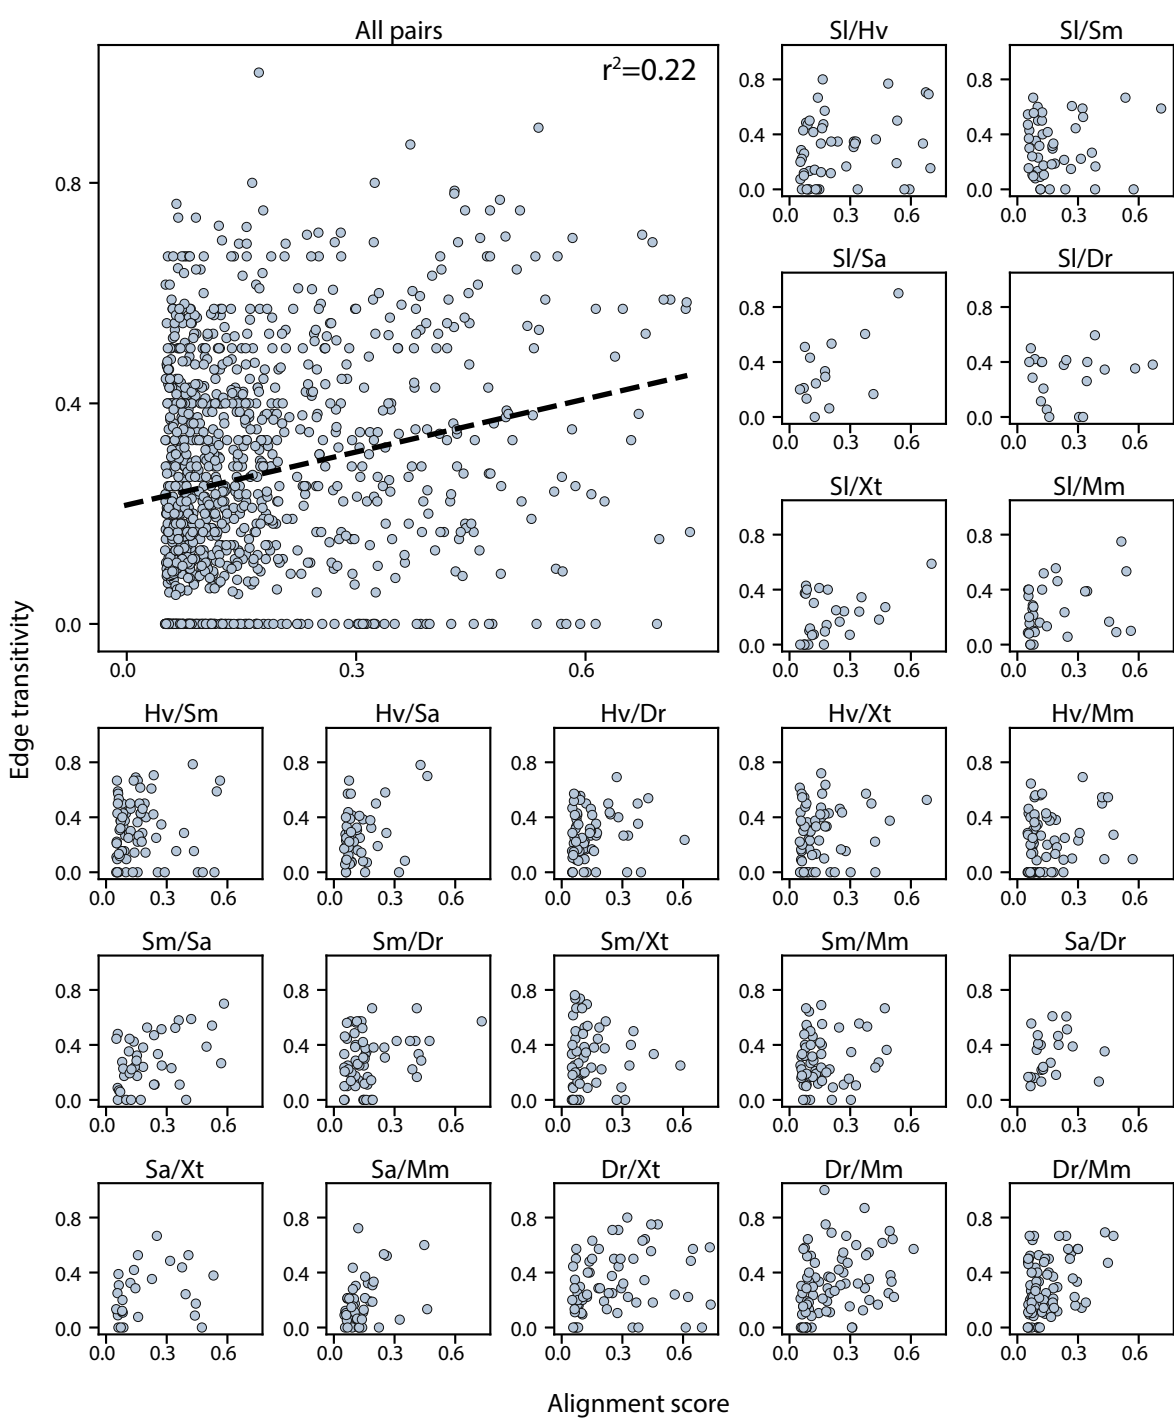

Supplement: supp [file elife-66747-supp-v1.zip]

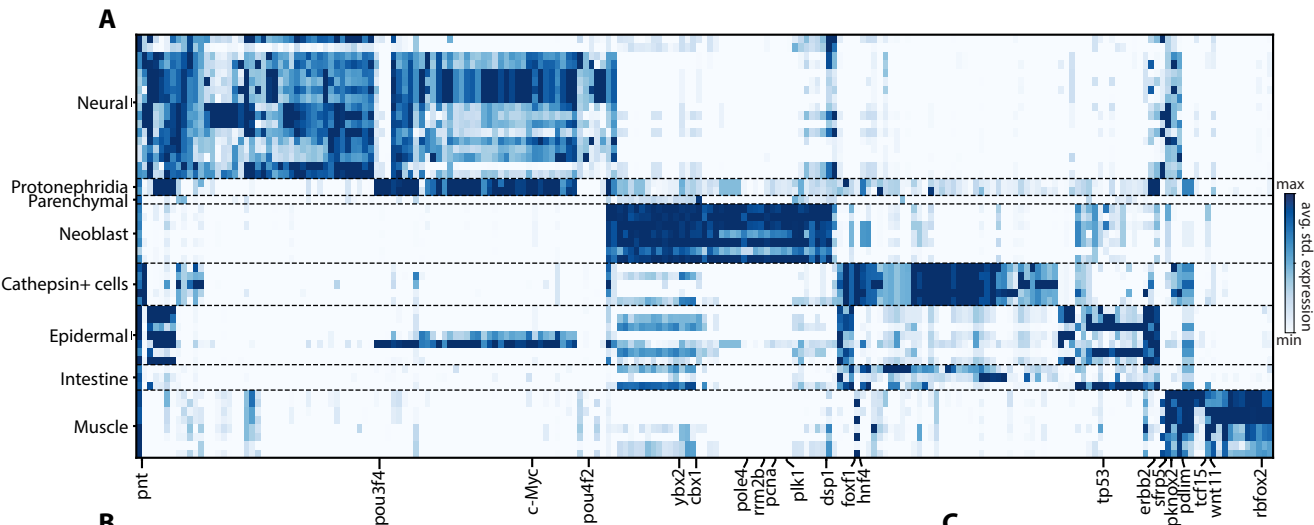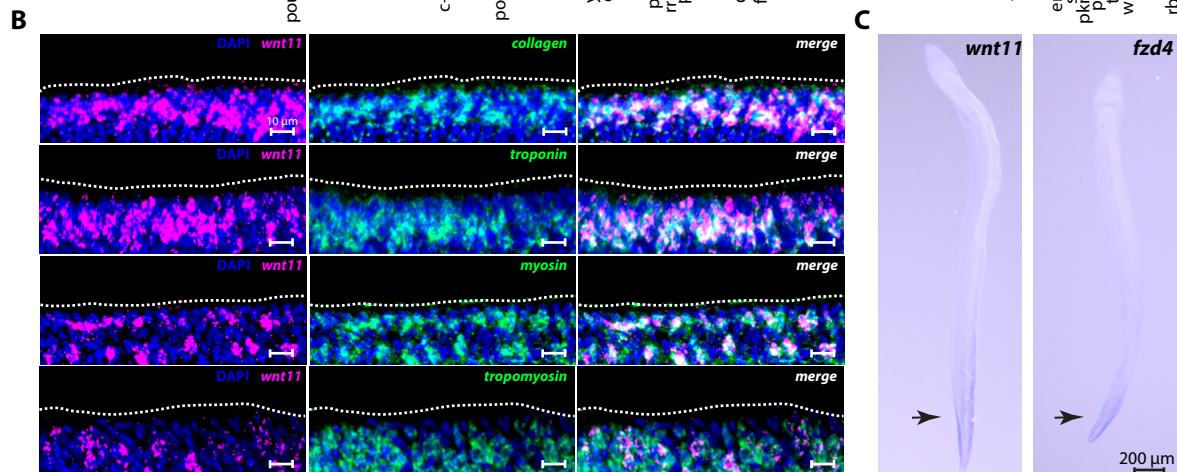

Supplement: supp [file elife-66747-supp-v1.zip]

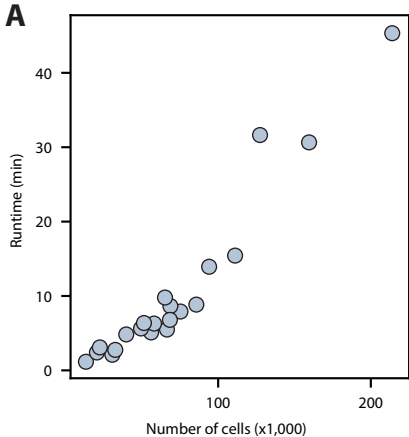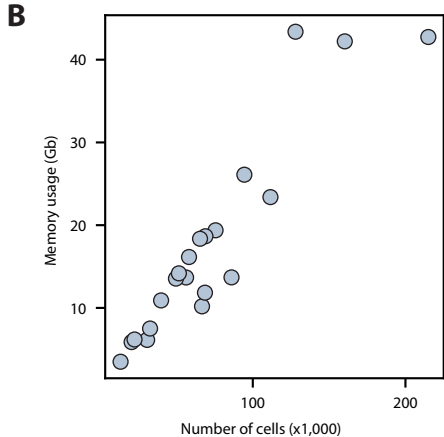

Supplement: supp [file elife-66747-supp-v1.zip]

**A**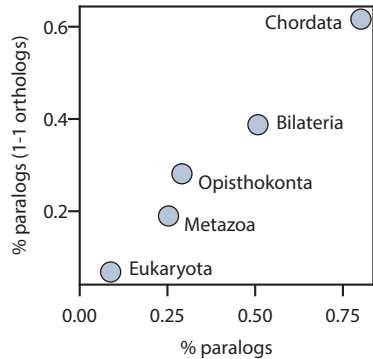**B**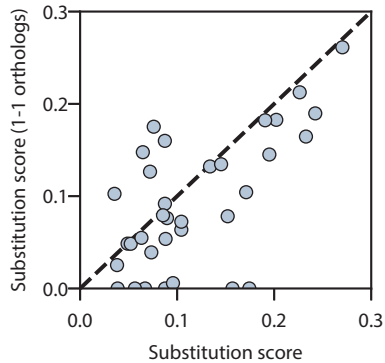**C**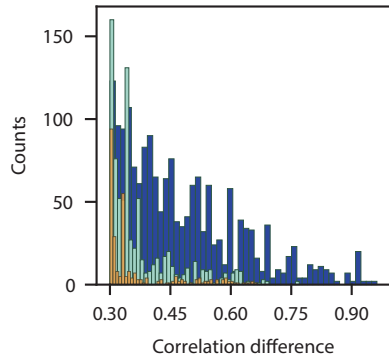

Supplement: supp [file elife-66747-supp-v1.zip]

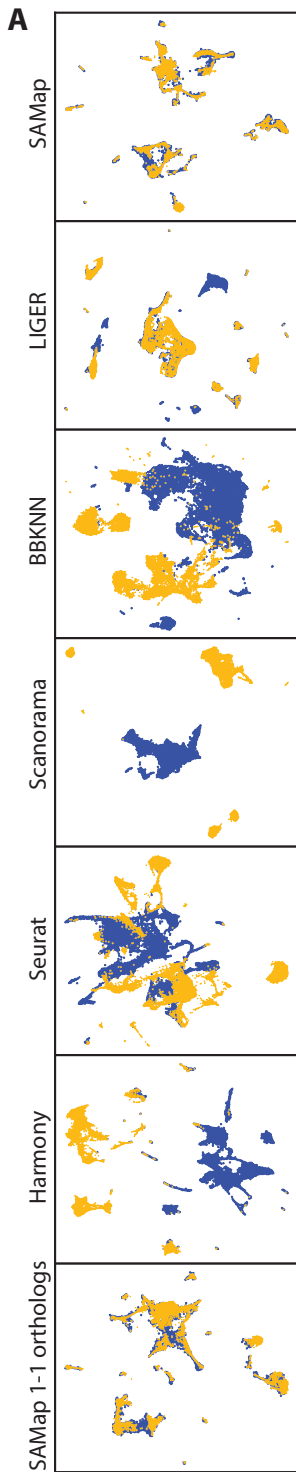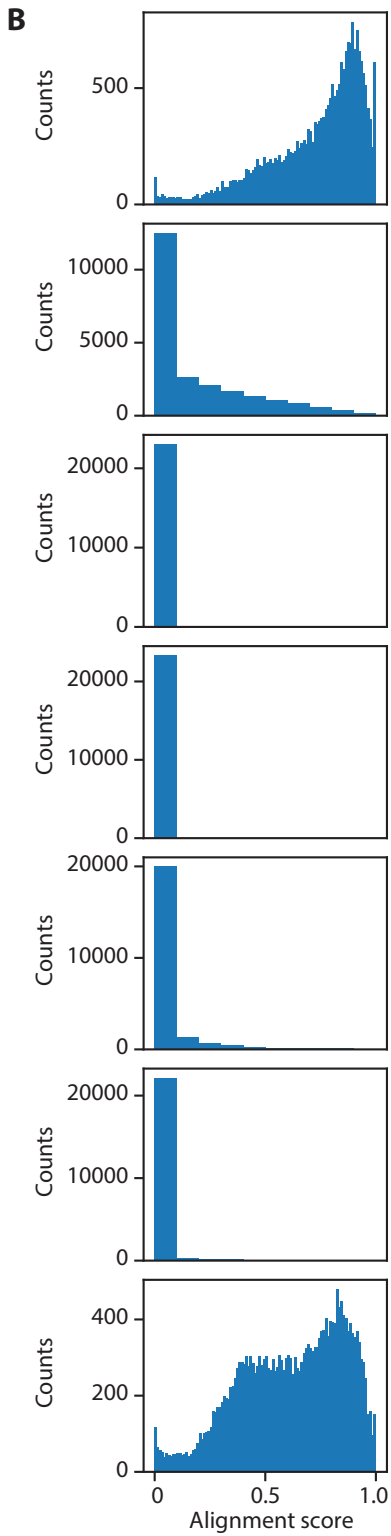

Supplement: supp [file elife-66747-supp-v1.zip]
